# Supplementary material for: Transcriptome and proteome dynamics during the embryonation of Fasciola hepatica eggs
Source: Research Square preprint supplement (doi:10.21203/rs.3.rs-850551/v1), 2021-09-07
Supplement: Supplementary file 2 [file 3f2c06eeab39309fef48272e.xlsx]

## Sheet: All transcripts and proteins
ALL TRANSCRIPTS AND PROTEINS DETECTED			Transcriptomics data results				Proteomics data results				Transcriptomics data results - statistically significant changes (adjusted P-value cut-off 0.05)			Proteomics data results - statistically significant changes (adjusted P-value cut-off 0.05)
F. hepatica protein ID (short name)	UniProt ID	UniProt protein	T0: Median of relative abundance (in TPM)	T5: Median of relative abundance (in TPM)	T10: Median of relative abundance (in TPM)	Summary	T0: Median of relative abundance (in PPM)	T5: Median of relative abundance (in PPM)	T10: Median of relative abundance (in PPM)	Summary	T0-T5 (in Log2FC)	T0-T10 (in Log2FC)	T5-T10 (in Log2FC)	T0-T5 (in Log2FC)	T0-T10 (in Log2FC)	T5-T10 (in Log2FC)
augustus_masked-scaffold10x_1_pilon-processed-gene-0.13-mRNA-1	no hit	no hit	10.41	26.05	29.14	T0+T5+T10	0	0	0	ND.	1.03597	0.913391	--	--	--	--
augustus_masked-scaffold10x_1013_pilon-processed-gene-0.139-mRNA-1	A0A4E0RL46	A0A4E0RL46|A0A4E0RL46_FASHE_Ubiquitin_modifier-activating_enzyme_6_OS=Fasciola_hepatica_OX=6192_GN=D915_001877_PE=4_SV=1	10.09	11.93	9.21	T0+T5+T10	0	0	0	ND.	--	-0.727996	--	--	--	--
augustus_masked-scaffold10x_102_pilon-processed-gene-0.16-mRNA-1	A0A2H1CH36	A0A2H1CH36|A0A2H1CH36_FASHE_Prefoldin_subunit_3_OS=Fasciola_hepatica_OX=6192_GN=D915_003852_PE=3_SV=1	0.4	0	0	T0	103.42	149.08	99.07	T0+T5+T10	--	--	--	--	--	--
augustus_masked-scaffold10x_1021_pilon-processed-gene-0.14-mRNA-1	A0A4E0RAA2	A0A4E0RAA2|A0A4E0RAA2_FASHE_Ubiquitin-like_domain-containing_protein_OS=Fasciola_hepatica_OX=6192_GN=D915_003816_PE=4_SV=1	8.59	16.83	15.97	T0+T5+T10	0	0	0	ND.	--	--	--	--	--	--
augustus_masked-scaffold10x_1068_pilon-processed-gene-0.63-mRNA-1	A0A4E0RDE3	A0A4E0RDE3|A0A4E0RDE3_FASHE_Nuclear_hormone_receptor_E75_OS=Fasciola_hepatica_OX=6192_GN=D915_003666_PE=3_SV=1	1	7.9	7.63	T0+T5+T10	0	0	0	ND.	2.28238	2.12589	--	--	--	--
augustus_masked-scaffold10x_1074_pilon-processed-gene-0.124-mRNA-1	A0A2H1CS82	A0A2H1CS82|A0A2H1CS82_FASHE_Sperm_flagellar_protein_1_OS=Fasciola_hepatica_OX=6192_GN=D915_001444_PE=4_SV=1	2.16	0.73	0	T0+T5	0	0	0	ND.	--	-5.64021	--	--	--	--
augustus_masked-scaffold10x_1084_pilon-processed-gene-0.111-mRNA-1	A0A2H1CBI3	A0A2H1CBI3|A0A2H1CBI3_FASHE_DnaK_family_protein_OS=Fasciola_hepatica_OX=6192_GN=D915_08022_PE=3_SV=1	25.89	0	0	T0	0	0	0	ND.	--	-10.4235	--	--	--	--
augustus_masked-scaffold10x_1084_pilon-processed-gene-0.123-mRNA-1	A0A0R3SV28	A0A0R3SV28|A0A0R3SV28_HYMDI_Histone_H3_OS=Hymenolepis_diminuta_OX=6216_GN=HDID_LOCUS9396_PE=3_SV=1	65.92	152.51	322.76	T0+T5+T10	0	0	0	ND.	0.878792	1.66132	0.851046	--	--	--
augustus_masked-scaffold10x_1086_pilon-processed-gene-0.85-mRNA-1	A0A4E0S3L6	A0A4E0S3L6|A0A4E0S3L6_FASHE_Cell_division_protein_kinase_9-B_OS=Fasciola_hepatica_OX=6192_GN=D915_001553_PE=3_SV=1	27.26	35.49	22.06	T0+T5+T10	0	0	0	ND.	--	-0.877251	--	--	--	--
augustus_masked-scaffold10x_1115_pilon-processed-gene-0.3-mRNA-1	A0A4E0R3R9	A0A4E0R3R9|A0A4E0R3R9_FASHE_Chloride_intracellular_channel_protein_4_OS=Fasciola_hepatica_OX=6192_GN=D915_008377_PE=4_SV=1	6.26	3.31	6.76	T0+T5+T10	0	0	0	ND.	--	--	--	--	--	--
augustus_masked-scaffold10x_1125_pilon-processed-gene-0.104-mRNA-1	A0A419PGC7	A0A419PGC7|A0A419PGC7_CLOSI_Serine/threonine-protein_phosphatase_6_regulatory_subunit_2_OS=Clonorchis_sinensis_OX=79923_GN=Ppp6r2_PE=4_SV=1	2.02	2.54	2.74	T0+T5+T10	0	0	0	ND.	--	--	--	--	--	--
augustus_masked-scaffold10x_113_pilon-processed-gene-0.221-mRNA-1	A0A4E0RH48	A0A4E0RH48|A0A4E0RH48_FASHE_DNA_helicase_MCM8_OS=Fasciola_hepatica_OX=6192_GN=D915_001033_PE=3_SV=1	6	10.94	10.87	T0+T5+T10	0	0	0	ND.	--	--	--	--	--	--
augustus_masked-scaffold10x_113_pilon-processed-gene-0.222-mRNA-1	A0A183AG94	A0A183AG94|A0A183AG94_9TREM_DNA_polymerase_OS=Echinostoma_caproni_OX=27848_PE=3_SV=1	8.03	23.52	36.64	T0+T5+T10	0	0	0	ND.	1.06254	1.33236	--	--	--	--
augustus_masked-scaffold10x_1160_pilon-processed-gene-0.17-mRNA-1	A0A2H1CIT9	A0A2H1CIT9|A0A2H1CIT9_FASHE_Cytohesin_guanine_nucleotide-exchange_protein_OS=Fasciola_hepatica_OX=6192_GN=D915_003351_PE=4_SV=1	0.15	0	0	T0	0	0	0	ND.	--	--	--	--	--	--
augustus_masked-scaffold10x_1160_pilon-processed-gene-0.19-mRNA-1	A0A4E0RG60	A0A4E0RG60|A0A4E0RG60_FASHE_Telomerase_Cajal_body_protein_1_OS=Fasciola_hepatica_OX=6192_GN=D915_004042_PE=4_SV=1	9.44	13.92	22.13	T0+T5+T10	0	0	0	ND.	--	--	--	--	--	--
augustus_masked-scaffold10x_1175_pilon-processed-gene-0.36-mRNA-1	A0A2H1CTF9	A0A2H1CTF9|A0A2H1CTF9_FASHE_RRM_domain-containing_protein_OS=Fasciola_hepatica_OX=6192_GN=D915_16172_PE=4_SV=1	59.54	81.56	67.43	T0+T5+T10	0	0	0	ND.	--	-0.534477	--	--	--	--
augustus_masked-scaffold10x_120_pilon-processed-gene-0.31-mRNA-1	A0A4E0RHT9	A0A4E0RHT9|A0A4E0RHT9_FASHE_Dedicator_of_cytokinesis_protein_11_OS=Fasciola_hepatica_OX=6192_GN=D915_002146_PE=3_SV=1	0.06	0.15	0.13	T0+T5+T10	0	0	0	ND.	--	--	--	--	--	--
augustus_masked-scaffold10x_1236_pilon-processed-gene-0.0-mRNA-1	A0A2H1CFJ4	A0A2H1CFJ4|A0A2H1CFJ4_FASHE_DEAD-box_ATP-dependent_RNA_helicase_30_OS=Fasciola_hepatica_OX=6192_GN=D915_003901_PE=3_SV=1	66.49	112.03	139.76	T0+T5+T10	27.57	77.48	46.83	T0+T5+T10	0.457966	--	--	--	--	--
augustus_masked-scaffold10x_1257_pilon-processed-gene-0.0-mRNA-1	A0A4E0RXT3	A0A4E0RXT3|A0A4E0RXT3_FASHE_Cullin-2_OS=Fasciola_hepatica_OX=6192_GN=D915_008282_PE=3_SV=1	53.88	84.54	102.26	T0+T5+T10	0	0	0	ND.	--	--	--	--	--	--
augustus_masked-scaffold10x_1257_pilon-processed-gene-0.1-mRNA-1	A0A504YR91	A0A504YR91|A0A504YR91_FASGI_F-box_and_WD-40_domain_protein_7_OS=Fasciola_gigantica_OX=46835_GN=FGIG_04575_PE=4_SV=1	5.17	5.65	16.95	T0+T5+T10	0	0	0	ND.	--	0.924867	--	--	--	--
augustus_masked-scaffold10x_1272_pilon-processed-gene-0.85-mRNA-1	A0A504YM89	A0A504YM89|A0A504YM89_FASGI_Calcineurin-binding_protein_cabin-1_OS=Fasciola_gigantica_OX=46835_GN=FGIG_07110_PE=4_SV=1	3.16	4.24	5.48	T0+T5+T10	0	0	0	ND.	--	--	--	--	--	--
augustus_masked-scaffold10x_13_pilon-processed-gene-0.101-mRNA-1	A0A4E0RP31	A0A4E0RP31|A0A4E0RP31_FASHE_G/T_mismatch-specific_thymine_DNA_glycosylase_OS=Fasciola_hepatica_OX=6192_GN=D915_000397_PE=4_SV=1	5.61	22.47	51.15	T0+T5+T10	0	0	0	ND.	1.60808	2.34095	--	--	--	--
augustus_masked-scaffold10x_1309_pilon-processed-gene-0.7-mRNA-1	A0A4E0S4B6	A0A4E0S4B6|A0A4E0S4B6_FASHE_DIS3_exonuclease_2_OS=Fasciola_hepatica_OX=6192_GN=D915_000099_PE=4_SV=1	0.7	0.33	0.21	T0+T5+T10	0	0	0	ND.	--	-1.70102	--	--	--	--
augustus_masked-scaffold10x_1318_pilon-processed-gene-0.40-mRNA-1	A0A2H1CKN9	A0A2H1CKN9|A0A2H1CKN9_FASHE_Histone_H2A_OS=Fasciola_hepatica_OX=6192_GN=D915_002864_PE=3_SV=1	795.13	2058.66	3173.06	T0+T5+T10	102.6	103.59	183.7	T0+T5+T10	0.969194	1.27961	--	--	--	1.30003
augustus_masked-scaffold10x_136_pilon-processed-gene-0.21-mRNA-1	A0A4E0RNK4	A0A4E0RNK4|A0A4E0RNK4_FASHE_Trans-2-enoyl-CoA_reductase_mitochondrial_OS=Fasciola_hepatica_OX=6192_GN=D915_006700_PE=4_SV=1	4.57	11.99	26.17	T0+T5+T10	0	0	0	ND.	--	--	--	--	--	--
augustus_masked-scaffold10x_1382_pilon-processed-gene-0.48-mRNA-1	A0A4E0RZ22	A0A4E0RZ22|A0A4E0RZ22_FASHE_Nucleolar_complex_protein_2_OS=Fasciola_hepatica_OX=6192_GN=D915_004930_PE=4_SV=1	38.68	106.41	134.68	T0+T5+T10	0	0	0	ND.	1.02563	1.2258	--	--	--	--
augustus_masked-scaffold10x_1420_pilon-processed-gene-0.60-mRNA-1	A0A4E0S0K6	A0A4E0S0K6|A0A4E0S0K6_FASHE_Tyrosine-protein_kinase_OS=Fasciola_hepatica_OX=6192_GN=D915_003399_PE=3_SV=1	0.94	1.69	1.76	T0+T5+T10	0	0	0	ND.	--	--	--	--	--	--
augustus_masked-scaffold10x_1435_pilon-processed-gene-0.25-mRNA-1	A0A4E0RYX5	A0A4E0RYX5|A0A4E0RYX5_FASHE_LMBR1_domain_containing_protein_2_OS=Fasciola_hepatica_OX=6192_GN=D915_005007_PE=4_SV=1	43.09	43.65	31.94	T0+T5+T10	0	0	0	ND.	--	-1.03997	--	--	--	--
augustus_masked-scaffold10x_1446_pilon-processed-gene-0.53-mRNA-1	A0A4E0RTY0	A0A4E0RTY0|A0A4E0RTY0_FASHE_Ankyrin_repeat_domain-containing_protein_13A_OS=Fasciola_hepatica_OX=6192_GN=D915_005040_PE=4_SV=1	18.07	16.79	20.86	T0+T5+T10	12.61	74.89	43.13	T0+T5+T10	--	-0.588951	--	--	--	--
augustus_masked-scaffold10x_145_pilon-processed-gene-2.121-mRNA-1	A0A504Y6N7	A0A504Y6N7|A0A504Y6N7_FASGI_E3_ubiquitin-protein_ligase_listerin_OS=Fasciola_gigantica_OX=46835_GN=FGIG_04123_PE=4_SV=1	0.04	0.06	0	T0+T5	0	0	0	ND.	--	--	--	--	--	--
augustus_masked-scaffold10x_1459_pilon-processed-gene-0.44-mRNA-1	A0A4E0S1Y1	A0A4E0S1Y1|A0A4E0S1Y1_FASHE_E3_ubiquitin-protein_ligase_UBR4_OS=Fasciola_hepatica_OX=6192_GN=D915_002047_PE=4_SV=1	2.52	2.31	2.76	T0+T5+T10	0	0	0	ND.	--	--	--	--	--	--
augustus_masked-scaffold10x_1459_pilon-processed-gene-0.48-mRNA-1	A0A4E0R7A1	A0A4E0R7A1|A0A4E0R7A1_FASHE_Succinate--CoA_ligase_[ADP-forming]_subunit_beta,_mitochondrial_OS=Fasciola_hepatica_OX=6192_GN=D915_006110_PE=3_SV=1	0.16	0.87	0	T0+T5	0	0	0	ND.	--	--	--	--	--	--
augustus_masked-scaffold10x_149_pilon-processed-gene-0.60-mRNA-1	A0A2H1BY44	A0A2H1BY44|A0A2H1BY44_FASHE_Spliceosome-associated-protein_114_OS=Fasciola_hepatica_OX=6192_GN=D915_008382_PE=4_SV=1	2.23	5.08	3.46	T0+T5+T10	0	0	0	ND.	--	--	--	--	--	--
augustus_masked-scaffold10x_149_pilon-processed-gene-0.64-mRNA-1	A0A4E0R249	A0A4E0R249|A0A4E0R249_FASHE_DNA_replication_factor_c_subunit_OS=Fasciola_hepatica_OX=6192_GN=D915_009525_PE=4_SV=1	21.02	29.75	51.76	T0+T5+T10	0	0	0	ND.	--	--	--	--	--	--
augustus_masked-scaffold10x_1549_pilon-processed-gene-0.0-mRNA-1	A0A2H1C7F2	A0A2H1C7F2|A0A2H1C7F2_FASHE_Fructose-bisphosphate_aldolase_OS=Fasciola_hepatica_OX=6192_GN=D915_006642_PE=3_SV=1	2886.66	1816.8	1236.63	T0+T5+T10	4455.21	5371.67	3920.3	T0+T5+T10	-1.13777	-1.85206	-0.649956	--	--	-0.464081
augustus_masked-scaffold10x_1549_pilon-processed-gene-0.10-mRNA-1	A0A4E0RLR9	A0A4E0RLR9|A0A4E0RLR9_FASHE_SWI:SNF_matrix_associated_OS=Fasciola_hepatica_OX=6192_GN=D915_000815_PE=4_SV=1	14.01	19.81	27.96	T0+T5+T10	0	0	0	ND.	--	--	--	--	--	--
augustus_masked-scaffold10x_1549_pilon-processed-gene-0.2-mRNA-1	A0A4E0R0S6	A0A4E0R0S6|A0A4E0R0S6_FASHE_Protein_TAPT1_OS=Fasciola_hepatica_OX=6192_GN=D915_009806_PE=4_SV=1	3.99	6.7	12.47	T0+T5+T10	0	0	0	ND.	--	0.721616	--	--	--	--
augustus_masked-scaffold10x_157_pilon-processed-gene-0.14-mRNA-1	A0A4E0S2B7	A0A4E0S2B7|A0A4E0S2B7_FASHE_TFIIH_basal_transcription_factor_complex_helicase_XPD_subunit_OS=Fasciola_hepatica_OX=6192_GN=D915_003382_PE=4_SV=1	29.34	21.64	14.91	T0+T5+T10	0	0	0	ND.	-0.7222	-1.58193	-0.794272	--	--	--
augustus_masked-scaffold10x_1651_pilon-processed-gene-0.31-mRNA-1	A0A4E0R0N1	A0A4E0R0N1|A0A4E0R0N1_FASHE_Flotillin_OS=Fasciola_hepatica_OX=6192_GN=D915_008167_PE=3_SV=1	0.43	0.63	0.42	T0+T5+T10	0	0	0	ND.	--	--	--	--	--	--
augustus_masked-scaffold10x_166_pilon-processed-gene-0.13-mRNA-1	A0A4E0RXA1	A0A4E0RXA1|A0A4E0RXA1_FASHE_Eukaryotic_translation_initiation_factor_4H_OS=Fasciola_hepatica_OX=6192_GN=D915_006567_PE=4_SV=1	14.03	24.39	33.64	T0+T5+T10	0	0	0	ND.	0.461116	0.688456	--	--	--	--
augustus_masked-scaffold10x_166_pilon-processed-gene-0.4-mRNA-1	A0A4E0R7E8	A0A4E0R7E8|A0A4E0R7E8_FASHE_Bromodomain_adjacent_to_zinc_finger_domain_protein_2B_OS=Fasciola_hepatica_OX=6192_GN=D915_007164_PE=4_SV=1	0.45	1.74	2.55	T0+T5+T10	0	0	0	ND.	--	1.81494	--	--	--	--
augustus_masked-scaffold10x_172_pilon-processed-gene-0.83-mRNA-1	A0A183ANB9	A0A183ANB9|A0A183ANB9_9TREM_BZIP_domain-containing_protein_OS=Echinostoma_caproni_OX=27848_GN=ECPE_LOCUS8454_PE=4_SV=1	0.63	2.31	2.59	T0+T5+T10	0	0	0	ND.	--	1.3982	--	--	--	--
augustus_masked-scaffold10x_173_pilon-processed-gene-0.59-mRNA-1	A0A2H1C2B4	A0A2H1C2B4|A0A2H1C2B4_FASHE_Transcription_and_mRNA_export_factor_ENY2_OS=Fasciola_hepatica_OX=6192_GN=D915_007474_PE=3_SV=1	0	0	0	ND.	520.15	40.31	0	T0+T5	--	--	--	--	--	--
augustus_masked-scaffold10x_173_pilon-processed-gene-0.60-mRNA-1	A0A2H1CS40	A0A2H1CS40|A0A2H1CS40_FASHE_THAP_domain_protein_OS=Fasciola_hepatica_OX=6192_GN=D915_16169_PE=4_SV=1	5.68	6.48	2.8	T0+T5+T10	0	0	0	ND.	--	-1.65357	-1.28713	--	--	--
augustus_masked-scaffold10x_1781_pilon-processed-gene-0.18-mRNA-1	A0A2H1C8M1	A0A2H1C8M1|A0A2H1C8M1_FASHE_Dual_specificity_mitogen-activated_protein_kinase_kinase_hemipterous_OS=Fasciola_hepatica_OX=6192_GN=D915_005833_PE=4_SV=1	6.92	9.45	14.68	T0+T5+T10	0	0	0	ND.	--	--	--	--	--	--
augustus_masked-scaffold10x_1784_pilon-processed-gene-0.37-mRNA-1	A0A4E0RSZ9	A0A4E0RSZ9|A0A4E0RSZ9_FASHE_Tuftelin-interacting_protein_11_OS=Fasciola_hepatica_OX=6192_GN=D915_004824_PE=3_SV=1	8.92	26.57	20.46	T0+T5+T10	0	0	0	ND.	1.18837	0.632562	--	--	--	--
augustus_masked-scaffold10x_179_pilon-processed-gene-0.17-mRNA-1	A0A4E0R1J7	A0A4E0R1J7|A0A4E0R1J7_FASHE_Carboxypeptidase_D_OS=Fasciola_hepatica_OX=6192_GN=D915_009156_PE=4_SV=1	3.73	8.23	8.79	T0+T5+T10	0	0	0	ND.	--	--	--	--	--	--
augustus_masked-scaffold10x_1859_pilon-processed-gene-0.55-mRNA-1	A0A2H1BWU2	A0A2H1BWU2|A0A2H1BWU2_FASHE_Histone_deacetylase_OS=Fasciola_hepatica_OX=6192_GN=D915_009817_PE=3_SV=1	0.71	0	0	T0	0	0	0	ND.	--	--	--	--	--	--
augustus_masked-scaffold10x_1866_pilon-processed-gene-0.25-mRNA-1	A0A4E0RHN0	A0A4E0RHN0|A0A4E0RHN0_FASHE_Protein_unc-80_OS=Fasciola_hepatica_OX=6192_GN=D915_002457_PE=4_SV=1	0.04	0	0	T0	0	0	0	ND.	--	--	--	--	--	--
augustus_masked-scaffold10x_19_pilon-processed-gene-0.133-mRNA-1	Q5C2Z5	Q5C2Z5|Q5C2Z5_SCHJA_SJCHGC09423_protein_(Fragment)_OS=Schistosoma_japonicum_OX=6182_PE=2_SV=2	25.96	35.35	52.68	T0+T5+T10	0	0	0	ND.	--	--	--	--	--	--
augustus_masked-scaffold10x_19_pilon-processed-gene-0.138-mRNA-1	A0A4E0RFS9	A0A4E0RFS9|A0A4E0RFS9_FASHE_Choline_O-acetyltransferase_OS=Fasciola_hepatica_OX=6192_GN=D915_004024_PE=3_SV=1	0.38	0.2	0	T0+T5	0	0	0	ND.	--	--	--	--	--	--
augustus_masked-scaffold10x_1995_pilon-processed-gene-0.23-mRNA-1	no hit	no hit	1.58	7.84	27.56	T0+T5+T10	0	0	0	ND.	--	3.2364	--	--	--	--
augustus_masked-scaffold10x_200_pilon-processed-gene-0.0-mRNA-1	no hit	no hit	528.4	412.1	318.64	T0+T5+T10	0	0	0	ND.	-0.773695	-1.35034	--	--	--	--
augustus_masked-scaffold10x_202_pilon-processed-gene-0.0-mRNA-1	no hit	no hit	0.06	0	0.11	T0+T10	0	0	0	ND.	--	--	--	--	--	--
augustus_masked-scaffold10x_204_pilon-processed-gene-0.8-mRNA-1	no hit	no hit	530.34	563.76	436.66	T0+T5+T10	0	0	0	ND.	--	-0.656621	--	--	--	--
augustus_masked-scaffold10x_205_pilon-processed-gene-0.0-mRNA-1	A0A4E0RQP0	A0A4E0RQP0|A0A4E0RQP0_FASHE_Cysteine_protease_OS=Fasciola_hepatica_OX=6192_GN=D915_009795_PE=4_SV=1	0.04	0	0	T0	0	0	0	ND.	--	--	--	--	--	--
augustus_masked-scaffold10x_206_pilon-processed-gene-0.10-mRNA-1	A0A4E0S159	A0A4E0S159|A0A4E0S159_FASHE_Pre_mRNA_splicing_factor_SYF1_OS=Fasciola_hepatica_OX=6192_GN=D915_002953_PE=4_SV=1	2.7	4.5	4.12	T0+T5+T10	0	0	0	ND.	--	--	--	--	--	--
augustus_masked-scaffold10x_2113_pilon-processed-gene-0.3-mRNA-1	A0A4E0R4N9	A0A4E0R4N9|A0A4E0R4N9_FASHE_Sodium:myo_inositol_cotransporter_OS=Fasciola_hepatica_OX=6192_GN=D915_007883_PE=3_SV=1	0.64	0.76	1.58	T0+T5+T10	0	0	0	ND.	--	--	--	--	--	--
augustus_masked-scaffold10x_2264_pilon-processed-gene-0.1-mRNA-1	G7YWD8	G7YWD8|G7YWD8_CLOSI_Histone_H2B_OS=Clonorchis_sinensis_OX=79923_GN=histh2b_PE=3_SV=1	8.49	10.43	18.8	T0+T5+T10	12456	14019.7	17592.1	T0+T5+T10	--	--	--	--	--	--
augustus_masked-scaffold10x_2264_pilon-processed-gene-0.2-mRNA-1	G7YWD8	G7YWD8|G7YWD8_CLOSI_Histone_H2B_OS=Clonorchis_sinensis_OX=79923_GN=histh2b_PE=3_SV=1	8.49	10.43	18.8	T0+T5+T10	0	0	0	ND.	--	--	--	--	--	--
augustus_masked-scaffold10x_24_pilon-processed-gene-0.78-mRNA-1	A0A4E0R0C8	A0A4E0R0C8|A0A4E0R0C8_FASHE_Methyltransferase_protein_11A_OS=Fasciola_hepatica_OX=6192_GN=D915_008491_PE=4_SV=1	2.76	6.35	6.36	T0+T5+T10	0	0	0	ND.	--	--	--	--	--	--
augustus_masked-scaffold10x_259_pilon-processed-gene-0.141-mRNA-1	A0A504YSQ5	A0A504YSQ5|A0A504YSQ5_FASGI_HEAT_repeat-containing_protein_2_OS=Fasciola_gigantica_OX=46835_GN=FGIG_00496_PE=4_SV=1	2.17	1.78	2.1	T0+T5+T10	0	0	0	ND.	--	--	--	--	--	--
augustus_masked-scaffold10x_26_pilon-processed-gene-0.45-mRNA-1	A0A4E0S2C9	A0A4E0S2C9|A0A4E0S2C9_FASHE_Talin_OS=Fasciola_hepatica_OX=6192_GN=D915_001787_PE=4_SV=1	46.86	50.18	44.73	T0+T5+T10	0	0	0	ND.	-0.397066	-0.626093	--	--	--	--
augustus_masked-scaffold10x_263_pilon-processed-gene-0.122-mRNA-1	A0A4E0R0D1	A0A4E0R0D1|A0A4E0R0D1_FASHE_Sodium-coupled_monocarboxylate_transporter_2_OS=Fasciola_hepatica_OX=6192_GN=D915_008042_PE=3_SV=1	15.43	9.99	5.23	T0+T5+T10	0	0	0	ND.	-1.04741	-1.99309	--	--	--	--
augustus_masked-scaffold10x_263_pilon-processed-gene-0.127-mRNA-1	A0A4E0RT58	A0A4E0RT58|A0A4E0RT58_FASHE_Nucleolar_protein_56_OS=Fasciola_hepatica_OX=6192_GN=D915_005286_PE=4_SV=1	0.68	1.41	1.89	T0+T5+T10	0	0	0	ND.	--	--	--	--	--	--
augustus_masked-scaffold10x_263_pilon-processed-gene-0.129-mRNA-1	A0A4E0R4A6	A0A4E0R4A6|A0A4E0R4A6_FASHE_Peptidyl-tRNA_hydrolase_II_OS=Fasciola_hepatica_OX=6192_GN=D915_007368_PE=4_SV=1	8.9	6.29	28.97	T0+T5+T10	0	231.68	155.79	T5+T10	--	--	--	--	--	--
augustus_masked-scaffold10x_265_pilon-processed-gene-0.5-mRNA-1	A0A4E0R4L3	A0A4E0R4L3|A0A4E0R4L3_FASHE_Mitogen-activated_protein_kinase_kinase_kinase_9_OS=Fasciola_hepatica_OX=6192_GN=D915_006472_PE=4_SV=1	1.92	2.77	3.62	T0+T5+T10	0	0	0	ND.	--	--	--	--	--	--
augustus_masked-scaffold10x_267_pilon-processed-gene-0.64-mRNA-1	no hit	no hit	7.19	13.48	10.6	T0+T5+T10	0	0	0	ND.	--	--	--	--	--	--
augustus_masked-scaffold10x_269_pilon-processed-gene-0.18-mRNA-1	A0A2H1C3Q6	A0A2H1C3Q6|A0A2H1C3Q6_FASHE_Actin_OS=Fasciola_hepatica_OX=6192_GN=D915_006891_PE=3_SV=1	1740.96	1920.51	1737.87	T0+T5+T10	22045.6	19663.5	43425.6	T0+T5+T10	-0.397665	-0.631446	--	--	--	--
augustus_masked-scaffold10x_269_pilon-processed-gene-0.22-mRNA-1	A0A2H1C3E9	A0A2H1C3E9|A0A2H1C3E9_FASHE_Actin_OS=Fasciola_hepatica_OX=6192_GN=D915_007459_PE=3_SV=1	0	0	0.75	T10	0	0	0	ND.	--	--	--	--	--	--
augustus_masked-scaffold10x_270_pilon-processed-gene-0.29-mRNA-1	A0A4E0RJC6	A0A4E0RJC6|A0A4E0RJC6_FASHE_Gudu_OS=Fasciola_hepatica_OX=6192_GN=D915_003046_PE=4_SV=1	0.05	0	0	T0	0	0	0	ND.	--	--	--	--	--	--
augustus_masked-scaffold10x_2722_pilon-processed-gene-0.1-mRNA-1	A0A2H1BWU2	A0A2H1BWU2|A0A2H1BWU2_FASHE_Histone_deacetylase_OS=Fasciola_hepatica_OX=6192_GN=D915_009817_PE=3_SV=1	3.35	6.79	5.97	T0+T5+T10	0	0	0	ND.	--	--	--	--	--	--
augustus_masked-scaffold10x_2755_pilon-processed-gene-0.0-mRNA-1	A0A4E0R097	A0A4E0R097|A0A4E0R097_FASHE_TATA_box-binding_protein_1_OS=Fasciola_hepatica_OX=6192_GN=D915_008610_PE=4_SV=1	0	0	0.21	T10	0	0	0	ND.	--	--	--	--	--	--
augustus_masked-scaffold10x_277_pilon-processed-gene-0.28-mRNA-1	A0A4E0R6W8	A0A4E0R6W8|A0A4E0R6W8_FASHE_Vitamin_D3_receptor_B_OS=Fasciola_hepatica_OX=6192_GN=D915_005878_PE=3_SV=1	1.72	3.42	10.53	T0+T5+T10	0	0	0	ND.	--	1.58196	--	--	--	--
augustus_masked-scaffold10x_295_pilon-processed-gene-0.26-mRNA-1	A0A4E0RXQ9	A0A4E0RXQ9|A0A4E0RXQ9_FASHE_Regulator_of_nonsense_transcripts_2_OS=Fasciola_hepatica_OX=6192_GN=D915_005818_PE=4_SV=1	0.28	0.78	0.41	T0+T5+T10	0	0	0	ND.	--	--	--	--	--	--
augustus_masked-scaffold10x_303_pilon-processed-gene-0.95-mRNA-1	A0A2H1CKP4	A0A2H1CKP4|A0A2H1CKP4_FASHE_RRM_domain-containing_protein_OS=Fasciola_hepatica_OX=6192_GN=D915_04601_PE=4_SV=1	3.48	7.4	6.9	T0+T5+T10	0	0	0	ND.	--	--	--	--	--	--
augustus_masked-scaffold10x_313_pilon-processed-gene-0.108-mRNA-1	A0A2H1C3S5	A0A2H1C3S5|A0A2H1C3S5_FASHE_DJ-1_family_protein_OS=Fasciola_hepatica_OX=6192_GN=D915_007348_PE=4_SV=1	644.53	860.63	1564.79	T0+T5+T10	1665.39	1754.82	2355.34	T0+T5+T10	--	0.555622	--	--	--	--
augustus_masked-scaffold10x_313_pilon-processed-gene-0.112-mRNA-1	A0A4E0RGJ5	A0A4E0RGJ5|A0A4E0RGJ5_FASHE_Phosducin_protein_(Phlp)_OS=Fasciola_hepatica_OX=6192_GN=D915_001072_PE=4_SV=1	26.8	36.32	62.06	T0+T5+T10	0	0	0	ND.	--	--	--	--	--	--
augustus_masked-scaffold10x_314_pilon-processed-gene-0.34-mRNA-1	A0A4E0R865	A0A4E0R865|A0A4E0R865_FASHE_Phosphoribosyl_pyrophosphate_synthetase-associated_protein_2_OS=Fasciola_hepatica_OX=6192_GN=D915_007324_PE=4_SV=1	78.74	120.93	160.07	T0+T5+T10	0	0	0	ND.	--	--	--	--	--	--
augustus_masked-scaffold10x_323_pilon-processed-gene-0.5-mRNA-1	A0A4E0R3U9	A0A4E0R3U9|A0A4E0R3U9_FASHE_PRP31_pre-mRNA_processing_factor_31_(Predicted)_OS=Fasciola_hepatica_OX=6192_GN=D915_006734_PE=4_SV=1	1.8	3.74	4.77	T0+T5+T10	0	0	0	ND.	--	--	--	--	--	--
augustus_masked-scaffold10x_327_pilon-processed-gene-0.65-mRNA-1	A0A504YJ68	A0A504YJ68|A0A504YJ68_FASGI_Coiled-coil_domain-containing_protein_77_OS=Fasciola_gigantica_OX=46835_GN=FGIG_04937_PE=4_SV=1	28.29	26.89	36.63	T0+T5+T10	0	0	0	ND.	--	--	--	--	--	--
augustus_masked-scaffold10x_330_pilon-processed-gene-0.50-mRNA-1	A0A4E0RL35	A0A4E0RL35|A0A4E0RL35_FASHE_Putative_pyrophosphate-dependent_phosphofructo-1-kinase_OS=Fasciola_hepatica_OX=6192_GN=D915_000011_PE=4_SV=1	107.57	152.07	129.33	T0+T5+T10	182.14	174.98	165.94	T0+T5+T10	--	-0.430477	--	--	--	--
augustus_masked-scaffold10x_331_pilon-processed-gene-0.47-mRNA-1	A0A2H1CS34	A0A2H1CS34|A0A2H1CS34_FASHE_Eukaryotic_porin_OS=Fasciola_hepatica_OX=6192_GN=D915_001327_PE=4_SV=1	0.2	0.75	0.51	T0+T5+T10	0	0	0	ND.	--	--	--	--	--	--
augustus_masked-scaffold10x_338_pilon-processed-gene-0.11-mRNA-1	A0A4E0RHW7	A0A4E0RHW7|A0A4E0RHW7_FASHE_WAPL_domain-containing_protein_OS=Fasciola_hepatica_OX=6192_GN=D915_002074_PE=4_SV=1	4.21	12.04	11.54	T0+T5+T10	0	0	0	ND.	1.15522	0.848432	--	--	--	--
augustus_masked-scaffold10x_340_pilon-processed-gene-0.60-mRNA-1	A0A4E0S2W0	A0A4E0S2W0|A0A4E0S2W0_FASHE_TIR_domain-containing_protein_OS=Fasciola_hepatica_OX=6192_GN=D915_001036_PE=4_SV=1	0.09	0	0	T0	0	0	0	ND.	--	--	--	--	--	--
augustus_masked-scaffold10x_345_pilon-processed-gene-0.23-mRNA-1	A0A4E0RIJ7	A0A4E0RIJ7|A0A4E0RIJ7_FASHE_General_transcription_factor_II-I_repeat_domain-containing_protein_2_OS=Fasciola_hepatica_OX=6192_GN=D915_001312_PE=4_SV=1	26.52	27.83	41.15	T0+T5+T10	0	0	0	ND.	--	--	--	--	--	--
augustus_masked-scaffold10x_345_pilon-processed-gene-1.13-mRNA-1	A0A4E0R3X5	A0A4E0R3X5|A0A4E0R3X5_FASHE_39S_ribosomal_protein_L4_mitochondrial_OS=Fasciola_hepatica_OX=6192_GN=D915_008300_PE=4_SV=1	23.78	30.92	45.42	T0+T5+T10	0	0	0	ND.	--	--	--	--	--	--
augustus_masked-scaffold10x_349_pilon-processed-gene-0.70-mRNA-1	A0A504YFZ8	A0A504YFZ8|A0A504YFZ8_FASGI_Putative_inorganic_pyrophosphatase_OS=Fasciola_gigantica_OX=46835_GN=FGIG_02207_PE=4_SV=1	20.74	41.61	33.07	T0+T5+T10	0	0	0	ND.	0.650845	--	-0.674921	--	--	--
augustus_masked-scaffold10x_355_pilon-processed-gene-0.44-mRNA-1	A0A183AH23	A0A183AH23|A0A183AH23_9TREM_Elongation_factor_1-alpha_OS=Echinostoma_caproni_OX=27848_GN=ECPE_LOCUS6258_PE=3_SV=1	1954.02	2053.6	2951.02	T0+T5+T10	14774.6	15725.3	15933.7	T0+T5+T10	--	--	--	--	--	--
augustus_masked-scaffold10x_370_pilon-processed-gene-0.86-mRNA-1	A0A504YU95	A0A504YU95|A0A504YU95_FASGI_Mitogen-activated_protein_kinase_kinase_kinase_15_OS=Fasciola_gigantica_OX=46835_GN=FGIG_02765_PE=4_SV=1	0.23	0.44	0	T0+T5	0	0	0	ND.	--	-5.66275	-6.12776	--	--	--
augustus_masked-scaffold10x_377_pilon-processed-gene-0.181-mRNA-1	A0A183LCG8	A0A183LCG8|A0A183LCG8_9TREM_Histone_H3_OS=Schistosoma_margrebowiei_OX=48269_GN=SMRZ_LOCUS1493_PE=3_SV=1	5.67	1.94	4.82	T0+T5+T10	0	0	0	ND.	--	--	--	--	--	--
augustus_masked-scaffold10x_377_pilon-processed-gene-0.182-mRNA-1	A0A504YHG3	A0A504YHG3|A0A504YHG3_FASGI_Histone_H2A_OS=Fasciola_gigantica_OX=46835_GN=FGIG_02583_PE=3_SV=1	0	2.68	4.94	T5+T10	0	0	0	ND.	--	5.08618	--	--	--	--
augustus_masked-scaffold10x_377_pilon-processed-gene-0.185-mRNA-1	A0A4E0RFT8	A0A4E0RFT8|A0A4E0RFT8_FASHE_Neural_Wiskott-Aldrich_syndrome_protein_OS=Fasciola_hepatica_OX=6192_GN=D915_003795_PE=4_SV=1	27	53.43	54.58	T0+T5+T10	0	0	0	ND.	--	--	--	--	--	--
augustus_masked-scaffold10x_377_pilon-processed-gene-0.188-mRNA-1	A0A2H1CQG2	A0A2H1CQG2|A0A2H1CQG2_FASHE_Myosin_tail_OS=Fasciola_hepatica_OX=6192_GN=D915_001853_PE=4_SV=1	0.06	0	0	T0	0	0	0	ND.	--	--	--	--	--	--
augustus_masked-scaffold10x_377_pilon-processed-gene-0.192-mRNA-1	A0A504Z174	A0A504Z174|A0A504Z174_FASGI_U4/U6,U5_tri-snRNP-associated_protein_1_OS=Fasciola_gigantica_OX=46835_GN=FGIG_08071_PE=4_SV=1	5.39	11.16	19.69	T0+T5+T10	0	0	0	ND.	0.709266	0.929862	--	--	--	--
augustus_masked-scaffold10x_390_pilon-processed-gene-0.33-mRNA-1	A0A504Z0R9	A0A504Z0R9|A0A504Z0R9_FASGI_Slc4a-3_(Fragment)_OS=Fasciola_gigantica_OX=46835_GN=FGIG_05425_PE=4_SV=1	1.3	2.44	4.74	T0+T5+T10	0	0	0	ND.	--	1.07418	--	--	--	--
augustus_masked-scaffold10x_391_pilon-processed-gene-0.45-mRNA-1	A0A504Y9P3	A0A504Y9P3|A0A504Y9P3_FASGI_Major_vault_protein_isoform_X1_OS=Fasciola_gigantica_OX=46835_GN=FGIG_01701_PE=4_SV=1	52.01	59.16	51.26	T0+T5+T10	2.8	31.19	0	T0+T5	--	-0.774552	--	--	--	-4.88361
augustus_masked-scaffold10x_40_pilon-processed-gene-0.14-mRNA-1	A0A4E0RXH8	A0A4E0RXH8|A0A4E0RXH8_FASHE_Copper-transporting_ATPase_2_OS=Fasciola_hepatica_OX=6192_GN=D915_008064_PE=4_SV=1	5.55	2.96	2.31	T0+T5+T10	43.48	28.55	0	T0+T5	-1.20155	-1.96301	--	--	--	--
augustus_masked-scaffold10x_418_pilon-processed-gene-0.9-mRNA-1	A0A4E0R740	A0A4E0R740|A0A4E0R740_FASHE_Putative_reticulocalbin_calumenin_dna_supercoiling_factor_OS=Fasciola_hepatica_OX=6192_GN=D915_004870_PE=4_SV=1	239.41	231.34	248.11	T0+T5+T10	280.7	249.73	340.45	T0+T5+T10	-0.434736	-0.573879	--	--	--	0.826048
augustus_masked-scaffold10x_421_pilon-processed-gene-0.36-mRNA-1	A0A4E0RUC0	A0A4E0RUC0|A0A4E0RUC0_FASHE_ATP-dependent_RNA_helicase_abstrakt_OS=Fasciola_hepatica_OX=6192_GN=D915_008561_PE=3_SV=1	10.94	23.19	26.92	T0+T5+T10	0	0	0	ND.	0.766722	0.694379	--	--	--	--
augustus_masked-scaffold10x_431_pilon-processed-gene-0.60-mRNA-1	A0A4S2LC66	A0A4S2LC66|A0A4S2LC66_OPIFE_PLAT_domain-containing_protein_OS=Opisthorchis_felineus_OX=147828_GN=CRM22_008668_PE=4_SV=1	17.96	9.62	5.54	T0+T5+T10	0	0	0	ND.	-1.25184	-2.33496	-1.01996	--	--	--
augustus_masked-scaffold10x_431_pilon-processed-gene-0.61-mRNA-1	A0A504YJV4	A0A504YJV4|A0A504YJV4_FASGI_Kinesin_protein_OS=Fasciola_gigantica_OX=46835_GN=FGIG_01011_PE=3_SV=1	5.98	4.43	1.93	T0+T5+T10	0	0	0	ND.	--	-2.14311	-1.36428	--	--	--
augustus_masked-scaffold10x_432_pilon-processed-gene-0.156-mRNA-1	A0A4E0R4L5	A0A4E0R4L5|A0A4E0R4L5_FASHE_Putative_cytochrome_C_oxidase_assembly_protein_cox11_OS=Fasciola_hepatica_OX=6192_GN=D915_007654_PE=4_SV=1	0.64	1.53	1.03	T0+T5+T10	0	0	0	ND.	--	--	--	--	--	--
augustus_masked-scaffold10x_432_pilon-processed-gene-0.157-mRNA-1	A0A2H1C596	A0A2H1C596|A0A2H1C596_FASHE_39S_ribosomal_protein_L23_OS=Fasciola_hepatica_OX=6192_GN=D915_006717_PE=4_SV=1	11.8	23.61	22.2	T0+T5+T10	0	0	0	ND.	--	--	--	--	--	--
augustus_masked-scaffold10x_436_pilon-processed-gene-0.80-mRNA-1	A0A504YWU3	A0A504YWU3|A0A504YWU3_FASGI_Poly(U)-binding-splicing_factor_PUF60_OS=Fasciola_gigantica_OX=46835_GN=FGIG_10224_PE=4_SV=1	77.73	80.45	70.03	T0+T5+T10	0	0	0	ND.	--	-0.735581	--	--	--	--
augustus_masked-scaffold10x_436_pilon-processed-gene-0.81-mRNA-1	A0A4E0RFZ0	A0A4E0RFZ0|A0A4E0RFZ0_FASHE_Pre-mRNA-splicing_factor_SLU7_OS=Fasciola_hepatica_OX=6192_GN=D915_002609_PE=4_SV=1	14.64	70.53	86.37	T0+T5+T10	0	0	0	ND.	1.76167	1.79071	--	--	--	--
augustus_masked-scaffold10x_440_pilon-processed-gene-0.27-mRNA-1	A0A4E0R536	A0A4E0R536|A0A4E0R536_FASHE_Enkurin_domain-containing_protein_OS=Fasciola_hepatica_OX=6192_GN=D915_007771_PE=4_SV=1	1.3	0.17	0	T0+T5	0	0	0	ND.	--	-3.67888	--	--	--	--
augustus_masked-scaffold10x_443_pilon-processed-gene-0.7-mRNA-1	A0A4E0RK62	A0A4E0RK62|A0A4E0RK62_FASHE_Myotubularin_protein_5_OS=Fasciola_hepatica_OX=6192_GN=D915_002640_PE=4_SV=1	1.8	4.6	5.2	T0+T5+T10	0	0	0	ND.	0.871477	0.848673	--	--	--	--
augustus_masked-scaffold10x_457_pilon-processed-gene-0.38-mRNA-1	A0A2H1C1S1	A0A2H1C1S1|A0A2H1C1S1_FASHE_Kinase_domain_protein_OS=Fasciola_hepatica_OX=6192_GN=D915_007838_PE=3_SV=1	0.26	1.92	2.02	T0+T5+T10	0	0	0	ND.	--	--	--	--	--	--
augustus_masked-scaffold10x_469_pilon-processed-gene-0.37-mRNA-1	A0A4E0S244	A0A4E0S244|A0A4E0S244_FASHE_Serine_rich_repeat_protein_OS=Fasciola_hepatica_OX=6192_GN=D915_001884_PE=4_SV=1	4.1	9.51	14.78	T0+T5+T10	0	0	0	ND.	0.837563	0.980904	--	--	--	--
augustus_masked-scaffold10x_471_pilon-processed-gene-0.3-mRNA-1	A0A2H1C110	A0A2H1C110|A0A2H1C110_FASHE_RRM_domain-containing_protein_OS=Fasciola_hepatica_OX=6192_GN=D915_12723_PE=4_SV=1	6.53	8.02	6.94	T0+T5+T10	0	0	0	ND.	--	--	--	--	--	--
augustus_masked-scaffold10x_474_pilon-processed-gene-0.52-mRNA-1	A0A183AHE6	A0A183AHE6|A0A183AHE6_9TREM_Tubulin_alpha_chain_OS=Echinostoma_caproni_OX=27848_GN=ECPE_LOCUS6381_PE=3_SV=1	63.82	93.46	160.95	T0+T5+T10	0	0	0	ND.	--	0.788633	--	--	--	--
augustus_masked-scaffold10x_477_pilon-processed-gene-0.55-mRNA-1	A0A504Z270	A0A504Z270|A0A504Z270_FASGI_Actin-related_protein_2/3_complex_subunit_5_OS=Fasciola_gigantica_OX=46835_GN=FGIG_02850_PE=3_SV=1	44.31	36.88	50.74	T0+T5+T10	0	10.56	0	T5	-0.683808	-0.653489	--	--	--	--
augustus_masked-scaffold10x_477_pilon-processed-gene-0.56-mRNA-1	A0A504YKY0	A0A504YKY0|A0A504YKY0_FASGI_Putative_RNA-binding_protein_Raly_OS=Fasciola_gigantica_OX=46835_GN=FGIG_08632_PE=4_SV=1	32.95	76	65.99	T0+T5+T10	0	0	0	ND.	0.751996	0.581182	--	--	--	--
augustus_masked-scaffold10x_483_pilon-processed-gene-0.1-mRNA-1	A0A4E0RY49	A0A4E0RY49|A0A4E0RY49_FASHE_Anillin_domain-containing_protein_OS=Fasciola_hepatica_OX=6192_GN=D915_000549_PE=4_SV=1	0.04	0.1	0.1	T0+T5+T10	0	0	0	ND.	--	--	--	--	--	--
augustus_masked-scaffold10x_487_pilon-processed-gene-0.51-mRNA-1	no hit	no hit	0	0	0	ND.	494.22	106.35	176.58	T0+T5+T10	--	--	--	--	--	--
augustus_masked-scaffold10x_493_pilon-processed-gene-1.204-mRNA-1	A0A504YLU9	A0A504YLU9|A0A504YLU9_FASGI_Calponin-homology_(CH)_domain-containing_protein_OS=Fasciola_gigantica_OX=46835_GN=FGIG_01848_PE=4_SV=1	0.2	0	0.26	T0+T10	0	0	0	ND.	--	--	--	--	--	--
augustus_masked-scaffold10x_494_pilon-processed-gene-0.26-mRNA-1	A0A2H1C4V8	A0A2H1C4V8|A0A2H1C4V8_FASHE_IQ_and_ubiquitin_domain-containing_protein_OS=Fasciola_hepatica_OX=6192_GN=D915_006738_PE=4_SV=1	1.81	0.18	0.17	T0+T5+T10	0	0	0	ND.	-3.14418	-2.84323	--	--	--	--
augustus_masked-scaffold10x_508_pilon-processed-gene-0.13-mRNA-1	A0A4E0RVF7	A0A4E0RVF7|A0A4E0RVF7_FASHE_PAX-interacting_protein_OS=Fasciola_hepatica_OX=6192_GN=D915_003885_PE=4_SV=1	1.07	4.16	2.03	T0+T5+T10	0	0	0	ND.	--	--	--	--	--	--
augustus_masked-scaffold10x_508_pilon-processed-gene-0.15-mRNA-1	A0A2H1BW82	A0A2H1BW82|A0A2H1BW82_FASHE_EXOSC1_domain-containing_protein_OS=Fasciola_hepatica_OX=6192_GN=D915_13762_PE=4_SV=1	0.34	0.92	0	T0+T5	0	0	0	ND.	--	--	--	--	--	--
augustus_masked-scaffold10x_520_pilon-processed-gene-0.106-mRNA-1	no hit	no hit	0.49	0.17	0.4	T0+T5+T10	0	0	0	ND.	--	--	--	--	--	--
augustus_masked-scaffold10x_546_pilon-processed-gene-0.151-mRNA-1	A0A4E0RCL2	A0A4E0RCL2|A0A4E0RCL2_FASHE_A4_EXTRA_domain-containing_protein_OS=Fasciola_hepatica_OX=6192_GN=D915_010221_PE=4_SV=1	10.75	7.82	9.47	T0+T5+T10	0	0	0	ND.	-0.831863	-0.912156	--	--	--	--
augustus_masked-scaffold10x_56_pilon-processed-gene-0.12-mRNA-1	A0A4E0R8W7	A0A4E0R8W7|A0A4E0R8W7_FASHE_Tektin-2_isoform_B_OS=Fasciola_hepatica_OX=6192_GN=D915_006121_PE=4_SV=1	1.19	1.74	0	T0+T5	484.46	96.38	555.02	T0+T5+T10	--	-4.41208	--	--	--	3.04024
augustus_masked-scaffold10x_56_pilon-processed-gene-0.9-mRNA-1	A0A2H1BZ21	A0A2H1BZ21|A0A2H1BZ21_FASHE_Growth_arrest_and_DNA_damage-inducible_proteins-interacting_protein_1_OS=Fasciola_hepatica_OX=6192_GN=D915_008469_PE=4_SV=1	3.3	1.51	4.56	T0+T5+T10	0	0	0	ND.	--	--	--	--	--	--
augustus_masked-scaffold10x_561_pilon-processed-gene-0.39-mRNA-1	A0A5J4NSV6	A0A5J4NSV6|A0A5J4NSV6_9TREM_Dynein_intermediate_chain,_cytosolic_OS=Paragonimus_westermani_OX=34504_GN=DEA37_0013357_PE=4_SV=1	13.08	20.26	38.17	T0+T5+T10	0	0	0	ND.	--	0.772457	--	--	--	--
augustus_masked-scaffold10x_58_pilon-processed-gene-0.1-mRNA-1	A0A4E0S3D6	A0A4E0S3D6|A0A4E0S3D6_FASHE_Alpha_subunit_of_casein_kinase_II_OS=Fasciola_hepatica_OX=6192_GN=D915_000427_PE=3_SV=1	276.68	275.13	229.17	T0+T5+T10	67.89	120.1	27.03	T0+T5+T10	-0.449792	-0.851224	--	--	--	-1.32106
augustus_masked-scaffold10x_589_pilon-processed-gene-0.14-mRNA-1	A0A504YQM3	A0A504YQM3|A0A504YQM3_FASGI_Serine/threonine-protein_phosphatase_OS=Fasciola_gigantica_OX=46835_GN=FGIG_04172_PE=3_SV=1	2.27	2.56	2.23	T0+T5+T10	0	0	0	ND.	--	--	--	--	--	--
augustus_masked-scaffold10x_589_pilon-processed-gene-0.6-mRNA-1	A0A504YJ70	A0A504YJ70|A0A504YJ70_FASGI_KN_motif_and_ankyrin_repeat_domain-containing_protein_OS=Fasciola_gigantica_OX=46835_GN=FGIG_00321_PE=4_SV=1	1.67	2	1.73	T0+T5+T10	0	0	0	ND.	--	--	--	--	--	--
augustus_masked-scaffold10x_598_pilon-processed-gene-1.201-mRNA-1	B0RZ77	B0RZ77|B0RZ77_FASHE_Tubulin_beta_chain_OS=Fasciola_hepatica_OX=6192_GN=beta-tub2_PE=2_SV=1	117.12	189.75	200.5	T0+T5+T10	45.9	52.17	0	T0+T5	--	--	--	--	--	--
augustus_masked-scaffold10x_602_pilon-processed-gene-0.103-mRNA-1	A0A4E0RU07	A0A4E0RU07|A0A4E0RU07_FASHE_Filamin-A_OS=Fasciola_hepatica_OX=6192_GN=D915_004146_PE=4_SV=1	0.04	3.31	5.34	T0+T5+T10	0	0	0	ND.	4.88387	5.36269	--	--	--	--
augustus_masked-scaffold10x_602_pilon-processed-gene-0.106-mRNA-1	A0A4E0RZK3	A0A4E0RZK3|A0A4E0RZK3_FASHE_RWD_domain-containing_protein_1_OS=Fasciola_hepatica_OX=6192_GN=D915_006486_PE=4_SV=1	23.45	33.77	49.16	T0+T5+T10	0	0	0	ND.	--	--	--	--	--	--
augustus_masked-scaffold10x_602_pilon-processed-gene-0.108-mRNA-1	A0A4E0QZC9	A0A4E0QZC9|A0A4E0QZC9_FASHE_DUF3677_domain-containing_protein_OS=Fasciola_hepatica_OX=6192_GN=D915_008746_PE=4_SV=1	0.18	0	0	T0	0	0	0	ND.	--	--	--	--	--	--
augustus_masked-scaffold10x_609_pilon-processed-gene-0.38-mRNA-1	A0A4E0RC07	A0A4E0RC07|A0A4E0RC07_FASHE_Zinc_finger_CCHC_domain-containing_protein_2_OS=Fasciola_hepatica_OX=6192_GN=D915_005211_PE=4_SV=1	4.08	25.32	17.23	T0+T5+T10	0	0	0	ND.	2.06104	1.55463	--	--	--	--
augustus_masked-scaffold10x_61_pilon-processed-gene-0.125-mRNA-1	A0A4E0RJB0	A0A4E0RJB0|A0A4E0RJB0_FASHE_Solute_carrier_family_13_(Sodium-dependent_dicarboxylate_transporter)_member_2/3/5_OS=Fasciola_hepatica_OX=6192_GN=D915_001454_PE=4_SV=1	39.1	34.62	26.51	T0+T5+T10	0	0	0	ND.	--	-1.19827	-0.647684	--	--	--
augustus_masked-scaffold10x_61_pilon-processed-gene-0.129-mRNA-1	no hit	no hit	0	0.36	0.08	T5+T10	0	0	0	ND.	5.71067	--	--	--	--	--
augustus_masked-scaffold10x_62_pilon-processed-gene-0.25-mRNA-1	A0A4E0S0A4	A0A4E0S0A4|A0A4E0S0A4_FASHE_ERC_protein_2_OS=Fasciola_hepatica_OX=6192_GN=D915_003647_PE=4_SV=1	0.09	0	0	T0	0	0	0	ND.	--	--	--	--	--	--
augustus_masked-scaffold10x_631_pilon-processed-gene-0.95-mRNA-1	A0A2H1CIW3	A0A2H1CIW3|A0A2H1CIW3_FASHE_Pectinesterase_inhibitor_domain_protein_OS=Fasciola_hepatica_OX=6192_GN=D915_05296_PE=4_SV=1	0.06	0.38	0	T0+T5	0	0	0	ND.	--	--	--	--	--	--
augustus_masked-scaffold10x_632_pilon-processed-gene-0.37-mRNA-1	A0A4E0RBQ4	A0A4E0RBQ4|A0A4E0RBQ4_FASHE_TAOK3_OS=Fasciola_hepatica_OX=6192_GN=D915_004606_PE=4_SV=1	12.57	23.16	23.9	T0+T5+T10	0	0	0	ND.	--	--	--	--	--	--
augustus_masked-scaffold10x_64_pilon-processed-gene-0.32-mRNA-1	A0A504YED2	A0A504YED2|A0A504YED2_FASGI_Kinesin-associated_protein_3_OS=Fasciola_gigantica_OX=46835_GN=FGIG_01523_PE=4_SV=1	3.29	0.66	0.53	T0+T5+T10	0	0	0	ND.	-1.9961	-3.27631	--	--	--	--
augustus_masked-scaffold10x_644_pilon-processed-gene-0.21-mRNA-1	A0A4E0QV47	A0A4E0QV47|A0A4E0QV47_FASHE_Small_nuclear_ribonucleoprotein_U1_subunit_70_OS=Fasciola_hepatica_OX=6192_GN=D915_010402_PE=4_SV=1	8.62	10.91	6.34	T0+T5+T10	0	0	0	ND.	--	-1.11139	--	--	--	--
augustus_masked-scaffold10x_7_pilon-processed-gene-1.50-mRNA-1	A0A504YZG9	A0A504YZG9|A0A504YZG9_FASGI_RNA_polymerase_II-associated_factor_1_OS=Fasciola_gigantica_OX=46835_GN=FGIG_05927_PE=4_SV=1	33.76	66.52	90.04	T0+T5+T10	0	0	0	ND.	0.689733	0.615102	--	--	--	--
augustus_masked-scaffold10x_7_pilon-processed-gene-1.51-mRNA-1	A0A4E0RSD0	A0A4E0RSD0|A0A4E0RSD0_FASHE_Putative_ribosome_biogenesis_protein_tsr1_(20S_rRNA_accumulation_protein_1)_OS=Fasciola_hepatica_OX=6192_GN=D915_005193_PE=4_SV=1	10.08	35.58	35.92	T0+T5+T10	0	0	0	ND.	1.27419	1.22877	--	--	--	--
augustus_masked-scaffold10x_7_pilon-processed-gene-1.54-mRNA-1	A0A4E0RIL2	A0A4E0RIL2|A0A4E0RIL2_FASHE_Transcription_factor_25_OS=Fasciola_hepatica_OX=6192_GN=D915_008155_PE=4_SV=1	43.48	52.08	66.76	T0+T5+T10	0	0	0	ND.	--	--	--	--	--	--
augustus_masked-scaffold10x_703_pilon-processed-gene-0.16-mRNA-1	A0A2H1BSL7	A0A2H1BSL7|A0A2H1BSL7_FASHE_Dorsal_switch_protein_1_OS=Fasciola_hepatica_OX=6192_GN=D915_010882_PE=4_SV=1	9.93	15.32	25.7	T0+T5+T10	0	0	0	ND.	--	--	--	--	--	--
augustus_masked-scaffold10x_71_pilon-processed-gene-0.134-mRNA-1	A0A4E0S2U8	A0A4E0S2U8|A0A4E0S2U8_FASHE_Neuroglian_OS=Fasciola_hepatica_OX=6192_GN=D915_001179_PE=4_SV=1	0.16	0.45	1.42	T0+T5+T10	0	0	0	ND.	--	2.16224	--	--	--	--
augustus_masked-scaffold10x_71_pilon-processed-gene-0.137-mRNA-1	A0A2H1BYZ2	A0A2H1BYZ2|A0A2H1BYZ2_FASHE_Ubiquitin_conjugating_enzyme_OS=Fasciola_hepatica_OX=6192_GN=D915_008536_PE=3_SV=1	0.45	11	19.76	T0+T5+T10	0	0	0	ND.	--	3.11021	--	--	--	--
augustus_masked-scaffold10x_712_pilon-processed-gene-0.52-mRNA-1	A0A504YR14	A0A504YR14|A0A504YR14_FASGI_CEP209_CC5_domain-containing_protein_OS=Fasciola_gigantica_OX=46835_GN=FGIG_10446_PE=4_SV=1	0.18	0	0.2	T0+T10	0	0	0	ND.	--	--	--	--	--	--
augustus_masked-scaffold10x_735_pilon-processed-gene-0.25-mRNA-1	A0A4E0RXM4	A0A4E0RXM4|A0A4E0RXM4_FASHE_Rassf1_OS=Fasciola_hepatica_OX=6192_GN=D915_000968_PE=4_SV=1	0.95	3.94	2.89	T0+T5+T10	0	0	0	ND.	1.65074	--	--	--	--	--
augustus_masked-scaffold10x_737_pilon-processed-gene-0.19-mRNA-1	A0A4E0RSI3	A0A4E0RSI3|A0A4E0RSI3_FASHE_Serine/threonine_kinase_OS=Fasciola_hepatica_OX=6192_GN=D915_009313_PE=4_SV=1	87.04	189.11	181.35	T0+T5+T10	0	0	0	ND.	0.720402	--	--	--	--	--
augustus_masked-scaffold10x_749_pilon-processed-gene-0.43-mRNA-1	A0A419Q225	A0A419Q225|A0A419Q225_CLOSI_MAGUK_p55_subfamily_member_7_OS=Clonorchis_sinensis_OX=79923_GN=Mpp7_PE=3_SV=1	3.92	6.52	5.6	T0+T5+T10	0	0	0	ND.	--	--	--	--	--	--
augustus_masked-scaffold10x_774_pilon-processed-gene-0.37-mRNA-1	A0A4E0RZE5	A0A4E0RZE5|A0A4E0RZE5_FASHE_Coiled-coil_domain-containing_protein_OS=Fasciola_hepatica_OX=6192_GN=D915_006785_PE=4_SV=1	5.52	16.79	19.52	T0+T5+T10	0	0	0	ND.	1.20863	1.00255	--	--	--	--
augustus_masked-scaffold10x_784_pilon-processed-gene-0.33-mRNA-1	A0A504YPN0	A0A504YPN0|A0A504YPN0_FASGI_Chaperonin_containing_T-complex_polypeptide_subunit_zeta_OS=Fasciola_gigantica_OX=46835_GN=FGIG_03371_PE=3_SV=1	431.45	642.62	1007.55	T0+T5+T10	481.32	771.32	404.62	T0+T5+T10	--	--	--	--	--	--
augustus_masked-scaffold10x_784_pilon-processed-gene-0.34-mRNA-1	A0A4S2L3E9	A0A4S2L3E9|A0A4S2L3E9_OPIFE_CSN8_PSD8_EIF3K_domain-containing_protein_OS=Opisthorchis_felineus_OX=147828_GN=CRM22_010508_PE=4_SV=1	78.12	111.48	117.64	T0+T5+T10	0	0	0	ND.	--	--	--	--	--	--
augustus_masked-scaffold10x_785_pilon-processed-gene-0.0-mRNA-1	A0A2H1C7Z0	A0A2H1C7Z0|A0A2H1C7Z0_FASHE_Kinesin-like_protein_OS=Fasciola_hepatica_OX=6192_GN=D915_006797_PE=3_SV=1	0.18	0	0	T0	0	0	0	ND.	--	--	--	--	--	--
augustus_masked-scaffold10x_794_pilon-processed-gene-0.102-mRNA-1	A0A504Y829	A0A504Y829|A0A504Y829_FASGI_Guanine_nucleotide-binding_protein_alpha-15_subunit_OS=Fasciola_gigantica_OX=46835_GN=FGIG_04792_PE=4_SV=1	0	0	0.28	T10	0	0	0	ND.	--	--	--	--	--	--
augustus_masked-scaffold10x_80_pilon-processed-gene-0.151-mRNA-1	A0A4E0RID1	A0A4E0RID1|A0A4E0RID1_FASHE_DNA_repair_protein_RAD51_homolog_OS=Fasciola_hepatica_OX=6192_GN=D915_003490_PE=3_SV=1	11.52	23.9	34.11	T0+T5+T10	0	0	0	ND.	0.6234	0.639795	--	--	--	--
augustus_masked-scaffold10x_802_pilon-processed-gene-0.53-mRNA-1	A0A183ASQ4	A0A183ASQ4|A0A183ASQ4_9TREM_LID_domain-containing_protein_OS=Echinostoma_caproni_OX=27848_PE=4_SV=1	1.61	4.78	7.24	T0+T5+T10	0	0	0	ND.	--	1.21297	--	--	--	--
augustus_masked-scaffold10x_815_pilon-processed-gene-1.64-mRNA-1	no hit	no hit	46.69	181.7	273.77	T0+T5+T10	0	0	0	ND.	1.50434	1.68922	--	--	--	--
augustus_masked-scaffold10x_839_pilon-processed-gene-0.13-mRNA-1	A0A074Z759	A0A074Z759|A0A074Z759_9TREM_Reverse_transcriptase_domain-containing_protein_(Fragment)_OS=Opisthorchis_viverrini_OX=6198_GN=T265_14748_PE=4_SV=1	18.75	51.38	65.74	T0+T5+T10	0	0	0	ND.	1.11286	0.942334	--	--	--	--
augustus_masked-scaffold10x_886_pilon-processed-gene-0.13-mRNA-1	A0A2H1C2Z6	A0A2H1C2Z6|A0A2H1C2Z6_FASHE_WD_domain,_G-beta_repeat_protein_OS=Fasciola_hepatica_OX=6192_GN=D915_11272_PE=4_SV=1	0.67	1.42	0.58	T0+T5+T10	0	0	0	ND.	--	--	--	--	--	--
augustus_masked-scaffold10x_894_pilon-processed-gene-0.93-mRNA-1	A0A4E0R5K4	A0A4E0R5K4|A0A4E0R5K4_FASHE_Suppressor_of_hairy_wing_OS=Fasciola_hepatica_OX=6192_GN=D915_006654_PE=4_SV=1	0.26	1.19	1.65	T0+T5+T10	0	0	0	ND.	--	--	--	--	--	--
augustus_masked-scaffold10x_894_pilon-processed-gene-0.95-mRNA-1	A0A2H1CMS6	A0A2H1CMS6|A0A2H1CMS6_FASHE_Aamy_domain-containing_protein_OS=Fasciola_hepatica_OX=6192_GN=D915_002680_PE=4_SV=1	3.67	8.32	12.76	T0+T5+T10	0	0	0	ND.	--	--	--	--	--	--
augustus_masked-scaffold10x_896_pilon-processed-gene-0.25-mRNA-1	A0A4E0S0Q5	A0A4E0S0Q5|A0A4E0S0Q5_FASHE_DUF2428_domain-containing_protein_OS=Fasciola_hepatica_OX=6192_GN=D915_000082_PE=4_SV=1	2.99	4.27	6.95	T0+T5+T10	0	0	0	ND.	--	--	--	--	--	--
augustus_masked-scaffold10x_908_pilon-processed-gene-1.187-mRNA-1	A0A4E0RYF1	A0A4E0RYF1|A0A4E0RYF1_FASHE_Dystrophin_OS=Fasciola_hepatica_OX=6192_GN=D915_001753_PE=4_SV=1	0.78	1.05	0.98	T0+T5+T10	0	0	0	ND.	--	--	--	--	--	--
augustus_masked-scaffold10x_93_pilon-processed-gene-0.25-mRNA-1	G4LZ89	G4LZ89|G4LZ89_SCHMA_Cement_protein_3B_variant_1,_putative_OS=Schistosoma_mansoni_OX=6183_GN=Smp_158630_PE=4_SV=1	24.09	38.15	52.05	T0+T5+T10	0	0	0	ND.	--	--	--	--	--	--
augustus_masked-scaffold10x_93_pilon-processed-gene-0.26-mRNA-1	no hit	no hit	193.58	120.83	88.71	T0+T5+T10	72.67	265.75	0	T0+T5	-0.827176	-1.52222	--	--	-4.96636	-5.83484
augustus_masked-scaffold10x_933_pilon-processed-gene-0.131-mRNA-1	A0A504YKY5	A0A504YKY5|A0A504YKY5_FASGI_Apoptosis-inducing_factor_1_mitochondrial_OS=Fasciola_gigantica_OX=46835_GN=FGIG_08455_PE=4_SV=1	0	1.8	2.22	T5+T10	0	0	0	ND.	--	--	--	--	--	--
augustus_masked-scaffold10x_947_pilon-processed-gene-0.6-mRNA-1	A0A504YJJ2	A0A504YJJ2|A0A504YJJ2_FASGI_Ribosome_biogenesis_protein_MAK21_OS=Fasciola_gigantica_OX=46835_GN=FGIG_06732_PE=4_SV=1	7.86	7.71	9.85	T0+T5+T10	0	0	0	ND.	--	--	--	--	--	--
augustus_masked-scaffold10x_95_pilon-processed-gene-0.14-mRNA-1	A0A4E0R5V4	A0A4E0R5V4|A0A4E0R5V4_FASHE_Speckle-type_POZ_protein_OS=Fasciola_hepatica_OX=6192_GN=D915_008340_PE=4_SV=1	15.22	8.38	13.96	T0+T5+T10	0	0	0	ND.	--	-0.961933	--	--	--	--
augustus_masked-scaffold10x_958_pilon-processed-gene-0.19-mRNA-1	A0A4E0RFC7	A0A4E0RFC7|A0A4E0RFC7_FASHE_Coatomer_subunit_beta_OS=Fasciola_hepatica_OX=6192_GN=D915_003805_PE=4_SV=1	4.43	7.11	7.27	T0+T5+T10	30.53	92.87	27.49	T0+T5+T10	--	--	--	--	--	--
augustus_masked-scaffold10x_99_pilon-processed-gene-0.196-mRNA-1	A0A504YG42	A0A504YG42|A0A504YG42_FASGI_Heat_shock_protein_heat_shock_protein_90_alpha_OS=Fasciola_gigantica_OX=46835_GN=FGIG_08056_PE=3_SV=1	246.61	199.33	132.42	T0+T5+T10	8197.45	8607.77	7448.26	T0+T5+T10	-0.676778	-1.24146	--	--	--	--
augustus_masked-scaffold10x_99_pilon-processed-gene-0.197-mRNA-1	A0A4E0RKB7	A0A4E0RKB7|A0A4E0RKB7_FASHE_Lysine-specific_demethylase_3B_OS=Fasciola_hepatica_OX=6192_GN=D915_000875_PE=4_SV=1	0.08	0.05	0	T0+T5	0	0	0	ND.	--	--	--	--	--	--
augustus_masked-scaffold10x_99_pilon-processed-gene-0.207-mRNA-1	A0A4E0R0U0	A0A4E0R0U0|A0A4E0R0U0_FASHE_Heat_shock_protein_heat_shock_protein_90_alpha_OS=Fasciola_hepatica_OX=6192_GN=D915_007964_PE=3_SV=1	239	224.89	213.16	T0+T5+T10	80.87	170.53	159.3	T0+T5+T10	-0.459153	-0.788667	--	--	--	--
maker-scaffold10x_1_pilon-augustus-gene-0.125-mRNA-1	A0A4S2KVQ6	A0A4S2KVQ6|A0A4S2KVQ6_OPIFE_Nicotinate_phosphoribosyltransferase_OS=Opisthorchis_felineus_OX=147828_GN=CRM22_010667_PE=3_SV=1	27.36	31.5	28.45	T0+T5+T10	0	0	0	ND.	--	-0.531046	--	--	--	--
maker-scaffold10x_1_pilon-augustus-gene-0.126-mRNA-1	A0A504YPD4	A0A504YPD4|A0A504YPD4_FASGI_Elongation_factor_1_delta_OS=Fasciola_gigantica_OX=46835_GN=FGIG_04678_PE=4_SV=1	378.53	386.17	402.61	T0+T5+T10	1314	1088.18	991.21	T0+T5+T10	-0.448795	-0.51348	--	--	--	--
maker-scaffold10x_1_pilon-augustus-gene-0.130-mRNA-1	A0A2H1C0J9	A0A2H1C0J9|A0A2H1C0J9_FASHE_Leishmanolysin-like_peptidase_(Fragment)_OS=Fasciola_hepatica_OX=6192_GN=D915_12167_PE=3_SV=1	0.48	1.26	0.71	T0+T5+T10	0	0	0	ND.	--	--	--	--	--	--
maker-scaffold10x_1_pilon-augustus-gene-0.132-mRNA-1	A0A2H1CQS9	A0A2H1CQS9|A0A2H1CQS9_FASHE_Flavin_reductase_OS=Fasciola_hepatica_OX=6192_GN=D915_001722_PE=4_SV=1	23	19.82	9.19	T0+T5+T10	0	0	0	ND.	--	-1.90169	--	--	--	--
maker-scaffold10x_1_pilon-augustus-gene-0.133-mRNA-1	A0A4E0S2B1	A0A4E0S2B1|A0A4E0S2B1_FASHE_Self-incompatibility_associated_ribonuclease_OS=Fasciola_hepatica_OX=6192_GN=D915_001720_PE=3_SV=1	5.32	4.25	22.97	T0+T5+T10	0	0	0	ND.	--	1.73574	2.09434	--	--	--
maker-scaffold10x_1_pilon-augustus-gene-0.136-mRNA-1	A0A4E0RSV5	A0A4E0RSV5|A0A4E0RSV5_FASHE_Calpain-2_catalytic_subunit_OS=Fasciola_hepatica_OX=6192_GN=D915_005511_PE=3_SV=1	12.59	3.99	4.82	T0+T5+T10	201.18	143.52	86.42	T0+T5+T10	-1.67877	-2.08679	--	--	--	--
maker-scaffold10x_1_pilon-augustus-gene-0.144-mRNA-1	A0A4E0RLC8	A0A4E0RLC8|A0A4E0RLC8_FASHE_C3H1-type_domain-containing_protein_OS=Fasciola_hepatica_OX=6192_GN=D915_001719_PE=4_SV=1	3141.7	1972.75	1030.91	T0+T5+T10	164.68	117.27	204.31	T0+T5+T10	-1.10556	-2.03082	-0.863289	--	--	--
maker-scaffold10x_1_pilon-snap-gene-0.148-mRNA-1	A0A2H1CNE7	A0A2H1CNE7|A0A2H1CNE7_FASHE_Protein_yippee_OS=Fasciola_hepatica_OX=6192_GN=D915_002668_PE=4_SV=1	13.12	20.99	17.13	T0+T5+T10	0	0	0	ND.	--	--	--	--	--	--
maker-scaffold10x_1_pilon-snap-gene-0.152-mRNA-1	no hit	no hit	21.57	22.33	20.63	T0+T5+T10	0	0	0	ND.	--	-0.609777	--	--	--	--
maker-scaffold10x_1_pilon-snap-gene-0.154-mRNA-1	A0A504YEB3	A0A504YEB3|A0A504YEB3_FASGI_Transcription_initiation_factor_TFIIA_large_subunit_OS=Fasciola_gigantica_OX=46835_GN=FGIG_03726_PE=4_SV=1	23.12	50.48	46.2	T0+T5+T10	0	0	0	ND.	--	--	--	--	--	--
maker-scaffold10x_1_pilon-snap-gene-0.157-mRNA-1	A0A2H1CGC5	A0A2H1CGC5|A0A2H1CGC5_FASHE_ABC_transporter,_ATP-binding_protein_OS=Fasciola_hepatica_OX=6192_GN=D915_07034_PE=4_SV=1	4.9	6.28	3.57	T0+T5+T10	0	0	0	ND.	--	-1.25565	-1.08951	--	--	--
maker-scaffold10x_1_pilon-snap-gene-0.160-mRNA-1	A0A4E0RD28	A0A4E0RD28|A0A4E0RD28_FASHE_Activated_CDC42_kinase_1_OS=Fasciola_hepatica_OX=6192_GN=D915_004466_PE=3_SV=1	9.87	18.76	16.61	T0+T5+T10	0	0	0	ND.	--	--	--	--	--	--
maker-scaffold10x_1_pilon-snap-gene-0.165-mRNA-1	A0A4E0S3G7	A0A4E0S3G7|A0A4E0S3G7_FASHE_Propionyl-CoA_carboxylase_alpha_chain_OS=Fasciola_hepatica_OX=6192_GN=D915_001718_PE=4_SV=1	332.59	300.07	245.19	T0+T5+T10	2110.93	2223.96	1870.98	T0+T5+T10	-0.505128	-1.16974	-0.5998	--	--	--
maker-scaffold10x_10_pilon-snap-gene-0.0-mRNA-1	A0A4E0RNR9	A0A4E0RNR9|A0A4E0RNR9_FASHE_Small_GTP-binding_protein_Rab1_OS=Fasciola_hepatica_OX=6192_GN=D915_006540_PE=4_SV=1	504.81	446.68	459.1	T0+T5+T10	329.76	366.28	271.3	T0+T5+T10	-0.637321	-0.914264	--	--	--	--
maker-scaffold10x_100_pilon-snap-gene-0.0-mRNA-1	A0A4E0RWM1	A0A4E0RWM1|A0A4E0RWM1_FASHE_DUF3715_domain-containing_protein_OS=Fasciola_hepatica_OX=6192_GN=D915_006531_PE=4_SV=1	3.41	8.71	7.98	T0+T5+T10	0	0	0	ND.	--	--	--	--	--	--
maker-scaffold10x_100_pilon-snap-gene-0.1-mRNA-1	A0A2H1CQW6	A0A2H1CQW6|A0A2H1CQW6_FASHE_Lig_chan-Glu_bd_domain-containing_protein_OS=Fasciola_hepatica_OX=6192_GN=D915_02621_PE=4_SV=1	0.08	0	0	T0	0	0	0	ND.	--	--	--	--	--	--
maker-scaffold10x_100_pilon-snap-gene-0.2-mRNA-1	A0A4E0RIW4	A0A4E0RIW4|A0A4E0RIW4_FASHE_Putative_ring_finger_protein_OS=Fasciola_hepatica_OX=6192_GN=D915_001789_PE=4_SV=1	0.52	0	0.13	T0+T10	0	0	0	ND.	--	--	--	--	--	--
maker-scaffold10x_100_pilon-snap-gene-0.3-mRNA-1	A0A4E0RZA9	A0A4E0RZA9|A0A4E0RZA9_FASHE_Homeobox_domain-containing_protein_OS=Fasciola_hepatica_OX=6192_GN=D915_004519_PE=4_SV=1	0	0	1.13	T10	0	0	0	ND.	--	6.27497	--	--	--	--
maker-scaffold10x_100_pilon-snap-gene-0.4-mRNA-1	A0A4E0RE70	A0A4E0RE70|A0A4E0RE70_FASHE_GTP-binding_protein_1_OS=Fasciola_hepatica_OX=6192_GN=D915_004521_PE=4_SV=1	96.03	124.86	105.1	T0+T5+T10	0	0	0	ND.	--	-0.637286	--	--	--	--
maker-scaffold10x_100_pilon-snap-gene-0.5-mRNA-1	A0A4E0R8Y5	A0A4E0R8Y5|A0A4E0R8Y5_FASHE_Putative_Dual_specificity_mitogen-activated_protein_kinase_kinase_(Fragment)_OS=Fasciola_hepatica_OX=6192_GN=D915_006530_PE=4_SV=1	7.96	12.02	11.83	T0+T5+T10	0	0	0	ND.	--	--	--	--	--	--
maker-scaffold10x_100_pilon-snap-gene-0.6-mRNA-1	A0A4E0RHZ5	A0A4E0RHZ5|A0A4E0RHZ5_FASHE_F-box_domain-containing_protein_OS=Fasciola_hepatica_OX=6192_GN=D915_001790_PE=4_SV=1	4.79	7.57	11.93	T0+T5+T10	0	0	0	ND.	--	0.609894	--	--	--	--
maker-scaffold10x_1000_pilon-augustus-gene-0.7-mRNA-1	A0A4E0RUB8	A0A4E0RUB8|A0A4E0RUB8_FASHE_HTH_La-type_RNA-binding_domain-containing_protein_OS=Fasciola_hepatica_OX=6192_GN=D915_003830_PE=4_SV=1	4.42	3.26	2.72	T0+T5+T10	0	0	0	ND.	--	-1.27221	--	--	--	--
maker-scaffold10x_1000_pilon-snap-gene-0.2-mRNA-1	A0A504YM64	A0A504YM64|A0A504YM64_FASGI_Rna_rnp_complex-1-interacting_phosphatase_OS=Fasciola_gigantica_OX=46835_GN=FGIG_08135_PE=4_SV=1	31.55	52.9	44.86	T0+T5+T10	0	0	0	ND.	--	--	--	--	--	--
maker-scaffold10x_1005_pilon-snap-gene-0.0-mRNA-1	A0A3R7CD58	A0A3R7CD58|A0A3R7CD58_CLOSI_Spectrin_beta_chain_(Fragment)_OS=Clonorchis_sinensis_OX=79923_GN=Sptbn1_PE=4_SV=1	0.39	0	0	T0	0	0	0	ND.	--	--	--	--	--	--
maker-scaffold10x_1006_pilon-augustus-gene-0.3-mRNA-1	A0A4E0RLR4	A0A4E0RLR4|A0A4E0RLR4_FASHE_Ribosomal_protein_S6_kinase_OS=Fasciola_hepatica_OX=6192_GN=D915_000217_PE=4_SV=1	2.6	5.14	1.7	T0+T5+T10	0	0	0	ND.	--	--	--	--	--	--
maker-scaffold10x_1006_pilon-augustus-gene-0.6-mRNA-1	A0A4E0RB07	A0A4E0RB07|A0A4E0RB07_FASHE_Chromodomain-helicase-DNA-binding_protein_3_OS=Fasciola_hepatica_OX=6192_GN=D915_005738_PE=4_SV=1	6.16	16.59	20.65	T0+T5+T10	0	0	0	ND.	1.14795	1.07836	--	--	--	--
maker-scaffold10x_1006_pilon-augustus-gene-0.7-mRNA-1	A0A2H1CIA3	A0A2H1CIA3|A0A2H1CIA3_FASHE_Fcf2_pre-rRNA_processing_OS=Fasciola_hepatica_OX=6192_GN=D915_06149_PE=4_SV=1	27.46	23.26	31.38	T0+T5+T10	0	0	0	ND.	-0.553112	-0.47922	--	--	--	--
maker-scaffold10x_1006_pilon-augustus-gene-0.9-mRNA-1	G7YPT8	G7YPT8|G7YPT8_CLOSI_Teneurin-4_OS=Clonorchis_sinensis_OX=79923_GN=CLF_106271_PE=4_SV=1	0	0	0.03	T10	0	0	0	ND.	--	--	--	--	--	--
maker-scaffold10x_1006_pilon-snap-gene-0.67-mRNA-1	A0A504Z113	A0A504Z113|A0A504Z113_FASGI_26S_proteasome_non-ATPase_regulatory_subunit_OS=Fasciola_gigantica_OX=46835_GN=FGIG_12102_PE=4_SV=1	108.82	135.67	183.79	T0+T5+T10	10.6	34.6	0	T0+T5	--	--	--	--	--	-3.93643
maker-scaffold10x_1006_pilon-snap-gene-0.68-mRNA-1	A0A2H1CWV0	A0A2H1CWV0|A0A2H1CWV0_FASHE_Growth-Arrest-Specific_Protein_2_domain_protein_OS=Fasciola_hepatica_OX=6192_GN=D915_00355_PE=4_SV=1	10.19	19.2	21.04	T0+T5+T10	0	0	0	ND.	--	--	--	--	--	--
maker-scaffold10x_1006_pilon-snap-gene-0.70-mRNA-1	A0A4E0RFB8	A0A4E0RFB8|A0A4E0RFB8_FASHE_Methyltransferase-like_protein_OS=Fasciola_hepatica_OX=6192_GN=D915_003976_PE=3_SV=1	0.23	0.55	0.69	T0+T5+T10	0	0	0	ND.	--	--	--	--	--	--
maker-scaffold10x_1006_pilon-snap-gene-0.71-mRNA-1	no hit	no hit	0	0.07	0	T5	0	0	0	ND.	--	--	--	--	--	--
maker-scaffold10x_1006_pilon-snap-gene-0.76-mRNA-1	A0A2H1C8M7	A0A2H1C8M7|A0A2H1C8M7_FASHE_EF_hand_OS=Fasciola_hepatica_OX=6192_GN=D915_09163_PE=4_SV=1	0.14	1.21	0	T0+T5	0	0	0	ND.	--	--	--	--	--	--
maker-scaffold10x_1006_pilon-snap-gene-0.77-mRNA-1	A0A504Z1Q4	A0A504Z1Q4|A0A504Z1Q4_FASGI_Sestrin_OS=Fasciola_gigantica_OX=46835_GN=FGIG_00252_PE=4_SV=1	7.92	7.59	13.42	T0+T5+T10	0	0	0	ND.	--	--	0.800034	--	--	--
maker-scaffold10x_1007_pilon-augustus-gene-0.78-mRNA-1	A0A4E0R010	A0A4E0R010|A0A4E0R010_FASHE_Ubiquitin_modifier-activating_enzyme_5_OS=Fasciola_hepatica_OX=6192_GN=D915_009125_PE=4_SV=1	0	0	0	ND.	37.94	133.92	0	T0+T5	--	--	--	--	--	--
maker-scaffold10x_1007_pilon-augustus-gene-0.79-mRNA-1	A0A2H1CQQ2	A0A2H1CQQ2|A0A2H1CQQ2_FASHE_V-type_proton_ATPase_subunit_G_(Fragment)_OS=Fasciola_hepatica_OX=6192_GN=D915_02752_PE=3_SV=1	765.35	738.48	911.95	T0+T5+T10	0	54.71	0	T5	-0.44977	-0.56401	--	--	--	--
maker-scaffold10x_1007_pilon-augustus-gene-0.81-mRNA-1	A0A4E0RYR2	A0A4E0RYR2|A0A4E0RYR2_FASHE_Putative_cytoplasmic_polyadenylation_element_binding_protein_(Cpeb)_OS=Fasciola_hepatica_OX=6192_GN=D915_007570_PE=4_SV=1	304.95	169.84	231.04	T0+T5+T10	0	0	0	ND.	-1.39711	-1.09815	--	--	--	--
maker-scaffold10x_1007_pilon-augustus-gene-0.83-mRNA-1	A0A4E0R8U2	A0A4E0R8U2|A0A4E0R8U2_FASHE_Tumor_protein_p63-regulated_gene_1_protein_OS=Fasciola_hepatica_OX=6192_GN=D915_004212_PE=4_SV=1	0.36	1.72	1.6	T0+T5+T10	0	0	0	ND.	--	--	--	--	--	--
maker-scaffold10x_1007_pilon-augustus-gene-0.84-mRNA-1	A0A504YI51	A0A504YI51|A0A504YI51_FASGI_Sodium:potassium_dependent_atpase_beta_subunit_OS=Fasciola_gigantica_OX=46835_GN=FGIG_05875_PE=4_SV=1	0.76	5	8.95	T0+T5+T10	0	0	0	ND.	--	3.13176	--	--	--	--
maker-scaffold10x_1007_pilon-augustus-gene-0.86-mRNA-1	A0A4E0QZE5	A0A4E0QZE5|A0A4E0QZE5_FASHE_Ubiquitin_modifier-activating_enzyme_5_OS=Fasciola_hepatica_OX=6192_GN=D915_010354_PE=4_SV=1	11.2	21.17	29.38	T0+T5+T10	0	0	0	ND.	--	0.668914	--	--	--	--
maker-scaffold10x_1007_pilon-augustus-gene-0.92-mRNA-1	A0A4E0RUR9	A0A4E0RUR9|A0A4E0RUR9_FASHE_AP-3_complex_subunit_mu-1_OS=Fasciola_hepatica_OX=6192_GN=D915_003438_PE=3_SV=1	16.65	13.64	26.8	T0+T5+T10	0	0	0	ND.	--	--	--	--	--	--
maker-scaffold10x_1007_pilon-pred_gff_StringTie-gene-0.30-mRNA-1	G7YWN6	G7YWN6|G7YWN6_CLOSI_CCHC-type_domain-containing_protein_OS=Clonorchis_sinensis_OX=79923_GN=CLF_100774_PE=4_SV=1	3.8	5.2	7.66	T0+T5+T10	0	0	0	ND.	--	--	--	--	--	--
maker-scaffold10x_1007_pilon-snap-gene-0.0-mRNA-1	A0A4E0S0W6	A0A4E0S0W6|A0A4E0S0W6_FASHE_IQ_domain-containing_protein_G_OS=Fasciola_hepatica_OX=6192_GN=D915_005372_PE=4_SV=1	1.6	0.58	0.17	T0+T5+T10	0	0	0	ND.	--	-2.89185	--	--	--	--
maker-scaffold10x_1007_pilon-snap-gene-0.12-mRNA-1	A0A4E0RW58	A0A4E0RW58|A0A4E0RW58_FASHE_Atlastin_GTPase_1_OS=Fasciola_hepatica_OX=6192_GN=D915_007139_PE=4_SV=1	24.82	47.22	72.19	T0+T5+T10	0	31.4	0	T5	--	0.731209	--	--	--	--
maker-scaffold10x_1007_pilon-snap-gene-0.14-mRNA-1	A0A4E0RKG2	A0A4E0RKG2|A0A4E0RKG2_FASHE_Dynein_light_chain_1_axonemal_OS=Fasciola_hepatica_OX=6192_GN=D915_007568_PE=4_SV=1	2.65	3.23	5.12	T0+T5+T10	0	0	0	ND.	--	--	--	--	--	--
maker-scaffold10x_1007_pilon-snap-gene-0.16-mRNA-1	A0A4E0RZF5	A0A4E0RZF5|A0A4E0RZF5_FASHE_Solute_carrier_family_27_(Fatty_acid_transporter)_member_1/4_OS=Fasciola_hepatica_OX=6192_GN=D915_006414_PE=4_SV=1	190.23	126.62	106.79	T0+T5+T10	0	0	0	ND.	-0.964527	-1.54685	--	--	--	--
maker-scaffold10x_1007_pilon-snap-gene-0.17-mRNA-1	no hit	no hit	0.43	0	0	T0	1220.38	211.66	476.68	T0+T5+T10	--	--	--	-2.95272	--	--
maker-scaffold10x_1007_pilon-snap-gene-0.6-mRNA-1	A0A4E0S1U7	A0A4E0S1U7|A0A4E0S1U7_FASHE_Vacuolar_protein_sorting-associated_protein_52_OS=Fasciola_hepatica_OX=6192_GN=D915_004213_PE=4_SV=1	3.99	9.3	15.5	T0+T5+T10	0	0	0	ND.	1.13359	1.68924	--	--	--	--
maker-scaffold10x_1007_pilon-snap-gene-0.9-mRNA-1	A0A4E0RW88	A0A4E0RW88|A0A4E0RW88_FASHE_Alpha-mannosidase_OS=Fasciola_hepatica_OX=6192_GN=D915_003437_PE=3_SV=1	0	0.95	18.75	T5+T10	0	0	0	ND.	--	10.2789	--	--	--	--
maker-scaffold10x_1008_pilon-snap-gene-0.3-mRNA-1	A0A183AFF4	A0A183AFF4|A0A183AFF4_9TREM_PH_domain-containing_protein_OS=Echinostoma_caproni_OX=27848_GN=ECPE_LOCUS5689_PE=4_SV=1	3.13	2.46	1.3	T0+T5+T10	0	0	0	ND.	--	-1.94933	--	--	--	--
maker-scaffold10x_101_pilon-pred_gff_StringTie-gene-0.9-mRNA-1	A0A075A4Y5	A0A075A4Y5|A0A075A4Y5_9TREM_Integrase_catalytic_domain-containing_protein_OS=Opisthorchis_viverrini_OX=6198_GN=T265_09435_PE=4_SV=1	0	1.38	0	T5	0	0	0	ND.	--	--	--	--	--	--
maker-scaffold10x_101_pilon-snap-gene-0.4-mRNA-1	no hit	no hit	24.56	45.24	67.67	T0+T5+T10	0	0	0	ND.	--	0.683671	--	--	--	--
maker-scaffold10x_101_pilon-snap-gene-0.5-mRNA-1	A0A2H1BT31	A0A2H1BT31|A0A2H1BT31_FASHE_RNA-binding_motif_protein_X-linked_OS=Fasciola_hepatica_OX=6192_GN=D915_010580_PE=4_SV=1	0.1	2.1	2.41	T0+T5+T10	0	0	0	ND.	--	3.01313	--	--	--	--
maker-scaffold10x_1010_pilon-augustus-gene-0.18-mRNA-1	A0A504XSV4	A0A504XSV4|A0A504XSV4_FASGI_Transmembrane_protein_OS=Fasciola_gigantica_OX=46835_GN=FGIG_06373_PE=4_SV=1	26.67	44.73	55.15	T0+T5+T10	0	0	0	ND.	--	--	--	--	--	--
maker-scaffold10x_1010_pilon-augustus-gene-0.20-mRNA-1	A0A4E0RIW9	A0A4E0RIW9|A0A4E0RIW9_FASHE_alpha-1,2-Mannosidase_OS=Fasciola_hepatica_OX=6192_GN=D915_002754_PE=3_SV=1	0	0	0.06	T10	0	0	0	ND.	--	--	--	--	--	--
maker-scaffold10x_1010_pilon-augustus-gene-0.25-mRNA-1	A0A4E0RWY6	A0A4E0RWY6|A0A4E0RWY6_FASHE_Ubiquitin_thioesterase_OTU1_OS=Fasciola_hepatica_OX=6192_GN=D915_002618_PE=4_SV=1	23.21	28.59	29.26	T0+T5+T10	0	0	0	ND.	--	--	--	--	--	--
maker-scaffold10x_1010_pilon-augustus-gene-0.28-mRNA-1	A0A183AL47	A0A183AL47|A0A183AL47_9TREM_ABC1_domain-containing_protein_OS=Echinostoma_caproni_OX=27848_GN=ECPE_LOCUS7682_PE=4_SV=1	82.28	122.19	181.61	T0+T5+T10	0	0	0	ND.	--	--	--	--	--	--
maker-scaffold10x_1010_pilon-pred_gff_StringTie-gene-0.79-mRNA-1	A0A2H1CLP7	A0A2H1CLP7|A0A2H1CLP7_FASHE_ADP-ribosylation_factor_OS=Fasciola_hepatica_OX=6192_GN=D915_002755_PE=3_SV=1	0.66	0.56	0.56	T0+T5+T10	0	0	0	ND.	--	-1.10578	--	--	--	--
maker-scaffold10x_1010_pilon-snap-gene-0.100-mRNA-1	no hit	no hit	0	0.12	0	T5	0	0	0	ND.	--	--	--	--	--	--
maker-scaffold10x_1010_pilon-snap-gene-0.102-mRNA-1	A0A4Z2D7T8	A0A4Z2D7T8|A0A4Z2D7T8_SCHJA_Integrin_OS=Schistosoma_japonicum_OX=6182_GN=EWB00_003639_PE=3_SV=1	0.32	0.12	0.56	T0+T5+T10	0	0	0	ND.	--	--	--	--	--	--
maker-scaffold10x_1010_pilon-snap-gene-0.104-mRNA-1	A0A504YKL6	A0A504YKL6|A0A504YKL6_FASGI_Beta-galactosidase_OS=Fasciola_gigantica_OX=46835_GN=FGIG_08659_PE=3_SV=1	2.23	0.52	0.77	T0+T5+T10	0	0	0	ND.	--	-2.53954	--	--	--	--
maker-scaffold10x_1010_pilon-snap-gene-0.105-mRNA-1	A0A2H1BUR4	A0A2H1BUR4|A0A2H1BUR4_FASHE_DNA_mismatch_repair_protein_MLH3_OS=Fasciola_hepatica_OX=6192_GN=D915_009754_PE=4_SV=1	2.22	2.75	1.56	T0+T5+T10	0	0	0	ND.	--	--	--	--	--	--
maker-scaffold10x_1010_pilon-snap-gene-0.106-mRNA-1	A0A4E0RC12	A0A4E0RC12|A0A4E0RC12_FASHE_Exosome_component_10_OS=Fasciola_hepatica_OX=6192_GN=D915_005446_PE=4_SV=1	9.25	12.53	15.61	T0+T5+T10	0	0	0	ND.	--	--	--	--	--	--
maker-scaffold10x_1010_pilon-snap-gene-0.107-mRNA-1	no hit	no hit	0.78	2.64	9.67	T0+T5+T10	0	0	0	ND.	--	3.13503	--	--	--	--
maker-scaffold10x_1010_pilon-snap-gene-0.108-mRNA-1	A0A4E0R0D0	A0A4E0R0D0|A0A4E0R0D0_FASHE_ABC_domain_containing_protein_kinase_OS=Fasciola_hepatica_OX=6192_GN=D915_007949_PE=4_SV=1	39.22	43.76	71.89	T0+T5+T10	0	0	0	ND.	--	--	--	--	--	--
maker-scaffold10x_1010_pilon-snap-gene-0.91-mRNA-1	A0A4E0R083	A0A4E0R083|A0A4E0R083_FASHE_Glycogenin-1_OS=Fasciola_hepatica_OX=6192_GN=D915_007816_PE=4_SV=1	18.47	9.8	10.89	T0+T5+T10	15.72	107.77	12.08	T0+T5+T10	-1.29218	-1.38849	--	--	--	-2.22216
maker-scaffold10x_1010_pilon-snap-gene-0.92-mRNA-1	A0A504Z3Y6	A0A504Z3Y6|A0A504Z3Y6_FASGI_Putative_gtp-binding_protein_hflx_(Fragment)_OS=Fasciola_gigantica_OX=46835_GN=FGIG_11462_PE=4_SV=1	6.5	22.4	33.39	T0+T5+T10	0	0	0	ND.	1.31452	1.64291	--	--	--	--
maker-scaffold10x_1010_pilon-snap-gene-0.93-mRNA-1	A0A504YMY3	A0A504YMY3|A0A504YMY3_FASGI_Importin_7_OS=Fasciola_gigantica_OX=46835_GN=FGIG_06236_PE=4_SV=1	44.79	81.93	79.36	T0+T5+T10	16.06	34.53	25.86	T0+T5+T10	0.503594	--	--	--	--	--
maker-scaffold10x_1013_pilon-augustus-gene-0.100-mRNA-1	A0A5K4F690	A0A5K4F690|A0A5K4F690_SCHMA_ANK_REP_REGION_domain-containing_protein_OS=Schistosoma_mansoni_OX=6183_PE=4_SV=1	7.45	2.53	0.85	T0+T5+T10	0	0	0	ND.	-2.13376	-4.06249	-1.8638	--	--	--
maker-scaffold10x_1013_pilon-augustus-gene-0.86-mRNA-1	A0A4E0R4J9	A0A4E0R4J9|A0A4E0R4J9_FASHE_Retinoid_X_receptor_OS=Fasciola_hepatica_OX=6192_GN=D915_005819_PE=3_SV=1	3.13	9.04	9.06	T0+T5+T10	0	0	0	ND.	1.14469	1.04581	--	--	--	--
maker-scaffold10x_1013_pilon-augustus-gene-0.96-mRNA-1	A0A4E0RWU4	A0A4E0RWU4|A0A4E0RWU4_FASHE_Putative_phospholipid-transporting_ATPase_IF_OS=Fasciola_hepatica_OX=6192_GN=D915_009301_PE=4_SV=1	11.04	14.26	20.27	T0+T5+T10	0	0	0	ND.	--	--	--	--	--	--
maker-scaffold10x_1013_pilon-augustus-gene-0.98-mRNA-1	A0A4E0RHP9	A0A4E0RHP9|A0A4E0RHP9_FASHE_Solute_carrier_family_25_member_(Fragment)_OS=Fasciola_hepatica_OX=6192_GN=D915_002190_PE=3_SV=1	84.74	82.07	74.92	T0+T5+T10	0	0	0	ND.	-0.468475	-0.964791	--	--	--	--
maker-scaffold10x_1013_pilon-snap-gene-0.111-mRNA-1	A0A4E0R1I2	A0A4E0R1I2|A0A4E0R1I2_FASHE_Transcription_initiation_factor_TFIID_subunit_6_OS=Fasciola_hepatica_OX=6192_GN=D915_009408_PE=4_SV=1	5.72	0.21	1	T0+T5+T10	0	0	0	ND.	--	-2.97649	--	--	--	--
maker-scaffold10x_1013_pilon-snap-gene-0.112-mRNA-1	A0A4E0RMV4	A0A4E0RMV4|A0A4E0RMV4_FASHE_Cyclic_nucleotide_gated_cation_channel_OS=Fasciola_hepatica_OX=6192_GN=D915_002191_PE=4_SV=1	2.56	1.57	1.08	T0+T5+T10	0	0	0	ND.	--	-1.80174	--	--	--	--
maker-scaffold10x_1013_pilon-snap-gene-0.113-mRNA-1	A0A4E0S2Q5	A0A4E0S2Q5|A0A4E0S2Q5_FASHE_Dual_specificity_mitogen-activated_protein_kinase_kinase_mek-2_OS=Fasciola_hepatica_OX=6192_GN=D915_001287_PE=4_SV=1	4.25	2.25	1.2	T0+T5+T10	0	23.2	0	T5	--	-2.58509	--	3.23754	--	-3.23754
maker-scaffold10x_1013_pilon-snap-gene-0.115-mRNA-1	A0A2H1CM61	A0A2H1CM61|A0A2H1CM61_FASHE_Nucleosome_assembly_protein_OS=Fasciola_hepatica_OX=6192_GN=D915_002687_PE=3_SV=1	834.63	1667.06	3157.57	T0+T5+T10	643.57	665.59	881.27	T0+T5+T10	0.709785	1.0736	--	--	--	0.972924
maker-scaffold10x_1013_pilon-snap-gene-0.116-mRNA-1	A0A4E0RDP9	A0A4E0RDP9|A0A4E0RDP9_FASHE_Transcription_initiation_factor_TFIIF_subunit_beta_OS=Fasciola_hepatica_OX=6192_GN=D915_009280_PE=4_SV=1	11.82	16.12	25.66	T0+T5+T10	0	0	0	ND.	--	--	--	--	--	--
maker-scaffold10x_1013_pilon-snap-gene-0.117-mRNA-1	A0A4E0RHP3	A0A4E0RHP3|A0A4E0RHP3_FASHE_Importin_subunit_alpha_OS=Fasciola_hepatica_OX=6192_GN=D915_001801_PE=3_SV=1	50.55	45.65	69.39	T0+T5+T10	0	39.85	0	T5	--	--	--	--	--	--
maker-scaffold10x_1013_pilon-snap-gene-0.118-mRNA-1	no hit	no hit	0.19	0	2.11	T0+T10	0	0	0	ND.	--	2.98226	--	--	--	--
maker-scaffold10x_1013_pilon-snap-gene-0.119-mRNA-1	A0A4E0RI17	A0A4E0RI17|A0A4E0RI17_FASHE_RNA_polymerase_II_subunit_A_C-terminal_domain_phosphatase_OS=Fasciola_hepatica_OX=6192_GN=D915_002239_PE=4_SV=1	12.62	27.58	29.04	T0+T5+T10	0	0	0	ND.	0.703809	--	--	--	--	--
maker-scaffold10x_1013_pilon-snap-gene-0.121-mRNA-1	A0A4E0R875	A0A4E0R875|A0A4E0R875_FASHE_E3_ubiquitin-protein_ligase_pellino_OS=Fasciola_hepatica_OX=6192_GN=D915_006464_PE=4_SV=1	0.48	0	0	T0	0	0	0	ND.	--	--	--	--	--	--
maker-scaffold10x_1013_pilon-snap-gene-0.125-mRNA-1	no hit	no hit	2.26	3.04	4.49	T0+T5+T10	0	0	0	ND.	--	--	--	--	--	--
maker-scaffold10x_1013_pilon-snap-gene-0.127-mRNA-1	A0A4E0RIP6	A0A4E0RIP6|A0A4E0RIP6_FASHE_DH_domain-containing_protein_OS=Fasciola_hepatica_OX=6192_GN=D915_001291_PE=4_SV=1	0	0.1	0.03	T5+T10	0	0	0	ND.	--	--	--	--	--	--
maker-scaffold10x_1013_pilon-snap-gene-0.128-mRNA-1	A0A4E0R1R7	A0A4E0R1R7|A0A4E0R1R7_FASHE_Electron_transfer_flavoprotein_subunit_beta_OS=Fasciola_hepatica_OX=6192_GN=D915_008110_PE=3_SV=1	26.59	19.08	22.41	T0+T5+T10	0	30.19	0	T5	--	-1.13161	--	--	--	-3.39598
maker-scaffold10x_1013_pilon-snap-gene-0.130-mRNA-1	A0A5J4NJ39	A0A5J4NJ39|A0A5J4NJ39_9TREM_BTB/POZ_domain-containing_adapter_for_CUL3-mediated_RhoA_degradation_protein_OS=Paragonimus_westermani_OX=34504_GN=DEA37_0003733_PE=4_SV=1	53.14	58.45	65.18	T0+T5+T10	0	0	0	ND.	--	--	--	--	--	--
maker-scaffold10x_1013_pilon-snap-gene-0.131-mRNA-1	A0A4E0RMH0	A0A4E0RMH0|A0A4E0RMH0_FASHE_Phd_finger_protein_10_OS=Fasciola_hepatica_OX=6192_GN=D915_002238_PE=4_SV=1	44.34	40.16	37.47	T0+T5+T10	0	0	0	ND.	-0.559863	-0.862947	--	--	--	--
maker-scaffold10x_1013_pilon-snap-gene-0.133-mRNA-1	Q5DA21	Q5DA21|Q5DA21_SCHJA_Calmodulin_3b_(Phosphorylase_kinase,_delta)_OS=Schistosoma_japonicum_OX=6182_GN=calm3b_PE=2_SV=1	1509.73	1191.88	1024.37	T0+T5+T10	1193.86	1282.18	2070.17	T0+T5+T10	-0.730688	-1.16175	--	--	--	0.953378
maker-scaffold10x_1013_pilon-snap-gene-0.134-mRNA-1	A0A4E0R362	A0A4E0R362|A0A4E0R362_FASHE_ER_membrane_protein_complex_subunit_OS=Fasciola_hepatica_OX=6192_GN=D915_008658_PE=4_SV=1	27.65	29.34	25.24	T0+T5+T10	0	0	0	ND.	--	-0.791027	--	--	--	--
maker-scaffold10x_1013_pilon-snap-gene-0.135-mRNA-1	A0A504YTU4	A0A504YTU4|A0A504YTU4_FASGI_Retrovirus_Pol_polyprotein_from_transposon_17,6_OS=Fasciola_gigantica_OX=46835_GN=FGIG_05301_PE=4_SV=1	7.25	8.47	9.04	T0+T5+T10	0	0	0	ND.	--	--	--	--	--	--
maker-scaffold10x_1014_pilon-augustus-gene-0.42-mRNA-1	A0A4E0REW1	A0A4E0REW1|A0A4E0REW1_FASHE_Phosphatase_and_actin_regulator_OS=Fasciola_hepatica_OX=6192_GN=D915_003058_PE=4_SV=1	2.17	1.65	4.42	T0+T5+T10	0	0	0	ND.	--	--	--	--	--	--
maker-scaffold10x_1014_pilon-snap-gene-0.18-mRNA-1	no hit	no hit	200.6	144.25	223.82	T0+T5+T10	0	0	0	ND.	-1.04101	-0.6851	--	--	--	--
maker-scaffold10x_1014_pilon-snap-gene-0.19-mRNA-1	A0A419QHG2	A0A419QHG2|A0A419QHG2_CLOSI_Serine/threonine-protein_phosphatase_6_regulatory_subunit_2_OS=Clonorchis_sinensis_OX=79923_GN=Ppp6r2_PE=4_SV=1	0.36	0.93	0.12	T0+T5+T10	0	0	0	ND.	--	--	--	--	--	--
maker-scaffold10x_1014_pilon-snap-gene-0.20-mRNA-1	A0A504Z1I7	A0A504Z1I7|A0A504Z1I7_FASGI_WW_domain-containing_protein_OS=Fasciola_gigantica_OX=46835_GN=FGIG_08022_PE=4_SV=1	64.1	104.11	179.9	T0+T5+T10	0	0	0	ND.	--	0.600498	--	--	--	--
maker-scaffold10x_1014_pilon-snap-gene-0.22-mRNA-1	A0A504Z1U2	A0A504Z1U2|A0A504Z1U2_FASGI_Sorting_nexin-14_OS=Fasciola_gigantica_OX=46835_GN=FGIG_03672_PE=4_SV=1	59.51	54.57	30.29	T0+T5+T10	0	0	0	ND.	-0.446523	-1.17916	--	--	--	--
maker-scaffold10x_1014_pilon-snap-gene-0.26-mRNA-1	Q5C6K4	Q5C6K4|Q5C6K4_SCHJA_SJCHGC06375_protein_(Fragment)_OS=Schistosoma_japonicum_OX=6182_PE=2_SV=2	14.06	20.96	28.03	T0+T5+T10	0	0	0	ND.	--	--	--	--	--	--
maker-scaffold10x_1014_pilon-snap-gene-0.28-mRNA-1	A0A4E0RK94	A0A4E0RK94|A0A4E0RK94_FASHE_ADP-ribosylation_factor-binding_protein_GGA3_OS=Fasciola_hepatica_OX=6192_GN=D915_007370_PE=4_SV=1	22.26	32.07	24.32	T0+T5+T10	0	6.35	0	T5	--	--	--	--	--	-2.71576
maker-scaffold10x_1014_pilon-snap-gene-0.29-mRNA-1	A0A4E0RPJ7	A0A4E0RPJ7|A0A4E0RPJ7_FASHE_BHLH_domain-containing_protein_OS=Fasciola_hepatica_OX=6192_GN=D915_006639_PE=4_SV=1	1.61	6.73	3.34	T0+T5+T10	0	0	0	ND.	--	--	--	--	--	--
maker-scaffold10x_1014_pilon-snap-gene-0.30-mRNA-1	no hit	no hit	1.17	0.25	0	T0+T5	0	0	0	ND.	--	--	--	--	--	--
maker-scaffold10x_1014_pilon-snap-gene-0.31-mRNA-1	A0A4E0RHL0	A0A4E0RHL0|A0A4E0RHL0_FASHE_IRS-type_PTB_domain-containing_protein_OS=Fasciola_hepatica_OX=6192_GN=D915_003023_PE=4_SV=1	1.99	2.58	2.04	T0+T5+T10	0	0	0	ND.	--	--	--	--	--	--
maker-scaffold10x_1017_pilon-augustus-gene-0.44-mRNA-1	A0A2H1CCI4	A0A2H1CCI4|A0A2H1CCI4_FASHE_Deoxyhypusine_synthase_OS=Fasciola_hepatica_OX=6192_GN=D915_005333_PE=4_SV=1	1.76	2.42	1.83	T0+T5+T10	0	0	0	ND.	--	--	--	--	--	--
maker-scaffold10x_1017_pilon-pred_gff_StringTie-gene-0.81-mRNA-1	A0A2H1CED0	A0A2H1CED0|A0A2H1CED0_FASHE_Eukaryotic_translation_initiation_factor_5A_OS=Fasciola_hepatica_OX=6192_GN=D915_06927_PE=3_SV=1	0.32	0.29	0.19	T0+T5+T10	1710.75	2505.31	2050.74	T0+T5+T10	--	--	--	--	--	--
maker-scaffold10x_1017_pilon-snap-gene-0.10-mRNA-1	A0A4E0R0C6	A0A4E0R0C6|A0A4E0R0C6_FASHE_F5/8_type_C_domain-containing_protein_OS=Fasciola_hepatica_OX=6192_GN=D915_008669_PE=4_SV=1	1.41	0.93	0.35	T0+T5+T10	0	0	0	ND.	--	-2.79395	--	--	--	--
maker-scaffold10x_1017_pilon-snap-gene-0.11-mRNA-1	A0A504Y7X0	A0A504Y7X0|A0A504Y7X0_FASGI_Purple_acid_phosphatase_OS=Fasciola_gigantica_OX=46835_GN=FGIG_09745_PE=3_SV=1	2	0.8	0.87	T0+T5+T10	0	0	0	ND.	-1.6275	-1.90485	--	--	--	--
maker-scaffold10x_1017_pilon-snap-gene-0.13-mRNA-1	A0A4E0RS77	A0A4E0RS77|A0A4E0RS77_FASHE_c-SKI_SMAD_bind_domain-containing_protein_OS=Fasciola_hepatica_OX=6192_GN=D915_000113_PE=4_SV=1	0.79	1.16	0.95	T0+T5+T10	0	0	0	ND.	--	--	--	--	--	--
maker-scaffold10x_1017_pilon-snap-gene-0.14-mRNA-1	A0A4E0S3K6	A0A4E0S3K6|A0A4E0S3K6_FASHE_Fibroblast_growth_factor_receptor_1_OS=Fasciola_hepatica_OX=6192_GN=D915_000111_PE=4_SV=1	0	0.08	4.29	T5+T10	0	0	0	ND.	--	8.55775	--	--	--	--
maker-scaffold10x_1017_pilon-snap-gene-0.15-mRNA-1	no hit	no hit	11.83	13.05	7.53	T0+T5+T10	0	0	0	ND.	--	-1.4086	-1.00209	--	--	--
maker-scaffold10x_1017_pilon-snap-gene-0.17-mRNA-1	no hit	no hit	11.8	18.34	18.23	T0+T5+T10	0	0	0	ND.	--	--	--	--	--	--
maker-scaffold10x_1017_pilon-snap-gene-0.18-mRNA-1	A0A4E0R8L4	A0A4E0R8L4|A0A4E0R8L4_FASHE_Protein_transport_protein_SEC23_OS=Fasciola_hepatica_OX=6192_GN=D915_007146_PE=3_SV=1	31.82	66.96	86.48	T0+T5+T10	92.94	76.26	73.13	T0+T5+T10	0.585926	0.652125	--	--	--	--
maker-scaffold10x_1017_pilon-snap-gene-0.19-mRNA-1	A0A4E0R7Y9	A0A4E0R7Y9|A0A4E0R7Y9_FASHE_Proteasome_activator_complex_subunit_3_OS=Fasciola_hepatica_OX=6192_GN=D915_007515_PE=4_SV=1	72.35	86.33	115.14	T0+T5+T10	0	23.46	0	T5	--	--	--	--	--	--
maker-scaffold10x_1017_pilon-snap-gene-0.20-mRNA-1	A0A504YVS5	A0A504YVS5|A0A504YVS5_FASGI_MORN_repeat-containing_protein_5_OS=Fasciola_gigantica_OX=46835_GN=FGIG_02892_PE=4_SV=1	505.95	555.84	821.19	T0+T5+T10	0	0	0	ND.	--	--	--	--	--	--
maker-scaffold10x_1017_pilon-snap-gene-0.21-mRNA-1	A0A504YQK0	A0A504YQK0|A0A504YQK0_FASGI_Acyl-CoA_dehydrogenase_family_member_9_mitochondrial_OS=Fasciola_gigantica_OX=46835_GN=FGIG_08652_PE=4_SV=1	9.07	16.65	15.37	T0+T5+T10	0	0	0	ND.	--	--	--	--	--	--
maker-scaffold10x_1017_pilon-snap-gene-0.22-mRNA-1	A0A4E0RAQ8	A0A4E0RAQ8|A0A4E0RAQ8_FASHE_Acyl-CoA_dehydrogenase_family_member_9_mitochondrial_OS=Fasciola_hepatica_OX=6192_GN=D915_005334_PE=4_SV=1	128.75	143.52	218.44	T0+T5+T10	0	0	0	ND.	--	--	--	--	--	--
maker-scaffold10x_1017_pilon-snap-gene-0.8-mRNA-1	no hit	no hit	0.14	0.97	1.14	T0+T5+T10	0	0	0	ND.	--	--	--	--	--	--
maker-scaffold10x_1019_pilon-augustus-gene-0.42-mRNA-1	no hit	no hit	177.3	136.59	150.06	T0+T5+T10	0	0	0	ND.	-0.840037	-1.02539	--	--	--	--
maker-scaffold10x_1019_pilon-snap-gene-0.44-mRNA-1	A0A4E0RFW0	A0A4E0RFW0|A0A4E0RFW0_FASHE_SYCP2_SLD_domain-containing_protein_OS=Fasciola_hepatica_OX=6192_GN=D915_003691_PE=4_SV=1	0.41	2.04	0.74	T0+T5+T10	0	0	0	ND.	--	--	--	--	--	--
maker-scaffold10x_1019_pilon-snap-gene-0.45-mRNA-1	A0A4E0S0D6	A0A4E0S0D6|A0A4E0S0D6_FASHE_Transmembrane_protein_56_OS=Fasciola_hepatica_OX=6192_GN=D915_003692_PE=4_SV=1	55.91	95.48	78.83	T0+T5+T10	0	0	0	ND.	--	--	--	--	--	--
maker-scaffold10x_1019_pilon-snap-gene-0.47-mRNA-1	A0A504YCP0	A0A504YCP0|A0A504YCP0_FASGI_39S_ribosomal_protein_L30_mitochondrial_OS=Fasciola_gigantica_OX=46835_GN=FGIG_10528_PE=4_SV=1	5.2	5.35	8.42	T0+T5+T10	0	0	0	ND.	--	--	--	--	--	--
maker-scaffold10x_1019_pilon-snap-gene-0.48-mRNA-1	H2KP70	H2KP70|H2KP70_CLOSI_Group_XV_phospholipase_A2_OS=Clonorchis_sinensis_OX=79923_GN=PLA2G15_PE=4_SV=1	4.37	0	0	T0	0	0	0	ND.	-3.49003	-5.15055	--	--	--	--
maker-scaffold10x_1019_pilon-snap-gene-0.50-mRNA-1	no hit	no hit	12.75	30.93	37.09	T0+T5+T10	0	0	0	ND.	0.839478	0.811444	--	--	--	--
maker-scaffold10x_1019_pilon-snap-gene-0.52-mRNA-1	no hit	no hit	0.76	0.71	0.87	T0+T5+T10	0	0	0	ND.	--	--	--	--	--	--
maker-scaffold10x_1019_pilon-snap-gene-0.53-mRNA-1	A0A2H1CH25	A0A2H1CH25|A0A2H1CH25_FASHE_7_transmembrane_receptor_OS=Fasciola_hepatica_OX=6192_GN=D915_004422_PE=3_SV=1	0	0.09	0	T5	0	0	0	ND.	--	--	--	--	--	--
maker-scaffold10x_102_pilon-augustus-gene-0.100-mRNA-1	A0A504Z2V8	A0A504Z2V8|A0A504Z2V8_FASGI_Eukaryotic_peptide_chain_release_factor_subunit_OS=Fasciola_gigantica_OX=46835_GN=FGIG_10921_PE=4_SV=1	45.63	64.72	86.92	T0+T5+T10	11.01	62.78	30.57	T0+T5+T10	--	--	--	--	--	--
maker-scaffold10x_102_pilon-augustus-gene-0.110-mRNA-1	A0A183ABI0	A0A183ABI0|A0A183ABI0_9TREM_VPS9_domain-containing_protein_OS=Echinostoma_caproni_OX=27848_GN=ECPE_LOCUS4315_PE=4_SV=1	12.41	16.46	18.8	T0+T5+T10	0	0	0	ND.	--	--	--	--	--	--
maker-scaffold10x_102_pilon-augustus-gene-0.120-mRNA-1	A0A4E0S1V9	A0A4E0S1V9|A0A4E0S1V9_FASHE_Vesicle_transport_protein_USE1_OS=Fasciola_hepatica_OX=6192_GN=D915_003935_PE=4_SV=1	32.67	43.54	61.02	T0+T5+T10	0	0	0	ND.	--	--	--	--	--	--
maker-scaffold10x_102_pilon-augustus-gene-0.76-mRNA-1	no hit	no hit	0.04	0	0	T0	0	0	0	ND.	--	--	--	--	--	--
maker-scaffold10x_102_pilon-augustus-gene-0.82-mRNA-1	A0A4E0RJR0	A0A4E0RJR0|A0A4E0RJR0_FASHE_Reticulocalbin_1_EF-hand_calcium_binding_domain_OS=Fasciola_hepatica_OX=6192_GN=D915_001611_PE=4_SV=1	0	0.51	0.59	T5+T10	0	0	0	ND.	--	--	--	--	--	--
maker-scaffold10x_102_pilon-augustus-gene-0.93-mRNA-1	A0A504YG85	A0A504YG85|A0A504YG85_FASGI_COP9_constitutive_photomorphogenic_subunit_5_OS=Fasciola_gigantica_OX=46835_GN=FGIG_08274_PE=4_SV=1	10.42	10.86	12.4	T0+T5+T10	0	0	0	ND.	--	-0.473885	--	--	--	--
maker-scaffold10x_102_pilon-augustus-gene-0.94-mRNA-1	A0A4E0RX11	A0A4E0RX11|A0A4E0RX11_FASHE_Guanylate_cyclase_domain-containing_protein_(Fragment)_OS=Fasciola_hepatica_OX=6192_GN=D915_003042_PE=3_SV=1	7.94	15.78	22.19	T0+T5+T10	0	0	0	ND.	--	--	--	--	--	--
maker-scaffold10x_102_pilon-snap-gene-0.22-mRNA-1	Q5DCM0	Q5DCM0|Q5DCM0_SCHJA_SJCHGC03722_protein_OS=Schistosoma_japonicum_OX=6182_PE=2_SV=1	26.96	26.35	37.09	T0+T5+T10	0	0	0	ND.	--	--	--	--	--	--
maker-scaffold10x_102_pilon-snap-gene-0.23-mRNA-1	A0A5J4NAN6	A0A5J4NAN6|A0A5J4NAN6_9TREM_Seipin_OS=Paragonimus_westermani_OX=34504_GN=DEA37_0014964_PE=4_SV=1	278.29	289.52	345.16	T0+T5+T10	0	0	0	ND.	--	--	--	--	--	--
maker-scaffold10x_102_pilon-snap-gene-0.24-mRNA-1	A0A4E0QX64	A0A4E0QX64|A0A4E0QX64_FASHE_Protein_phosphatase_OS=Fasciola_hepatica_OX=6192_GN=D915_009411_PE=3_SV=1	154.3	191.39	298.08	T0+T5+T10	0	0	0	ND.	--	--	--	--	--	--
maker-scaffold10x_102_pilon-snap-gene-0.25-mRNA-1	A0A504YUM2	A0A504YUM2|A0A504YUM2_FASGI_Syntaxin_OS=Fasciola_gigantica_OX=46835_GN=FGIG_09446_PE=3_SV=1	43.32	99.33	115.61	T0+T5+T10	0	0	0	ND.	0.667514	0.95166	--	--	--	--
maker-scaffold10x_102_pilon-snap-gene-0.26-mRNA-1	no hit	no hit	0.27	6.87	9.55	T0+T5+T10	0	0	0	ND.	--	3.84421	--	--	--	--
maker-scaffold10x_102_pilon-snap-gene-0.27-mRNA-1	A0A4E0REU9	A0A4E0REU9|A0A4E0REU9_FASHE_Enhancer_of_polycomb-like_protein_OS=Fasciola_hepatica_OX=6192_GN=D915_003096_PE=3_SV=1	11.91	21.17	20.99	T0+T5+T10	0	0	0	ND.	--	--	--	--	--	--
maker-scaffold10x_102_pilon-snap-gene-0.28-mRNA-1	A0A4E0RJ32	A0A4E0RJ32|A0A4E0RJ32_FASHE_alpha-1,2-Mannosidase_OS=Fasciola_hepatica_OX=6192_GN=D915_001477_PE=3_SV=1	0.57	0.45	0.43	T0+T5+T10	0	0	0	ND.	--	--	--	--	--	--
maker-scaffold10x_102_pilon-snap-gene-0.34-mRNA-1	A0A4E0S2G5	A0A4E0S2G5|A0A4E0S2G5_FASHE_Electron_transfer_flavoprotein-ubiquinone_oxidoreductase_OS=Fasciola_hepatica_OX=6192_GN=D915_001474_PE=4_SV=1	49.5	115.52	143.91	T0+T5+T10	0	0	0	ND.	0.720847	0.751224	--	--	--	--
maker-scaffold10x_102_pilon-snap-gene-0.35-mRNA-1	A0A4E0RJL8	A0A4E0RJL8|A0A4E0RJL8_FASHE_Intron-binding_protein_aquarius_OS=Fasciola_hepatica_OX=6192_GN=D915_001475_PE=4_SV=1	6.51	14.55	21.25	T0+T5+T10	0	0	0	ND.	0.821229	0.730021	--	--	--	--
maker-scaffold10x_102_pilon-snap-gene-0.37-mRNA-1	A0A4E0R2I6	A0A4E0R2I6|A0A4E0R2I6_FASHE_Cullin-1_OS=Fasciola_hepatica_OX=6192_GN=D915_008718_PE=3_SV=1	23.75	20.38	20.24	T0+T5+T10	0	0	0	ND.	-0.64254	-0.972873	--	--	--	--
maker-scaffold10x_102_pilon-snap-gene-0.38-mRNA-1	A0A4E0RF59	A0A4E0RF59|A0A4E0RF59_FASHE_Crooked_neck_pre-mRNA-splicing_factor_1_OS=Fasciola_hepatica_OX=6192_GN=D915_008857_PE=4_SV=1	5.75	9.63	13.32	T0+T5+T10	0	0	0	ND.	--	--	--	--	--	--
maker-scaffold10x_102_pilon-snap-gene-0.39-mRNA-1	A0A4E0R912	A0A4E0R912|A0A4E0R912_FASHE_FHA_domain-containing_protein_OS=Fasciola_hepatica_OX=6192_GN=D915_003934_PE=4_SV=1	0.65	0.27	0.6	T0+T5+T10	0	0	0	ND.	--	--	--	--	--	--
maker-scaffold10x_102_pilon-snap-gene-0.40-mRNA-1	A0A2H1C1D8	A0A2H1C1D8|A0A2H1C1D8_FASHE_Ribosomal_protein_S27a_OS=Fasciola_hepatica_OX=6192_GN=D915_008484_PE=4_SV=1	3990.26	4700.42	7035.15	T0+T5+T10	0	0	0	ND.	--	--	--	--	--	--
maker-scaffold10x_102_pilon-snap-gene-0.43-mRNA-1	A0A2H1CIW5	A0A2H1CIW5|A0A2H1CIW5_FASHE_CUB_domain_protein_OS=Fasciola_hepatica_OX=6192_GN=D915_05238_PE=4_SV=1	0.12	0.48	1.05	T0+T5+T10	0	0	0	ND.	--	--	--	--	--	--
maker-scaffold10x_102_pilon-snap-gene-0.44-mRNA-1	A0A4E0RX92	A0A4E0RX92|A0A4E0RX92_FASHE_Delta-like_protein_OS=Fasciola_hepatica_OX=6192_GN=D915_001336_PE=4_SV=1	0	0.14	0.54	T5+T10	0	0	0	ND.	--	5.42766	--	--	--	--
maker-scaffold10x_102_pilon-snap-gene-0.47-mRNA-1	A0A4E0RWL5	A0A4E0RWL5|A0A4E0RWL5_FASHE_CBFD_NFYB_HMF_domain-containing_protein_OS=Fasciola_hepatica_OX=6192_GN=D915_009435_PE=4_SV=1	27.22	29.54	34.52	T0+T5+T10	0	0	0	ND.	--	--	--	--	--	--
maker-scaffold10x_102_pilon-snap-gene-0.48-mRNA-1	A0A4E0QX64	A0A4E0QX64|A0A4E0QX64_FASHE_Protein_phosphatase_OS=Fasciola_hepatica_OX=6192_GN=D915_009411_PE=3_SV=1	0.1	0	0	T0	0	0	0	ND.	--	--	--	--	--	--
maker-scaffold10x_102_pilon-snap-gene-0.51-mRNA-1	G7YGW4	G7YGW4|G7YGW4_CLOSI_Cellular_myosin_heavy_chain_OS=Clonorchis_sinensis_OX=79923_GN=CLF_107581_PE=4_SV=1	0.24	0.14	0.27	T0+T5+T10	0	0	0	ND.	--	--	--	--	--	--
maker-scaffold10x_102_pilon-snap-gene-0.53-mRNA-1	A0A1S8WZH8	A0A1S8WZH8|A0A1S8WZH8_9TREM_Leucine_Rich_repeat-containing_domain_protein_OS=Opisthorchis_viverrini_OX=6198_GN=X801_04290_PE=4_SV=1	0	0.51	0.85	T5+T10	0	0	0	ND.	--	4.55802	--	--	--	--
maker-scaffold10x_102_pilon-snap-gene-0.54-mRNA-1	A0A4E0QW44	A0A4E0QW44|A0A4E0QW44_FASHE_Leucine-rich_repeat-containing_protein_OS=Fasciola_hepatica_OX=6192_GN=D915_010107_PE=4_SV=1	0.22	0	0	T0	0	0	0	ND.	--	--	--	--	--	--
maker-scaffold10x_102_pilon-snap-gene-0.56-mRNA-1	A0A4E0RWJ0	A0A4E0RWJ0|A0A4E0RWJ0_FASHE_Prospero_homeobox_protein_1_OS=Fasciola_hepatica_OX=6192_GN=D915_003258_PE=4_SV=1	0	0.69	18.42	T5+T10	0	0	0	ND.	6.88875	9.78359	--	--	--	--
maker-scaffold10x_102_pilon-snap-gene-0.57-mRNA-1	A0A4E0REF0	A0A4E0REF0|A0A4E0REF0_FASHE_Putative_adaptor_protein_numb_OS=Fasciola_hepatica_OX=6192_GN=D915_003257_PE=4_SV=1	0	0.15	0	T5	0	0	0	ND.	--	--	--	--	--	--
maker-scaffold10x_102_pilon-snap-gene-0.58-mRNA-1	A0A4E0RI63	A0A4E0RI63|A0A4E0RI63_FASHE_p21-activated_kinase_1_OS=Fasciola_hepatica_OX=6192_GN=D915_001478_PE=4_SV=1	56.85	56.56	42.22	T0+T5+T10	0	0	0	ND.	--	-1.08475	--	--	--	--
maker-scaffold10x_102_pilon-snap-gene-0.62-mRNA-1	A0A4E0QX16	A0A4E0QX16|A0A4E0QX16_FASHE_GDP-L-fucose_transporter_OS=Fasciola_hepatica_OX=6192_GN=D915_009519_PE=4_SV=1	1.41	2.01	3.45	T0+T5+T10	0	0	0	ND.	--	--	--	--	--	--
maker-scaffold10x_102_pilon-snap-gene-0.63-mRNA-1	A0A4E0RPM2	A0A4E0RPM2|A0A4E0RPM2_FASHE_Intraflagellar_transport_protein_80_OS=Fasciola_hepatica_OX=6192_GN=D915_001476_PE=4_SV=1	0.23	0.36	1.44	T0+T5+T10	0	0	0	ND.	--	2.30191	--	--	--	--
maker-scaffold10x_102_pilon-snap-gene-0.64-mRNA-1	A0A4E0S2H0	A0A4E0S2H0|A0A4E0S2H0_FASHE_Apoptotic_enhancer_1_protein_OS=Fasciola_hepatica_OX=6192_GN=D915_002963_PE=4_SV=1	4.4	6.23	5.45	T0+T5+T10	0	0	0	ND.	--	--	--	--	--	--
maker-scaffold10x_102_pilon-snap-gene-0.65-mRNA-1	A0A4E0RYH0	A0A4E0RYH0|A0A4E0RYH0_FASHE_Methionine_aminopeptidase_2_OS=Fasciola_hepatica_OX=6192_GN=D915_005509_PE=3_SV=1	32.38	26.47	32.19	T0+T5+T10	0	0	0	ND.	-0.559776	-0.587223	--	--	--	--
maker-scaffold10x_102_pilon-snap-gene-0.66-mRNA-1	A0A504Y4N5	A0A504Y4N5|A0A504Y4N5_FASGI_Transcription_initiation_factor_TFIID_subunit_3_OS=Fasciola_gigantica_OX=46835_GN=FGIG_05851_PE=4_SV=1	0.71	5.23	3.17	T0+T5+T10	0	0	0	ND.	2.31723	1.51674	--	--	--	--
maker-scaffold10x_102_pilon-snap-gene-0.68-mRNA-1	A0A4E0RGY2	A0A4E0RGY2|A0A4E0RGY2_FASHE_SUMO-activating_enzyme_subunit_1_OS=Fasciola_hepatica_OX=6192_GN=D915_008856_PE=4_SV=1	6.98	11.01	18.13	T0+T5+T10	0	0	0	ND.	--	--	--	--	--	--
maker-scaffold10x_102_pilon-snap-gene-0.69-mRNA-1	no hit	no hit	2.61	5.12	1.96	T0+T5+T10	0	0	0	ND.	--	--	--	--	--	--
maker-scaffold10x_102_pilon-snap-gene-0.70-mRNA-1	A0A4E0RU49	A0A4E0RU49|A0A4E0RU49_FASHE_Pre-B-cell_colony-enhancing_factor_OS=Fasciola_hepatica_OX=6192_GN=D915_003933_PE=4_SV=1	104.47	105.19	111.55	T0+T5+T10	0	0	0	ND.	--	-0.489148	--	--	--	--
maker-scaffold10x_102_pilon-snap-gene-0.72-mRNA-1	A0A4E0R3J7	A0A4E0R3J7|A0A4E0R3J7_FASHE_Signal_recognition_particle_receptor_B_subunit_159_OS=Fasciola_hepatica_OX=6192_GN=D915_008485_PE=4_SV=1	93.75	118.84	101.64	T0+T5+T10	72.88	81	70.57	T0+T5+T10	--	-0.589722	--	--	--	--
maker-scaffold10x_102_pilon-snap-gene-0.73-mRNA-1	A0A4E0RMI1	A0A4E0RMI1|A0A4E0RMI1_FASHE_Meiotic_recombination_protein_SPO11_OS=Fasciola_hepatica_OX=6192_GN=D915_007175_PE=4_SV=1	0.73	1.12	1.03	T0+T5+T10	0	0	0	ND.	--	--	--	--	--	--
maker-scaffold10x_102_pilon-snap-gene-0.74-mRNA-1	A0A4E0R9R3	A0A4E0R9R3|A0A4E0R9R3_FASHE_HDAC4_OS=Fasciola_hepatica_OX=6192_GN=D915_005402_PE=4_SV=1	0	0.34	1.22	T5+T10	0	0	0	ND.	--	5.17697	--	--	--	--
maker-scaffold10x_102_pilon-snap-gene-0.75-mRNA-1	A0A2H1CAV1	A0A2H1CAV1|A0A2H1CAV1_FASHE_Emp24/gp25L/p24_family_protein_OS=Fasciola_hepatica_OX=6192_GN=D915_005401_PE=3_SV=1	52.02	212.72	337.01	T0+T5+T10	228.69	267.42	246.81	T0+T5+T10	1.61382	2.04767	0.501091	--	--	--
maker-scaffold10x_1021_pilon-snap-gene-0.10-mRNA-1	no hit	no hit	0.39	0	0.21	T0+T10	0	0	0	ND.	--	--	--	--	--	--
maker-scaffold10x_1024_pilon-augustus-gene-0.0-mRNA-1	A0A4E0QUG1	A0A4E0QUG1|A0A4E0QUG1_FASHE_Mitochondrial_cytochrome_c_OS=Fasciola_hepatica_OX=6192_GN=D915_009744_PE=3_SV=1	243.95	315.06	473.38	T0+T5+T10	0	0	0	ND.	--	--	--	--	--	--
maker-scaffold10x_1024_pilon-pred_gff_StringTie-gene-0.2-mRNA-1	G7YGB8	G7YGB8|G7YGB8_CLOSI_Retrovirus-related_Pol_polyprotein_from_transposon_17,6_(Fragment)_OS=Clonorchis_sinensis_OX=79923_GN=CLF_107200_PE=4_SV=1	1.03	1.58	1.1	T0+T5+T10	0	0	0	ND.	--	--	--	--	--	--
maker-scaffold10x_1026_pilon-pred_gff_StringTie-gene-0.1-mRNA-1	A0A2H1CCN7	A0A2H1CCN7|A0A2H1CCN7_FASHE_ATP_synthase_subunit_C_OS=Fasciola_hepatica_OX=6192_GN=D915_004973_PE=3_SV=1	417.53	543.18	839.72	T0+T5+T10	0	0	0	ND.	--	--	--	--	--	--
maker-scaffold10x_1026_pilon-snap-gene-0.0-mRNA-1	A0A4E0RT32	A0A4E0RT32|A0A4E0RT32_FASHE_FYVE_RhoGEF_and_PH_domain-containing_protein_2_OS=Fasciola_hepatica_OX=6192_GN=D915_004972_PE=4_SV=1	26.22	25.94	18.93	T0+T5+T10	0	0	0	ND.	--	-0.927191	--	--	--	--
maker-scaffold10x_1029_pilon-snap-gene-0.1-mRNA-1	A0A4E0RK53	A0A4E0RK53|A0A4E0RK53_FASHE_Alkylated_DNA_repair_protein_AlkB_OS=Fasciola_hepatica_OX=6192_GN=D915_007408_PE=4_SV=1	3.31	3.61	3.27	T0+T5+T10	0	0	0	ND.	--	--	--	--	--	--
maker-scaffold10x_103_pilon-augustus-gene-0.72-mRNA-1	A0A4E0RCM6	A0A4E0RCM6|A0A4E0RCM6_FASHE_Receptor_protein-tyrosine_kinase_OS=Fasciola_hepatica_OX=6192_GN=D915_002717_PE=4_SV=1	3.11	2.07	2.68	T0+T5+T10	0	0	0	ND.	--	-0.892344	--	--	--	--
maker-scaffold10x_103_pilon-augustus-gene-0.81-mRNA-1	no hit	no hit	100.32	138.51	140.24	T0+T5+T10	0	0	0	ND.	--	--	--	--	--	--
maker-scaffold10x_103_pilon-pred_gff_StringTie-gene-0.5-mRNA-1	A0A2H1CC82	A0A2H1CC82|A0A2H1CC82_FASHE_Thioredoxin-like_protein_OS=Fasciola_hepatica_OX=6192_GN=D915_004921_PE=3_SV=1	91.58	143.58	195.41	T0+T5+T10	0	0	0	ND.	--	0.593534	--	--	--	--
maker-scaffold10x_103_pilon-snap-gene-0.100-mRNA-1	A0A504Y957	A0A504Y957|A0A504Y957_FASGI_Sodium:myo_inositol_cotransporter_OS=Fasciola_gigantica_OX=46835_GN=FGIG_10868_PE=3_SV=1	34.73	28.4	33.53	T0+T5+T10	0	0	0	ND.	-0.564653	-0.667369	--	--	--	--
maker-scaffold10x_103_pilon-snap-gene-0.102-mRNA-1	A0A4E0QZA6	A0A4E0QZA6|A0A4E0QZA6_FASHE_Ubiquitin-associated_protein_2_OS=Fasciola_hepatica_OX=6192_GN=D915_010574_PE=4_SV=1	0.45	0.15	0.37	T0+T5+T10	0	12.65	0	T5	--	--	--	--	--	-3.54191
maker-scaffold10x_103_pilon-snap-gene-0.103-mRNA-1	A0A183ADT6	A0A183ADT6|A0A183ADT6_9TREM_Integrase_catalytic_domain-containing_protein_OS=Echinostoma_caproni_OX=27848_GN=ECPE_LOCUS5121_PE=4_SV=1	0.26	0	0	T0	0	0	0	ND.	--	--	--	--	--	--
maker-scaffold10x_103_pilon-snap-gene-0.104-mRNA-1	A0A4E0RL52	A0A4E0RL52|A0A4E0RL52_FASHE_Dihydropyrimidinase_OS=Fasciola_hepatica_OX=6192_GN=D915_007377_PE=4_SV=1	82.98	135.26	217.5	T0+T5+T10	19.26	104.99	32.33	T0+T5+T10	--	0.489535	--	--	--	--
maker-scaffold10x_103_pilon-snap-gene-0.105-mRNA-1	A0A4E0R1S9	A0A4E0R1S9|A0A4E0R1S9_FASHE_Protein_cramped_OS=Fasciola_hepatica_OX=6192_GN=D915_007378_PE=4_SV=1	0.68	2.2	2.11	T0+T5+T10	0	0	0	ND.	--	--	--	--	--	--
maker-scaffold10x_103_pilon-snap-gene-0.106-mRNA-1	A0A4E0R6S6	A0A4E0R6S6|A0A4E0R6S6_FASHE_CDK5_regulatory_subunit-associated_protein_3_(CDK5_activator-binding_protein_C53)_OS=Fasciola_hepatica_OX=6192_GN=D915_008068_PE=4_SV=1	5.25	6.36	8.47	T0+T5+T10	13.55	20.26	0	T0+T5	--	--	--	--	--	--
maker-scaffold10x_103_pilon-snap-gene-0.108-mRNA-1	A0A4E0REY9	A0A4E0REY9|A0A4E0REY9_FASHE_Putative_dna_cross-link_repair_protein_pso2/snm1_OS=Fasciola_hepatica_OX=6192_GN=D915_004016_PE=4_SV=1	0.15	0.17	0.29	T0+T5+T10	0	0	0	ND.	--	--	--	--	--	--
maker-scaffold10x_103_pilon-snap-gene-0.109-mRNA-1	no hit	no hit	15.53	14.3	20.12	T0+T5+T10	0	0	0	ND.	--	--	--	--	--	--
maker-scaffold10x_103_pilon-snap-gene-0.110-mRNA-1	A0A504YL80	A0A504YL80|A0A504YL80_FASGI_Lysine-specific_demethylase_5A_(Fragment)_OS=Fasciola_gigantica_OX=46835_GN=FGIG_05233_PE=4_SV=1	0.04	0	0	T0	0	0	0	ND.	--	--	--	--	--	--
maker-scaffold10x_103_pilon-snap-gene-0.111-mRNA-1	A0A4E0RSW1	A0A4E0RSW1|A0A4E0RSW1_FASHE_Lysine-specific_demethylase_5C_OS=Fasciola_hepatica_OX=6192_GN=D915_004923_PE=4_SV=1	2.33	3.28	4.98	T0+T5+T10	0	0	0	ND.	--	--	--	--	--	--
maker-scaffold10x_103_pilon-snap-gene-0.112-mRNA-1	A0A4E0R3Z1	A0A4E0R3Z1|A0A4E0R3Z1_FASHE_Zinc_finger_C3HC4_type_(RING_finger)_OS=Fasciola_hepatica_OX=6192_GN=D915_007676_PE=4_SV=1	0.66	0	0.88	T0+T10	0	0	0	ND.	-4.9325	--	4.6782	--	--	--
maker-scaffold10x_103_pilon-snap-gene-0.113-mRNA-1	A0A504YCW8	A0A504YCW8|A0A504YCW8_FASGI_Cyclic_nucleotide-gated_cation_channel_alpha-3_OS=Fasciola_gigantica_OX=46835_GN=FGIG_08856_PE=4_SV=1	5.82	6.31	6.42	T0+T5+T10	0	0	0	ND.	--	--	--	--	--	--
maker-scaffold10x_103_pilon-snap-gene-0.114-mRNA-1	A0A4E0RSW7	A0A4E0RSW7|A0A4E0RSW7_FASHE_Cyclic_nucleotide-gated_channel_cone_photoreceptor_subunit_alpha_OS=Fasciola_hepatica_OX=6192_GN=D915_005543_PE=4_SV=1	0	0.12	0.16	T5+T10	0	0	0	ND.	--	--	--	--	--	--
maker-scaffold10x_103_pilon-snap-gene-0.115-mRNA-1	A0A4E0S2V2	A0A4E0S2V2|A0A4E0S2V2_FASHE_Tyrosinase_OS=Fasciola_hepatica_OX=6192_GN=D915_002718_PE=4_SV=1	2279	1847.58	1197.13	T0+T5+T10	313.1	262.78	77.74	T0+T5+T10	-0.706344	-1.51652	-0.748016	--	--	--
maker-scaffold10x_103_pilon-snap-gene-0.116-mRNA-1	A0A4E0RIY1	A0A4E0RIY1|A0A4E0RIY1_FASHE_DNA-directed_RNA_polymerase_subunit_OS=Fasciola_hepatica_OX=6192_GN=D915_002719_PE=3_SV=1	3.03	6.29	5.78	T0+T5+T10	0	0	0	ND.	--	--	--	--	--	--
maker-scaffold10x_103_pilon-snap-gene-0.117-mRNA-1	A0A4S2LTB1	A0A4S2LTB1|A0A4S2LTB1_OPIFE_WD_REPEATS_REGION_domain-containing_protein_OS=Opisthorchis_felineus_OX=147828_GN=CRM22_006257_PE=4_SV=1	0.3	0	0	T0	0	0	0	ND.	--	-5.67018	--	--	--	--
maker-scaffold10x_103_pilon-snap-gene-0.118-mRNA-1	A0A4E0R1S9	A0A4E0R1S9|A0A4E0R1S9_FASHE_Protein_cramped_OS=Fasciola_hepatica_OX=6192_GN=D915_007378_PE=4_SV=1	0.12	0	0	T0	0	0	0	ND.	--	--	--	--	--	--
maker-scaffold10x_103_pilon-snap-gene-0.119-mRNA-1	A0A4E0REY9	A0A4E0REY9|A0A4E0REY9_FASHE_Putative_dna_cross-link_repair_protein_pso2/snm1_OS=Fasciola_hepatica_OX=6192_GN=D915_004016_PE=4_SV=1	0.22	2.46	0.36	T0+T5+T10	0	0	0	ND.	--	--	--	--	--	--
maker-scaffold10x_103_pilon-snap-gene-0.96-mRNA-1	A0A4E0RTX3	A0A4E0RTX3|A0A4E0RTX3_FASHE_Calcium-binding_mitochondrial_carrier_protein_SCaMC-1_OS=Fasciola_hepatica_OX=6192_GN=D915_004922_PE=3_SV=1	0.1	0.46	3.33	T0+T5+T10	0	0	0	ND.	--	3.70554	--	--	--	--
maker-scaffold10x_103_pilon-snap-gene-0.97-mRNA-1	A0A4E0RJK3	A0A4E0RJK3|A0A4E0RJK3_FASHE_Replication_protein_A_subunit_OS=Fasciola_hepatica_OX=6192_GN=D915_007677_PE=3_SV=1	95.94	197.51	234.39	T0+T5+T10	0	0	0	ND.	0.716825	0.458424	--	--	--	--
maker-scaffold10x_103_pilon-snap-gene-0.99-mRNA-1	A0A4E0R9C7	A0A4E0R9C7|A0A4E0R9C7_FASHE_Tetraspanin_OS=Fasciola_hepatica_OX=6192_GN=D915_005542_PE=4_SV=1	3.56	1.84	0.87	T0+T5+T10	0	0	0	ND.	-1.21042	-2.14528	--	--	--	--
maker-scaffold10x_1030_pilon-augustus-gene-0.12-mRNA-1	A0A504YY75	A0A504YY75|A0A504YY75_FASGI_S5A_REDUCTASE_domain-containing_protein_OS=Fasciola_gigantica_OX=46835_GN=FGIG_07722_PE=4_SV=1	0.81	1.84	1.18	T0+T5+T10	0	0	0	ND.	--	--	--	--	--	--
maker-scaffold10x_1030_pilon-snap-gene-0.2-mRNA-1	A0A2H1C0U0	A0A2H1C0U0|A0A2H1C0U0_FASHE_START_domain_protein_(Fragment)_OS=Fasciola_hepatica_OX=6192_GN=D915_12056_PE=4_SV=1	88.87	88.97	93.09	T0+T5+T10	0	0	0	ND.	--	-0.604223	--	--	--	--
maker-scaffold10x_1035_pilon-augustus-gene-0.15-mRNA-1	A0A504YMQ0	A0A504YMQ0|A0A504YMQ0_FASGI_CTD_small_phosphatase_protein_OS=Fasciola_gigantica_OX=46835_GN=FGIG_03239_PE=4_SV=1	2.12	4.72	3.76	T0+T5+T10	0	0	0	ND.	--	--	--	--	--	--
maker-scaffold10x_1035_pilon-snap-gene-0.12-mRNA-1	A0A4E0R6A7	A0A4E0R6A7|A0A4E0R6A7_FASHE_Protein_AF-17_OS=Fasciola_hepatica_OX=6192_GN=D915_008287_PE=4_SV=1	10.85	26.29	21.39	T0+T5+T10	0	0	0	ND.	0.731321	--	--	--	--	--
maker-scaffold10x_1035_pilon-snap-gene-0.13-mRNA-1	A0A2H1BV20	A0A2H1BV20|A0A2H1BV20_FASHE_Proteasome_subunit_beta_OS=Fasciola_hepatica_OX=6192_GN=D915_14164_PE=3_SV=1	127.35	166.07	216.17	T0+T5+T10	0	0	0	ND.	--	--	--	--	--	--
maker-scaffold10x_1035_pilon-snap-gene-0.8-mRNA-1	A0A4E0RC99	A0A4E0RC99|A0A4E0RC99_FASHE_Putative_transcript_OS=Fasciola_hepatica_OX=6192_GN=D915_004074_PE=4_SV=1	5.42	32.23	39.57	T0+T5+T10	0	0	0	ND.	2.28221	2.12542	--	--	--	--
maker-scaffold10x_1035_pilon-snap-gene-0.9-mRNA-1	A0A504X0B7	A0A504X0B7|A0A504X0B7_FASGI_Ribosomal_L7Ae_domain-containing_protein_OS=Fasciola_gigantica_OX=46835_GN=FGIG_00149_PE=4_SV=1	37.08	51.5	71.05	T0+T5+T10	0	0	0	ND.	--	--	--	--	--	--
maker-scaffold10x_1038_pilon-snap-gene-0.3-mRNA-1	no hit	no hit	4.94	4.49	1.4	T0+T5+T10	0	0	0	ND.	--	--	--	--	--	--
maker-scaffold10x_1040_pilon-augustus-gene-0.36-mRNA-1	A0A2H1CBL2	A0A2H1CBL2|A0A2H1CBL2_FASHE_PDZ/DHR/GLGF_domain_protein_OS=Fasciola_hepatica_OX=6192_GN=D915_08001_PE=4_SV=1	0.4	0.91	2.6	T0+T5+T10	0	0	0	ND.	--	--	--	--	--	--
maker-scaffold10x_1040_pilon-snap-gene-0.41-mRNA-1	A0A4E0R1N3	A0A4E0R1N3|A0A4E0R1N3_FASHE_GRIP_domain-containing_protein_OS=Fasciola_hepatica_OX=6192_GN=D915_007191_PE=4_SV=1	5.39	4.2	4.48	T0+T5+T10	0	0	0	ND.	--	-0.67258	--	--	--	--
maker-scaffold10x_1040_pilon-snap-gene-0.42-mRNA-1	A0A4E0RXD8	A0A4E0RXD8|A0A4E0RXD8_FASHE_Williams-beuren_syndrome_critical_region_protein_OS=Fasciola_hepatica_OX=6192_GN=D915_008989_PE=4_SV=1	20.35	15.23	13.83	T0+T5+T10	0	0	0	ND.	-0.770525	-1.21735	--	--	--	--
maker-scaffold10x_1040_pilon-snap-gene-0.43-mRNA-1	A0A504YNV2	A0A504YNV2|A0A504YNV2_FASGI_SURP_and_G-patch_domain-containing_protein_1_OS=Fasciola_gigantica_OX=46835_GN=FGIG_09366_PE=4_SV=1	9.98	12.13	14.18	T0+T5+T10	0	0	0	ND.	--	--	--	--	--	--
maker-scaffold10x_1040_pilon-snap-gene-0.45-mRNA-1	A0A4E0RT41	A0A4E0RT41|A0A4E0RT41_FASHE_HEAT_repeat-containing_protein_OS=Fasciola_hepatica_OX=6192_GN=D915_004776_PE=4_SV=1	4.09	5.46	5.01	T0+T5+T10	0	0	0	ND.	--	--	--	--	--	--
maker-scaffold10x_1040_pilon-snap-gene-0.46-mRNA-1	A0A4E0RKX1	A0A4E0RKX1|A0A4E0RKX1_FASHE_Mediator_of_RNA_polymerase_II_transcription_subunit_4_OS=Fasciola_hepatica_OX=6192_GN=MED4_PE=3_SV=1	20.17	49.68	52.76	T0+T5+T10	0	0	0	ND.	0.944304	0.885559	--	--	--	--
maker-scaffold10x_1040_pilon-snap-gene-0.49-mRNA-1	A0A4E0RU60	A0A4E0RU60|A0A4E0RU60_FASHE_Calmodulin-binding_transcription_activator_1_OS=Fasciola_hepatica_OX=6192_GN=D915_004775_PE=4_SV=1	5.11	9.43	7.45	T0+T5+T10	0	0	0	ND.	--	--	--	--	--	--
maker-scaffold10x_1040_pilon-snap-gene-0.50-mRNA-1	A0A4E0RVW9	A0A4E0RVW9|A0A4E0RVW9_FASHE_RNA_binding_protein_Nova_1_(Fragment)_OS=Fasciola_hepatica_OX=6192_GN=D915_007400_PE=4_SV=1	110.66	146.84	117.65	T0+T5+T10	0	0	0	ND.	--	-0.592998	--	--	--	--
maker-scaffold10x_1041_pilon-pred_gff_StringTie-gene-0.23-mRNA-1	no hit	no hit	23.63	47.76	61.49	T0+T5+T10	0	0	0	ND.	--	0.67698	--	--	--	--
maker-scaffold10x_1041_pilon-snap-gene-0.11-mRNA-1	A0A2H1CHZ8	A0A2H1CHZ8|A0A2H1CHZ8_FASHE_Ribonuclease_(Fragment)_OS=Fasciola_hepatica_OX=6192_GN=D915_05570_PE=3_SV=1	31.71	59.35	101.87	T0+T5+T10	0	0	0	ND.	--	1.0173	0.623771	--	--	--
maker-scaffold10x_1041_pilon-snap-gene-0.12-mRNA-1	A0A4E0RVY3	A0A4E0RVY3|A0A4E0RVY3_FASHE_Ras_and_EF-hand_domain-containing_protein_OS=Fasciola_hepatica_OX=6192_GN=D915_003764_PE=4_SV=1	1.56	4.07	0.65	T0+T5+T10	0	0	0	ND.	--	--	-2.29941	--	--	--
maker-scaffold10x_1041_pilon-snap-gene-0.13-mRNA-1	A0A2H1CI06	A0A2H1CI06|A0A2H1CI06_FASHE_Tetratricopeptide_repeat_protein_OS=Fasciola_hepatica_OX=6192_GN=D915_05574_PE=4_SV=1	15.02	15.98	27.34	T0+T5+T10	0	0	0	ND.	--	--	--	--	--	--
maker-scaffold10x_1041_pilon-snap-gene-0.14-mRNA-1	A0A4E0R230	A0A4E0R230|A0A4E0R230_FASHE_Acyl-coenzyme_A_thioesterase_8_OS=Fasciola_hepatica_OX=6192_GN=D915_007699_PE=4_SV=1	29.71	37.78	42.4	T0+T5+T10	0	0	0	ND.	--	--	--	--	--	--
maker-scaffold10x_1041_pilon-snap-gene-0.6-mRNA-1	A0A4E0R2W2	A0A4E0R2W2|A0A4E0R2W2_FASHE_DUF4062_domain-containing_protein_OS=Fasciola_hepatica_OX=6192_GN=D915_006074_PE=4_SV=1	0.57	0.2	0.16	T0+T5+T10	0	0	0	ND.	--	--	--	--	--	--
maker-scaffold10x_1041_pilon-snap-gene-0.7-mRNA-1	A0A4E0S0K8	A0A4E0S0K8|A0A4E0S0K8_FASHE_Early_growth_response_protein_OS=Fasciola_hepatica_OX=6192_GN=D915_005261_PE=4_SV=1	0	0.14	0.09	T5+T10	0	0	0	ND.	--	--	--	--	--	--
maker-scaffold10x_1041_pilon-snap-gene-0.8-mRNA-1	A0A2H1C0U2	A0A2H1C0U2|A0A2H1C0U2_FASHE_U6_snRNA_phosphodiesterase_OS=Fasciola_hepatica_OX=6192_GN=D915_12043_PE=3_SV=1	3.11	6.21	9.59	T0+T5+T10	0	0	0	ND.	--	0.630769	--	--	--	--
maker-scaffold10x_1041_pilon-snap-gene-0.9-mRNA-1	G7YNC0	G7YNC0|G7YNC0_CLOSI_Acyl-CoA_thioesterase-related_OS=Clonorchis_sinensis_OX=79923_GN=CLF_102999_PE=4_SV=1	16.11	24.59	39.34	T0+T5+T10	0	0	0	ND.	--	0.547467	--	--	--	--
maker-scaffold10x_1043_pilon-augustus-gene-0.21-mRNA-1	A0A4E0QYR0	A0A4E0QYR0|A0A4E0QYR0_FASHE_PERQ_amino_acid-rich_with_GYF_domain-containing_protein_2_OS=Fasciola_hepatica_OX=6192_GN=D915_008756_PE=4_SV=1	64.33	180.53	212.62	T0+T5+T10	0	0	0	ND.	1.10634	1.12902	--	--	--	--
maker-scaffold10x_1043_pilon-snap-gene-0.15-mRNA-1	A0A5J4NDA3	A0A5J4NDA3|A0A5J4NDA3_9TREM_Ribosome_biogenesis_protein_NSA2_OS=Paragonimus_westermani_OX=34504_GN=DEA37_0013970_PE=4_SV=1	44.14	53.46	53.23	T0+T5+T10	0	0	0	ND.	--	-0.490556	--	--	--	--
maker-scaffold10x_1043_pilon-snap-gene-0.16-mRNA-1	A0A0X3PTN4	A0A0X3PTN4|A0A0X3PTN4_SCHSO_C9orf171_homolog_OS=Schistocephalus_solidus_OX=70667_GN=CI171_PE=4_SV=1	0	0	0	ND.	75.68	0	0	T0	--	--	--	-4.68644	--	--
maker-scaffold10x_1043_pilon-snap-gene-0.18-mRNA-1	Q06A71	Q06A71|Q06A71_FASHE_Glutathione_transferase_sigma_class_OS=Fasciola_hepatica_OX=6192_PE=1_SV=1	23254.4	20796.7	13250.2	T0+T5+T10	133912	143319	129598	T0+T5+T10	-0.672106	-1.51435	-0.779554	--	--	--
maker-scaffold10x_1043_pilon-snap-gene-0.19-mRNA-1	A0A504YSD4	A0A504YSD4|A0A504YSD4_FASGI_Nesprin-1_OS=Fasciola_gigantica_OX=46835_GN=FGIG_09198_PE=4_SV=1	0.83	1.33	1.09	T0+T5+T10	0	0	0	ND.	--	--	--	--	--	--
maker-scaffold10x_1045_pilon-snap-gene-0.10-mRNA-1	no hit	no hit	1775.17	1764.39	1260.24	T0+T5+T10	45.71	134.28	35.21	T0+T5+T10	-0.462603	-1.03548	--	--	--	--
maker-scaffold10x_1045_pilon-snap-gene-0.11-mRNA-1	A0A4E0RKM3	A0A4E0RKM3|A0A4E0RKM3_FASHE_Imidazolonepropionase_OS=Fasciola_hepatica_OX=6192_GN=D915_002030_PE=4_SV=1	6.48	8	10.74	T0+T5+T10	0	0	0	ND.	--	--	--	--	--	--
maker-scaffold10x_1045_pilon-snap-gene-0.12-mRNA-1	A0A4E0RP34	A0A4E0RP34|A0A4E0RP34_FASHE_Inositol-1_4_5-trisphosphate_5-phosphatase_OS=Fasciola_hepatica_OX=6192_GN=D915_006302_PE=4_SV=1	24.55	16.29	10.66	T0+T5+T10	0	0	0	ND.	-0.839768	-1.63271	--	--	--	--
maker-scaffold10x_1045_pilon-snap-gene-0.6-mRNA-1	no hit	no hit	14.65	14.99	50.81	T0+T5+T10	0	0	0	ND.	--	--	--	--	--	--
maker-scaffold10x_1045_pilon-snap-gene-0.7-mRNA-1	A0A504Z4L3	A0A504Z4L3|A0A504Z4L3_FASGI_Protein_regulator_of_cytokinesis_1_OS=Fasciola_gigantica_OX=46835_GN=FGIG_08103_PE=4_SV=1	6.17	12.74	24.24	T0+T5+T10	0	0	0	ND.	--	1.13225	--	--	--	--
maker-scaffold10x_1045_pilon-snap-gene-0.8-mRNA-1	A0A4E0R6H0	A0A4E0R6H0|A0A4E0R6H0_FASHE_DNA_topoisomerase_III_OS=Fasciola_hepatica_OX=6192_GN=D915_006301_PE=4_SV=1	1.37	1.93	0.63	T0+T5+T10	0	0	0	ND.	--	--	--	--	--	--
maker-scaffold10x_1045_pilon-snap-gene-0.9-mRNA-1	A0A4E0RDY8	A0A4E0RDY8|A0A4E0RDY8_FASHE_Cystine/glutamate_transporter_OS=Fasciola_hepatica_OX=6192_GN=D915_004727_PE=4_SV=1	0.64	1.05	3.85	T0+T5+T10	0	0	0	ND.	--	2.38053	2.09935	--	--	--
maker-scaffold10x_1048_pilon-augustus-gene-0.4-mRNA-1	A0A4E0R2M3	A0A4E0R2M3|A0A4E0R2M3_FASHE_Zinc_finger_protein_OS=Fasciola_hepatica_OX=6192_GN=D915_009121_PE=4_SV=1	35.32	47.29	46.37	T0+T5+T10	0	0	0	ND.	--	-0.362364	--	--	--	--
maker-scaffold10x_105_pilon-snap-gene-0.3-mRNA-1	A0A4E0S1B9	A0A4E0S1B9|A0A4E0S1B9_FASHE_F_box_only_protein_32_OS=Fasciola_hepatica_OX=6192_GN=D915_004402_PE=4_SV=1	21.82	17.72	19.15	T0+T5+T10	0	0	0	ND.	-0.900375	-0.983344	--	--	--	--
maker-scaffold10x_105_pilon-snap-gene-0.4-mRNA-1	A0A4E0RDG5	A0A4E0RDG5|A0A4E0RDG5_FASHE_Fructose-bisphosphate_aldolase_OS=Fasciola_hepatica_OX=6192_GN=D915_004403_PE=3_SV=1	0.69	0.97	4.48	T0+T5+T10	5413.13	1028.11	1303.46	T0+T5+T10	--	2.34679	--	-3.28287	--	--
maker-scaffold10x_105_pilon-snap-gene-0.5-mRNA-1	A0A4E0RZ56	A0A4E0RZ56|A0A4E0RZ56_FASHE_Serine/threonine_kinase_OS=Fasciola_hepatica_OX=6192_GN=D915_004404_PE=3_SV=1	9.77	31.44	39.09	T0+T5+T10	0	0	0	ND.	1.33546	1.69548	--	--	--	--
maker-scaffold10x_1050_pilon-augustus-gene-0.71-mRNA-1	A0A4E0RNL0	A0A4E0RNL0|A0A4E0RNL0_FASHE_Lipoma_hmgic_fusion_partner_protein_OS=Fasciola_hepatica_OX=6192_GN=D915_000617_PE=4_SV=1	0.23	0	0	T0	0	0	0	ND.	--	--	--	--	--	--
maker-scaffold10x_1050_pilon-augustus-gene-0.79-mRNA-1	no hit	no hit	5.97	13.97	14.5	T0+T5+T10	0	0	0	ND.	--	--	--	--	--	--
maker-scaffold10x_1050_pilon-pred_gff_StringTie-gene-0.58-mRNA-1	no hit	no hit	33.2	20.9	24.98	T0+T5+T10	0	0	0	ND.	-1.14604	-1.24401	--	--	--	--
maker-scaffold10x_1050_pilon-snap-gene-0.12-mRNA-1	A0A4E0RGC0	A0A4E0RGC0|A0A4E0RGC0_FASHE_Putative_nanos_RNA_binding_domain_OS=Fasciola_hepatica_OX=6192_GN=D915_002112_PE=3_SV=1	0.17	0	0	T0	0	0	0	ND.	--	--	--	--	--	--
maker-scaffold10x_1050_pilon-snap-gene-0.13-mRNA-1	A0A2H1CJH6	A0A2H1CJH6|A0A2H1CJH6_FASHE_Zinc_finger,_C2H2_type_OS=Fasciola_hepatica_OX=6192_GN=D915_05028_PE=4_SV=1	24.68	21.07	28.94	T0+T5+T10	0	0	0	ND.	-0.874001	-0.762733	--	--	--	--
maker-scaffold10x_1050_pilon-snap-gene-0.16-mRNA-1	A0A4E0RYC0	A0A4E0RYC0|A0A4E0RYC0_FASHE_Inositol_1_4_5-trisphosphate_receptor_OS=Fasciola_hepatica_OX=6192_GN=D915_000340_PE=4_SV=1	0.43	0	0.27	T0+T10	0	0	0	ND.	--	--	--	--	--	--
maker-scaffold10x_1050_pilon-snap-gene-0.17-mRNA-1	G7Y5H7	G7Y5H7|G7Y5H7_CLOSI_CD92-like_protein_OS=Clonorchis_sinensis_OX=79923_GN=CLF_101322_PE=3_SV=1	0.43	0.43	0	T0+T5	0	0	0	ND.	--	--	--	--	--	--
maker-scaffold10x_1050_pilon-snap-gene-0.1-mRNA-1	no hit	no hit	0.71	9.95	17.74	T0+T5+T10	0	0	0	ND.	3.38873	3.65145	--	--	--	--
maker-scaffold10x_1050_pilon-snap-gene-0.3-mRNA-1	G7YRA8	G7YRA8|G7YRA8_CLOSI_Protein_serine/threonine_kinase_OS=Clonorchis_sinensis_OX=79923_GN=CLF_108108_PE=4_SV=1	1.93	2.94	2.69	T0+T5+T10	0	0	0	ND.	--	--	--	--	--	--
maker-scaffold10x_1050_pilon-snap-gene-0.4-mRNA-1	no hit	no hit	0.14	1.25	1.28	T0+T5+T10	0	0	0	ND.	--	2.96699	--	--	--	--
maker-scaffold10x_1050_pilon-snap-gene-0.5-mRNA-1	A0A504YC68	A0A504YC68|A0A504YC68_FASGI_Putative_nanos_RNA_binding_domain_OS=Fasciola_gigantica_OX=46835_GN=FGIG_05491_PE=3_SV=1	1.12	0	0	T0	0	0	0	ND.	--	--	--	--	--	--
maker-scaffold10x_1050_pilon-snap-gene-0.6-mRNA-1	A0A4E0RYC0	A0A4E0RYC0|A0A4E0RYC0_FASHE_Inositol_1_4_5-trisphosphate_receptor_OS=Fasciola_hepatica_OX=6192_GN=D915_000340_PE=4_SV=1	36.15	27.6	19.24	T0+T5+T10	0	0	0	ND.	-0.712566	-1.45924	--	--	--	--
maker-scaffold10x_1050_pilon-snap-gene-0.8-mRNA-1	no hit	no hit	0	0	0.41	T10	0	0	0	ND.	--	--	--	--	--	--
maker-scaffold10x_1050_pilon-snap-gene-0.9-mRNA-1	A0A504Z5S5	A0A504Z5S5|A0A504Z5S5_FASGI_Putative_deoxyribonuclease_TATDN3_isoform_2_OS=Fasciola_gigantica_OX=46835_GN=FGIG_01088_PE=4_SV=1	57.8	111.26	93.36	T0+T5+T10	0	0	0	ND.	--	--	--	--	--	--
maker-scaffold10x_1052_pilon-snap-gene-0.10-mRNA-1	A0A4E0RNR5	A0A4E0RNR5|A0A4E0RNR5_FASHE_Phosphodiesterase_OS=Fasciola_hepatica_OX=6192_GN=D915_001976_PE=3_SV=1	0.46	0.35	1.85	T0+T5+T10	0	0	0	ND.	--	--	--	--	--	--
maker-scaffold10x_1052_pilon-snap-gene-0.11-mRNA-1	A0A4E0RIL1	A0A4E0RIL1|A0A4E0RIL1_FASHE_Nuclear_hormone_receptor_HR96_OS=Fasciola_hepatica_OX=6192_GN=D915_001975_PE=4_SV=1	0.44	1.19	0.5	T0+T5+T10	0	0	0	ND.	--	--	--	--	--	--
maker-scaffold10x_1053_pilon-snap-gene-0.1-mRNA-1	A0A4Z2D432	A0A4Z2D432|A0A4Z2D432_SCHJA_Ragulator_complex_protein_isoform_1_OS=Schistosoma_japonicum_OX=6182_GN=EWB00_004777_PE=4_SV=1	59.02	49.94	58.46	T0+T5+T10	0	0	0	ND.	-0.651863	-0.716087	--	--	--	--
maker-scaffold10x_1055_pilon-augustus-gene-0.16-mRNA-1	no hit	no hit	3.97	7.05	6.58	T0+T5+T10	0	0	0	ND.	--	--	--	--	--	--
maker-scaffold10x_1055_pilon-snap-gene-0.0-mRNA-1	A0A504YT86	A0A504YT86|A0A504YT86_FASGI_CTD_small_phosphatase_protein_OS=Fasciola_gigantica_OX=46835_GN=FGIG_06110_PE=4_SV=1	17.33	39.26	39.79	T0+T5+T10	0	0	0	ND.	0.599565	0.420769	--	--	--	--
maker-scaffold10x_1055_pilon-snap-gene-0.1-mRNA-1	A0A504YY65	A0A504YY65|A0A504YY65_FASGI_UDP-N-acetylglucosamine--dolichyl-phosphate_N-acetylglucosaminephosphotransferase_OS=Fasciola_gigantica_OX=46835_GN=FGIG_07984_PE=4_SV=1	60.64	60.97	87.99	T0+T5+T10	0	0	0	ND.	--	--	--	--	--	--
maker-scaffold10x_1055_pilon-snap-gene-0.2-mRNA-1	A0A2H1C3K8	A0A2H1C3K8|A0A2H1C3K8_FASHE_C-type_lectin_domain-containing_protein_OS=Fasciola_hepatica_OX=6192_GN=D915_007343_PE=4_SV=1	20838.9	20430.3	12919.8	T0+T5+T10	10265.9	13646.4	12956.7	T0+T5+T10	-0.431104	-1.11179	--	--	--	--
maker-scaffold10x_1056_pilon-pred_gff_StringTie-gene-0.13-mRNA-1	A0A075A4Y5	A0A075A4Y5|A0A075A4Y5_9TREM_Integrase_catalytic_domain-containing_protein_OS=Opisthorchis_viverrini_OX=6198_GN=T265_09435_PE=4_SV=1	127.98	184.89	329.8	T0+T5+T10	0	0	0	ND.	--	--	--	--	--	--
maker-scaffold10x_1056_pilon-snap-gene-0.24-mRNA-1	A0A4E0S0Z0	A0A4E0S0Z0|A0A4E0S0Z0_FASHE_Forkhead_box_protein_O_OS=Fasciola_hepatica_OX=6192_GN=D915_003164_PE=4_SV=1	2.06	4.02	3.67	T0+T5+T10	0	0	0	ND.	--	--	--	--	--	--
maker-scaffold10x_1056_pilon-snap-gene-0.25-mRNA-1	A0A4E0RAX5	A0A4E0RAX5|A0A4E0RAX5_FASHE_Ras_gene_family_member_T1_OS=Fasciola_hepatica_OX=6192_GN=D915_004261_PE=4_SV=1	19.9	32.75	22.86	T0+T5+T10	0	0	0	ND.	--	-0.517939	-0.638295	--	--	--
maker-scaffold10x_1056_pilon-snap-gene-0.26-mRNA-1	A0A4E0RZF8	A0A4E0RZF8|A0A4E0RZF8_FASHE_Zinc_finger_protein_OS=Fasciola_hepatica_OX=6192_GN=D915_004260_PE=4_SV=1	8.34	9.91	5.73	T0+T5+T10	0	0	0	ND.	--	-1.2053	-0.972753	--	--	--
maker-scaffold10x_1058_pilon-augustus-gene-0.66-mRNA-1	A0A4E0RU75	A0A4E0RU75|A0A4E0RU75_FASHE_PACT_coil_coil_domain-containing_protein_OS=Fasciola_hepatica_OX=6192_GN=D915_004822_PE=4_SV=1	0.33	0	0	T0	0	0	0	ND.	--	--	--	--	--	--
maker-scaffold10x_1058_pilon-augustus-gene-0.67-mRNA-1	A0A4E0RY56	A0A4E0RY56|A0A4E0RY56_FASHE_Polypeptide_N-acetylgalactosaminyltransferase_OS=Fasciola_hepatica_OX=6192_GN=D915_005477_PE=3_SV=1	8.19	11.06	6.04	T0+T5+T10	0	0	0	ND.	--	--	--	--	--	--
maker-scaffold10x_1058_pilon-pred_gff_StringTie-gene-0.41-mRNA-1	A0A5J4NYP4	A0A5J4NYP4|A0A5J4NYP4_9TREM_Reverse_transcriptase_domain-containing_protein_OS=Paragonimus_westermani_OX=34504_GN=DEA37_0006971_PE=4_SV=1	9.28	10.52	13.74	T0+T5+T10	0	0	0	ND.	--	--	--	--	--	--
maker-scaffold10x_1058_pilon-snap-gene-0.10-mRNA-1	A0A4E0RY56	A0A4E0RY56|A0A4E0RY56_FASHE_Polypeptide_N-acetylgalactosaminyltransferase_OS=Fasciola_hepatica_OX=6192_GN=D915_005477_PE=3_SV=1	0.12	0.06	0	T0+T5	0	0	0	ND.	--	-5.86729	--	--	--	--
maker-scaffold10x_1058_pilon-snap-gene-0.11-mRNA-1	A0A504YR12	A0A504YR12|A0A504YR12_FASGI_40S_ribosomal_protein_SA_OS=Fasciola_gigantica_OX=46835_GN=FGIG_00763_PE=3_SV=1	87.57	144.85	222.6	T0+T5+T10	1044.01	893.28	1107.71	T0+T5+T10	--	0.675055	--	--	--	0.769902
maker-scaffold10x_1058_pilon-snap-gene-0.12-mRNA-1	A0A4E0RN20	A0A4E0RN20|A0A4E0RN20_FASHE_Centrosomal_protein_of_120_kDa_OS=Fasciola_hepatica_OX=6192_GN=D915_007299_PE=4_SV=1	25.64	29.06	28.54	T0+T5+T10	0	0	0	ND.	--	-0.58482	--	--	--	--
maker-scaffold10x_1058_pilon-snap-gene-0.13-mRNA-1	A0A2H1C1P4	A0A2H1C1P4|A0A2H1C1P4_FASHE_Eukaryotic_ribosomal_protein_L18_OS=Fasciola_hepatica_OX=6192_GN=D915_007937_PE=4_SV=1	1575.54	1986.47	2923.07	T0+T5+T10	1247.42	2767.74	984.6	T0+T5+T10	--	--	--	1.02184	--	-1.13421
maker-scaffold10x_1058_pilon-snap-gene-0.14-mRNA-1	A0A5J4NJ27	A0A5J4NJ27|A0A5J4NJ27_9TREM_XPG_I_2_domain-containing_protein_OS=Paragonimus_westermani_OX=34504_GN=DEA37_0004336_PE=4_SV=1	4.97	12.42	26.84	T0+T5+T10	0	0	0	ND.	--	1.80882	1.08722	--	--	--
maker-scaffold10x_1058_pilon-snap-gene-0.17-mRNA-1	A0A4E0R0S5	A0A4E0R0S5|A0A4E0R0S5_FASHE_Polypeptide_N-acetylgalactosaminyltransferase_OS=Fasciola_hepatica_OX=6192_GN=D915_007938_PE=3_SV=1	11.14	11.11	12.17	T0+T5+T10	0	0	0	ND.	--	--	--	--	--	--
maker-scaffold10x_1058_pilon-snap-gene-0.18-mRNA-1	A0A4E0RU75	A0A4E0RU75|A0A4E0RU75_FASHE_PACT_coil_coil_domain-containing_protein_OS=Fasciola_hepatica_OX=6192_GN=D915_004822_PE=4_SV=1	0.23	0.15	0.4	T0+T5+T10	0	0	0	ND.	--	--	--	--	--	--
maker-scaffold10x_1058_pilon-snap-gene-0.8-mRNA-1	A0A4E0RAG3	A0A4E0RAG3|A0A4E0RAG3_FASHE_Polypeptide_N-acetylgalactosaminyltransferase_OS=Fasciola_hepatica_OX=6192_GN=D915_006370_PE=3_SV=1	225.54	185.51	114.17	T0+T5+T10	0	0	0	ND.	-0.731183	-1.47649	-0.683654	--	--	--
maker-scaffold10x_1058_pilon-snap-gene-0.9-mRNA-1	A0A4E0RBK3	A0A4E0RBK3|A0A4E0RBK3_FASHE_Probable_tRNA_N6-adenosine_threonylcarbamoyltransferase,_mitochondrial_OS=Fasciola_hepatica_OX=6192_GN=D915_005476_PE=3_SV=1	24.16	35.85	53.4	T0+T5+T10	0	0	0	ND.	--	--	--	--	--	--
maker-scaffold10x_1061_pilon-augustus-gene-0.0-mRNA-1	A0A4E0RS44	A0A4E0RS44|A0A4E0RS44_FASHE_Protein_phosphatase_1_regulatory_subunit_12B_isoform_X3_OS=Fasciola_hepatica_OX=6192_GN=D915_009390_PE=4_SV=1	5.18	2	0.95	T0+T5+T10	0	0	0	ND.	--	--	--	--	--	--
maker-scaffold10x_1061_pilon-augustus-gene-0.13-mRNA-1	A0A4E0RAC3	A0A4E0RAC3|A0A4E0RAC3_FASHE_Junctophilin-2_OS=Fasciola_hepatica_OX=6192_GN=D915_004935_PE=4_SV=1	0.07	0	0	T0	0	0	0	ND.	--	--	--	--	--	--
maker-scaffold10x_1061_pilon-pred_gff_StringTie-gene-0.40-mRNA-1	no hit	no hit	2.52	2.14	3.28	T0+T5+T10	0	0	0	ND.	--	--	--	--	--	--
maker-scaffold10x_1061_pilon-snap-gene-0.100-mRNA-1	A0A4E0RZ68	A0A4E0RZ68|A0A4E0RZ68_FASHE_Pyridoxine_kinase_OS=Fasciola_hepatica_OX=6192_GN=D915_004934_PE=4_SV=1	88.04	83.87	48.25	T0+T5+T10	0	63.07	0	T5	--	-1.41907	-0.896672	--	--	-3.66593
maker-scaffold10x_1061_pilon-snap-gene-0.101-mRNA-1	A0A504Z1H1	A0A504Z1H1|A0A504Z1H1_FASGI_Cytohesin-2_OS=Fasciola_gigantica_OX=46835_GN=FGIG_06597_PE=4_SV=1	39.13	91.37	130.43	T0+T5+T10	0	0	0	ND.	0.871827	0.932002	--	--	--	--
maker-scaffold10x_1061_pilon-snap-gene-0.103-mRNA-1	no hit	no hit	9.32	27.92	52.41	T0+T5+T10	0	0	0	ND.	1.10826	1.36093	--	--	--	--
maker-scaffold10x_1061_pilon-snap-gene-0.104-mRNA-1	no hit	no hit	0.41	0	0	T0	0	0	0	ND.	--	-4.76468	--	--	--	--
maker-scaffold10x_1061_pilon-snap-gene-0.106-mRNA-1	A0A4E0S0F5	A0A4E0S0F5|A0A4E0S0F5_FASHE_Cathepsin_B_cysteine_proteinase_3_OS=Fasciola_hepatica_OX=6192_GN=D915_005802_PE=4_SV=1	22.01	38.22	55.7	T0+T5+T10	0	0	0	ND.	--	--	--	--	--	--
maker-scaffold10x_1061_pilon-snap-gene-0.107-mRNA-1	A0A504YR96	A0A504YR96|A0A504YR96_FASGI_Putative_ATP-dependent_RNA_helicase_DDX47_OS=Fasciola_gigantica_OX=46835_GN=FGIG_05026_PE=3_SV=1	18.34	26.01	39.82	T0+T5+T10	0	0	0	ND.	--	--	--	--	--	--
maker-scaffold10x_1061_pilon-snap-gene-0.108-mRNA-1	A0A4E0QYA2	A0A4E0QYA2|A0A4E0QYA2_FASHE_Exportin-2_OS=Fasciola_hepatica_OX=6192_GN=D915_009631_PE=4_SV=1	2.39	7.81	3.47	T0+T5+T10	0	5.04	0	T5	--	--	--	2.71435	--	-2.71435
maker-scaffold10x_1061_pilon-snap-gene-0.95-mRNA-1	A0A504YFU0	A0A504YFU0|A0A504YFU0_FASGI_Protein_phosphatase_1_regulatory_subunit_12B_OS=Fasciola_gigantica_OX=46835_GN=FGIG_02688_PE=4_SV=1	37.55	35.62	24.52	T0+T5+T10	0	0	0	ND.	--	-1.28038	-0.767232	--	--	--
maker-scaffold10x_1061_pilon-snap-gene-0.97-mRNA-1	A0A4E0RFC2	A0A4E0RFC2|A0A4E0RFC2_FASHE_Regulatory-associated_protein_of_mTOR_OS=Fasciola_hepatica_OX=6192_GN=D915_002922_PE=4_SV=1	1.06	2.26	2.61	T0+T5+T10	0	0	0	ND.	--	--	--	--	--	--
maker-scaffold10x_1061_pilon-snap-gene-0.98-mRNA-1	A0A1W2WE35	A0A1W2WE35|A0A1W2WE35_CIOIN_uncharacterized_protein_C2orf81_homolog_OS=Ciona_intestinalis_OX=7719_GN=LOC100177758_PE=4_SV=1	12.92	2.43	1.12	T0+T5+T10	0	0	0	ND.	-2.65646	-3.78815	--	--	--	--
maker-scaffold10x_1061_pilon-snap-gene-0.99-mRNA-1	A0A3R7CBS8	A0A3R7CBS8|A0A3R7CBS8_CLOSI_Reverse_transcriptase_domain-containing_protein_OS=Clonorchis_sinensis_OX=79923_GN=CSKR_5463s_PE=4_SV=1	430.6	238.71	166.44	T0+T5+T10	0	19.54	0	T5	-1.27601	-2.0389	-0.699494	--	--	-3.73129
maker-scaffold10x_1062_pilon-snap-gene-0.1-mRNA-1	A0A504YZL2	A0A504YZL2|A0A504YZL2_FASGI_Small_nuclear_ribonucleoprotein_Sm_D2_OS=Fasciola_gigantica_OX=46835_GN=FGIG_06160_PE=3_SV=1	13.84	17.45	59.8	T0+T5+T10	0	0	0	ND.	--	--	--	--	--	--
maker-scaffold10x_1068_pilon-augustus-gene-0.118-mRNA-1	no hit	no hit	2.78	6.62	7.43	T0+T5+T10	0	0	0	ND.	--	0.784883	--	--	--	--
maker-scaffold10x_1068_pilon-augustus-gene-0.127-mRNA-1	A0A4E0RAT5	A0A4E0RAT5|A0A4E0RAT5_FASHE_Zinc_transporter_5_OS=Fasciola_hepatica_OX=6192_GN=D915_004392_PE=4_SV=1	3.99	8.23	9.98	T0+T5+T10	0	0	0	ND.	--	--	--	--	--	--
maker-scaffold10x_1068_pilon-pred_gff_StringTie-gene-0.74-mRNA-1	no hit	no hit	11.48	13.67	13.76	T0+T5+T10	0	0	0	ND.	--	--	--	--	--	--
maker-scaffold10x_1068_pilon-snap-gene-0.32-mRNA-1	A0A504Y846	A0A504Y846|A0A504Y846_FASGI_Zinc_finger_C2HC_domain-containing_protein_1B_OS=Fasciola_gigantica_OX=46835_GN=FGIG_00364_PE=4_SV=1	0.41	0.38	0	T0+T5	0	0	0	ND.	--	-4.13517	--	--	--	--
maker-scaffold10x_1068_pilon-snap-gene-0.34-mRNA-1	A0A4E0RCM8	A0A4E0RCM8|A0A4E0RCM8_FASHE_Leucine-rich_repeat-containing_protein_49_OS=Fasciola_hepatica_OX=6192_GN=D915_004107_PE=4_SV=1	0.06	0	0	T0	0	0	0	ND.	--	--	--	--	--	--
maker-scaffold10x_1068_pilon-snap-gene-0.35-mRNA-1	A0A4E0RL68	A0A4E0RL68|A0A4E0RL68_FASHE_Glycoprotein-N-acetylgalactosamine_3-beta-galactosyltransferase_1_OS=Fasciola_hepatica_OX=6192_GN=D915_007547_PE=4_SV=1	0.39	0	0	T0	0	0	0	ND.	--	-6.26286	--	--	--	--
maker-scaffold10x_1068_pilon-snap-gene-0.37-mRNA-1	A0A4Z2DBM2	A0A4Z2DBM2|A0A4Z2DBM2_SCHJA_Endoplasmic_reticulum-Golgi_intermediate_compartment_protein_OS=Schistosoma_japonicum_OX=6182_GN=EWB00_002811_PE=4_SV=1	0.5	0	0.5	T0+T10	0	0	0	ND.	--	--	--	--	--	--
maker-scaffold10x_1068_pilon-snap-gene-0.39-mRNA-1	A0A4E0RHS0	A0A4E0RHS0|A0A4E0RHS0_FASHE_PIH1_domain-containing_protein_2_OS=Fasciola_hepatica_OX=6192_GN=D915_001463_PE=4_SV=1	6.4	6.04	7.23	T0+T5+T10	0	0	0	ND.	--	--	--	--	--	--
maker-scaffold10x_1068_pilon-snap-gene-0.40-mRNA-1	A0A4E0RNU1	A0A4E0RNU1|A0A4E0RNU1_FASHE_Hypoxia_up-regulated_protein_1_OS=Fasciola_hepatica_OX=6192_GN=D915_001461_PE=4_SV=1	12.76	17.86	16.39	T0+T5+T10	440.88	521.89	427.31	T0+T5+T10	--	--	--	--	--	--
maker-scaffold10x_1068_pilon-snap-gene-0.43-mRNA-1	A0A4E0REP0	A0A4E0REP0|A0A4E0REP0_FASHE_Myeloid/lymphoid_or_mixed-lineage_leukemia_OS=Fasciola_hepatica_OX=6192_GN=D915_004106_PE=4_SV=1	0.01	0.15	0.01	T0+T5+T10	0	0	0	ND.	--	--	--	--	--	--
maker-scaffold10x_1068_pilon-snap-gene-0.44-mRNA-1	B0B5H2	B0B5H2|B0B5H2_FASHE_Tubulin_beta_chain_OS=Fasciola_hepatica_OX=6192_GN=beta-tub5_PE=2_SV=1	0.24	0.77	0	T0+T5	0	10.37	0	T5	--	--	--	--	--	--
maker-scaffold10x_1068_pilon-snap-gene-0.45-mRNA-1	A0A1S3KDS2	A0A1S3KDS2|A0A1S3KDS2_LINUN_uncharacterized_protein_C4orf22_homolog_OS=Lingula_unguis_OX=7574_GN=LOC106180819_PE=4_SV=1	4.57	1.63	7.73	T0+T5+T10	0	0	0	ND.	--	--	--	--	--	--
maker-scaffold10x_1068_pilon-snap-gene-0.46-mRNA-1	A0A504YEK4	A0A504YEK4|A0A504YEK4_FASGI_Tetraspanin_OS=Fasciola_gigantica_OX=46835_GN=FGIG_12267_PE=3_SV=1	76.18	75.92	91.28	T0+T5+T10	0	0	0	ND.	--	-0.417037	--	--	--	--
maker-scaffold10x_1072_pilon-augustus-gene-0.11-mRNA-1	A0A2H1CCA4	A0A2H1CCA4|A0A2H1CCA4_FASHE_Homeobox_domain_protein_OS=Fasciola_hepatica_OX=6192_GN=D915_07707_PE=4_SV=1	72.05	69.56	94.05	T0+T5+T10	0	0	0	ND.	--	--	--	--	--	--
maker-scaffold10x_1072_pilon-snap-gene-0.18-mRNA-1	A0A504Y7H5	A0A504Y7H5|A0A504Y7H5_FASGI_Serine/threonine-protein_kinase_TOR_OS=Fasciola_gigantica_OX=46835_GN=FGIG_08515_PE=3_SV=1	9.27	12.85	10.24	T0+T5+T10	0	0	0	ND.	--	--	--	--	--	--
maker-scaffold10x_1073_pilon-pred_gff_StringTie-gene-0.26-mRNA-1	no hit	no hit	0.83	6.85	19.48	T0+T5+T10	0	0	0	ND.	3.06325	3.97536	--	--	--	--
maker-scaffold10x_1073_pilon-snap-gene-0.0-mRNA-1	A0A4E0R2G4	A0A4E0R2G4|A0A4E0R2G4_FASHE_Platelet-activating_factor_acetylhydrolase_IB_subunit_gamma_OS=Fasciola_hepatica_OX=6192_GN=D915_009565_PE=4_SV=1	128.48	214.15	254.89	T0+T5+T10	0	44.08	0	T5	--	--	--	--	--	--
maker-scaffold10x_1073_pilon-snap-gene-0.1-mRNA-1	A0A504YG71	A0A504YG71|A0A504YG71_FASGI_Mitochondrial_import_receptor_subunit_TOM20_B_OS=Fasciola_gigantica_OX=46835_GN=FGIG_02541_PE=4_SV=1	65.39	81.34	113.48	T0+T5+T10	0	0	0	ND.	--	--	--	--	--	--
maker-scaffold10x_1074_pilon-augustus-gene-0.67-mRNA-1	H2KQM3	H2KQM3|H2KQM3_CLOSI_Major_facilitator_superfamily_domain-containing_protein_7-a_OS=Clonorchis_sinensis_OX=79923_GN=CLF_104275_PE=4_SV=1	0.57	0.31	0.58	T0+T5+T10	0	0	0	ND.	--	--	--	--	--	--
maker-scaffold10x_1074_pilon-augustus-gene-0.70-mRNA-1	A0A4S2LVU3	A0A4S2LVU3|A0A4S2LVU3_OPIFE_Importin_N-terminal_domain-containing_protein_OS=Opisthorchis_felineus_OX=147828_GN=CRM22_004495_PE=4_SV=1	23.13	39.95	47.61	T0+T5+T10	0	0	0	ND.	--	--	--	--	--	--
maker-scaffold10x_1074_pilon-snap-gene-0.101-mRNA-1	A0A419PZ98	A0A419PZ98|A0A419PZ98_CLOSI_Protein_SMG9_OS=Clonorchis_sinensis_OX=79923_GN=Smg9_PE=4_SV=1	49.91	64.33	80.31	T0+T5+T10	0	0	0	ND.	--	--	--	--	--	--
maker-scaffold10x_1074_pilon-snap-gene-0.102-mRNA-1	A0A504Z2B4	A0A504Z2B4|A0A504Z2B4_FASGI_mRNA_export_protein_rae1_OS=Fasciola_gigantica_OX=46835_GN=FGIG_01482_PE=4_SV=1	0.18	0.51	2.43	T0+T5+T10	0	0	0	ND.	--	3.66266	--	--	--	--
maker-scaffold10x_1074_pilon-snap-gene-0.103-mRNA-1	A0A4E0RX51	A0A4E0RX51|A0A4E0RX51_FASHE_Zinc_finger_homeobox_protein_3_OS=Fasciola_hepatica_OX=6192_GN=D915_001443_PE=4_SV=1	0	4.79	9.02	T5+T10	0	0	0	ND.	9.2214	10.0151	--	--	--	--
maker-scaffold10x_1074_pilon-snap-gene-0.104-mRNA-1	A0A4E0S3N8	A0A4E0S3N8|A0A4E0S3N8_FASHE_Neural_cell_adhesion_molecule_OS=Fasciola_hepatica_OX=6192_GN=D915_001445_PE=4_SV=1	2.47	7.21	11.9	T0+T5+T10	0	0	0	ND.	1.63964	2.2825	--	--	--	--
maker-scaffold10x_1074_pilon-snap-gene-0.107-mRNA-1	B0B5G8	B0B5G8|B0B5G8_FASHE_Tubulin_beta_chain_OS=Fasciola_hepatica_OX=6192_GN=beta-tub1_PE=2_SV=1	0.52	0	0.08	T0+T10	47297.7	11496	16446.4	T0+T5+T10	-6.08531	--	--	-2.46315	--	--
maker-scaffold10x_1074_pilon-snap-gene-0.109-mRNA-1	A0A4E0R4X0	A0A4E0R4X0|A0A4E0R4X0_FASHE_Vesicle_transport_through_interaction_with_t-SNAREs_1A_OS=Fasciola_hepatica_OX=6192_GN=D915_006283_PE=4_SV=1	9.75	11.07	12.1	T0+T5+T10	0	0	0	ND.	--	--	--	--	--	--
maker-scaffold10x_1074_pilon-snap-gene-0.110-mRNA-1	A0A504YH04	A0A504YH04|A0A504YH04_FASGI_Manganese-dependent_ADP-ribose/CDP-alcohol_diphosphatase_OS=Fasciola_gigantica_OX=46835_GN=FGIG_11144_PE=4_SV=1	0	1.97	6.78	T5+T10	0	0	0	ND.	--	6.77932	--	--	--	--
maker-scaffold10x_1074_pilon-snap-gene-0.111-mRNA-1	A0A4E0RBF7	A0A4E0RBF7|A0A4E0RBF7_FASHE_Heat_shock_transcription_factor_isoform_3_OS=Fasciola_hepatica_OX=6192_GN=D915_010496_PE=3_SV=1	2.18	3.19	4.89	T0+T5+T10	0	0	0	ND.	--	--	--	--	--	--
maker-scaffold10x_1074_pilon-snap-gene-0.113-mRNA-1	A0A2H1C6J7	A0A2H1C6J7|A0A2H1C6J7_FASHE_Ribosomal_protein_L13_OS=Fasciola_hepatica_OX=6192_GN=D915_006691_PE=3_SV=1	546.3	881.38	1343.4	T0+T5+T10	326.23	514.52	0	T0+T5	--	0.608859	--	--	--	-2.20459
maker-scaffold10x_1074_pilon-snap-gene-0.114-mRNA-1	A0A4E0R3C0	A0A4E0R3C0|A0A4E0R3C0_FASHE_TIM21_protein_mitochondrial_OS=Fasciola_hepatica_OX=6192_GN=D915_007399_PE=4_SV=1	29.74	54.25	123.33	T0+T5+T10	0	0	0	ND.	--	1.33179	--	--	--	--
maker-scaffold10x_1074_pilon-snap-gene-0.115-mRNA-1	A0A4E0R9D1	A0A4E0R9D1|A0A4E0R9D1_FASHE_Peptidyl-prolyl_cis-trans_isomerase_OS=Fasciola_hepatica_OX=6192_GN=D915_006284_PE=4_SV=1	0	0	0.02	T10	0	0	0	ND.	--	--	--	--	--	--
maker-scaffold10x_1074_pilon-snap-gene-0.116-mRNA-1	A0A504Z458	A0A504Z458|A0A504Z458_FASGI_Cleavage_and_polyadenylation_specificity_factor_subunit_OS=Fasciola_gigantica_OX=46835_GN=FGIG_09683_PE=4_SV=1	17.31	44.07	65.58	T0+T5+T10	0	0	0	ND.	1.15982	1.41376	--	--	--	--
maker-scaffold10x_1074_pilon-snap-gene-0.117-mRNA-1	A0A4E0RSD1	A0A4E0RSD1|A0A4E0RSD1_FASHE_Lethal(3)malignant_brain_tumor_3_OS=Fasciola_hepatica_OX=6192_GN=D915_000013_PE=4_SV=1	13.68	29.34	21.36	T0+T5+T10	0	0	0	ND.	--	--	--	--	--	--
maker-scaffold10x_1075_pilon-augustus-gene-0.40-mRNA-1	A0A4E0RMF0	A0A4E0RMF0|A0A4E0RMF0_FASHE_Septin-10_OS=Fasciola_hepatica_OX=6192_GN=D915_006624_PE=4_SV=1	1.02	0.68	0.42	T0+T5+T10	238.9	282.57	244.03	T0+T5+T10	--	-1.71871	--	--	--	--
maker-scaffold10x_1075_pilon-snap-gene-0.10-mRNA-1	A0A4E0RP39	A0A4E0RP39|A0A4E0RP39_FASHE_Prefoldin_subunit_2_OS=Fasciola_hepatica_OX=6192_GN=D915_006623_PE=4_SV=1	180.18	195.88	293.53	T0+T5+T10	102.56	127.43	0	T0+T5	--	--	--	--	--	--
maker-scaffold10x_1075_pilon-snap-gene-0.11-mRNA-1	A0A4E0R9H7	A0A4E0R9H7|A0A4E0R9H7_FASHE_Pollen-specific_protein_SF3_OS=Fasciola_hepatica_OX=6192_GN=D915_006390_PE=4_SV=1	0.68	4.21	2.32	T0+T5+T10	0	0	0	ND.	2.54536	--	--	--	--	--
maker-scaffold10x_1075_pilon-snap-gene-0.12-mRNA-1	A0A4E0R2Z1	A0A4E0R2Z1|A0A4E0R2Z1_FASHE_NADH_dehydrogenase_[ubiquinone]_1_beta_subcomplex_subunit_11_mitochondrial_OS=Fasciola_hepatica_OX=6192_GN=D915_006965_PE=4_SV=1	114.96	153.86	230.59	T0+T5+T10	0	0	0	ND.	--	--	--	--	--	--
maker-scaffold10x_1075_pilon-snap-gene-0.13-mRNA-1	A0A504Z570	A0A504Z570|A0A504Z570_FASGI_RhoGAP_OS=Fasciola_gigantica_OX=46835_GN=FGIG_09400_PE=4_SV=1	19.92	7.42	6.6	T0+T5+T10	0	0	0	ND.	-1.64502	-2.0038	--	--	--	--
maker-scaffold10x_1075_pilon-snap-gene-0.16-mRNA-1	A0A4E0QYI8	A0A4E0QYI8|A0A4E0QYI8_FASHE_Arginine:serine_rich_splicing_factor_OS=Fasciola_hepatica_OX=6192_GN=D915_009045_PE=4_SV=1	161.85	293.35	265.73	T0+T5+T10	99.53	138.8	88.68	T0+T5+T10	0.535832	--	--	--	--	--
maker-scaffold10x_1075_pilon-snap-gene-0.18-mRNA-1	A0A4E0RXU3	A0A4E0RXU3|A0A4E0RXU3_FASHE_RIIa_domain-containing_protein_1_OS=Fasciola_hepatica_OX=6192_GN=D915_002374_PE=4_SV=1	0.95	1.67	5.2	T0+T5+T10	0	0	0	ND.	--	--	--	--	--	--
maker-scaffold10x_1075_pilon-snap-gene-0.19-mRNA-1	A0A4E0RU62	A0A4E0RU62|A0A4E0RU62_FASHE_Cytoplasmic_dynein_2_heavy_chain_1_OS=Fasciola_hepatica_OX=6192_GN=D915_004064_PE=4_SV=1	0.44	0.49	0.4	T0+T5+T10	0	0	0	ND.	--	--	--	--	--	--
maker-scaffold10x_1075_pilon-snap-gene-0.20-mRNA-1	A0A504Z2I1	A0A504Z2I1|A0A504Z2I1_FASGI_Myotubularin_phosphatase_domain-containing_protein_OS=Fasciola_gigantica_OX=46835_GN=FGIG_03931_PE=4_SV=1	2.77	3.92	6.36	T0+T5+T10	0	0	0	ND.	--	0.711437	--	--	--	--
maker-scaffold10x_1080_pilon-augustus-gene-0.2-mRNA-1	A0A2H1C9U6	A0A2H1C9U6|A0A2H1C9U6_FASHE_RNase3_domain_protein_OS=Fasciola_hepatica_OX=6192_GN=D915_08656_PE=4_SV=1	10.21	10.79	13.02	T0+T5+T10	0	0	0	ND.	--	--	--	--	--	--
maker-scaffold10x_1080_pilon-snap-gene-0.12-mRNA-1	A0A4E0R7A4	A0A4E0R7A4|A0A4E0R7A4_FASHE_Endoribonuclease_Dicer_4_OS=Fasciola_hepatica_OX=6192_GN=D915_005200_PE=4_SV=1	13.97	26.25	23.96	T0+T5+T10	0	0	0	ND.	--	--	--	--	--	--
maker-scaffold10x_1083_pilon-snap-gene-0.14-mRNA-1	A0A2H1C612	A0A2H1C612|A0A2H1C612_FASHE_Electron_transfer_flavoprotein_FAD-binding_domain_protein_(Fragment)_OS=Fasciola_hepatica_OX=6192_GN=D915_10095_PE=4_SV=1	87.23	89.61	80.66	T0+T5+T10	0	0	0	ND.	-0.511623	-0.870603	--	--	--	--
maker-scaffold10x_1084_pilon-augustus-gene-0.59-mRNA-1	A0A4E0RJ61	A0A4E0RJ61|A0A4E0RJ61_FASHE_Putative_short_chain_acyl-coa_dehydrogen_OS=Fasciola_hepatica_OX=6192_GN=D915_000987_PE=3_SV=1	30.25	38.32	60.56	T0+T5+T10	0	0	0	ND.	--	--	--	--	--	--
maker-scaffold10x_1084_pilon-augustus-gene-0.64-mRNA-1	A0A4E0RSF5	A0A4E0RSF5|A0A4E0RSF5_FASHE_Protein_furry_OS=Fasciola_hepatica_OX=6192_GN=D915_005440_PE=4_SV=1	0.34	0.28	0.48	T0+T5+T10	0	0	0	ND.	--	--	--	--	--	--
maker-scaffold10x_1084_pilon-augustus-gene-0.69-mRNA-1	A0A4S2LPG3	A0A4S2LPG3|A0A4S2LPG3_OPIFE_MMS22L_C_domain-containing_protein_OS=Opisthorchis_felineus_OX=147828_GN=CRM22_005786_PE=4_SV=1	0.18	0.06	0.61	T0+T5+T10	0	0	0	ND.	--	--	--	--	--	--
maker-scaffold10x_1084_pilon-augustus-gene-0.78-mRNA-1	A0A4E0R6S0	A0A4E0R6S0|A0A4E0R6S0_FASHE_Nuclear_receptor_subfamily_1_group_I_member_3_OS=Fasciola_hepatica_OX=6192_GN=D915_005468_PE=3_SV=1	5.04	10.4	7.75	T0+T5+T10	0	0	0	ND.	--	--	--	--	--	--
maker-scaffold10x_1084_pilon-pred_gff_StringTie-gene-0.31-mRNA-1	A0A3R7CIV6	A0A3R7CIV6|A0A3R7CIV6_CLOSI_Cysteine-rich_PDZ-binding_protein_OS=Clonorchis_sinensis_OX=79923_GN=Cript_PE=4_SV=1	160.47	244.6	390.46	T0+T5+T10	0	0	0	ND.	--	0.569594	--	--	--	--
maker-scaffold10x_1084_pilon-snap-gene-0.127-mRNA-1	A0A4E0RCG2	A0A4E0RCG2|A0A4E0RCG2_FASHE_DnaJ_like_protein_subfamily_B_member_12_OS=Fasciola_hepatica_OX=6192_GN=D915_005311_PE=4_SV=1	369.94	314.21	305.29	T0+T5+T10	0	0	0	ND.	-0.695429	-1.05477	--	--	--	--
maker-scaffold10x_1084_pilon-snap-gene-0.128-mRNA-1	A0A4E0RSJ7	A0A4E0RSJ7|A0A4E0RSJ7_FASHE_Citrate_lyase_subunit_beta_protein_mitochondrial_OS=Fasciola_hepatica_OX=6192_GN=D915_005308_PE=4_SV=1	48.91	59.18	71.5	T0+T5+T10	0	0	0	ND.	--	--	--	--	--	--
maker-scaffold10x_1084_pilon-snap-gene-0.131-mRNA-1	no hit	no hit	1.94	5.34	4.22	T0+T5+T10	0	0	0	ND.	--	--	--	--	--	--
maker-scaffold10x_1084_pilon-snap-gene-0.132-mRNA-1	A0A419Q5U3	A0A419Q5U3|A0A419Q5U3_CLOSI_Putative_regulator_of_chromatin_OS=Clonorchis_sinensis_OX=79923_GN=Smarcad1_PE=4_SV=1	101.85	87.27	132.75	T0+T5+T10	0	0	0	ND.	-0.606296	-0.490773	--	--	--	--
maker-scaffold10x_1084_pilon-snap-gene-0.135-mRNA-1	A0A4E0S2W6	A0A4E0S2W6|A0A4E0S2W6_FASHE_Polycomb_protein_EED_protein_OS=Fasciola_hepatica_OX=6192_GN=D915_002653_PE=4_SV=1	34.4	48.98	109.67	T0+T5+T10	0	0	0	ND.	--	0.733033	--	--	--	--
maker-scaffold10x_1084_pilon-snap-gene-0.138-mRNA-1	A0A4E0RH63	A0A4E0RH63|A0A4E0RH63_FASHE_Mediator_of_RNA_polymerase_II_transcription_subunit_14_OS=Fasciola_hepatica_OX=6192_GN=D915_002821_PE=3_SV=1	1.48	5.02	6.61	T0+T5+T10	0	0	0	ND.	--	1.10748	--	--	--	--
maker-scaffold10x_1084_pilon-snap-gene-0.141-mRNA-1	Q5DH24	Q5DH24|Q5DH24_SCHJA_SJCHGC02583_protein_OS=Schistosoma_japonicum_OX=6182_GN=EWB00_010837_PE=2_SV=1	10.5	18.77	18.05	T0+T5+T10	0	0	0	ND.	--	--	--	--	--	--
maker-scaffold10x_1084_pilon-snap-gene-0.142-mRNA-1	A0A4E0R7M1	A0A4E0R7M1|A0A4E0R7M1_FASHE_Deoxyhypusine_hydroxylase_OS=Fasciola_hepatica_OX=6192_GN=D915_007335_PE=3_SV=1	15.6	18.55	22.59	T0+T5+T10	0	0	0	ND.	--	--	--	--	--	--
maker-scaffold10x_1084_pilon-snap-gene-0.143-mRNA-1	A0A504YRH8	A0A504YRH8|A0A504YRH8_FASGI_Potassium_voltage_gated_channel_subfamily_H_OS=Fasciola_gigantica_OX=46835_GN=FGIG_08887_PE=4_SV=1	3.44	6.6	5.51	T0+T5+T10	0	0	0	ND.	--	--	--	--	--	--
maker-scaffold10x_1084_pilon-snap-gene-0.145-mRNA-1	A0A2H1C895	A0A2H1C895|A0A2H1C895_FASHE_GMC_oxidoreductase_OS=Fasciola_hepatica_OX=6192_GN=D915_09246_PE=4_SV=1	0	0.81	0	T5	0	0	0	ND.	--	--	--	--	--	--
maker-scaffold10x_1084_pilon-snap-gene-0.146-mRNA-1	A0A183AY58	A0A183AY58|A0A183AY58_9TREM_Protein_YIPF_OS=Echinostoma_caproni_OX=27848_GN=ECPE_LOCUS11893_PE=3_SV=1	134	154.03	116.6	T0+T5+T10	0	0	0	ND.	--	-0.935111	--	--	--	--
maker-scaffold10x_1084_pilon-snap-gene-0.147-mRNA-1	A0A4E0RVN3	A0A4E0RVN3|A0A4E0RVN3_FASHE_Cytochrome_c_heme_lyase_OS=Fasciola_hepatica_OX=6192_GN=D915_002651_PE=3_SV=1	39.95	57.77	67.81	T0+T5+T10	0	0	0	ND.	--	--	--	--	--	--
maker-scaffold10x_1084_pilon-snap-gene-0.148-mRNA-1	A0A504YL00	A0A504YL00|A0A504YL00_FASGI_NADH_dehydrogenase_ubiquinone_iron_sulfur_OS=Fasciola_gigantica_OX=46835_GN=FGIG_03315_PE=3_SV=1	0	0.07	0.08	T5+T10	0	0	0	ND.	--	--	--	--	--	--
maker-scaffold10x_1084_pilon-snap-gene-0.150-mRNA-1	A0A2H1CXE7	A0A2H1CXE7|A0A2H1CXE7_FASHE_Thioredoxin_domain-containing_protein_9_OS=Fasciola_hepatica_OX=6192_GN=D915_000087_PE=4_SV=1	21.44	29.59	39.75	T0+T5+T10	0	0	0	ND.	--	--	--	--	--	--
maker-scaffold10x_1086_pilon-augustus-gene-0.53-mRNA-1	A0A4E0RFM9	A0A4E0RFM9|A0A4E0RFM9_FASHE_Zinc_finger_SWIM_domain-containing_protein_OS=Fasciola_hepatica_OX=6192_GN=D915_002749_PE=4_SV=1	44.92	45.73	30.68	T0+T5+T10	0	0	0	ND.	--	-1.19582	-0.823573	--	--	--
maker-scaffold10x_1086_pilon-augustus-gene-0.59-mRNA-1	A0A504YRG7	A0A504YRG7|A0A504YRG7_FASGI_O-acyltransferase_OS=Fasciola_gigantica_OX=46835_GN=FGIG_06565_PE=3_SV=1	3	0.34	0.61	T0+T5+T10	0	0	0	ND.	--	-3.01133	--	--	--	--
maker-scaffold10x_1086_pilon-pred_gff_StringTie-gene-0.30-mRNA-1	A0A2H1CRP9	A0A2H1CRP9|A0A2H1CRP9_FASHE_Cation_transporter_family_protein_OS=Fasciola_hepatica_OX=6192_GN=D915_001555_PE=3_SV=1	0.39	1.7	6.1	T0+T5+T10	0	0	0	ND.	--	3.20446	--	--	--	--
maker-scaffold10x_1086_pilon-snap-gene-0.100-mRNA-1	A0A4E0RYI7	A0A4E0RYI7|A0A4E0RYI7_FASHE_Putative_Guanosine-diphosphatase_OS=Fasciola_hepatica_OX=6192_GN=D915_005381_PE=3_SV=1	13.14	8.22	7.7	T0+T5+T10	0	0	0	ND.	-0.960663	-1.47461	--	--	--	--
maker-scaffold10x_1086_pilon-snap-gene-0.87-mRNA-1	A0A4E0S2V6	A0A4E0S2V6|A0A4E0S2V6_FASHE_Timeless_OS=Fasciola_hepatica_OX=6192_GN=D915_002746_PE=4_SV=1	12.32	28.09	50.68	T0+T5+T10	0	0	0	ND.	0.841882	1.01461	--	--	--	--
maker-scaffold10x_1086_pilon-snap-gene-0.89-mRNA-1	A0A4E0RJU3	A0A4E0RJU3|A0A4E0RJU3_FASHE_ANK_REP_REGION_domain-containing_protein_OS=Fasciola_hepatica_OX=6192_GN=D915_001556_PE=4_SV=1	15.09	23.8	27.89	T0+T5+T10	0	0	0	ND.	--	--	--	--	--	--
maker-scaffold10x_1086_pilon-snap-gene-0.93-mRNA-1	A0A504Z7F0	A0A504Z7F0|A0A504Z7F0_FASGI_Nucleolar_GTP-binding_protein_1_OS=Fasciola_gigantica_OX=46835_GN=FGIG_00519_PE=3_SV=1	22.65	34.09	48.33	T0+T5+T10	0	0	0	ND.	--	0.421151	--	--	--	--
maker-scaffold10x_1086_pilon-snap-gene-0.95-mRNA-1	A0A1S8X7D9	A0A1S8X7D9|A0A1S8X7D9_9TREM_DNA-directed_RNA_polymerase_subunit_beta_OS=Opisthorchis_viverrini_OX=6198_GN=X801_01472_PE=3_SV=1	44.48	118.81	130.54	T0+T5+T10	0	0	0	ND.	0.889439	0.725567	--	--	--	--
maker-scaffold10x_1086_pilon-snap-gene-0.97-mRNA-1	A0A4E0S0J1	A0A4E0S0J1|A0A4E0S0J1_FASHE_Cullin_5_OS=Fasciola_hepatica_OX=6192_GN=D915_003586_PE=3_SV=1	1.61	6.32	9.79	T0+T5+T10	0	0	0	ND.	1.32164	1.73429	--	--	--	--
maker-scaffold10x_1086_pilon-snap-gene-0.98-mRNA-1	A0A4E0R9I7	A0A4E0R9I7|A0A4E0R9I7_FASHE_Proteasomal_ATPase-associated_factor_1_OS=Fasciola_hepatica_OX=6192_GN=D915_004526_PE=4_SV=1	0	0	0.22	T10	0	0	0	ND.	--	--	--	--	--	--
maker-scaffold10x_1086_pilon-snap-gene-0.99-mRNA-1	A0A504YW06	A0A504YW06|A0A504YW06_FASGI_ATP_synthase_subunit_delta_mitochondrial_OS=Fasciola_gigantica_OX=46835_GN=FGIG_01134_PE=3_SV=1	86.45	73.55	104.62	T0+T5+T10	0	59.42	0	T5	-0.623358	-0.412311	--	--	--	--
maker-scaffold10x_1087_pilon-augustus-gene-0.11-mRNA-1	A0A4E0RA18	A0A4E0RA18|A0A4E0RA18_FASHE_RWD_domain-containing_protein_OS=Fasciola_hepatica_OX=6192_GN=D915_003975_PE=4_SV=1	12.58	16.6	18.22	T0+T5+T10	0	0	0	ND.	--	--	--	--	--	--
maker-scaffold10x_1087_pilon-augustus-gene-0.17-mRNA-1	A0A504YDP2	A0A504YDP2|A0A504YDP2_FASGI_Protein_kinase_C_kinase_2_OS=Fasciola_gigantica_OX=46835_GN=FGIG_01782_PE=4_SV=1	6.22	12.52	18.11	T0+T5+T10	0	0	0	ND.	--	0.927695	--	--	--	--
maker-scaffold10x_1087_pilon-snap-gene-0.63-mRNA-1	A0A4E0RAA1	A0A4E0RAA1|A0A4E0RAA1_FASHE_Zinc_finger_C2H2_OS=Fasciola_hepatica_OX=6192_GN=D915_006289_PE=4_SV=1	0	12.09	13.47	T5+T10	0	0	0	ND.	9.82665	9.39978	--	--	--	--
maker-scaffold10x_1087_pilon-snap-gene-0.64-mRNA-1	A0A2H1CHC6	A0A2H1CHC6|A0A2H1CHC6_FASHE_Zn-finger_in_Ran_binding_protein_(Fragment)_OS=Fasciola_hepatica_OX=6192_GN=D915_05862_PE=4_SV=1	29.11	76.36	67.52	T0+T5+T10	0	0	0	ND.	0.749781	--	--	--	--	--
maker-scaffold10x_1087_pilon-snap-gene-0.66-mRNA-1	A0A4E0R482	A0A4E0R482|A0A4E0R482_FASHE_Non-specific_serine/threonine_protein_kinase_OS=Fasciola_hepatica_OX=6192_GN=D915_006242_PE=4_SV=1	0.09	0	0	T0	0	0	0	ND.	--	--	--	--	--	--
maker-scaffold10x_1087_pilon-snap-gene-0.67-mRNA-1	A0A2H1CT09	A0A2H1CT09|A0A2H1CT09_FASHE_1-acyl-sn-glycerol-3-phosphate_acyltransferase_OS=Fasciola_hepatica_OX=6192_GN=D915_001140_PE=3_SV=1	20.63	52.36	80.65	T0+T5+T10	0	0	0	ND.	0.923614	1.35769	--	--	--	--
maker-scaffold10x_1087_pilon-snap-gene-0.68-mRNA-1	no hit	no hit	0.04	0	0	T0	0	0	0	ND.	--	--	--	--	--	--
maker-scaffold10x_1087_pilon-snap-gene-0.69-mRNA-1	A0A504YMZ0	A0A504YMZ0|A0A504YMZ0_FASGI_Coiled-coil_domain-containing_protein_OS=Fasciola_gigantica_OX=46835_GN=FGIG_03834_PE=4_SV=1	15.38	21.64	33.39	T0+T5+T10	0	0	0	ND.	--	--	--	--	--	--
maker-scaffold10x_1087_pilon-snap-gene-0.71-mRNA-1	A0A4E0RXD7	A0A4E0RXD7|A0A4E0RXD7_FASHE_DNA_helicase_OS=Fasciola_hepatica_OX=6192_GN=D915_006290_PE=3_SV=1	81.94	218.54	426.24	T0+T5+T10	0	0	0	ND.	1.15768	1.44004	--	--	--	--
maker-scaffold10x_1087_pilon-snap-gene-0.75-mRNA-1	A0A4E0RQB9	A0A4E0RQB9|A0A4E0RQB9_FASHE_Adaptor_protein_pacsin_OS=Fasciola_hepatica_OX=6192_GN=D915_001138_PE=4_SV=1	4.84	11.99	13.34	T0+T5+T10	0	0	0	ND.	--	0.715877	--	--	--	--
maker-scaffold10x_1087_pilon-snap-gene-0.76-mRNA-1	A0A4E0R2U1	A0A4E0R2U1|A0A4E0R2U1_FASHE_Delta(3_5)-Delta(2_4)-dienoyl-CoA_isomerase_mitochondrial_OS=Fasciola_hepatica_OX=6192_GN=D915_007792_PE=4_SV=1	6.81	30.18	47.73	T0+T5+T10	0	0	0	ND.	1.60782	1.7521	--	--	--	--
maker-scaffold10x_1089_pilon-augustus-gene-0.0-mRNA-1	A0A4E0R8Z4	A0A4E0R8Z4|A0A4E0R8Z4_FASHE_Nucleic_acid-binding_OB-fold_domain-containing_protein_OS=Fasciola_hepatica_OX=6192_GN=D915_007027_PE=4_SV=1	0.25	0.32	0.07	T0+T5+T10	0	0	0	ND.	--	--	--	--	--	--
maker-scaffold10x_1089_pilon-augustus-gene-0.10-mRNA-1	A0A4S2M2D1	A0A4S2M2D1|A0A4S2M2D1_OPIFE_DAGKc_domain-containing_protein_OS=Opisthorchis_felineus_OX=147828_GN=CRM22_003203_PE=4_SV=1	7.97	8.9	6.48	T0+T5+T10	0	0	0	ND.	--	-0.735484	--	--	--	--
maker-scaffold10x_1089_pilon-augustus-gene-0.11-mRNA-1	A0A4E0RCR2	A0A4E0RCR2|A0A4E0RCR2_FASHE_Dihydrolipoyllysine-residue_succinyltransferase_component_of_2-oxoglutarate_dehydrogenase_OS=Fasciola_hepatica_OX=6192_GN=D915_010165_PE=4_SV=1	78.28	164.47	173.56	T0+T5+T10	182.22	106	58.89	T0+T5+T10	0.769289	0.422129	--	--	--	--
maker-scaffold10x_1089_pilon-augustus-gene-0.2-mRNA-1	Q9NAT2	Q9NAT2|Q9NAT2_FASHE_Amoebapore-like_protein_OS=Fasciola_hepatica_OX=6192_PE=2_SV=1	14.28	1.45	0	T0+T5	0	0	0	ND.	--	-3.01402	--	--	--	--
maker-scaffold10x_1089_pilon-augustus-gene-0.3-mRNA-1	no hit	no hit	0.23	0	0	T0	0	0	0	ND.	--	--	--	--	--	--
maker-scaffold10x_1089_pilon-augustus-gene-0.8-mRNA-1	A0A2H1BSA5	A0A2H1BSA5|A0A2H1BSA5_FASHE_Saposin-like_type_B,_region_1_(Fragment)_OS=Fasciola_hepatica_OX=6192_GN=D915_15543_PE=4_SV=1	3.6	0	0	T0	7876.53	2869.17	11946.4	T0+T5+T10	--	-5.93324	--	--	--	2.80044
maker-scaffold10x_1089_pilon-snap-gene-0.64-mRNA-1	A0A4E0R033	A0A4E0R033|A0A4E0R033_FASHE_FHAP_protein_OS=Fasciola_hepatica_OX=6192_GN=D915_010001_PE=4_SV=1	0.03	0	0	T0	0	0	0	ND.	--	--	--	--	--	--
maker-scaffold10x_1089_pilon-snap-gene-0.66-mRNA-1	A0A504Z2X6	A0A504Z2X6|A0A504Z2X6_FASGI_DNA_helicase_OS=Fasciola_gigantica_OX=46835_GN=FGIG_01457_PE=3_SV=1	54.05	97.44	214.41	T0+T5+T10	0	0	0	ND.	0.682392	1.03892	--	--	--	--
maker-scaffold10x_1089_pilon-snap-gene-0.67-mRNA-1	A0A4E0S182	A0A4E0S182|A0A4E0S182_FASHE_C2H2-type_domain-containing_protein_OS=Fasciola_hepatica_OX=6192_GN=D915_004861_PE=4_SV=1	0	0	0.18	T10	0	0	0	ND.	--	--	--	--	--	--
maker-scaffold10x_1089_pilon-snap-gene-0.68-mRNA-1	no hit	no hit	15.76	15.66	24.93	T0+T5+T10	0	0	0	ND.	--	--	--	--	--	--
maker-scaffold10x_109_pilon-augustus-gene-0.10-mRNA-1	A0A4E0RXA3	A0A4E0RXA3|A0A4E0RXA3_FASHE_Wntless_Wnt_ligand_secretion_mediator_OS=Fasciola_hepatica_OX=6192_GN=D915_008905_PE=4_SV=1	15.01	64.15	100.99	T0+T5+T10	0	0	0	ND.	1.8207	2.0269	--	--	--	--
maker-scaffold10x_109_pilon-augustus-gene-0.8-mRNA-1	A0A504YLW4	A0A504YLW4|A0A504YLW4_FASGI_Cilia-and_flagella-associated_protein_57_OS=Fasciola_gigantica_OX=46835_GN=FGIG_04186_PE=4_SV=1	0	0	0	ND.	7.32	0	0	T0	--	--	--	--	--	--
maker-scaffold10x_109_pilon-snap-gene-0.1-mRNA-1	A0A4E0S141	A0A4E0S141|A0A4E0S141_FASHE_Formin_protein_3_OS=Fasciola_hepatica_OX=6192_GN=D915_004754_PE=4_SV=1	29.56	55.04	73.44	T0+T5+T10	0	0	0	ND.	0.475338	0.726964	--	--	--	--
maker-scaffold10x_109_pilon-snap-gene-0.3-mRNA-1	A0A4E0QWX8	A0A4E0QWX8|A0A4E0QWX8_FASHE_RAB18_member_Ras_oncogene_family_OS=Fasciola_hepatica_OX=6192_GN=D915_010211_PE=4_SV=1	237.11	223.7	240.86	T0+T5+T10	481.52	365.79	654.44	T0+T5+T10	-0.447593	-0.567956	--	--	--	1.25401
maker-scaffold10x_1092_pilon-augustus-gene-0.11-mRNA-1	A0A4E0R513	A0A4E0R513|A0A4E0R513_FASHE_Synaptogyrin_OS=Fasciola_hepatica_OX=6192_GN=D915_005506_PE=4_SV=1	104.27	164.58	161.12	T0+T5+T10	0	0	0	ND.	--	--	--	--	--	--
maker-scaffold10x_1092_pilon-augustus-gene-0.9-mRNA-1	A0A4E0RFD1	A0A4E0RFD1|A0A4E0RFD1_FASHE_Endonuclease/exonuclease/phosphatase_family_domain-containing_protein_1_OS=Fasciola_hepatica_OX=6192_GN=D915_004085_PE=4_SV=1	7.09	5.64	19.38	T0+T5+T10	0	0	0	ND.	--	--	1.13413	--	--	--
maker-scaffold10x_1092_pilon-snap-gene-0.1-mRNA-1	no hit	no hit	5.91	12.07	12.69	T0+T5+T10	0	0	0	ND.	--	--	--	--	--	--
maker-scaffold10x_1092_pilon-snap-gene-0.2-mRNA-1	Q5C422	Q5C422|Q5C422_SCHJA_SJCHGC09019_protein_(Fragment)_OS=Schistosoma_japonicum_OX=6182_PE=2_SV=2	0	0	0.07	T10	0	0	0	ND.	--	--	--	--	--	--
maker-scaffold10x_1092_pilon-snap-gene-0.3-mRNA-1	A0A4E0S2G1	A0A4E0S2G1|A0A4E0S2G1_FASHE_Forkhead_box_protein_L1_OS=Fasciola_hepatica_OX=6192_GN=D915_003286_PE=4_SV=1	0	0.23	4.51	T5+T10	0	0	0	ND.	--	7.58114	--	--	--	--
maker-scaffold10x_1092_pilon-snap-gene-0.4-mRNA-1	A0A4E0RBJ0	A0A4E0RBJ0|A0A4E0RBJ0_FASHE_Dynein_beta_chain_ciliary_OS=Fasciola_hepatica_OX=6192_GN=D915_003285_PE=4_SV=1	0.24	0	0.02	T0+T10	0	0	0	ND.	--	-4.42318	--	--	--	--
maker-scaffold10x_1093_pilon-augustus-gene-0.3-mRNA-1	no hit	no hit	6.76	3.19	5.47	T0+T5+T10	0	0	0	ND.	--	--	--	--	--	--
maker-scaffold10x_1096_pilon-snap-gene-0.57-mRNA-1	A0A4E0R4I6	A0A4E0R4I6|A0A4E0R4I6_FASHE_CHY_zinc_finger_protein_OS=Fasciola_hepatica_OX=6192_GN=D915_006660_PE=4_SV=1	3.5	1.97	2.08	T0+T5+T10	0	0	0	ND.	--	--	--	--	--	--
maker-scaffold10x_1096_pilon-snap-gene-0.58-mRNA-1	no hit	no hit	4.9	16.05	16.88	T0+T5+T10	0	0	0	ND.	1.14967	0.999956	--	--	--	--
maker-scaffold10x_1096_pilon-snap-gene-0.59-mRNA-1	A0A419QB79	A0A419QB79|A0A419QB79_CLOSI_Round_spermatid_basic_protein_1-like_protein_OS=Clonorchis_sinensis_OX=79923_GN=RSBN1L_PE=4_SV=1	7.98	11.68	9.13	T0+T5+T10	0	0	0	ND.	--	--	--	--	--	--
maker-scaffold10x_1096_pilon-snap-gene-0.61-mRNA-1	A0A4E0R125	A0A4E0R125|A0A4E0R125_FASHE_Cysteine_protease_OS=Fasciola_hepatica_OX=6192_GN=D915_007167_PE=3_SV=1	20.64	56.1	120.7	T0+T5+T10	0	0	0	ND.	1.10521	1.67917	0.643233	--	--	--
maker-scaffold10x_1096_pilon-snap-gene-0.62-mRNA-1	A0A4E0RAJ0	A0A4E0RAJ0|A0A4E0RAJ0_FASHE_F-box/LRR-repeat_protein_7_OS=Fasciola_hepatica_OX=6192_GN=D915_004837_PE=4_SV=1	0.47	0.56	0.7	T0+T5+T10	0	0	0	ND.	--	--	--	--	--	--
maker-scaffold10x_1096_pilon-snap-gene-0.63-mRNA-1	A0A4E0RJ29	A0A4E0RJ29|A0A4E0RJ29_FASHE_Sulfhydryl_oxidase_OS=Fasciola_hepatica_OX=6192_GN=D915_007946_PE=4_SV=1	0.16	0	0	T0	0	0	0	ND.	--	--	--	--	--	--
maker-scaffold10x_1096_pilon-snap-gene-0.64-mRNA-1	A0A4E0QUV0	A0A4E0QUV0|A0A4E0QUV0_FASHE_Dual_specificity_mitogen-activated_protein_kinase_kinase_7_OS=Fasciola_hepatica_OX=6192_GN=D915_010193_PE=4_SV=1	3.79	5.23	6.63	T0+T5+T10	0	0	0	ND.	--	--	--	--	--	--
maker-scaffold10x_1096_pilon-snap-gene-0.65-mRNA-1	A0A4E0S3E8	A0A4E0S3E8|A0A4E0S3E8_FASHE_Cellular_tumor_antigen_p53_OS=Fasciola_hepatica_OX=6192_GN=D915_001973_PE=4_SV=1	0.71	0	0	T0	0	0	0	ND.	-6.99642	-7.28251	--	--	--	--
maker-scaffold10x_1096_pilon-snap-gene-0.66-mRNA-1	A0A4E0RM71	A0A4E0RM71|A0A4E0RM71_FASHE_Tensin_OS=Fasciola_hepatica_OX=6192_GN=D915_006678_PE=4_SV=1	20.11	31.34	25.21	T0+T5+T10	0	0	0	ND.	--	--	--	--	--	--
maker-scaffold10x_1096_pilon-snap-gene-0.67-mRNA-1	A0A2H1C403	A0A2H1C403|A0A2H1C403_FASHE_Ribosomal_protein_L20_OS=Fasciola_hepatica_OX=6192_GN=D915_11550_PE=4_SV=1	6.83	8.75	15.59	T0+T5+T10	0	0	0	ND.	--	--	--	--	--	--
maker-scaffold10x_1096_pilon-snap-gene-0.68-mRNA-1	A0A4E0RYL2	A0A4E0RYL2|A0A4E0RYL2_FASHE_Exportin-1_OS=Fasciola_hepatica_OX=6192_GN=D915_007168_PE=4_SV=1	56.47	72.91	66.09	T0+T5+T10	29.73	59.54	33.64	T0+T5+T10	--	-0.387504	--	--	--	--
maker-scaffold10x_11_pilon-pred_gff_StringTie-gene-0.1-mRNA-1	A0A2H1CCD3	A0A2H1CCD3|A0A2H1CCD3_FASHE_Protein-S-isoprenylcysteine_O-methyltransferase_OS=Fasciola_hepatica_OX=6192_GN=D915_08426_PE=3_SV=1	4	5.87	8.67	T0+T5+T10	0	0	0	ND.	--	--	--	--	--	--
maker-scaffold10x_11_pilon-snap-gene-0.17-mRNA-1	A0A504Y6K9	A0A504Y6K9|A0A504Y6K9_FASGI_PPIase_OS=Fasciola_gigantica_OX=46835_GN=FGIG_11941_PE=4_SV=1	79.94	99.94	122.72	T0+T5+T10	0	0	0	ND.	--	--	--	--	--	--
maker-scaffold10x_11_pilon-snap-gene-0.18-mRNA-1	A0A504YMC6	A0A504YMC6|A0A504YMC6_FASGI_GPN-loop_GTPase_2_OS=Fasciola_gigantica_OX=46835_GN=FGIG_09601_PE=3_SV=1	16.69	41.33	97.66	T0+T5+T10	0	0	0	ND.	--	1.63213	0.841625	--	--	--
maker-scaffold10x_11_pilon-snap-gene-0.19-mRNA-1	A0A3R7D7G8	A0A3R7D7G8|A0A3R7D7G8_CLOSI_Stabilizer_of_axonemal_microtubules_2_OS=Clonorchis_sinensis_OX=79923_GN=SAXO2_PE=4_SV=1	16.71	7.92	5.9	T0+T5+T10	86.74	0	0	T0	-1.58262	-1.79944	--	-5.1758	--	--
maker-scaffold10x_11_pilon-snap-gene-0.20-mRNA-1	A0A4E0RS46	A0A4E0RS46|A0A4E0RS46_FASHE_Ras_association_domain-containing_protein_8_OS=Fasciola_hepatica_OX=6192_GN=D915_005564_PE=4_SV=1	7.2	9.81	14.13	T0+T5+T10	0	0	0	ND.	--	--	--	--	--	--
maker-scaffold10x_11_pilon-snap-gene-0.22-mRNA-1	A0A504YG73	A0A504YG73|A0A504YG73_FASGI_Coiled-coil_domain-containing_protein_12_OS=Fasciola_gigantica_OX=46835_GN=FGIG_05130_PE=4_SV=1	10.09	19.89	28.93	T0+T5+T10	0	0	0	ND.	--	0.707487	--	--	--	--
maker-scaffold10x_1102_pilon-snap-gene-0.28-mRNA-1	A0A3R7CD58	A0A3R7CD58|A0A3R7CD58_CLOSI_Spectrin_beta_chain_(Fragment)_OS=Clonorchis_sinensis_OX=79923_GN=Sptbn1_PE=4_SV=1	1.03	0.26	0.46	T0+T5+T10	0	0	0	ND.	--	-1.89846	--	--	--	--
maker-scaffold10x_1102_pilon-snap-gene-0.32-mRNA-1	A0A504YKI4	A0A504YKI4|A0A504YKI4_FASGI_Calponin-homology_(CH)_domain-containing_protein_(Fragment)_OS=Fasciola_gigantica_OX=46835_GN=FGIG_06559_PE=4_SV=1	0.28	0.13	0	T0+T5	0	0	0	ND.	--	--	--	--	--	--
maker-scaffold10x_1104_pilon-augustus-gene-0.0-mRNA-1	A0A4E0R4I4	A0A4E0R4I4|A0A4E0R4I4_FASHE_Digestive_organ_expansion_factor_OS=Fasciola_hepatica_OX=6192_GN=D915_005445_PE=4_SV=1	12.41	21.12	34.37	T0+T5+T10	0	0	0	ND.	--	--	--	--	--	--
maker-scaffold10x_1104_pilon-augustus-gene-0.5-mRNA-1	A0A4E0RZN6	A0A4E0RZN6|A0A4E0RZN6_FASHE_Cation_efflux_protein:_zinc_transporter_OS=Fasciola_hepatica_OX=6192_GN=D915_000910_PE=4_SV=1	829.01	465.57	328.07	T0+T5+T10	0	0	0	ND.	-1.32541	-2.03357	-0.645282	--	--	--
maker-scaffold10x_1104_pilon-augustus-gene-0.6-mRNA-1	A0A4E0RZN6	A0A4E0RZN6|A0A4E0RZN6_FASHE_Cation_efflux_protein:_zinc_transporter_OS=Fasciola_hepatica_OX=6192_GN=D915_000910_PE=4_SV=1	3.03	2.44	0	T0+T5	0	0	0	ND.	--	--	--	--	--	--
maker-scaffold10x_1104_pilon-snap-gene-0.61-mRNA-1	A0A4E0RQW0	A0A4E0RQW0|A0A4E0RQW0_FASHE_RUN_domain-containing_protein_OS=Fasciola_hepatica_OX=6192_GN=D915_000907_PE=4_SV=1	3.71	9.13	18.29	T0+T5+T10	0	0	0	ND.	--	1.21516	--	--	--	--
maker-scaffold10x_1104_pilon-snap-gene-0.62-mRNA-1	A0A4E0RJ95	A0A4E0RJ95|A0A4E0RJ95_FASHE_Nuclear_pore_complex_protein_Nup85_OS=Fasciola_hepatica_OX=6192_GN=D915_000909_PE=3_SV=1	6.05	14.73	23.96	T0+T5+T10	0	0	0	ND.	1.09612	1.14764	--	--	--	--
maker-scaffold10x_1104_pilon-snap-gene-0.63-mRNA-1	no hit	no hit	27.95	13.59	8.96	T0+T5+T10	0	0	0	ND.	-1.31009	-1.9053	--	--	--	--
maker-scaffold10x_1106_pilon-snap-gene-0.1-mRNA-1	A0A2H1CUE0	A0A2H1CUE0|A0A2H1CUE0_FASHE_Ribosomal_protein_S17P_OS=Fasciola_hepatica_OX=6192_GN=D915_01297_PE=3_SV=1	2147.69	2806.57	3950.43	T0+T5+T10	887.88	1028.93	712.15	T0+T5+T10	--	--	--	--	--	--
maker-scaffold10x_1106_pilon-snap-gene-0.2-mRNA-1	A0A4E0RN69	A0A4E0RN69|A0A4E0RN69_FASHE_Alpha-(1_6)-fucosyltransferase_OS=Fasciola_hepatica_OX=6192_GN=D915_000785_PE=3_SV=1	28.41	61.81	51.59	T0+T5+T10	0	0	0	ND.	0.834821	--	--	--	--	--
maker-scaffold10x_1106_pilon-snap-gene-0.4-mRNA-1	A0A4E0RWP3	A0A4E0RWP3|A0A4E0RWP3_FASHE_Chromobox_protein_1_(Heterochromatin_protein_1_beta)_OS=Fasciola_hepatica_OX=6192_GN=D915_003214_PE=4_SV=1	1145.2	2434.99	3041.9	T0+T5+T10	93.38	252.88	58.71	T0+T5+T10	0.647686	0.618067	--	--	--	--
maker-scaffold10x_1106_pilon-snap-gene-0.5-mRNA-1	A0A4E0RQX8	A0A4E0RQX8|A0A4E0RQX8_FASHE_Guanine_nucleotide_binding_protein_alpha_O_OS=Fasciola_hepatica_OX=6192_GN=D915_000788_PE=4_SV=1	0	0.18	0	T5	0	0	0	ND.	--	--	--	--	--	--
maker-scaffold10x_1106_pilon-snap-gene-0.6-mRNA-1	G7YND7	G7YND7|G7YND7_CLOSI_Cassette_chromosome_recombinase_b_OS=Clonorchis_sinensis_OX=79923_GN=CLF_103325_PE=4_SV=1	28.22	33.97	26.04	T0+T5+T10	0	0	0	ND.	--	-0.781691	--	--	--	--
maker-scaffold10x_1106_pilon-snap-gene-0.7-mRNA-1	A0A2H1CW75	A0A2H1CW75|A0A2H1CW75_FASHE_GT23_domain-containing_protein_OS=Fasciola_hepatica_OX=6192_GN=D915_01291_PE=3_SV=1	0.31	0	0	T0	0	0	0	ND.	--	--	--	--	--	--
maker-scaffold10x_1107_pilon-snap-gene-0.5-mRNA-1	A0A4E0RIN0	A0A4E0RIN0|A0A4E0RIN0_FASHE_DnaJ_subfamily_C_member_7_OS=Fasciola_hepatica_OX=6192_GN=D915_007732_PE=4_SV=1	2.09	1.54	2.58	T0+T5+T10	0	0	0	ND.	--	--	--	--	--	--
maker-scaffold10x_111_pilon-augustus-gene-0.2-mRNA-1	A0A4Z2DIJ0	A0A4Z2DIJ0|A0A4Z2DIJ0_SCHJA_Diuretic_hormone_receptor_isoform_1_OS=Schistosoma_japonicum_OX=6182_GN=EWB00_000556_PE=3_SV=1	0	0.68	0	T5	0	0	0	ND.	--	--	--	--	--	--
maker-scaffold10x_111_pilon-augustus-gene-0.4-mRNA-1	G7YPN0	G7YPN0|G7YPN0_CLOSI_SelT-like_protein_OS=Clonorchis_sinensis_OX=79923_GN=CLF_106117_PE=4_SV=1	87.91	117.97	186.53	T0+T5+T10	0	0	0	ND.	--	0.500999	--	--	--	--
maker-scaffold10x_111_pilon-augustus-gene-0.6-mRNA-1	A0A4E0RIZ9	A0A4E0RIZ9|A0A4E0RIZ9_FASHE_Neuronal_acetylcholine_receptor_subunit_alpha-7_OS=Fasciola_hepatica_OX=6192_GN=D915_000190_PE=3_SV=1	0.23	1.58	2.12	T0+T5+T10	0	0	0	ND.	--	2.32247	--	--	--	--
maker-scaffold10x_111_pilon-augustus-gene-0.7-mRNA-1	A0A4E0S498	A0A4E0S498|A0A4E0S498_FASHE_Cell_adhesion_molecule_OS=Fasciola_hepatica_OX=6192_GN=D915_000191_PE=4_SV=1	0.15	0.84	0.98	T0+T5+T10	0	0	0	ND.	2.17426	2.11962	--	--	--	--
maker-scaffold10x_111_pilon-snap-gene-0.70-mRNA-1	A0A4E0R504	A0A4E0R504|A0A4E0R504_FASHE_DUF1308_domain-containing_protein_OS=Fasciola_hepatica_OX=6192_GN=D915_007044_PE=4_SV=1	5.74	4.27	6.8	T0+T5+T10	0	0	0	ND.	--	--	--	--	--	--
maker-scaffold10x_111_pilon-snap-gene-0.73-mRNA-1	no hit	no hit	5.1	20.89	44.56	T0+T5+T10	0	0	0	ND.	1.57427	2.37073	--	--	--	--
maker-scaffold10x_111_pilon-snap-gene-0.76-mRNA-1	A0A4E0RDD3	A0A4E0RDD3|A0A4E0RDD3_FASHE_SH3_domain-binding_glutamic_acid-rich_protein_OS=Fasciola_hepatica_OX=6192_GN=D915_004601_PE=4_SV=1	262.31	305.25	272.05	T0+T5+T10	0	0	0	ND.	--	-0.647198	--	--	--	--
maker-scaffold10x_111_pilon-snap-gene-0.80-mRNA-1	A0A4E0R8R6	A0A4E0R8R6|A0A4E0R8R6_FASHE_EF-hand_domain-containing_family_member_B_OS=Fasciola_hepatica_OX=6192_GN=D915_006830_PE=4_SV=1	0	0	0	ND.	27.71	0	0	T0	--	--	--	-4.86237	--	--
maker-scaffold10x_111_pilon-snap-gene-0.81-mRNA-1	no hit	no hit	0.15	0	0	T0	0	0	0	ND.	--	-5.58934	--	--	--	--
maker-scaffold10x_111_pilon-snap-gene-0.83-mRNA-1	A0A4E0RF57	A0A4E0RF57|A0A4E0RF57_FASHE_Transient_receptor_potential_cation_channel_subfamily_A_member_1_OS=Fasciola_hepatica_OX=6192_GN=D915_003973_PE=3_SV=1	0	0	0.74	T10	0	0	0	ND.	--	3.46625	6.58178	--	--	--
maker-scaffold10x_111_pilon-snap-gene-0.84-mRNA-1	A0A4E0RBH2	A0A4E0RBH2|A0A4E0RBH2_FASHE_Serine_hydroxymethyltransferase_OS=Fasciola_hepatica_OX=6192_GN=D915_004602_PE=3_SV=1	40.83	67.82	111.84	T0+T5+T10	215.76	470.1	282.24	T0+T5+T10	--	0.701425	--	--	--	--
maker-scaffold10x_111_pilon-snap-gene-0.86-mRNA-1	A0A504YZC1	A0A504YZC1|A0A504YZC1_FASGI_Voltage-dependent_anion-selective_channel_protein_2_OS=Fasciola_gigantica_OX=46835_GN=FGIG_02916_PE=4_SV=1	168.94	235.01	317.57	T0+T5+T10	0	0	0	ND.	--	--	--	--	--	--
maker-scaffold10x_111_pilon-snap-gene-0.88-mRNA-1	A0A4E0RZV3	A0A4E0RZV3|A0A4E0RZV3_FASHE_RILP_protein_OS=Fasciola_hepatica_OX=6192_GN=D915_006417_PE=4_SV=1	15.81	34.04	54.17	T0+T5+T10	0	0	0	ND.	--	0.884373	--	--	--	--
maker-scaffold10x_1111_pilon-snap-gene-0.8-mRNA-1	A0A4E0R560	A0A4E0R560|A0A4E0R560_FASHE_U3_small_nucleolar_ribonucleoprotein_IMP3_OS=Fasciola_hepatica_OX=6192_GN=D915_007462_PE=4_SV=1	58.38	45.74	93.43	T0+T5+T10	0	0	0	ND.	-0.738177	--	--	--	--	--
maker-scaffold10x_1111_pilon-snap-gene-0.9-mRNA-1	A0A2H1C2M0	A0A2H1C2M0|A0A2H1C2M0_FASHE_BolA-like_protein_OS=Fasciola_hepatica_OX=6192_GN=D915_007461_PE=3_SV=1	177.71	170.66	285.21	T0+T5+T10	0	0	0	ND.	--	--	0.688908	--	--	--
maker-scaffold10x_1112_pilon-augustus-gene-0.4-mRNA-1	A0A4E0RUN0	A0A4E0RUN0|A0A4E0RUN0_FASHE_CLIP-associating_protein_1_OS=Fasciola_hepatica_OX=6192_GN=D915_003599_PE=4_SV=1	4	12.57	13.03	T0+T5+T10	0	0	0	ND.	1.15256	0.941367	--	--	--	--
maker-scaffold10x_1115_pilon-augustus-gene-0.70-mRNA-1	A0A4E0R5P3	A0A4E0R5P3|A0A4E0R5P3_FASHE_Fanconi-associated_nuclease_OS=Fasciola_hepatica_OX=6192_GN=D915_005524_PE=3_SV=1	0.08	0	0.79	T0+T10	0	0	0	ND.	--	--	6.16117	--	--	--
maker-scaffold10x_1115_pilon-augustus-gene-0.74-mRNA-1	G4VEI2	G4VEI2|G4VEI2_SCHMA_Acetyl-CoA_C-acetyltransferase_(Fragment)_OS=Schistosoma_mansoni_OX=6183_GN=Smp_197330_PE=4_SV=1	57.73	90.72	119.14	T0+T5+T10	0	22.38	0	T5	--	--	--	--	--	--
maker-scaffold10x_1115_pilon-snap-gene-0.10-mRNA-1	A0A4E0RLL8	A0A4E0RLL8|A0A4E0RLL8_FASHE_Secreted_frizzled_protein_1_OS=Fasciola_hepatica_OX=6192_GN=D915_000921_PE=4_SV=1	0	0	0.77	T10	0	0	0	ND.	--	5.7405	5.396	--	--	--
maker-scaffold10x_1115_pilon-snap-gene-0.11-mRNA-1	A0A4E0S342	A0A4E0S342|A0A4E0S342_FASHE_GAS2_protein_1_OS=Fasciola_hepatica_OX=6192_GN=D915_000920_PE=4_SV=1	3.97	14.32	12.33	T0+T5+T10	0	0	0	ND.	1.4032	1.14014	--	--	--	--
maker-scaffold10x_1115_pilon-snap-gene-0.14-mRNA-1	A0A1S8WRH1	A0A1S8WRH1|A0A1S8WRH1_9TREM_Mpp10_protein_(Fragment)_OS=Opisthorchis_viverrini_OX=6198_GN=X801_07199_PE=4_SV=1	35.39	29.38	50.6	T0+T5+T10	0	0	0	ND.	-0.686298	--	--	--	--	--
maker-scaffold10x_1115_pilon-snap-gene-0.17-mRNA-1	A0A4E0RZ00	A0A4E0RZ00|A0A4E0RZ00_FASHE_Protein_kinase_domain-containing_protein_OS=Fasciola_hepatica_OX=6192_GN=D915_001380_PE=4_SV=1	0	0.17	1.04	T5+T10	0	0	0	ND.	--	5.52599	--	--	--	--
maker-scaffold10x_1115_pilon-snap-gene-0.18-mRNA-1	no hit	no hit	0	0.76	2.46	T5+T10	0	0	0	ND.	--	--	--	--	--	--
maker-scaffold10x_1115_pilon-snap-gene-0.19-mRNA-1	A0A4E0RS78	A0A4E0RS78|A0A4E0RS78_FASHE_Eukaryotic_translation_initiation_factor_3_subunit_J_OS=Fasciola_hepatica_OX=6192_GN=D915_005523_PE=4_SV=1	52.57	65.87	87.66	T0+T5+T10	658.81	576.39	236.02	T0+T5+T10	--	--	--	--	--	--
maker-scaffold10x_1115_pilon-snap-gene-0.20-mRNA-1	A0A4E0R8J1	A0A4E0R8J1|A0A4E0R8J1_FASHE_Caspase-3_OS=Fasciola_hepatica_OX=6192_GN=D915_004014_PE=3_SV=1	75.38	79.14	78.52	T0+T5+T10	0	0	0	ND.	--	-0.704834	--	--	--	--
maker-scaffold10x_1115_pilon-snap-gene-0.4-mRNA-1	A0A4E0R1Q8	A0A4E0R1Q8|A0A4E0R1Q8_FASHE_Interferon_inducible_double_stranded_OS=Fasciola_hepatica_OX=6192_GN=D915_009113_PE=4_SV=1	4.99	14.02	21.28	T0+T5+T10	0	0	0	ND.	0.983474	1.45736	--	--	--	--
maker-scaffold10x_1115_pilon-snap-gene-0.5-mRNA-1	A0A4E0RFT0	A0A4E0RFT0|A0A4E0RFT0_FASHE_Probable_cytosolic_iron-sulfur_protein_assembly_protein_CIAO1_homolog_OS=Fasciola_hepatica_OX=6192_GN=D915_001382_PE=3_SV=1	74.96	70.99	66.82	T0+T5+T10	0	0	0	ND.	--	-0.767917	--	--	--	--
maker-scaffold10x_1115_pilon-snap-gene-0.6-mRNA-1	no hit	no hit	0.07	0	0	T0	0	0	0	ND.	--	--	--	--	--	--
maker-scaffold10x_1115_pilon-snap-gene-0.9-mRNA-1	A0A504YLM8	A0A504YLM8|A0A504YLM8_FASGI_Neurobeachin_protein_2_OS=Fasciola_gigantica_OX=46835_GN=FGIG_04874_PE=4_SV=1	0.03	0	0	T0	0	0	0	ND.	--	--	--	--	--	--
maker-scaffold10x_1119_pilon-augustus-gene-0.18-mRNA-1	A0A504YZB5	A0A504YZB5|A0A504YZB5_FASGI_UBIQUITIN_CONJUGAT_2_domain-containing_protein_OS=Fasciola_gigantica_OX=46835_GN=FGIG_07937_PE=4_SV=1	63.89	70.77	46.16	T0+T5+T10	0	0	0	ND.	--	-0.996432	-0.687528	--	--	--
maker-scaffold10x_1119_pilon-snap-gene-0.35-mRNA-1	A0A4E0RY66	A0A4E0RY66|A0A4E0RY66_FASHE_DEAD-box_ATP-dependent_RNA_helicase_13_OS=Fasciola_hepatica_OX=6192_GN=D915_007832_PE=3_SV=1	7.09	9.99	20.73	T0+T5+T10	0	0	0	ND.	--	0.797858	--	--	--	--
maker-scaffold10x_1119_pilon-snap-gene-0.38-mRNA-1	A0A504YNL0	A0A504YNL0|A0A504YNL0_FASGI_Vacuolar_protein_sorting-associated_protein_35_OS=Fasciola_gigantica_OX=46835_GN=FGIG_06731_PE=4_SV=1	78.14	82.3	88.74	T0+T5+T10	0	0	0	ND.	--	-0.537005	--	--	--	--
maker-scaffold10x_1119_pilon-snap-gene-0.39-mRNA-1	A0A504Z2N5	A0A504Z2N5|A0A504Z2N5_FASGI_WD_REPEATS_REGION_domain-containing_protein_OS=Fasciola_gigantica_OX=46835_GN=FGIG_09626_PE=4_SV=1	7.25	9.65	9.6	T0+T5+T10	0	0	0	ND.	--	--	--	--	--	--
maker-scaffold10x_1119_pilon-snap-gene-0.40-mRNA-1	A0A4E0S0Z1	A0A4E0S0Z1|A0A4E0S0Z1_FASHE_PH-interacting_protein_OS=Fasciola_hepatica_OX=6192_GN=D915_005029_PE=4_SV=1	0	0.54	0	T5	0	0	0	ND.	--	--	--	--	--	--
maker-scaffold10x_1124_pilon-snap-gene-0.45-mRNA-1	A0A075A1K1	A0A075A1K1|A0A075A1K1_9TREM_Reverse_transcriptase_domain-containing_protein_OS=Opisthorchis_viverrini_OX=6198_GN=T265_10371_PE=4_SV=1	110.31	104.77	75.47	T0+T5+T10	160.69	170.95	0	T0+T5	-0.471959	-1.10393	--	--	--	--
maker-scaffold10x_1124_pilon-snap-gene-0.46-mRNA-1	A0A4E0RIH2	A0A4E0RIH2|A0A4E0RIH2_FASHE_C2H2-type_domain-containing_protein_OS=Fasciola_hepatica_OX=6192_GN=D915_008309_PE=4_SV=1	4.29	21.1	17.76	T0+T5+T10	0	0	0	ND.	1.80222	1.64893	--	--	--	--
maker-scaffold10x_1124_pilon-snap-gene-0.47-mRNA-1	A0A504YTT0	A0A504YTT0|A0A504YTT0_FASGI_Xenotropic_and_polytropic_retrovirus_receptor_1_OS=Fasciola_gigantica_OX=46835_GN=FGIG_06774_PE=4_SV=1	4.82	5.6	2.81	T0+T5+T10	0	0	0	ND.	--	-1.53709	-1.21597	--	--	--
maker-scaffold10x_1124_pilon-snap-gene-0.49-mRNA-1	G7YIC2	G7YIC2|G7YIC2_CLOSI_Kelch-like_protein_2_OS=Clonorchis_sinensis_OX=79923_GN=CLF_108650_PE=4_SV=1	0.08	0.15	0.07	T0+T5+T10	0	0	0	ND.	--	--	--	--	--	--
maker-scaffold10x_1125_pilon-augustus-gene-0.100-mRNA-1	A0A4E0RY14	A0A4E0RY14|A0A4E0RY14_FASHE_E3_ubiquitin-protein_ligase_MYLIP-A_OS=Fasciola_hepatica_OX=6192_GN=D915_000652_PE=4_SV=1	1.13	0.65	0.6	T0+T5+T10	0	0	0	ND.	--	-1.40182	--	--	--	--
maker-scaffold10x_1125_pilon-augustus-gene-0.88-mRNA-1	A0A4E0QYC2	A0A4E0QYC2|A0A4E0QYC2_FASHE_Peptidyl-prolyl_cis-trans_isomerase_SDCCAG10_OS=Fasciola_hepatica_OX=6192_GN=D915_009327_PE=4_SV=1	14.13	25.32	25.36	T0+T5+T10	0	0	0	ND.	--	--	--	--	--	--
maker-scaffold10x_1125_pilon-augustus-gene-0.95-mRNA-1	A0A2H1CE91	A0A2H1CE91|A0A2H1CE91_FASHE_Ferritin_OS=Fasciola_hepatica_OX=6192_GN=D915_06978_PE=3_SV=1	1820.79	1111.82	696.72	T0+T5+T10	1896.61	2019.2	3260	T0+T5+T10	-1.17862	-2.03819	-0.797057	--	--	--
maker-scaffold10x_1125_pilon-snap-gene-0.110-mRNA-1	A0A4E0RU52	A0A4E0RU52|A0A4E0RU52_FASHE_Ran-binding_protein_3_OS=Fasciola_hepatica_OX=6192_GN=D915_004781_PE=4_SV=1	0.06	0.1	0	T0+T5	0	0	0	ND.	--	--	--	--	--	--
maker-scaffold10x_1125_pilon-snap-gene-0.111-mRNA-1	A0A4E0RBM0	A0A4E0RBM0|A0A4E0RBM0_FASHE_Molybdopterin_synthase_catalytic_subunit_OS=Fasciola_hepatica_OX=6192_GN=D915_004557_PE=4_SV=1	0	9.05	24.64	T5+T10	0	0	0	ND.	8.49426	9.72426	1.30254	--	--	--
maker-scaffold10x_1125_pilon-snap-gene-0.113-mRNA-1	A0A4E0R3V4	A0A4E0R3V4|A0A4E0R3V4_FASHE_HMG_box_domain-containing_protein_OS=Fasciola_hepatica_OX=6192_GN=D915_007313_PE=4_SV=1	4.03	73.77	78.64	T0+T5+T10	0	0	0	ND.	3.3478	3.28572	--	--	--	--
maker-scaffold10x_1125_pilon-snap-gene-0.115-mRNA-1	A0A504Y5D8	A0A504Y5D8|A0A504Y5D8_FASGI_U5_small_nuclear_ribonucleoprotein_component_OS=Fasciola_gigantica_OX=46835_GN=FGIG_10674_PE=4_SV=1	14.63	21.75	27.38	T0+T5+T10	0	0	0	ND.	--	--	--	--	--	--
maker-scaffold10x_1125_pilon-snap-gene-0.116-mRNA-1	A0A4E0RAL8	A0A4E0RAL8|A0A4E0RAL8_FASHE_SUEL-type_lectin_domain-containing_protein_OS=Fasciola_hepatica_OX=6192_GN=D915_004765_PE=4_SV=1	0	0.09	0	T5	0	0	0	ND.	--	--	--	--	--	--
maker-scaffold10x_1125_pilon-snap-gene-0.117-mRNA-1	A0A4E0R6X6	A0A4E0R6X6|A0A4E0R6X6_FASHE_Chromodomain_Y_protein_2_OS=Fasciola_hepatica_OX=6192_GN=D915_004783_PE=4_SV=1	4.82	15.03	11.46	T0+T5+T10	0	0	0	ND.	--	0.801078	--	--	--	--
maker-scaffold10x_1125_pilon-snap-gene-0.118-mRNA-1	A0A4E0RSE1	A0A4E0RSE1|A0A4E0RSE1_FASHE_Porphobilinogen_deaminase_OS=Fasciola_hepatica_OX=6192_GN=D915_009486_PE=4_SV=1	23.14	42.47	58.96	T0+T5+T10	0	0	0	ND.	--	0.541563	--	--	--	--
maker-scaffold10x_1125_pilon-snap-gene-0.119-mRNA-1	A0A4E0RDJ1	A0A4E0RDJ1|A0A4E0RDJ1_FASHE_Procollagen_galactosyltransferase_OS=Fasciola_hepatica_OX=6192_GN=D915_004556_PE=4_SV=1	1.13	2.44	0.75	T0+T5+T10	0	0	0	ND.	--	--	--	--	--	--
maker-scaffold10x_1125_pilon-snap-gene-0.120-mRNA-1	A0A4E0QUK4	A0A4E0QUK4|A0A4E0QUK4_FASHE_Lipopolysaccharide_induced_TNF_alpha_factor_OS=Fasciola_hepatica_OX=6192_GN=D915_009150_PE=4_SV=1	46.37	50.2	43	T0+T5+T10	0	0	0	ND.	--	-0.712936	--	--	--	--
maker-scaffold10x_1125_pilon-snap-gene-0.121-mRNA-1	A0A4E0QZV0	A0A4E0QZV0|A0A4E0QZV0_FASHE_Uroporphyrinogen_decarboxylase_OS=Fasciola_hepatica_OX=6192_GN=D915_009272_PE=3_SV=1	22.22	39.09	72.17	T0+T5+T10	0	0	0	ND.	--	0.910878	--	--	--	--
maker-scaffold10x_113_pilon-augustus-gene-0.24-mRNA-1	A0A4E0RI01	A0A4E0RI01|A0A4E0RI01_FASHE_Acyl-coenzyme_A_oxidase_OS=Fasciola_hepatica_OX=6192_GN=D915_008442_PE=4_SV=1	0.92	2.19	2.69	T0+T5+T10	0	0	0	ND.	--	--	--	--	--	--
maker-scaffold10x_113_pilon-augustus-gene-0.27-mRNA-1	A0A4E0RV69	A0A4E0RV69|A0A4E0RV69_FASHE_Maternal_protein_pumilio_OS=Fasciola_hepatica_OX=6192_GN=D915_003904_PE=4_SV=1	21.39	36.29	43.17	T0+T5+T10	0	0	0	ND.	--	--	--	--	--	--
maker-scaffold10x_113_pilon-augustus-gene-0.43-mRNA-1	A0A4E0RHD8	A0A4E0RHD8|A0A4E0RHD8_FASHE_Transmembrane_protein_63B_OS=Fasciola_hepatica_OX=6192_GN=D915_001053_PE=4_SV=1	4.66	5.8	11.49	T0+T5+T10	0	0	0	ND.	--	--	--	--	--	--
maker-scaffold10x_113_pilon-augustus-gene-0.45-mRNA-1	A0A504Y562	A0A504Y562|A0A504Y562_FASGI_SERPIN_domain-containing_protein_OS=Fasciola_gigantica_OX=46835_GN=FGIG_04537_PE=3_SV=1	5.43	9.72	14.12	T0+T5+T10	0	0	0	ND.	--	--	--	--	--	--
maker-scaffold10x_113_pilon-pred_gff_StringTie-gene-0.102-mRNA-1	no hit	no hit	1.89	3	4.17	T0+T5+T10	0	0	0	ND.	--	0.443191	--	--	--	--
maker-scaffold10x_113_pilon-pred_gff_StringTie-gene-0.150-mRNA-1	A0A183AEN9	A0A183AEN9|A0A183AEN9_9TREM_UBIQUITIN_CONJUGAT_2_domain-containing_protein_OS=Echinostoma_caproni_OX=27848_GN=ECPE_LOCUS5424_PE=3_SV=1	138.14	129.53	114.46	T0+T5+T10	0	0	0	ND.	-0.470977	-0.977636	--	--	--	--
maker-scaffold10x_113_pilon-snap-gene-0.184-mRNA-1	A0A504YGD2	A0A504YGD2|A0A504YGD2_FASGI_DUF4515_domain-containing_protein_OS=Fasciola_gigantica_OX=46835_GN=FGIG_04995_PE=4_SV=1	6.6	4.12	2.47	T0+T5+T10	0	0	0	ND.	--	-2.18164	--	--	--	--
maker-scaffold10x_113_pilon-snap-gene-0.188-mRNA-1	A0A504Z3T8	A0A504Z3T8|A0A504Z3T8_FASGI_Integrator_complex_subunit_7_OS=Fasciola_gigantica_OX=46835_GN=FGIG_05795_PE=4_SV=1	10.8	12.97	25.51	T0+T5+T10	0	0	0	ND.	--	--	--	--	--	--
maker-scaffold10x_113_pilon-snap-gene-0.189-mRNA-1	A0A4E0R2R2	A0A4E0R2R2|A0A4E0R2R2_FASHE_C2_domain-containing_protein_OS=Fasciola_hepatica_OX=6192_GN=D915_007624_PE=4_SV=1	7.44	25.64	21.85	T0+T5+T10	0	0	0	ND.	1.30696	0.921807	--	--	--	--
maker-scaffold10x_113_pilon-snap-gene-0.190-mRNA-1	A0A504YAN2	A0A504YAN2|A0A504YAN2_FASGI_Striatin-interacting_protein_2_OS=Fasciola_gigantica_OX=46835_GN=FGIG_02625_PE=4_SV=1	182.55	164.09	85.15	T0+T5+T10	0	0	0	ND.	-0.557682	-1.67958	-1.05341	--	--	--
maker-scaffold10x_113_pilon-snap-gene-0.191-mRNA-1	A0A4E0RIK8	A0A4E0RIK8|A0A4E0RIK8_FASHE_Patched_domain-containing_protein_3_OS=Fasciola_hepatica_OX=6192_GN=D915_008066_PE=4_SV=1	12.33	24.2	18.84	T0+T5+T10	0	0	0	ND.	--	--	--	--	--	--
maker-scaffold10x_113_pilon-snap-gene-0.192-mRNA-1	A0A4E0R6Y4	A0A4E0R6Y4|A0A4E0R6Y4_FASHE_NEK5_OS=Fasciola_hepatica_OX=6192_GN=D915_008022_PE=4_SV=1	0.34	0.13	0.56	T0+T5+T10	0	0	0	ND.	--	--	--	--	--	--
maker-scaffold10x_113_pilon-snap-gene-0.193-mRNA-1	A0A2H1C8C8	A0A2H1C8C8|A0A2H1C8C8_FASHE_GMP-PDE,_delta_subunit_OS=Fasciola_hepatica_OX=6192_GN=D915_006643_PE=4_SV=1	2.59	0	0	T0	0	0	0	ND.	--	--	--	--	--	--
maker-scaffold10x_113_pilon-snap-gene-0.194-mRNA-1	A0A4E0RBF6	A0A4E0RBF6|A0A4E0RBF6_FASHE_Gastrula_zinc_finger_protein_xFG20_1_OS=Fasciola_hepatica_OX=6192_GN=D915_004647_PE=4_SV=1	15.61	2.86	1.34	T0+T5+T10	0	0	0	ND.	-2.7456	-4.56167	--	--	--	--
maker-scaffold10x_113_pilon-snap-gene-0.195-mRNA-1	A0A4E0RA65	A0A4E0RA65|A0A4E0RA65_FASHE_Branched-chain-amino-acid_aminotransferase_OS=Fasciola_hepatica_OX=6192_GN=D915_004845_PE=3_SV=1	0.59	12.85	17.59	T0+T5+T10	0	0	0	ND.	3.6177	3.8251	--	--	--	--
maker-scaffold10x_113_pilon-snap-gene-0.196-mRNA-1	A0A4E0RI01	A0A4E0RI01|A0A4E0RI01_FASHE_Acyl-coenzyme_A_oxidase_OS=Fasciola_hepatica_OX=6192_GN=D915_008442_PE=4_SV=1	4.68	7.82	10.66	T0+T5+T10	0	0	0	ND.	--	--	--	--	--	--
maker-scaffold10x_113_pilon-snap-gene-0.197-mRNA-1	A0A2H1C0D4	A0A2H1C0D4|A0A2H1C0D4_FASHE_Mitochondrial_ribosomal_protein_S24_OS=Fasciola_hepatica_OX=6192_GN=D915_008441_PE=4_SV=1	13.36	12.08	28.16	T0+T5+T10	0	0	0	ND.	--	0.749881	1.31802	--	--	--
maker-scaffold10x_113_pilon-snap-gene-0.198-mRNA-1	no hit	no hit	1.42	1.63	0.95	T0+T5+T10	0	0	0	ND.	--	-1.40577	--	--	--	--
maker-scaffold10x_113_pilon-snap-gene-0.199-mRNA-1	G7Y3T0	G7Y3T0|G7Y3T0_CLOSI_DUF4817_domain-containing_protein_OS=Clonorchis_sinensis_OX=79923_GN=CLF_100586_PE=4_SV=1	0.77	6.16	3.3	T0+T5+T10	0	0	0	ND.	3.08663	2.51196	--	--	--	--
maker-scaffold10x_113_pilon-snap-gene-0.200-mRNA-1	A0A4E0RMW0	A0A4E0RMW0|A0A4E0RMW0_FASHE_cAMP-dependent_protein_kinase_type_II-alpha_regulatory_subunit_OS=Fasciola_hepatica_OX=6192_GN=D915_001055_PE=4_SV=1	232.65	231.04	171.24	T0+T5+T10	10.17	69.27	16.53	T0+T5+T10	-0.439559	-1.07944	--	--	--	--
maker-scaffold10x_113_pilon-snap-gene-0.204-mRNA-1	A0A4E0QZB4	A0A4E0QZB4|A0A4E0QZB4_FASHE_Carnitine/acylcarnitine_translocase_OS=Fasciola_hepatica_OX=6192_GN=D915_010241_PE=3_SV=1	13.32	17.73	23.88	T0+T5+T10	0	0	0	ND.	--	--	--	--	--	--
maker-scaffold10x_113_pilon-snap-gene-0.205-mRNA-1	no hit	no hit	56.75	20.28	45.5	T0+T5+T10	0	0	0	ND.	-2.2114	-1.01693	1.2555	--	--	--
maker-scaffold10x_113_pilon-snap-gene-0.207-mRNA-1	A0A4E0RXP2	A0A4E0RXP2|A0A4E0RXP2_FASHE_Lipoyltransferase_1_mitochondrial_OS=Fasciola_hepatica_OX=6192_GN=D915_006090_PE=4_SV=1	5.2	6.9	14.64	T0+T5+T10	0	0	0	ND.	--	--	--	--	--	--
maker-scaffold10x_113_pilon-snap-gene-0.210-mRNA-1	A0A504ZBK0	A0A504ZBK0|A0A504ZBK0_FASGI_T-complex_protein_1_subunit_eta_OS=Fasciola_gigantica_OX=46835_GN=FGIG_07642_PE=3_SV=1	154.49	273.22	399.04	T0+T5+T10	407.9	695.14	412.41	T0+T5+T10	0.412735	0.612636	--	--	--	--
maker-scaffold10x_113_pilon-snap-gene-0.211-mRNA-1	A0A4E0R106	A0A4E0R106|A0A4E0R106_FASHE_Nanos_1_OS=Fasciola_hepatica_OX=6192_GN=D915_007877_PE=3_SV=1	54.17	440.7	277	T0+T5+T10	0	0	0	ND.	2.54019	1.52906	--	--	--	--
maker-scaffold10x_113_pilon-snap-gene-0.212-mRNA-1	A0A4E0RUH0	A0A4E0RUH0|A0A4E0RUH0_FASHE_Protein_phosphatase_methylesterase_1_OS=Fasciola_hepatica_OX=6192_GN=D915_004648_PE=4_SV=1	134.03	109.26	114.21	T0+T5+T10	0	22.17	0	T5	-0.722869	-1.10171	--	--	--	--
maker-scaffold10x_113_pilon-snap-gene-0.213-mRNA-1	A0A4E0RZ46	A0A4E0RZ46|A0A4E0RZ46_FASHE_Sodium/potassium/calcium_exchanger_6_mitochondrial_OS=Fasciola_hepatica_OX=6192_GN=D915_004844_PE=3_SV=1	0	0.55	0.62	T5+T10	0	0	0	ND.	5.92355	5.92723	--	--	--	--
maker-scaffold10x_1131_pilon-snap-gene-0.0-mRNA-1	no hit	no hit	0.89	3.68	0	T0+T5	0	0	0	ND.	--	--	--	--	--	--
maker-scaffold10x_1137_pilon-snap-gene-0.100-mRNA-1	A0A4E0QYK3	A0A4E0QYK3|A0A4E0QYK3_FASHE_Origin_recognition_complex_subunit_2_OS=Fasciola_hepatica_OX=6192_GN=D915_009184_PE=4_SV=1	37.85	92.98	157.11	T0+T5+T10	0	0	0	ND.	0.969592	1.14581	--	--	--	--
maker-scaffold10x_1137_pilon-snap-gene-0.102-mRNA-1	A0A504YCZ9	A0A504YCZ9|A0A504YCZ9_FASGI_Armadillo_repeat_protein_deleted_in_velo-cardio-facial_syndrome_protein_OS=Fasciola_gigantica_OX=46835_GN=FGIG_05802_PE=4_SV=1	2.11	0.55	0.66	T0+T5+T10	0	0	0	ND.	-2.72358	-2.53726	--	--	--	--
maker-scaffold10x_1137_pilon-snap-gene-0.103-mRNA-1	A0A4E0R136	A0A4E0R136|A0A4E0R136_FASHE_Lysophosphatidic_acid_phosphatase_type_6_OS=Fasciola_hepatica_OX=6192_GN=D915_009402_PE=3_SV=1	18.82	16.91	21.5	T0+T5+T10	0	0	0	ND.	--	--	--	--	--	--
maker-scaffold10x_1137_pilon-snap-gene-0.104-mRNA-1	Q5DBI3	Q5DBI3|Q5DBI3_SCHJA_SJCHGC04855_protein_OS=Schistosoma_japonicum_OX=6182_PE=2_SV=1	22.24	16.58	36.24	T0+T5+T10	0	0	0	ND.	-0.867689	--	--	--	--	--
maker-scaffold10x_1137_pilon-snap-gene-0.106-mRNA-1	no hit	no hit	14.81	16.24	15.4	T0+T5+T10	0	0	0	ND.	--	-0.685273	--	--	--	--
maker-scaffold10x_1137_pilon-snap-gene-0.107-mRNA-1	A0A504YYZ3	A0A504YYZ3|A0A504YYZ3_FASGI_Elongation_of_very_long_chain_fatty_acids_protein_OS=Fasciola_gigantica_OX=46835_GN=FGIG_07714_PE=3_SV=1	143.86	144.17	184.17	T0+T5+T10	0	0	0	ND.	--	--	--	--	--	--
maker-scaffold10x_1137_pilon-snap-gene-0.108-mRNA-1	A0A504YJ27	A0A504YJ27|A0A504YJ27_FASGI_Receptor-type_tyrosine-protein_phosphatase_R_OS=Fasciola_gigantica_OX=46835_GN=FGIG_08189_PE=4_SV=1	1.83	5.41	5.08	T0+T5+T10	0	0	0	ND.	1.06127	--	--	--	--	--
maker-scaffold10x_1137_pilon-snap-gene-0.89-mRNA-1	A0A4E0QYX0	A0A4E0QYX0|A0A4E0QYX0_FASHE_Armadillo_repeat-containing_protein_6_OS=Fasciola_hepatica_OX=6192_GN=D915_008494_PE=4_SV=1	25.18	37.66	53.55	T0+T5+T10	0	0	0	ND.	--	--	--	--	--	--
maker-scaffold10x_1137_pilon-snap-gene-0.90-mRNA-1	A0A4E0R5V1	A0A4E0R5V1|A0A4E0R5V1_FASHE_Putative_glucose_transporter_OS=Fasciola_hepatica_OX=6192_GN=D915_007095_PE=4_SV=1	11.31	9.57	9.12	T0+T5+T10	0	0	0	ND.	--	-0.861003	--	--	--	--
maker-scaffold10x_1137_pilon-snap-gene-0.94-mRNA-1	A0A4E0RX54	A0A4E0RX54|A0A4E0RX54_FASHE_Methylcrotonyl-CoA_carboxylase_biotin-containing_subunit_OS=Fasciola_hepatica_OX=6192_GN=D915_002999_PE=4_SV=1	27.04	50.38	76.97	T0+T5+T10	0	0	0	ND.	--	--	--	--	--	--
maker-scaffold10x_1137_pilon-snap-gene-0.95-mRNA-1	A0A5B8ZUB3	A0A5B8ZUB3|A0A5B8ZUB3_FASGI_Cathepsin_B_OS=Fasciola_gigantica_OX=46835_GN=CatB_PE=2_SV=1	202.27	585.06	438.6	T0+T5+T10	0	0	0	ND.	1.14603	--	-0.788562	--	--	--
maker-scaffold10x_1137_pilon-snap-gene-0.96-mRNA-1	A0A504Y0R2	A0A504Y0R2|A0A504Y0R2_FASGI_THO_complex_subunit_2_(Fragment)_OS=Fasciola_gigantica_OX=46835_GN=FGIG_03714_PE=4_SV=1	5.06	15.66	18.81	T0+T5+T10	0	0	0	ND.	1.12081	1.22914	--	--	--	--
maker-scaffold10x_1137_pilon-snap-gene-0.99-mRNA-1	A0A504YUT1	A0A504YUT1|A0A504YUT1_FASGI_Extended_synaptotagmin-2-B_OS=Fasciola_gigantica_OX=46835_GN=FGIG_08474_PE=4_SV=1	5.41	10.75	15.13	T0+T5+T10	0	0	0	ND.	--	0.893232	--	--	--	--
maker-scaffold10x_1138_pilon-snap-gene-0.0-mRNA-1	A0A4E0R1G9	A0A4E0R1G9|A0A4E0R1G9_FASHE_Transmembrane_protein_11_mitochondrial_OS=Fasciola_hepatica_OX=6192_GN=D915_009011_PE=4_SV=1	21.6	22.87	38.35	T0+T5+T10	0	0	0	ND.	--	--	--	--	--	--
maker-scaffold10x_114_pilon-augustus-gene-0.74-mRNA-1	A0A4E0R5G0	A0A4E0R5G0|A0A4E0R5G0_FASHE_C2H2-type_domain-containing_protein_OS=Fasciola_hepatica_OX=6192_GN=D915_006081_PE=4_SV=1	0.43	0.88	1.13	T0+T5+T10	0	0	0	ND.	--	--	--	--	--	--
maker-scaffold10x_114_pilon-augustus-gene-0.75-mRNA-1	A0A504Z020	A0A504Z020|A0A504Z020_FASGI_Post-GPI_attachment_to_proteins_factor_2_OS=Fasciola_gigantica_OX=46835_GN=FGIG_00127_PE=4_SV=1	199.6	237.27	338.16	T0+T5+T10	0	0	0	ND.	--	--	--	--	--	--
maker-scaffold10x_114_pilon-augustus-gene-0.82-mRNA-1	A0A4E0R839	A0A4E0R839|A0A4E0R839_FASHE_NADPH--cytochrome_P450_reductase_OS=Fasciola_hepatica_OX=6192_GN=D915_006063_PE=3_SV=1	2	3.72	4.23	T0+T5+T10	0	0	0	ND.	--	--	--	--	--	--
maker-scaffold10x_114_pilon-augustus-gene-0.83-mRNA-1	A0A504YSC0	A0A504YSC0|A0A504YSC0_FASGI_CWF19_protein_2_OS=Fasciola_gigantica_OX=46835_GN=FGIG_06253_PE=4_SV=1	0.98	0.56	0.49	T0+T5+T10	0	0	0	ND.	--	--	--	--	--	--
maker-scaffold10x_114_pilon-snap-gene-0.100-mRNA-1	A0A4E0RZG1	A0A4E0RZG1|A0A4E0RZG1_FASHE_ATP-dependent_RNA_helicase_DBP9_OS=Fasciola_hepatica_OX=6192_GN=D915_001027_PE=4_SV=1	1.41	5.64	7.96	T0+T5+T10	0	0	0	ND.	1.38391	1.83366	--	--	--	--
maker-scaffold10x_114_pilon-snap-gene-0.101-mRNA-1	A0A4E0RPF9	A0A4E0RPF9|A0A4E0RPF9_FASHE_Calpain-2_catalytic_subunit_OS=Fasciola_hepatica_OX=6192_GN=D915_006737_PE=3_SV=1	74.95	49.24	26.24	T0+T5+T10	0	0	0	ND.	-0.963874	-1.95955	-0.93478	--	--	--
maker-scaffold10x_114_pilon-snap-gene-0.102-mRNA-1	A0A504YU28	A0A504YU28|A0A504YU28_FASGI_Erlin-2_OS=Fasciola_gigantica_OX=46835_GN=FGIG_07237_PE=4_SV=1	15.21	13.3	10.5	T0+T5+T10	0	0	0	ND.	--	-0.884307	--	--	--	--
maker-scaffold10x_114_pilon-snap-gene-0.90-mRNA-1	A0A4E0QZ87	A0A4E0QZ87|A0A4E0QZ87_FASHE_SERPIN_domain-containing_protein_OS=Fasciola_hepatica_OX=6192_GN=D915_008388_PE=3_SV=1	14.7	26.05	30.46	T0+T5+T10	0	0	0	ND.	--	--	--	--	--	--
maker-scaffold10x_114_pilon-snap-gene-0.91-mRNA-1	A0A4E0RIZ6	A0A4E0RIZ6|A0A4E0RIZ6_FASHE_WD_repeat-containing_protein_27_OS=Fasciola_hepatica_OX=6192_GN=D915_001026_PE=4_SV=1	9.54	15.21	27.6	T0+T5+T10	0	0	0	ND.	--	0.722184	--	--	--	--
maker-scaffold10x_114_pilon-snap-gene-0.92-mRNA-1	A0A4E0R6Q9	A0A4E0R6Q9|A0A4E0R6Q9_FASHE_NAD-dependent_deacetylase_sirtuin_4_OS=Fasciola_hepatica_OX=6192_GN=D915_006736_PE=4_SV=1	83.97	118.37	124.55	T0+T5+T10	0	0	0	ND.	--	--	--	--	--	--
maker-scaffold10x_114_pilon-snap-gene-0.93-mRNA-1	A0A4E0R5X6	A0A4E0R5X6|A0A4E0R5X6_FASHE_Leishmanolysin-like_peptidase_OS=Fasciola_hepatica_OX=6192_GN=D915_008069_PE=3_SV=1	1.11	2.92	3.79	T0+T5+T10	0	0	0	ND.	--	1.17824	--	--	--	--
maker-scaffold10x_114_pilon-snap-gene-0.95-mRNA-1	no hit	no hit	51.13	45.13	50.24	T0+T5+T10	0	0	0	ND.	-0.551117	-0.778088	--	--	--	--
maker-scaffold10x_114_pilon-snap-gene-0.97-mRNA-1	A0A4E0R9X2	A0A4E0R9X2|A0A4E0R9X2_FASHE_Putative_fgf_receptor_activating_protein_OS=Fasciola_hepatica_OX=6192_GN=D915_006062_PE=4_SV=1	3.9	4.83	2.15	T0+T5+T10	0	0	0	ND.	--	-1.92532	-1.62655	--	--	--
maker-scaffold10x_114_pilon-snap-gene-0.98-mRNA-1	A0A504YG57	A0A504YG57|A0A504YG57_FASGI_PCI_domain-containing_protein_2_OS=Fasciola_gigantica_OX=46835_GN=FGIG_09633_PE=4_SV=1	66.43	134.46	120.94	T0+T5+T10	0	0	0	ND.	--	--	--	--	--	--
maker-scaffold10x_1143_pilon-augustus-gene-0.30-mRNA-1	A0A4E0RCA0	A0A4E0RCA0|A0A4E0RCA0_FASHE_Serine/threonine-protein_kinase_SIK2_OS=Fasciola_hepatica_OX=6192_GN=D915_005230_PE=4_SV=1	71.84	71.39	47.97	T0+T5+T10	0	0	0	ND.	--	-1.23535	-0.89327	--	--	--
maker-scaffold10x_1143_pilon-augustus-gene-0.36-mRNA-1	H2KSX8	H2KSX8|H2KSX8_CLOSI_Protein_LTV1_(Fragment)_OS=Clonorchis_sinensis_OX=79923_GN=CLF_110675_PE=4_SV=1	11.34	13.69	16.72	T0+T5+T10	0	0	0	ND.	--	--	--	--	--	--
maker-scaffold10x_1143_pilon-pred_gff_StringTie-gene-0.49-mRNA-1	A0A504Y9Z1	A0A504Y9Z1|A0A504Y9Z1_FASGI_DUF4806_domain-containing_protein_OS=Fasciola_gigantica_OX=46835_GN=FGIG_09571_PE=4_SV=1	35.77	49.01	169.05	T0+T5+T10	0	0	0	ND.	--	1.5764	--	--	--	--
maker-scaffold10x_1143_pilon-snap-gene-0.0-mRNA-1	A0A4E0RJR6	A0A4E0RJR6|A0A4E0RJR6_FASHE_Cell_division_protein_kinase_OS=Fasciola_hepatica_OX=6192_GN=D915_008209_PE=3_SV=1	89.57	129.24	205.63	T0+T5+T10	0	0	0	ND.	--	0.43582	--	--	--	--
maker-scaffold10x_1143_pilon-snap-gene-0.2-mRNA-1	A0A4Z2DAW4	A0A4Z2DAW4|A0A4Z2DAW4_SCHJA_Protein_CNPPD1_isoform_5_OS=Schistosoma_japonicum_OX=6182_GN=EWB00_002802_PE=4_SV=1	62.36	60.08	67.07	T0+T5+T10	0	0	0	ND.	--	-0.549109	--	--	--	--
maker-scaffold10x_1143_pilon-snap-gene-0.3-mRNA-1	A0A504YCX7	A0A504YCX7|A0A504YCX7_FASGI_RNA_polymerase-associated_protein_LEO1_(Fragment)_OS=Fasciola_gigantica_OX=46835_GN=FGIG_10619_PE=4_SV=1	6.85	14.79	17.4	T0+T5+T10	0	0	0	ND.	--	--	--	--	--	--
maker-scaffold10x_1143_pilon-snap-gene-0.4-mRNA-1	A0A504YDR9	A0A504YDR9|A0A504YDR9_FASGI_Mitochondrial_folate_transporter/carrier_OS=Fasciola_gigantica_OX=46835_GN=FGIG_00618_PE=3_SV=1	97.11	143.1	175.94	T0+T5+T10	0	0	0	ND.	--	--	--	--	--	--
maker-scaffold10x_1143_pilon-snap-gene-0.5-mRNA-1	no hit	no hit	0.11	0.08	0	T0+T5	0	0	0	ND.	--	-5.31956	--	--	--	--
maker-scaffold10x_1143_pilon-snap-gene-0.8-mRNA-1	A0A4E0RLD9	A0A4E0RLD9|A0A4E0RLD9_FASHE_Putative_Zinc_finger_protein_OS=Fasciola_hepatica_OX=6192_GN=D915_007283_PE=4_SV=1	3.03	4.69	5.16	T0+T5+T10	0	0	0	ND.	--	--	--	--	--	--
maker-scaffold10x_1144_pilon-pred_gff_StringTie-gene-0.3-mRNA-1	no hit	no hit	3.23	3.45	7.98	T0+T5+T10	0	0	0	ND.	--	--	--	--	--	--
maker-scaffold10x_1145_pilon-snap-gene-0.0-mRNA-1	A0A4E0QX88	A0A4E0QX88|A0A4E0QX88_FASHE_PQ-loop_repeat-containing_protein_1_OS=Fasciola_hepatica_OX=6192_GN=D915_009489_PE=4_SV=1	42.53	50.16	56	T0+T5+T10	0	0	0	ND.	--	--	--	--	--	--
maker-scaffold10x_1145_pilon-snap-gene-0.3-mRNA-1	A0A4E0RXV4	A0A4E0RXV4|A0A4E0RXV4_FASHE_Metallophosphoesterase_1_OS=Fasciola_hepatica_OX=6192_GN=D915_008348_PE=4_SV=1	4.23	6.33	8.27	T0+T5+T10	0	0	0	ND.	--	--	--	--	--	--
maker-scaffold10x_1146_pilon-snap-gene-0.1-mRNA-1	A0A4E0R0G0	A0A4E0R0G0|A0A4E0R0G0_FASHE_NICE-3_protein_OS=Fasciola_hepatica_OX=6192_GN=D915_008199_PE=4_SV=1	2.2	13.89	14.01	T0+T5+T10	0	0	0	ND.	1.79223	1.63445	--	--	--	--
maker-scaffold10x_1148_pilon-snap-gene-0.9-mRNA-1	A0A2H1C602	A0A2H1C602|A0A2H1C602_FASHE_Arf-GAP_with_dual_PH_domain-containing_protein_1_OS=Fasciola_hepatica_OX=6192_GN=D915_006563_PE=4_SV=1	19.53	27.07	26.1	T0+T5+T10	0	0	0	ND.	--	--	--	--	--	--
maker-scaffold10x_1149_pilon-augustus-gene-0.49-mRNA-1	A0A4E0RCH0	A0A4E0RCH0|A0A4E0RCH0_FASHE_Solute_carrier_family_10_member_6_OS=Fasciola_hepatica_OX=6192_GN=D915_004176_PE=4_SV=1	9.41	16.86	22.13	T0+T5+T10	0	0	0	ND.	--	--	--	--	--	--
maker-scaffold10x_1149_pilon-augustus-gene-0.56-mRNA-1	A0A4E0R8X9	A0A4E0R8X9|A0A4E0R8X9_FASHE_Leucine_rich_repeat_containing_protein_LRR_OS=Fasciola_hepatica_OX=6192_GN=D915_005179_PE=4_SV=1	62.98	64.51	36.67	T0+T5+T10	0	0	0	ND.	--	-1.36761	-0.891605	--	--	--
maker-scaffold10x_1149_pilon-augustus-gene-0.69-mRNA-1	A0A4E0RK99	A0A4E0RK99|A0A4E0RK99_FASHE_Marvel-containing_potential_lipid_raft-associated_protein_OS=Fasciola_hepatica_OX=6192_GN=D915_000409_PE=4_SV=1	34.42	28.76	27.49	T0+T5+T10	0	0	0	ND.	--	-1.03963	--	--	--	--
maker-scaffold10x_1149_pilon-pred_gff_StringTie-gene-0.104-mRNA-1	A0A2H1BRE1	A0A2H1BRE1|A0A2H1BRE1_FASHE_Zinc_finger_CDGSH_domain-containing_protein_1_OS=Fasciola_hepatica_OX=6192_GN=D915_010960_PE=4_SV=1	229.57	170.91	189.08	T0+T5+T10	1046.02	783.75	1069.08	T0+T5+T10	-0.827348	-0.875481	--	--	--	--
maker-scaffold10x_1149_pilon-snap-gene-0.0-mRNA-1	A0A4E0RZZ6	A0A4E0RZZ6|A0A4E0RZZ6_FASHE_U3_small_nucleolar_RNA-associated_protein_11_OS=Fasciola_hepatica_OX=6192_GN=D915_004175_PE=3_SV=1	134.29	193.88	214.18	T0+T5+T10	0	0	0	ND.	--	--	--	--	--	--
maker-scaffold10x_1149_pilon-snap-gene-0.11-mRNA-1	A0A2H1BT13	A0A2H1BT13|A0A2H1BT13_FASHE_Sulfhydryl_oxidase_OS=Fasciola_hepatica_OX=6192_GN=D915_010582_PE=4_SV=1	180.02	174.58	279.21	T0+T5+T10	0	0	0	ND.	--	--	--	--	--	--
maker-scaffold10x_1149_pilon-snap-gene-0.13-mRNA-1	A0A4E0RG13	A0A4E0RG13|A0A4E0RG13_FASHE_Tyrosine-protein_kinase_OS=Fasciola_hepatica_OX=6192_GN=D915_004177_PE=3_SV=1	11.33	10.24	10.97	T0+T5+T10	0	0	0	ND.	--	-0.680194	--	--	--	--
maker-scaffold10x_1149_pilon-snap-gene-0.14-mRNA-1	A0A4E0RCK1	A0A4E0RCK1|A0A4E0RCK1_FASHE_Leucine_rich_repeat_containing_protein_LRR_OS=Fasciola_hepatica_OX=6192_GN=D915_005180_PE=4_SV=1	10.84	4.54	4.99	T0+T5+T10	0	0	0	ND.	-1.59082	-1.4793	--	--	--	--
maker-scaffold10x_1149_pilon-snap-gene-0.15-mRNA-1	no hit	no hit	27.43	49.83	51.58	T0+T5+T10	0	0	0	ND.	--	--	--	--	--	--
maker-scaffold10x_1149_pilon-snap-gene-0.16-mRNA-1	A0A504YWK2	A0A504YWK2|A0A504YWK2_FASGI_NADH_dehydrogenase_[ubiquinone]_1_beta_subcomplex_subunit_10_OS=Fasciola_gigantica_OX=46835_GN=FGIG_05846_PE=4_SV=1	1360.35	1608.95	1733.18	T0+T5+T10	0	0	0	ND.	--	--	--	--	--	--
maker-scaffold10x_1149_pilon-snap-gene-0.17-mRNA-1	A0A4E0RYM1	A0A4E0RYM1|A0A4E0RYM1_FASHE_Mitogen-activated_protein_kinase_kinase_kinase_4_OS=Fasciola_hepatica_OX=6192_GN=D915_005277_PE=4_SV=1	0.41	0.53	0.75	T0+T5+T10	0	0	0	ND.	--	--	--	--	--	--
maker-scaffold10x_1149_pilon-snap-gene-0.18-mRNA-1	A0A4E0RL69	A0A4E0RL69|A0A4E0RL69_FASHE_ATPase_H+_transporting_lysosomal_V0_subunit_B_OS=Fasciola_hepatica_OX=6192_GN=D915_002533_PE=3_SV=1	43.84	36.26	45.73	T0+T5+T10	0	0	0	ND.	-0.767288	-0.658361	--	--	--	--
maker-scaffold10x_1149_pilon-snap-gene-0.19-mRNA-1	A0A4E0RP77	A0A4E0RP77|A0A4E0RP77_FASHE_Egg_protein_OS=Fasciola_hepatica_OX=6192_GN=D915_000333_PE=4_SV=1	2.8	2.24	1.13	T0+T5+T10	0	0	0	ND.	--	--	--	--	--	--
maker-scaffold10x_1149_pilon-snap-gene-0.20-mRNA-1	A0A4E0S472	A0A4E0S472|A0A4E0S472_FASHE_SCY1_protein_2_OS=Fasciola_hepatica_OX=6192_GN=D915_000332_PE=4_SV=1	3.66	3.68	0.78	T0+T5+T10	0	0	0	ND.	--	-1.63948	--	--	--	--
maker-scaffold10x_1149_pilon-snap-gene-0.22-mRNA-1	A0A4E0RYC8	A0A4E0RYC8|A0A4E0RYC8_FASHE_Transport_protein_Sec24D_OS=Fasciola_hepatica_OX=6192_GN=D915_000330_PE=4_SV=1	9.32	29.7	22.11	T0+T5+T10	28.46	105.66	0	T0+T5	1.3511	0.700931	--	--	--	-1.97105
maker-scaffold10x_1149_pilon-snap-gene-0.23-mRNA-1	A0A4E0RJ14	A0A4E0RJ14|A0A4E0RJ14_FASHE_Suppressor_of_SWI4_1_OS=Fasciola_hepatica_OX=6192_GN=D915_008194_PE=4_SV=1	5.59	9	11.87	T0+T5+T10	0	0	0	ND.	--	--	--	--	--	--
maker-scaffold10x_1149_pilon-snap-gene-0.24-mRNA-1	A0A4E0RJ14	A0A4E0RJ14|A0A4E0RJ14_FASHE_Suppressor_of_SWI4_1_OS=Fasciola_hepatica_OX=6192_GN=D915_008194_PE=4_SV=1	0	0.65	0	T5	0	0	0	ND.	--	--	--	--	--	--
maker-scaffold10x_1149_pilon-snap-gene-0.2-mRNA-1	A0A4E0RED7	A0A4E0RED7|A0A4E0RED7_FASHE_Galectin-3-binding_protein_A_OS=Fasciola_hepatica_OX=6192_GN=D915_003855_PE=4_SV=1	1.1	0.25	0.51	T0+T5+T10	0	0	0	ND.	--	--	--	--	--	--
maker-scaffold10x_1149_pilon-snap-gene-0.3-mRNA-1	A0A4E0RFQ6	A0A4E0RFQ6|A0A4E0RFQ6_FASHE_Alpha-mannosidase_OS=Fasciola_hepatica_OX=6192_GN=D915_003854_PE=3_SV=1	0.19	0.11	0	T0+T5	0	0	0	ND.	--	--	--	--	--	--
maker-scaffold10x_1149_pilon-snap-gene-0.4-mRNA-1	A0A4E0RWH8	A0A4E0RWH8|A0A4E0RWH8_FASHE_Laminin_subunit_alpha-1_OS=Fasciola_hepatica_OX=6192_GN=D915_003379_PE=4_SV=1	0.28	0.23	0.06	T0+T5+T10	0	0	0	ND.	--	--	--	--	--	--
maker-scaffold10x_1149_pilon-snap-gene-0.6-mRNA-1	A0A504YQL6	A0A504YQL6|A0A504YQL6_FASGI_Leucine-rich_repeat-containing_protein_40_OS=Fasciola_gigantica_OX=46835_GN=FGIG_05845_PE=4_SV=1	3.09	4.59	6.49	T0+T5+T10	0	0	0	ND.	--	--	--	--	--	--
maker-scaffold10x_1149_pilon-snap-gene-0.8-mRNA-1	A0A4E0R8D0	A0A4E0R8D0|A0A4E0R8D0_FASHE_2_4-dienoyl-CoA_reductase_mitochondrial_OS=Fasciola_hepatica_OX=6192_GN=D915_005278_PE=4_SV=1	45.99	53.66	55.33	T0+T5+T10	0	0	0	ND.	--	-0.517943	--	--	--	--
maker-scaffold10x_1149_pilon-snap-gene-0.9-mRNA-1	A0A4E0RHG7	A0A4E0RHG7|A0A4E0RHG7_FASHE_Meckelin_OS=Fasciola_hepatica_OX=6192_GN=D915_002534_PE=4_SV=1	0.05	0.28	0	T0+T5	0	0	0	ND.	--	--	--	--	--	--
maker-scaffold10x_1154_pilon-snap-gene-0.0-mRNA-1	A0A4Z2D1M6	A0A4Z2D1M6|A0A4Z2D1M6_SCHJA_Cilia-and_flagella-associated_protein_OS=Schistosoma_japonicum_OX=6182_GN=EWB00_005367_PE=4_SV=1	0.06	0	0.21	T0+T10	0	0	0	ND.	--	--	--	--	--	--
maker-scaffold10x_116_pilon-augustus-gene-0.4-mRNA-1	no hit	no hit	0.05	0.22	0	T0+T5	0	0	0	ND.	--	--	--	--	--	--
maker-scaffold10x_116_pilon-augustus-gene-0.8-mRNA-1	A0A4E0R661	A0A4E0R661|A0A4E0R661_FASHE_Serine/threonine-protein_kinase_PAK_3_OS=Fasciola_hepatica_OX=6192_GN=D915_004654_PE=4_SV=1	1.78	2.35	2.76	T0+T5+T10	0	0	0	ND.	--	--	--	--	--	--
maker-scaffold10x_116_pilon-snap-gene-0.15-mRNA-1	A0A504YSZ8	A0A504YSZ8|A0A504YSZ8_FASGI_Alpha_crystallin-containing_small_heat_shock_protein_variant_NtermFhHSP35a_OS=Fasciola_gigantica_OX=46835_GN=FGIG_11620_PE=3_SV=1	76807.2	62823	38562.8	T0+T5+T10	138334	147545	123047	T0+T5+T10	-0.777751	-1.63254	-0.792765	--	--	-0.612849
maker-scaffold10x_116_pilon-snap-gene-0.16-mRNA-1	A0A4E0RBV7	A0A4E0RBV7|A0A4E0RBV7_FASHE_TBC1_domain-containing_protein_OS=Fasciola_hepatica_OX=6192_GN=D915_002987_PE=4_SV=1	5.38	4.7	5.63	T0+T5+T10	0	0	0	ND.	--	--	--	--	--	--
maker-scaffold10x_1160_pilon-augustus-gene-0.39-mRNA-1	A0A504Y954	A0A504Y954|A0A504Y954_FASGI_Putative_guanine_nucleotide-binding_protein_OS=Fasciola_gigantica_OX=46835_GN=FGIG_00790_PE=4_SV=1	0.26	0.03	0	T0+T5	0	0	0	ND.	--	--	--	--	--	--
maker-scaffold10x_1160_pilon-snap-gene-0.20-mRNA-1	A0A4E0RFU0	A0A4E0RFU0|A0A4E0RFU0_FASHE_Tubulin_gamma_chain_OS=Fasciola_hepatica_OX=6192_GN=D915_003352_PE=3_SV=1	41.78	73.09	129.26	T0+T5+T10	0	0	0	ND.	--	0.962358	--	--	--	--
maker-scaffold10x_1160_pilon-snap-gene-0.21-mRNA-1	A0A4E0RCJ4	A0A4E0RCJ4|A0A4E0RCJ4_FASHE_Alpha_actinin_sarcomeric_OS=Fasciola_hepatica_OX=6192_GN=D915_004041_PE=4_SV=1	5.94	3.96	2.53	T0+T5+T10	0	0	0	ND.	--	-1.72825	--	--	--	--
maker-scaffold10x_1160_pilon-snap-gene-0.24-mRNA-1	A0A4E0RG60	A0A4E0RG60|A0A4E0RG60_FASHE_Telomerase_Cajal_body_protein_1_OS=Fasciola_hepatica_OX=6192_GN=D915_004042_PE=4_SV=1	26.23	68.37	57.71	T0+T5+T10	0	0	0	ND.	--	--	--	--	--	--
maker-scaffold10x_1165_pilon-augustus-gene-0.1-mRNA-1	A0A4E0RKC5	A0A4E0RKC5|A0A4E0RKC5_FASHE_Ras_protein_Rab-10_OS=Fasciola_hepatica_OX=6192_GN=D915_000957_PE=4_SV=1	0	0.71	0.79	T5+T10	0	0	0	ND.	--	--	--	--	--	--
maker-scaffold10x_1165_pilon-snap-gene-0.17-mRNA-1	A0A4E0RQU8	A0A4E0RQU8|A0A4E0RQU8_FASHE_WD_repeat-containing_protein_7_OS=Fasciola_hepatica_OX=6192_GN=D915_000956_PE=4_SV=1	7.24	13.22	12.2	T0+T5+T10	0	0	0	ND.	--	--	--	--	--	--
maker-scaffold10x_1165_pilon-snap-gene-0.20-mRNA-1	no hit	no hit	0.47	1.17	0	T0+T5	0	0	0	ND.	--	--	--	--	--	--
maker-scaffold10x_1165_pilon-snap-gene-0.21-mRNA-1	A0A4E0RXQ2	A0A4E0RXQ2|A0A4E0RXQ2_FASHE_Gamma-soluble_NSF_attachment_protein_OS=Fasciola_hepatica_OX=6192_GN=D915_000960_PE=4_SV=1	0.11	0	0	T0	73.93	303.58	94.41	T0+T5+T10	--	--	--	--	--	--
maker-scaffold10x_1175_pilon-augustus-gene-0.5-mRNA-1	no hit	no hit	30.13	47.01	63.75	T0+T5+T10	0	0	0	ND.	--	--	--	--	--	--
maker-scaffold10x_1175_pilon-augustus-gene-0.6-mRNA-1	A0A504ZDS9	A0A504ZDS9|A0A504ZDS9_FASGI_Flagellar_radial_spoke_protein_3_OS=Fasciola_gigantica_OX=46835_GN=FGIG_10079_PE=4_SV=1	4.23	9.11	14.01	T0+T5+T10	76.77	0	0	T0	--	--	--	-5.23694	-5.39073	--
maker-scaffold10x_1175_pilon-snap-gene-0.20-mRNA-1	A0A4E0RNN2	A0A4E0RNN2|A0A4E0RNN2_FASHE_Ribonuclease_Z_chloroplastic_OS=Fasciola_hepatica_OX=6192_GN=D915_006659_PE=4_SV=1	47.94	84.45	106	T0+T5+T10	0	0	0	ND.	--	0.612935	--	--	--	--
maker-scaffold10x_1175_pilon-snap-gene-0.23-mRNA-1	no hit	no hit	0.94	0	0	T0	0	0	0	ND.	--	--	--	--	--	--
maker-scaffold10x_1175_pilon-snap-gene-0.25-mRNA-1	A0A4E0RB75	A0A4E0RB75|A0A4E0RB75_FASHE_DNA_polymerase_OS=Fasciola_hepatica_OX=6192_GN=D915_004763_PE=4_SV=1	0.09	0.25	0.04	T0+T5+T10	0	0	0	ND.	--	--	--	--	--	--
maker-scaffold10x_1175_pilon-snap-gene-0.27-mRNA-1	no hit	no hit	127.76	94.99	65.28	T0+T5+T10	0	0	0	ND.	-0.945123	-1.52531	--	--	--	--
maker-scaffold10x_1176_pilon-augustus-gene-0.7-mRNA-1	A0A4E0RGZ9	A0A4E0RGZ9|A0A4E0RGZ9_FASHE_Nuclear_receptor_subfamily_2_group_E_member_1_OS=Fasciola_hepatica_OX=6192_GN=D915_002792_PE=3_SV=1	0.25	0.28	3.18	T0+T5+T10	0	0	0	ND.	--	3.05311	--	--	--	--
maker-scaffold10x_1176_pilon-snap-gene-0.16-mRNA-1	A0A4E0RFF0	A0A4E0RFF0|A0A4E0RFF0_FASHE_Phosducin_protein_3_OS=Fasciola_hepatica_OX=6192_GN=D915_002790_PE=4_SV=1	139.38	111.53	108.84	T0+T5+T10	0	0	0	ND.	-0.741274	-1.12895	--	--	--	--
maker-scaffold10x_1176_pilon-snap-gene-0.17-mRNA-1	no hit	no hit	11.91	9.34	6.11	T0+T5+T10	0	0	0	ND.	--	-1.81283	--	--	--	--
maker-scaffold10x_1176_pilon-snap-gene-0.19-mRNA-1	A0A4E0RFM3	A0A4E0RFM3|A0A4E0RFM3_FASHE_Putative_sodium-coupled_neutral_amino_acid_transporter_10_OS=Fasciola_hepatica_OX=6192_GN=D915_002793_PE=4_SV=1	8.95	22.79	41.27	T0+T5+T10	0	0	0	ND.	0.959427	1.40339	--	--	--	--
maker-scaffold10x_1178_pilon-augustus-gene-0.59-mRNA-1	A0A4E0S471	A0A4E0S471|A0A4E0S471_FASHE_Putative_deferrochelatase/peroxidase_YfeX_OS=Fasciola_hepatica_OX=6192_GN=D915_000373_PE=4_SV=1	26.35	9.77	11.52	T0+T5+T10	0	20.92	0	T5	-1.82553	-2.02113	--	--	--	--
maker-scaffold10x_1178_pilon-augustus-gene-0.61-mRNA-1	A0A4Z2CN44	A0A4Z2CN44|A0A4Z2CN44_SCHJA_UPF0193_protein_EVG1_isoform_1_OS=Schistosoma_japonicum_OX=6182_GN=EWB00_009139_PE=4_SV=1	4.65	1.29	2.07	T0+T5+T10	0	0	0	ND.	--	-1.36171	--	--	--	--
maker-scaffold10x_1178_pilon-augustus-gene-0.64-mRNA-1	no hit	no hit	2.52	0.26	0.49	T0+T5+T10	0	0	0	ND.	--	--	--	--	--	--
maker-scaffold10x_1178_pilon-augustus-gene-0.66-mRNA-1	A0A4E0RP70	A0A4E0RP70|A0A4E0RP70_FASHE_Lipoma_HMGIC_fusion_partner_OS=Fasciola_hepatica_OX=6192_GN=D915_000374_PE=4_SV=1	3.79	17.1	32.41	T0+T5+T10	0	0	0	ND.	1.6885	2.35543	--	--	--	--
maker-scaffold10x_1178_pilon-pred_gff_StringTie-gene-0.16-mRNA-1	no hit	no hit	271.32	500.03	842.72	T0+T5+T10	0	0	0	ND.	--	1.09291	0.709092	--	--	--
maker-scaffold10x_1178_pilon-snap-gene-0.32-mRNA-1	H2KQZ1	H2KQZ1|H2KQZ1_CLOSI_Centrosomal_protein_of_85_kDa_OS=Clonorchis_sinensis_OX=79923_GN=CLF_105077_PE=4_SV=1	3.33	7.49	9.18	T0+T5+T10	0	0	0	ND.	--	--	--	--	--	--
maker-scaffold10x_1178_pilon-snap-gene-0.34-mRNA-1	A0A504YKF4	A0A504YKF4|A0A504YKF4_FASGI_Heterogeneous_nuclear_ribonucleoprotein_A/B_OS=Fasciola_gigantica_OX=46835_GN=FGIG_08573_PE=4_SV=1	203.56	389.61	385.89	T0+T5+T10	106.46	113.27	83.4	T0+T5+T10	0.488881	--	--	--	--	--
maker-scaffold10x_1178_pilon-snap-gene-0.36-mRNA-1	no hit	no hit	0.26	0	0	T0	0	0	0	ND.	--	--	--	--	--	--
maker-scaffold10x_1178_pilon-snap-gene-0.38-mRNA-1	no hit	no hit	18.56	12.94	5.53	T0+T5+T10	0	0	0	ND.	--	-2.26343	--	--	--	--
maker-scaffold10x_1178_pilon-snap-gene-0.42-mRNA-1	A0A504YI42	A0A504YI42|A0A504YI42_FASGI_DTW_domain-containing_protein_2_(Fragment)_OS=Fasciola_gigantica_OX=46835_GN=FGIG_08572_PE=4_SV=1	3.91	3.08	3.82	T0+T5+T10	0	0	0	ND.	--	--	--	--	--	--
maker-scaffold10x_1178_pilon-snap-gene-0.43-mRNA-1	A0A4E0R8D4	A0A4E0R8D4|A0A4E0R8D4_FASHE_SWI/SNF_complex_subunit_SMARCC2_OS=Fasciola_hepatica_OX=6192_GN=D915_006904_PE=4_SV=1	14.56	66.07	61.13	T0+T5+T10	0	0	0	ND.	1.40556	1.42667	--	--	--	--
maker-scaffold10x_1178_pilon-snap-gene-0.44-mRNA-1	A0A4E0R8D4	A0A4E0R8D4|A0A4E0R8D4_FASHE_SWI/SNF_complex_subunit_SMARCC2_OS=Fasciola_hepatica_OX=6192_GN=D915_006904_PE=4_SV=1	0.4	0	0	T0	0	0	0	ND.	--	--	--	--	--	--
maker-scaffold10x_1178_pilon-snap-gene-0.45-mRNA-1	A0A4E0S453	A0A4E0S453|A0A4E0S453_FASHE_Bestrophin_homolog_OS=Fasciola_hepatica_OX=6192_GN=D915_000472_PE=3_SV=1	0.31	0	0.26	T0+T10	0	0	0	ND.	--	--	--	--	--	--
maker-scaffold10x_118_pilon-snap-gene-0.26-mRNA-1	no hit	no hit	2.41	2.82	1.67	T0+T5+T10	0	0	0	ND.	--	--	--	--	--	--
maker-scaffold10x_118_pilon-snap-gene-0.27-mRNA-1	A0A4E0R319	A0A4E0R319|A0A4E0R319_FASHE_Chromodomain-helicase-DNA-binding_protein_1_OS=Fasciola_hepatica_OX=6192_GN=D915_008614_PE=4_SV=1	36.03	60.84	64.26	T0+T5+T10	0	0	0	ND.	0.499781	--	--	--	--	--
maker-scaffold10x_118_pilon-snap-gene-0.28-mRNA-1	A0A2H1BZH3	A0A2H1BZH3|A0A2H1BZH3_FASHE_Thymidylate_kinase_251L_OS=Fasciola_hepatica_OX=6192_GN=D915_008813_PE=4_SV=1	11.95	17.6	30.69	T0+T5+T10	0	0	0	ND.	--	--	--	--	--	--
maker-scaffold10x_118_pilon-snap-gene-0.29-mRNA-1	A0A504YPP2	A0A504YPP2|A0A504YPP2_FASGI_Cytosolic_purine_5'_nucleotidase_OS=Fasciola_gigantica_OX=46835_GN=FGIG_02845_PE=4_SV=1	0.46	0.94	0.22	T0+T5+T10	0	0	0	ND.	--	--	--	--	--	--
maker-scaffold10x_118_pilon-snap-gene-0.30-mRNA-1	A0A4E0RJQ1	A0A4E0RJQ1|A0A4E0RJQ1_FASHE_DUF89_domain-containing_protein_OS=Fasciola_hepatica_OX=6192_GN=D915_007976_PE=4_SV=1	3.27	3.54	7.17	T0+T5+T10	0	0	0	ND.	--	--	--	--	--	--
maker-scaffold10x_118_pilon-snap-gene-0.31-mRNA-1	A0A4E0RB09	A0A4E0RB09|A0A4E0RB09_FASHE_Serine/threonine-protein_phosphatase_OS=Fasciola_hepatica_OX=6192_GN=D915_005940_PE=4_SV=1	0.5	0	0.16	T0+T10	0	0	0	ND.	--	--	--	--	--	--
maker-scaffold10x_118_pilon-snap-gene-0.32-mRNA-1	A0A4E0RTW5	A0A4E0RTW5|A0A4E0RTW5_FASHE_Protein_Srpk2_OS=Fasciola_hepatica_OX=6192_GN=D915_004359_PE=4_SV=1	27.1	37.5	39.03	T0+T5+T10	0	0	0	ND.	--	--	--	--	--	--
maker-scaffold10x_118_pilon-snap-gene-0.33-mRNA-1	no hit	no hit	15.13	22.5	28.12	T0+T5+T10	0	0	0	ND.	--	--	--	--	--	--
maker-scaffold10x_1181_pilon-augustus-gene-0.52-mRNA-1	no hit	no hit	4.26	0.17	0	T0+T5	0	0	0	ND.	-4.83917	-5.05063	--	--	--	--
maker-scaffold10x_1181_pilon-pred_gff_StringTie-gene-0.25-mRNA-1	A0A2H1CX76	A0A2H1CX76|A0A2H1CX76_FASHE_Zinc_finger,_C2H2_type_OS=Fasciola_hepatica_OX=6192_GN=D915_00188_PE=4_SV=1	1.38	2.26	1.87	T0+T5+T10	0	0	0	ND.	--	--	--	--	--	--
maker-scaffold10x_1181_pilon-snap-gene-0.1-mRNA-1	A0A504Y7Q2	A0A504Y7Q2|A0A504Y7Q2_FASGI_Hydrocephalus-inducing_protein_OS=Fasciola_gigantica_OX=46835_GN=FGIG_05159_PE=4_SV=1	0.37	0.45	0.51	T0+T5+T10	0	0	0	ND.	--	--	--	--	--	--
maker-scaffold10x_1181_pilon-snap-gene-0.2-mRNA-1	A0A504YJH9	A0A504YJH9|A0A504YJH9_FASGI_Putative_synapsin_OS=Fasciola_gigantica_OX=46835_GN=FGIG_01253_PE=4_SV=1	0	0	0.52	T10	0	0	0	ND.	--	--	--	--	--	--
maker-scaffold10x_1181_pilon-snap-gene-0.4-mRNA-1	A0A504YUE7	A0A504YUE7|A0A504YUE7_FASGI_Importin-9_(Fragment)_OS=Fasciola_gigantica_OX=46835_GN=FGIG_06131_PE=4_SV=1	7.04	19.1	17.81	T0+T5+T10	0	0	0	ND.	--	--	--	--	--	--
maker-scaffold10x_1181_pilon-snap-gene-0.5-mRNA-1	A0A2H1CXB9	A0A2H1CXB9|A0A2H1CXB9_FASHE_Oxidoreductase,_aldo/keto_reductase_family_protein_OS=Fasciola_hepatica_OX=6192_GN=D915_00197_PE=4_SV=1	3.53	8.14	15.18	T0+T5+T10	0	0	0	ND.	--	1.31919	--	--	--	--
maker-scaffold10x_1181_pilon-snap-gene-0.6-mRNA-1	A0A4E0RS60	A0A4E0RS60|A0A4E0RS60_FASHE_WDR96_OS=Fasciola_hepatica_OX=6192_GN=D915_000131_PE=4_SV=1	0.15	0	0	T0	0	0	0	ND.	--	--	--	--	--	--
maker-scaffold10x_1184_pilon-snap-gene-0.30-mRNA-1	A0A2H1C079	A0A2H1C079|A0A2H1C079_FASHE_TPR_REGION_domain-containing_protein_OS=Fasciola_hepatica_OX=6192_GN=D915_008527_PE=4_SV=1	3.73	0.85	0	T0+T5	0	0	0	ND.	--	-4.31212	--	--	--	--
maker-scaffold10x_1184_pilon-snap-gene-0.31-mRNA-1	A0A2H1BZ78	A0A2H1BZ78|A0A2H1BZ78_FASHE_Glutathione_S-transferase_protein_(Fragment)_OS=Fasciola_hepatica_OX=6192_GN=D915_12658_PE=4_SV=1	0.08	1.27	0.98	T0+T5+T10	51.45	71.13	81.53	T0+T5+T10	3.45616	--	--	--	--	0.770805
maker-scaffold10x_1184_pilon-snap-gene-0.32-mRNA-1	A0A2H1C079	A0A2H1C079|A0A2H1C079_FASHE_TPR_REGION_domain-containing_protein_OS=Fasciola_hepatica_OX=6192_GN=D915_008527_PE=4_SV=1	9.34	11.05	1.07	T0+T5+T10	0	0	0	ND.	--	--	--	--	--	--
maker-scaffold10x_1184_pilon-snap-gene-0.33-mRNA-1	A0A4E0R337	A0A4E0R337|A0A4E0R337_FASHE_Heterotrimeric_GTP-binding_protein_alpha_subunit_G-alpha-q_OS=Fasciola_hepatica_OX=6192_GN=D915_007159_PE=4_SV=1	56.69	47.25	43.96	T0+T5+T10	0	97.83	0	T5	-0.586043	-1.14847	--	--	--	--
maker-scaffold10x_1184_pilon-snap-gene-0.34-mRNA-1	A0A2H1C5N4	A0A2H1C5N4|A0A2H1C5N4_FASHE_Cathepsin_L_OS=Fasciola_hepatica_OX=6192_GN=D915_006684_PE=3_SV=1	1157.89	963.85	712.57	T0+T5+T10	240.05	256.38	271.49	T0+T5+T10	-0.64925	-1.25113	--	--	--	--
maker-scaffold10x_1184_pilon-snap-gene-0.35-mRNA-1	A0A4E0RZQ4	A0A4E0RZQ4|A0A4E0RZQ4_FASHE_Chromodomain-helicase-DNA-binding_protein_7_OS=Fasciola_hepatica_OX=6192_GN=D915_006408_PE=4_SV=1	5.97	16.97	18.02	T0+T5+T10	0	0	0	ND.	1.13824	1.05876	--	--	--	--
maker-scaffold10x_1186_pilon-snap-gene-0.8-mRNA-1	A0A4S2LP75	A0A4S2LP75|A0A4S2LP75_OPIFE_Protein_kinase_domain-containing_protein_OS=Opisthorchis_felineus_OX=147828_GN=CRM22_005833_PE=4_SV=1	24.28	17.74	10.3	T0+T5+T10	0	0	0	ND.	-0.912683	-1.70236	-0.727736	--	--	--
maker-scaffold10x_1186_pilon-snap-gene-0.9-mRNA-1	A0A4E0RKB9	A0A4E0RKB9|A0A4E0RKB9_FASHE_Cilia-and_flagella-associated_protein_58_OS=Fasciola_hepatica_OX=6192_GN=D915_008043_PE=4_SV=1	0.93	0	0	T0	0	0	0	ND.	--	--	--	--	--	--
maker-scaffold10x_1188_pilon-pred_gff_StringTie-gene-0.27-mRNA-1	no hit	no hit	23.94	38.69	52.58	T0+T5+T10	0	0	0	ND.	--	0.648699	--	--	--	--
maker-scaffold10x_1188_pilon-snap-gene-0.41-mRNA-1	A0A4E0RYG3	A0A4E0RYG3|A0A4E0RYG3_FASHE_Proviral_integration_site_1_OS=Fasciola_hepatica_OX=6192_GN=D915_000232_PE=4_SV=1	10.13	15.27	17.03	T0+T5+T10	0	0	0	ND.	--	--	--	--	--	--
maker-scaffold10x_1189_pilon-augustus-gene-0.144-mRNA-1	A0A4E0R4N4	A0A4E0R4N4|A0A4E0R4N4_FASHE_Elongation_of_very_long_chain_fatty_acids_protein_OS=Fasciola_hepatica_OX=6192_GN=D915_006030_PE=3_SV=1	1.67	5.94	7	T0+T5+T10	0	0	0	ND.	--	1.3965	--	--	--	--
maker-scaffold10x_1189_pilon-augustus-gene-0.146-mRNA-1	A0A4E0RYF2	A0A4E0RYF2|A0A4E0RYF2_FASHE_Sec39_domain-containing_protein_OS=Fasciola_hepatica_OX=6192_GN=D915_000279_PE=4_SV=1	1.88	2.3	3.93	T0+T5+T10	0	0	0	ND.	--	--	--	--	--	--
maker-scaffold10x_1189_pilon-augustus-gene-0.150-mRNA-1	A0A4E0RNM5	A0A4E0RNM5|A0A4E0RNM5_FASHE_E3_SUMO-protein_ligase_pli1_OS=Fasciola_hepatica_OX=6192_GN=D915_000642_PE=4_SV=1	0.06	0.23	0.26	T0+T5+T10	0	0	0	ND.	--	--	--	--	--	--
maker-scaffold10x_1189_pilon-augustus-gene-0.157-mRNA-1	A0A504YG68	A0A504YG68|A0A504YG68_FASGI_Protein_boule_OS=Fasciola_gigantica_OX=46835_GN=FGIG_00681_PE=4_SV=1	47.64	82.18	95.1	T0+T5+T10	0	0	0	ND.	0.441053	--	--	--	--	--
maker-scaffold10x_1189_pilon-augustus-gene-0.170-mRNA-1	A0A4E0R506	A0A4E0R506|A0A4E0R506_FASHE_39S_ribosomal_protein_L40_mitochondrial_OS=Fasciola_hepatica_OX=6192_GN=D915_006357_PE=4_SV=1	42.06	79.57	115.6	T0+T5+T10	0	0	0	ND.	--	0.781959	--	--	--	--
maker-scaffold10x_1189_pilon-snap-gene-0.102-mRNA-1	A0A4E0RY85	A0A4E0RY85|A0A4E0RY85_FASHE_D(3)_dopamine_receptor_OS=Fasciola_hepatica_OX=6192_GN=D915_005782_PE=3_SV=1	0.07	0	0	T0	0	0	0	ND.	--	--	--	--	--	--
maker-scaffold10x_1189_pilon-snap-gene-0.103-mRNA-1	A0A5J4ND45	A0A5J4ND45|A0A5J4ND45_9TREM_Small_subunit_ribosomal_protein_S27e_OS=Paragonimus_westermani_OX=34504_GN=DEA37_0014970_PE=3_SV=1	1671.11	2523.61	4768.95	T0+T5+T10	1150.35	1343.06	1301.82	T0+T5+T10	--	0.992171	0.757411	--	--	--
maker-scaffold10x_1189_pilon-snap-gene-0.105-mRNA-1	A0A4E0RVB3	A0A4E0RVB3|A0A4E0RVB3_FASHE_Protein_unc-13_protein_B_OS=Fasciola_hepatica_OX=6192_GN=D915_004168_PE=4_SV=1	9.93	13.15	8.59	T0+T5+T10	0	0	0	ND.	--	-0.929777	-0.787515	--	--	--
maker-scaffold10x_1189_pilon-snap-gene-0.106-mRNA-1	A0A4E0R1U6	A0A4E0R1U6|A0A4E0R1U6_FASHE_Isocitrate_dehydrogenase_[NAD]_subunit,_mitochondrial_OS=Fasciola_hepatica_OX=6192_GN=D915_008171_PE=3_SV=1	41.31	49.64	50.13	T0+T5+T10	0	0	0	ND.	--	--	--	--	--	--
maker-scaffold10x_1189_pilon-snap-gene-0.107-mRNA-1	A0A4E0RXB0	A0A4E0RXB0|A0A4E0RXB0_FASHE_Valyl_tRNA_synthetase_OS=Fasciola_hepatica_OX=6192_GN=D915_006356_PE=4_SV=1	5.7	7.64	12.14	T0+T5+T10	34.61	74.09	5.38	T0+T5+T10	--	--	--	--	--	--
maker-scaffold10x_1189_pilon-snap-gene-0.109-mRNA-1	A0A504Y6X7	A0A504Y6X7|A0A504Y6X7_FASGI_Innexin_OS=Fasciola_gigantica_OX=46835_GN=inx_PE=3_SV=1	0	0	0.53	T10	0	0	0	ND.	--	--	--	--	--	--
maker-scaffold10x_1189_pilon-snap-gene-0.110-mRNA-1	A0A4E0RKH0	A0A4E0RKH0|A0A4E0RKH0_FASHE_Protein_couch_potato_OS=Fasciola_hepatica_OX=6192_GN=D915_000277_PE=4_SV=1	0.67	41.01	48.4	T0+T5+T10	0	0	0	ND.	5.90686	5.8196	--	--	--	--
maker-scaffold10x_1189_pilon-snap-gene-0.116-mRNA-1	no hit	no hit	219.57	189.36	107.52	T0+T5+T10	0	0	0	ND.	-0.544412	-1.28468	--	--	--	--
maker-scaffold10x_1189_pilon-snap-gene-0.89-mRNA-1	no hit	no hit	21.36	40.72	48.56	T0+T5+T10	0	0	0	ND.	--	--	--	--	--	--
maker-scaffold10x_1189_pilon-snap-gene-0.90-mRNA-1	A0A183AWH2	A0A183AWH2|A0A183AWH2_9TREM_KH_domain-containing_protein_OS=Echinostoma_caproni_OX=27848_GN=ECPE_LOCUS11307_PE=4_SV=1	127.98	119.75	79.91	T0+T5+T10	0	0	0	ND.	-0.588396	-1.34404	-0.690772	--	--	--
maker-scaffold10x_1189_pilon-snap-gene-0.92-mRNA-1	no hit	no hit	3.2	2.75	1.63	T0+T5+T10	0	0	0	ND.	--	-1.68434	--	--	--	--
maker-scaffold10x_1189_pilon-snap-gene-0.95-mRNA-1	A0A4E0S423	A0A4E0S423|A0A4E0S423_FASHE_Endostatin_domain-containing_protein_OS=Fasciola_hepatica_OX=6192_GN=D915_000641_PE=4_SV=1	0	0.23	0	T5	0	0	0	ND.	--	--	--	--	--	--
maker-scaffold10x_1189_pilon-snap-gene-0.96-mRNA-1	no hit	no hit	0.96	1.31	2.12	T0+T5+T10	0	0	0	ND.	--	--	--	--	--	--
maker-scaffold10x_119_pilon-augustus-gene-0.89-mRNA-1	A0A4E0RBD7	A0A4E0RBD7|A0A4E0RBD7_FASHE_Charged_multivesicular_body_protein_1_OS=Fasciola_hepatica_OX=6192_GN=D915_004595_PE=4_SV=1	0.62	0.55	3.74	T0+T5+T10	0	0	0	ND.	--	--	--	--	--	--
maker-scaffold10x_119_pilon-pred_gff_StringTie-gene-0.45-mRNA-1	no hit	no hit	3.45	5.1	5.28	T0+T5+T10	0	0	0	ND.	--	--	--	--	--	--
maker-scaffold10x_119_pilon-snap-gene-0.0-mRNA-1	A0A2H1CW05	A0A2H1CW05|A0A2H1CW05_FASHE_Leptin_receptor_overlapping_transcript_OS=Fasciola_hepatica_OX=6192_GN=D915_000492_PE=4_SV=1	256.99	254.23	234.77	T0+T5+T10	0	0	0	ND.	--	-0.766833	--	--	--	--
maker-scaffold10x_119_pilon-snap-gene-0.10-mRNA-1	A0A504YMW2	A0A504YMW2|A0A504YMW2_FASGI_Lysine-specific_demethylase_4A_OS=Fasciola_gigantica_OX=46835_GN=FGIG_11638_PE=4_SV=1	7.87	35.71	24.87	T0+T5+T10	0	0	0	ND.	1.59807	0.977447	--	--	--	--
maker-scaffold10x_119_pilon-snap-gene-0.11-mRNA-1	A0A4E0RFG5	A0A4E0RFG5|A0A4E0RFG5_FASHE_Stromal_membrane-associated_protein_1_OS=Fasciola_hepatica_OX=6192_GN=D915_002772_PE=4_SV=1	7.9	11.93	12.67	T0+T5+T10	0	0	0	ND.	--	--	--	--	--	--
maker-scaffold10x_119_pilon-snap-gene-0.13-mRNA-1	no hit	no hit	46.57	186.64	169.11	T0+T5+T10	0	0	0	ND.	1.52961	1.02448	--	--	--	--
maker-scaffold10x_119_pilon-snap-gene-0.1-mRNA-1	A0A4E0S450	A0A4E0S450|A0A4E0S450_FASHE_Neural-cadherin_OS=Fasciola_hepatica_OX=6192_GN=D915_000491_PE=4_SV=1	0.14	0.27	10.48	T0+T5+T10	0	0	0	ND.	--	6.08836	--	--	--	--
maker-scaffold10x_119_pilon-snap-gene-0.2-mRNA-1	no hit	no hit	0.55	0.23	0.44	T0+T5+T10	0	0	0	ND.	--	--	--	--	--	--
maker-scaffold10x_119_pilon-snap-gene-0.3-mRNA-1	A0A2H1BUT0	A0A2H1BUT0|A0A2H1BUT0_FASHE_Ribonucleoside-diphosphate_reductase_small_subunit_OS=Fasciola_hepatica_OX=6192_GN=D915_009802_PE=4_SV=1	206.01	124.9	108.22	T0+T5+T10	157.77	230.44	252.54	T0+T5+T10	-1.24135	-1.69414	--	--	--	--
maker-scaffold10x_119_pilon-snap-gene-0.4-mRNA-1	no hit	no hit	2.07	11.06	22.15	T0+T5+T10	0	0	0	ND.	1.96519	2.48346	--	--	--	--
maker-scaffold10x_119_pilon-snap-gene-0.5-mRNA-1	A0A4E0S425	A0A4E0S425|A0A4E0S425_FASHE_Dihydrolipoamide_acetyltransferase_component_of_pyruvate_dehydrogenase_complex_OS=Fasciola_hepatica_OX=6192_GN=D915_000588_PE=3_SV=1	0.12	0	0	T0	74.44	50.33	0	T0+T5	--	--	--	--	-5.56887	-4.35357
maker-scaffold10x_119_pilon-snap-gene-0.6-mRNA-1	A0A4E0S1F1	A0A4E0S1F1|A0A4E0S1F1_FASHE_GRIP_domain-containing_protein_OS=Fasciola_hepatica_OX=6192_GN=D915_002771_PE=4_SV=1	3.71	4.87	8.81	T0+T5+T10	0	0	0	ND.	--	--	--	--	--	--
maker-scaffold10x_1190_pilon-augustus-gene-0.54-mRNA-1	A0A4E0RWV6	A0A4E0RWV6|A0A4E0RWV6_FASHE_RNA_helicase_OS=Fasciola_hepatica_OX=6192_GN=D915_009229_PE=3_SV=1	1.76	4.08	4.5	T0+T5+T10	0	0	0	ND.	--	--	--	--	--	--
maker-scaffold10x_1190_pilon-augustus-gene-0.56-mRNA-1	A0A504YMU2	A0A504YMU2|A0A504YMU2_FASGI_Syndecan_binding_protein_(Syntenin)_2_OS=Fasciola_gigantica_OX=46835_GN=FGIG_00892_PE=4_SV=1	2736.57	2417.55	1636.14	T0+T5+T10	46.62	100.29	0	T0+T5	-0.773219	-1.52298	-0.685612	--	--	--
maker-scaffold10x_1190_pilon-snap-gene-0.31-mRNA-1	A0A4E0RCG1	A0A4E0RCG1|A0A4E0RCG1_FASHE_Marvel-containing_potential_lipid_raft-associated_protein_OS=Fasciola_hepatica_OX=6192_GN=D915_004090_PE=4_SV=1	163.79	176.13	208.61	T0+T5+T10	251.74	345.23	0	T0+T5	--	-0.369489	--	--	--	--
maker-scaffold10x_1190_pilon-snap-gene-0.33-mRNA-1	no hit	no hit	0.14	1.58	1.53	T0+T5+T10	0	0	0	ND.	2.97831	2.41166	--	--	--	--
maker-scaffold10x_1190_pilon-snap-gene-0.34-mRNA-1	no hit	no hit	8.1	3.55	5.95	T0+T5+T10	0	0	0	ND.	--	--	--	--	--	--
maker-scaffold10x_1190_pilon-snap-gene-0.36-mRNA-1	A0A4E0QZ44	A0A4E0QZ44|A0A4E0QZ44_FASHE_Amyloid_beta_protein_binding_protein_1_OS=Fasciola_hepatica_OX=6192_GN=D915_009664_PE=4_SV=1	29.55	40.32	42.65	T0+T5+T10	0	0	0	ND.	--	--	--	--	--	--
maker-scaffold10x_1190_pilon-snap-gene-0.38-mRNA-1	A0A4E0S2L2	A0A4E0S2L2|A0A4E0S2L2_FASHE_Serine/threonine-protein_phosphatase_OS=Fasciola_hepatica_OX=6192_GN=D915_001447_PE=3_SV=1	0.42	0.21	0.82	T0+T5+T10	0	0	0	ND.	--	--	--	--	--	--
maker-scaffold10x_1191_pilon-augustus-gene-0.8-mRNA-1	A0A2H1CWL5	A0A2H1CWL5|A0A2H1CWL5_FASHE_Putative_adenine_phosphoribosyltransferase_OS=Fasciola_hepatica_OX=6192_GN=D915_01149_PE=3_SV=1	730.31	632.79	426.23	T0+T5+T10	0	0	0	ND.	-0.762485	-1.48386	-0.657991	--	--	--
maker-scaffold10x_1191_pilon-snap-gene-0.0-mRNA-1	A0A4E0RNC2	A0A4E0RNC2|A0A4E0RNC2_FASHE_Cytochrome_b561_domain-containing_protein_OS=Fasciola_hepatica_OX=6192_GN=D915_000826_PE=4_SV=1	12.22	14.56	14.75	T0+T5+T10	0	0	0	ND.	--	--	--	--	--	--
maker-scaffold10x_1193_pilon-pred_gff_StringTie-gene-0.9-mRNA-1	A0A2H1CF31	A0A2H1CF31|A0A2H1CF31_FASHE_Myophilin_OS=Fasciola_hepatica_OX=6192_GN=D915_004340_PE=4_SV=1	45.51	222.28	788.19	T0+T5+T10	0	0	0	ND.	1.92661	3.41353	--	--	--	--
maker-scaffold10x_1193_pilon-snap-gene-0.4-mRNA-1	A0A504YC32	A0A504YC32|A0A504YC32_FASGI_DnaJ_protein_like_protein_1_OS=Fasciola_gigantica_OX=46835_GN=FGIG_06585_PE=4_SV=1	16.55	20.65	21.27	T0+T5+T10	138.46	267.04	103.51	T0+T5+T10	--	--	--	--	--	--
maker-scaffold10x_1194_pilon-augustus-gene-0.0-mRNA-1	A0A4E0RYB5	A0A4E0RYB5|A0A4E0RYB5_FASHE_AP-2_complex_subunit_alpha_OS=Fasciola_hepatica_OX=6192_GN=D915_007766_PE=3_SV=1	5.19	1.67	0.93	T0+T5+T10	0	0	0	ND.	-1.65241	-2.96197	--	--	--	--
maker-scaffold10x_1194_pilon-augustus-gene-0.15-mRNA-1	no hit	no hit	2.51	1.31	1.66	T0+T5+T10	0	0	0	ND.	--	--	--	--	--	--
maker-scaffold10x_1194_pilon-augustus-gene-0.9-mRNA-1	A0A4E0RJX8	A0A4E0RJX8|A0A4E0RJX8_FASHE_Exocyst_complex_component_1_OS=Fasciola_hepatica_OX=6192_GN=D915_000514_PE=4_SV=1	1.18	7.14	17.88	T0+T5+T10	0	0	0	ND.	1.74611	3.00759	1.3349	--	--	--
maker-scaffold10x_1194_pilon-snap-gene-0.33-mRNA-1	A0A4E0RNT2	A0A4E0RNT2|A0A4E0RNT2_FASHE_Nuclear_pore_complex_protein_Nup98-Nup96_OS=Fasciola_hepatica_OX=6192_GN=D915_006877_PE=4_SV=1	4.78	17.26	13.29	T0+T5+T10	0	0	0	ND.	1.09469	--	--	--	--	--
maker-scaffold10x_1194_pilon-snap-gene-0.35-mRNA-1	Q6R018	Q6R018|Q6R018_FASHE_Cathepsin_L_protein_OS=Fasciola_hepatica_OX=6192_PE=2_SV=1	0	0	0	ND.	900.96	223.67	916.26	T0+T5+T10	--	--	--	-2.54906	--	2.31894
maker-scaffold10x_1194_pilon-snap-gene-0.37-mRNA-1	A0A4E0RFP9	A0A4E0RFP9|A0A4E0RFP9_FASHE_Bloom_syndrome_protein_OS=Fasciola_hepatica_OX=6192_GN=D915_003541_PE=4_SV=1	9.61	15.95	17.86	T0+T5+T10	0	0	0	ND.	--	--	--	--	--	--
maker-scaffold10x_1194_pilon-snap-gene-0.38-mRNA-1	A0A4E0R959	A0A4E0R959|A0A4E0R959_FASHE_E3_ubiquitin-protein_ligase_MARCH5_OS=Fasciola_hepatica_OX=6192_GN=D915_006790_PE=4_SV=1	114	164.14	178.42	T0+T5+T10	0	0	0	ND.	--	--	--	--	--	--
maker-scaffold10x_1194_pilon-snap-gene-0.39-mRNA-1	A0A4V3SGM0	A0A4V3SGM0|A0A4V3SGM0_OPIFE_SprT-like_domain-containing_protein_OS=Opisthorchis_felineus_OX=147828_GN=CRM22_001820_PE=4_SV=1	0	0	0.17	T10	0	0	0	ND.	--	--	--	--	--	--
maker-scaffold10x_1194_pilon-snap-gene-0.40-mRNA-1	A0A4E0RM43	A0A4E0RM43|A0A4E0RM43_FASHE_GTP-binding_protein_2_OS=Fasciola_hepatica_OX=6192_GN=D915_000511_PE=4_SV=1	20.93	22.48	21.54	T0+T5+T10	0	0	0	ND.	--	-0.489596	--	--	--	--
maker-scaffold10x_1194_pilon-snap-gene-0.43-mRNA-1	A0A4E0RE88	A0A4E0RE88|A0A4E0RE88_FASHE_Receptor_protein_serine/threonine_kinase_OS=Fasciola_hepatica_OX=6192_GN=D915_009735_PE=3_SV=1	15.09	26.16	33.55	T0+T5+T10	0	0	0	ND.	--	0.561335	--	--	--	--
maker-scaffold10x_1194_pilon-snap-gene-0.44-mRNA-1	A0A4E0R6E2	A0A4E0R6E2|A0A4E0R6E2_FASHE_Synembryn-A_OS=Fasciola_hepatica_OX=6192_GN=D915_006876_PE=4_SV=1	51.66	112.04	175.99	T0+T5+T10	0	0	0	ND.	0.589961	0.782494	--	--	--	--
maker-scaffold10x_1194_pilon-snap-gene-0.45-mRNA-1	A0A2H1CIU7	A0A2H1CIU7|A0A2H1CIU7_FASHE_CI_protein_OS=Fasciola_hepatica_OX=6192_GN=D915_003540_PE=4_SV=1	0.04	0.1	0.02	T0+T5+T10	0	0	0	ND.	--	--	--	--	--	--
maker-scaffold10x_1194_pilon-snap-gene-0.46-mRNA-1	A0A4E0RUS5	A0A4E0RUS5|A0A4E0RUS5_FASHE_Putative_Zinc_finger_protein_OS=Fasciola_hepatica_OX=6192_GN=D915_004516_PE=4_SV=1	40.57	55.01	54.2	T0+T5+T10	0	0	0	ND.	--	--	--	--	--	--
maker-scaffold10x_1194_pilon-snap-gene-0.47-mRNA-1	A0A504YCH5	A0A504YCH5|A0A504YCH5_FASGI_Lipoyl_synthase,_mitochondrial_OS=Fasciola_gigantica_OX=46835_GN=FGIG_01526_PE=3_SV=1	0	0.75	0.32	T5+T10	0	0	0	ND.	--	--	--	--	--	--
maker-scaffold10x_1194_pilon-snap-gene-0.48-mRNA-1	A0A183A629	A0A183A629|A0A183A629_9TREM_SprT-like_domain-containing_protein_OS=Echinostoma_caproni_OX=27848_GN=ECPE_LOCUS2414_PE=4_SV=1	11.25	15.28	24.58	T0+T5+T10	0	0	0	ND.	--	--	--	--	--	--
maker-scaffold10x_1194_pilon-snap-gene-0.49-mRNA-1	A0A2H1CXH2	A0A2H1CXH2|A0A2H1CXH2_FASHE_Dorsal_switch_protein_1_OS=Fasciola_hepatica_OX=6192_GN=D915_000513_PE=4_SV=1	116.18	257.33	350.54	T0+T5+T10	0	0	0	ND.	0.744556	0.697212	--	--	--	--
maker-scaffold10x_1194_pilon-snap-gene-0.51-mRNA-1	A0A4E0RY37	A0A4E0RY37|A0A4E0RY37_FASHE_Vesicle_transport_protein_GOT1B_OS=Fasciola_hepatica_OX=6192_GN=D915_000516_PE=4_SV=1	51.5	74.22	78.84	T0+T5+T10	0	0	0	ND.	--	--	--	--	--	--
maker-scaffold10x_1194_pilon-snap-gene-0.52-mRNA-1	Q7JNQ9	Q7JNQ9|Q7JNQ9_FASHE_Secreted_cathepsin_L_1_OS=Fasciola_hepatica_OX=6192_GN=CL1_PE=2_SV=2	191.84	8.11	4.46	T0+T5+T10	242.53	35.07	68.64	T0+T5+T10	-4.75929	-5.91057	--	--	--	--
maker-scaffold10x_1198_pilon-augustus-gene-0.7-mRNA-1	A0A504YSW6	A0A504YSW6|A0A504YSW6_FASGI_YTH_domain-containing_protein_OS=Fasciola_gigantica_OX=46835_GN=FGIG_02953_PE=4_SV=1	191.86	166.28	90.44	T0+T5+T10	0	0	0	ND.	-0.61159	-1.68608	-1.01136	--	--	--
maker-scaffold10x_1198_pilon-snap-gene-0.53-mRNA-1	A0A2H1CJC9	A0A2H1CJC9|A0A2H1CJC9_FASHE_Ras_family_protein_OS=Fasciola_hepatica_OX=6192_GN=D915_05074_PE=4_SV=1	1.31	0.29	0.3	T0+T5+T10	0	0	0	ND.	-1.9815	-2.93613	--	--	--	--
maker-scaffold10x_1198_pilon-snap-gene-0.54-mRNA-1	A0A4E0QUJ3	A0A4E0QUJ3|A0A4E0QUJ3_FASHE_Dual_specificity_tyrosine-phosphorylation-regulated_kinase_2_(Fragment)_OS=Fasciola_hepatica_OX=6192_GN=D915_010713_PE=3_SV=1	0.06	1.51	9.74	T0+T5+T10	0	0	0	ND.	--	5.44695	2.57927	--	--	--
maker-scaffold10x_1198_pilon-snap-gene-0.55-mRNA-1	A0A2H1CUD0	A0A2H1CUD0|A0A2H1CUD0_FASHE_Palmitoyltransferase_OS=Fasciola_hepatica_OX=6192_GN=D915_000846_PE=3_SV=1	33.85	37.77	46.45	T0+T5+T10	0	0	0	ND.	--	--	--	--	--	--
maker-scaffold10x_1198_pilon-snap-gene-0.56-mRNA-1	A0A504YRM7	A0A504YRM7|A0A504YRM7_FASGI_Putative_Ankyrin_repeat-containing_OS=Fasciola_gigantica_OX=46835_GN=FGIG_02952_PE=4_SV=1	120.85	149.85	126.43	T0+T5+T10	0	23.49	0	T5	--	-0.533804	--	--	--	--
maker-scaffold10x_1198_pilon-snap-gene-0.57-mRNA-1	A0A4E0R9Q7	A0A4E0R9Q7|A0A4E0R9Q7_FASHE_GOLD_domain-containing_protein_OS=Fasciola_hepatica_OX=6192_GN=D915_005853_PE=3_SV=1	37.59	74.33	53.89	T0+T5+T10	0	0	0	ND.	--	--	--	--	--	--
maker-scaffold10x_1198_pilon-snap-gene-0.58-mRNA-1	A0A4E0S0V7	A0A4E0S0V7|A0A4E0S0V7_FASHE_Putative_ankyrin_repeat-containing_OS=Fasciola_hepatica_OX=6192_GN=D915_003103_PE=4_SV=1	0.41	0	0	T0	0	0	0	ND.	--	--	--	--	--	--
maker-scaffold10x_1198_pilon-snap-gene-0.59-mRNA-1	A0A4E0S3X2	A0A4E0S3X2|A0A4E0S3X2_FASHE_Glycogen_synthase_kinase-3_alpha_OS=Fasciola_hepatica_OX=6192_GN=D915_000845_PE=4_SV=1	23.19	36.28	46.79	T0+T5+T10	0	0	0	ND.	--	--	--	--	--	--
maker-scaffold10x_1198_pilon-snap-gene-0.60-mRNA-1	A0A504YDV8	A0A504YDV8|A0A504YDV8_FASGI_Sentrin-specific_protease_1_OS=Fasciola_gigantica_OX=46835_GN=FGIG_07247_PE=4_SV=1	33.62	46.37	70.6	T0+T5+T10	0	0	0	ND.	--	--	--	--	--	--
maker-scaffold10x_120_pilon-augustus-gene-0.94-mRNA-1	A0A4E0R8D7	A0A4E0R8D7|A0A4E0R8D7_FASHE_Protein_sister_of_odd_and_bowel_OS=Fasciola_hepatica_OX=6192_GN=D915_005243_PE=4_SV=1	0.19	0	0	T0	0	0	0	ND.	--	--	--	--	--	--
maker-scaffold10x_120_pilon-augustus-gene-0.96-mRNA-1	A0A504YHD0	A0A504YHD0|A0A504YHD0_FASGI_Glutamyl-tRNA(Gln)_amidotransferase_subunit_C_mitochondrial_OS=Fasciola_gigantica_OX=46835_GN=FGIG_01270_PE=4_SV=1	65.79	121.31	220.79	T0+T5+T10	0	0	0	ND.	0.534987	0.926971	--	--	--	--
maker-scaffold10x_120_pilon-augustus-gene-0.97-mRNA-1	A0A504YHG2	A0A504YHG2|A0A504YHG2_FASGI_Integrin_beta_OS=Fasciola_gigantica_OX=46835_GN=FGIG_01269_PE=3_SV=1	23.61	33.84	67.61	T0+T5+T10	0	0	0	ND.	--	0.627843	0.835571	--	--	--
maker-scaffold10x_120_pilon-snap-gene-0.16-mRNA-1	A0A4E0RF63	A0A4E0RF63|A0A4E0RF63_FASHE_MAP/microtubule_affinity-regulating_kinase_3_OS=Fasciola_hepatica_OX=6192_GN=D915_004344_PE=4_SV=1	51.94	60.97	71.45	T0+T5+T10	0	0	0	ND.	--	--	--	--	--	--
maker-scaffold10x_120_pilon-snap-gene-0.17-mRNA-1	no hit	no hit	144.55	176.4	102.71	T0+T5+T10	0	0	0	ND.	--	-1.13049	-0.851097	--	--	--
maker-scaffold10x_120_pilon-snap-gene-0.18-mRNA-1	A0A4E0RDL8	A0A4E0RDL8|A0A4E0RDL8_FASHE_TMEM101_protein_family_OS=Fasciola_hepatica_OX=6192_GN=D915_009815_PE=4_SV=1	53.11	103.01	129.67	T0+T5+T10	0	0	0	ND.	0.471712	0.607433	--	--	--	--
maker-scaffold10x_120_pilon-snap-gene-0.19-mRNA-1	A0A504YEQ2	A0A504YEQ2|A0A504YEQ2_FASGI_BTB/POZ_domain-containing_protein_KCTD3_OS=Fasciola_gigantica_OX=46835_GN=FGIG_03896_PE=4_SV=1	99.22	147.1	141.39	T0+T5+T10	0	0	0	ND.	--	--	--	--	--	--
maker-scaffold10x_120_pilon-snap-gene-0.21-mRNA-1	A0A075A0F3	A0A075A0F3|A0A075A0F3_9TREM_SOCS_box_domain-containing_protein_OS=Opisthorchis_viverrini_OX=6198_GN=T265_02086_PE=4_SV=1	50.21	26.22	24.58	T0+T5+T10	0	0	0	ND.	-1.35051	-1.57284	--	--	--	--
maker-scaffold10x_120_pilon-snap-gene-0.22-mRNA-1	A0A2H1CF15	A0A2H1CF15|A0A2H1CF15_FASHE_Malate_dehydrogenase_OS=Fasciola_hepatica_OX=6192_GN=D915_004345_PE=3_SV=1	33.04	35.61	41.93	T0+T5+T10	1134.62	1285.74	870.56	T0+T5+T10	--	--	--	--	--	--
maker-scaffold10x_120_pilon-snap-gene-0.23-mRNA-1	A0A4E0RXF0	A0A4E0RXF0|A0A4E0RXF0_FASHE_Endoplasmic_reticulum-Golgi_intermediate_compartment_protein_2_OS=Fasciola_hepatica_OX=6192_GN=D915_008672_PE=4_SV=1	12.32	15.77	21.79	T0+T5+T10	0	0	0	ND.	--	--	--	--	--	--
maker-scaffold10x_120_pilon-snap-gene-0.25-mRNA-1	A0A504Y7U5	A0A504Y7U5|A0A504Y7U5_FASGI_Rhodanese_domain-containing_protein_OS=Fasciola_gigantica_OX=46835_GN=FGIG_03898_PE=4_SV=1	127.11	72.86	49.58	T0+T5+T10	0	0	0	ND.	-1.14955	-1.97041	-0.757414	--	--	--
maker-scaffold10x_120_pilon-snap-gene-0.28-mRNA-1	A0A4E0RC33	A0A4E0RC33|A0A4E0RC33_FASHE_PPPDE_peptidase_domain-containing_protein_1_OS=Fasciola_hepatica_OX=6192_GN=D915_005244_PE=4_SV=1	106.23	104.17	76.41	T0+T5+T10	0	0	0	ND.	--	-1.18651	-0.659336	--	--	--
maker-scaffold10x_1201_pilon-snap-gene-0.0-mRNA-1	A0A4E0R0Y1	A0A4E0R0Y1|A0A4E0R0Y1_FASHE_Zinc_finger_MYM-type_protein_3_OS=Fasciola_hepatica_OX=6192_GN=D915_009707_PE=4_SV=1	13.1	35.85	34.13	T0+T5+T10	0	0	0	ND.	1.0688	0.911749	--	--	--	--
maker-scaffold10x_1201_pilon-snap-gene-0.1-mRNA-1	A0A4E0RWK5	A0A4E0RWK5|A0A4E0RWK5_FASHE_Cadmium_metallothionein_(MT-Cd)_(Cd-MT)_OS=Fasciola_hepatica_OX=6192_GN=D915_009743_PE=4_SV=1	0.63	1.34	5.71	T0+T5+T10	0	0	0	ND.	--	--	--	--	--	--
maker-scaffold10x_1203_pilon-snap-gene-0.9-mRNA-1	A0A4E0S1L1	A0A4E0S1L1|A0A4E0S1L1_FASHE_Solute_carrier_family_2_facilitated_glucose_transporter_member_3_OS=Fasciola_hepatica_OX=6192_GN=D915_004351_PE=3_SV=1	9.46	11.44	8.35	T0+T5+T10	92.48	142.98	0	T0+T5	--	-0.899814	--	--	--	--
maker-scaffold10x_1211_pilon-augustus-gene-0.52-mRNA-1	no hit	no hit	0.32	0	0	T0	0	0	0	ND.	--	--	--	--	--	--
maker-scaffold10x_1211_pilon-augustus-gene-0.53-mRNA-1	A0A4E0RLC9	A0A4E0RLC9|A0A4E0RLC9_FASHE_Multidrug_resistance_protein_1_OS=Fasciola_hepatica_OX=6192_GN=D915_007290_PE=4_SV=1	954.75	739.53	444.61	T0+T5+T10	0	0	0	ND.	-0.794327	-1.73146	-0.872986	--	--	--
maker-scaffold10x_1211_pilon-snap-gene-0.0-mRNA-1	A0A4E0RR10	A0A4E0RR10|A0A4E0RR10_FASHE_RBR-type_E3_ubiquitin_transferase_OS=Fasciola_hepatica_OX=6192_GN=D915_005532_PE=3_SV=1	15.1	31.83	40.62	T0+T5+T10	0	0	0	ND.	0.619011	0.60064	--	--	--	--
maker-scaffold10x_1211_pilon-snap-gene-0.1-mRNA-1	A0A4E0RRS9	A0A4E0RRS9|A0A4E0RRS9_FASHE_Regulator_of_nonsense_transcripts_1_OS=Fasciola_hepatica_OX=6192_GN=D915_005843_PE=4_SV=1	40.32	53.66	96.97	T0+T5+T10	0	0	0	ND.	--	--	--	--	--	--
maker-scaffold10x_1211_pilon-snap-gene-0.5-mRNA-1	A0A4E0R4Q5	A0A4E0R4Q5|A0A4E0R4Q5_FASHE_Microsomal_triglyceride_transfer_protein_large_subunit_OS=Fasciola_hepatica_OX=6192_GN=D915_005533_PE=4_SV=1	0	0.21	3.98	T5+T10	0	0	0	ND.	--	6.23783	3.83951	--	--	--
maker-scaffold10x_1211_pilon-snap-gene-0.6-mRNA-1	A0A4E0S0B9	A0A4E0S0B9|A0A4E0S0B9_FASHE_Translocon-associated_protein_subunit_delta_OS=Fasciola_hepatica_OX=6192_GN=D915_005534_PE=4_SV=1	596	694.63	630.98	T0+T5+T10	771.83	707.37	1047.39	T0+T5+T10	--	-0.488911	--	--	--	0.92021
maker-scaffold10x_1211_pilon-snap-gene-0.7-mRNA-1	A0A4E0RRS9	A0A4E0RRS9|A0A4E0RRS9_FASHE_Regulator_of_nonsense_transcripts_1_OS=Fasciola_hepatica_OX=6192_GN=D915_005843_PE=4_SV=1	1.85	1.73	0.46	T0+T5+T10	0	0	0	ND.	--	-2.32285	--	--	--	--
maker-scaffold10x_1213_pilon-augustus-gene-0.11-mRNA-1	A0A2H1C415	A0A2H1C415|A0A2H1C415_FASHE_CUB_domain-containing_protein_OS=Fasciola_hepatica_OX=6192_GN=D915_10867_PE=4_SV=1	0.44	0	0	T0	0	0	0	ND.	--	--	--	--	--	--
maker-scaffold10x_1213_pilon-snap-gene-0.60-mRNA-1	A0A4E0RWE8	A0A4E0RWE8|A0A4E0RWE8_FASHE_Putative_cellular_retinaldehyde-binding_protein_OS=Fasciola_hepatica_OX=6192_GN=D915_002001_PE=4_SV=1	24.91	41.53	58.2	T0+T5+T10	0	0	0	ND.	--	0.465276	--	--	--	--
maker-scaffold10x_1213_pilon-snap-gene-0.61-mRNA-1	A0A4E0S3A7	A0A4E0S3A7|A0A4E0S3A7_FASHE_Death_domain-containing_protein_OS=Fasciola_hepatica_OX=6192_GN=D915_002003_PE=4_SV=1	0.14	0	0	T0	0	0	0	ND.	--	--	--	--	--	--
maker-scaffold10x_1213_pilon-snap-gene-0.62-mRNA-1	A0A4E0RG40	A0A4E0RG40|A0A4E0RG40_FASHE_Mitochondrial_ribosomal_protein_L16_OS=Fasciola_hepatica_OX=6192_GN=D915_003653_PE=3_SV=1	107.84	142.14	161.74	T0+T5+T10	0	0	0	ND.	--	--	--	--	--	--
maker-scaffold10x_1213_pilon-snap-gene-0.63-mRNA-1	A0A4E0RVI3	A0A4E0RVI3|A0A4E0RVI3_FASHE_Translocon-associated_protein_subunit_beta_OS=Fasciola_hepatica_OX=6192_GN=D915_010748_PE=4_SV=1	191.43	250.97	244.87	T0+T5+T10	873.59	589.16	1260.43	T0+T5+T10	--	-0.394875	--	--	--	1.47248
maker-scaffold10x_1213_pilon-snap-gene-0.65-mRNA-1	no hit	no hit	0	0.33	0.31	T5+T10	0	0	0	ND.	--	--	--	--	--	--
maker-scaffold10x_1213_pilon-snap-gene-0.69-mRNA-1	A0A4E0S271	A0A4E0S271|A0A4E0S271_FASHE_Cyclin-dependent_kinase_14_OS=Fasciola_hepatica_OX=6192_GN=D915_003652_PE=4_SV=1	0.46	1.23	0.95	T0+T5+T10	0	0	0	ND.	--	--	--	--	--	--
maker-scaffold10x_122_pilon-augustus-gene-0.33-mRNA-1	A0A504Z0D2	A0A504Z0D2|A0A504Z0D2_FASGI_Pleckstrin_domain-containing_family_B_member_2_OS=Fasciola_gigantica_OX=46835_GN=FGIG_07877_PE=4_SV=1	1004.23	845.71	658.3	T0+T5+T10	57.57	130.35	0	T0+T5	-0.599805	-1.15643	--	--	--	-1.17614
maker-scaffold10x_122_pilon-augustus-gene-0.34-mRNA-1	A0A4E0RXM5	A0A4E0RXM5|A0A4E0RXM5_FASHE_BTB/POZ_domain-containing_protein_6-A_OS=Fasciola_hepatica_OX=6192_GN=D915_006246_PE=4_SV=1	0	0.26	0.41	T5+T10	0	0	0	ND.	--	--	--	--	--	--
maker-scaffold10x_122_pilon-augustus-gene-0.36-mRNA-1	A0A4E0S2F4	A0A4E0S2F4|A0A4E0S2F4_FASHE_Nuclear_receptor_2DBD_gamma_OS=Fasciola_hepatica_OX=6192_GN=D915_003338_PE=3_SV=1	10.7	16.73	16.09	T0+T5+T10	0	0	0	ND.	--	--	--	--	--	--
maker-scaffold10x_122_pilon-pred_gff_StringTie-gene-0.3-mRNA-1	no hit	no hit	145.13	141.15	60.94	T0+T5+T10	0	0	0	ND.	-0.469522	-1.66135	-1.13109	--	--	--
maker-scaffold10x_1220_pilon-augustus-gene-0.9-mRNA-1	A0A4E0R193	A0A4E0R193|A0A4E0R193_FASHE_Putative_dna_repair_protein_xp-E_OS=Fasciola_hepatica_OX=6192_GN=D915_007647_PE=4_SV=1	7.22	12.41	18.04	T0+T5+T10	0	8.74	0	T5	--	0.538607	--	--	--	--
maker-scaffold10x_1222_pilon-augustus-gene-0.0-mRNA-1	A0A4E0S2I8	A0A4E0S2I8|A0A4E0S2I8_FASHE_Venom_allergen_(VAL)_27_protein_OS=Fasciola_hepatica_OX=6192_GN=D915_001525_PE=3_SV=1	0.49	0	0.43	T0+T10	0	0	0	ND.	--	--	--	--	--	--
maker-scaffold10x_123_pilon-pred_gff_StringTie-gene-0.74-mRNA-1	A0A2H1CHC2	A0A2H1CHC2|A0A2H1CHC2_FASHE_F5/8_type_C_domain-containing_protein_OS=Fasciola_hepatica_OX=6192_GN=D915_16264_PE=4_SV=1	17.29	16.76	21.49	T0+T5+T10	0	0	0	ND.	--	--	--	--	--	--
maker-scaffold10x_123_pilon-snap-gene-0.58-mRNA-1	A0A4E0R9D5	A0A4E0R9D5|A0A4E0R9D5_FASHE_Long-chain-fatty-acid--CoA_ligase_5_OS=Fasciola_hepatica_OX=6192_GN=D915_006712_PE=4_SV=1	23.88	34.91	47.65	T0+T5+T10	0	4.79	0	T5	--	--	--	--	--	--
maker-scaffold10x_123_pilon-snap-gene-0.59-mRNA-1	no hit	no hit	0	0	0.72	T10	0	0	0	ND.	--	--	--	--	--	--
maker-scaffold10x_123_pilon-snap-gene-0.60-mRNA-1	A0A4E0QZM8	A0A4E0QZM8|A0A4E0QZM8_FASHE_Small_glutamine-rich_tetratricopeptide_repeat-containing_protein_alpha_OS=Fasciola_hepatica_OX=6192_GN=D915_009093_PE=4_SV=1	133.24	182.28	297.81	T0+T5+T10	39.39	92.67	0	T0+T5	--	0.513445	--	--	--	--
maker-scaffold10x_123_pilon-snap-gene-0.61-mRNA-1	A0A4E0R7N6	A0A4E0R7N6|A0A4E0R7N6_FASHE_RAD50-interacting_protein_1_OS=Fasciola_hepatica_OX=6192_GN=D915_006550_PE=4_SV=1	7.11	6.8	10.38	T0+T5+T10	0	0	0	ND.	--	--	--	--	--	--
maker-scaffold10x_123_pilon-snap-gene-0.62-mRNA-1	A0A4E0R8P2	A0A4E0R8P2|A0A4E0R8P2_FASHE_SH3_and_multiple_ankyrin_repeat_domains_protein_OS=Fasciola_hepatica_OX=6192_GN=D915_007144_PE=4_SV=1	6.5	9.27	5.22	T0+T5+T10	0	0	0	ND.	--	--	-0.996029	--	--	--
maker-scaffold10x_123_pilon-snap-gene-0.63-mRNA-1	A0A4E0RLY8	A0A4E0RLY8|A0A4E0RLY8_FASHE_Protein_patched_1_OS=Fasciola_hepatica_OX=6192_GN=D915_000619_PE=4_SV=1	0.14	0.92	2.63	T0+T5+T10	0	0	0	ND.	--	2.79718	--	--	--	--
maker-scaffold10x_123_pilon-snap-gene-0.64-mRNA-1	A0A4E0RE24	A0A4E0RE24|A0A4E0RE24_FASHE_Dynactin_subunit_2-B_OS=Fasciola_hepatica_OX=6192_GN=D915_009131_PE=4_SV=1	0	0.75	0	T5	0	0	0	ND.	--	--	--	--	--	--
maker-scaffold10x_123_pilon-snap-gene-0.67-mRNA-1	A0A504Z2R7	A0A504Z2R7|A0A504Z2R7_FASGI_Poly_[ADP-ribose]_polymerase_OS=Fasciola_gigantica_OX=46835_GN=FGIG_06767_PE=4_SV=1	4.01	4.59	4.6	T0+T5+T10	0	0	0	ND.	--	--	--	--	--	--
maker-scaffold10x_123_pilon-snap-gene-0.68-mRNA-1	A0A419PK05	A0A419PK05|A0A419PK05_CLOSI_Coiled-coil_domain-containing_protein_OS=Clonorchis_sinensis_OX=79923_GN=CCDC102B_PE=4_SV=1	7.79	6.41	5.69	T0+T5+T10	0	0	0	ND.	--	-0.854127	--	--	--	--
maker-scaffold10x_123_pilon-snap-gene-0.69-mRNA-1	no hit	no hit	1.57	3.28	2.88	T0+T5+T10	0	0	0	ND.	--	--	--	--	--	--
maker-scaffold10x_123_pilon-snap-gene-0.70-mRNA-1	A0A4E0QZ85	A0A4E0QZ85|A0A4E0QZ85_FASHE_S-(hydroxymethyl)glutathione_dehydrogenase_OS=Fasciola_hepatica_OX=6192_GN=D915_009060_PE=3_SV=1	93.38	93.34	84.35	T0+T5+T10	35.33	173.17	68.87	T0+T5+T10	--	-0.723333	--	--	--	--
maker-scaffold10x_123_pilon-snap-gene-0.72-mRNA-1	A0A504Z2W8	A0A504Z2W8|A0A504Z2W8_FASGI_Exocyst_complex_component_3_(Fragment)_OS=Fasciola_gigantica_OX=46835_GN=FGIG_02595_PE=4_SV=1	2.08	3.12	3.92	T0+T5+T10	0	0	0	ND.	--	--	--	--	--	--
maker-scaffold10x_123_pilon-snap-gene-0.73-mRNA-1	A0A4E0RMI3	A0A4E0RMI3|A0A4E0RMI3_FASHE_Phosphoserine_aminotransferase_OS=Fasciola_hepatica_OX=6192_GN=D915_006323_PE=3_SV=1	17.58	39.6	70.27	T0+T5+T10	0	0	0	ND.	0.85791	1.38364	--	--	--	--
maker-scaffold10x_1231_pilon-augustus-gene-0.41-mRNA-1	A0A4E0RZH8	A0A4E0RZH8|A0A4E0RZH8_FASHE_Metalloproteinase_inhibitor_1_OS=Fasciola_hepatica_OX=6192_GN=D915_004416_PE=4_SV=1	0	0	0.36	T10	0	0	0	ND.	--	--	--	--	--	--
maker-scaffold10x_1231_pilon-snap-gene-0.0-mRNA-1	A0A504XLE8	A0A504XLE8|A0A504XLE8_FASGI_Eukaryotic_translation_initiation_factor_3_subunit_A_OS=Fasciola_gigantica_OX=46835_GN=FGIG_05987_PE=3_SV=1	48.73	71.19	96.22	T0+T5+T10	11.26	82.37	22.39	T0+T5+T10	--	--	--	--	--	--
maker-scaffold10x_1231_pilon-snap-gene-0.1-mRNA-1	A0A4E0RGA4	A0A4E0RGA4|A0A4E0RGA4_FASHE_Villin-2_OS=Fasciola_hepatica_OX=6192_GN=D915_001323_PE=4_SV=1	80.8	82.62	56.13	T0+T5+T10	0	0	0	ND.	--	-1.252	-0.784788	--	--	--
maker-scaffold10x_1231_pilon-snap-gene-0.3-mRNA-1	A0A504YDQ7	A0A504YDQ7|A0A504YDQ7_FASGI_Helicase_ARIP4_OS=Fasciola_gigantica_OX=46835_GN=FGIG_05655_PE=4_SV=1	9.81	10.03	5.05	T0+T5+T10	0	0	0	ND.	--	-1.51844	--	--	--	--
maker-scaffold10x_1231_pilon-snap-gene-0.6-mRNA-1	A0A504YDQ7	A0A504YDQ7|A0A504YDQ7_FASGI_Helicase_ARIP4_OS=Fasciola_gigantica_OX=46835_GN=FGIG_05655_PE=4_SV=1	189.43	178.33	163.92	T0+T5+T10	0	0	0	ND.	-0.488032	-0.899419	--	--	--	--
maker-scaffold10x_1236_pilon-snap-gene-0.12-mRNA-1	A0A2H1CFL4	A0A2H1CFL4|A0A2H1CFL4_FASHE_Oxidoreductase,_short_chain_dehydrogenase/reductase_family_protein_OS=Fasciola_hepatica_OX=6192_GN=D915_06486_PE=4_SV=1	7.63	9.64	18.63	T0+T5+T10	0	0	0	ND.	--	0.674791	--	--	--	--
maker-scaffold10x_1236_pilon-snap-gene-0.14-mRNA-1	no hit	no hit	0.64	0	0	T0	0	0	0	ND.	--	-5.87837	--	--	--	--
maker-scaffold10x_1237_pilon-augustus-gene-0.34-mRNA-1	A0A504YEL3	A0A504YEL3|A0A504YEL3_FASGI_DNA_polymerase_delta_small_subunit_OS=Fasciola_gigantica_OX=46835_GN=FGIG_03597_PE=4_SV=1	14.88	22.24	39.1	T0+T5+T10	0	0	0	ND.	--	--	--	--	--	--
maker-scaffold10x_1237_pilon-augustus-gene-0.35-mRNA-1	A0A504YV89	A0A504YV89|A0A504YV89_FASGI_Serine_palmitoyl_transferase_LCB2_subunit_OS=Fasciola_gigantica_OX=46835_GN=FGIG_02926_PE=3_SV=1	173.14	155.07	114.72	T0+T5+T10	0	0	0	ND.	-0.589495	-1.26161	-0.608094	--	--	--
maker-scaffold10x_1237_pilon-snap-gene-0.3-mRNA-1	A0A4E0RI64	A0A4E0RI64|A0A4E0RI64_FASHE_26S_proteasome_non-ATPase_regulatory_subunit_1_OS=Fasciola_hepatica_OX=6192_GN=D915_002675_PE=3_SV=1	33.96	51.14	58.55	T0+T5+T10	17.99	45.59	10.8	T0+T5+T10	--	--	--	--	--	--
maker-scaffold10x_1237_pilon-snap-gene-0.6-mRNA-1	A0A504YD28	A0A504YD28|A0A504YD28_FASGI_Serine/threonine-protein_kinase_mig-15_OS=Fasciola_gigantica_OX=46835_GN=FGIG_03596_PE=4_SV=1	10.91	13.39	10.43	T0+T5+T10	0	0	0	ND.	--	-0.675183	--	--	--	--
maker-scaffold10x_1237_pilon-snap-gene-0.7-mRNA-1	A0A4E0S017	A0A4E0S017|A0A4E0S017_FASHE_Phospholipid-transporting_ATPase_OS=Fasciola_hepatica_OX=6192_GN=D915_006247_PE=3_SV=1	0.89	0.77	0.57	T0+T5+T10	0	0	0	ND.	--	--	--	--	--	--
maker-scaffold10x_1238_pilon-augustus-gene-0.0-mRNA-1	A0A4E0QV89	A0A4E0QV89|A0A4E0QV89_FASHE_PHF8_OS=Fasciola_hepatica_OX=6192_GN=D915_009942_PE=4_SV=1	0.1	0	0.84	T0+T10	0	0	0	ND.	--	--	6.0574	--	--	--
maker-scaffold10x_1238_pilon-snap-gene-0.15-mRNA-1	A0A4E0RI36	A0A4E0RI36|A0A4E0RI36_FASHE_Homeobox_protein_SIX3_OS=Fasciola_hepatica_OX=6192_GN=D915_002245_PE=4_SV=1	0	0.22	1.84	T5+T10	0	0	0	ND.	--	6.9303	--	--	--	--
maker-scaffold10x_1239_pilon-pred_gff_StringTie-gene-0.4-mRNA-1	no hit	no hit	2.17	0.64	2.06	T0+T5+T10	0	0	0	ND.	-2.46265	--	--	--	--	--
maker-scaffold10x_1239_pilon-snap-gene-0.14-mRNA-1	A0A4E0RLB7	A0A4E0RLB7|A0A4E0RLB7_FASHE_Transcriptional_activator_OS=Fasciola_hepatica_OX=6192_GN=D915_007077_PE=4_SV=1	5.31	9.63	9.93	T0+T5+T10	0	0	0	ND.	--	--	--	--	--	--
maker-scaffold10x_1239_pilon-snap-gene-0.17-mRNA-1	A0A4E0RMY1	A0A4E0RMY1|A0A4E0RMY1_FASHE_Replication_protein_A_subunit_OS=Fasciola_hepatica_OX=6192_GN=D915_007076_PE=4_SV=1	148.79	435.91	780.62	T0+T5+T10	0	0	0	ND.	1.31128	1.59449	--	--	--	--
maker-scaffold10x_124_pilon-snap-gene-0.15-mRNA-1	A0A2H1CIZ5	A0A2H1CIZ5|A0A2H1CIZ5_FASHE_Ribosomal_protein_L24_OS=Fasciola_hepatica_OX=6192_GN=D915_003546_PE=3_SV=1	2554.67	3250.19	4672.6	T0+T5+T10	0	0	0	ND.	--	--	--	--	--	--
maker-scaffold10x_124_pilon-snap-gene-0.17-mRNA-1	A0A504YKE6	A0A504YKE6|A0A504YKE6_FASGI_CDT1_domain-containing_protein_(Fragment)_OS=Fasciola_gigantica_OX=46835_GN=FGIG_11340_PE=4_SV=1	5.32	15.23	19.03	T0+T5+T10	0	0	0	ND.	1.06243	1.08716	--	--	--	--
maker-scaffold10x_1243_pilon-snap-gene-0.2-mRNA-1	no hit	no hit	5.73	10.6	17.85	T0+T5+T10	0	0	0	ND.	--	0.850804	--	--	--	--
maker-scaffold10x_1243_pilon-snap-gene-0.3-mRNA-1	A0A4E0QZ66	A0A4E0QZ66|A0A4E0QZ66_FASHE_Ribosomal_protein_OS=Fasciola_hepatica_OX=6192_GN=D915_009545_PE=3_SV=1	730.1	559.3	805.9	T0+T5+T10	1724.58	2227.91	1610.5	T0+T5+T10	-0.683951	-0.539953	--	--	--	--
maker-scaffold10x_1247_pilon-snap-gene-0.3-mRNA-1	A0A504YYE9	A0A504YYE9|A0A504YYE9_FASGI_Protein_CLEC16A_(Fragment)_OS=Fasciola_gigantica_OX=46835_GN=FGIG_08436_PE=4_SV=1	9.72	16.17	32.25	T0+T5+T10	0	0	0	ND.	--	0.888606	--	--	--	--
maker-scaffold10x_125_pilon-augustus-gene-0.72-mRNA-1	no hit	no hit	6.66	6.17	7.31	T0+T5+T10	0	0	0	ND.	--	--	--	--	--	--
maker-scaffold10x_125_pilon-augustus-gene-0.74-mRNA-1	A0A4E0RDT2	A0A4E0RDT2|A0A4E0RDT2_FASHE_Lig_chan-Glu_bd_domain-containing_protein_OS=Fasciola_hepatica_OX=6192_GN=D915_004582_PE=4_SV=1	0	0.29	1.22	T5+T10	0	0	0	ND.	--	--	--	--	--	--
maker-scaffold10x_125_pilon-augustus-gene-0.75-mRNA-1	A0A3R7FQ41	A0A3R7FQ41|A0A3R7FQ41_CLOSI_CCR4-NOT_transcription_complex_subunit_1_(Fragment)_OS=Clonorchis_sinensis_OX=79923_GN=cnot1_PE=4_SV=1	0	0.13	0.1	T5+T10	0	0	0	ND.	--	--	--	--	--	--
maker-scaffold10x_125_pilon-augustus-gene-0.76-mRNA-1	A0A4E0RRE9	A0A4E0RRE9|A0A4E0RRE9_FASHE_Synaptic_glycoprotein_SC2_OS=Fasciola_hepatica_OX=6192_GN=D915_005715_PE=4_SV=1	217.06	207.9	227.94	T0+T5+T10	0	115.31	0	T5	-0.539376	-0.582527	--	--	--	--
maker-scaffold10x_125_pilon-augustus-gene-0.77-mRNA-1	A0A4E0RA77	A0A4E0RA77|A0A4E0RA77_FASHE_Enolase_C_domain-containing_protein_OS=Fasciola_hepatica_OX=6192_GN=D915_005089_PE=4_SV=1	0.14	0	0	T0	0	0	0	ND.	--	--	--	--	--	--
maker-scaffold10x_125_pilon-augustus-gene-0.80-mRNA-1	A0A183ANM7	A0A183ANM7|A0A183ANM7_9TREM_N2227_domain-containing_protein_OS=Echinostoma_caproni_OX=27848_GN=ECPE_LOCUS8562_PE=4_SV=1	6.82	10.17	11.39	T0+T5+T10	0	0	0	ND.	--	--	--	--	--	--
maker-scaffold10x_125_pilon-snap-gene-0.19-mRNA-1	A0A4E0RC28	A0A4E0RC28|A0A4E0RC28_FASHE_CCR4-NOT_transcription_complex_subunit_1_OS=Fasciola_hepatica_OX=6192_GN=D915_002981_PE=4_SV=1	5.19	12.42	10.11	T0+T5+T10	0	0	0	ND.	0.928052	0.584288	--	--	--	--
maker-scaffold10x_125_pilon-snap-gene-0.20-mRNA-1	A0A3R7CFX9	A0A3R7CFX9|A0A3R7CFX9_CLOSI_Neuronal_acetylcholine_receptor_subunit_alpha-7_OS=Clonorchis_sinensis_OX=79923_GN=CHRNA7_PE=4_SV=1	0.23	0.05	0.43	T0+T5+T10	0	0	0	ND.	--	--	--	--	--	--
maker-scaffold10x_125_pilon-snap-gene-0.21-mRNA-1	A0A4E0R5B2	A0A4E0R5B2|A0A4E0R5B2_FASHE_Fork-head_domain-containing_protein_OS=Fasciola_hepatica_OX=6192_GN=D915_005599_PE=4_SV=1	7.37	4.9	2.29	T0+T5+T10	0	0	0	ND.	-1.33889	-2.29359	--	--	--	--
maker-scaffold10x_125_pilon-snap-gene-0.22-mRNA-1	H2KP49	H2KP49|H2KP49_CLOSI_Dual_specificity_protein_phosphatase_15_OS=Clonorchis_sinensis_OX=79923_GN=CLF_101340_PE=4_SV=1	175.34	159.49	136.82	T0+T5+T10	0	0	0	ND.	-0.524907	-0.936892	--	--	--	--
maker-scaffold10x_125_pilon-snap-gene-0.23-mRNA-1	A0A504YC83	A0A504YC83|A0A504YC83_FASGI_Ubiquitin_carboxyl-terminal_hydrolase_OS=Fasciola_gigantica_OX=46835_GN=FGIG_06318_PE=3_SV=1	0.17	1.15	1.75	T0+T5+T10	52.7	132.92	21.43	T0+T5+T10	--	--	--	--	--	--
maker-scaffold10x_125_pilon-snap-gene-0.29-mRNA-1	A0A2H1CCN0	A0A2H1CCN0|A0A2H1CCN0_FASHE_UBA/TS-N_domain_protein_(Fragment)_OS=Fasciola_hepatica_OX=6192_GN=D915_08310_PE=4_SV=1	24.5	54.58	34.5	T0+T5+T10	0	0	0	ND.	--	--	--	--	--	--
maker-scaffold10x_125_pilon-snap-gene-0.30-mRNA-1	A0A4E0RBT6	A0A4E0RBT6|A0A4E0RBT6_FASHE_B41_domain-containing_protein_OS=Fasciola_hepatica_OX=6192_GN=D915_004583_PE=4_SV=1	0.03	0.03	0	T0+T5	0	0	0	ND.	--	--	--	--	--	--
maker-scaffold10x_1256_pilon-snap-gene-0.1-mRNA-1	A0A2H1BVH6	A0A2H1BVH6|A0A2H1BVH6_FASHE_SET_domain_protein_OS=Fasciola_hepatica_OX=6192_GN=D915_009450_PE=4_SV=1	15.71	22.46	30.07	T0+T5+T10	0	0	0	ND.	--	--	--	--	--	--
maker-scaffold10x_1257_pilon-augustus-gene-0.9-mRNA-1	A0A5J4NEQ9	A0A5J4NEQ9|A0A5J4NEQ9_9TREM_Heat_shock_protein_110kDa_OS=Paragonimus_westermani_OX=34504_GN=DEA37_0006394_PE=4_SV=1	0.16	0.07	0.44	T0+T5+T10	0	0	0	ND.	--	--	--	--	--	--
maker-scaffold10x_1257_pilon-snap-gene-0.61-mRNA-1	A0A4E0R9R1	A0A4E0R9R1|A0A4E0R9R1_FASHE_SH3_domain-containing_protein_OS=Fasciola_hepatica_OX=6192_GN=D915_006527_PE=4_SV=1	122.6	106.58	49.14	T0+T5+T10	0	0	0	ND.	-0.772654	-1.74838	-0.914732	--	--	--
maker-scaffold10x_1257_pilon-snap-gene-0.63-mRNA-1	A0A504YYE4	A0A504YYE4|A0A504YYE4_FASGI_39S_ribosomal_protein_L22_mitochondrial_OS=Fasciola_gigantica_OX=46835_GN=FGIG_10646_PE=4_SV=1	42.77	127.21	156.44	T0+T5+T10	0	0	0	ND.	1.30814	0.959772	--	--	--	--
maker-scaffold10x_1257_pilon-snap-gene-0.66-mRNA-1	A0A4E0RED9	A0A4E0RED9|A0A4E0RED9_FASHE_Cytosolic_non-specific_dipeptidase_OS=Fasciola_hepatica_OX=6192_GN=D915_002855_PE=4_SV=1	1.8	10.44	23.25	T0+T5+T10	201.76	40.44	144.49	T0+T5+T10	2.15701	2.64959	--	--	--	2.228
maker-scaffold10x_1257_pilon-snap-gene-0.67-mRNA-1	no hit	no hit	8.89	20.5	23.29	T0+T5+T10	0	0	0	ND.	--	--	--	--	--	--
maker-scaffold10x_1257_pilon-snap-gene-0.68-mRNA-1	A0A4S2MCB0	A0A4S2MCB0|A0A4S2MCB0_OPIFE_Succinate_dehydrogenase_assembly_factor_2,_mitochondrial_OS=Opisthorchis_felineus_OX=147828_GN=CRM22_001101_PE=3_SV=1	41.37	61.66	71.69	T0+T5+T10	0	0	0	ND.	--	--	--	--	--	--
maker-scaffold10x_1257_pilon-snap-gene-0.69-mRNA-1	A0A4E0R5R4	A0A4E0R5R4|A0A4E0R5R4_FASHE_Cleavage_stimulation_factor_subunit_OS=Fasciola_hepatica_OX=6192_GN=D915_008283_PE=4_SV=1	0.14	0.12	0.23	T0+T5+T10	0	0	0	ND.	--	--	--	--	--	--
maker-scaffold10x_1257_pilon-snap-gene-0.70-mRNA-1	A0A4E0S1L3	A0A4E0S1L3|A0A4E0S1L3_FASHE_tRNA(His)_guanylyltransferase_OS=Fasciola_hepatica_OX=6192_GN=D915_004366_PE=3_SV=1	15.7	11.9	8.88	T0+T5+T10	0	0	0	ND.	-0.971707	-1.27054	--	--	--	--
maker-scaffold10x_1257_pilon-snap-gene-0.71-mRNA-1	no hit	no hit	1708.26	1324.77	1066.94	T0+T5+T10	90.63	100.13	0	T0+T5	-0.80183	-1.36608	--	--	--	--
maker-scaffold10x_1257_pilon-snap-gene-0.73-mRNA-1	A0A4E0RLC7	A0A4E0RLC7|A0A4E0RLC7_FASHE_Soc-2_suppressor_of_clear_OS=Fasciola_hepatica_OX=6192_GN=D915_000899_PE=4_SV=1	4.24	7.9	12.49	T0+T5+T10	0	0	0	ND.	--	1.13619	--	--	--	--
maker-scaffold10x_1257_pilon-snap-gene-0.74-mRNA-1	A0A4E0S3W5	A0A4E0S3W5|A0A4E0S3W5_FASHE_Mitochondrial_inner_membrane_protease_subunit_1_OS=Fasciola_hepatica_OX=6192_GN=D915_000896_PE=4_SV=1	37.42	78.54	107.12	T0+T5+T10	0	0	0	ND.	0.590814	0.582681	--	--	--	--
maker-scaffold10x_1257_pilon-snap-gene-0.75-mRNA-1	A0A4E0RG74	A0A4E0RG74|A0A4E0RG74_FASHE_Kinesin_protein_OS=Fasciola_hepatica_OX=6192_GN=D915_002854_PE=3_SV=1	0.79	0.74	0.32	T0+T5+T10	0	0	0	ND.	--	--	--	--	--	--
maker-scaffold10x_1257_pilon-snap-gene-0.76-mRNA-1	A0A4E0R3K7	A0A4E0R3K7|A0A4E0R3K7_FASHE_L-aminoadipate-semialdehyde_dehydrogenase-phosphopantetheinyl_transferase_OS=Fasciola_hepatica_OX=6192_GN=D915_008368_PE=4_SV=1	3.03	4.21	4.39	T0+T5+T10	0	0	0	ND.	--	--	--	--	--	--
maker-scaffold10x_126_pilon-augustus-gene-0.0-mRNA-1	A0A4E0RBM9	A0A4E0RBM9|A0A4E0RBM9_FASHE_Serine/threonine-protein_kinase_OSR1_OS=Fasciola_hepatica_OX=6192_GN=D915_005022_PE=4_SV=1	103.87	114.9	112.28	T0+T5+T10	0	0	0	ND.	--	-0.582202	--	--	--	--
maker-scaffold10x_126_pilon-pred_gff_StringTie-gene-0.42-mRNA-1	A0A4E0RUZ9	A0A4E0RUZ9|A0A4E0RUZ9_FASHE_Polyubiquitin-C_OS=Fasciola_hepatica_OX=6192_GN=D915_010432_PE=4_SV=1	1653.41	1311.5	1180.85	T0+T5+T10	7624.16	8105.28	9312.83	T0+T5+T10	-0.804097	-1.27669	--	--	--	--
maker-scaffold10x_126_pilon-snap-gene-0.29-mRNA-1	A0A504WYI6	A0A504WYI6|A0A504WYI6_FASGI_Putative_ATP-dependent_RNA_helicase_OS=Fasciola_gigantica_OX=46835_GN=FGIG_11783_PE=4_SV=1	8.37	9.34	10.31	T0+T5+T10	0	0	0	ND.	--	--	--	--	--	--
maker-scaffold10x_126_pilon-snap-gene-0.30-mRNA-1	no hit	no hit	0	0.16	0	T5	0	0	0	ND.	--	--	--	--	--	--
maker-scaffold10x_126_pilon-snap-gene-0.31-mRNA-1	A0A4E0QYM4	A0A4E0QYM4|A0A4E0QYM4_FASHE_Tyrosine_3-monooxygenase/tryptophan_5-monooxygenase_activation_protein_theta_polypeptide_OS=Fasciola_hepatica_OX=6192_GN=D915_008636_PE=3_SV=1	1236.44	1254.45	1845.08	T0+T5+T10	7118.66	8073.88	9752.76	T0+T5+T10	-0.355657	--	--	--	--	--
maker-scaffold10x_126_pilon-snap-gene-0.32-mRNA-1	no hit	no hit	0.05	0.96	3.08	T0+T5+T10	0	0	0	ND.	4.10791	5.22372	--	--	--	--
maker-scaffold10x_126_pilon-snap-gene-0.33-mRNA-1	A0A4E0QXL6	A0A4E0QXL6|A0A4E0QXL6_FASHE_Pre-mRNA-splicing_factor_ATP-dependent_RNA_helicase_PRP16_OS=Fasciola_hepatica_OX=6192_GN=D915_009208_PE=4_SV=1	1.27	2.28	1.9	T0+T5+T10	0	0	0	ND.	--	--	--	--	--	--
maker-scaffold10x_126_pilon-snap-gene-0.35-mRNA-1	A0A4E0RXJ7	A0A4E0RXJ7|A0A4E0RXJ7_FASHE_Tyrosine_3-monooxygenase/tryptophan_5-monooxygenase_activation_protein_theta_polypeptide_OS=Fasciola_hepatica_OX=6192_GN=D915_008637_PE=3_SV=1	917.29	1139.28	1670.67	T0+T5+T10	1067.29	1322.94	1323.59	T0+T5+T10	--	--	--	--	--	--
maker-scaffold10x_126_pilon-snap-gene-0.36-mRNA-1	A0A4E0R3C4	A0A4E0R3C4|A0A4E0R3C4_FASHE_CUB_domain-containing_protein_OS=Fasciola_hepatica_OX=6192_GN=D915_008237_PE=4_SV=1	1.16	0.88	1.08	T0+T5+T10	0	0	0	ND.	--	--	--	--	--	--
maker-scaffold10x_126_pilon-snap-gene-0.37-mRNA-1	A0A504YUK3	A0A504YUK3|A0A504YUK3_FASGI_UPF0454_protein_C12orf49_OS=Fasciola_gigantica_OX=46835_GN=FGIG_00599_PE=4_SV=1	52.31	71.96	79.99	T0+T5+T10	0	0	0	ND.	--	--	--	--	--	--
maker-scaffold10x_126_pilon-snap-gene-0.38-mRNA-1	no hit	no hit	0.46	0	0	T0	0	0	0	ND.	--	--	--	--	--	--
maker-scaffold10x_1260_pilon-augustus-gene-0.5-mRNA-1	A0A4E0RL85	A0A4E0RL85|A0A4E0RL85_FASHE_Putative_myosin_heavy_chain_OS=Fasciola_hepatica_OX=6192_GN=D915_002148_PE=4_SV=1	0.75	0.26	0	T0+T5	0	0	0	ND.	--	-3.88968	--	--	--	--
maker-scaffold10x_1260_pilon-snap-gene-0.35-mRNA-1	A0A4E0R2H4	A0A4E0R2H4|A0A4E0R2H4_FASHE_GPI_mannosyltransferase_2_OS=Fasciola_hepatica_OX=6192_GN=D915_008981_PE=3_SV=1	6.42	7.89	17.53	T0+T5+T10	0	0	0	ND.	--	--	--	--	--	--
maker-scaffold10x_1260_pilon-snap-gene-0.37-mRNA-1	A0A4E0QWN4	A0A4E0QWN4|A0A4E0QWN4_FASHE_Cathepsin_d_lysosomal_aspartyl_protease_OS=Fasciola_hepatica_OX=6192_GN=D915_009700_PE=3_SV=1	3846.41	3387.2	2406.63	T0+T5+T10	1047.99	1288.93	1441.69	T0+T5+T10	-0.629659	-1.41251	-0.719509	--	--	--
maker-scaffold10x_1260_pilon-snap-gene-0.38-mRNA-1	A0A4E0RDR1	A0A4E0RDR1|A0A4E0RDR1_FASHE_Leucine-rich_repeat_and_WD_repeat-containing_protein_1_OS=Fasciola_hepatica_OX=6192_GN=D915_004183_PE=4_SV=1	12.21	40.83	29.81	T0+T5+T10	0	0	0	ND.	1.34798	0.779867	--	--	--	--
maker-scaffold10x_1260_pilon-snap-gene-0.39-mRNA-1	no hit	no hit	0.73	0.37	0.86	T0+T5+T10	0	0	0	ND.	--	--	--	--	--	--
maker-scaffold10x_1260_pilon-snap-gene-0.40-mRNA-1	A0A4E0RFW9	A0A4E0RFW9|A0A4E0RFW9_FASHE_BTB_domain-containing_protein_OS=Fasciola_hepatica_OX=6192_GN=D915_003838_PE=4_SV=1	2.26	3.72	2.62	T0+T5+T10	0	0	0	ND.	--	--	--	--	--	--
maker-scaffold10x_1260_pilon-snap-gene-0.43-mRNA-1	A0A4E0RHH5	A0A4E0RHH5|A0A4E0RHH5_FASHE_Glutamine-dependent_NAD(+)_synthetase_OS=Fasciola_hepatica_OX=6192_GN=D915_002149_PE=3_SV=1	7.59	11.55	17.67	T0+T5+T10	0	0	0	ND.	--	0.571073	--	--	--	--
maker-scaffold10x_1260_pilon-snap-gene-0.44-mRNA-1	A0A504YTD8	A0A504YTD8|A0A504YTD8_FASGI_PHD_finger_protein_rhino_OS=Fasciola_gigantica_OX=46835_GN=FGIG_01619_PE=4_SV=1	24.37	64.52	71.14	T0+T5+T10	0	0	0	ND.	1.07285	0.793129	--	--	--	--
maker-scaffold10x_1265_pilon-augustus-gene-0.23-mRNA-1	A0A4E0QYP6	A0A4E0QYP6|A0A4E0QYP6_FASHE_Protein_lin-54_OS=Fasciola_hepatica_OX=6192_GN=D915_008754_PE=4_SV=1	0.85	0	0.3	T0+T10	0	0	0	ND.	-6.1982	--	--	--	--	--
maker-scaffold10x_1265_pilon-snap-gene-0.16-mRNA-1	A0A4E0S3T4	A0A4E0S3T4|A0A4E0S3T4_FASHE_Fas-binding_factor_1_OS=Fasciola_hepatica_OX=6192_GN=D915_001175_PE=4_SV=1	24.04	13.8	9.71	T0+T5+T10	0	0	0	ND.	-0.916207	-1.90573	--	--	--	--
maker-scaffold10x_1265_pilon-snap-gene-0.17-mRNA-1	A0A4E0RH10	A0A4E0RH10|A0A4E0RH10_FASHE_Four_and_A_half_lim_domains_protein_OS=Fasciola_hepatica_OX=6192_GN=D915_001174_PE=4_SV=1	15.7	21.55	56.26	T0+T5+T10	0	0	0	ND.	--	1.16248	0.91155	--	--	--
maker-scaffold10x_127_pilon-augustus-gene-0.45-mRNA-1	no hit	no hit	28.75	55.55	54.08	T0+T5+T10	0	0	0	ND.	--	--	--	--	--	--
maker-scaffold10x_127_pilon-augustus-gene-0.46-mRNA-1	A0A4E0R2M4	A0A4E0R2M4|A0A4E0R2M4_FASHE_T-complex-associated_testis-expressed_protein_1_OS=Fasciola_hepatica_OX=6192_GN=D915_008278_PE=4_SV=1	0.2	0.27	0.15	T0+T5+T10	0	0	0	ND.	--	--	--	--	--	--
maker-scaffold10x_127_pilon-snap-gene-0.24-mRNA-1	A0A504Y716	A0A504Y716|A0A504Y716_FASGI_Transmembrane_9_superfamily_member_OS=Fasciola_gigantica_OX=46835_GN=FGIG_05864_PE=3_SV=1	36.76	67.72	71.3	T0+T5+T10	0	0	0	ND.	--	--	--	--	--	--
maker-scaffold10x_127_pilon-snap-gene-0.25-mRNA-1	F4ZMJ2	F4ZMJ2|F4ZMJ2_CLOSI_Enolase_OS=Clonorchis_sinensis_OX=79923_PE=2_SV=1	0	0	0	ND.	739.55	162.45	124.86	T0+T5+T10	--	--	--	--	--	--
maker-scaffold10x_127_pilon-snap-gene-0.26-mRNA-1	A0A4E0RZA5	A0A4E0RZA5|A0A4E0RZA5_FASHE_Putative_transcript_OS=Fasciola_hepatica_OX=6192_GN=D915_004664_PE=4_SV=1	0.09	0	0	T0	0	0	0	ND.	--	--	--	--	--	--
maker-scaffold10x_127_pilon-snap-gene-0.27-mRNA-1	A0A2H1C4X5	A0A2H1C4X5|A0A2H1C4X5_FASHE_Nucleoside-triphosphatase_THEP1_domain_protein_OS=Fasciola_hepatica_OX=6192_GN=D915_10503_PE=4_SV=1	33.14	42.31	45.46	T0+T5+T10	0	0	0	ND.	--	--	--	--	--	--
maker-scaffold10x_127_pilon-snap-gene-0.28-mRNA-1	no hit	no hit	0.15	7.95	6.05	T0+T5+T10	0	0	0	ND.	--	--	--	--	--	--
maker-scaffold10x_127_pilon-snap-gene-0.29-mRNA-1	no hit	no hit	90.74	86.71	93.66	T0+T5+T10	0	0	0	ND.	--	-0.544586	--	--	--	--
maker-scaffold10x_1272_pilon-augustus-gene-0.66-mRNA-1	A0A4E0R104	A0A4E0R104|A0A4E0R104_FASHE_TRAF-type_domain-containing_protein_OS=Fasciola_hepatica_OX=6192_GN=D915_008290_PE=4_SV=1	5.51	8.73	15.43	T0+T5+T10	0	0	0	ND.	--	0.696003	--	--	--	--
maker-scaffold10x_1272_pilon-augustus-gene-0.76-mRNA-1	A0A4E0RBP7	A0A4E0RBP7|A0A4E0RBP7_FASHE_Homeobox_protein_HMX3_OS=Fasciola_hepatica_OX=6192_GN=D915_004585_PE=4_SV=1	0	0	0.15	T10	0	0	0	ND.	--	--	--	--	--	--
maker-scaffold10x_1272_pilon-augustus-gene-0.82-mRNA-1	no hit	no hit	86.83	48.05	43.01	T0+T5+T10	0	0	0	ND.	-1.25866	-1.76852	--	--	--	--
maker-scaffold10x_1272_pilon-pred_gff_StringTie-gene-0.49-mRNA-1	A0A4E0RFF5	A0A4E0RFF5|A0A4E0RFF5_FASHE_DNA-directed_RNA_polymerase_I_subunit_RPA12_OS=Fasciola_hepatica_OX=6192_GN=D915_003659_PE=4_SV=1	40.54	36.87	39.86	T0+T5+T10	0	0	0	ND.	-0.487626	-0.691826	--	--	--	--
maker-scaffold10x_1272_pilon-snap-gene-0.10-mRNA-1	no hit	no hit	4.21	10.65	16.28	T0+T5+T10	0	0	0	ND.	--	1.49561	--	--	--	--
maker-scaffold10x_1272_pilon-snap-gene-0.12-mRNA-1	A0A4E0RGH2	A0A4E0RGH2|A0A4E0RGH2_FASHE_Ras_and_EF-hand_domain-containing_protein_OS=Fasciola_hepatica_OX=6192_GN=D915_002606_PE=4_SV=1	0.24	0	0	T0	0	0	0	ND.	--	--	--	--	--	--
maker-scaffold10x_1272_pilon-snap-gene-0.1-mRNA-1	A0A4E0RRP2	A0A4E0RRP2|A0A4E0RRP2_FASHE_Phosphatidylinositol_4-kinase_type-ii_OS=Fasciola_hepatica_OX=6192_GN=D915_000421_PE=4_SV=1	651.41	549.59	372.83	T0+T5+T10	0	0	0	ND.	-0.662758	-1.42722	-0.700718	--	--	--
maker-scaffold10x_1272_pilon-snap-gene-0.2-mRNA-1	A0A2H1CYB8	A0A2H1CYB8|A0A2H1CYB8_FASHE_Tudor_domain_protein_(Fragment)_OS=Fasciola_hepatica_OX=6192_GN=D915_00643_PE=4_SV=1	52.98	52.38	62.4	T0+T5+T10	0	0	0	ND.	--	-0.560241	--	--	--	--
maker-scaffold10x_1272_pilon-snap-gene-0.3-mRNA-1	A0A504YL68	A0A504YL68|A0A504YL68_FASGI_GATA-type_domain-containing_protein_OS=Fasciola_gigantica_OX=46835_GN=FGIG_04747_PE=4_SV=1	0.41	31.64	6.59	T0+T5+T10	0	0	0	ND.	6.08369	3.36806	--	--	--	--
maker-scaffold10x_1272_pilon-snap-gene-0.4-mRNA-1	A0A4E0RHG1	A0A4E0RHG1|A0A4E0RHG1_FASHE_RING-type_domain-containing_protein_OS=Fasciola_hepatica_OX=6192_GN=D915_002605_PE=4_SV=1	3.62	14.17	16.94	T0+T5+T10	0	0	0	ND.	1.10076	1.26543	--	--	--	--
maker-scaffold10x_1272_pilon-snap-gene-0.5-mRNA-1	A0A4E0R431	A0A4E0R431|A0A4E0R431_FASHE_Prefoldin_beta_subunit_OS=Fasciola_hepatica_OX=6192_GN=D915_008289_PE=4_SV=1	55.83	66.98	111.45	T0+T5+T10	0	0	0	ND.	--	--	0.773294	--	--	--
maker-scaffold10x_1272_pilon-snap-gene-0.7-mRNA-1	A0A4Z2DM64	A0A4Z2DM64|A0A4Z2DM64_SCHJA_Complement_component_C8_beta_OS=Schistosoma_japonicum_OX=6182_GN=EWB00_011333_PE=4_SV=1	12.08	15.63	17.15	T0+T5+T10	0	0	0	ND.	--	--	--	--	--	--
maker-scaffold10x_1272_pilon-snap-gene-0.8-mRNA-1	A0A4E0R9K1	A0A4E0R9K1|A0A4E0R9K1_FASHE_Lamin_OS=Fasciola_hepatica_OX=6192_GN=D915_003657_PE=3_SV=1	106.75	177.57	213.98	T0+T5+T10	258.75	278.39	64.7	T0+T5+T10	0.316951	--	--	--	--	-1.81912
maker-scaffold10x_1278_pilon-snap-gene-0.16-mRNA-1	A0A2H1CNS8	A0A2H1CNS8|A0A2H1CNS8_FASHE_Immunoglobulin_V-set_domain_protein_OS=Fasciola_hepatica_OX=6192_GN=D915_04065_PE=4_SV=1	1.67	1.28	1.09	T0+T5+T10	0	0	0	ND.	--	-1.43788	--	--	--	--
maker-scaffold10x_1279_pilon-augustus-gene-0.121-mRNA-1	A0A4E0RLQ3	A0A4E0RLQ3|A0A4E0RLQ3_FASHE_Cadherin_tumor_suppressor_OS=Fasciola_hepatica_OX=6192_GN=D915_000795_PE=4_SV=1	3.44	1.7	2.37	T0+T5+T10	0	0	0	ND.	--	--	--	--	--	--
maker-scaffold10x_1279_pilon-snap-gene-0.52-mRNA-1	A0A4E0S252	A0A4E0S252|A0A4E0S252_FASHE_Prefoldin_OS=Fasciola_hepatica_OX=6192_GN=D915_001960_PE=4_SV=1	0.41	0.4	0	T0+T5	0	0	0	ND.	--	-3.74329	--	--	--	--
maker-scaffold10x_1279_pilon-snap-gene-0.53-mRNA-1	no hit	no hit	2.74	2.81	3.44	T0+T5+T10	0	0	0	ND.	--	--	--	--	--	--
maker-scaffold10x_1279_pilon-snap-gene-0.54-mRNA-1	A0A504YH76	A0A504YH76|A0A504YH76_FASGI_Tyrosine-protein_kinase_OS=Fasciola_gigantica_OX=46835_GN=FGIG_08892_PE=3_SV=1	3.97	8.13	13.36	T0+T5+T10	0	0	0	ND.	--	0.968968	--	--	--	--
maker-scaffold10x_1279_pilon-snap-gene-0.55-mRNA-1	A0A4E0RQY0	A0A4E0RQY0|A0A4E0RQY0_FASHE_Acetyl_cholinesterase_OS=Fasciola_hepatica_OX=6192_GN=D915_006203_PE=4_SV=1	0.04	0.25	0.14	T0+T5+T10	0	0	0	ND.	--	--	--	--	--	--
maker-scaffold10x_1279_pilon-snap-gene-0.57-mRNA-1	no hit	no hit	0	0	0	ND.	43.5	0	0	T0	--	--	--	--	--	--
maker-scaffold10x_1279_pilon-snap-gene-0.60-mRNA-1	A0A504YIJ5	A0A504YIJ5|A0A504YIJ5_FASGI_Transmembrane_protein_87A_OS=Fasciola_gigantica_OX=46835_GN=FGIG_07098_PE=4_SV=1	151.66	101.66	119.22	T0+T5+T10	0	0	0	ND.	-0.902613	-1.02007	--	--	--	--
maker-scaffold10x_1279_pilon-snap-gene-0.61-mRNA-1	A0A504XGZ8	A0A504XGZ8|A0A504XGZ8_FASGI_Eukaryotic_translation_initiation_factor_3_subunit_I_OS=Fasciola_gigantica_OX=46835_GN=FGIG_00785_PE=3_SV=1	152.4	204.08	318.58	T0+T5+T10	173.45	256.56	0	T0+T5	--	--	--	--	--	--
maker-scaffold10x_1279_pilon-snap-gene-0.63-mRNA-1	A0A4E0RYI4	A0A4E0RYI4|A0A4E0RYI4_FASHE_LAG1_longevity_assurance_1_OS=Fasciola_hepatica_OX=6192_GN=D915_000161_PE=4_SV=1	24.91	33.78	27.79	T0+T5+T10	0	0	0	ND.	--	-0.621257	--	--	--	--
maker-scaffold10x_1279_pilon-snap-gene-0.65-mRNA-1	no hit	no hit	0.95	0	2.66	T0+T10	0	0	0	ND.	--	--	--	--	--	--
maker-scaffold10x_1280_pilon-snap-gene-0.10-mRNA-1	A0A4E0RTJ8	A0A4E0RTJ8|A0A4E0RTJ8_FASHE_Inositol-1-monophosphatase_OS=Fasciola_hepatica_OX=6192_GN=D915_005199_PE=3_SV=1	292.23	260.11	229.41	T0+T5+T10	0	0	0	ND.	-0.588231	-0.935488	--	--	--	--
maker-scaffold10x_1280_pilon-snap-gene-0.11-mRNA-1	A0A4E0R0K2	A0A4E0R0K2|A0A4E0R0K2_FASHE_Growth_factor_receptor-bound_protein_2-A_OS=Fasciola_hepatica_OX=6192_GN=D915_009275_PE=4_SV=1	62.63	113.16	108.24	T0+T5+T10	0	0	0	ND.	0.465727	--	--	--	--	--
maker-scaffold10x_1280_pilon-snap-gene-0.12-mRNA-1	no hit	no hit	6.04	6.62	6.12	T0+T5+T10	0	0	0	ND.	--	-0.797943	--	--	--	--
maker-scaffold10x_1280_pilon-snap-gene-0.13-mRNA-1	A0A4S2JVN3	A0A4S2JVN3|A0A4S2JVN3_OPIFE_Transcription_and_mRNA_export_factor_ENY2_OS=Opisthorchis_felineus_OX=147828_GN=CRM22_011267_PE=3_SV=1	44.41	52.6	102.05	T0+T5+T10	0	0	0	ND.	--	0.377058	0.540349	--	--	--
maker-scaffold10x_1280_pilon-snap-gene-0.5-mRNA-1	A0A4E0RA29	A0A4E0RA29|A0A4E0RA29_FASHE_Sodium-dependent_phosphate_transport_protein_1_OS=Fasciola_hepatica_OX=6192_GN=D915_005198_PE=4_SV=1	1.9	2.93	4.45	T0+T5+T10	0	0	0	ND.	--	--	--	--	--	--
maker-scaffold10x_1280_pilon-snap-gene-0.6-mRNA-1	Q5C4L6	Q5C4L6|Q5C4L6_SCHJA_SJCHGC03732_protein_(Fragment)_OS=Schistosoma_japonicum_OX=6182_PE=2_SV=2	0.13	0	0	T0	0	0	0	ND.	--	--	--	--	--	--
maker-scaffold10x_1280_pilon-snap-gene-0.7-mRNA-1	A0A4E0QZW8	A0A4E0QZW8|A0A4E0QZW8_FASHE_Sodium/potassium-transporting_ATPase_subunit_beta_OS=Fasciola_hepatica_OX=6192_GN=D915_008854_PE=4_SV=1	63.8	51.79	34.36	T0+T5+T10	0	0	0	ND.	-0.710086	-1.45708	--	--	--	--
maker-scaffold10x_1280_pilon-snap-gene-0.8-mRNA-1	A0A4E0R753	A0A4E0R753|A0A4E0R753_FASHE_Glutathione_synthetase_OS=Fasciola_hepatica_OX=6192_GN=D915_006479_PE=3_SV=1	18.85	26.26	43.54	T0+T5+T10	20.89	29.94	0	T0+T5	--	--	--	--	--	--
maker-scaffold10x_1280_pilon-snap-gene-0.9-mRNA-1	no hit	no hit	1.53	0.92	4.05	T0+T5+T10	0	0	0	ND.	--	--	--	--	--	--
maker-scaffold10x_1281_pilon-snap-gene-0.15-mRNA-1	A0A504YJ75	A0A504YJ75|A0A504YJ75_FASGI_ATP-dependent_RNA_helicase_OS=Fasciola_gigantica_OX=46835_GN=FGIG_09638_PE=3_SV=1	11.28	17.67	32.01	T0+T5+T10	0	0	0	ND.	--	0.665325	--	--	--	--
maker-scaffold10x_1281_pilon-snap-gene-0.16-mRNA-1	A0A4E0RZE7	A0A4E0RZE7|A0A4E0RZE7_FASHE_Helicase_domino_OS=Fasciola_hepatica_OX=6192_GN=D915_006847_PE=4_SV=1	0.19	0.17	0.12	T0+T5+T10	0	0	0	ND.	--	--	--	--	--	--
maker-scaffold10x_1281_pilon-snap-gene-0.17-mRNA-1	A0A4E0RZE7	A0A4E0RZE7|A0A4E0RZE7_FASHE_Helicase_domino_OS=Fasciola_hepatica_OX=6192_GN=D915_006847_PE=4_SV=1	3.36	18	15.96	T0+T5+T10	0	0	0	ND.	1.95268	1.92622	--	--	--	--
maker-scaffold10x_1281_pilon-snap-gene-0.19-mRNA-1	A0A2H1C595	A0A2H1C595|A0A2H1C595_FASHE_U3_small_nucleolar_RNA-associated_protein_23_OS=Fasciola_hepatica_OX=6192_GN=D915_006848_PE=4_SV=1	50.21	73.38	111.67	T0+T5+T10	0	0	0	ND.	--	0.492939	--	--	--	--
maker-scaffold10x_1282_pilon-snap-gene-0.2-mRNA-1	A0A4E0R1L3	A0A4E0R1L3|A0A4E0R1L3_FASHE_Putative_mitochondrial_ribosomal_protein_l12_strongylocentrotus_purpuratus_OS=Fasciola_hepatica_OX=6192_GN=D915_009879_PE=3_SV=1	22.38	30.58	54.08	T0+T5+T10	0	0	0	ND.	--	0.404734	--	--	--	--
maker-scaffold10x_1296_pilon-pred_gff_StringTie-gene-0.33-mRNA-1	Q6IFU3	Q6IFU3|Q6IFU3_SCHMA_Pol_polyprotein_(Fragment)_OS=Schistosoma_mansoni_OX=6183_PE=2_SV=1	16.43	11.97	10.91	T0+T5+T10	0	0	0	ND.	-0.932344	-0.991913	--	--	--	--
maker-scaffold10x_1296_pilon-pred_gff_StringTie-gene-0.42-mRNA-1	no hit	no hit	1.66	3.41	4.57	T0+T5+T10	0	0	0	ND.	0.738245	0.687193	--	--	--	--
maker-scaffold10x_1296_pilon-snap-gene-0.11-mRNA-1	A0A4E0R6U2	A0A4E0R6U2|A0A4E0R6U2_FASHE_ATP-dependent_(S)-NAD(P)H-hydrate_dehydratase_OS=Fasciola_hepatica_OX=6192_GN=D915_007897_PE=3_SV=1	57.1	44.82	33.36	T0+T5+T10	83.38	196.04	77.49	T0+T5+T10	-0.793103	-1.45702	-0.599681	--	--	--
maker-scaffold10x_1296_pilon-snap-gene-0.15-mRNA-1	A0A2H1BWF1	A0A2H1BWF1|A0A2H1BWF1_FASHE_Peptidyl-prolyl_cis-trans_isomerase_OS=Fasciola_hepatica_OX=6192_GN=D915_009870_PE=3_SV=1	267.56	411.13	467.23	T0+T5+T10	130.24	226.73	123.41	T0+T5+T10	--	--	--	--	--	--
maker-scaffold10x_1296_pilon-snap-gene-0.16-mRNA-1	no hit	no hit	3.26	6.69	17.62	T0+T5+T10	0	0	0	ND.	1.13403	1.63819	--	--	--	--
maker-scaffold10x_1296_pilon-snap-gene-0.17-mRNA-1	A0A504YMY7	A0A504YMY7|A0A504YMY7_FASGI_Srebp_protein_(Fragment)_OS=Fasciola_gigantica_OX=46835_GN=FGIG_11295_PE=4_SV=1	42.24	96.46	90.83	T0+T5+T10	0	0	0	ND.	0.581126	--	--	--	--	--
maker-scaffold10x_1296_pilon-snap-gene-0.18-mRNA-1	A0A3Q0KBB7	A0A3Q0KBB7|A0A3Q0KBB7_SCHMA_Ndr_family,_putative_OS=Schistosoma_mansoni_OX=6183_PE=4_SV=1	0.77	1.92	1.47	T0+T5+T10	0	0	0	ND.	--	--	--	--	--	--
maker-scaffold10x_1296_pilon-snap-gene-0.19-mRNA-1	A0A504YI75	A0A504YI75|A0A504YI75_FASGI_Glycyl-tRNA_synthetase_(Fragment)_OS=Fasciola_gigantica_OX=46835_GN=FGIG_10353_PE=4_SV=1	16.22	27.93	29.91	T0+T5+T10	140.42	127.52	134.81	T0+T5+T10	--	--	--	--	--	--
maker-scaffold10x_1299_pilon-augustus-gene-0.27-mRNA-1	no hit	no hit	2.49	0	1.3	T0+T10	0	0	0	ND.	--	--	--	--	--	--
maker-scaffold10x_1299_pilon-pred_gff_StringTie-gene-0.1-mRNA-1	A0A2H1C9M4	A0A2H1C9M4|A0A2H1C9M4_FASHE_FAD_dependent_oxidoreductase_OS=Fasciola_hepatica_OX=6192_GN=D915_09458_PE=4_SV=1	1.92	2.24	2.23	T0+T5+T10	0	0	0	ND.	--	--	--	--	--	--
maker-scaffold10x_1299_pilon-snap-gene-0.17-mRNA-1	A0A504YFY1	A0A504YFY1|A0A504YFY1_FASGI_ELMO_domain-containing_protein_2_OS=Fasciola_gigantica_OX=46835_GN=FGIG_00813_PE=4_SV=1	90.51	111.44	128.58	T0+T5+T10	0	0	0	ND.	--	--	--	--	--	--
maker-scaffold10x_1299_pilon-snap-gene-0.18-mRNA-1	A0A4E0QWL8	A0A4E0QWL8|A0A4E0QWL8_FASHE_28S_ribosomal_protein_S25_mitochondrial_OS=Fasciola_hepatica_OX=6192_GN=D915_009756_PE=4_SV=1	3.4	3.58	4.43	T0+T5+T10	0	0	0	ND.	--	--	--	--	--	--
maker-scaffold10x_1299_pilon-snap-gene-0.19-mRNA-1	A0A4E0RDV1	A0A4E0RDV1|A0A4E0RDV1_FASHE_Nephrin_OS=Fasciola_hepatica_OX=6192_GN=D915_004791_PE=4_SV=1	0.03	0	0	T0	0	0	0	ND.	--	--	--	--	--	--
maker-scaffold10x_1299_pilon-snap-gene-0.20-mRNA-1	G7YEL9	G7YEL9|G7YEL9_CLOSI_Protein_FAM136A_OS=Clonorchis_sinensis_OX=79923_GN=CLF_106051_PE=4_SV=1	96.95	156.12	288.25	T0+T5+T10	0	0	0	ND.	--	0.84029	0.575587	--	--	--
maker-scaffold10x_13_pilon-augustus-gene-0.17-mRNA-1	A0A1S8X659	A0A1S8X659|A0A1S8X659_9TREM_Ig-like_domain-containing_protein_(Fragment)_OS=Opisthorchis_viverrini_OX=6198_GN=X801_01918_PE=4_SV=1	1.83	2.62	3.64	T0+T5+T10	0	0	0	ND.	--	--	--	--	--	--
maker-scaffold10x_13_pilon-augustus-gene-0.26-mRNA-1	A0A4E0R8Y6	A0A4E0R8Y6|A0A4E0R8Y6_FASHE_4-hydroxybenzoate_polyprenyltransferase,_mitochondrial_OS=Fasciola_hepatica_OX=6192_GN=D915_005586_PE=3_SV=1	27.79	22.38	57.54	T0+T5+T10	0	0	0	ND.	--	--	1.02749	--	--	--
maker-scaffold10x_13_pilon-augustus-gene-0.27-mRNA-1	A0A4E0RZP0	A0A4E0RZP0|A0A4E0RZP0_FASHE_Magnesium_transporter_NIPA2_OS=Fasciola_hepatica_OX=6192_GN=D915_000930_PE=4_SV=1	34.51	39.48	45.13	T0+T5+T10	0	0	0	ND.	--	--	--	--	--	--
maker-scaffold10x_13_pilon-augustus-gene-1.104-mRNA-1	A0A4E0RYE1	A0A4E0RYE1|A0A4E0RYE1_FASHE_Solute_carrier_family_25_member_OS=Fasciola_hepatica_OX=6192_GN=D915_007857_PE=3_SV=1	135.88	233.47	280.7	T0+T5+T10	0	0	0	ND.	--	--	--	--	--	--
maker-scaffold10x_13_pilon-augustus-gene-1.92-mRNA-1	A0A4E0S0Z4	A0A4E0S0Z4|A0A4E0S0Z4_FASHE_Annexin_OS=Fasciola_hepatica_OX=6192_GN=D915_003086_PE=3_SV=1	1230.94	1042.57	728.89	T0+T5+T10	3632.38	3356.74	5458.33	T0+T5+T10	-0.726993	-1.38517	-0.594698	--	--	0.823451
maker-scaffold10x_13_pilon-augustus-gene-1.93-mRNA-1	A0A4E0RB60	A0A4E0RB60|A0A4E0RB60_FASHE_Potassium_channel_subfamily_K_8_OS=Fasciola_hepatica_OX=6192_GN=D915_004051_PE=3_SV=1	0.06	0.39	0.49	T0+T5+T10	0	0	0	ND.	--	--	--	--	--	--
maker-scaffold10x_13_pilon-augustus-gene-2.149-mRNA-1	A0A4E0RZH0	A0A4E0RZH0|A0A4E0RZH0_FASHE_DNA-binding_death_effector_domain-containing_protein_OS=Fasciola_hepatica_OX=6192_GN=D915_004408_PE=4_SV=1	1.57	3.03	3.27	T0+T5+T10	0	0	0	ND.	--	--	--	--	--	--
maker-scaffold10x_13_pilon-augustus-gene-2.152-mRNA-1	A0A4E0R989	A0A4E0R989|A0A4E0R989_FASHE_Tyrosine-protein_kinase_OS=Fasciola_hepatica_OX=6192_GN=D915_005671_PE=3_SV=1	165.07	153.32	118.4	T0+T5+T10	0	0	0	ND.	-0.44513	-1.08469	-0.575236	--	--	--
maker-scaffold10x_13_pilon-augustus-gene-2.154-mRNA-1	A0A4E0QTC6	A0A4E0QTC6|A0A4E0QTC6_FASHE_tRNA_aspartic_acid_methyltransferase_1_OS=Fasciola_hepatica_OX=6192_GN=D915_009706_PE=3_SV=1	4.67	5.7	10.05	T0+T5+T10	0	0	0	ND.	--	--	--	--	--	--
maker-scaffold10x_13_pilon-augustus-gene-2.155-mRNA-1	no hit	no hit	2.96	9.75	10.46	T0+T5+T10	0	0	0	ND.	1.26436	1.00825	--	--	--	--
maker-scaffold10x_13_pilon-augustus-gene-2.161-mRNA-1	A0A4E0S1K6	A0A4E0S1K6|A0A4E0S1K6_FASHE_DH_domain-containing_protein_OS=Fasciola_hepatica_OX=6192_GN=D915_002133_PE=4_SV=1	175.81	135.62	83.56	T0+T5+T10	0	0	0	ND.	-0.803178	-1.61865	-0.7527	--	--	--
maker-scaffold10x_13_pilon-augustus-gene-2.165-mRNA-1	A0A2H1C2I5	A0A2H1C2I5|A0A2H1C2I5_FASHE_PurA_ssDNA_and_RNA-binding_protein_OS=Fasciola_hepatica_OX=6192_GN=D915_007786_PE=4_SV=1	290.85	243.69	478.47	T0+T5+T10	0	0	0	ND.	-0.54301	--	0.713904	--	--	--
maker-scaffold10x_13_pilon-augustus-gene-2.166-mRNA-1	A0A4E0RVN1	A0A4E0RVN1|A0A4E0RVN1_FASHE_Putative_rab_subfamily_protein_of_small_gtpase_OS=Fasciola_hepatica_OX=6192_GN=D915_007346_PE=4_SV=1	93.4	96.34	125.77	T0+T5+T10	0	0	0	ND.	--	--	--	--	--	--
maker-scaffold10x_13_pilon-augustus-gene-2.167-mRNA-1	A0A4E0RKN6	A0A4E0RKN6|A0A4E0RKN6_FASHE_Family_S60_non_peptidase_ue_(S60_family)_OS=Fasciola_hepatica_OX=6192_GN=D915_002859_PE=3_SV=1	0	0.83	3.04	T5+T10	0	0	0	ND.	--	6.71423	--	--	--	--
maker-scaffold10x_13_pilon-pred_gff_StringTie-gene-2.12-mRNA-1	no hit	no hit	4978.25	4362.4	3652.97	T0+T5+T10	0	0	0	ND.	-0.633005	-1.12278	--	--	--	--
maker-scaffold10x_13_pilon-snap-gene-0.64-mRNA-1	A0A4E0RTI3	A0A4E0RTI3|A0A4E0RTI3_FASHE_NAD-dependent_protein_deacylase_OS=Fasciola_hepatica_OX=6192_GN=D915_004347_PE=3_SV=1	2.81	3.46	5.55	T0+T5+T10	0	0	0	ND.	--	--	--	--	--	--
maker-scaffold10x_13_pilon-snap-gene-0.65-mRNA-1	no hit	no hit	0.96	0.14	0.74	T0+T5+T10	0	0	0	ND.	--	--	--	--	--	--
maker-scaffold10x_13_pilon-snap-gene-0.67-mRNA-1	A0A4E0RJA3	A0A4E0RJA3|A0A4E0RJA3_FASHE_Putative_Core_1_udp-galactose:n-acetylgalactosamine-alpha-r_beta_1_3-galactosyltransferase_OS=Fasciola_hepatica_OX=6192_GN=D915_000929_PE=4_SV=1	0.77	0	0	T0	0	0	0	ND.	--	--	--	--	--	--
maker-scaffold10x_13_pilon-snap-gene-0.69-mRNA-1	A0A2H1CWC9	A0A2H1CWC9|A0A2H1CWC9_FASHE_Acetyltransferase,_GNAT_family_OS=Fasciola_hepatica_OX=6192_GN=D915_00593_PE=4_SV=1	144.83	157.81	186.7	T0+T5+T10	0	0	0	ND.	--	--	--	--	--	--
maker-scaffold10x_13_pilon-snap-gene-0.70-mRNA-1	A0A4E0RYA8	A0A4E0RYA8|A0A4E0RYA8_FASHE_Homeobox_protein_araucan_OS=Fasciola_hepatica_OX=6192_GN=D915_000394_PE=4_SV=1	0	2.2	2.32	T5+T10	0	0	0	ND.	7.51459	7.14089	--	--	--	--
maker-scaffold10x_13_pilon-snap-gene-0.71-mRNA-1	A0A4Z2DWX7	A0A4Z2DWX7|A0A4Z2DWX7_SCHJA_Dolichol-phosphate_mannosyltransferase_subunit_1_OS=Schistosoma_japonicum_OX=6182_GN=EWB00_001366_PE=3_SV=1	827.87	859.02	845.33	T0+T5+T10	103.07	207.01	167.55	T0+T5+T10	-0.448932	-0.771119	--	--	--	--
maker-scaffold10x_13_pilon-snap-gene-0.72-mRNA-1	A0A1S8WXW9	A0A1S8WXW9|A0A1S8WXW9_9TREM_Ubiquitin--protein_ligase_OS=Opisthorchis_viverrini_OX=6198_GN=X801_04772_PE=3_SV=1	1196.88	1067.61	780.18	T0+T5+T10	0	0	0	ND.	-0.590987	-1.20728	-0.552524	--	--	--
maker-scaffold10x_13_pilon-snap-gene-0.75-mRNA-1	A0A4E0RZJ1	A0A4E0RZJ1|A0A4E0RZJ1_FASHE_U3_small_nucleolar_rna_associated_protein_6_OS=Fasciola_hepatica_OX=6192_GN=D915_004050_PE=4_SV=1	31.45	41.91	45.7	T0+T5+T10	0	0	0	ND.	--	--	--	--	--	--
maker-scaffold10x_13_pilon-snap-gene-0.76-mRNA-1	A0A4E0RBT7	A0A4E0RBT7|A0A4E0RBT7_FASHE_Dynactin_subunit_1_OS=Fasciola_hepatica_OX=6192_GN=D915_005433_PE=4_SV=1	15.12	24.08	28.81	T0+T5+T10	0	0	0	ND.	--	--	--	--	--	--
maker-scaffold10x_13_pilon-snap-gene-0.78-mRNA-1	no hit	no hit	1.06	0.42	0.15	T0+T5+T10	0	0	0	ND.	--	--	--	--	--	--
maker-scaffold10x_13_pilon-snap-gene-0.80-mRNA-1	A0A4E0S463	A0A4E0S463|A0A4E0S463_FASHE_ATP_dependent_zinc_metalloprotease_YME1_OS=Fasciola_hepatica_OX=6192_GN=D915_000396_PE=3_SV=1	27.04	51.64	82.65	T0+T5+T10	5.63	6.99	0	T0+T5	--	0.754286	--	--	--	-2.83686
maker-scaffold10x_13_pilon-snap-gene-0.81-mRNA-1	A0A183ACZ4	A0A183ACZ4|A0A183ACZ4_9TREM_MIEAP_domain-containing_protein_OS=Echinostoma_caproni_OX=27848_GN=ECPE_LOCUS4829_PE=4_SV=1	0.31	2.15	1.99	T0+T5+T10	0	0	0	ND.	2.86605	--	--	--	--	--
maker-scaffold10x_13_pilon-snap-gene-1.65-mRNA-1	A0A2H1CJT1	A0A2H1CJT1|A0A2H1CJT1_FASHE_Small_ubiquitin-related_modifier_OS=Fasciola_hepatica_OX=6192_GN=D915_003085_PE=3_SV=1	633.04	939.21	1663.52	T0+T5+T10	0	391.03	0	T5	--	0.783053	0.619738	--	--	0.693771
maker-scaffold10x_13_pilon-snap-gene-1.69-mRNA-1	A0A4E0REU0	A0A4E0REU0|A0A4E0REU0_FASHE_Tousled_kinase_OS=Fasciola_hepatica_OX=6192_GN=D915_004052_PE=4_SV=1	5.85	11.85	9.52	T0+T5+T10	0	0	0	ND.	--	--	--	--	--	--
maker-scaffold10x_13_pilon-snap-gene-1.70-mRNA-1	A0A504YFY9	A0A504YFY9|A0A504YFY9_FASGI_Orotidine_5'-phosphate_decarboxylase_OS=Fasciola_gigantica_OX=46835_GN=FGIG_07808_PE=3_SV=1	0.04	0.19	0.29	T0+T5+T10	0	3.67	0	T5	--	1.74788	--	--	--	-2.55511
maker-scaffold10x_13_pilon-snap-gene-1.71-mRNA-1	A0A4E0R9P0	A0A4E0R9P0|A0A4E0R9P0_FASHE_Rab-gap/tbc_OS=Fasciola_hepatica_OX=6192_GN=D915_005585_PE=4_SV=1	0.13	0	0	T0	0	0	0	ND.	--	--	--	--	--	--
maker-scaffold10x_13_pilon-snap-gene-1.72-mRNA-1	A0A4E0RJ45	A0A4E0RJ45|A0A4E0RJ45_FASHE_Rhomboid_domain-containing_protein_OS=Fasciola_hepatica_OX=6192_GN=D915_003088_PE=4_SV=1	0.31	0.27	0	T0+T5	0	0	0	ND.	--	--	--	--	--	--
maker-scaffold10x_13_pilon-snap-gene-1.73-mRNA-1	A0A504YR64	A0A504YR64|A0A504YR64_FASGI_Zinc_finger_protein_OS=Fasciola_gigantica_OX=46835_GN=FGIG_03186_PE=4_SV=1	4.58	9.12	11.05	T0+T5+T10	0	0	0	ND.	--	0.820616	--	--	--	--
maker-scaffold10x_13_pilon-snap-gene-1.74-mRNA-1	A0A4E0S0U9	A0A4E0S0U9|A0A4E0S0U9_FASHE_UDP-glucose_ceramide_glucosyltransferase_OS=Fasciola_hepatica_OX=6192_GN=D915_005138_PE=4_SV=1	221.15	241.78	129.22	T0+T5+T10	0	0	0	ND.	--	-1.34993	-1.00822	--	--	--
maker-scaffold10x_13_pilon-snap-gene-1.75-mRNA-1	no hit	no hit	0	0	0	ND.	74.68	0	0	T0	--	--	--	--	--	--
maker-scaffold10x_13_pilon-snap-gene-1.76-mRNA-1	A0A4E0REM9	A0A4E0REM9|A0A4E0REM9_FASHE_LAG1_longevity_assurance_4_OS=Fasciola_hepatica_OX=6192_GN=D915_004410_PE=4_SV=1	29.2	26.19	21.45	T0+T5+T10	0	0	0	ND.	--	-1.21563	--	--	--	--
maker-scaffold10x_13_pilon-snap-gene-1.77-mRNA-1	A0A4E0R727	A0A4E0R727|A0A4E0R727_FASHE_tRNA_5-methylaminomethyl-2-thiouridylate_methyltransferase_OS=Fasciola_hepatica_OX=6192_GN=D915_007858_PE=4_SV=1	0.78	0.94	0	T0+T5	0	0	0	ND.	--	--	--	--	--	--
maker-scaffold10x_13_pilon-snap-gene-1.79-mRNA-1	A0A419Q1N7	A0A419Q1N7|A0A419Q1N7_CLOSI_Mannosyl-oligosaccharide_glucosidase_OS=Clonorchis_sinensis_OX=79923_GN=Mogs_PE=4_SV=1	0.13	0	0	T0	0	0	0	ND.	--	--	--	--	--	--
maker-scaffold10x_13_pilon-snap-gene-1.80-mRNA-1	A0A4E0RST2	A0A4E0RST2|A0A4E0RST2_FASHE_Exocyst_complex_component_4_OS=Fasciola_hepatica_OX=6192_GN=D915_005672_PE=4_SV=1	30.94	39.55	37.23	T0+T5+T10	0	0	0	ND.	--	-0.497093	--	--	--	--
maker-scaffold10x_13_pilon-snap-gene-1.81-mRNA-1	A0A4E0R8P6	A0A4E0R8P6|A0A4E0R8P6_FASHE_ATP-dependent_RNA_helicase_DDX51_OS=Fasciola_hepatica_OX=6192_GN=D915_006805_PE=3_SV=1	12.87	15.03	16.35	T0+T5+T10	0	0	0	ND.	--	--	--	--	--	--
maker-scaffold10x_13_pilon-snap-gene-1.82-mRNA-1	A0A4E0R8P6	A0A4E0R8P6|A0A4E0R8P6_FASHE_ATP-dependent_RNA_helicase_DDX51_OS=Fasciola_hepatica_OX=6192_GN=D915_006805_PE=3_SV=1	7.52	7.11	3.78	T0+T5+T10	0	0	0	ND.	--	-1.47615	--	--	--	--
maker-scaffold10x_13_pilon-snap-gene-2.116-mRNA-1	A0A4E0R727	A0A4E0R727|A0A4E0R727_FASHE_tRNA_5-methylaminomethyl-2-thiouridylate_methyltransferase_OS=Fasciola_hepatica_OX=6192_GN=D915_007858_PE=4_SV=1	6.57	9.81	17.94	T0+T5+T10	0	0	0	ND.	--	--	--	--	--	--
maker-scaffold10x_13_pilon-snap-gene-2.117-mRNA-1	A0A2H1BSK7	A0A2H1BSK7|A0A2H1BSK7_FASHE_Mannosyl-oligosaccharide_glucosidase_GCS1_OS=Fasciola_hepatica_OX=6192_GN=D915_011019_PE=4_SV=1	27.74	34.68	33.14	T0+T5+T10	0	35.99	0	T5	--	-0.56201	--	3.47055	--	--
maker-scaffold10x_13_pilon-snap-gene-2.119-mRNA-1	A0A504YW14	A0A504YW14|A0A504YW14_FASGI_Mitochondrial_ribosomal_protein_L47_OS=Fasciola_gigantica_OX=46835_GN=FGIG_03496_PE=4_SV=1	1.33	1.7	1.82	T0+T5+T10	0	0	0	ND.	--	--	--	--	--	--
maker-scaffold10x_13_pilon-snap-gene-2.120-mRNA-1	A0A4E0RFM1	A0A4E0RFM1|A0A4E0RFM1_FASHE_Speckle-type_POZ_protein_OS=Fasciola_hepatica_OX=6192_GN=D915_002858_PE=4_SV=1	14.74	35.27	28.38	T0+T5+T10	0	0	0	ND.	--	--	--	--	--	--
maker-scaffold10x_13_pilon-snap-gene-2.123-mRNA-1	A0A504Z3B6	A0A504Z3B6|A0A504Z3B6_FASGI_Phosphorylase_b_kinase_regulatory_subunit_OS=Fasciola_gigantica_OX=46835_GN=FGIG_08883_PE=3_SV=1	37.95	50.3	42.19	T0+T5+T10	0	0	0	ND.	--	-0.498324	--	--	--	--
maker-scaffold10x_13_pilon-snap-gene-2.124-mRNA-1	A0A2H1BV27	A0A2H1BV27|A0A2H1BV27_FASHE_Bud_site_selection_protein_20_OS=Fasciola_hepatica_OX=6192_GN=D915_009558_PE=4_SV=1	27.68	46.89	68.49	T0+T5+T10	0	0	0	ND.	--	0.561444	--	--	--	--
maker-scaffold10x_13_pilon-snap-gene-2.125-mRNA-1	A0A498LNN2	A0A498LNN2|A0A498LNN2_LABRO_Tubulin_alpha-1C_chain_OS=Labeo_rohita_OX=84645_GN=ROHU_031151_PE=3_SV=1	0	0	0	ND.	3675.03	706.08	1228.73	T0+T5+T10	--	--	--	--	--	--
maker-scaffold10x_13_pilon-snap-gene-2.129-mRNA-1	A0A4E0RB13	A0A4E0RB13|A0A4E0RB13_FASHE_Tubulin_alpha_chain_OS=Fasciola_hepatica_OX=6192_GN=D915_005431_PE=3_SV=1	0	0	0	ND.	10381.8	2128.29	2640.85	T0+T5+T10	--	--	--	-2.88509	--	--
maker-scaffold10x_13_pilon-snap-gene-2.130-mRNA-1	Q5DBH8	Q5DBH8|Q5DBH8_SCHJA_SJCHGC09446_protein_OS=Schistosoma_japonicum_OX=6182_PE=2_SV=1	0	0	0.04	T10	0	0	0	ND.	--	--	--	--	--	--
maker-scaffold10x_13_pilon-snap-gene-2.132-mRNA-1	A0A4E0RJA7	A0A4E0RJA7|A0A4E0RJA7_FASHE_DNA_repair_protein_RAD51_like_protein_3_OS=Fasciola_hepatica_OX=6192_GN=D915_002132_PE=4_SV=1	182.34	120.86	75.85	T0+T5+T10	0	0	0	ND.	-0.868869	-1.62427	--	--	--	--
maker-scaffold10x_13_pilon-snap-gene-2.133-mRNA-1	A0A4E0RP27	A0A4E0RP27|A0A4E0RP27_FASHE_3-hydroxyisobutyryl-CoA_hydrolase,_mitochondrial_OS=Fasciola_hepatica_OX=6192_GN=D915_000386_PE=3_SV=1	172.81	181.36	107.93	T0+T5+T10	0	0	0	ND.	-0.455333	-1.08866	--	--	--	--
maker-scaffold10x_13_pilon-snap-gene-2.134-mRNA-1	A0A4E0RIQ1	A0A4E0RIQ1|A0A4E0RIQ1_FASHE_T-box_transcription_factor_TBX1_OS=Fasciola_hepatica_OX=6192_GN=D915_000384_PE=4_SV=1	19.39	14.07	7.24	T0+T5+T10	0	0	0	ND.	-0.891491	-2.03692	--	--	--	--
maker-scaffold10x_13_pilon-snap-gene-2.140-mRNA-1	A0A2H1BTZ4	A0A2H1BTZ4|A0A2H1BTZ4_FASHE_Estrone_sulfotransferase_OS=Fasciola_hepatica_OX=6192_GN=D915_009705_PE=4_SV=1	88.78	109.22	116.91	T0+T5+T10	0	0	0	ND.	--	--	--	--	--	--
maker-scaffold10x_13_pilon-snap-gene-2.142-mRNA-1	A0A4E0R9Q6	A0A4E0R9Q6|A0A4E0R9Q6_FASHE_FNIP_C_domain-containing_protein_OS=Fasciola_hepatica_OX=6192_GN=D915_005432_PE=4_SV=1	5.28	10.97	12.01	T0+T5+T10	0	0	0	ND.	--	--	--	--	--	--
maker-scaffold10x_13_pilon-snap-gene-2.144-mRNA-1	A0A4E0S2X8	A0A4E0S2X8|A0A4E0S2X8_FASHE_Disintegrin_and_metalloproteinase_domain-containing_protein_15_OS=Fasciola_hepatica_OX=6192_GN=D915_002131_PE=4_SV=1	0.36	0.52	0.54	T0+T5+T10	0	0	0	ND.	--	--	--	--	--	--
maker-scaffold10x_13_pilon-snap-gene-2.145-mRNA-1	A0A4E0S0A3	A0A4E0S0A3|A0A4E0S0A3_FASHE_UPF0577_protein_OS=Fasciola_hepatica_OX=6192_GN=D915_000382_PE=4_SV=1	9.84	23.46	15.24	T0+T5+T10	0	0	0	ND.	0.776125	--	--	--	--	--
maker-scaffold10x_13_pilon-snap-gene-2.146-mRNA-1	A0A4E0RYK4	A0A4E0RYK4|A0A4E0RYK4_FASHE_PH_domain-containing_protein_OS=Fasciola_hepatica_OX=6192_GN=D915_005329_PE=4_SV=1	5.75	5.49	8.24	T0+T5+T10	0	0	0	ND.	--	--	--	--	--	--
maker-scaffold10x_13_pilon-snap-gene-2.147-mRNA-1	A0A4E0R067	A0A4E0R067|A0A4E0R067_FASHE_Actin-related_protein_8_OS=Fasciola_hepatica_OX=6192_GN=D915_007787_PE=3_SV=1	3.71	6.05	6.26	T0+T5+T10	0	0	0	ND.	--	--	--	--	--	--
maker-scaffold10x_13_pilon-snap-gene-2.148-mRNA-1	no hit	no hit	28.64	23.4	11.09	T0+T5+T10	0	0	0	ND.	--	-1.88902	-1.14806	--	--	--
maker-scaffold10x_1302_pilon-snap-gene-0.17-mRNA-1	A0A4E0R0I3	A0A4E0R0I3|A0A4E0R0I3_FASHE_Zinc_finger_protein_OS=Fasciola_hepatica_OX=6192_GN=D915_010149_PE=4_SV=1	10.2	43.04	31.46	T0+T5+T10	0	0	0	ND.	1.53788	0.968178	--	--	--	--
maker-scaffold10x_1302_pilon-snap-gene-0.19-mRNA-1	no hit	no hit	63.92	49.35	44.12	T0+T5+T10	168.17	235.41	211.51	T0+T5+T10	-0.774614	-1.29466	--	--	--	--
maker-scaffold10x_1302_pilon-snap-gene-0.20-mRNA-1	A0A4E0RDU9	A0A4E0RDU9|A0A4E0RDU9_FASHE_Zinc_finger_protein_OS=Fasciola_hepatica_OX=6192_GN=D915_002004_PE=4_SV=1	0	0	1.41	T10	0	0	0	ND.	--	--	--	--	--	--
maker-scaffold10x_1302_pilon-snap-gene-0.21-mRNA-1	A0A504ZER1	A0A504ZER1|A0A504ZER1_FASGI_Transmembrane_protein_OS=Fasciola_gigantica_OX=46835_GN=FGIG_10666_PE=4_SV=1	32.63	70.52	121.87	T0+T5+T10	0	0	0	ND.	0.75678	1.18429	--	--	--	--
maker-scaffold10x_1304_pilon-augustus-gene-0.5-mRNA-1	A0A094ZL85	A0A094ZL85|A0A094ZL85_SCHHA_Protein_FAM221A_(Fragment)_OS=Schistosoma_haematobium_OX=6185_GN=MS3_02961_PE=4_SV=1	1.08	0	0	T0	0	0	0	ND.	--	--	--	--	--	--
maker-scaffold10x_1304_pilon-augustus-gene-0.6-mRNA-1	A0A504Y6Q3	A0A504Y6Q3|A0A504Y6Q3_FASGI_Dual_specificity_tyrosine-phosphorylation-regulated_kinase_1B_OS=Fasciola_gigantica_OX=46835_GN=FGIG_00786_PE=4_SV=1	1.94	3.45	3.34	T0+T5+T10	0	0	0	ND.	--	--	--	--	--	--
maker-scaffold10x_1304_pilon-snap-gene-0.41-mRNA-1	A0A2H1C9A7	A0A2H1C9A7|A0A2H1C9A7_FASHE_RT_RNaseH_domain-containing_protein_OS=Fasciola_hepatica_OX=6192_GN=D915_08839_PE=4_SV=1	1.57	7.84	10.67	T0+T5+T10	0	0	0	ND.	2.2542	2.52937	--	--	--	--
maker-scaffold10x_1304_pilon-snap-gene-0.42-mRNA-1	no hit	no hit	0.98	1.02	2.78	T0+T5+T10	0	0	0	ND.	--	--	--	--	--	--
maker-scaffold10x_1304_pilon-snap-gene-0.46-mRNA-1	H2KSW7	H2KSW7|H2KSW7_CLOSI_NADH_dehydrogenase_(Ubiquinone)_Fe-S_protein_2_OS=Clonorchis_sinensis_OX=79923_GN=CLF_110619_PE=3_SV=1	17.56	39.28	49.65	T0+T5+T10	0	8.27	0	T5	--	0.694344	--	--	--	--
maker-scaffold10x_1306_pilon-pred_gff_StringTie-gene-0.8-mRNA-1	A0A5J4NSP7	A0A5J4NSP7|A0A5J4NSP7_9TREM_Reverse_transcriptase_domain-containing_protein_OS=Paragonimus_westermani_OX=34504_GN=DEA37_0014606_PE=4_SV=1	1.97	1.59	2.28	T0+T5+T10	0	0	0	ND.	--	--	--	--	--	--
maker-scaffold10x_1306_pilon-snap-gene-0.14-mRNA-1	A0A4E0RLZ4	A0A4E0RLZ4|A0A4E0RLZ4_FASHE_Putative_tubulin_polyglutamylase_TTLL9_OS=Fasciola_hepatica_OX=6192_GN=D915_007023_PE=4_SV=1	2.07	0.67	1.17	T0+T5+T10	0	0	0	ND.	--	--	--	--	--	--
maker-scaffold10x_1306_pilon-snap-gene-0.15-mRNA-1	no hit	no hit	0.68	0.64	2.53	T0+T5+T10	0	0	0	ND.	--	--	--	--	--	--
maker-scaffold10x_1306_pilon-snap-gene-0.16-mRNA-1	A0A504Y8Z1	A0A504Y8Z1|A0A504Y8Z1_FASGI_Complement_component_1_Q_subcomponent-binding_protein_mitochondrial_OS=Fasciola_gigantica_OX=46835_GN=FGIG_09024_PE=4_SV=1	491.67	519.48	691.7	T0+T5+T10	269.85	372.6	255.77	T0+T5+T10	--	--	--	--	--	--
maker-scaffold10x_1306_pilon-snap-gene-0.17-mRNA-1	A0A4E0RHD7	A0A4E0RHD7|A0A4E0RHD7_FASHE_Small_G_protein_signaling_modulator_1_OS=Fasciola_hepatica_OX=6192_GN=D915_003420_PE=4_SV=1	0.13	0.43	0	T0+T5	0	0	0	ND.	--	--	--	--	--	--
maker-scaffold10x_1306_pilon-snap-gene-0.18-mRNA-1	A0A4E0RDA8	A0A4E0RDA8|A0A4E0RDA8_FASHE_XPO7_(Fragment)_OS=Fasciola_hepatica_OX=6192_GN=D915_003422_PE=4_SV=1	6.43	6.35	9.27	T0+T5+T10	0	0	0	ND.	--	--	--	--	--	--
maker-scaffold10x_1309_pilon-augustus-gene-0.21-mRNA-1	no hit	no hit	0.33	0	0	T0	0	0	0	ND.	--	--	--	--	--	--
maker-scaffold10x_1309_pilon-snap-gene-0.102-mRNA-1	A0A4E0R224	A0A4E0R224|A0A4E0R224_FASHE_Glycerol_kinase_OS=Fasciola_hepatica_OX=6192_GN=D915_007889_PE=4_SV=1	71.55	48.85	35.31	T0+T5+T10	0	0	0	ND.	-0.926649	-1.74714	-0.756205	--	--	--
maker-scaffold10x_1309_pilon-snap-gene-0.103-mRNA-1	A0A4E0RN12	A0A4E0RN12|A0A4E0RN12_FASHE_Arginase_OS=Fasciola_hepatica_OX=6192_GN=D915_000092_PE=3_SV=1	5.44	0.47	1.97	T0+T5+T10	0	0	0	ND.	-4.4079	-1.9757	--	--	--	--
maker-scaffold10x_1309_pilon-snap-gene-0.104-mRNA-1	A0A4E0RM06	A0A4E0RM06|A0A4E0RM06_FASHE_Pre-rRNA_processing_protein_FTSJ3_OS=Fasciola_hepatica_OX=6192_GN=D915_000094_PE=3_SV=1	3.47	4.21	6.32	T0+T5+T10	0	0	0	ND.	--	--	--	--	--	--
maker-scaffold10x_1309_pilon-snap-gene-0.84-mRNA-1	A0A4E0RUY2	A0A4E0RUY2|A0A4E0RUY2_FASHE_Putative_Guanine-nucleotide-exchange-factor_OS=Fasciola_hepatica_OX=6192_GN=D915_004450_PE=4_SV=1	3.19	2.31	4.86	T0+T5+T10	0	0	0	ND.	-0.956318	--	--	--	--	--
maker-scaffold10x_1309_pilon-snap-gene-0.85-mRNA-1	A0A4E0RTP7	A0A4E0RTP7|A0A4E0RTP7_FASHE_Mitogen-activated_protein_kinase_OS=Fasciola_hepatica_OX=6192_GN=D915_005042_PE=4_SV=1	18.04	12.53	18.63	T0+T5+T10	0	0	0	ND.	-0.912488	-0.642065	--	--	--	--
maker-scaffold10x_1309_pilon-snap-gene-0.86-mRNA-1	A0A504YHS4	A0A504YHS4|A0A504YHS4_FASGI_Peptide_alpha-N-acetyltransferase_OS=Fasciola_gigantica_OX=46835_GN=FGIG_07199_PE=4_SV=1	71.17	103.48	190.57	T0+T5+T10	0	0	0	ND.	--	0.550948	--	--	--	--
maker-scaffold10x_1309_pilon-snap-gene-0.87-mRNA-1	A0A4E0RB89	A0A4E0RB89|A0A4E0RB89_FASHE_Pyroglutamyl-peptidase_I_OS=Fasciola_hepatica_OX=6192_GN=D915_004784_PE=4_SV=1	104.55	91.09	105.34	T0+T5+T10	0	0	0	ND.	-0.671841	-0.740044	--	--	--	--
maker-scaffold10x_1309_pilon-snap-gene-0.88-mRNA-1	A0A4E0RKT8	A0A4E0RKT8|A0A4E0RKT8_FASHE_GPI_transamidase_component_PIG-T_OS=Fasciola_hepatica_OX=6192_GN=D915_000095_PE=4_SV=1	21	32.21	36.36	T0+T5+T10	0	0	0	ND.	--	--	--	--	--	--
maker-scaffold10x_1309_pilon-snap-gene-0.89-mRNA-1	A0A4Z2DIA8	A0A4Z2DIA8|A0A4Z2DIA8_SCHJA_GPI_transamidase_component_PIG-T_OS=Schistosoma_japonicum_OX=6182_GN=EWB00_000637_PE=4_SV=1	0.53	0.8	1.51	T0+T5+T10	0	0	0	ND.	--	--	--	--	--	--
maker-scaffold10x_1309_pilon-snap-gene-0.91-mRNA-1	no hit	no hit	8.19	15.18	12.49	T0+T5+T10	0	0	0	ND.	--	--	--	--	--	--
maker-scaffold10x_1309_pilon-snap-gene-0.92-mRNA-1	A0A4E0R0Z1	A0A4E0R0Z1|A0A4E0R0Z1_FASHE_Diphthamide_biosynthesis_protein_2_OS=Fasciola_hepatica_OX=6192_GN=D915_009644_PE=3_SV=1	25.79	14.4	21.45	T0+T5+T10	0	0	0	ND.	-1.04006	-0.969321	--	--	--	--
maker-scaffold10x_1309_pilon-snap-gene-0.95-mRNA-1	A0A4E0RSN9	A0A4E0RSN9|A0A4E0RSN9_FASHE_Ancient_ubiquitous_protein_1_OS=Fasciola_hepatica_OX=6192_GN=D915_005043_PE=4_SV=1	51.82	85.18	119.83	T0+T5+T10	0	0	0	ND.	--	0.579068	--	--	--	--
maker-scaffold10x_1309_pilon-snap-gene-0.96-mRNA-1	A0A4E0S284	A0A4E0S284|A0A4E0S284_FASHE_Dolichyldiphosphatase_OS=Fasciola_hepatica_OX=6192_GN=D915_003377_PE=4_SV=1	9.71	20.18	29.93	T0+T5+T10	0	0	0	ND.	--	0.757754	--	--	--	--
maker-scaffold10x_1309_pilon-snap-gene-0.97-mRNA-1	A0A4E0RAV3	A0A4E0RAV3|A0A4E0RAV3_FASHE_Cyclic_AMP_dependent_transcription_factor_ATF_6_OS=Fasciola_hepatica_OX=6192_GN=D915_003376_PE=4_SV=1	31.56	34.68	33.77	T0+T5+T10	0	0	0	ND.	--	--	--	--	--	--
maker-scaffold10x_1309_pilon-snap-gene-0.98-mRNA-1	A0A504YCW6	A0A504YCW6|A0A504YCW6_FASGI_Coatomer_subunit_zeta_OS=Fasciola_gigantica_OX=46835_GN=FGIG_01689_PE=3_SV=1	111.27	166.06	258.14	T0+T5+T10	510.49	687.07	526.86	T0+T5+T10	--	0.441737	--	--	--	--
maker-scaffold10x_1310_pilon-augustus-gene-0.11-mRNA-1	no hit	no hit	99.72	263.25	469.78	T0+T5+T10	0	0	0	ND.	0.993033	1.47027	0.546198	--	--	--
maker-scaffold10x_1310_pilon-snap-gene-0.1-mRNA-1	H2KUQ1	H2KUQ1|H2KUQ1_CLOSI_FAM203_family_protein_GA19338_OS=Clonorchis_sinensis_OX=79923_GN=CLF_109826_PE=4_SV=1	16.62	37.08	46.38	T0+T5+T10	0	0	0	ND.	0.955498	0.999652	--	--	--	--
maker-scaffold10x_1310_pilon-snap-gene-0.2-mRNA-1	no hit	no hit	0.08	0	0.02	T0+T10	0	0	0	ND.	--	--	--	--	--	--
maker-scaffold10x_1315_pilon-snap-gene-0.7-mRNA-1	A0A504YEF2	A0A504YEF2|A0A504YEF2_FASGI_DnaJ_subfamily_A_member_5_OS=Fasciola_gigantica_OX=46835_GN=FGIG_05428_PE=4_SV=1	11.71	21.23	25.03	T0+T5+T10	0	0	0	ND.	--	--	--	--	--	--
maker-scaffold10x_1315_pilon-snap-gene-0.8-mRNA-1	no hit	no hit	10.9	11.57	17.96	T0+T5+T10	0	0	0	ND.	--	--	--	--	--	--
maker-scaffold10x_1318_pilon-augustus-gene-0.15-mRNA-1	A0A4E0S187	A0A4E0S187|A0A4E0S187_FASHE_Protein_SCAI_OS=Fasciola_hepatica_OX=6192_GN=D915_002863_PE=4_SV=1	23.15	34.82	35.98	T0+T5+T10	0	0	0	ND.	--	--	--	--	--	--
maker-scaffold10x_1318_pilon-pred_gff_StringTie-gene-0.50-mRNA-1	no hit	no hit	0.26	0	0.81	T0+T10	0	0	0	ND.	--	--	--	--	--	--
maker-scaffold10x_1318_pilon-pred_gff_StringTie-gene-0.63-mRNA-1	no hit	no hit	0.38	0.36	0.72	T0+T5+T10	0	0	0	ND.	--	--	--	--	--	--
maker-scaffold10x_1318_pilon-snap-gene-0.0-mRNA-1	A0A4E0RAA4	A0A4E0RAA4|A0A4E0RAA4_FASHE_Tetratricopeptide_repeat_protein_25_OS=Fasciola_hepatica_OX=6192_GN=D915_004508_PE=4_SV=1	26.67	19.54	7.74	T0+T5+T10	0	0	0	ND.	--	-2.07532	-1.2661	--	--	--
maker-scaffold10x_1318_pilon-snap-gene-0.2-mRNA-1	A0A4E0S2K5	A0A4E0S2K5|A0A4E0S2K5_FASHE_Iron-dependent_fumarate_hydratase_OS=Fasciola_hepatica_OX=6192_GN=D915_003140_PE=4_SV=1	86.41	85.18	68.94	T0+T5+T10	45.3	69.03	50.7	T0+T5+T10	-0.440009	-1.08774	-0.581395	--	--	--
maker-scaffold10x_1318_pilon-snap-gene-0.3-mRNA-1	A0A4E0RDX1	A0A4E0RDX1|A0A4E0RDX1_FASHE_OTU_domain-containing_protein_5-A_OS=Fasciola_hepatica_OX=6192_GN=D915_004458_PE=4_SV=1	40.99	65.57	62.99	T0+T5+T10	0	0	0	ND.	--	--	--	--	--	--
maker-scaffold10x_1318_pilon-snap-gene-0.4-mRNA-1	A0A4E0R388	A0A4E0R388|A0A4E0R388_FASHE_RNA-binding_protein_26_OS=Fasciola_hepatica_OX=6192_GN=D915_008414_PE=4_SV=1	15.28	20.48	29.11	T0+T5+T10	0	0	0	ND.	--	--	--	--	--	--
maker-scaffold10x_1318_pilon-snap-gene-0.7-mRNA-1	A0A183AFN3	A0A183AFN3|A0A183AFN3_9TREM_Fumerase_C_domain-containing_protein_OS=Echinostoma_caproni_OX=27848_PE=4_SV=1	0	0	0.08	T10	0	0	0	ND.	--	--	--	--	--	--
maker-scaffold10x_1319_pilon-snap-gene-0.1-mRNA-1	A0A4E0RZQ0	A0A4E0RZQ0|A0A4E0RZQ0_FASHE_Protein_tyrosine_phosphatase_n9_OS=Fasciola_hepatica_OX=6192_GN=D915_006298_PE=4_SV=1	9.72	34.12	40.75	T0+T5+T10	0	0	0	ND.	1.43552	1.3155	--	--	--	--
maker-scaffold10x_1322_pilon-snap-gene-0.11-mRNA-1	A0A504Z3K1	A0A504Z3K1|A0A504Z3K1_FASGI_Putative_18S_rRNA_(Guanine-N(7))-methyltransferase_OS=Fasciola_gigantica_OX=46835_GN=FGIG_10794_PE=4_SV=1	20.46	18.12	25.02	T0+T5+T10	0	0	0	ND.	--	-0.487234	--	--	--	--
maker-scaffold10x_1322_pilon-snap-gene-0.12-mRNA-1	no hit	no hit	0.53	2.36	1.5	T0+T5+T10	0	0	0	ND.	--	--	--	--	--	--
maker-scaffold10x_1322_pilon-snap-gene-0.9-mRNA-1	no hit	no hit	3.59	5.26	4.98	T0+T5+T10	0	0	0	ND.	--	--	--	--	--	--
maker-scaffold10x_1323_pilon-augustus-gene-0.9-mRNA-1	A0A4E0RHA9	A0A4E0RHA9|A0A4E0RHA9_FASHE_Anoctamin_OS=Fasciola_hepatica_OX=6192_GN=D915_002627_PE=3_SV=1	15.5	24.64	24.15	T0+T5+T10	0	0	0	ND.	--	--	--	--	--	--
maker-scaffold10x_1323_pilon-snap-gene-0.5-mRNA-1	A0A4E0RKX6	A0A4E0RKX6|A0A4E0RKX6_FASHE_ATP-dependent_DNA_helicase_2_subunit_2_OS=Fasciola_hepatica_OX=6192_GN=D915_002626_PE=4_SV=1	0.07	0.25	0.06	T0+T5+T10	0	0	0	ND.	--	--	--	--	--	--
maker-scaffold10x_1326_pilon-augustus-gene-0.74-mRNA-1	A0A4E0RBB5	A0A4E0RBB5|A0A4E0RBB5_FASHE_DUF676_domain-containing_protein_OS=Fasciola_hepatica_OX=6192_GN=D915_005879_PE=4_SV=1	1.57	1.7	1.11	T0+T5+T10	0	0	0	ND.	--	--	--	--	--	--
maker-scaffold10x_1326_pilon-snap-gene-0.49-mRNA-1	A0A4E0S224	A0A4E0S224|A0A4E0S224_FASHE_Clusterin-associated_protein_1_OS=Fasciola_hepatica_OX=6192_GN=D915_003809_PE=4_SV=1	0.34	0	0.58	T0+T10	0	0	0	ND.	--	--	--	--	--	--
maker-scaffold10x_1326_pilon-snap-gene-0.52-mRNA-1	A0A4E0RBB5	A0A4E0RBB5|A0A4E0RBB5_FASHE_DUF676_domain-containing_protein_OS=Fasciola_hepatica_OX=6192_GN=D915_005879_PE=4_SV=1	0	0	0.27	T10	0	0	0	ND.	--	--	--	--	--	--
maker-scaffold10x_1326_pilon-snap-gene-0.53-mRNA-1	A0A4E0RXZ6	A0A4E0RXZ6|A0A4E0RXZ6_FASHE_Calcyphosine_OS=Fasciola_hepatica_OX=6192_GN=D915_005880_PE=4_SV=1	12.54	7.13	4.96	T0+T5+T10	0	0	0	ND.	--	-1.70566	--	--	--	--
maker-scaffold10x_1326_pilon-snap-gene-0.55-mRNA-1	A0A4E0RUF3	A0A4E0RUF3|A0A4E0RUF3_FASHE_Mitochondrial_calcium_uniporter_OS=Fasciola_hepatica_OX=6192_GN=D915_003807_PE=4_SV=1	0.43	0	0	T0	0	0	0	ND.	--	--	--	--	--	--
maker-scaffold10x_1326_pilon-snap-gene-0.58-mRNA-1	A0A4E0RT94	A0A4E0RT94|A0A4E0RT94_FASHE_Ensconsin_(Microtubule-associated_protein_7)_OS=Fasciola_hepatica_OX=6192_GN=D915_004388_PE=4_SV=1	28.9	52.99	32.87	T0+T5+T10	0	0	0	ND.	--	--	-0.585882	--	--	--
maker-scaffold10x_1326_pilon-snap-gene-0.59-mRNA-1	A0A4E0RBB5	A0A4E0RBB5|A0A4E0RBB5_FASHE_DUF676_domain-containing_protein_OS=Fasciola_hepatica_OX=6192_GN=D915_005879_PE=4_SV=1	4.94	7.82	8.53	T0+T5+T10	0	0	0	ND.	--	--	--	--	--	--
maker-scaffold10x_1326_pilon-snap-gene-0.61-mRNA-1	A0A4E0S314	A0A4E0S314|A0A4E0S314_FASHE_3-hydroxy-3-methylglutaryl_coenzyme_A_synthase_OS=Fasciola_hepatica_OX=6192_GN=D915_000932_PE=3_SV=1	40.59	44.39	70.52	T0+T5+T10	0	0	0	ND.	--	--	--	--	--	--
maker-scaffold10x_1326_pilon-snap-gene-0.62-mRNA-1	A0A4E0REZ7	A0A4E0REZ7|A0A4E0REZ7_FASHE_Cytoplasmic_tRNA_2-thiolation_protein_2_OS=Fasciola_hepatica_OX=6192_GN=D915_008991_PE=3_SV=1	0.12	0.13	0.11	T0+T5+T10	0	0	0	ND.	--	--	--	--	--	--
maker-scaffold10x_1327_pilon-snap-gene-0.19-mRNA-1	A0A4E0S0J8	A0A4E0S0J8|A0A4E0S0J8_FASHE_Telomerase_reverse_transcriptase_OS=Fasciola_hepatica_OX=6192_GN=D915_005322_PE=3_SV=1	8.28	15.03	31.64	T0+T5+T10	0	0	0	ND.	--	1.41687	0.788695	--	--	--
maker-scaffold10x_1327_pilon-snap-gene-0.21-mRNA-1	A0A4E0RC22	A0A4E0RC22|A0A4E0RC22_FASHE_28S_ribosomal_protein_S30_mitochondrial_OS=Fasciola_hepatica_OX=6192_GN=D915_005412_PE=4_SV=1	8.59	10.08	11.31	T0+T5+T10	0	0	0	ND.	--	--	--	--	--	--
maker-scaffold10x_1329_pilon-snap-gene-0.2-mRNA-1	A0A4E0S1J9	A0A4E0S1J9|A0A4E0S1J9_FASHE_tRNA-nucleotidyltransferase_OS=Fasciola_hepatica_OX=6192_GN=D915_004462_PE=3_SV=1	14.54	7.28	8	T0+T5+T10	0	0	0	ND.	-1.42732	-1.16792	--	--	--	--
maker-scaffold10x_1331_pilon-snap-gene-0.10-mRNA-1	A0A2H1C3U3	A0A2H1C3U3|A0A2H1C3U3_FASHE_RNA_polymerase_Rpb5_domain_protein_OS=Fasciola_hepatica_OX=6192_GN=D915_006927_PE=3_SV=1	37.1	28.23	66.42	T0+T5+T10	0	0	0	ND.	--	--	--	--	--	--
maker-scaffold10x_1331_pilon-snap-gene-0.11-mRNA-1	A0A4E0RF02	A0A4E0RF02|A0A4E0RF02_FASHE_Developmentally-regulated_GTP-binding_protein_2_OS=Fasciola_hepatica_OX=6192_GN=D915_002820_PE=4_SV=1	0.46	0.71	1.18	T0+T5+T10	0	0	0	ND.	--	--	--	--	--	--
maker-scaffold10x_1331_pilon-snap-gene-0.12-mRNA-1	A0A4E0RGN7	A0A4E0RGN7|A0A4E0RGN7_FASHE_GRB2_adaptor_protein_a_OS=Fasciola_hepatica_OX=6192_GN=D915_002819_PE=4_SV=1	101.24	105.37	86.51	T0+T5+T10	0	0	0	ND.	-0.492802	-0.927079	--	--	--	--
maker-scaffold10x_1331_pilon-snap-gene-0.13-mRNA-1	A0A4E0RPV9	A0A4E0RPV9|A0A4E0RPV9_FASHE_Putative_malate_dehydrogenase_1B_OS=Fasciola_hepatica_OX=6192_GN=D915_001422_PE=4_SV=1	14.72	26.95	57.33	T0+T5+T10	0	0	0	ND.	0.565297	1.10021	--	--	--	--
maker-scaffold10x_1331_pilon-snap-gene-0.15-mRNA-1	A0A4E0R4K7	A0A4E0R4K7|A0A4E0R4K7_FASHE_U2_small_nuclear_RNA_auxiliary_factor_1_OS=Fasciola_hepatica_OX=6192_GN=D915_006926_PE=4_SV=1	107.6	174.03	299.38	T0+T5+T10	0	0	0	ND.	--	0.541463	--	--	--	--
maker-scaffold10x_1331_pilon-snap-gene-0.16-mRNA-1	A0A4E0R0H5	A0A4E0R0H5|A0A4E0R0H5_FASHE_Zinc_finger_MYND_domain-containing_protein_15_OS=Fasciola_hepatica_OX=6192_GN=D915_009260_PE=4_SV=1	14.59	16.14	13.92	T0+T5+T10	0	0	0	ND.	--	--	--	--	--	--
maker-scaffold10x_1331_pilon-snap-gene-0.17-mRNA-1	A0A5J4NMV3	A0A5J4NMV3|A0A5J4NMV3_9TREM_Protein_kinase_A_OS=Paragonimus_westermani_OX=34504_GN=DEA37_0002990_PE=3_SV=1	191.37	184.67	143.54	T0+T5+T10	0	0	0	ND.	-0.395479	-0.934577	--	--	--	--
maker-scaffold10x_1332_pilon-augustus-gene-0.15-mRNA-1	A0A4W5MT35	A0A4W5MT35|A0A4W5MT35_9TELE_Coiled-coil_domain_containing_113_OS=Hucho_hucho_OX=62062_PE=4_SV=1	1.13	0	0.26	T0+T10	0	0	0	ND.	--	--	--	--	--	--
maker-scaffold10x_1332_pilon-augustus-gene-0.19-mRNA-1	A0A4E0RAI7	A0A4E0RAI7|A0A4E0RAI7_FASHE_GTP:AMP_phosphotransferase_mitochondrial_OS=Fasciola_hepatica_OX=6192_GN=D915_003511_PE=3_SV=1	184.25	192.79	174.35	T0+T5+T10	0	0	0	ND.	--	-0.736445	--	--	--	--
maker-scaffold10x_1332_pilon-augustus-gene-0.23-mRNA-1	A0A4E0R9X7	A0A4E0R9X7|A0A4E0R9X7_FASHE_WD_repeat-containing_protein_78_OS=Fasciola_hepatica_OX=6192_GN=D915_005125_PE=4_SV=1	0	0.04	0	T5	0	0	0	ND.	--	--	--	--	--	--
maker-scaffold10x_1332_pilon-pred_gff_StringTie-gene-0.67-mRNA-1	A0A4E0S165	A0A4E0S165|A0A4E0S165_FASHE_GTP-binding_protein_Di-Ras2_OS=Fasciola_hepatica_OX=6192_GN=D915_003178_PE=4_SV=1	0.4	0.6	1.1	T0+T5+T10	0	0	0	ND.	--	--	--	--	--	--
maker-scaffold10x_1332_pilon-pred_gff_StringTie-gene-0.69-mRNA-1	A0A4E0RTF3	A0A4E0RTF3|A0A4E0RTF3_FASHE_Protein_boule_OS=Fasciola_hepatica_OX=6192_GN=D915_005126_PE=4_SV=1	34.81	21.59	19	T0+T5+T10	0	0	0	ND.	-1.03615	-1.76268	--	--	--	--
maker-scaffold10x_1332_pilon-snap-gene-0.35-mRNA-1	A0A075A3Z8	A0A075A3Z8|A0A075A3Z8_9TREM_PITH_domain-containing_protein_OS=Opisthorchis_viverrini_OX=6198_GN=T265_00258_PE=4_SV=1	13.06	20.37	31.3	T0+T5+T10	0	0	0	ND.	--	0.52115	--	--	--	--
maker-scaffold10x_1332_pilon-snap-gene-0.37-mRNA-1	A0A4E0RB92	A0A4E0RB92|A0A4E0RB92_FASHE_E3_ubiquitin-protein_ligase_MARCH6_OS=Fasciola_hepatica_OX=6192_GN=D915_010081_PE=4_SV=1	0.57	1.04	0.78	T0+T5+T10	0	0	0	ND.	--	--	--	--	--	--
maker-scaffold10x_1332_pilon-snap-gene-0.40-mRNA-1	A0A4E0R5Z7	A0A4E0R5Z7|A0A4E0R5Z7_FASHE_Spermatogenesis-associated_protein_6_OS=Fasciola_hepatica_OX=6192_GN=D915_004723_PE=4_SV=1	1.22	0.8	0.26	T0+T5+T10	0	0	0	ND.	--	--	--	--	--	--
maker-scaffold10x_1332_pilon-snap-gene-0.41-mRNA-1	A0A2H1CKH7	A0A2H1CKH7|A0A2H1CKH7_FASHE_DNA_repair_helicase_rad25_OS=Fasciola_hepatica_OX=6192_GN=D915_003177_PE=4_SV=1	3.37	4.76	6.18	T0+T5+T10	0	0	0	ND.	--	--	--	--	--	--
maker-scaffold10x_1332_pilon-snap-gene-0.43-mRNA-1	A0A4E0R595	A0A4E0R595|A0A4E0R595_FASHE_Putative_sister_chromatid_cohesion_complex_cohesin_subunit_OS=Fasciola_hepatica_OX=6192_GN=D915_006835_PE=4_SV=1	34.19	79.66	101.52	T0+T5+T10	0	0	0	ND.	0.771392	0.934474	--	--	--	--
maker-scaffold10x_1332_pilon-snap-gene-0.45-mRNA-1	no hit	no hit	10.24	17.78	18.28	T0+T5+T10	0	0	0	ND.	--	--	--	--	--	--
maker-scaffold10x_1332_pilon-snap-gene-0.46-mRNA-1	A0A4E0RUJ8	A0A4E0RUJ8|A0A4E0RUJ8_FASHE_Striated_muscle_preferentially_expressed_protein_kinase_OS=Fasciola_hepatica_OX=6192_GN=D915_003510_PE=4_SV=1	0	0.22	0.15	T5+T10	0	0	0	ND.	--	--	--	--	--	--
maker-scaffold10x_1332_pilon-snap-gene-0.50-mRNA-1	no hit	no hit	0.42	0.3	0.94	T0+T5+T10	0	0	0	ND.	--	--	--	--	--	--
maker-scaffold10x_1332_pilon-snap-gene-0.51-mRNA-1	no hit	no hit	29.3	38.14	29.77	T0+T5+T10	0	0	0	ND.	--	--	--	--	--	--
maker-scaffold10x_1335_pilon-augustus-gene-0.50-mRNA-1	A0A183AC91	A0A183AC91|A0A183AC91_9TREM_WD_REPEATS_REGION_domain-containing_protein_OS=Echinostoma_caproni_OX=27848_GN=ECPE_LOCUS4576_PE=4_SV=1	62.73	72.9	61.5	T0+T5+T10	0	0	0	ND.	--	-0.584204	--	--	--	--
maker-scaffold10x_1335_pilon-augustus-gene-0.51-mRNA-1	A0A4E0RM08	A0A4E0RM08|A0A4E0RM08_FASHE_FYVE-type_domain-containing_protein_OS=Fasciola_hepatica_OX=6192_GN=D915_006768_PE=4_SV=1	1.43	2.33	2.61	T0+T5+T10	0	0	0	ND.	--	--	--	--	--	--
maker-scaffold10x_1335_pilon-snap-gene-0.59-mRNA-1	A0A504Z8N3	A0A504Z8N3|A0A504Z8N3_FASGI_Putative_histone-lysine_N-methyltransferase_CG1716_OS=Fasciola_gigantica_OX=46835_GN=FGIG_09253_PE=4_SV=1	7.24	14.15	13.95	T0+T5+T10	0	0	0	ND.	--	--	--	--	--	--
maker-scaffold10x_1335_pilon-snap-gene-0.60-mRNA-1	no hit	no hit	4.03	5.16	8.11	T0+T5+T10	0	0	0	ND.	--	--	--	--	--	--
maker-scaffold10x_1335_pilon-snap-gene-0.63-mRNA-1	A0A4E0R8G7	A0A4E0R8G7|A0A4E0R8G7_FASHE_Protein_TFG_OS=Fasciola_hepatica_OX=6192_GN=D915_011055_PE=4_SV=1	24.11	53.33	42.23	T0+T5+T10	0	54.29	0	T5	0.694819	--	--	--	--	-4.02692
maker-scaffold10x_1335_pilon-snap-gene-0.65-mRNA-1	A0A2H1CPC6	A0A2H1CPC6|A0A2H1CPC6_FASHE_DnaJ_domain_protein_OS=Fasciola_hepatica_OX=6192_GN=D915_002075_PE=4_SV=1	0.32	0.3	0	T0+T5	0	0	0	ND.	--	--	--	--	--	--
maker-scaffold10x_1335_pilon-snap-gene-0.66-mRNA-1	A0A4E0RI76	A0A4E0RI76|A0A4E0RI76_FASHE_Polo_kinase_1_OS=Fasciola_hepatica_OX=6192_GN=D915_002076_PE=4_SV=1	0.18	0	0.18	T0+T10	0	0	0	ND.	--	--	--	--	--	--
maker-scaffold10x_1335_pilon-snap-gene-0.67-mRNA-1	B0RZ78	B0RZ78|B0RZ78_FASHE_Tubulin_beta_chain_OS=Fasciola_hepatica_OX=6192_GN=beta-tub3_PE=2_SV=1	1.19	14.3	37.27	T0+T5+T10	0	0	0	ND.	--	3.76906	--	--	--	--
maker-scaffold10x_1335_pilon-snap-gene-0.68-mRNA-1	A0A504Z4M3	A0A504Z4M3|A0A504Z4M3_FASGI_Embryonic_stem_cell-specific_5-hydroxymethylcytosine-binding_protein_OS=Fasciola_gigantica_OX=46835_GN=FGIG_02994_PE=4_SV=1	0.14	0	0	T0	0	0	0	ND.	--	--	--	--	--	--
maker-scaffold10x_1335_pilon-snap-gene-0.70-mRNA-1	B0RZ78	B0RZ78|B0RZ78_FASHE_Tubulin_beta_chain_OS=Fasciola_hepatica_OX=6192_GN=beta-tub3_PE=2_SV=1	113.87	403.38	909.23	T0+T5+T10	0	0	0	ND.	1.57383	2.22594	0.719022	--	--	--
maker-scaffold10x_1335_pilon-snap-gene-0.71-mRNA-1	A0A504ZCJ3	A0A504ZCJ3|A0A504ZCJ3_FASGI_Lipopolysaccharide_choline_phosphotransferase_protein_OS=Fasciola_gigantica_OX=46835_GN=FGIG_09123_PE=4_SV=1	0	0	0.27	T10	0	0	0	ND.	--	--	--	--	--	--
maker-scaffold10x_1335_pilon-snap-gene-0.72-mRNA-1	A0A4E0QY39	A0A4E0QY39|A0A4E0QY39_FASHE_RRM_domain-containing_protein_OS=Fasciola_hepatica_OX=6192_GN=D915_008720_PE=4_SV=1	33.57	41.32	56.03	T0+T5+T10	0	0	0	ND.	--	--	--	--	--	--
maker-scaffold10x_1335_pilon-snap-gene-0.73-mRNA-1	A0A3Q0KRP9	A0A3Q0KRP9|A0A3Q0KRP9_SCHMA_Ank_repeat-containing,_putative_OS=Schistosoma_mansoni_OX=6183_PE=4_SV=1	17.31	21.88	21.43	T0+T5+T10	0	0	0	ND.	--	--	--	--	--	--
maker-scaffold10x_1339_pilon-snap-gene-0.38-mRNA-1	A0A4E0R8I8	A0A4E0R8I8|A0A4E0R8I8_FASHE_Palmitoyltransferase_OS=Fasciola_hepatica_OX=6192_GN=D915_005887_PE=3_SV=1	39.83	31.04	27.67	T0+T5+T10	0	0	0	ND.	-0.822379	-1.24202	--	--	--	--
maker-scaffold10x_1339_pilon-snap-gene-0.39-mRNA-1	A0A504Z0N7	A0A504Z0N7|A0A504Z0N7_FASGI_Palmitoyltransferase_OS=Fasciola_gigantica_OX=46835_GN=FGIG_00077_PE=4_SV=1	1.84	2.88	2.22	T0+T5+T10	0	0	0	ND.	--	--	--	--	--	--
maker-scaffold10x_1339_pilon-snap-gene-0.41-mRNA-1	A0A4Z2DDK9	A0A4Z2DDK9|A0A4Z2DDK9_SCHJA_Cadherin-related_tumor_suppressor_isoform_4_OS=Schistosoma_japonicum_OX=6182_GN=EWB00_002060_PE=4_SV=1	0.13	0	0	T0	0	0	0	ND.	--	--	--	--	--	--
maker-scaffold10x_1339_pilon-snap-gene-0.43-mRNA-1	A0A4E0RFR2	A0A4E0RFR2|A0A4E0RFR2_FASHE_Oxysterol-binding_protein_OS=Fasciola_hepatica_OX=6192_GN=D915_009264_PE=3_SV=1	71.4	62.26	50.47	T0+T5+T10	0	0	0	ND.	-0.633559	-1.18961	--	--	--	--
maker-scaffold10x_1339_pilon-snap-gene-0.44-mRNA-1	A0A4E0RW93	A0A4E0RW93|A0A4E0RW93_FASHE_Arginine_glutamic_acid_dipeptide_RE_repeat_OS=Fasciola_hepatica_OX=6192_GN=D915_003495_PE=4_SV=1	1.82	5.03	4.78	T0+T5+T10	0	0	0	ND.	1.10849	1.0009	--	--	--	--
maker-scaffold10x_134_pilon-snap-gene-0.5-mRNA-1	A0A4E0R949	A0A4E0R949|A0A4E0R949_FASHE_Vasa_DEAD-box_RNA_helicase_OS=Fasciola_hepatica_OX=6192_GN=D915_006373_PE=3_SV=1	38.89	92.12	115.48	T0+T5+T10	0	0	0	ND.	0.880341	0.800612	--	--	--	--
maker-scaffold10x_134_pilon-snap-gene-0.6-mRNA-1	A0A4E0R4N5	A0A4E0R4N5|A0A4E0R4N5_FASHE_Transcription_initiation_factor_TFIID_subunit_9_OS=Fasciola_hepatica_OX=6192_GN=D915_006372_PE=4_SV=1	27.12	55.44	85.24	T0+T5+T10	0	0	0	ND.	--	1.11029	--	--	--	--
maker-scaffold10x_134_pilon-snap-gene-0.7-mRNA-1	A0A504YY40	A0A504YY40|A0A504YY40_FASGI_WD_repeat-containing_protein_74_OS=Fasciola_gigantica_OX=46835_GN=FGIG_11503_PE=4_SV=1	17.27	51.79	69.46	T0+T5+T10	0	0	0	ND.	1.19766	1.33358	--	--	--	--
maker-scaffold10x_1340_pilon-augustus-gene-0.23-mRNA-1	A0A4E0RTX9	A0A4E0RTX9|A0A4E0RTX9_FASHE_Tetraspanin-1_OS=Fasciola_hepatica_OX=6192_GN=D915_004124_PE=3_SV=1	417.46	350.34	336.05	T0+T5+T10	0	186.62	261.62	T5+T10	-0.702975	-1.02369	--	--	--	1.32253
maker-scaffold10x_1340_pilon-snap-gene-0.16-mRNA-1	A0A504YUE6	A0A504YUE6|A0A504YUE6_FASGI_IlvB_(Bacterial_acetolactate_synthase)_OS=Fasciola_gigantica_OX=46835_GN=FGIG_01149_PE=3_SV=1	4.75	5.64	7.41	T0+T5+T10	0	0	0	ND.	--	--	--	--	--	--
maker-scaffold10x_1340_pilon-snap-gene-0.17-mRNA-1	A0A4E0RU34	A0A4E0RU34|A0A4E0RU34_FASHE_Cyclin-Y_OS=Fasciola_hepatica_OX=6192_GN=D915_004173_PE=3_SV=1	77.99	62.01	47.51	T0+T5+T10	0	0	0	ND.	-0.644054	-1.31068	--	--	--	--
maker-scaffold10x_1340_pilon-snap-gene-0.19-mRNA-1	A0A2H1CG25	A0A2H1CG25|A0A2H1CG25_FASHE_Mago_binding_protein_OS=Fasciola_hepatica_OX=6192_GN=D915_004174_PE=4_SV=1	6.64	9.2	9.55	T0+T5+T10	0	0	0	ND.	--	--	--	--	--	--
maker-scaffold10x_1343_pilon-snap-gene-0.10-mRNA-1	A0A4E0R5P4	A0A4E0R5P4|A0A4E0R5P4_FASHE_Putative_xp-G/rad2_DNA_repair_endonuclease_family_OS=Fasciola_hepatica_OX=6192_GN=D915_006078_PE=4_SV=1	1.81	3.26	3.87	T0+T5+T10	0	0	0	ND.	--	--	--	--	--	--
maker-scaffold10x_1343_pilon-snap-gene-0.9-mRNA-1	A0A4E0RA26	A0A4E0RA26|A0A4E0RA26_FASHE_C-mannosyltransferase_dpy-19_OS=Fasciola_hepatica_OX=6192_GN=D915_006079_PE=4_SV=1	0.64	0.47	1.27	T0+T5+T10	0	0	0	ND.	--	--	--	--	--	--
maker-scaffold10x_1347_pilon-snap-gene-0.13-mRNA-1	A0A504YLC5	A0A504YLC5|A0A504YLC5_FASGI_Protein_kinase_domain-containing_protein_OS=Fasciola_gigantica_OX=46835_GN=FGIG_06634_PE=4_SV=1	0	0	0.21	T10	0	0	0	ND.	--	--	--	--	--	--
maker-scaffold10x_1347_pilon-snap-gene-0.14-mRNA-1	A0A4E0RXP6	A0A4E0RXP6|A0A4E0RXP6_FASHE_Myoferlin_OS=Fasciola_hepatica_OX=6192_GN=D915_000973_PE=4_SV=1	0.95	1.06	0.93	T0+T5+T10	0	0	0	ND.	--	--	--	--	--	--
maker-scaffold10x_1347_pilon-snap-gene-0.16-mRNA-1	A0A4E0R6N0	A0A4E0R6N0|A0A4E0R6N0_FASHE_Activator_of_basal_transcription_1_OS=Fasciola_hepatica_OX=6192_GN=D915_006863_PE=4_SV=1	65.93	118.75	108.69	T0+T5+T10	0	0	0	ND.	--	--	--	--	--	--
maker-scaffold10x_1347_pilon-snap-gene-0.17-mRNA-1	A0A4E0RDW0	A0A4E0RDW0|A0A4E0RDW0_FASHE_LIM_domain_only_protein_3_OS=Fasciola_hepatica_OX=6192_GN=D915_004759_PE=4_SV=1	0	0	0.9	T10	0	0	0	ND.	--	--	--	--	--	--
maker-scaffold10x_1347_pilon-snap-gene-0.18-mRNA-1	no hit	no hit	4.42	5.84	6.42	T0+T5+T10	0	0	0	ND.	--	--	--	--	--	--
maker-scaffold10x_1347_pilon-snap-gene-0.19-mRNA-1	A0A4E0RAR0	A0A4E0RAR0|A0A4E0RAR0_FASHE_SCP_domain-containing_protein_OS=Fasciola_hepatica_OX=6192_GN=D915_010118_PE=4_SV=1	0.72	0	0	T0	0	0	0	ND.	--	--	--	--	--	--
maker-scaffold10x_1347_pilon-snap-gene-0.20-mRNA-1	A0A4E0RJ77	A0A4E0RJ77|A0A4E0RJ77_FASHE_Transcription_factor_NFAt_subunit_NF45_OS=Fasciola_hepatica_OX=6192_GN=D915_000971_PE=4_SV=1	32.41	34.56	69.17	T0+T5+T10	0	0	0	ND.	--	--	0.826511	--	--	--
maker-scaffold10x_1347_pilon-snap-gene-0.21-mRNA-1	no hit	no hit	0.75	0.12	0.16	T0+T5+T10	0	0	0	ND.	--	-2.39268	--	--	--	--
maker-scaffold10x_1349_pilon-snap-gene-0.13-mRNA-1	A0A4E0RJ28	A0A4E0RJ28|A0A4E0RJ28_FASHE_NF-kappa-B_inhibitor-interacting_Ras_protein_2_OS=Fasciola_hepatica_OX=6192_GN=D915_007467_PE=4_SV=1	1.16	0.88	1.11	T0+T5+T10	0	0	0	ND.	--	--	--	--	--	--
maker-scaffold10x_1349_pilon-snap-gene-0.14-mRNA-1	A0A2H1C399	A0A2H1C399|A0A2H1C399_FASHE_WD_domain,_G-beta_repeat_protein_OS=Fasciola_hepatica_OX=6192_GN=D915_11840_PE=4_SV=1	24.1	71.52	108.44	T0+T5+T10	0	0	0	ND.	1.15952	1.48927	--	--	--	--
maker-scaffold10x_1349_pilon-snap-gene-0.15-mRNA-1	A0A2H1C1F2	A0A2H1C1F2|A0A2H1C1F2_FASHE_Synaptophysin_/_synaptoporin_OS=Fasciola_hepatica_OX=6192_GN=D915_11841_PE=4_SV=1	48.81	40.11	30.97	T0+T5+T10	0	0	0	ND.	--	-1.10578	--	--	--	--
maker-scaffold10x_135_pilon-augustus-gene-0.44-mRNA-1	A0A4E0RGF3	A0A4E0RGF3|A0A4E0RGF3_FASHE_Cytochrome_P450_OS=Fasciola_hepatica_OX=6192_GN=D915_002240_PE=3_SV=1	1.34	1.3	1.75	T0+T5+T10	0	0	0	ND.	--	--	--	--	--	--
maker-scaffold10x_135_pilon-snap-gene-0.34-mRNA-1	A0A4E0S2Z1	A0A4E0S2Z1|A0A4E0S2Z1_FASHE_Growth_inhibition_and_differentiation_OS=Fasciola_hepatica_OX=6192_GN=D915_002244_PE=4_SV=1	81.73	87.6	70.45	T0+T5+T10	0	0	0	ND.	--	-0.915034	--	--	--	--
maker-scaffold10x_135_pilon-snap-gene-0.35-mRNA-1	A0A4E0RVS9	A0A4E0RVS9|A0A4E0RVS9_FASHE_Irx_OS=Fasciola_hepatica_OX=6192_GN=D915_002242_PE=4_SV=1	2.3	0.45	0	T0+T5	0	0	0	ND.	--	-7.60463	--	--	--	--
maker-scaffold10x_135_pilon-snap-gene-0.37-mRNA-1	A0A4E0R4L9	A0A4E0R4L9|A0A4E0R4L9_FASHE_Tripartite_motif_containing_protein_2_OS=Fasciola_hepatica_OX=6192_GN=D915_005343_PE=4_SV=1	6.39	27.68	27.72	T0+T5+T10	0	0	0	ND.	1.5623	1.44589	--	--	--	--
maker-scaffold10x_135_pilon-snap-gene-0.38-mRNA-1	A0A4E0RCY3	A0A4E0RCY3|A0A4E0RCY3_FASHE_Ferritin_OS=Fasciola_hepatica_OX=6192_GN=D915_002243_PE=3_SV=1	0.84	1.67	1.58	T0+T5+T10	312.95	249.1	470.37	T0+T5+T10	--	--	--	--	--	1.90749
maker-scaffold10x_135_pilon-snap-gene-0.39-mRNA-1	A0A4E0RXH6	A0A4E0RXH6|A0A4E0RXH6_FASHE_Subfamily_M14A_unassigned_peptidase_OS=Fasciola_hepatica_OX=6192_GN=D915_002241_PE=4_SV=1	0.25	0.43	0	T0+T5	0	0	0	ND.	--	--	--	--	--	--
maker-scaffold10x_135_pilon-snap-gene-0.40-mRNA-1	A0A504YEE6	A0A504YEE6|A0A504YEE6_FASGI_t-SNARE_coiled-coil_homology_domain-containing_protein_OS=Fasciola_gigantica_OX=46835_GN=FGIG_06932_PE=4_SV=1	30.6	17.85	8.76	T0+T5+T10	0	0	0	ND.	-1.31526	-2.21285	--	--	--	--
maker-scaffold10x_1358_pilon-augustus-gene-0.12-mRNA-1	A0A4E0R147	A0A4E0R147|A0A4E0R147_FASHE_Protein_pecanex_(Fragment)_OS=Fasciola_hepatica_OX=6192_GN=D915_009606_PE=4_SV=1	36.81	37.06	20.04	T0+T5+T10	0	0	0	ND.	--	-1.41712	-0.985413	--	--	--
maker-scaffold10x_1358_pilon-augustus-gene-0.13-mRNA-1	A0A4E0RLK4	A0A4E0RLK4|A0A4E0RLK4_FASHE_ATP-dependent_RNA_helicase_dbp-5_OS=Fasciola_hepatica_OX=6192_GN=D915_000740_PE=4_SV=1	11.96	10.12	9.9	T0+T5+T10	0	17.43	0	T5	--	-0.87758	--	--	--	--
maker-scaffold10x_1358_pilon-pred_gff_StringTie-gene-0.22-mRNA-1	no hit	no hit	510.69	729.28	1041.33	T0+T5+T10	0	0	0	ND.	--	--	--	--	--	--
maker-scaffold10x_1358_pilon-snap-gene-0.0-mRNA-1	A0A4E0RAN5	A0A4E0RAN5|A0A4E0RAN5_FASHE_NGFI-A-binding_protein_OS=Fasciola_hepatica_OX=6192_GN=D915_005157_PE=4_SV=1	0	0.82	0	T5	0	0	0	ND.	--	--	--	--	--	--
maker-scaffold10x_1358_pilon-snap-gene-0.1-mRNA-1	A0A504Z4N6	A0A504Z4N6|A0A504Z4N6_FASGI_NGFI-A-binding_protein_OS=Fasciola_gigantica_OX=46835_GN=FGIG_09108_PE=4_SV=1	1.03	44.3	31.26	T0+T5+T10	0	0	0	ND.	4.26983	4.00009	--	--	--	--
maker-scaffold10x_1358_pilon-snap-gene-0.2-mRNA-1	A0A4E0RX75	A0A4E0RX75|A0A4E0RX75_FASHE_RBR-type_E3_ubiquitin_transferase_OS=Fasciola_hepatica_OX=6192_GN=D915_006274_PE=3_SV=1	13.5	16.78	28.82	T0+T5+T10	0	0	0	ND.	--	--	--	--	--	--
maker-scaffold10x_1358_pilon-snap-gene-0.6-mRNA-1	A0A4E0R998	A0A4E0R998|A0A4E0R998_FASHE_Amyloid_beta_A4_protein-binding_family_A_member_2_OS=Fasciola_hepatica_OX=6192_GN=D915_006276_PE=4_SV=1	59.5	57.52	42.85	T0+T5+T10	0	0	0	ND.	-0.455245	-1.08713	--	--	--	--
maker-scaffold10x_1358_pilon-snap-gene-0.7-mRNA-1	no hit	no hit	0.91	1.09	1.32	T0+T5+T10	0	0	0	ND.	--	--	--	--	--	--
maker-scaffold10x_1359_pilon-snap-gene-0.5-mRNA-1	A0A4E0QZV8	A0A4E0QZV8|A0A4E0QZV8_FASHE_Protein_VAC14_OS=Fasciola_hepatica_OX=6192_GN=D915_008090_PE=4_SV=1	2.62	5.45	10.66	T0+T5+T10	0	0	0	ND.	--	1.07511	--	--	--	--
maker-scaffold10x_1359_pilon-snap-gene-0.6-mRNA-1	A0A2H1C055	A0A2H1C055|A0A2H1C055_FASHE_Zinc_finger,_C3HC4_type_OS=Fasciola_hepatica_OX=6192_GN=D915_12329_PE=4_SV=1	1.69	8.38	15.93	T0+T5+T10	0	0	0	ND.	1.79362	2.30051	--	--	--	--
maker-scaffold10x_136_pilon-pred_gff_StringTie-gene-0.12-mRNA-1	A0A3R7FC67	A0A3R7FC67|A0A3R7FC67_CLOSI_LINE-1_retrotransposable_element_ORF2_protein_OS=Clonorchis_sinensis_OX=79923_GN=CSKR_5584s_PE=4_SV=1	0.55	0.54	0.49	T0+T5+T10	0	0	0	ND.	--	--	--	--	--	--
maker-scaffold10x_136_pilon-snap-gene-0.22-mRNA-1	A0A4E0RH49	A0A4E0RH49|A0A4E0RH49_FASHE_Bardet-Biedl_syndrome_4_protein_OS=Fasciola_hepatica_OX=6192_GN=D915_008903_PE=4_SV=1	2.26	1.74	4.18	T0+T5+T10	0	0	0	ND.	--	--	--	--	--	--
maker-scaffold10x_136_pilon-snap-gene-0.23-mRNA-1	A0A4E0R8K5	A0A4E0R8K5|A0A4E0R8K5_FASHE_Activating_molecule_in_BECN1-regulated_autophagy_protein_1_OS=Fasciola_hepatica_OX=6192_GN=D915_006826_PE=4_SV=1	66.37	95.92	140.96	T0+T5+T10	0	0	0	ND.	--	0.355585	--	--	--	--
maker-scaffold10x_136_pilon-snap-gene-0.24-mRNA-1	A0A504YF43	A0A504YF43|A0A504YF43_FASGI_Serine/threonine-protein_phosphatase_2A_55_kDa_regulatory_subunit_B_(Fragment)_OS=Fasciola_gigantica_OX=46835_GN=FGIG_07178_PE=3_SV=1	7.59	21.8	21.64	T0+T5+T10	0	0	0	ND.	0.992984	--	--	--	--	--
maker-scaffold10x_136_pilon-snap-gene-0.25-mRNA-1	A0A4E0R5U4	A0A4E0R5U4|A0A4E0R5U4_FASHE_Caltractin_OS=Fasciola_hepatica_OX=6192_GN=D915_006827_PE=4_SV=1	53.95	133.63	195.57	T0+T5+T10	0	0	0	ND.	0.923807	1.15029	--	--	--	--
maker-scaffold10x_136_pilon-snap-gene-0.27-mRNA-1	A0A504YH50	A0A504YH50|A0A504YH50_FASGI_Very-long-chain_(3R)-3-hydroxyacyl-CoA_dehydratase_OS=Fasciola_gigantica_OX=46835_GN=FGIG_06755_PE=3_SV=1	8.62	12.48	17.25	T0+T5+T10	0	0	0	ND.	--	--	--	--	--	--
maker-scaffold10x_1361_pilon-pred_gff_StringTie-gene-0.1-mRNA-1	no hit	no hit	0.85	1.12	1.23	T0+T5+T10	0	0	0	ND.	--	--	--	--	--	--
maker-scaffold10x_1362_pilon-snap-gene-0.13-mRNA-1	A0A4E0RXI8	A0A4E0RXI8|A0A4E0RXI8_FASHE_ER_membrane_protein_complex_subunit_1_OS=Fasciola_hepatica_OX=6192_GN=D915_008822_PE=4_SV=1	12.78	22.9	46.42	T0+T5+T10	0	0	0	ND.	--	1.06168	0.625622	--	--	--
maker-scaffold10x_1364_pilon-augustus-gene-0.6-mRNA-1	A0A2H1CB52	A0A2H1CB52|A0A2H1CB52_FASHE_Zn-finger_in_Ran_binding_protein_OS=Fasciola_hepatica_OX=6192_GN=D915_08190_PE=4_SV=1	9.6	35.95	31.62	T0+T5+T10	0	0	0	ND.	1.46502	1.15866	--	--	--	--
maker-scaffold10x_1364_pilon-snap-gene-0.10-mRNA-1	no hit	no hit	139.3	146.73	108.99	T0+T5+T10	0	0	0	ND.	--	-1.10227	--	--	--	--
maker-scaffold10x_1364_pilon-snap-gene-0.12-mRNA-1	A0A4E0R8L3	A0A4E0R8L3|A0A4E0R8L3_FASHE_Glycogen_debranching_enzyme_OS=Fasciola_hepatica_OX=6192_GN=D915_006922_PE=4_SV=1	0.34	0.12	0	T0+T5	0	3.69	0	T5	--	-6.10284	--	--	--	--
maker-scaffold10x_1364_pilon-snap-gene-0.8-mRNA-1	A0A4E0RIB7	A0A4E0RIB7|A0A4E0RIB7_FASHE_Dual_specificity_serine/threonine_tyrosine_kinase_OS=Fasciola_hepatica_OX=6192_GN=D915_008029_PE=4_SV=1	8.25	27.22	42.11	T0+T5+T10	0	0	0	ND.	1.16658	1.50955	--	--	--	--
maker-scaffold10x_1364_pilon-snap-gene-0.9-mRNA-1	A0A4V3SFS3	A0A4V3SFS3|A0A4V3SFS3_OPIFE_RRM_domain-containing_protein_OS=Opisthorchis_felineus_OX=147828_GN=CRM22_003683_PE=4_SV=1	283.58	384.96	619.07	T0+T5+T10	0	42.9	0	T5	--	--	--	--	--	--
maker-scaffold10x_1366_pilon-snap-gene-0.20-mRNA-1	A0A4E0RB70	A0A4E0RB70|A0A4E0RB70_FASHE_Charged_multivesicular_body_protein_2a_OS=Fasciola_hepatica_OX=6192_GN=D915_004510_PE=4_SV=1	160.06	150.99	158.33	T0+T5+T10	0	84.31	0	T5	-0.506324	-0.679181	--	--	--	--
maker-scaffold10x_1366_pilon-snap-gene-0.21-mRNA-1	A0A4E0R3U8	A0A4E0R3U8|A0A4E0R3U8_FASHE_14-3-3_protein_epsilon_OS=Fasciola_hepatica_OX=6192_GN=D915_007669_PE=3_SV=1	83.75	151.29	250.89	T0+T5+T10	1131.88	1665.34	1241.24	T0+T5+T10	0.494594	0.809168	--	--	--	--
maker-scaffold10x_1366_pilon-snap-gene-0.22-mRNA-1	A0A4E0RH90	A0A4E0RH90|A0A4E0RH90_FASHE_LisH_domain-containing_protein_ARMC9_OS=Fasciola_hepatica_OX=6192_GN=D915_002378_PE=4_SV=1	2.62	1.07	1.57	T0+T5+T10	0	0	0	ND.	--	--	--	--	--	--
maker-scaffold10x_1366_pilon-snap-gene-0.23-mRNA-1	A0A4E0RKT7	A0A4E0RKT7|A0A4E0RKT7_FASHE_PHD_finger_and_CXXC_domain-containing_protein_OS=Fasciola_hepatica_OX=6192_GN=D915_002377_PE=4_SV=1	2.2	2.99	5.85	T0+T5+T10	0	0	0	ND.	--	--	--	--	--	--
maker-scaffold10x_1366_pilon-snap-gene-0.24-mRNA-1	A0A4E0R0J0	A0A4E0R0J0|A0A4E0R0J0_FASHE_Protease-associated_domain-containing_protein_1_OS=Fasciola_hepatica_OX=6192_GN=D915_009883_PE=4_SV=1	50.67	42.56	26.8	T0+T5+T10	0	0	0	ND.	--	-1.55152	--	--	--	--
maker-scaffold10x_1366_pilon-snap-gene-0.25-mRNA-1	A0A4E0RY05	A0A4E0RY05|A0A4E0RY05_FASHE_Tryptophanyl-tRNA_synthetase_OS=Fasciola_hepatica_OX=6192_GN=D915_002214_PE=3_SV=1	38.5	48.81	45.29	T0+T5+T10	44.09	29.72	0	T0+T5	--	--	--	--	--	--
maker-scaffold10x_1366_pilon-snap-gene-0.29-mRNA-1	A0A2H1CIT2	A0A2H1CIT2|A0A2H1CIT2_FASHE_DNA_/_pantothenate_metabolism_flavoprotein_(Fragment)_OS=Fasciola_hepatica_OX=6192_GN=D915_05328_PE=4_SV=1	9.97	14.91	19.03	T0+T5+T10	0	0	0	ND.	--	--	--	--	--	--
maker-scaffold10x_1366_pilon-snap-gene-0.30-mRNA-1	A0A4E0RD19	A0A4E0RD19|A0A4E0RD19_FASHE_IQ_motif_and_SEC7_domain-containing_protein_1_OS=Fasciola_hepatica_OX=6192_GN=D915_004509_PE=4_SV=1	3.5	10.47	9.53	T0+T5+T10	0	0	0	ND.	--	--	--	--	--	--
maker-scaffold10x_1366_pilon-snap-gene-0.31-mRNA-1	A0A504Z3X0	A0A504Z3X0|A0A504Z3X0_FASGI_2-methoxy-6-polyprenyl-1,4-benzoquinol_methylase,_mitochondrial_OS=Fasciola_gigantica_OX=46835_GN=FGIG_07449_PE=3_SV=1	509.62	778.58	1126.17	T0+T5+T10	0	0	0	ND.	--	--	--	--	--	--
maker-scaffold10x_1366_pilon-snap-gene-0.32-mRNA-1	A0A4E0RG49	A0A4E0RG49|A0A4E0RG49_FASHE_Topoisomerase_(DNA)_II_binding_protein_1_OS=Fasciola_hepatica_OX=6192_GN=D915_002379_PE=4_SV=1	0.59	6.32	6.48	T0+T5+T10	0	0	0	ND.	2.6016	2.57417	--	--	--	--
maker-scaffold10x_1366_pilon-snap-gene-0.33-mRNA-1	A0A4E0S1I8	A0A4E0S1I8|A0A4E0S1I8_FASHE_Voltage_dependent_calcium_channel_subunit_OS=Fasciola_hepatica_OX=6192_GN=D915_002672_PE=4_SV=1	0	4.3	8.19	T5+T10	0	0	0	ND.	--	--	--	--	--	--
maker-scaffold10x_1366_pilon-snap-gene-0.36-mRNA-1	A0A504YIA1	A0A504YIA1|A0A504YIA1_FASGI_Methylglutaconyl-CoA_hydratase_OS=Fasciola_gigantica_OX=46835_GN=FGIG_04663_PE=3_SV=1	34.04	28.01	31.72	T0+T5+T10	108.98	184.66	109.8	T0+T5+T10	-0.654863	-0.850691	--	--	--	--
maker-scaffold10x_1366_pilon-snap-gene-0.37-mRNA-1	A0A4E0RFY6	A0A4E0RFY6|A0A4E0RFY6_FASHE_Protein_MON2_protein_OS=Fasciola_hepatica_OX=6192_GN=D915_004068_PE=4_SV=1	11.84	22.44	23.67	T0+T5+T10	0	0	0	ND.	--	--	--	--	--	--
maker-scaffold10x_1366_pilon-snap-gene-0.38-mRNA-1	A0A4E0RUQ7	A0A4E0RUQ7|A0A4E0RUQ7_FASHE_Protein_RFT1_homolog_OS=Fasciola_hepatica_OX=6192_GN=D915_003251_PE=3_SV=1	8.61	7.46	6.94	T0+T5+T10	0	0	0	ND.	--	-0.980399	--	--	--	--
maker-scaffold10x_1366_pilon-snap-gene-0.39-mRNA-1	A0A4E0S297	A0A4E0S297|A0A4E0S297_FASHE_E3_SUMO-protein_ligase_RanBP2_OS=Fasciola_hepatica_OX=6192_GN=D915_003253_PE=4_SV=1	35.46	65.92	77.9	T0+T5+T10	0	0	0	ND.	0.479797	0.412857	--	--	--	--
maker-scaffold10x_1368_pilon-snap-gene-0.10-mRNA-1	A0A4E0RZK6	A0A4E0RZK6|A0A4E0RZK6_FASHE_Ribosome_biogenesis_protein_bop1_OS=Fasciola_hepatica_OX=6192_GN=D915_006798_PE=3_SV=1	24.18	35.69	38.26	T0+T5+T10	0	0	0	ND.	--	--	--	--	--	--
maker-scaffold10x_1368_pilon-snap-gene-0.12-mRNA-1	A0A4E0RX10	A0A4E0RX10|A0A4E0RX10_FASHE_Ubiquitin-conjugating_enzyme_E2_OS=Fasciola_hepatica_OX=6192_GN=D915_006800_PE=3_SV=1	7.15	19.46	21.03	T0+T5+T10	0	0	0	ND.	--	--	--	--	--	--
maker-scaffold10x_1368_pilon-snap-gene-0.9-mRNA-1	A0A4E0RFF1	A0A4E0RFF1|A0A4E0RFF1_FASHE_WD40_repeat-containing_protein_SMU1_OS=Fasciola_hepatica_OX=6192_GN=D915_004313_PE=4_SV=1	24.61	45.23	70.73	T0+T5+T10	0	0	0	ND.	--	0.633992	--	--	--	--
maker-scaffold10x_137_pilon-augustus-gene-0.11-mRNA-1	A0A4E0RYM2	A0A4E0RYM2|A0A4E0RYM2_FASHE_Phosphodiesterase_OS=Fasciola_hepatica_OX=6192_GN=D915_000083_PE=3_SV=1	6.16	14.75	15.13	T0+T5+T10	0	0	0	ND.	1.16958	0.760505	--	--	--	--
maker-scaffold10x_137_pilon-augustus-gene-0.4-mRNA-1	A0A2H1CSL2	A0A2H1CSL2|A0A2H1CSL2_FASHE_EGF-like_domain_protein_OS=Fasciola_hepatica_OX=6192_GN=D915_02017_PE=4_SV=1	10.39	11.47	6.39	T0+T5+T10	0	0	0	ND.	--	-1.2238	--	--	--	--
maker-scaffold10x_137_pilon-pred_gff_StringTie-gene-0.62-mRNA-1	A0A4E0RAR7	A0A4E0RAR7|A0A4E0RAR7_FASHE_Cysteine-rich_intestinal_protein_1_OS=Fasciola_hepatica_OX=6192_GN=D915_004578_PE=4_SV=1	11	77.86	104.68	T0+T5+T10	0	0	0	ND.	2.373	2.40646	--	--	--	--
maker-scaffold10x_137_pilon-snap-gene-0.12-mRNA-1	A0A4E0S282	A0A4E0S282|A0A4E0S282_FASHE_Glucosamine-6-phosphate_isomerase_OS=Fasciola_hepatica_OX=6192_GN=D915_003165_PE=3_SV=1	35.14	30.23	22.84	T0+T5+T10	0	0	0	ND.	-0.657534	-1.13148	--	--	--	--
maker-scaffold10x_137_pilon-snap-gene-0.14-mRNA-1	A0A504YAH0	A0A504YAH0|A0A504YAH0_FASGI_Enoyl-CoA_delta_isomerase_2_mitochondrial_OS=Fasciola_gigantica_OX=46835_GN=FGIG_04039_PE=4_SV=1	8.43	14.95	26.55	T0+T5+T10	0	0	0	ND.	--	0.9397	--	--	--	--
maker-scaffold10x_137_pilon-snap-gene-0.15-mRNA-1	A0A504YH46	A0A504YH46|A0A504YH46_FASGI_Acyl_carrier_protein_OS=Fasciola_gigantica_OX=46835_GN=FGIG_04041_PE=3_SV=1	573.68	1074.73	1418.57	T0+T5+T10	126.31	184.84	0	T0+T5	0.519237	--	--	--	--	--
maker-scaffold10x_137_pilon-snap-gene-0.17-mRNA-1	A0A4E0RG75	A0A4E0RG75|A0A4E0RG75_FASHE_Putative_rna_3'_terminal_phosphate_cyclase_OS=Fasciola_hepatica_OX=6192_GN=D915_003166_PE=4_SV=1	2.61	1.67	2.31	T0+T5+T10	0	0	0	ND.	--	--	--	--	--	--
maker-scaffold10x_137_pilon-snap-gene-0.19-mRNA-1	A0A4E0R9F2	A0A4E0R9F2|A0A4E0R9F2_FASHE_Intraflagellar_transport_protein_OS=Fasciola_hepatica_OX=6192_GN=D915_003925_PE=4_SV=1	0.27	0.1	0.22	T0+T5+T10	0	0	0	ND.	--	--	--	--	--	--
maker-scaffold10x_137_pilon-snap-gene-0.20-mRNA-1	A0A4E0RVF1	A0A4E0RVF1|A0A4E0RVF1_FASHE_RNA-binding_protein_Luc7_1_OS=Fasciola_hepatica_OX=6192_GN=D915_003923_PE=4_SV=1	35.73	62.96	70.14	T0+T5+T10	0	0	0	ND.	--	--	--	--	--	--
maker-scaffold10x_137_pilon-snap-gene-0.21-mRNA-1	A0A4E0RZ53	A0A4E0RZ53|A0A4E0RZ53_FASHE_Nipped-B_protein_OS=Fasciola_hepatica_OX=6192_GN=D915_001223_PE=3_SV=1	7.2	9.5	7.97	T0+T5+T10	0	0	0	ND.	--	--	--	--	--	--
maker-scaffold10x_137_pilon-snap-gene-0.22-mRNA-1	A0A4E0REC3	A0A4E0REC3|A0A4E0REC3_FASHE_Small_G_protein_signaling_modulator_3_OS=Fasciola_hepatica_OX=6192_GN=D915_004579_PE=4_SV=1	7.48	17.75	14.86	T0+T5+T10	0	0	0	ND.	--	--	--	--	--	--
maker-scaffold10x_1373_pilon-augustus-gene-0.68-mRNA-1	A0A4E0S2P9	A0A4E0S2P9|A0A4E0S2P9_FASHE_Centrosomal_protein_of_104_kDa_OS=Fasciola_hepatica_OX=6192_GN=D915_001185_PE=4_SV=1	0	0.29	0	T5	0	0	0	ND.	--	--	--	--	--	--
maker-scaffold10x_1373_pilon-augustus-gene-0.79-mRNA-1	A0A4E0RJP9	A0A4E0RJP9|A0A4E0RJP9_FASHE_Putative_cytochrome_oxid_OS=Fasciola_hepatica_OX=6192_GN=D915_000727_PE=3_SV=1	24.31	52.29	74.31	T0+T5+T10	0	0	0	ND.	--	0.726588	--	--	--	--
maker-scaffold10x_1373_pilon-pred_gff_StringTie-gene-0.13-mRNA-1	no hit	no hit	45.27	89.05	106.27	T0+T5+T10	0	0	0	ND.	0.595518	0.568926	--	--	--	--
maker-scaffold10x_1373_pilon-snap-gene-0.84-mRNA-1	A0A504YKV4	A0A504YKV4|A0A504YKV4_FASGI_Elongation_factor_Tu_(Fragment)_OS=Fasciola_gigantica_OX=46835_GN=FGIG_03007_PE=3_SV=1	337.54	420.91	435.66	T0+T5+T10	39.23	151.56	351.76	T0+T5+T10	--	-0.417573	--	--	--	--
maker-scaffold10x_1373_pilon-snap-gene-0.85-mRNA-1	A0A4E0S1Z4	A0A4E0S1Z4|A0A4E0S1Z4_FASHE_Calcium-dependent_secretion_activator_OS=Fasciola_hepatica_OX=6192_GN=D915_004066_PE=4_SV=1	0.03	0.08	0.03	T0+T5+T10	0	0	0	ND.	--	--	--	--	--	--
maker-scaffold10x_1373_pilon-snap-gene-0.86-mRNA-1	A0A4E0RI61	A0A4E0RI61|A0A4E0RI61_FASHE_UBX_domain-containing_protein_6_OS=Fasciola_hepatica_OX=6192_GN=D915_000730_PE=4_SV=1	17.75	22.56	21.15	T0+T5+T10	0	0	0	ND.	--	--	--	--	--	--
maker-scaffold10x_1373_pilon-snap-gene-0.87-mRNA-1	A0A419QDM4	A0A419QDM4|A0A419QDM4_CLOSI_DUF1330_domain-containing_protein_OS=Clonorchis_sinensis_OX=79923_GN=CSKR_11603s_PE=4_SV=1	0.87	0.29	0.34	T0+T5+T10	0	0	0	ND.	--	--	--	--	--	--
maker-scaffold10x_1373_pilon-snap-gene-0.88-mRNA-1	A0A4E0RSR4	A0A4E0RSR4|A0A4E0RSR4_FASHE_Target_of_rapamycin_complex_subunit_lst8_OS=Fasciola_hepatica_OX=6192_GN=D915_009474_PE=4_SV=1	37.96	65.66	92.3	T0+T5+T10	0	0	0	ND.	--	--	--	--	--	--
maker-scaffold10x_1373_pilon-snap-gene-0.90-mRNA-1	A0A4E0RMB3	A0A4E0RMB3|A0A4E0RMB3_FASHE_Voltage_dependent_calcium_channel_OS=Fasciola_hepatica_OX=6192_GN=D915_001184_PE=3_SV=1	0.28	0.11	0.36	T0+T5+T10	0	0	0	ND.	--	--	--	--	--	--
maker-scaffold10x_1373_pilon-snap-gene-0.91-mRNA-1	A0A4E0R8U1	A0A4E0R8U1|A0A4E0R8U1_FASHE_Male-specific_lethal_3_1_OS=Fasciola_hepatica_OX=6192_GN=D915_006512_PE=4_SV=1	39.75	37.14	44.22	T0+T5+T10	0	0	0	ND.	-0.457375	-0.567998	--	--	--	--
maker-scaffold10x_1373_pilon-snap-gene-0.92-mRNA-1	A0A074ZWX9	A0A074ZWX9|A0A074ZWX9_9TREM_OBG-type_G_domain-containing_protein_OS=Opisthorchis_viverrini_OX=6198_GN=T265_05208_PE=4_SV=1	26.1	20.88	31.64	T0+T5+T10	22.72	22.43	0	T0+T5	--	--	--	--	--	--
maker-scaffold10x_1373_pilon-snap-gene-0.93-mRNA-1	A0A4E0RXZ2	A0A4E0RXZ2|A0A4E0RXZ2_FASHE_Glutamate_receptor-interacting_protein_1_OS=Fasciola_hepatica_OX=6192_GN=D915_000729_PE=4_SV=1	0.05	0.79	0.74	T0+T5+T10	0	0	0	ND.	--	--	--	--	--	--
maker-scaffold10x_1373_pilon-snap-gene-0.96-mRNA-1	A0A4E0RSR4	A0A4E0RSR4|A0A4E0RSR4_FASHE_Target_of_rapamycin_complex_subunit_lst8_OS=Fasciola_hepatica_OX=6192_GN=D915_009474_PE=4_SV=1	10.74	22.1	31.6	T0+T5+T10	0	0	0	ND.	--	0.794343	--	--	--	--
maker-scaffold10x_1373_pilon-snap-gene-0.97-mRNA-1	A0A2H1BSR0	A0A2H1BSR0|A0A2H1BSR0_FASHE_DEAD/DEAH_box_helicase_(Fragment)_OS=Fasciola_hepatica_OX=6192_GN=D915_15150_PE=4_SV=1	19.26	25.72	29.04	T0+T5+T10	0	3.41	0	T5	--	--	--	--	--	--
maker-scaffold10x_1373_pilon-snap-gene-0.98-mRNA-1	A0A4E0R4E2	A0A4E0R4E2|A0A4E0R4E2_FASHE_PBPe_domain-containing_protein_OS=Fasciola_hepatica_OX=6192_GN=D915_006511_PE=4_SV=1	10.8	12.7	35.37	T0+T5+T10	0	0	0	ND.	--	1.22017	--	--	--	--
maker-scaffold10x_1373_pilon-snap-gene-0.99-mRNA-1	A0A504YQP8	A0A504YQP8|A0A504YQP8_FASGI_Putative_receptor_protein_tyrosine_phosphatase_OS=Fasciola_gigantica_OX=46835_GN=FGIG_08261_PE=4_SV=1	4.07	4.62	5.73	T0+T5+T10	0	0	0	ND.	--	--	--	--	--	--
maker-scaffold10x_1374_pilon-augustus-gene-0.12-mRNA-1	A0A4E0RZS5	A0A4E0RZS5|A0A4E0RZS5_FASHE_Mitochondrial_thiamine_pyrophosphate_carrier_OS=Fasciola_hepatica_OX=6192_GN=D915_000812_PE=3_SV=1	5.14	6.35	8.25	T0+T5+T10	0	0	0	ND.	--	--	--	--	--	--
maker-scaffold10x_1374_pilon-snap-gene-0.4-mRNA-1	A0A504ZF27	A0A504ZF27|A0A504ZF27_FASGI_RNA-binding_protein_NOB1_OS=Fasciola_gigantica_OX=46835_GN=FGIG_01230_PE=3_SV=1	196.01	276.54	380.51	T0+T5+T10	0	0	0	ND.	--	--	--	--	--	--
maker-scaffold10x_1374_pilon-snap-gene-0.5-mRNA-1	A0A4E0RR07	A0A4E0RR07|A0A4E0RR07_FASHE_Putative_arginine--tRNA_ligase_OS=Fasciola_hepatica_OX=6192_GN=D915_000809_PE=3_SV=1	7.65	21.6	18.19	T0+T5+T10	0	0	0	ND.	--	--	--	--	--	--
maker-scaffold10x_1376_pilon-augustus-gene-0.5-mRNA-1	A0A4E0RPR1	A0A4E0RPR1|A0A4E0RPR1_FASHE_Basement_membrane-specific_heparan_sulfate_proteoglycan_core_protein_OS=Fasciola_hepatica_OX=6192_GN=D915_000102_PE=4_SV=1	5.49	3.6	5.2	T0+T5+T10	0	0	0	ND.	-1.05371	--	--	--	--	--
maker-scaffold10x_1376_pilon-snap-gene-0.9-mRNA-1	A0A4E0RJ41	A0A4E0RJ41|A0A4E0RJ41_FASHE_Nucleoside_diphosphate-linked_moiety_X_motif_8_mitochondrial_OS=Fasciola_hepatica_OX=6192_GN=D915_000100_PE=4_SV=1	32.31	44.38	59.43	T0+T5+T10	0	0	0	ND.	--	--	--	--	--	--
maker-scaffold10x_1377_pilon-augustus-gene-0.14-mRNA-1	no hit	no hit	0.51	0	0.88	T0+T10	0	0	0	ND.	--	--	--	--	--	--
maker-scaffold10x_1377_pilon-pred_gff_StringTie-gene-0.17-mRNA-1	A0A183AXA4	A0A183AXA4|A0A183AXA4_9TREM_Receptor_protein_serine/threonine_kinase_OS=Echinostoma_caproni_OX=27848_GN=ECPE_LOCUS11589_PE=3_SV=1	1.77	3.26	3.41	T0+T5+T10	0	0	0	ND.	--	--	--	--	--	--
maker-scaffold10x_1377_pilon-pred_gff_StringTie-gene-0.18-mRNA-1	A0A2H1BSL2	A0A2H1BSL2|A0A2H1BSL2_FASHE_Receptor_protein_serine/threonine_kinase_OS=Fasciola_hepatica_OX=6192_GN=D915_010861_PE=3_SV=1	1.01	1.35	1.05	T0+T5+T10	0	0	0	ND.	--	--	--	--	--	--
maker-scaffold10x_1377_pilon-snap-gene-0.5-mRNA-1	A0A504Z523	A0A504Z523|A0A504Z523_FASGI_CDP-diacylglycerol--inositol_3-phosphatidyltransferase_OS=Fasciola_gigantica_OX=46835_GN=FGIG_11792_PE=3_SV=1	1.91	2.41	3.95	T0+T5+T10	0	0	0	ND.	--	--	--	--	--	--
maker-scaffold10x_1377_pilon-snap-gene-0.6-mRNA-1	A0A4E0R679	A0A4E0R679|A0A4E0R679_FASHE_Beta-arrestin-1_OS=Fasciola_hepatica_OX=6192_GN=D915_005345_PE=4_SV=1	16.93	18.75	23.56	T0+T5+T10	0	0	0	ND.	--	--	--	--	--	--
maker-scaffold10x_1377_pilon-snap-gene-0.8-mRNA-1	A0A4E0RMH6	A0A4E0RMH6|A0A4E0RMH6_FASHE_SWI/SNF_matrix-associated_actin-dependent_regulator_of_chromatin_subfamily_E_member_1_OS=Fasciola_hepatica_OX=6192_GN=D915_010851_PE=4_SV=1	3.06	8.08	13	T0+T5+T10	0	0	0	ND.	1.41794	1.47667	--	--	--	--
maker-scaffold10x_1382_pilon-augustus-gene-0.59-mRNA-1	A0A4E0RGB0	A0A4E0RGB0|A0A4E0RGB0_FASHE_Ragulator_complex_protein_LAMTOR4_OS=Fasciola_hepatica_OX=6192_GN=D915_002474_PE=4_SV=1	26.43	17.67	13.31	T0+T5+T10	0	0	0	ND.	-1.01121	-1.64538	--	--	--	--
maker-scaffold10x_1382_pilon-snap-gene-0.50-mRNA-1	A0A2H1C3Z8	A0A2H1C3Z8|A0A2H1C3Z8_FASHE_L23A_ribosomal_protein_natural_variant_OS=Fasciola_hepatica_OX=6192_GN=D915_007199_PE=3_SV=1	964.92	1326.15	1794.29	T0+T5+T10	1643.57	2689	1536.71	T0+T5+T10	--	--	--	--	--	--
maker-scaffold10x_1382_pilon-snap-gene-0.51-mRNA-1	no hit	no hit	94.1	58.86	45.99	T0+T5+T10	0	0	0	ND.	-1.09394	-1.69968	--	--	--	--
maker-scaffold10x_1382_pilon-snap-gene-0.53-mRNA-1	no hit	no hit	0.19	0	0	T0	0	0	0	ND.	--	-6.0038	--	--	--	--
maker-scaffold10x_1382_pilon-snap-gene-0.54-mRNA-1	A0A4E0RGQ6	A0A4E0RGQ6|A0A4E0RGQ6_FASHE_MAPK/ERK_kinase_1/2_OS=Fasciola_hepatica_OX=6192_GN=D915_002477_PE=4_SV=1	0.34	0	0	T0	0	0	0	ND.	--	--	--	--	--	--
maker-scaffold10x_1382_pilon-snap-gene-0.56-mRNA-1	A0A4E0R561	A0A4E0R561|A0A4E0R561_FASHE_Intraflagellar_transport_protein_20_OS=Fasciola_hepatica_OX=6192_GN=D915_005767_PE=4_SV=1	6.97	3.43	2.05	T0+T5+T10	0	0	0	ND.	--	-2.48865	--	--	--	--
maker-scaffold10x_1389_pilon-augustus-gene-0.23-mRNA-1	A0A4E0R0J6	A0A4E0R0J6|A0A4E0R0J6_FASHE_Heterogeneous_nuclear_ribonucleoprotein_L_OS=Fasciola_hepatica_OX=6192_GN=D915_007804_PE=4_SV=1	0.21	0.46	0	T0+T5	0	0	0	ND.	--	--	--	--	--	--
maker-scaffold10x_1389_pilon-snap-gene-0.29-mRNA-1	no hit	no hit	422.9	393.75	642.36	T0+T5+T10	0	0	0	ND.	--	--	--	--	--	--
maker-scaffold10x_1389_pilon-snap-gene-0.31-mRNA-1	A0A504Y4E5	A0A504Y4E5|A0A504Y4E5_FASGI_Smooth_isoform_G_OS=Fasciola_gigantica_OX=46835_GN=FGIG_05621_PE=4_SV=1	97.37	73.23	141.38	T0+T5+T10	0	0	0	ND.	-0.825485	--	--	--	--	--
maker-scaffold10x_1389_pilon-snap-gene-0.32-mRNA-1	A0A504Y4E5	A0A504Y4E5|A0A504Y4E5_FASGI_Smooth_isoform_G_OS=Fasciola_gigantica_OX=46835_GN=FGIG_05621_PE=4_SV=1	78.29	67.43	88.08	T0+T5+T10	0	0	0	ND.	-0.614789	-0.766304	--	--	--	--
maker-scaffold10x_1389_pilon-snap-gene-0.33-mRNA-1	A0A4E0RYC5	A0A4E0RYC5|A0A4E0RYC5_FASHE_DRBM_domain-containing_protein_OS=Fasciola_hepatica_OX=6192_GN=D915_007805_PE=4_SV=1	19.74	28.79	27.09	T0+T5+T10	0	0	0	ND.	--	--	--	--	--	--
maker-scaffold10x_1389_pilon-snap-gene-0.35-mRNA-1	no hit	no hit	24.43	31.4	32.97	T0+T5+T10	0	0	0	ND.	--	--	--	--	--	--
maker-scaffold10x_139_pilon-pred_gff_StringTie-gene-0.37-mRNA-1	W4XUR2	W4XUR2|W4XUR2_STRPU_Reverse_transcriptase_domain-containing_protein_OS=Strongylocentrotus_purpuratus_OX=7668_PE=4_SV=1	0.05	0	0.04	T0+T10	0	0	0	ND.	--	--	--	--	--	--
maker-scaffold10x_139_pilon-snap-gene-0.11-mRNA-1	A0A4E0RGP2	A0A4E0RGP2|A0A4E0RGP2_FASHE_Leucine-rich_repeat-containing_protein_56_OS=Fasciola_hepatica_OX=6192_GN=D915_002550_PE=4_SV=1	1.07	1.19	0.32	T0+T5+T10	0	0	0	ND.	--	--	--	--	--	--
maker-scaffold10x_139_pilon-snap-gene-0.12-mRNA-1	A0A4E0RDI1	A0A4E0RDI1|A0A4E0RDI1_FASHE_LTD_domain-containing_protein_OS=Fasciola_hepatica_OX=6192_GN=D915_003491_PE=4_SV=1	3.3	0	0	T0	0	0	0	ND.	-8.28233	-8.56816	--	--	--	--
maker-scaffold10x_139_pilon-snap-gene-0.13-mRNA-1	H2KTR1	H2KTR1|H2KTR1_CLOSI_DNAj_homolog_subfamily_C_member_OS=Clonorchis_sinensis_OX=79923_GN=CLF_105883_PE=4_SV=1	4.74	8.44	9.69	T0+T5+T10	0	0	0	ND.	--	--	--	--	--	--
maker-scaffold10x_139_pilon-snap-gene-0.5-mRNA-1	G4VGU5	G4VGU5|G4VGU5_SCHMA_Putative_cytochrome_c_oxidase_copper_chaperone_OS=Schistosoma_mansoni_OX=6183_GN=Smp_029150_PE=4_SV=1	84.24	106.4	129.01	T0+T5+T10	0	0	0	ND.	--	--	--	--	--	--
maker-scaffold10x_139_pilon-snap-gene-0.7-mRNA-1	A0A2H1CJQ1	A0A2H1CJQ1|A0A2H1CJQ1_FASHE_Leucine_Rich_repeat-containing_domain_protein_(Fragment)_OS=Fasciola_hepatica_OX=6192_GN=D915_05589_PE=4_SV=1	524.95	568.91	525.02	T0+T5+T10	0	98.47	14.19	T5+T10	--	-0.717095	--	--	--	--
maker-scaffold10x_139_pilon-snap-gene-0.8-mRNA-1	no hit	no hit	2.8	11.54	9.88	T0+T5+T10	0	0	0	ND.	1.59251	1.27807	--	--	--	--
maker-scaffold10x_139_pilon-snap-gene-0.9-mRNA-1	A0A4E0S1S0	A0A4E0S1S0|A0A4E0S1S0_FASHE_Ubiquitin_carboxyl-terminal_hydrolase_OS=Fasciola_hepatica_OX=6192_GN=D915_002450_PE=3_SV=1	0.45	0.07	0.31	T0+T5+T10	0	0	0	ND.	--	--	--	--	--	--
maker-scaffold10x_1390_pilon-snap-gene-0.2-mRNA-1	A0A4E0R3D7	A0A4E0R3D7|A0A4E0R3D7_FASHE_BRO1_domain_and_CAAX_motif_containing_OS=Fasciola_hepatica_OX=6192_GN=D915_006907_PE=4_SV=1	829.81	692.19	585.31	T0+T5+T10	83.59	158.54	83.51	T0+T5+T10	-0.597719	-1.18638	-0.524017	--	--	--
maker-scaffold10x_1399_pilon-snap-gene-0.14-mRNA-1	A0A504YGX0	A0A504YGX0|A0A504YGX0_FASGI_Transmembrane_emp24_domain-containing_protein_bai_OS=Fasciola_gigantica_OX=46835_GN=FGIG_06204_PE=3_SV=1	0.44	0	0	T0	239.69	369.33	296.55	T0+T5+T10	--	--	--	--	--	--
maker-scaffold10x_14_pilon-augustus-gene-0.12-mRNA-1	no hit	no hit	0.64	0	0	T0	0	0	0	ND.	--	--	--	--	--	--
maker-scaffold10x_14_pilon-augustus-gene-0.16-mRNA-1	A0A504YNM1	A0A504YNM1|A0A504YNM1_FASGI_tRNA_guanosine-2'-O-methyltransferase_TRM11_OS=Fasciola_gigantica_OX=46835_GN=FGIG_09962_PE=4_SV=1	11.04	16.48	24.56	T0+T5+T10	0	0	0	ND.	--	--	--	--	--	--
maker-scaffold10x_14_pilon-augustus-gene-0.21-mRNA-1	A0A4E0REH8	A0A4E0REH8|A0A4E0REH8_FASHE_KRR1_small_subunit_processome_component_OS=Fasciola_hepatica_OX=6192_GN=D915_008732_PE=3_SV=1	23.17	27	44.06	T0+T5+T10	0	0	0	ND.	--	--	--	--	--	--
maker-scaffold10x_14_pilon-pred_gff_StringTie-gene-0.42-mRNA-1	A0A504Y9Z1	A0A504Y9Z1|A0A504Y9Z1_FASGI_DUF4806_domain-containing_protein_OS=Fasciola_gigantica_OX=46835_GN=FGIG_09571_PE=4_SV=1	3.26	6.67	3.35	T0+T5+T10	0	0	0	ND.	--	--	--	--	--	--
maker-scaffold10x_14_pilon-snap-gene-0.109-mRNA-1	A0A4E0RXE3	A0A4E0RXE3|A0A4E0RXE3_FASHE_Glutamyl_tRNA_synthetase_cytoplasmic_OS=Fasciola_hepatica_OX=6192_GN=D915_002574_PE=3_SV=1	9.18	18.8	21.51	T0+T5+T10	43.42	79.46	23.42	T0+T5+T10	--	0.781378	--	--	--	--
maker-scaffold10x_14_pilon-snap-gene-0.110-mRNA-1	A0A4E0RWW2	A0A4E0RWW2|A0A4E0RWW2_FASHE_SPONdin_extracellular_matrix_glycoprotein_OS=Fasciola_hepatica_OX=6192_GN=D915_003124_PE=4_SV=1	0.61	0	1.02	T0+T10	0	0	0	ND.	--	--	--	--	--	--
maker-scaffold10x_14_pilon-snap-gene-0.111-mRNA-1	no hit	no hit	20.66	22.4	10.32	T0+T5+T10	0	0	0	ND.	--	-1.45499	--	--	--	--
maker-scaffold10x_14_pilon-snap-gene-0.113-mRNA-1	A0A4E0RBW8	A0A4E0RBW8|A0A4E0RBW8_FASHE_O-phosphoseryl-tRNA(Sec)_selenium_transferase_OS=Fasciola_hepatica_OX=6192_GN=D915_004459_PE=3_SV=1	11.41	24.53	31.51	T0+T5+T10	0	0	0	ND.	--	0.809299	--	--	--	--
maker-scaffold10x_14_pilon-snap-gene-0.115-mRNA-1	A0A504Y8G6	A0A504Y8G6|A0A504Y8G6_FASGI_Multiple_inositol_polyphosphate_phosphatase_OS=Fasciola_gigantica_OX=46835_GN=FGIG_09825_PE=3_SV=1	125.71	105.35	73.05	T0+T5+T10	0	0	0	ND.	-0.557785	-1.37067	-0.746879	--	--	--
maker-scaffold10x_14_pilon-snap-gene-0.117-mRNA-1	A0A4E0R6D6	A0A4E0R6D6|A0A4E0R6D6_FASHE_Nucleolar_GTP-binding_protein_2_OS=Fasciola_hepatica_OX=6192_GN=D915_005786_PE=3_SV=1	12.38	11.33	13.38	T0+T5+T10	0	0	0	ND.	--	--	--	--	--	--
maker-scaffold10x_14_pilon-snap-gene-0.120-mRNA-1	A0A504YM20	A0A504YM20|A0A504YM20_FASGI_Pre-mRNA-processing_factor_OS=Fasciola_gigantica_OX=46835_GN=FGIG_08966_PE=4_SV=1	58.63	107.64	146.04	T0+T5+T10	0	0	0	ND.	0.470605	--	--	--	--	--
maker-scaffold10x_14_pilon-snap-gene-0.122-mRNA-1	A0A4E0RB64	A0A4E0RB64|A0A4E0RB64_FASHE_Serine/threonine-protein_kinase_NIM1_OS=Fasciola_hepatica_OX=6192_GN=D915_005160_PE=4_SV=1	0	0.22	0	T5	0	0	0	ND.	--	--	--	--	--	--
maker-scaffold10x_14_pilon-snap-gene-0.124-mRNA-1	G7YKV9	G7YKV9|G7YKV9_CLOSI_C2_domain-containing_protein_3_OS=Clonorchis_sinensis_OX=79923_GN=CLF_110582_PE=4_SV=1	0.02	0	0	T0	0	0	0	ND.	--	--	--	--	--	--
maker-scaffold10x_14_pilon-snap-gene-0.125-mRNA-1	A0A2H1CK95	A0A2H1CK95|A0A2H1CK95_FASHE_CRAL-TRIO_domain-containing_protein_OS=Fasciola_hepatica_OX=6192_GN=D915_04740_PE=4_SV=1	202.62	132.99	69	T0+T5+T10	0	0	0	ND.	-1.03911	-2.14093	-1.04097	--	--	--
maker-scaffold10x_14_pilon-snap-gene-0.126-mRNA-1	A0A183AEE9	A0A183AEE9|A0A183AEE9_9TREM_Cytochrome_c_domain-containing_protein_OS=Echinostoma_caproni_OX=27848_GN=ECPE_LOCUS5334_PE=4_SV=1	148.69	203.91	318.84	T0+T5+T10	165.8	180.81	203.98	T0+T5+T10	--	--	--	--	--	0.840792
maker-scaffold10x_14_pilon-snap-gene-0.127-mRNA-1	A0A419PS17	A0A419PS17|A0A419PS17_CLOSI_Mitotic_spindle_assembly_checkpoint_protein_MAD1_OS=Clonorchis_sinensis_OX=79923_GN=MAD1L1_PE=4_SV=1	6.4	11.09	15.6	T0+T5+T10	0	0	0	ND.	--	0.583113	--	--	--	--
maker-scaffold10x_14_pilon-snap-gene-0.129-mRNA-1	A0A4E0RB79	A0A4E0RB79|A0A4E0RB79_FASHE_USP_domain-containing_protein_OS=Fasciola_hepatica_OX=6192_GN=D915_009976_PE=3_SV=1	38.82	106.66	140.7	T0+T5+T10	0	0	0	ND.	1.14355	1.21441	--	--	--	--
maker-scaffold10x_14_pilon-snap-gene-0.130-mRNA-1	A0A504YP75	A0A504YP75|A0A504YP75_FASGI_HORMA_domain-containing_protein_2_OS=Fasciola_gigantica_OX=46835_GN=FGIG_01587_PE=4_SV=1	1.69	1.24	1.47	T0+T5+T10	0	0	0	ND.	--	--	--	--	--	--
maker-scaffold10x_14_pilon-snap-gene-0.131-mRNA-1	A0A4E0RAH7	A0A4E0RAH7|A0A4E0RAH7_FASHE_Amino_acid_transporter_OS=Fasciola_hepatica_OX=6192_GN=D915_003789_PE=3_SV=1	0	0.51	0.52	T5+T10	0	0	0	ND.	--	--	--	--	--	--
maker-scaffold10x_14_pilon-snap-gene-0.134-mRNA-1	A0A075A1T1	A0A075A1T1|A0A075A1T1_9TREM_Methyltransf_11_domain-containing_protein_OS=Opisthorchis_viverrini_OX=6198_GN=T265_03889_PE=4_SV=1	16.27	18.36	24.8	T0+T5+T10	0	0	0	ND.	--	--	--	--	--	--
maker-scaffold10x_1404_pilon-augustus-gene-0.44-mRNA-1	A0A2H1C4J5	A0A2H1C4J5|A0A2H1C4J5_FASHE_CTLH_domain-containing_protein_OS=Fasciola_hepatica_OX=6192_GN=D915_11436_PE=4_SV=1	16.28	18.83	12.39	T0+T5+T10	0	0	0	ND.	--	-1.00563	-0.900733	--	--	--
maker-scaffold10x_1404_pilon-augustus-gene-0.46-mRNA-1	A0A4E0R6K6	A0A4E0R6K6|A0A4E0R6K6_FASHE_Transcription_initiation_factor_TFIIH_subunit_1_OS=Fasciola_hepatica_OX=6192_GN=D915_006541_PE=4_SV=1	5.81	9.49	8.94	T0+T5+T10	0	0	0	ND.	--	--	--	--	--	--
maker-scaffold10x_1404_pilon-augustus-gene-0.48-mRNA-1	A0A4E0RBP5	A0A4E0RBP5|A0A4E0RBP5_FASHE_PDEase_domain-containing_protein_OS=Fasciola_hepatica_OX=6192_GN=D915_005728_PE=3_SV=1	12.73	21.18	11.51	T0+T5+T10	0	0	0	ND.	--	--	-0.934221	--	--	--
maker-scaffold10x_1404_pilon-snap-gene-0.11-mRNA-1	A0A4E0R0K7	A0A4E0R0K7|A0A4E0R0K7_FASHE_MARVEL_domain-containing_protein_OS=Fasciola_hepatica_OX=6192_GN=D915_008525_PE=4_SV=1	5.19	3.2	3.82	T0+T5+T10	0	0	0	ND.	-1.08132	-0.955029	--	--	--	--
maker-scaffold10x_1404_pilon-snap-gene-0.13-mRNA-1	A0A4E0RFJ3	A0A4E0RFJ3|A0A4E0RFJ3_FASHE_Vacuolar-sorting_protein_SNF8_OS=Fasciola_hepatica_OX=6192_GN=D915_002910_PE=3_SV=1	120.8	88.25	88.38	T0+T5+T10	0	0	0	ND.	-0.904331	-0.867058	--	--	--	--
maker-scaffold10x_1404_pilon-snap-gene-0.14-mRNA-1	A0A4E0RUC9	A0A4E0RUC9|A0A4E0RUC9_FASHE_Arginine:serine_rich_splicing_factor_OS=Fasciola_hepatica_OX=6192_GN=D915_008524_PE=4_SV=1	161.46	359.29	610.34	T0+T5+T10	0	46.42	0	T5	0.812651	1.13146	--	--	--	-3.62456
maker-scaffold10x_1404_pilon-snap-gene-0.15-mRNA-1	A0A504YL47	A0A504YL47|A0A504YL47_FASGI_Tyrosine-protein_kinase_transmembrane_receptor_Ror_OS=Fasciola_gigantica_OX=46835_GN=FGIG_05715_PE=4_SV=1	18.72	14.82	15.26	T0+T5+T10	0	0	0	ND.	-0.755227	-0.915044	--	--	--	--
maker-scaffold10x_1404_pilon-snap-gene-0.16-mRNA-1	A0A5J4NFP6	A0A5J4NFP6|A0A5J4NFP6_9TREM_Coiled-coil_and_C2_domain-containing_protein_1_OS=Paragonimus_westermani_OX=34504_GN=DEA37_0009087_PE=4_SV=1	0.41	0.31	0.41	T0+T5+T10	0	0	0	ND.	--	--	--	--	--	--
maker-scaffold10x_1404_pilon-snap-gene-0.17-mRNA-1	A0A4E0RCE0	A0A4E0RCE0|A0A4E0RCE0_FASHE_PIH1_domain-containing_protein_1_OS=Fasciola_hepatica_OX=6192_GN=D915_002913_PE=4_SV=1	3.94	7.33	8.81	T0+T5+T10	0	0	0	ND.	--	--	--	--	--	--
maker-scaffold10x_1404_pilon-snap-gene-0.9-mRNA-1	A0A4E0R020	A0A4E0R020|A0A4E0R020_FASHE_WD_repeat-containing_protein_18_OS=Fasciola_hepatica_OX=6192_GN=D915_009422_PE=4_SV=1	9.63	12.64	20.45	T0+T5+T10	0	0	0	ND.	--	--	--	--	--	--
maker-scaffold10x_1410_pilon-augustus-gene-0.57-mRNA-1	A0A4E0RYV0	A0A4E0RYV0|A0A4E0RYV0_FASHE_Tektin-4_OS=Fasciola_hepatica_OX=6192_GN=D915_005101_PE=4_SV=1	7.4	5.61	4.03	T0+T5+T10	0	0	0	ND.	--	-1.51863	--	--	--	--
maker-scaffold10x_1410_pilon-augustus-gene-0.65-mRNA-1	A0A2H1CFA8	A0A2H1CFA8|A0A2H1CFA8_FASHE_U5_small_nuclear_ribonucleoprotein_40_kDa_OS=Fasciola_hepatica_OX=6192_GN=D915_004161_PE=4_SV=1	29.43	37.29	42.81	T0+T5+T10	0	0	0	ND.	--	--	--	--	--	--
maker-scaffold10x_1410_pilon-augustus-gene-0.68-mRNA-1	A0A4S2LW77	A0A4S2LW77|A0A4S2LW77_OPIFE_EF-hand_domain-containing_protein_OS=Opisthorchis_felineus_OX=147828_GN=CRM22_005640_PE=4_SV=1	5.05	3.59	2.87	T0+T5+T10	0	0	0	ND.	--	--	--	--	--	--
maker-scaffold10x_1410_pilon-snap-gene-0.22-mRNA-1	A0A4E0RND4	A0A4E0RND4|A0A4E0RND4_FASHE_Protein-L-isoaspartate_O-methyltransferase_domain-containing_protein_1_OS=Fasciola_hepatica_OX=6192_GN=D915_007101_PE=4_SV=1	51.99	50.48	51.87	T0+T5+T10	0	0	0	ND.	-0.457335	-0.744497	--	--	--	--
maker-scaffold10x_1410_pilon-snap-gene-0.23-mRNA-1	A0A4E0RZS7	A0A4E0RZS7|A0A4E0RZS7_FASHE_Transcription-associated_protein_1_OS=Fasciola_hepatica_OX=6192_GN=D915_004162_PE=4_SV=1	2.29	7.77	7.24	T0+T5+T10	0	0	0	ND.	0.897117	0.629453	--	--	--	--
maker-scaffold10x_1410_pilon-snap-gene-0.24-mRNA-1	A0A4E0S107	A0A4E0S107|A0A4E0S107_FASHE_Prominin-1-A_OS=Fasciola_hepatica_OX=6192_GN=D915_005283_PE=4_SV=1	367.21	283.2	234.55	T0+T5+T10	0	0	0	ND.	-0.815856	-1.41034	-0.528067	--	--	--
maker-scaffold10x_1410_pilon-snap-gene-0.27-mRNA-1	A0A2H1CEW2	A0A2H1CEW2|A0A2H1CEW2_FASHE_Zinc_finger,_C2H2_type_OS=Fasciola_hepatica_OX=6192_GN=D915_06717_PE=4_SV=1	0	2.44	9.93	T5+T10	0	0	0	ND.	6.87034	9.05027	2.24517	--	--	--
maker-scaffold10x_1410_pilon-snap-gene-0.28-mRNA-1	A0A4E0RXX4	A0A4E0RXX4|A0A4E0RXX4_FASHE_5-azacytidine-induced_protein_1_(Fragment)_OS=Fasciola_hepatica_OX=6192_GN=D915_008242_PE=4_SV=1	0.1	0.75	0.84	T0+T5+T10	0	0	0	ND.	--	--	--	--	--	--
maker-scaffold10x_1410_pilon-snap-gene-0.29-mRNA-1	A0A504YF54	A0A504YF54|A0A504YF54_FASGI_Putative_ATP-dependent_RNA_helicase_DDX52_OS=Fasciola_gigantica_OX=46835_GN=FGIG_05705_PE=4_SV=1	0.09	0	0	T0	0	0	0	ND.	--	--	--	--	--	--
maker-scaffold10x_1410_pilon-snap-gene-0.31-mRNA-1	A0A504YEH8	A0A504YEH8|A0A504YEH8_FASGI_Tektin-4_OS=Fasciola_gigantica_OX=46835_GN=FGIG_02153_PE=4_SV=1	0.79	0	0	T0	0	0	0	ND.	--	--	--	--	--	--
maker-scaffold10x_1410_pilon-snap-gene-0.32-mRNA-1	A0A4E0RCU8	A0A4E0RCU8|A0A4E0RCU8_FASHE_Glutamate_receptor_ionotropic_kainate_3_OS=Fasciola_hepatica_OX=6192_GN=D915_005100_PE=3_SV=1	1.69	0.82	0.83	T0+T5+T10	0	0	0	ND.	--	-1.40263	--	--	--	--
maker-scaffold10x_1412_pilon-augustus-gene-0.15-mRNA-1	A0A2H1C3D0	A0A2H1C3D0|A0A2H1C3D0_FASHE_Origin_recognition_complex_subunit_1_OS=Fasciola_hepatica_OX=6192_GN=D915_11090_PE=3_SV=1	8.29	15.64	30.53	T0+T5+T10	0	0	0	ND.	--	0.866205	--	--	--	--
maker-scaffold10x_1412_pilon-snap-gene-0.8-mRNA-1	A0A504YPF0	A0A504YPF0|A0A504YPF0_FASGI_Folylpolyglutamate_synthase_mitochondrial_OS=Fasciola_gigantica_OX=46835_GN=FGIG_00207_PE=4_SV=1	0	0.12	0.65	T5+T10	0	0	0	ND.	--	5.80782	--	--	--	--
maker-scaffold10x_1412_pilon-snap-gene-0.9-mRNA-1	no hit	no hit	0	0.82	0.52	T5+T10	0	0	0	ND.	--	--	--	--	--	--
maker-scaffold10x_142_pilon-augustus-gene-0.22-mRNA-1	A0A4E0RX90	A0A4E0RX90|A0A4E0RX90_FASHE_Abhydrolase_domain-containing_protein_16A_OS=Fasciola_hepatica_OX=6192_GN=D915_002798_PE=4_SV=1	2.5	5.13	6.87	T0+T5+T10	0	0	0	ND.	--	--	--	--	--	--
maker-scaffold10x_142_pilon-augustus-gene-0.28-mRNA-1	no hit	no hit	1.08	6.36	7.32	T0+T5+T10	0	0	0	ND.	1.6009	1.83587	--	--	--	--
maker-scaffold10x_142_pilon-augustus-gene-0.31-mRNA-1	A0A4E0RBI6	A0A4E0RBI6|A0A4E0RBI6_FASHE_Radial_spoke_head_protein_4_A_OS=Fasciola_hepatica_OX=6192_GN=D915_003278_PE=4_SV=1	0	0	0	ND.	255.43	0	0	T0	--	--	--	--	-6.24236	--
maker-scaffold10x_142_pilon-augustus-gene-0.41-mRNA-1	A0A4E0QY52	A0A4E0QY52|A0A4E0QY52_FASHE_Deoxythymidylate_kinase_(Thymidylate_kinase)_OS=Fasciola_hepatica_OX=6192_GN=D915_010469_PE=3_SV=1	70.44	77.89	102.29	T0+T5+T10	0	0	0	ND.	--	--	--	--	--	--
maker-scaffold10x_142_pilon-pred_gff_StringTie-gene-0.106-mRNA-1	no hit	no hit	0	0.2	0	T5	0	0	0	ND.	--	--	--	--	--	--
maker-scaffold10x_142_pilon-pred_gff_StringTie-gene-0.156-mRNA-1	Q6IFT8	Q6IFT8|Q6IFT8_SCHMA_Pol_polyprotein_OS=Schistosoma_mansoni_OX=6183_PE=2_SV=1	4.24	4.43	4.04	T0+T5+T10	0	0	0	ND.	--	-0.764557	--	--	--	--
maker-scaffold10x_142_pilon-pred_gff_StringTie-gene-0.167-mRNA-1	no hit	no hit	2.26	3.69	5.46	T0+T5+T10	0	0	0	ND.	--	0.634548	--	--	--	--
maker-scaffold10x_142_pilon-snap-gene-0.63-mRNA-1	A0A2H1CJL2	A0A2H1CJL2|A0A2H1CJL2_FASHE_6-phosphogluconolactonase_(Fragment)_OS=Fasciola_hepatica_OX=6192_GN=D915_05006_PE=3_SV=1	0.42	0.54	0.49	T0+T5+T10	0	0	0	ND.	--	--	--	--	--	--
maker-scaffold10x_142_pilon-snap-gene-0.64-mRNA-1	no hit	no hit	0.38	2.9	2.18	T0+T5+T10	0	0	0	ND.	--	--	--	--	--	--
maker-scaffold10x_142_pilon-snap-gene-0.66-mRNA-1	A0A4E0R3W4	A0A4E0R3W4|A0A4E0R3W4_FASHE_Ras-specific_guanine_nucleotide-releasing_factor_RalGPS1_OS=Fasciola_hepatica_OX=6192_GN=D915_006820_PE=4_SV=1	7.67	16.23	17.62	T0+T5+T10	0	0	0	ND.	--	--	--	--	--	--
maker-scaffold10x_142_pilon-snap-gene-0.69-mRNA-1	A0A4E0R3S9	A0A4E0R3S9|A0A4E0R3S9_FASHE_Coenzyme_Q6_monooxygenase_OS=Fasciola_hepatica_OX=6192_GN=D915_008322_PE=4_SV=1	35.17	25.79	39.31	T0+T5+T10	0	0	0	ND.	-0.841516	-0.659395	--	--	--	--
maker-scaffold10x_142_pilon-snap-gene-0.70-mRNA-1	A0A4E0RTW0	A0A4E0RTW0|A0A4E0RTW0_FASHE_E3_ubiquitin-protein_ligase_OS=Fasciola_hepatica_OX=6192_GN=D915_004294_PE=3_SV=1	3.79	5.19	6.76	T0+T5+T10	0	0	0	ND.	--	--	--	--	--	--
maker-scaffold10x_142_pilon-snap-gene-0.71-mRNA-1	A0A4E0RV04	A0A4E0RV04|A0A4E0RV04_FASHE_RalA-binding_protein_1_OS=Fasciola_hepatica_OX=6192_GN=D915_004293_PE=4_SV=1	0.71	0.85	2.43	T0+T5+T10	0	0	0	ND.	--	--	--	--	--	--
maker-scaffold10x_142_pilon-snap-gene-0.73-mRNA-1	A0A4S2LW33	A0A4S2LW33|A0A4S2LW33_OPIFE_Proteasome_endopeptidase_complex_OS=Opisthorchis_felineus_OX=147828_GN=CRM22_005644_PE=3_SV=1	35.14	44.55	86.4	T0+T5+T10	99.94	109.34	168.61	T0+T5+T10	--	0.7333	0.81347	--	--	1.3992
maker-scaffold10x_142_pilon-snap-gene-0.74-mRNA-1	A0A4E0RU54	A0A4E0RU54|A0A4E0RU54_FASHE_Lysocardiolipin_acyltransferase_1_OS=Fasciola_hepatica_OX=6192_GN=D915_004006_PE=4_SV=1	26.31	34.8	25.01	T0+T5+T10	0	0	0	ND.	--	-0.7112	--	--	--	--
maker-scaffold10x_142_pilon-snap-gene-0.79-mRNA-1	A0A4E0RGS5	A0A4E0RGS5|A0A4E0RGS5_FASHE_BAT2_N_domain-containing_protein_OS=Fasciola_hepatica_OX=6192_GN=D915_003280_PE=4_SV=1	8.32	17.66	15.67	T0+T5+T10	0	0	0	ND.	--	--	--	--	--	--
maker-scaffold10x_142_pilon-snap-gene-0.80-mRNA-1	A0A4E0RVI6	A0A4E0RVI6|A0A4E0RVI6_FASHE_Prohormone-4_OS=Fasciola_hepatica_OX=6192_GN=D915_002799_PE=4_SV=1	0	0	0.11	T10	0	0	0	ND.	--	--	--	--	--	--
maker-scaffold10x_142_pilon-snap-gene-0.82-mRNA-1	A0A2H1C2W3	A0A2H1C2W3|A0A2H1C2W3_FASHE_Ras_family_protein_OS=Fasciola_hepatica_OX=6192_GN=D915_11269_PE=4_SV=1	1.83	2.19	3.59	T0+T5+T10	0	0	0	ND.	--	--	--	--	--	--
maker-scaffold10x_142_pilon-snap-gene-0.83-mRNA-1	A0A4E0RFE1	A0A4E0RFE1|A0A4E0RFE1_FASHE_Fragile_X_mental_retardation_syndrome_1_OS=Fasciola_hepatica_OX=6192_GN=D915_009388_PE=4_SV=1	29.05	49.57	42.45	T0+T5+T10	4.99	37.74	0	T0+T5	--	--	--	--	--	--
maker-scaffold10x_142_pilon-snap-gene-0.84-mRNA-1	A0A504Y5I9	A0A504Y5I9|A0A504Y5I9_FASGI_AP-2_complex_subunit_mu-A_OS=Fasciola_gigantica_OX=46835_GN=FGIG_03599_PE=3_SV=1	100.28	132.58	161.63	T0+T5+T10	0	0	0	ND.	--	--	--	--	--	--
maker-scaffold10x_1420_pilon-augustus-gene-0.75-mRNA-1	G7Y5S6	G7Y5S6|G7Y5S6_CLOSI_Centrosomal_protein_of_19_kDa_OS=Clonorchis_sinensis_OX=79923_GN=CLF_101450_PE=4_SV=1	89.2	43.11	22.17	T0+T5+T10	0	0	0	ND.	-1.35045	-2.29631	--	--	--	--
maker-scaffold10x_1420_pilon-snap-gene-0.41-mRNA-1	A0A504YP20	A0A504YP20|A0A504YP20_FASGI_Programmed_cell_death_protein_6_OS=Fasciola_gigantica_OX=46835_GN=FGIG_12457_PE=4_SV=1	75.06	122.65	199.67	T0+T5+T10	0	0	0	ND.	--	0.588862	--	--	--	--
maker-scaffold10x_1420_pilon-snap-gene-0.42-mRNA-1	A0A4E0S2T2	A0A4E0S2T2|A0A4E0S2T2_FASHE_Programmed_cell_death_protein_6_OS=Fasciola_hepatica_OX=6192_GN=D915_000927_PE=4_SV=1	50.13	97.97	151.1	T0+T5+T10	0	0	0	ND.	0.547431	0.712913	--	--	--	--
maker-scaffold10x_1420_pilon-snap-gene-0.43-mRNA-1	A0A4E0RX98	A0A4E0RX98|A0A4E0RX98_FASHE_Casein_kinase_II_subunit_beta_OS=Fasciola_hepatica_OX=6192_GN=D915_008883_PE=3_SV=1	336.69	490.51	660.53	T0+T5+T10	0	0	0	ND.	--	--	--	--	--	--
maker-scaffold10x_1420_pilon-snap-gene-0.44-mRNA-1	A0A4E0RTK1	A0A4E0RTK1|A0A4E0RTK1_FASHE_AAA_family_ATPase_OS=Fasciola_hepatica_OX=6192_GN=D915_004591_PE=4_SV=1	5.74	8.17	13.65	T0+T5+T10	0	0	0	ND.	--	--	--	--	--	--
maker-scaffold10x_1420_pilon-snap-gene-0.45-mRNA-1	A0A2H1BZK2	A0A2H1BZK2|A0A2H1BZK2_FASHE_SAC3/GANP_family_protein_OS=Fasciola_hepatica_OX=6192_GN=D915_12538_PE=4_SV=1	198.6	277.62	397.35	T0+T5+T10	6.38	20.41	0	T0+T5	--	--	--	--	--	--
maker-scaffold10x_1420_pilon-snap-gene-0.48-mRNA-1	A0A4E0RMI5	A0A4E0RMI5|A0A4E0RMI5_FASHE_G_PROTEIN_RECEP_F1_2_domain-containing_protein_OS=Fasciola_hepatica_OX=6192_GN=D915_000926_PE=4_SV=1	2471.08	1513.89	1049.56	T0+T5+T10	633.7	669.14	613.51	T0+T5+T10	-1.07936	-1.70433	--	--	--	--
maker-scaffold10x_1420_pilon-snap-gene-0.49-mRNA-1	A0A4E0S3S5	A0A4E0S3S5|A0A4E0S3S5_FASHE_Putative_ank_repeat-containing_OS=Fasciola_hepatica_OX=6192_GN=D915_000925_PE=4_SV=1	0	0	2.05	T10	0	0	0	ND.	--	--	--	--	--	--
maker-scaffold10x_1420_pilon-snap-gene-0.50-mRNA-1	A0A4E0RGS6	A0A4E0RGS6|A0A4E0RGS6_FASHE_Tau-tubulin_kinase_1_OS=Fasciola_hepatica_OX=6192_GN=D915_000924_PE=4_SV=1	0.03	0.66	0.69	T0+T5+T10	0	0	0	ND.	3.65841	3.48457	--	--	--	--
maker-scaffold10x_1420_pilon-snap-gene-0.51-mRNA-1	A0A4E0RXF1	A0A4E0RXF1|A0A4E0RXF1_FASHE_Fras1_extracellular_matrix_protein_OS=Fasciola_hepatica_OX=6192_GN=D915_000923_PE=4_SV=1	0.43	0.88	1.27	T0+T5+T10	0	0	0	ND.	--	--	--	--	--	--
maker-scaffold10x_1420_pilon-snap-gene-0.52-mRNA-1	A0A4E0RUM6	A0A4E0RUM6|A0A4E0RUM6_FASHE_Neuroligin-4_X-linked_protein_OS=Fasciola_hepatica_OX=6192_GN=D915_004590_PE=4_SV=1	0.07	0.07	0.04	T0+T5+T10	0	0	0	ND.	--	--	--	--	--	--
maker-scaffold10x_1420_pilon-snap-gene-0.54-mRNA-1	A0A4E0RDL0	A0A4E0RDL0|A0A4E0RDL0_FASHE_Neuronal_acetylcholine_receptor_subunit_alpha-2_OS=Fasciola_hepatica_OX=6192_GN=D915_004588_PE=3_SV=1	0.19	0	0	T0	0	0	0	ND.	--	--	--	--	--	--
maker-scaffold10x_1420_pilon-snap-gene-0.55-mRNA-1	A0A4E0REL8	A0A4E0REL8|A0A4E0REL8_FASHE_Dynamin_GTPase_OS=Fasciola_hepatica_OX=6192_GN=D915_004587_PE=3_SV=1	9.58	28.06	33.35	T0+T5+T10	0	0	0	ND.	1.15018	1.56206	--	--	--	--
maker-scaffold10x_1420_pilon-snap-gene-0.56-mRNA-1	A0A4Z2DDA7	A0A4Z2DDA7|A0A4Z2DDA7_SCHJA_Nephrocystin-4_isoform_2_OS=Schistosoma_japonicum_OX=6182_GN=EWB00_002159_PE=4_SV=1	0.61	1.15	2.61	T0+T5+T10	0	0	0	ND.	--	1.73609	--	--	--	--
maker-scaffold10x_1420_pilon-snap-gene-0.57-mRNA-1	A0A4E0RZA8	A0A4E0RZA8|A0A4E0RZA8_FASHE_WD_repeat-containing_protein_44_OS=Fasciola_hepatica_OX=6192_GN=D915_006448_PE=4_SV=1	5.57	10.39	11.3	T0+T5+T10	0	0	0	ND.	--	--	--	--	--	--
maker-scaffold10x_1421_pilon-snap-gene-0.3-mRNA-1	A0A4E0RTR7	A0A4E0RTR7|A0A4E0RTR7_FASHE_TGS1_OS=Fasciola_hepatica_OX=6192_GN=D915_005069_PE=4_SV=1	10.96	10.77	15.64	T0+T5+T10	0	0	0	ND.	--	--	--	--	--	--
maker-scaffold10x_1422_pilon-snap-gene-0.1-mRNA-1	A0A4E0R481	A0A4E0R481|A0A4E0R481_FASHE_Putative_mitochondrial_aspartate/glutamate_carrier_protein_OS=Fasciola_hepatica_OX=6192_GN=D915_007802_PE=4_SV=1	26.41	33.13	44.54	T0+T5+T10	0	0	0	ND.	--	--	--	--	--	--
maker-scaffold10x_1422_pilon-snap-gene-0.2-mRNA-1	A0A4E0R481	A0A4E0R481|A0A4E0R481_FASHE_Putative_mitochondrial_aspartate/glutamate_carrier_protein_OS=Fasciola_hepatica_OX=6192_GN=D915_007802_PE=4_SV=1	4.26	7.23	6.76	T0+T5+T10	0	0	0	ND.	--	--	--	--	--	--
maker-scaffold10x_1422_pilon-snap-gene-0.3-mRNA-1	A0A2H1CWM4	A0A2H1CWM4|A0A2H1CWM4_FASHE_DUF4476_domain-containing_protein_OS=Fasciola_hepatica_OX=6192_GN=D915_00471_PE=4_SV=1	0	0	0	ND.	225.88	74.01	216.97	T0+T5+T10	--	--	--	--	--	2.74094
maker-scaffold10x_1424_pilon-augustus-gene-0.45-mRNA-1	A0A4E0RCV0	A0A4E0RCV0|A0A4E0RCV0_FASHE_Kinesin_protein_OS=Fasciola_hepatica_OX=6192_GN=D915_002464_PE=3_SV=1	0.03	0	0.03	T0+T10	0	0	0	ND.	--	--	--	--	--	--
maker-scaffold10x_1424_pilon-pred_gff_StringTie-gene-0.21-mRNA-1	no hit	no hit	88.21	98.28	137.85	T0+T5+T10	0	0	0	ND.	--	--	--	--	--	--
maker-scaffold10x_1424_pilon-snap-gene-0.12-mRNA-1	A0A504YUY8	A0A504YUY8|A0A504YUY8_FASGI_Translation_initiation_factor_3_subunit_H_OS=Fasciola_gigantica_OX=46835_GN=FGIG_00015_PE=4_SV=1	36.59	66.82	124.48	T0+T5+T10	0	0	0	ND.	--	0.934646	0.546873	--	--	--
maker-scaffold10x_1424_pilon-snap-gene-0.13-mRNA-1	no hit	no hit	2.19	4.07	4.54	T0+T5+T10	0	0	0	ND.	--	--	--	--	--	--
maker-scaffold10x_1424_pilon-snap-gene-0.15-mRNA-1	A0A2H1CM70	A0A2H1CM70|A0A2H1CM70_FASHE_Barrier_to_autointegration_factor_OS=Fasciola_hepatica_OX=6192_GN=D915_04009_PE=4_SV=1	0.8	3.37	4.32	T0+T5+T10	0	228.25	542.53	T5+T10	--	--	--	--	--	1.60987
maker-scaffold10x_1425_pilon-augustus-gene-0.1-mRNA-1	A0A4E0R2J1	A0A4E0R2J1|A0A4E0R2J1_FASHE_Putative_microtubule-associated_protein_OS=Fasciola_hepatica_OX=6192_GN=D915_008964_PE=4_SV=1	0	0.09	0	T5	0	0	0	ND.	--	--	--	--	--	--
maker-scaffold10x_1425_pilon-snap-gene-0.15-mRNA-1	A0A504YJP1	A0A504YJP1|A0A504YJP1_FASGI_Microtubule-associated_protein_futsch_OS=Fasciola_gigantica_OX=46835_GN=FGIG_00043_PE=4_SV=1	261.84	335.25	268.61	T0+T5+T10	0	0	0	ND.	--	-0.60365	--	--	--	--
maker-scaffold10x_1425_pilon-snap-gene-0.16-mRNA-1	A0A4E0RI10	A0A4E0RI10|A0A4E0RI10_FASHE_UPF0506_domain-containing_protein_OS=Fasciola_hepatica_OX=6192_GN=D915_001814_PE=4_SV=1	0	1.84	6.29	T5+T10	0	0	0	ND.	--	6.39582	--	--	--	--
maker-scaffold10x_1425_pilon-snap-gene-0.21-mRNA-1	A0A4E0R0M7	A0A4E0R0M7|A0A4E0R0M7_FASHE_FAS-associated_factor_2_OS=Fasciola_hepatica_OX=6192_GN=D915_008308_PE=4_SV=1	19.21	41.39	34.01	T0+T5+T10	0	0	0	ND.	--	--	--	--	--	--
maker-scaffold10x_1427_pilon-augustus-gene-0.45-mRNA-1	A0A4Z2DUC7	A0A4Z2DUC7|A0A4Z2DUC7_SCHJA_UPF0764_protein_C16orf89_OS=Schistosoma_japonicum_OX=6182_GN=EWB00_005481_PE=4_SV=1	0.18	0.33	0	T0+T5	0	0	0	ND.	--	--	--	--	--	--
maker-scaffold10x_1427_pilon-augustus-gene-0.46-mRNA-1	A0A4E0RTJ2	A0A4E0RTJ2|A0A4E0RTJ2_FASHE_Serine/threonine-protein_kinase_19_OS=Fasciola_hepatica_OX=6192_GN=D915_008976_PE=4_SV=1	3.71	6.68	17.13	T0+T5+T10	0	0	0	ND.	--	1.30693	--	--	--	--
maker-scaffold10x_1427_pilon-pred_gff_StringTie-gene-0.23-mRNA-1	A0A2H1CV16	A0A2H1CV16|A0A2H1CV16_FASHE_DnaJ_domain_protein_OS=Fasciola_hepatica_OX=6192_GN=D915_001303_PE=4_SV=1	21.09	12.19	8.6	T0+T5+T10	0	0	0	ND.	-1.16452	-1.76989	--	--	--	--
maker-scaffold10x_1427_pilon-pred_gff_StringTie-gene-0.41-mRNA-1	A0A4E0RUT4	A0A4E0RUT4|A0A4E0RUT4_FASHE_SWIM-type_domain-containing_protein_OS=Fasciola_hepatica_OX=6192_GN=D915_003548_PE=4_SV=1	15.93	13.9	23.47	T0+T5+T10	0	0	0	ND.	--	--	--	--	--	--
maker-scaffold10x_1427_pilon-snap-gene-0.10-mRNA-1	A0A4E0R2A5	A0A4E0R2A5|A0A4E0R2A5_FASHE_KN_motif_and_ankyrin_repeat_domain-containing_protein_2_OS=Fasciola_hepatica_OX=6192_GN=D915_007869_PE=4_SV=1	1.73	0.77	0.74	T0+T5+T10	0	0	0	ND.	--	-1.92623	--	--	--	--
maker-scaffold10x_1427_pilon-snap-gene-0.11-mRNA-1	A0A4E0RTJ2	A0A4E0RTJ2|A0A4E0RTJ2_FASHE_Serine/threonine-protein_kinase_19_OS=Fasciola_hepatica_OX=6192_GN=D915_008976_PE=4_SV=1	9.6	13.26	13.98	T0+T5+T10	0	0	0	ND.	--	--	--	--	--	--
maker-scaffold10x_1427_pilon-snap-gene-0.5-mRNA-1	A0A095A5X7	A0A095A5X7|A0A095A5X7_SCHHA_Protein_FAM183A_OS=Schistosoma_haematobium_OX=6185_GN=MS3_09557_PE=4_SV=1	0.07	0	0	T0	0	0	0	ND.	--	--	--	--	--	--
maker-scaffold10x_1427_pilon-snap-gene-0.9-mRNA-1	A0A4E0R8D3	A0A4E0R8D3|A0A4E0R8D3_FASHE_Phosphatase_inhibitor_OS=Fasciola_hepatica_OX=6192_GN=D915_006495_PE=4_SV=1	822.23	640.12	684.31	T0+T5+T10	0	0	0	ND.	-0.886281	-1.094	--	--	--	--
maker-scaffold10x_1428_pilon-augustus-gene-0.20-mRNA-1	A0A2H1BZC5	A0A2H1BZC5|A0A2H1BZC5_FASHE_Apoptosis_regulator_protein,_Bcl-2_family_(Fragment)_OS=Fasciola_hepatica_OX=6192_GN=D915_12598_PE=4_SV=1	234.86	241.77	154.67	T0+T5+T10	0	37.81	0	T5	--	-1.1289	-0.742284	--	--	-3.52895
maker-scaffold10x_1428_pilon-snap-gene-0.5-mRNA-1	A0A504YQE4	A0A504YQE4|A0A504YQE4_FASGI_Putative_vacuolar_protein_sorting_26_vps26_OS=Fasciola_gigantica_OX=46835_GN=FGIG_01566_PE=4_SV=1	4.38	6.25	9.3	T0+T5+T10	0	0	0	ND.	--	--	--	--	--	--
maker-scaffold10x_1428_pilon-snap-gene-0.6-mRNA-1	A0A4E0RVQ9	A0A4E0RVQ9|A0A4E0RVQ9_FASHE_Katanin_p60_ATPase-containing_subunit_A-like_2_OS=Fasciola_hepatica_OX=6192_GN=KATNAL2_PE=3_SV=1	0.18	0.03	0.19	T0+T5+T10	0	0	0	ND.	--	--	--	--	--	--
maker-scaffold10x_1428_pilon-snap-gene-0.7-mRNA-1	A0A4E0RPJ8	A0A4E0RPJ8|A0A4E0RPJ8_FASHE_Maleylacetoacetate_isomerase_MaiA_OS=Fasciola_hepatica_OX=6192_GN=D915_006391_PE=3_SV=1	38.17	46.56	63.81	T0+T5+T10	0	0	0	ND.	--	--	--	--	--	--
maker-scaffold10x_1428_pilon-snap-gene-0.9-mRNA-1	A0A4E0R2P8	A0A4E0R2P8|A0A4E0R2P8_FASHE_Aldose_reductase_B_OS=Fasciola_hepatica_OX=6192_GN=D915_007375_PE=4_SV=1	1.08	1.62	0	T0+T5	0	0	0	ND.	--	-6.08261	-5.37483	--	--	--
maker-scaffold10x_143_pilon-augustus-gene-0.58-mRNA-1	A0A2H1C313	A0A2H1C313|A0A2H1C313_FASHE_Diphosphomevalonate_decarboxylase_OS=Fasciola_hepatica_OX=6192_GN=D915_11928_PE=3_SV=1	14.94	21.19	32.41	T0+T5+T10	0	0	0	ND.	--	--	--	--	--	--
maker-scaffold10x_143_pilon-augustus-gene-0.62-mRNA-1	Q9U1G7	Q9U1G7|Q9U1G7_FASHE_Thioredoxin_OS=Fasciola_hepatica_OX=6192_GN=trx_PE=1_SV=1	8615.67	5493.16	4737.94	T0+T5+T10	8875.9	8613.04	10640.6	T0+T5+T10	-1.05673	-1.54608	--	--	--	--
maker-scaffold10x_143_pilon-snap-gene-0.10-mRNA-1	A0A4E0QZI6	A0A4E0QZI6|A0A4E0QZI6_FASHE_S_phase_cyclin_A-associated_protein_in_the_endoplasmic_reticulum_OS=Fasciola_hepatica_OX=6192_GN=D915_008590_PE=4_SV=1	0.47	0.66	0.34	T0+T5+T10	0	0	0	ND.	--	--	--	--	--	--
maker-scaffold10x_143_pilon-snap-gene-0.11-mRNA-1	A0A4E0RCR9	A0A4E0RCR9|A0A4E0RCR9_FASHE_SDE2_telomere_maintenance_OS=Fasciola_hepatica_OX=6192_GN=D915_003677_PE=4_SV=1	46.63	112.12	189.45	T0+T5+T10	0	0	0	ND.	0.763834	1.07989	--	--	--	--
maker-scaffold10x_143_pilon-snap-gene-0.12-mRNA-1	G7YXB4	G7YXB4|G7YXB4_CLOSI_Protein_NEF1_OS=Clonorchis_sinensis_OX=79923_GN=CLF_112943_PE=4_SV=1	667.97	755.23	1330.51	T0+T5+T10	0	0	0	ND.	--	--	0.578057	--	--	--
maker-scaffold10x_143_pilon-snap-gene-0.14-mRNA-1	A0A4E0S048	A0A4E0S048|A0A4E0S048_FASHE_Eukaryotic_translation_initiation_factor_3_subunit_K_OS=Fasciola_hepatica_OX=6192_GN=D915_006195_PE=3_SV=1	41.6	38.79	42.63	T0+T5+T10	52.33	193.08	152.78	T0+T5+T10	-0.394022	-0.552299	--	--	--	--
maker-scaffold10x_143_pilon-snap-gene-0.15-mRNA-1	A0A4E0S0K1	A0A4E0S0K1|A0A4E0S0K1_FASHE_Tfiif_interacting_ctd_phosphat_OS=Fasciola_hepatica_OX=6192_GN=D915_005332_PE=4_SV=1	116.79	87.76	76.39	T0+T5+T10	0	0	0	ND.	-0.740321	-1.26625	--	--	--	--
maker-scaffold10x_143_pilon-snap-gene-0.16-mRNA-1	A0A4E0REU8	A0A4E0REU8|A0A4E0REU8_FASHE_EH_domain-binding_protein_1_OS=Fasciola_hepatica_OX=6192_GN=D915_003676_PE=4_SV=1	2.17	7.54	15.22	T0+T5+T10	0	0	0	ND.	1.38537	2.13884	0.822018	--	--	--
maker-scaffold10x_143_pilon-snap-gene-0.4-mRNA-1	A0A4E0R391	A0A4E0R391|A0A4E0R391_FASHE_Large_subunit_ribosomal_protein_L34e_OS=Fasciola_hepatica_OX=6192_GN=D915_007713_PE=4_SV=1	912.18	1267.78	2148.72	T0+T5+T10	0	0	0	ND.	--	0.64679	0.615146	--	--	--
maker-scaffold10x_143_pilon-snap-gene-0.5-mRNA-1	A0A5J4NZ26	A0A5J4NZ26|A0A5J4NZ26_9TREM_Obg-like_ATPase_1_OS=Paragonimus_westermani_OX=34504_GN=DEA37_0009648_PE=3_SV=1	46.73	70.97	97.07	T0+T5+T10	62.18	86.22	76.23	T0+T5+T10	--	--	--	--	--	--
maker-scaffold10x_143_pilon-snap-gene-0.7-mRNA-1	A0A4E0RAW5	A0A4E0RAW5|A0A4E0RAW5_FASHE_Ras-specific_guanine_nucleotide-releasing_factor_RalGPS2_OS=Fasciola_hepatica_OX=6192_GN=D915_006196_PE=4_SV=1	1.09	2.22	6.88	T0+T5+T10	0	0	0	ND.	--	2.38044	--	--	--	--
maker-scaffold10x_143_pilon-snap-gene-0.8-mRNA-1	A0A4E0R5A5	A0A4E0R5A5|A0A4E0R5A5_FASHE_Adenylate_kinase_7_OS=Fasciola_hepatica_OX=6192_GN=D915_005331_PE=4_SV=1	12.91	6.57	3.53	T0+T5+T10	0	0	0	ND.	-1.32805	-2.29134	--	--	--	--
maker-scaffold10x_143_pilon-snap-gene-0.9-mRNA-1	A0A504Z4B8	A0A504Z4B8|A0A504Z4B8_FASGI_Isoleucine--tRNA_ligase_OS=Fasciola_gigantica_OX=46835_GN=FGIG_03872_PE=4_SV=1	22.7	19.56	15.5	T0+T5+T10	11.82	49.11	7.68	T0+T5+T10	-0.65868	-1.15988	--	--	--	--
maker-scaffold10x_1433_pilon-pred_gff_StringTie-gene-0.10-mRNA-1	A0A4E0R2C2	A0A4E0R2C2|A0A4E0R2C2_FASHE_Protein_disulfide-isomerase_(Fragment)_OS=Fasciola_hepatica_OX=6192_GN=D915_009020_PE=4_SV=1	9.47	34.67	58.53	T0+T5+T10	0	0	0	ND.	1.8059	2.57858	--	--	--	--
maker-scaffold10x_1435_pilon-augustus-gene-0.27-mRNA-1	A0A4E0R0W5	A0A4E0R0W5|A0A4E0R0W5_FASHE_Mediator_of_RNA_polymerase_II_transcription_subunit_10_OS=Fasciola_hepatica_OX=6192_GN=MED10_PE=3_SV=1	70.1	68.02	67.11	T0+T5+T10	0	0	0	ND.	-0.506286	-0.68405	--	--	--	--
maker-scaffold10x_1435_pilon-snap-gene-0.23-mRNA-1	A0A4E0RN59	A0A4E0RN59|A0A4E0RN59_FASHE_F-box_domain-containing_protein_OS=Fasciola_hepatica_OX=6192_GN=D915_006746_PE=4_SV=1	1.55	1.59	4.92	T0+T5+T10	0	0	0	ND.	--	--	--	--	--	--
maker-scaffold10x_1437_pilon-snap-gene-0.40-mRNA-1	A0A4E0RW59	A0A4E0RW59|A0A4E0RW59_FASHE_Carcinoembryonic_antigen_cell_adhesion_molecule_protein_OS=Fasciola_hepatica_OX=6192_GN=D915_002145_PE=4_SV=1	3.95	13.69	18.58	T0+T5+T10	0	0	0	ND.	--	--	--	--	--	--
maker-scaffold10x_1437_pilon-snap-gene-0.41-mRNA-1	A0A2H1CQT0	A0A2H1CQT0|A0A2H1CQT0_FASHE_ELAV_like_protein_2/3/4_OS=Fasciola_hepatica_OX=6192_GN=D915_002144_PE=4_SV=1	819.77	559.66	405.61	T0+T5+T10	178.4	268.24	248.51	T0+T5+T10	-1.06326	-1.74051	-0.613197	--	--	--
maker-scaffold10x_1437_pilon-snap-gene-0.43-mRNA-1	A0A2H1CIR3	A0A2H1CIR3|A0A2H1CIR3_FASHE_MIT_C_domain-containing_protein_OS=Fasciola_hepatica_OX=6192_GN=D915_16242_PE=4_SV=1	46.18	101.18	110.76	T0+T5+T10	0	0	0	ND.	--	0.502241	--	--	--	--
maker-scaffold10x_1437_pilon-snap-gene-0.44-mRNA-1	A0A2H1CNJ8	A0A2H1CNJ8|A0A2H1CNJ8_FASHE_Proteasome_subunit_alpha_type_OS=Fasciola_hepatica_OX=6192_GN=D915_002141_PE=3_SV=1	158.76	218.11	266.31	T0+T5+T10	290.42	169.81	468.51	T0+T5+T10	--	--	--	--	--	2.27349
maker-scaffold10x_1443_pilon-augustus-gene-0.0-mRNA-1	A0A504YAU4	A0A504YAU4|A0A504YAU4_FASGI_Chibby_1_OS=Fasciola_gigantica_OX=46835_GN=FGIG_05605_PE=4_SV=1	31.09	28	23.75	T0+T5+T10	0	0	0	ND.	-0.68146	-1.0436	--	--	--	--
maker-scaffold10x_1444_pilon-augustus-gene-0.5-mRNA-1	A0A4E0S3R9	A0A4E0S3R9|A0A4E0S3R9_FASHE_Long-chain-fatty-acid--CoA_ligase_OS=Fasciola_hepatica_OX=6192_GN=D915_001275_PE=4_SV=1	1003.59	893.36	556.82	T0+T5+T10	0	0	0	ND.	-0.608819	-1.42959	-0.75591	--	--	--
maker-scaffold10x_1444_pilon-snap-gene-0.37-mRNA-1	A0A4E0R3F4	A0A4E0R3F4|A0A4E0R3F4_FASHE_Long-chain_acyl-CoA_synthetase_OS=Fasciola_hepatica_OX=6192_GN=D915_007043_PE=4_SV=1	63	51.58	44.67	T0+T5+T10	0	0	0	ND.	-0.724691	-1.14694	--	--	--	--
maker-scaffold10x_1444_pilon-snap-gene-0.40-mRNA-1	A0A4E0RIS3	A0A4E0RIS3|A0A4E0RIS3_FASHE_Tubulin_alpha_chain_OS=Fasciola_hepatica_OX=6192_GN=D915_001281_PE=3_SV=1	3.39	6.83	8.12	T0+T5+T10	0	0	0	ND.	--	--	--	--	--	--
maker-scaffold10x_1444_pilon-snap-gene-0.42-mRNA-1	A0A4E0RQE0	A0A4E0RQE0|A0A4E0RQE0_FASHE_Transporter_OS=Fasciola_hepatica_OX=6192_GN=D915_001279_PE=3_SV=1	0.12	0	0	T0	0	0	0	ND.	--	--	--	--	--	--
maker-scaffold10x_1444_pilon-snap-gene-0.43-mRNA-1	A0A504YJC6	A0A504YJC6|A0A504YJC6_FASGI_Tyrosine-protein_kinase_OS=Fasciola_gigantica_OX=46835_GN=FGIG_01273_PE=3_SV=1	0	0.76	2.29	T5+T10	0	0	0	ND.	--	6.3562	--	--	--	--
maker-scaffold10x_1445_pilon-augustus-gene-0.4-mRNA-1	A0A4E0R737	A0A4E0R737|A0A4E0R737_FASHE_V-type_proton_ATPase_subunit_OS=Fasciola_hepatica_OX=6192_GN=D915_006459_PE=3_SV=1	156.75	193.05	221.83	T0+T5+T10	0	20.34	0	T5	--	--	--	--	--	--
maker-scaffold10x_1445_pilon-snap-gene-0.62-mRNA-1	A0A4E0R1T2	A0A4E0R1T2|A0A4E0R1T2_FASHE_Mitochondrial_hydroxyacyl-coenzyme_a_dehydrogenase_OS=Fasciola_hepatica_OX=6192_GN=D915_008115_PE=4_SV=1	18.25	26.75	34.38	T0+T5+T10	0	0	0	ND.	--	--	--	--	--	--
maker-scaffold10x_1445_pilon-snap-gene-0.63-mRNA-1	A0A4E0R5Y1	A0A4E0R5Y1|A0A4E0R5Y1_FASHE_RhoGAP_OS=Fasciola_hepatica_OX=6192_GN=D915_005491_PE=4_SV=1	28.61	17.52	16.43	T0+T5+T10	0	0	0	ND.	-0.98144	-1.37702	--	--	--	--
maker-scaffold10x_1445_pilon-snap-gene-0.64-mRNA-1	A0A2H1BRT5	A0A2H1BRT5|A0A2H1BRT5_FASHE_Protein_kinase_domain-containing_protein_(Fragment)_OS=Fasciola_hepatica_OX=6192_GN=D915_15809_PE=4_SV=1	57.46	52.53	52.27	T0+T5+T10	0	0	0	ND.	--	-0.883989	--	--	--	--
maker-scaffold10x_1445_pilon-snap-gene-0.65-mRNA-1	A0A2H1CBB6	A0A2H1CBB6|A0A2H1CBB6_FASHE_U4/U6,U5_tri-snRNP-associated_protein_2_OS=Fasciola_hepatica_OX=6192_GN=D915_005080_PE=4_SV=1	10.96	15.21	18.58	T0+T5+T10	0	0	0	ND.	--	--	--	--	--	--
maker-scaffold10x_1445_pilon-snap-gene-0.69-mRNA-1	A0A4E0R4Q8	A0A4E0R4Q8|A0A4E0R4Q8_FASHE_Calreticulin_OS=Fasciola_hepatica_OX=6192_GN=D915_008114_PE=3_SV=1	121.31	165.64	226.21	T0+T5+T10	1902.59	2184.59	1639.45	T0+T5+T10	--	--	--	--	--	--
maker-scaffold10x_1445_pilon-snap-gene-0.70-mRNA-1	A0A504YAF8	A0A504YAF8|A0A504YAF8_FASGI_Cytoplasmic_dynein_intermediate_chain_OS=Fasciola_gigantica_OX=46835_GN=FGIG_06562_PE=4_SV=1	6.37	7.25	6.64	T0+T5+T10	0	11.73	0	T5	--	--	--	--	--	--
maker-scaffold10x_1445_pilon-snap-gene-0.71-mRNA-1	A0A4E0RM67	A0A4E0RM67|A0A4E0RM67_FASHE_Forkhead_box_protein_J1-B_OS=Fasciola_hepatica_OX=6192_GN=D915_000601_PE=4_SV=1	0.08	0	0.12	T0+T10	0	0	0	ND.	--	--	--	--	--	--
maker-scaffold10x_1445_pilon-snap-gene-0.72-mRNA-1	A0A4E0RPY4	A0A4E0RPY4|A0A4E0RPY4_FASHE_GCUNC-45_OS=Fasciola_hepatica_OX=6192_GN=D915_006460_PE=4_SV=1	8.4	9.89	13.07	T0+T5+T10	0	0	0	ND.	--	--	--	--	--	--
maker-scaffold10x_1446_pilon-augustus-gene-0.70-mRNA-1	Q5DB29	Q5DB29|Q5DB29_SCHJA_SJCHGC01845_protein_OS=Schistosoma_japonicum_OX=6182_GN=EWB00_006834_PE=2_SV=1	0.56	0	0	T0	0	0	0	ND.	--	--	--	--	--	--
maker-scaffold10x_1446_pilon-pred_gff_StringTie-gene-0.3-mRNA-1	A0A2H1C6Q6	A0A2H1C6Q6|A0A2H1C6Q6_FASHE_7_transmembrane_receptor_OS=Fasciola_hepatica_OX=6192_GN=D915_006620_PE=4_SV=1	0.17	0.15	0.02	T0+T5+T10	0	0	0	ND.	--	-4.28883	--	--	--	--
maker-scaffold10x_1446_pilon-snap-gene-0.31-mRNA-1	A0A2H1CU94	A0A2H1CU94|A0A2H1CU94_FASHE_Fzo-like_region_OS=Fasciola_hepatica_OX=6192_GN=D915_02203_PE=3_SV=1	37.53	68.8	76.76	T0+T5+T10	0	0	0	ND.	--	--	--	--	--	--
maker-scaffold10x_1446_pilon-snap-gene-0.32-mRNA-1	A0A4E0R1S0	A0A4E0R1S0|A0A4E0R1S0_FASHE_PKC-activated_phosphatase-1_inhibitor_OS=Fasciola_hepatica_OX=6192_GN=D915_008852_PE=4_SV=1	1652.21	1327.22	861.05	T0+T5+T10	0	0	0	ND.	-0.781073	-1.48375	--	--	--	--
maker-scaffold10x_1446_pilon-snap-gene-0.34-mRNA-1	no hit	no hit	1.73	1.44	0.89	T0+T5+T10	0	0	0	ND.	--	--	--	--	--	--
maker-scaffold10x_1446_pilon-snap-gene-0.35-mRNA-1	A0A4E0RX36	A0A4E0RX36|A0A4E0RX36_FASHE_LisH_domain-containing_protein_OS=Fasciola_hepatica_OX=6192_GN=D915_001451_PE=4_SV=1	1.01	2.84	4.19	T0+T5+T10	0	0	0	ND.	--	1.78027	--	--	--	--
maker-scaffold10x_1446_pilon-snap-gene-0.36-mRNA-1	A0A4E0S0B5	A0A4E0S0B5|A0A4E0S0B5_FASHE_FCH_domain_only_protein_2_OS=Fasciola_hepatica_OX=6192_GN=D915_003796_PE=4_SV=1	6.58	18.21	20.89	T0+T5+T10	0	0	0	ND.	0.833121	0.994265	--	--	--	--
maker-scaffold10x_1446_pilon-snap-gene-0.37-mRNA-1	A0A4E0RY72	A0A4E0RY72|A0A4E0RY72_FASHE_Cyclin-dependent_kinase_18_OS=Fasciola_hepatica_OX=6192_GN=D915_005773_PE=4_SV=1	0	0.58	1.27	T5+T10	0	0	0	ND.	--	--	--	--	--	--
maker-scaffold10x_1446_pilon-snap-gene-0.38-mRNA-1	A0A504YQL9	A0A504YQL9|A0A504YQL9_FASGI_General_transcription_factor_3C_polypeptide_1_OS=Fasciola_gigantica_OX=46835_GN=FGIG_04471_PE=4_SV=1	9.77	13.94	22.06	T0+T5+T10	0	0	0	ND.	--	--	--	--	--	--
maker-scaffold10x_1446_pilon-snap-gene-0.39-mRNA-1	A0A4E0RPN3	A0A4E0RPN3|A0A4E0RPN3_FASHE_Actin_protein_10_OS=Fasciola_hepatica_OX=6192_GN=D915_010418_PE=3_SV=1	23.94	18.73	29.24	T0+T5+T10	0	0	0	ND.	-0.918589	--	--	--	--	--
maker-scaffold10x_1449_pilon-augustus-gene-0.7-mRNA-1	A0A4E0RPW9	A0A4E0RPW9|A0A4E0RPW9_FASHE_WD_REPEATS_REGION_domain-containing_protein_OS=Fasciola_hepatica_OX=6192_GN=D915_005970_PE=4_SV=1	15.14	22.5	27.98	T0+T5+T10	0	0	0	ND.	--	--	--	--	--	--
maker-scaffold10x_1449_pilon-snap-gene-0.6-mRNA-1	A0A504Z8G8	A0A504Z8G8|A0A504Z8G8_FASGI_GTP_binding_protein_alpha_subunit_Gq_OS=Fasciola_gigantica_OX=46835_GN=FGIG_04424_PE=4_SV=1	29.44	11.93	9.83	T0+T5+T10	132.65	170.53	98.38	T0+T5+T10	--	-1.96652	--	--	--	--
maker-scaffold10x_145_pilon-augustus-gene-0.102-mRNA-1	A0A074ZTY3	A0A074ZTY3|A0A074ZTY3_9TREM_SH2_domain-containing_protein_OS=Opisthorchis_viverrini_OX=6198_GN=T265_05987_PE=4_SV=1	0.18	0.08	0.09	T0+T5+T10	0	0	0	ND.	--	--	--	--	--	--
maker-scaffold10x_145_pilon-augustus-gene-0.103-mRNA-1	A0A4E0RJ05	A0A4E0RJ05|A0A4E0RJ05_FASHE_Calcium-binding_mitochondrial_carrier_protein_SCaMC-1_OS=Fasciola_hepatica_OX=6192_GN=D915_007806_PE=3_SV=1	209.25	287.5	234.41	T0+T5+T10	0	0	0	ND.	--	-0.55138	--	--	--	--
maker-scaffold10x_145_pilon-augustus-gene-0.95-mRNA-1	A0A504YPA2	A0A504YPA2|A0A504YPA2_FASGI_Lysine_specific_demethylase_5B_OS=Fasciola_gigantica_OX=46835_GN=FGIG_08293_PE=4_SV=1	5.67	13.02	22.36	T0+T5+T10	0	0	0	ND.	--	1.07855	--	--	--	--
maker-scaffold10x_145_pilon-augustus-gene-0.98-mRNA-1	A0A074ZVF4	A0A074ZVF4|A0A074ZVF4_9TREM_Reverse_transcriptase_domain-containing_protein_(Fragment)_OS=Opisthorchis_viverrini_OX=6198_GN=T265_13820_PE=4_SV=1	0.84	1.28	0.46	T0+T5+T10	0	0	0	ND.	--	--	--	--	--	--
maker-scaffold10x_145_pilon-augustus-gene-1.24-mRNA-1	A0A4E0RSD6	A0A4E0RSD6|A0A4E0RSD6_FASHE_Mediator_of_RNA_polymerase_II_transcription_subunit_OS=Fasciola_hepatica_OX=6192_GN=D915_005352_PE=4_SV=1	13.83	16.01	19.4	T0+T5+T10	0	0	0	ND.	--	--	--	--	--	--
maker-scaffold10x_145_pilon-augustus-gene-1.29-mRNA-1	A0A2H1CEX0	A0A2H1CEX0|A0A2H1CEX0_FASHE_Guanylate_cyclase_domain-containing_protein_OS=Fasciola_hepatica_OX=6192_GN=D915_06705_PE=4_SV=1	2.77	3.46	5.22	T0+T5+T10	0	0	0	ND.	--	--	--	--	--	--
maker-scaffold10x_145_pilon-augustus-gene-2.246-mRNA-1	A0A4E0RI03	A0A4E0RI03|A0A4E0RI03_FASHE_Eukaryotic_translation_initiation_factor_2c_OS=Fasciola_hepatica_OX=6192_GN=D915_003014_PE=3_SV=1	10.45	17.59	23.27	T0+T5+T10	0	0	0	ND.	--	--	--	--	--	--
maker-scaffold10x_145_pilon-augustus-gene-2.257-mRNA-1	A0A504YFQ3	A0A504YFQ3|A0A504YFQ3_FASGI_EF-hand_domain-containing_protein_OS=Fasciola_gigantica_OX=46835_GN=FGIG_09640_PE=4_SV=1	1.87	9.53	10.99	T0+T5+T10	0	0	0	ND.	2.00182	1.71585	--	--	--	--
maker-scaffold10x_145_pilon-augustus-gene-2.262-mRNA-1	A0A183A608	A0A183A608|A0A183A608_9TREM_C2_domain-containing_protein_OS=Echinostoma_caproni_OX=27848_GN=ECPE_LOCUS2393_PE=4_SV=1	0	0	0.05	T10	0	0	0	ND.	--	--	--	--	--	--
maker-scaffold10x_145_pilon-augustus-gene-2.264-mRNA-1	A0A2H1CP88	A0A2H1CP88|A0A2H1CP88_FASHE_Tetratricopeptide_repeat_protein_OS=Fasciola_hepatica_OX=6192_GN=D915_002109_PE=4_SV=1	0.47	0.33	1.7	T0+T5+T10	0	0	0	ND.	--	--	--	--	--	--
maker-scaffold10x_145_pilon-augustus-gene-2.267-mRNA-1	A0A504YLC3	A0A504YLC3|A0A504YLC3_FASGI_tRNA-intron_endonuclease_OS=Fasciola_gigantica_OX=46835_GN=FGIG_00761_PE=4_SV=1	48.29	29.42	25.61	T0+T5+T10	0	0	0	ND.	-1.00713	-1.58969	--	--	--	--
maker-scaffold10x_145_pilon-augustus-gene-2.273-mRNA-1	A0A4E0R3Z0	A0A4E0R3Z0|A0A4E0R3Z0_FASHE_Transgelin_OS=Fasciola_hepatica_OX=6192_GN=D915_006998_PE=3_SV=1	0.17	0.46	1.19	T0+T5+T10	0	0	0	ND.	--	--	--	--	--	--
maker-scaffold10x_145_pilon-augustus-gene-2.279-mRNA-1	no hit	no hit	0	0	1.39	T10	0	0	0	ND.	--	5.54208	--	--	--	--
maker-scaffold10x_145_pilon-augustus-gene-2.282-mRNA-1	A0A1S8X3N7	A0A1S8X3N7|A0A1S8X3N7_9TREM_AAR2_protein_OS=Opisthorchis_viverrini_OX=6198_GN=X801_02816_PE=4_SV=1	15.48	17.66	28.14	T0+T5+T10	0	0	0	ND.	--	--	--	--	--	--
maker-scaffold10x_145_pilon-augustus-gene-2.284-mRNA-1	A0A4E0REC5	A0A4E0REC5|A0A4E0REC5_FASHE_RICTOR_N_domain-containing_protein_OS=Fasciola_hepatica_OX=6192_GN=D915_009215_PE=4_SV=1	0.55	1.78	5.4	T0+T5+T10	0	0	0	ND.	1.76128	2.64997	0.959099	--	--	--
maker-scaffold10x_145_pilon-pred_gff_StringTie-gene-0.49-mRNA-1	no hit	no hit	3.93	4.59	7.53	T0+T5+T10	0	0	0	ND.	--	--	--	--	--	--
maker-scaffold10x_145_pilon-pred_gff_StringTie-gene-2.13-mRNA-1	A0A504YSM3	A0A504YSM3|A0A504YSM3_FASGI_Retrovirus_Pol_polyprotein_from_type-2_retrotransposable_element_R2DM_OS=Fasciola_gigantica_OX=46835_GN=FGIG_09203_PE=4_SV=1	4.72	8.06	9.36	T0+T5+T10	0	0	0	ND.	--	--	--	--	--	--
maker-scaffold10x_145_pilon-pred_gff_StringTie-gene-2.18-mRNA-1	no hit	no hit	0.4	0	0	T0	0	0	0	ND.	--	--	--	--	--	--
maker-scaffold10x_145_pilon-snap-gene-0.10-mRNA-1	A0A2H1CFV8	A0A2H1CFV8|A0A2H1CFV8_FASHE_Ferritin_OS=Fasciola_hepatica_OX=6192_GN=D915_004003_PE=3_SV=1	6142.7	3097.23	2336.14	T0+T5+T10	4246.05	4836.01	7334.22	T0+T5+T10	-1.45157	-2.04074	--	--	--	--
maker-scaffold10x_145_pilon-snap-gene-0.11-mRNA-1	A0A4E0QXC4	A0A4E0QXC4|A0A4E0QXC4_FASHE_DAD_domain-containing_protein_OS=Fasciola_hepatica_OX=6192_GN=D915_009505_PE=4_SV=1	1.58	4.48	1.65	T0+T5+T10	0	0	0	ND.	--	--	--	--	--	--
maker-scaffold10x_145_pilon-snap-gene-0.12-mRNA-1	G7Y6V5	G7Y6V5|G7Y6V5_CLOSI_AAC-rich_mRNA_clone_AAC4_protein_OS=Clonorchis_sinensis_OX=79923_GN=CLF_101919_PE=4_SV=1	0.64	1.46	0	T0+T5	0	0	0	ND.	--	--	--	--	--	--
maker-scaffold10x_145_pilon-snap-gene-0.13-mRNA-1	A0A4E0RS63	A0A4E0RS63|A0A4E0RS63_FASHE_Ig-like_domain-containing_protein_OS=Fasciola_hepatica_OX=6192_GN=D915_000105_PE=4_SV=1	75.42	54.52	30.6	T0+T5+T10	0	0	0	ND.	-0.851615	-1.98919	-1.07617	--	--	--
maker-scaffold10x_145_pilon-snap-gene-0.14-mRNA-1	A0A4E0R8X6	A0A4E0R8X6|A0A4E0R8X6_FASHE_Carbonic_anhydrase_OS=Fasciola_hepatica_OX=6192_GN=D915_006810_PE=3_SV=1	738.12	498.42	355.89	T0+T5+T10	1640.45	2057.23	2185.82	T0+T5+T10	-1.13255	-1.79047	-0.593647	--	--	--
maker-scaffold10x_145_pilon-snap-gene-0.18-mRNA-1	A0A4E0REH0	A0A4E0REH0|A0A4E0REH0_FASHE_BUB1_N-terminal_domain-containing_protein_OS=Fasciola_hepatica_OX=6192_GN=D915_004004_PE=4_SV=1	4.86	9.46	10.53	T0+T5+T10	0	0	0	ND.	--	--	--	--	--	--
maker-scaffold10x_145_pilon-snap-gene-0.19-mRNA-1	G7Y7Z6	G7Y7Z6|G7Y7Z6_CLOSI_Spindle_assembly_checkpoint_component_OS=Clonorchis_sinensis_OX=79923_GN=CLF_102459_PE=4_SV=1	4.29	3.91	9.47	T0+T5+T10	0	0	0	ND.	--	--	--	--	--	--
maker-scaffold10x_145_pilon-snap-gene-0.20-mRNA-1	A0A4E0RI83	A0A4E0RI83|A0A4E0RI83_FASHE_Neuroendocrine_convertase_OS=Fasciola_hepatica_OX=6192_GN=D915_001944_PE=3_SV=1	0.39	4.81	14.44	T0+T5+T10	0	0	0	ND.	3.60503	4.29968	--	--	--	--
maker-scaffold10x_145_pilon-snap-gene-0.8-mRNA-1	A0A4E0RVD8	A0A4E0RVD8|A0A4E0RVD8_FASHE_ANK_REP_REGION_domain-containing_protein_OS=Fasciola_hepatica_OX=6192_GN=D915_002811_PE=4_SV=1	3.3	8.39	9.4	T0+T5+T10	0	0	0	ND.	1.0029	0.899648	--	--	--	--
maker-scaffold10x_145_pilon-snap-gene-1.3-mRNA-1	A0A183AE10	A0A183AE10|A0A183AE10_9TREM_C2_domain-containing_protein_OS=Echinostoma_caproni_OX=27848_PE=4_SV=1	0.96	1.13	1.4	T0+T5+T10	0	0	0	ND.	--	--	--	--	--	--
maker-scaffold10x_145_pilon-snap-gene-1.4-mRNA-1	A0A504YVJ8	A0A504YVJ8|A0A504YVJ8_FASGI_NADH:ubiquinone_oxidoreductase_complex_assembly_factor_5_OS=Fasciola_gigantica_OX=46835_GN=FGIG_10345_PE=4_SV=1	8.64	31.55	44.53	T0+T5+T10	0	0	0	ND.	1.5485	1.89271	--	--	--	--
maker-scaffold10x_145_pilon-snap-gene-1.6-mRNA-1	no hit	no hit	9.17	8.32	6.78	T0+T5+T10	0	0	0	ND.	-0.583853	-1.12917	--	--	--	--
maker-scaffold10x_145_pilon-snap-gene-2.161-mRNA-1	A0A4E0RWL4	A0A4E0RWL4|A0A4E0RWL4_FASHE_Putative_spindle_pole_body_protein_OS=Fasciola_hepatica_OX=6192_GN=D915_006997_PE=4_SV=1	275.94	254.44	213.61	T0+T5+T10	338.04	360.39	283.45	T0+T5+T10	-0.523711	-0.984617	--	--	--	--
maker-scaffold10x_145_pilon-snap-gene-2.163-mRNA-1	A0A4E0RJ59	A0A4E0RJ59|A0A4E0RJ59_FASHE_Cell_polarity_protein_PAR6_OS=Fasciola_hepatica_OX=6192_GN=D915_007864_PE=4_SV=1	45.94	66.87	56.86	T0+T5+T10	0	0	0	ND.	--	--	--	--	--	--
maker-scaffold10x_145_pilon-snap-gene-2.164-mRNA-1	A0A504YEM7	A0A504YEM7|A0A504YEM7_FASGI_Biotin-protein_ligase_OS=Fasciola_gigantica_OX=46835_GN=FGIG_07862_PE=4_SV=1	25.23	44.26	53.51	T0+T5+T10	0	0	0	ND.	--	--	--	--	--	--
maker-scaffold10x_145_pilon-snap-gene-2.165-mRNA-1	A0A4E0RH85	A0A4E0RH85|A0A4E0RH85_FASHE_Dynein_heavy_chain_5_axonemal_OS=Fasciola_hepatica_OX=6192_GN=D915_002577_PE=4_SV=1	0.03	0.03	0	T0+T5	0	0	0	ND.	--	--	--	--	--	--
maker-scaffold10x_145_pilon-snap-gene-2.167-mRNA-1	A0A4E0QZ35	A0A4E0QZ35|A0A4E0QZ35_FASHE_PHD_finger_domain-containing_protein_5A_OS=Fasciola_hepatica_OX=6192_GN=D915_010677_PE=4_SV=1	232.34	207.45	302.73	T0+T5+T10	0	0	0	ND.	--	--	--	--	--	--
maker-scaffold10x_145_pilon-snap-gene-2.168-mRNA-1	A0A4E0R074	A0A4E0R074|A0A4E0R074_FASHE_Leukocyte_receptor_cluster_member_1_OS=Fasciola_hepatica_OX=6192_GN=D915_008373_PE=4_SV=1	2.83	3.62	5.08	T0+T5+T10	0	0	0	ND.	--	--	--	--	--	--
maker-scaffold10x_145_pilon-snap-gene-2.169-mRNA-1	A0A4E0RE77	A0A4E0RE77|A0A4E0RE77_FASHE_NAD_kinase_2_mitochondrial_OS=Fasciola_hepatica_OX=6192_GN=D915_003760_PE=4_SV=1	73.81	140.72	187.74	T0+T5+T10	0	0	0	ND.	--	0.53079	--	--	--	--
maker-scaffold10x_145_pilon-snap-gene-2.174-mRNA-1	A0A4E0S0N5	A0A4E0S0N5|A0A4E0S0N5_FASHE_Ribosome_production_factor_OS=Fasciola_hepatica_OX=6192_GN=D915_005600_PE=4_SV=1	77.57	116.9	117.25	T0+T5+T10	0	0	0	ND.	--	--	--	--	--	--
maker-scaffold10x_145_pilon-snap-gene-2.175-mRNA-1	A0A2H1C401	A0A2H1C401|A0A2H1C401_FASHE_Leucine_Rich_repeat-containing_domain_protein_(Fragment)_OS=Fasciola_hepatica_OX=6192_GN=D915_10886_PE=4_SV=1	3.61	3.32	2.73	T0+T5+T10	0	0	0	ND.	--	-1.0296	--	--	--	--
maker-scaffold10x_145_pilon-snap-gene-2.176-mRNA-1	A0A504Y7R9	A0A504Y7R9|A0A504Y7R9_FASGI_Calcium-transporting_ATPase_type_2C_member_1_OS=Fasciola_gigantica_OX=46835_GN=FGIG_07980_PE=3_SV=1	0.16	0	0	T0	0	0	0	ND.	--	-5.91757	--	--	--	--
maker-scaffold10x_145_pilon-snap-gene-2.177-mRNA-1	A0A504YV41	A0A504YV41|A0A504YV41_FASGI_F-box_domain-containing_protein_OS=Fasciola_gigantica_OX=46835_GN=FGIG_07068_PE=4_SV=1	15.19	14.69	12.24	T0+T5+T10	0	0	0	ND.	--	-0.879828	--	--	--	--
maker-scaffold10x_145_pilon-snap-gene-2.181-mRNA-1	A0A4E0R2X6	A0A4E0R2X6|A0A4E0R2X6_FASHE_Nuclear_transport_factor_2_OS=Fasciola_hepatica_OX=6192_GN=D915_007444_PE=4_SV=1	158.06	165.67	214.05	T0+T5+T10	0	0	0	ND.	--	--	--	--	--	--
maker-scaffold10x_145_pilon-snap-gene-2.182-mRNA-1	A0A4E0REJ8	A0A4E0REJ8|A0A4E0REJ8_FASHE_Intraflagellar_transport_protein_74_OS=Fasciola_hepatica_OX=6192_GN=D915_004492_PE=4_SV=1	18.53	17.59	10.42	T0+T5+T10	0	0	0	ND.	--	-1.41528	--	--	--	--
maker-scaffold10x_145_pilon-snap-gene-2.185-mRNA-1	A0A4E0S190	A0A4E0S190|A0A4E0S190_FASHE_Phospholipid-transporting_ATPase_OS=Fasciola_hepatica_OX=6192_GN=D915_003015_PE=4_SV=1	0.03	0	0.18	T0+T10	0	0	0	ND.	--	--	--	--	--	--
maker-scaffold10x_145_pilon-snap-gene-2.186-mRNA-1	A0A4E0RF73	A0A4E0RF73|A0A4E0RF73_FASHE_Alkylated_DNA_repair_protein_alkB_1_OS=Fasciola_hepatica_OX=6192_GN=D915_003016_PE=4_SV=1	17.89	38.83	47.07	T0+T5+T10	0	0	0	ND.	--	0.719321	--	--	--	--
maker-scaffold10x_145_pilon-snap-gene-2.188-mRNA-1	A0A4E0R8A8	A0A4E0R8A8|A0A4E0R8A8_FASHE_Alkyl_transferase_OS=Fasciola_hepatica_OX=6192_GN=D915_006859_PE=3_SV=1	3.77	6.75	8.67	T0+T5+T10	0	0	0	ND.	--	0.856367	--	--	--	--
maker-scaffold10x_145_pilon-snap-gene-2.190-mRNA-1	A0A504Y5P2	A0A504Y5P2|A0A504Y5P2_FASGI_DNA_mismatch_repair_protein_Msh2_OS=Fasciola_gigantica_OX=46835_GN=FGIG_02274_PE=3_SV=1	20.7	42.31	60.87	T0+T5+T10	0	0	0	ND.	--	0.653493	--	--	--	--
maker-scaffold10x_145_pilon-snap-gene-2.193-mRNA-1	A0A4E0R6T3	A0A4E0R6T3|A0A4E0R6T3_FASHE_Protein_CASC3_OS=Fasciola_hepatica_OX=6192_GN=D915_005307_PE=4_SV=1	3.67	6.52	5.25	T0+T5+T10	0	0	0	ND.	--	--	--	--	--	--
maker-scaffold10x_145_pilon-snap-gene-2.200-mRNA-1	A0A2H1CFA0	A0A2H1CFA0|A0A2H1CFA0_FASHE_H/ACA_ribonucleoprotein_complex_subunit_OS=Fasciola_hepatica_OX=6192_GN=D915_06600_PE=3_SV=1	0.3	0.08	0.1	T0+T5+T10	0	0	0	ND.	--	--	--	--	--	--
maker-scaffold10x_145_pilon-snap-gene-2.203-mRNA-1	A0A504YEY1	A0A504YEY1|A0A504YEY1_FASGI_Transcription_elongation_factor_S-II_OS=Fasciola_gigantica_OX=46835_GN=FGIG_08593_PE=4_SV=1	60.19	87.46	93.4	T0+T5+T10	0	54.17	0	T5	--	--	--	--	--	--
maker-scaffold10x_145_pilon-snap-gene-2.204-mRNA-1	no hit	no hit	0.94	0.91	0.63	T0+T5+T10	0	0	0	ND.	--	--	--	--	--	--
maker-scaffold10x_1450_pilon-augustus-gene-0.48-mRNA-1	A0A2H1CQA1	A0A2H1CQA1|A0A2H1CQA1_FASHE_RhoGAP_domain_protein_OS=Fasciola_hepatica_OX=6192_GN=D915_001999_PE=4_SV=1	0	6.93	14.78	T5+T10	0	0	0	ND.	6.48321	7.38151	--	--	--	--
maker-scaffold10x_1450_pilon-snap-gene-0.10-mRNA-1	A0A4E0RW61	A0A4E0RW61|A0A4E0RW61_FASHE_Short_branched_chain_specific_acyl-mitochondrial_OS=Fasciola_hepatica_OX=6192_GN=D915_010044_PE=3_SV=1	3.48	4.24	9.54	T0+T5+T10	0	0	0	ND.	--	0.763498	0.941061	--	--	--
maker-scaffold10x_1450_pilon-snap-gene-0.11-mRNA-1	A0A183AMJ5	A0A183AMJ5|A0A183AMJ5_9TREM_C3H1-type_domain-containing_protein_OS=Echinostoma_caproni_OX=27848_GN=ECPE_LOCUS8180_PE=4_SV=1	5.05	4.38	10.06	T0+T5+T10	0	0	0	ND.	--	--	--	--	--	--
maker-scaffold10x_1450_pilon-snap-gene-0.12-mRNA-1	no hit	no hit	0.08	2.07	5.93	T0+T5+T10	0	0	0	ND.	--	4.36493	--	--	--	--
maker-scaffold10x_1450_pilon-snap-gene-0.13-mRNA-1	A0A4E0R3B1	A0A4E0R3B1|A0A4E0R3B1_FASHE_Suppression_of_tumorigenicity_OS=Fasciola_hepatica_OX=6192_GN=D915_007387_PE=4_SV=1	0.55	0	0	T0	0	0	0	ND.	--	--	--	--	--	--
maker-scaffold10x_1450_pilon-snap-gene-0.14-mRNA-1	A0A1S8XB53	A0A1S8XB53|A0A1S8XB53_9TREM_MPPN_domain_protein_OS=Opisthorchis_viverrini_OX=6198_GN=X801_00131_PE=4_SV=1	2.28	4.33	12.04	T0+T5+T10	0	0	0	ND.	--	--	--	--	--	--
maker-scaffold10x_1450_pilon-snap-gene-0.15-mRNA-1	A0A504YRV8	A0A504YRV8|A0A504YRV8_FASGI_Carbamoyl-phosphate_synthetase_(Glutamine-hydrolysing)_OS=Fasciola_gigantica_OX=46835_GN=FGIG_07204_PE=3_SV=1	0.08	0.02	0.07	T0+T5+T10	22.52	49.03	15.17	T0+T5+T10	--	--	--	--	--	--
maker-scaffold10x_1452_pilon-augustus-gene-0.11-mRNA-1	A0A4E0R6W9	A0A4E0R6W9|A0A4E0R6W9_FASHE_Proteasome_subunit_beta_OS=Fasciola_hepatica_OX=6192_GN=D915_005987_PE=3_SV=1	110.44	121.62	271.71	T0+T5+T10	0	107.54	84.29	T5+T10	--	0.57777	0.807481	--	--	--
maker-scaffold10x_1452_pilon-snap-gene-0.9-mRNA-1	A0A3R7JUL2	A0A3R7JUL2|A0A3R7JUL2_CLOSI_Nodal_modulator_2_OS=Clonorchis_sinensis_OX=79923_GN=NOMO2_PE=4_SV=1	4.46	7.07	8.94	T0+T5+T10	0	0	0	ND.	--	--	--	--	--	--
maker-scaffold10x_1453_pilon-augustus-gene-0.57-mRNA-1	A0A4E0RXQ6	A0A4E0RXQ6|A0A4E0RXQ6_FASHE_LAG1_longevity_assurance_1_OS=Fasciola_hepatica_OX=6192_GN=D915_000878_PE=4_SV=1	116.29	127.97	105.25	T0+T5+T10	0	0	0	ND.	--	-0.794444	--	--	--	--
maker-scaffold10x_1453_pilon-augustus-gene-0.58-mRNA-1	A0A4E0RBV3	A0A4E0RBV3|A0A4E0RBV3_FASHE_GDP-D-glucose_phosphorylase_1_OS=Fasciola_hepatica_OX=6192_GN=D915_010357_PE=4_SV=1	14.81	28.96	35.84	T0+T5+T10	0	0	0	ND.	0.555441	0.684477	--	--	--	--
maker-scaffold10x_1453_pilon-augustus-gene-0.59-mRNA-1	A0A4E0R8G1	A0A4E0R8G1|A0A4E0R8G1_FASHE_Peptidylprolyl_isomerase_OS=Fasciola_hepatica_OX=6192_GN=D915_006040_PE=4_SV=1	27.5	41.96	42.12	T0+T5+T10	0	0	0	ND.	--	--	--	--	--	--
maker-scaffold10x_1453_pilon-snap-gene-0.12-mRNA-1	A0A4E0RJ90	A0A4E0RJ90|A0A4E0RJ90_FASHE_Sh3-containing_grb2_protein_1_(Endophilin_II)_OS=Fasciola_hepatica_OX=6192_GN=D915_000876_PE=4_SV=1	52.95	31.46	27.21	T0+T5+T10	0	61.06	0	T5	-1.10833	-1.65288	--	3.33679	--	-4.03894
maker-scaffold10x_1453_pilon-snap-gene-0.14-mRNA-1	A0A023JCY2	A0A023JCY2|A0A023JCY2_9TREM_Taurocyamine_kinase_OS=Fasciola_sp,_TA-2014_OX=1454228_PE=2_SV=1	2.33	6.3	7.57	T0+T5+T10	0	0	0	ND.	1.2671	1.37565	--	--	--	--
maker-scaffold10x_1453_pilon-snap-gene-0.15-mRNA-1	A0A4E0R2K4	A0A4E0R2K4|A0A4E0R2K4_FASHE_Ubiquitin_carboxyl-terminal_hydrolase_OS=Fasciola_hepatica_OX=6192_GN=D915_007511_PE=3_SV=1	0.51	0.9	0.34	T0+T5+T10	0	0	0	ND.	--	--	--	--	--	--
maker-scaffold10x_1453_pilon-snap-gene-0.16-mRNA-1	A0A4E0RUV9	A0A4E0RUV9|A0A4E0RUV9_FASHE_Putative_ATP-dependent_RNA_helicase_YTHDC2_OS=Fasciola_hepatica_OX=6192_GN=D915_008231_PE=4_SV=1	0.48	0	0	T0	0	0	0	ND.	--	--	--	--	--	--
maker-scaffold10x_1453_pilon-snap-gene-0.17-mRNA-1	A0A4E0RUV9	A0A4E0RUV9|A0A4E0RUV9_FASHE_Putative_ATP-dependent_RNA_helicase_YTHDC2_OS=Fasciola_hepatica_OX=6192_GN=D915_008231_PE=4_SV=1	0.35	0	0	T0	0	0	0	ND.	--	--	--	--	--	--
maker-scaffold10x_1453_pilon-snap-gene-0.18-mRNA-1	A0A4E0R8Q5	A0A4E0R8Q5|A0A4E0R8Q5_FASHE_Putative_ATP-dependent_RNA_helicase_YTHDC2_OS=Fasciola_hepatica_OX=6192_GN=D915_006039_PE=4_SV=1	11.38	6.35	2.91	T0+T5+T10	0	0	0	ND.	-1.1515	-2.16947	--	--	--	--
maker-scaffold10x_1453_pilon-snap-gene-0.19-mRNA-1	A0A4E0R8G1	A0A4E0R8G1|A0A4E0R8G1_FASHE_Peptidylprolyl_isomerase_OS=Fasciola_hepatica_OX=6192_GN=D915_006040_PE=4_SV=1	0.09	0	0	T0	0	31.25	0	T5	--	--	--	--	--	-2.91267
maker-scaffold10x_1458_pilon-augustus-gene-0.2-mRNA-1	A0A504YR62	A0A504YR62|A0A504YR62_FASGI_Plastin-1_OS=Fasciola_gigantica_OX=46835_GN=FGIG_08553_PE=4_SV=1	0	0	0	ND.	634.02	178.07	463.73	T0+T5+T10	--	--	--	--	--	1.65548
maker-scaffold10x_1458_pilon-augustus-gene-0.7-mRNA-1	A0A4E0RYD8	A0A4E0RYD8|A0A4E0RYD8_FASHE_T-complex_protein_1_subunit_delta_OS=Fasciola_hepatica_OX=6192_GN=D915_007995_PE=3_SV=1	299.95	429.83	678.52	T0+T5+T10	509.89	618.83	436.01	T0+T5+T10	--	0.486938	--	--	--	--
maker-scaffold10x_1458_pilon-snap-gene-0.31-mRNA-1	A0A4E0QUL1	A0A4E0QUL1|A0A4E0QUL1_FASHE_PHD_and_RING_finger_domain-containing_protein_1_OS=Fasciola_hepatica_OX=6192_GN=D915_010619_PE=4_SV=1	9.85	29.36	25.68	T0+T5+T10	0	0	0	ND.	1.31683	0.770066	--	--	--	--
maker-scaffold10x_1458_pilon-snap-gene-0.33-mRNA-1	A0A2H1C197	A0A2H1C197|A0A2H1C197_FASHE_BZIP_transcription_factor_OS=Fasciola_hepatica_OX=6192_GN=D915_007996_PE=4_SV=1	0.19	0.33	0.67	T0+T5+T10	0	0	0	ND.	--	--	--	--	--	--
maker-scaffold10x_1458_pilon-snap-gene-0.34-mRNA-1	A0A504YPI7	A0A504YPI7|A0A504YPI7_FASGI_Phosphoribosyl_pyrophosphate_synthetase_1A_OS=Fasciola_gigantica_OX=46835_GN=FGIG_00551_PE=4_SV=1	66.9	58.49	62.71	T0+T5+T10	98.99	142.42	0	T0+T5	--	-1.03811	--	--	--	--
maker-scaffold10x_1458_pilon-snap-gene-0.35-mRNA-1	A0A504YRG4	A0A504YRG4|A0A504YRG4_FASGI_Putative_trad-d4_OS=Fasciola_gigantica_OX=46835_GN=FGIG_00553_PE=4_SV=1	8.92	8.01	16.78	T0+T5+T10	0	0	0	ND.	--	--	--	--	--	--
maker-scaffold10x_1458_pilon-snap-gene-0.36-mRNA-1	A0A4Z2DNH3	A0A4Z2DNH3|A0A4Z2DNH3_SCHJA_Disks_large_associated_5_OS=Schistosoma_japonicum_OX=6182_GN=EWB00_010726_PE=4_SV=1	24.63	81.8	122.04	T0+T5+T10	0	0	0	ND.	1.52261	1.71139	--	--	--	--
maker-scaffold10x_1458_pilon-snap-gene-0.38-mRNA-1	A0A504YTL3	A0A504YTL3|A0A504YTL3_FASGI_Nonmuscle_myosin_essential_light_chain_OS=Fasciola_gigantica_OX=46835_GN=FGIG_00554_PE=4_SV=1	358.66	577.71	874.34	T0+T5+T10	0	0	0	ND.	--	0.539146	--	--	--	--
maker-scaffold10x_1459_pilon-augustus-gene-0.117-mRNA-1	no hit	no hit	192.4	233.08	187.36	T0+T5+T10	0	0	0	ND.	--	-0.598731	--	--	--	--
maker-scaffold10x_1459_pilon-snap-gene-0.21-mRNA-1	no hit	no hit	0	0	0.61	T10	0	0	0	ND.	--	4.99652	--	--	--	--
maker-scaffold10x_1459_pilon-snap-gene-0.25-mRNA-1	H2KVL5	H2KVL5|H2KVL5_CLOSI_UPF0466_protein_C22orf32_mitochondrial_OS=Clonorchis_sinensis_OX=79923_GN=CLF_112624_PE=4_SV=1	59.89	43.05	32.61	T0+T5+T10	0	0	0	ND.	-0.856858	-1.48827	-0.566972	--	--	--
maker-scaffold10x_1459_pilon-snap-gene-0.26-mRNA-1	A0A4E0RNS1	A0A4E0RNS1|A0A4E0RNS1_FASHE_Sorting_nexin_OS=Fasciola_hepatica_OX=6192_GN=D915_000623_PE=4_SV=1	189.38	214.15	149.6	T0+T5+T10	62.24	160.21	28.19	T0+T5+T10	--	-0.915301	--	--	--	-1.93333
maker-scaffold10x_1459_pilon-snap-gene-0.27-mRNA-1	A0A4E0RID2	A0A4E0RID2|A0A4E0RID2_FASHE_Tensin_OS=Fasciola_hepatica_OX=6192_GN=D915_000621_PE=4_SV=1	0.16	0.23	0.29	T0+T5+T10	0	0	0	ND.	--	--	--	--	--	--
maker-scaffold10x_1459_pilon-snap-gene-0.28-mRNA-1	A0A4E0REG1	A0A4E0REG1|A0A4E0REG1_FASHE_Threonyl_tRNA_synthetase_C_OS=Fasciola_hepatica_OX=6192_GN=D915_003797_PE=3_SV=1	16.97	26.42	40.89	T0+T5+T10	94.89	179.31	29.37	T0+T5+T10	--	0.695728	--	--	--	--
maker-scaffold10x_1459_pilon-snap-gene-0.29-mRNA-1	no hit	no hit	1.22	2.91	1.52	T0+T5+T10	0	0	0	ND.	--	--	--	--	--	--
maker-scaffold10x_1459_pilon-snap-gene-0.30-mRNA-1	A0A4E0RKL9	A0A4E0RKL9|A0A4E0RKL9_FASHE_EGF-like_domain-containing_protein_OS=Fasciola_hepatica_OX=6192_GN=D915_007788_PE=4_SV=1	0	2.03	2.52	T5+T10	0	0	0	ND.	7.08122	7.47354	--	--	--	--
maker-scaffold10x_1459_pilon-snap-gene-0.32-mRNA-1	A0A4E0R9T2	A0A4E0R9T2|A0A4E0R9T2_FASHE_28S_ribosomal_protein_S10_mitochondrial_OS=Fasciola_hepatica_OX=6192_GN=D915_006192_PE=4_SV=1	1.88	2.6	5.57	T0+T5+T10	0	0	0	ND.	--	--	--	--	--	--
maker-scaffold10x_1459_pilon-snap-gene-0.34-mRNA-1	A0A183A014	A0A183A014|A0A183A014_9TREM_KH_domain-containing_protein_OS=Echinostoma_caproni_OX=27848_GN=ECPE_LOCUS299_PE=4_SV=1	421.05	483.61	621.42	T0+T5+T10	384.04	461.49	260.13	T0+T5+T10	--	--	--	--	--	--
maker-scaffold10x_1459_pilon-snap-gene-0.36-mRNA-1	A0A2H1C7S1	A0A2H1C7S1|A0A2H1C7S1_FASHE_DEAD/DEAH_box_helicase_OS=Fasciola_hepatica_OX=6192_GN=D915_006168_PE=4_SV=1	592.79	780.52	898.54	T0+T5+T10	112.69	125.3	109.92	T0+T5+T10	--	--	--	--	--	--
maker-scaffold10x_1464_pilon-augustus-gene-0.13-mRNA-1	A0A504Y8A7	A0A504Y8A7|A0A504Y8A7_FASGI_Serine_palmitoyltransferase_long_chain_base_OS=Fasciola_gigantica_OX=46835_GN=FGIG_01112_PE=4_SV=1	26.16	26.66	21.35	T0+T5+T10	0	0	0	ND.	--	-0.904217	--	--	--	--
maker-scaffold10x_1464_pilon-snap-gene-0.30-mRNA-1	A0A4E0RCU9	A0A4E0RCU9|A0A4E0RCU9_FASHE_E3_ubiquitin-protein_ligase_SHPRH_OS=Fasciola_hepatica_OX=6192_GN=D915_004919_PE=4_SV=1	5.08	7.27	13.9	T0+T5+T10	0	0	0	ND.	--	0.684257	--	--	--	--
maker-scaffold10x_1464_pilon-snap-gene-0.31-mRNA-1	A0A2H1CCZ3	A0A2H1CCZ3|A0A2H1CCZ3_FASHE_Diacylglycerol_acyltransferase_OS=Fasciola_hepatica_OX=6192_GN=D915_07543_PE=4_SV=1	124.61	117.62	74.65	T0+T5+T10	0	0	0	ND.	-0.510361	-1.03483	--	--	--	--
maker-scaffold10x_1464_pilon-snap-gene-0.32-mRNA-1	A0A4E0QZ67	A0A4E0QZ67|A0A4E0QZ67_FASHE_B-box_type_zinc_finger_protein_ncl-1_OS=Fasciola_hepatica_OX=6192_GN=D915_008798_PE=4_SV=1	42.73	56.72	110.91	T0+T5+T10	0	0	0	ND.	--	0.498119	--	--	--	--
maker-scaffold10x_1464_pilon-snap-gene-0.35-mRNA-1	A0A4E0RX27	A0A4E0RX27|A0A4E0RX27_FASHE_40S_ribosomal_protein_S8_OS=Fasciola_hepatica_OX=6192_GN=D915_006559_PE=3_SV=1	1438.65	2774.85	4898.99	T0+T5+T10	3002.16	3824.02	3302.59	T0+T5+T10	0.601847	1.04333	--	--	--	--
maker-scaffold10x_1469_pilon-snap-gene-0.3-mRNA-1	A0A4E0R7D0	A0A4E0R7D0|A0A4E0R7D0_FASHE_Sesquipedalian-1_OS=Fasciola_hepatica_OX=6192_GN=D915_007705_PE=4_SV=1	0	0	0.16	T10	0	0	0	ND.	--	--	--	--	--	--
maker-scaffold10x_147_pilon-augustus-gene-0.67-mRNA-1	A0A504YSS1	A0A504YSS1|A0A504YSS1_FASGI_Ribonuclease_kappa-A_OS=Fasciola_gigantica_OX=46835_GN=FGIG_06463_PE=4_SV=1	221.6	545.81	816.37	T0+T5+T10	0	0	0	ND.	0.883092	1.02969	--	--	--	--
maker-scaffold10x_147_pilon-augustus-gene-0.71-mRNA-1	A0A2H1BSZ7	A0A2H1BSZ7|A0A2H1BSZ7_FASHE_PCI_domain_protein_(Fragment)_OS=Fasciola_hepatica_OX=6192_GN=D915_15026_PE=4_SV=1	5.83	24.83	34.09	T0+T5+T10	0	0	0	ND.	1.59441	1.69416	--	--	--	--
maker-scaffold10x_147_pilon-augustus-gene-0.73-mRNA-1	A0A4E0S3Z5	A0A4E0S3Z5|A0A4E0S3Z5_FASHE_Nuclear_receptor_subfamily_2_group_C_member_2_OS=Fasciola_hepatica_OX=6192_GN=D915_000697_PE=3_SV=1	0.06	0.28	0.24	T0+T5+T10	0	0	0	ND.	--	--	--	--	--	--
maker-scaffold10x_147_pilon-augustus-gene-0.78-mRNA-1	A0A2H1CKI7	A0A2H1CKI7|A0A2H1CKI7_FASHE_COP9_constitutive_photomorphogenic_subunit_2_OS=Fasciola_hepatica_OX=6192_GN=D915_002562_PE=4_SV=1	117.1	99.22	109.59	T0+T5+T10	0	0	0	ND.	-0.731393	-0.772922	--	--	--	--
maker-scaffold10x_147_pilon-pred_gff_StringTie-gene-0.63-mRNA-1	A0A094ZCX7	A0A094ZCX7|A0A094ZCX7_SCHHA_Dynactin_subunit_5_OS=Schistosoma_haematobium_OX=6185_GN=MS3_10676_PE=4_SV=1	2.61	4.07	5.52	T0+T5+T10	0	0	0	ND.	--	--	--	--	--	--
maker-scaffold10x_147_pilon-snap-gene-0.14-mRNA-1	A0A1S8X6I6	A0A1S8X6I6|A0A1S8X6I6_9TREM_FEZ-like_protein_OS=Opisthorchis_viverrini_OX=6198_GN=X801_01761_PE=4_SV=1	148.08	76.83	48.77	T0+T5+T10	0	0	0	ND.	-1.41851	-2.24551	-0.762512	--	--	--
maker-scaffold10x_147_pilon-snap-gene-0.15-mRNA-1	A0A4E0RF34	A0A4E0RF34|A0A4E0RF34_FASHE_NudC_domain-containing_protein_1_OS=Fasciola_hepatica_OX=6192_GN=D915_002563_PE=4_SV=1	24.98	29.13	42.43	T0+T5+T10	0	11.97	0	T5	--	--	--	--	--	--
maker-scaffold10x_147_pilon-snap-gene-0.16-mRNA-1	Q9NGW3	Q9NGW3|Q9NGW3_FASGI_Cathepsin_L_OS=Fasciola_gigantica_OX=46835_GN=cat-L1C_PE=2_SV=1	4.68	0.14	0	T0+T5	0	0	0	ND.	-4.71871	-8.14634	--	--	--	--
maker-scaffold10x_147_pilon-snap-gene-0.20-mRNA-1	A0A4E0RNC9	A0A4E0RNC9|A0A4E0RNC9_FASHE_Endonuclease_OS=Fasciola_hepatica_OX=6192_GN=D915_000698_PE=3_SV=1	10.03	29.48	92.19	T0+T5+T10	0	0	0	ND.	1.32874	2.32934	1.0702	--	--	--
maker-scaffold10x_147_pilon-snap-gene-0.23-mRNA-1	A0A4E0QUF7	A0A4E0QUF7|A0A4E0QUF7_FASHE_Ferrochelatase_OS=Fasciola_hepatica_OX=6192_GN=D915_010286_PE=3_SV=1	7.92	10.92	14.56	T0+T5+T10	0	0	0	ND.	--	--	--	--	--	--
maker-scaffold10x_1473_pilon-augustus-gene-0.12-mRNA-1	G7YLN7	G7YLN7|G7YLN7_CLOSI_KIF1-binding_protein_homolog_OS=Clonorchis_sinensis_OX=79923_GN=CLF_111432_PE=4_SV=1	14.98	14.72	13.17	T0+T5+T10	0	0	0	ND.	--	-0.989169	--	--	--	--
maker-scaffold10x_1473_pilon-augustus-gene-0.13-mRNA-1	A0A4E0QZG5	A0A4E0QZG5|A0A4E0QZG5_FASHE_Selenocysteine_lyase_OS=Fasciola_hepatica_OX=6192_GN=D915_008920_PE=4_SV=1	5.57	4.53	8.38	T0+T5+T10	0	0	0	ND.	--	--	--	--	--	--
maker-scaffold10x_1476_pilon-snap-gene-0.33-mRNA-1	no hit	no hit	0.51	0.79	2.22	T0+T5+T10	0	0	0	ND.	--	1.36627	--	--	--	--
maker-scaffold10x_1476_pilon-snap-gene-0.37-mRNA-1	A0A4E0R0Y7	A0A4E0R0Y7|A0A4E0R0Y7_FASHE_Metallo_beta_lactamase_domain_containing_protein_OS=Fasciola_hepatica_OX=6192_GN=D915_008387_PE=4_SV=1	13.48	16.48	22.37	T0+T5+T10	0	0	0	ND.	--	--	--	--	--	--
maker-scaffold10x_1476_pilon-snap-gene-0.38-mRNA-1	A0A504XG44	A0A504XG44|A0A504XG44_FASGI_Phenylalanyl-tRNA_synthetase_alpha_subunit_OS=Fasciola_gigantica_OX=46835_GN=FGIG_08460_PE=4_SV=1	58.56	75.02	77.24	T0+T5+T10	0	78.05	0	T5	--	--	--	--	--	-4.26471
maker-scaffold10x_1476_pilon-snap-gene-0.39-mRNA-1	no hit	no hit	0.46	0	0	T0	0	0	0	ND.	--	--	--	--	--	--
maker-scaffold10x_1476_pilon-snap-gene-0.41-mRNA-1	no hit	no hit	0.58	0.43	1.77	T0+T5+T10	0	0	0	ND.	--	--	--	--	--	--
maker-scaffold10x_1476_pilon-snap-gene-0.42-mRNA-1	A0A4E0R7E3	A0A4E0R7E3|A0A4E0R7E3_FASHE_Elongator_complex_protein_3_OS=Fasciola_hepatica_OX=6192_GN=D915_007776_PE=3_SV=1	6.41	5.66	12.81	T0+T5+T10	0	0	0	ND.	--	--	--	--	--	--
maker-scaffold10x_1477_pilon-augustus-gene-0.18-mRNA-1	A0A4E0RE08	A0A4E0RE08|A0A4E0RE08_FASHE_Sodium_calcium_exchanger_OS=Fasciola_hepatica_OX=6192_GN=D915_003293_PE=3_SV=1	0.11	0	0	T0	0	0	0	ND.	--	--	--	--	--	--
maker-scaffold10x_1477_pilon-snap-gene-0.10-mRNA-1	A0A2H1C6N0	A0A2H1C6N0|A0A2H1C6N0_FASHE_Core-2/I-Branching_enzyme_OS=Fasciola_hepatica_OX=6192_GN=D915_10578_PE=4_SV=1	0.34	0.67	0.23	T0+T5+T10	0	0	0	ND.	--	--	--	--	--	--
maker-scaffold10x_1477_pilon-snap-gene-0.9-mRNA-1	A0A504YSA4	A0A504YSA4|A0A504YSA4_FASGI_TBC1_domain_family_member_13_OS=Fasciola_gigantica_OX=46835_GN=FGIG_01809_PE=4_SV=1	0.08	0	0	T0	0	0	0	ND.	--	--	--	--	--	--
maker-scaffold10x_1478_pilon-augustus-gene-0.1-mRNA-1	A0A4E0R0I1	A0A4E0R0I1|A0A4E0R0I1_FASHE_DUF1279_domain-containing_protein_OS=Fasciola_hepatica_OX=6192_GN=D915_007983_PE=4_SV=1	5.49	2.65	2.44	T0+T5+T10	0	0	0	ND.	--	--	--	--	--	--
maker-scaffold10x_1478_pilon-snap-gene-0.30-mRNA-1	A0A504Y869	A0A504Y869|A0A504Y869_FASGI_Cytochrome_b5_reductase_4_OS=Fasciola_gigantica_OX=46835_GN=FGIG_09615_PE=4_SV=1	0.93	0.12	1.34	T0+T5+T10	0	0	0	ND.	--	--	--	--	--	--
maker-scaffold10x_1478_pilon-snap-gene-0.32-mRNA-1	A0A504Z4X3	A0A504Z4X3|A0A504Z4X3_FASGI_Kinesin-like_protein_OS=Fasciola_gigantica_OX=46835_GN=FGIG_06387_PE=3_SV=1	0	0	1.12	T10	0	0	0	ND.	--	--	--	--	--	--
maker-scaffold10x_1478_pilon-snap-gene-0.33-mRNA-1	A0A4E0QWS6	A0A4E0QWS6|A0A4E0QWS6_FASHE_Kinesin-like_protein_(Fragment)_OS=Fasciola_hepatica_OX=6192_GN=D915_009695_PE=3_SV=1	17.85	29.5	34.29	T0+T5+T10	0	0	0	ND.	--	--	--	--	--	--
maker-scaffold10x_1478_pilon-snap-gene-0.34-mRNA-1	A0A4E0R5L1	A0A4E0R5L1|A0A4E0R5L1_FASHE_Sel1_repeat-containing_protein_1B_OS=Fasciola_hepatica_OX=6192_GN=D915_008050_PE=4_SV=1	34.78	29.77	53.74	T0+T5+T10	0	0	0	ND.	--	--	--	--	--	--
maker-scaffold10x_1478_pilon-snap-gene-0.35-mRNA-1	A0A4E0QTE9	A0A4E0QTE9|A0A4E0QTE9_FASHE_Adrenodoxin_mitochondrial_OS=Fasciola_hepatica_OX=6192_GN=D915_011035_PE=4_SV=1	17	14.91	25.78	T0+T5+T10	0	0	0	ND.	--	--	--	--	--	--
maker-scaffold10x_1478_pilon-snap-gene-0.36-mRNA-1	A0A504Z4X3	A0A504Z4X3|A0A504Z4X3_FASGI_Kinesin-like_protein_OS=Fasciola_gigantica_OX=46835_GN=FGIG_06387_PE=3_SV=1	1.35	0	0.2	T0+T10	0	0	0	ND.	--	--	--	--	--	--
maker-scaffold10x_1482_pilon-augustus-gene-0.22-mRNA-1	A0A4E0RSN4	A0A4E0RSN4|A0A4E0RSN4_FASHE_Beta_N_acetylglucosaminyl_L_asparaginase_OS=Fasciola_hepatica_OX=6192_GN=D915_004947_PE=4_SV=1	0.19	0.72	2.79	T0+T5+T10	0	0	0	ND.	--	2.68653	--	--	--	--
maker-scaffold10x_1482_pilon-augustus-gene-0.23-mRNA-1	A0A5K4FAN2	A0A5K4FAN2|A0A5K4FAN2_SCHMA_HORMA_domain-containing_protein_OS=Schistosoma_mansoni_OX=6183_PE=4_SV=1	13.51	11.69	16.14	T0+T5+T10	0	0	0	ND.	-0.653797	--	--	--	--	--
maker-scaffold10x_1482_pilon-snap-gene-0.2-mRNA-1	A0A4E0RA85	A0A4E0RA85|A0A4E0RA85_FASHE_DEAD_box_ATP_dependent_RNA_helicase_OS=Fasciola_hepatica_OX=6192_GN=D915_004945_PE=4_SV=1	29.15	49.97	77.93	T0+T5+T10	0	0	0	ND.	0.505335	0.587527	--	--	--	--
maker-scaffold10x_149_pilon-augustus-gene-0.69-mRNA-1	A0A4E0RCA2	A0A4E0RCA2|A0A4E0RCA2_FASHE_ATP_dependent_RNA_helicase_DHX35_OS=Fasciola_hepatica_OX=6192_GN=D915_005064_PE=4_SV=1	4.6	10.88	9.32	T0+T5+T10	0	0	0	ND.	--	--	--	--	--	--
maker-scaffold10x_149_pilon-augustus-gene-0.73-mRNA-1	A0A3R7JU48	A0A3R7JU48|A0A3R7JU48_CLOSI_Cilia-and_flagella-associated_protein_74_OS=Clonorchis_sinensis_OX=79923_GN=Cfap74_PE=4_SV=1	0.8	2.14	1.65	T0+T5+T10	0	0	0	ND.	--	--	--	--	--	--
maker-scaffold10x_149_pilon-augustus-gene-0.76-mRNA-1	G7Y7P4	G7Y7P4|G7Y7P4_CLOSI_Transmembrane_protein_35_OS=Clonorchis_sinensis_OX=79923_GN=CLF_102335_PE=4_SV=1	13.19	22.45	27.81	T0+T5+T10	0	0	0	ND.	--	--	--	--	--	--
maker-scaffold10x_149_pilon-augustus-gene-0.77-mRNA-1	A0A4E0RCC3	A0A4E0RCC3|A0A4E0RCC3_FASHE_Guanine_nucleotide-binding_protein_subunit_beta_OS=Fasciola_hepatica_OX=6192_GN=D915_005288_PE=4_SV=1	3.67	6.35	10.08	T0+T5+T10	0	0	0	ND.	--	0.693881	--	--	--	--
maker-scaffold10x_149_pilon-augustus-gene-0.78-mRNA-1	A0A4E0RTU8	A0A4E0RTU8|A0A4E0RTU8_FASHE_Glypican_OS=Fasciola_hepatica_OX=6192_GN=D915_005066_PE=3_SV=1	8.71	29.27	31.85	T0+T5+T10	0	0	0	ND.	1.26655	1.04138	--	--	--	--
maker-scaffold10x_149_pilon-augustus-gene-0.82-mRNA-1	G7YLJ6	G7YLJ6|G7YLJ6_CLOSI_Protein_Simiate_OS=Clonorchis_sinensis_OX=79923_GN=fam206a_PE=4_SV=1	42.71	93.09	146.88	T0+T5+T10	0	0	0	ND.	0.774138	1.08308	--	--	--	--
maker-scaffold10x_149_pilon-snap-gene-0.103-mRNA-1	A0A4E0RAX9	A0A4E0RAX9|A0A4E0RAX9_FASHE_Calpain-9_OS=Fasciola_hepatica_OX=6192_GN=D915_006209_PE=3_SV=1	57.55	49.69	29.02	T0+T5+T10	0	0	0	ND.	-0.699148	-1.73817	-0.97585	--	--	--
maker-scaffold10x_149_pilon-snap-gene-0.104-mRNA-1	no hit	no hit	2.48	0	1.14	T0+T10	0	0	0	ND.	--	-2.34152	--	--	--	--
maker-scaffold10x_149_pilon-snap-gene-0.107-mRNA-1	A0A075AHF4	A0A075AHF4|A0A075AHF4_9TREM_Alpha-1,4_glucan_phosphorylase_OS=Opisthorchis_viverrini_OX=6198_GN=T265_03696_PE=3_SV=1	0	1.21	0.5	T5+T10	29.56	4.5	0	T0+T5	--	--	--	--	--	--
maker-scaffold10x_149_pilon-snap-gene-0.109-mRNA-1	A0A504Z0S3	A0A504Z0S3|A0A504Z0S3_FASGI_PRKCA-binding_protein_isoform_B_OS=Fasciola_gigantica_OX=46835_GN=FGIG_07292_PE=4_SV=1	34.25	40.42	45.99	T0+T5+T10	0	0	0	ND.	--	--	--	--	--	--
maker-scaffold10x_149_pilon-snap-gene-0.110-mRNA-1	A0A4E0R3M5	A0A4E0R3M5|A0A4E0R3M5_FASHE_DENN_domain-containing_protein_5B_OS=Fasciola_hepatica_OX=6192_GN=D915_005748_PE=4_SV=1	6.04	6.43	6.51	T0+T5+T10	0	0	0	ND.	--	--	--	--	--	--
maker-scaffold10x_149_pilon-snap-gene-0.89-mRNA-1	A0A504YHM4	A0A504YHM4|A0A504YHM4_FASGI_Segment_polarity_protein_dishevelled_DVL-3_OS=Fasciola_gigantica_OX=46835_GN=FGIG_04177_PE=4_SV=1	18.46	21.37	21.25	T0+T5+T10	0	0	0	ND.	--	--	--	--	--	--
maker-scaffold10x_149_pilon-snap-gene-0.90-mRNA-1	A0A4E0RUY7	A0A4E0RUY7|A0A4E0RUY7_FASHE_Pre-mRNA-splicing_factor_38B_OS=Fasciola_hepatica_OX=6192_GN=D915_003145_PE=4_SV=1	3.09	5.99	10.53	T0+T5+T10	0	0	0	ND.	0.598905	1.14392	0.61235	--	--	--
maker-scaffold10x_149_pilon-snap-gene-0.91-mRNA-1	A0A4E0RWK3	A0A4E0RWK3|A0A4E0RWK3_FASHE_Multidrug_resistance-associated_protein_4_OS=Fasciola_hepatica_OX=6192_GN=D915_003144_PE=4_SV=1	76.42	72.6	40.4	T0+T5+T10	0	0	0	ND.	-0.546518	-1.58201	-0.972551	--	--	--
maker-scaffold10x_149_pilon-snap-gene-0.95-mRNA-1	A0A4E0QZK3	A0A4E0QZK3|A0A4E0QZK3_FASHE_Adenosine_3'-phospho_5'-phosphosulfate_transporter_OS=Fasciola_hepatica_OX=6192_GN=D915_008596_PE=4_SV=1	8.38	9.51	12.41	T0+T5+T10	0	0	0	ND.	--	--	--	--	--	--
maker-scaffold10x_149_pilon-snap-gene-0.99-mRNA-1	A0A2H1BWL2	A0A2H1BWL2|A0A2H1BWL2_FASHE_ATP_synthase_subunit_d,_mitochondrial_OS=Fasciola_hepatica_OX=6192_GN=D915_009069_PE=3_SV=1	297.11	359.78	403.76	T0+T5+T10	0	0	0	ND.	--	--	--	--	--	--
maker-scaffold10x_1490_pilon-snap-gene-0.1-mRNA-1	A0A4E0RVU6	A0A4E0RVU6|A0A4E0RVU6_FASHE_Epithelial_splicing_regulatory_protein_1_OS=Fasciola_hepatica_OX=6192_GN=D915_003825_PE=4_SV=1	1.15	1.02	1.49	T0+T5+T10	0	0	0	ND.	--	--	--	--	--	--
maker-scaffold10x_1491_pilon-snap-gene-0.2-mRNA-1	A0A4E0QY98	A0A4E0QY98|A0A4E0QY98_FASHE_Suppressor_of_G2_allele_of_SKP1_OS=Fasciola_hepatica_OX=6192_GN=D915_009002_PE=4_SV=1	0.98	0	0	T0	0	0	0	ND.	--	--	--	--	--	--
maker-scaffold10x_1492_pilon-augustus-gene-0.15-mRNA-1	A0A2H1CJD9	A0A2H1CJD9|A0A2H1CJD9_FASHE_CT20_family_protein_OS=Fasciola_hepatica_OX=6192_GN=D915_05147_PE=4_SV=1	12.83	24.45	44.1	T0+T5+T10	0	0	0	ND.	--	1.07276	0.590417	--	--	--
maker-scaffold10x_1492_pilon-snap-gene-0.23-mRNA-1	A0A4E0RKH3	A0A4E0RKH3|A0A4E0RKH3_FASHE_Arachidonate_5-lipoxygenase_OS=Fasciola_hepatica_OX=6192_GN=D915_007426_PE=4_SV=1	0.09	0.15	0.63	T0+T5+T10	0	0	0	ND.	--	--	--	--	--	--
maker-scaffold10x_1492_pilon-snap-gene-0.24-mRNA-1	A0A4E0RKH3	A0A4E0RKH3|A0A4E0RKH3_FASHE_Arachidonate_5-lipoxygenase_OS=Fasciola_hepatica_OX=6192_GN=D915_007426_PE=4_SV=1	0.98	0.99	0.19	T0+T5+T10	0	0	0	ND.	--	--	--	--	--	--
maker-scaffold10x_1492_pilon-snap-gene-0.25-mRNA-1	A0A4E0RYR6	A0A4E0RYR6|A0A4E0RYR6_FASHE_Signal_recognition_particle_subunit_SRP72_OS=Fasciola_hepatica_OX=6192_GN=D915_007428_PE=4_SV=1	0.19	0.25	0	T0+T5	0	42.17	0	T5	--	--	--	--	--	--
maker-scaffold10x_1493_pilon-augustus-gene-0.0-mRNA-1	A0A504YSI8	A0A504YSI8|A0A504YSI8_FASGI_Coiled-coil_domain-containing_protein_39_OS=Fasciola_gigantica_OX=46835_GN=FGIG_08307_PE=4_SV=1	1.95	4.8	3.19	T0+T5+T10	0	0	0	ND.	--	--	--	--	--	--
maker-scaffold10x_1493_pilon-pred_gff_StringTie-gene-0.11-mRNA-1	no hit	no hit	188.54	900.42	1036.2	T0+T5+T10	0	0	0	ND.	1.92002	1.5536	--	--	--	--
maker-scaffold10x_1493_pilon-snap-gene-0.19-mRNA-1	A0A4E0R8H7	A0A4E0R8H7|A0A4E0R8H7_FASHE_Cyclin-dependent_kinase_OS=Fasciola_hepatica_OX=6192_GN=D915_006769_PE=3_SV=1	74.67	94.19	90.24	T0+T5+T10	0	0	0	ND.	--	--	--	--	--	--
maker-scaffold10x_1499_pilon-augustus-gene-0.30-mRNA-1	A0A4E0R8Y4	A0A4E0R8Y4|A0A4E0R8Y4_FASHE_DM9_domain-containing_protein_OS=Fasciola_hepatica_OX=6192_GN=D915_003994_PE=4_SV=1	0	0.21	11.7	T5+T10	0	0	0	ND.	--	6.37443	5.11789	--	--	--
maker-scaffold10x_1499_pilon-augustus-gene-0.34-mRNA-1	no hit	no hit	0.52	1.33	0.94	T0+T5+T10	0	0	0	ND.	--	--	--	--	--	--
maker-scaffold10x_1499_pilon-pred_gff_StringTie-gene-0.39-mRNA-1	no hit	no hit	356.05	232.31	201.65	T0+T5+T10	0	0	0	ND.	-0.882619	-1.31464	--	--	--	--
maker-scaffold10x_1499_pilon-snap-gene-0.19-mRNA-1	A0A2H1CAH8	A0A2H1CAH8|A0A2H1CAH8_FASHE_Cofilin/tropomyosin-type_actin-binding_protein_OS=Fasciola_hepatica_OX=6192_GN=D915_005116_PE=3_SV=1	139.92	63.47	97.24	T0+T5+T10	39.4	326.9	148.33	T0+T5+T10	-1.50939	-1.26993	--	--	--	--
maker-scaffold10x_1499_pilon-snap-gene-0.20-mRNA-1	A0A4E0S1V5	A0A4E0S1V5|A0A4E0S1V5_FASHE_G-protein-signaling_modulator_2_OS=Fasciola_hepatica_OX=6192_GN=D915_003995_PE=4_SV=1	2.64	9.01	11.56	T0+T5+T10	0	0	0	ND.	1.35077	1.47172	--	--	--	--
maker-scaffold10x_1499_pilon-snap-gene-0.22-mRNA-1	A0A2H1CJU9	A0A2H1CJU9|A0A2H1CJU9_FASHE_Translocation_protein_Sec62_OS=Fasciola_hepatica_OX=6192_GN=D915_05544_PE=4_SV=1	20.86	25.64	38.71	T0+T5+T10	0	0	0	ND.	--	--	--	--	--	--
maker-scaffold10x_1499_pilon-snap-gene-0.23-mRNA-1	A0A4E0RCW4	A0A4E0RCW4|A0A4E0RCW4_FASHE_RNA_binding_protein_19_OS=Fasciola_hepatica_OX=6192_GN=D915_005204_PE=4_SV=1	13.09	25.72	30.09	T0+T5+T10	0	0	0	ND.	--	--	--	--	--	--
maker-scaffold10x_1499_pilon-snap-gene-0.24-mRNA-1	A0A4E0QY90	A0A4E0QY90|A0A4E0QY90_FASHE_Signal_transducing_adaptor_molecule_(Fragment)_OS=Fasciola_hepatica_OX=6192_GN=D915_008972_PE=4_SV=1	30.51	49.43	47.14	T0+T5+T10	32.31	24.54	0	T0+T5	--	--	--	--	-4.61268	-3.61908
maker-scaffold10x_1499_pilon-snap-gene-0.25-mRNA-1	C6ZDD0	C6ZDD0|C6ZDD0_SCHJA_Frizzled_7_OS=Schistosoma_japonicum_OX=6182_PE=2_SV=1	1.22	3.39	9.74	T0+T5+T10	0	0	0	ND.	--	1.87907	--	--	--	--
maker-scaffold10x_15_pilon-augustus-gene-0.36-mRNA-1	A0A4E0QYN4	A0A4E0QYN4|A0A4E0QYN4_FASHE_Putative_recs1_protein_(Responsive_to_centrifugal_force_and_shear_stressprotein_1_protein)_OS=Fasciola_hepatica_OX=6192_GN=D915_008807_PE=3_SV=1	0.79	0	0	T0	0	0	0	ND.	--	--	--	--	--	--
maker-scaffold10x_15_pilon-augustus-gene-0.37-mRNA-1	A0A4E0QX54	A0A4E0QX54|A0A4E0QX54_FASHE_Transmembrane_BAX_inhibitor_motif_containing_1_OS=Fasciola_hepatica_OX=6192_GN=D915_009543_PE=3_SV=1	23.19	29.27	21.81	T0+T5+T10	0	0	0	ND.	--	-0.763492	--	--	--	--
maker-scaffold10x_15_pilon-snap-gene-0.21-mRNA-1	A0A2H1BTH7	A0A2H1BTH7|A0A2H1BTH7_FASHE_Ribosomal_L18p/L5e_family_protein_OS=Fasciola_hepatica_OX=6192_GN=D915_010416_PE=3_SV=1	769.56	1163.16	2182.58	T0+T5+T10	1668.54	2130.79	870.01	T0+T5+T10	--	0.898723	0.715124	--	--	-1.11144
maker-scaffold10x_15_pilon-snap-gene-0.23-mRNA-1	A0A4E0RFV0	A0A4E0RFV0|A0A4E0RFV0_FASHE_Putative_ribosome-associated_chaperone_zuotin_translation_OS=Fasciola_hepatica_OX=6192_GN=D915_008806_PE=4_SV=1	37.41	53.23	83.08	T0+T5+T10	0	0	0	ND.	--	--	--	--	--	--
maker-scaffold10x_15_pilon-snap-gene-0.25-mRNA-1	A0A4E0RVX9	A0A4E0RVX9|A0A4E0RVX9_FASHE_DUF667_domain-containing_protein_OS=Fasciola_hepatica_OX=6192_GN=D915_002496_PE=4_SV=1	0.44	1.89	2.21	T0+T5+T10	0	0	0	ND.	--	1.73227	--	--	--	--
maker-scaffold10x_15_pilon-snap-gene-0.28-mRNA-1	A0A4E0QY38	A0A4E0QY38|A0A4E0QY38_FASHE_Ribosomal_protein_L36_OS=Fasciola_hepatica_OX=6192_GN=D915_010970_PE=4_SV=1	814.08	1054.61	1646.11	T0+T5+T10	0	0	0	ND.	--	--	--	--	--	--
maker-scaffold10x_15_pilon-snap-gene-0.29-mRNA-1	A0A504Y706	A0A504Y706|A0A504Y706_FASGI_Zinc_finger_protein_OS=Fasciola_gigantica_OX=46835_GN=FGIG_09866_PE=4_SV=1	17.59	12.43	15.24	T0+T5+T10	0	0	0	ND.	-0.98506	-1.10861	--	--	--	--
maker-scaffold10x_15_pilon-snap-gene-0.30-mRNA-1	A0A504Y9H5	A0A504Y9H5|A0A504Y9H5_FASGI_Spectrin_alpha_chain_non-erythrocytic_OS=Fasciola_gigantica_OX=46835_GN=FGIG_09949_PE=4_SV=1	39.72	48.81	64.44	T0+T5+T10	163.91	294.83	206.29	T0+T5+T10	--	--	--	--	--	--
maker-scaffold10x_15_pilon-snap-gene-0.31-mRNA-1	A0A1S8X8B1	A0A1S8X8B1|A0A1S8X8B1_9TREM_Kinase_domain_protein_OS=Opisthorchis_viverrini_OX=6198_GN=X801_01190_PE=4_SV=1	11.93	14.86	13.01	T0+T5+T10	0	0	0	ND.	--	-0.616865	--	--	--	--
maker-scaffold10x_150_pilon-augustus-gene-0.14-mRNA-1	A0A4E0R459	A0A4E0R459|A0A4E0R459_FASHE_Nucleoside_diphosphate_kinase_OS=Fasciola_hepatica_OX=6192_GN=D915_006041_PE=3_SV=1	1.61	0.32	0.09	T0+T5+T10	252.26	38.03	122.11	T0+T5+T10	--	-4.13838	--	-3.82628	--	--
maker-scaffold10x_150_pilon-augustus-gene-0.17-mRNA-1	A0A4E0R5L6	A0A4E0R5L6|A0A4E0R5L6_FASHE_SURF1-like_protein_OS=Fasciola_hepatica_OX=6192_GN=D915_006686_PE=3_SV=1	0	0.66	1.07	T5+T10	0	0	0	ND.	--	--	--	--	--	--
maker-scaffold10x_150_pilon-snap-gene-0.23-mRNA-1	A0A504YWJ1	A0A504YWJ1|A0A504YWJ1_FASGI_Apple_domain-containing_protein_OS=Fasciola_gigantica_OX=46835_GN=FGIG_06226_PE=4_SV=1	0	0	0.36	T10	0	0	0	ND.	--	--	--	--	--	--
maker-scaffold10x_1500_pilon-augustus-gene-0.6-mRNA-1	A0A2H1CBA7	A0A2H1CBA7|A0A2H1CBA7_FASHE_Serine/threonine-protein_phosphatase_OS=Fasciola_hepatica_OX=6192_GN=D915_005130_PE=3_SV=1	130.53	158.85	167.92	T0+T5+T10	0	0	0	ND.	--	--	--	--	--	--
maker-scaffold10x_1500_pilon-snap-gene-0.67-mRNA-1	C1L516	C1L516|C1L516_SCHJA_Cleavage_stimulation_factor_50_kDa_subunit_OS=Schistosoma_japonicum_OX=6182_GN=CstF-50_PE=2_SV=1	0	0.64	1.96	T5+T10	0	0	0	ND.	6.42229	7.26849	--	--	--	--
maker-scaffold10x_1500_pilon-snap-gene-0.68-mRNA-1	C1LLN3	C1LLN3|C1LLN3_SCHJA_GPI_mannosyltransferase_4_isoform_1_OS=Schistosoma_japonicum_OX=6182_GN=EWB00_003682_PE=2_SV=1	43.53	68.23	112.04	T0+T5+T10	0	0	0	ND.	--	--	--	--	--	--
maker-scaffold10x_1500_pilon-snap-gene-0.69-mRNA-1	A0A4E0RL90	A0A4E0RL90|A0A4E0RL90_FASHE_SWI/SNF_nucleosome_remodeling_complex_component_OS=Fasciola_hepatica_OX=6192_GN=D915_007724_PE=3_SV=1	1.08	3.48	13.65	T0+T5+T10	0	0	0	ND.	1.78142	3.10679	1.39056	--	--	--
maker-scaffold10x_1500_pilon-snap-gene-0.70-mRNA-1	A0A4E0QXU7	A0A4E0QXU7|A0A4E0QXU7_FASHE_Vesicle_transport_protein_OS=Fasciola_hepatica_OX=6192_GN=D915_009947_PE=3_SV=1	32.25	26.39	11.78	T0+T5+T10	0	0	0	ND.	-0.720531	-2.15287	-1.36636	--	--	--
maker-scaffold10x_1500_pilon-snap-gene-0.73-mRNA-1	A0A4E0RML2	A0A4E0RML2|A0A4E0RML2_FASHE_5-aminolevulinate_synthase_OS=Fasciola_hepatica_OX=6192_GN=D915_006603_PE=3_SV=1	39.12	46.5	80.8	T0+T5+T10	0	0	0	ND.	--	--	--	--	--	--
maker-scaffold10x_1500_pilon-snap-gene-0.74-mRNA-1	no hit	no hit	382.33	254.08	362.77	T0+T5+T10	0	0	0	ND.	-1.05704	-0.970112	--	--	--	--
maker-scaffold10x_1500_pilon-snap-gene-0.75-mRNA-1	A0A4E0RJL9	A0A4E0RJL9|A0A4E0RJL9_FASHE_Putative_Zinc_finger_protein_OS=Fasciola_hepatica_OX=6192_GN=D915_007725_PE=4_SV=1	469.1	452.8	394.67	T0+T5+T10	0	0	0	ND.	-0.464801	-0.959066	--	--	--	--
maker-scaffold10x_1500_pilon-snap-gene-0.76-mRNA-1	A0A2H1BZ67	A0A2H1BZ67|A0A2H1BZ67_FASHE_Heterogeneous_nuclear_ribonucleoprotein_A2_OS=Fasciola_hepatica_OX=6192_GN=D915_009015_PE=4_SV=1	727.37	831.14	1201.64	T0+T5+T10	760.4	679.31	503.12	T0+T5+T10	--	--	--	--	--	--
maker-scaffold10x_1500_pilon-snap-gene-0.77-mRNA-1	A0A4E0RXA6	A0A4E0RXA6|A0A4E0RXA6_FASHE_DNA_replication_complex_GINS_protein_PSF2_OS=Fasciola_hepatica_OX=6192_GN=D915_009013_PE=3_SV=1	11.33	18.72	22.29	T0+T5+T10	0	0	0	ND.	--	--	--	--	--	--
maker-scaffold10x_1500_pilon-snap-gene-0.79-mRNA-1	A0A4E0RV13	A0A4E0RV13|A0A4E0RV13_FASHE_Calcium-transporting_ATPase_OS=Fasciola_hepatica_OX=6192_GN=D915_003311_PE=3_SV=1	94.17	66.26	46.53	T0+T5+T10	9.46	46.39	8.55	T0+T5+T10	-0.805517	-1.55405	-0.686522	1.89122	--	--
maker-scaffold10x_1502_pilon-augustus-gene-0.42-mRNA-1	A0A4E0RMU8	A0A4E0RMU8|A0A4E0RMU8_FASHE_tRNA_(guanine-N(7)-)-methyltransferase_OS=Fasciola_hepatica_OX=6192_GN=D915_006295_PE=3_SV=1	19.36	15.99	17.46	T0+T5+T10	0	0	0	ND.	--	--	--	--	--	--
maker-scaffold10x_1502_pilon-pred_gff_StringTie-gene-0.52-mRNA-1	no hit	no hit	0.25	0.35	0.48	T0+T5+T10	0	0	0	ND.	--	--	--	--	--	--
maker-scaffold10x_1502_pilon-snap-gene-0.18-mRNA-1	A0A4E0RPG9	A0A4E0RPG9|A0A4E0RPG9_FASHE_tRNA_(Guanine(46)-N(7))-methyltransferase_OS=Fasciola_hepatica_OX=6192_GN=D915_006294_PE=4_SV=1	4	10.96	9.92	T0+T5+T10	0	0	0	ND.	--	0.896387	--	--	--	--
maker-scaffold10x_1502_pilon-snap-gene-0.21-mRNA-1	A0A4Z2CXX3	A0A4Z2CXX3|A0A4Z2CXX3_SCHJA_Spindle_assembly_checkpoint_component_MAD1_(Mitotic_arrest_deficient_1)_(Fragment)_OS=Schistosoma_japonicum_OX=6182_GN=EWB00_006561_PE=4_SV=1	0.31	0.07	0.15	T0+T5+T10	0	0	0	ND.	--	--	--	--	--	--
maker-scaffold10x_1502_pilon-snap-gene-0.23-mRNA-1	A0A4E0RE54	A0A4E0RE54|A0A4E0RE54_FASHE_Receptor-type_tyrosine-protein_phosphatase_delta_OS=Fasciola_hepatica_OX=6192_GN=D915_004604_PE=4_SV=1	0.73	0.6	0.04	T0+T5+T10	0	0	0	ND.	--	--	--	--	--	--
maker-scaffold10x_1502_pilon-snap-gene-0.24-mRNA-1	A0A4E0R8D9	A0A4E0R8D9|A0A4E0R8D9_FASHE_Mitogen-activated_protein_kinase_kinase_kinase_15_OS=Fasciola_hepatica_OX=6192_GN=D915_004118_PE=4_SV=1	0.19	0.03	0	T0+T5	0	0	0	ND.	--	--	--	--	--	--
maker-scaffold10x_1502_pilon-snap-gene-0.25-mRNA-1	A0A504Y8X8	A0A504Y8X8|A0A504Y8X8_FASGI_IRS-type_PTB_domain-containing_protein_OS=Fasciola_gigantica_OX=46835_GN=FGIG_07629_PE=4_SV=1	2.97	5.26	5.9	T0+T5+T10	0	0	0	ND.	--	--	--	--	--	--
maker-scaffold10x_1517_pilon-augustus-gene-0.0-mRNA-1	no hit	no hit	13.77	9.06	7.3	T0+T5+T10	0	0	0	ND.	-0.937725	-1.33787	--	--	--	--
maker-scaffold10x_1517_pilon-snap-gene-0.11-mRNA-1	A0A504Z1A8	A0A504Z1A8|A0A504Z1A8_FASGI_Natterin-4_OS=Fasciola_gigantica_OX=46835_GN=FGIG_06960_PE=4_SV=1	0	0	85.92	T10	0	0	0	ND.	--	9.47228	--	--	--	--
maker-scaffold10x_1517_pilon-snap-gene-0.12-mRNA-1	A0A4E0RET5	A0A4E0RET5|A0A4E0RET5_FASHE_DUF3421_domain-containing_protein_OS=Fasciola_hepatica_OX=6192_GN=D915_004249_PE=4_SV=1	4.49	2.59	12.89	T0+T5+T10	0	0	0	ND.	--	--	2.21155	--	--	--
maker-scaffold10x_1520_pilon-augustus-gene-0.4-mRNA-1	A0A504Z589	A0A504Z589|A0A504Z589_FASGI_X-linked_nuclear_protein_(Fragment)_OS=Fasciola_gigantica_OX=46835_GN=FGIG_05192_PE=4_SV=1	31.85	70.36	71.44	T0+T5+T10	0	0	0	ND.	0.788353	0.585417	--	--	--	--
maker-scaffold10x_1528_pilon-snap-gene-0.12-mRNA-1	A0A4E0RS50	A0A4E0RS50|A0A4E0RS50_FASHE_Lebercilin_OS=Fasciola_hepatica_OX=6192_GN=D915_006048_PE=4_SV=1	1.23	0	0.57	T0+T10	0	0	0	ND.	-4.65195	--	--	--	--	--
maker-scaffold10x_1528_pilon-snap-gene-0.13-mRNA-1	A0A4E0R8M7	A0A4E0R8M7|A0A4E0R8M7_FASHE_Serine/threonine-protein_phosphatase_OS=Fasciola_hepatica_OX=6192_GN=D915_006047_PE=3_SV=1	62.14	79.86	107.5	T0+T5+T10	79.71	103.99	45.05	T0+T5+T10	--	--	--	--	--	--
maker-scaffold10x_1534_pilon-augustus-gene-0.12-mRNA-1	no hit	no hit	0.32	0.19	0	T0+T5	0	0	0	ND.	--	--	--	--	--	--
maker-scaffold10x_1534_pilon-snap-gene-0.1-mRNA-1	no hit	no hit	0.09	0	0.62	T0+T10	0	0	0	ND.	--	--	--	--	--	--
maker-scaffold10x_1542_pilon-augustus-gene-0.62-mRNA-1	A0A504YRK2	A0A504YRK2|A0A504YRK2_FASGI_Glycerophosphodiester_phosphodiesterase_domain-containing_protein_1_(Fragment)_OS=Fasciola_gigantica_OX=46835_GN=FGIG_02013_PE=4_SV=1	44.14	5.63	12.38	T0+T5+T10	0	0	0	ND.	--	-2.49653	--	--	--	--
maker-scaffold10x_1542_pilon-snap-gene-0.11-mRNA-1	A0A4E0QXW7	A0A4E0QXW7|A0A4E0QXW7_FASHE_Protein_dispatched_1_OS=Fasciola_hepatica_OX=6192_GN=D915_009024_PE=4_SV=1	6.33	5.38	7.49	T0+T5+T10	0	0	0	ND.	--	--	--	--	--	--
maker-scaffold10x_1542_pilon-snap-gene-0.12-mRNA-1	A0A504Y2A7	A0A504Y2A7|A0A504Y2A7_LEIDO_Hsp70_family_protein_OS=Leishmania_donovani_OX=5661_GN=CGC20_36230_PE=4_SV=1	57.97	52.6	50.34	T0+T5+T10	3831.52	4245	3494.52	T0+T5+T10	-0.456039	-0.72075	--	--	--	-0.424165
maker-scaffold10x_1542_pilon-snap-gene-0.15-mRNA-1	A0A4E0RT97	A0A4E0RT97|A0A4E0RT97_FASHE_Replication_factor_c_subunit_2_OS=Fasciola_hepatica_OX=6192_GN=D915_004377_PE=4_SV=1	66.08	151.01	174.69	T0+T5+T10	0	0	0	ND.	0.656585	0.481088	--	--	--	--
maker-scaffold10x_1542_pilon-snap-gene-0.16-mRNA-1	A0A4E0S0U1	A0A4E0S0U1|A0A4E0S0U1_FASHE_Zinc_finger_HIT_domain-containing_protein_1_OS=Fasciola_hepatica_OX=6192_GN=D915_004964_PE=4_SV=1	0	0	0	ND.	93.37	0	0	T0	--	--	--	-4.78265	-4.78265	--
maker-scaffold10x_1542_pilon-snap-gene-0.17-mRNA-1	A0A4E0R023	A0A4E0R023|A0A4E0R023_FASHE_Glycerophosphodiester_phosphodiesterase_domain-containing_protein_1_OS=Fasciola_hepatica_OX=6192_GN=D915_008158_PE=4_SV=1	24.29	53.22	29.77	T0+T5+T10	0	0	0	ND.	--	--	-0.746405	--	--	--
maker-scaffold10x_1543_pilon-snap-gene-0.11-mRNA-1	A0A4E0R9S3	A0A4E0R9S3|A0A4E0R9S3_FASHE_Procollagen-lysine_2-oxoglutarate_5-dioxygenase_OS=Fasciola_hepatica_OX=6192_GN=D915_005247_PE=4_SV=1	17.39	38.59	61.57	T0+T5+T10	0	0	0	ND.	0.68513	1.04648	--	--	--	--
maker-scaffold10x_1546_pilon-augustus-gene-0.0-mRNA-1	A0A4E0S0S3	A0A4E0S0S3|A0A4E0S0S3_FASHE_Diacylglycerol_kinase_OS=Fasciola_hepatica_OX=6192_GN=D915_005279_PE=3_SV=1	0.67	1.35	1.12	T0+T5+T10	0	0	0	ND.	--	--	--	--	--	--
maker-scaffold10x_1546_pilon-augustus-gene-0.1-mRNA-1	no hit	no hit	0	0.96	2.11	T5+T10	0	0	0	ND.	--	--	--	--	--	--
maker-scaffold10x_1546_pilon-snap-gene-0.19-mRNA-1	A0A4E0RWQ9	A0A4E0RWQ9|A0A4E0RWQ9_FASHE_Zinc_finger_protein_OS=Fasciola_hepatica_OX=6192_GN=D915_001862_PE=4_SV=1	15.94	19.54	12.11	T0+T5+T10	0	0	0	ND.	--	-0.946581	-0.793378	--	--	--
maker-scaffold10x_1546_pilon-snap-gene-0.20-mRNA-1	A0A2H1CSF0	A0A2H1CSF0|A0A2H1CSF0_FASHE_Flavodoxin_OS=Fasciola_hepatica_OX=6192_GN=D915_001863_PE=4_SV=1	3.92	3.82	3.95	T0+T5+T10	0	0	0	ND.	--	-0.664779	--	--	--	--
maker-scaffold10x_1547_pilon-augustus-gene-0.33-mRNA-1	A0A4Z2CWN0	A0A4Z2CWN0|A0A4Z2CWN0_SCHJA_Dynamin-like_protein_OS=Schistosoma_japonicum_OX=6182_GN=EWB00_006839_PE=3_SV=1	6.64	9.61	17.65	T0+T5+T10	0	3.82	0	T5	--	0.74292	--	--	--	--
maker-scaffold10x_1547_pilon-snap-gene-0.11-mRNA-1	A0A4E0RDQ1	A0A4E0RDQ1|A0A4E0RDQ1_FASHE_Homeobox_domain-containing_protein_OS=Fasciola_hepatica_OX=6192_GN=D915_003596_PE=4_SV=1	0	2.03	1.27	T5+T10	0	0	0	ND.	4.60974	4.41188	--	--	--	--
maker-scaffold10x_1549_pilon-augustus-gene-0.48-mRNA-1	A0A5K3FQT4	A0A5K3FQT4|A0A5K3FQT4_9CEST_Cytochrome_b5_heme-binding_domain-containing_protein_OS=Mesocestoides_corti_OX=53468_PE=3_SV=1	112.1	83.91	74.6	T0+T5+T10	0	0	0	ND.	-0.818387	-1.06449	--	--	--	--
maker-scaffold10x_1549_pilon-augustus-gene-0.49-mRNA-1	A0A2H1C006	A0A2H1C006|A0A2H1C006_FASHE_Gelsolin_repeat_protein_OS=Fasciola_hepatica_OX=6192_GN=D915_008120_PE=4_SV=1	0.73	15.72	13.35	T0+T5+T10	0	0	0	ND.	4.29883	3.65161	--	--	--	--
maker-scaffold10x_1549_pilon-augustus-gene-0.57-mRNA-1	A0A419PHM0	A0A419PHM0|A0A419PHM0_CLOSI_Deleted_in_lung_and_esophageal_cancer_protein_1_(Fragment)_OS=Clonorchis_sinensis_OX=79923_GN=DLEC1_PE=4_SV=1	1.16	1.72	0.98	T0+T5+T10	0	0	0	ND.	--	--	--	--	--	--
maker-scaffold10x_1549_pilon-pred_gff_StringTie-gene-0.41-mRNA-1	A0A2H1CV23	A0A2H1CV23|A0A2H1CV23_FASHE_7_transmembrane_receptor_OS=Fasciola_hepatica_OX=6192_GN=D915_01089_PE=4_SV=1	0.05	0.25	0.41	T0+T5+T10	0	0	0	ND.	--	--	--	--	--	--
maker-scaffold10x_1549_pilon-snap-gene-0.82-mRNA-1	A0A4E0RJ35	A0A4E0RJ35|A0A4E0RJ35_FASHE_GDNF-inducible_zinc_finger_protein_1_OS=Fasciola_hepatica_OX=6192_GN=D915_001004_PE=4_SV=1	0.32	0.06	0.04	T0+T5+T10	0	0	0	ND.	--	-2.71332	--	--	--	--
maker-scaffold10x_1549_pilon-snap-gene-0.84-mRNA-1	A0A2H1CU16	A0A2H1CU16|A0A2H1CU16_FASHE_Actin_regulatory_protein_CAP-G_OS=Fasciola_hepatica_OX=6192_GN=D915_001001_PE=4_SV=1	2067.18	1266.16	849.86	T0+T5+T10	2491.38	2986.25	2890.51	T0+T5+T10	-1.22488	-2.03754	-0.748734	--	--	--
maker-scaffold10x_1549_pilon-snap-gene-0.86-mRNA-1	A0A2H1CHN0	A0A2H1CHN0|A0A2H1CHN0_FASHE_Ribosomal_protein_S10_OS=Fasciola_hepatica_OX=6192_GN=D915_003699_PE=3_SV=1	393.51	521.98	653.32	T0+T5+T10	1701.67	2422.8	1318.6	T0+T5+T10	--	--	--	--	--	--
maker-scaffold10x_1549_pilon-snap-gene-0.88-mRNA-1	A0A4E0RIS2	A0A4E0RIS2|A0A4E0RIS2_FASHE_Tetraspanin_OS=Fasciola_hepatica_OX=6192_GN=D915_003418_PE=3_SV=1	0.12	0	0	T0	0	0	0	ND.	--	--	--	--	--	--
maker-scaffold10x_1549_pilon-snap-gene-0.91-mRNA-1	A0A2H1CJG9	A0A2H1CJG9|A0A2H1CJG9_FASHE_Centrin_OS=Fasciola_hepatica_OX=6192_GN=D915_003415_PE=4_SV=1	0.41	0	0	T0	0	0	0	ND.	--	--	--	--	--	--
maker-scaffold10x_1549_pilon-snap-gene-0.95-mRNA-1	A0A504Z2J0	A0A504Z2J0|A0A504Z2J0_FASGI_Actin_protein_6_OS=Fasciola_gigantica_OX=46835_GN=FGIG_07470_PE=3_SV=1	14.34	27.01	33.03	T0+T5+T10	0	0	0	ND.	--	--	--	--	--	--
maker-scaffold10x_1549_pilon-snap-gene-0.96-mRNA-1	A0A4E0RQQ7	A0A4E0RQQ7|A0A4E0RQQ7_FASHE_Nucleoside_diphosphate-linked_moiety_X_motif_6_OS=Fasciola_hepatica_OX=6192_GN=D915_001002_PE=4_SV=1	50.15	124.73	135.13	T0+T5+T10	0	0	0	ND.	1.03388	0.804256	--	--	--	--
maker-scaffold10x_1549_pilon-snap-gene-0.97-mRNA-1	A0A419QFS5	A0A419QFS5|A0A419QFS5_CLOSI_WD_repeat-containing_protein_91_OS=Clonorchis_sinensis_OX=79923_GN=WDR91_PE=4_SV=1	42.4	74.34	105.61	T0+T5+T10	0	0	0	ND.	--	0.751673	--	--	--	--
maker-scaffold10x_1549_pilon-snap-gene-0.99-mRNA-1	A0A504YGC0	A0A504YGC0|A0A504YGC0_FASGI_Armadillo_type_fold_OS=Fasciola_gigantica_OX=46835_GN=FGIG_02540_PE=4_SV=1	12.3	15.45	27.15	T0+T5+T10	0	0	0	ND.	--	--	--	--	--	--
maker-scaffold10x_1552_pilon-snap-gene-0.4-mRNA-1	A0A4E0R592	A0A4E0R592|A0A4E0R592_FASHE_MHD_domain-containing_protein_OS=Fasciola_hepatica_OX=6192_GN=D915_007722_PE=4_SV=1	12.96	15.15	9.64	T0+T5+T10	0	0	0	ND.	--	-1.06345	--	--	--	--
maker-scaffold10x_1555_pilon-augustus-gene-0.9-mRNA-1	A0A504ZCD4	A0A504ZCD4|A0A504ZCD4_FASGI_Protein_phosphatase_1_regulatory_subunit_37_OS=Fasciola_gigantica_OX=46835_GN=FGIG_09275_PE=4_SV=1	4.69	11.29	15.05	T0+T5+T10	0	0	0	ND.	--	0.882	--	--	--	--
maker-scaffold10x_1555_pilon-snap-gene-0.3-mRNA-1	A0A504ZA63	A0A504ZA63|A0A504ZA63_FASGI_MaoC-like_domain-containing_protein_OS=Fasciola_gigantica_OX=46835_GN=FGIG_09274_PE=4_SV=1	20.79	52.49	97.45	T0+T5+T10	0	0	0	ND.	--	1.58266	--	--	--	--
maker-scaffold10x_1560_pilon-augustus-gene-0.10-mRNA-1	A0A3R7FLS0	A0A3R7FLS0|A0A3R7FLS0_CLOSI_Protein_FAM98A_OS=Clonorchis_sinensis_OX=79923_GN=Fam98a_PE=4_SV=1	18.15	25.27	23.46	T0+T5+T10	0	26.36	0	T5	--	--	--	--	--	-3.14419
maker-scaffold10x_1561_pilon-augustus-gene-0.7-mRNA-1	no hit	no hit	10.71	14.29	20.85	T0+T5+T10	0	0	0	ND.	--	--	--	--	--	--
maker-scaffold10x_1561_pilon-snap-gene-0.22-mRNA-1	A0A2H1C069	A0A2H1C069|A0A2H1C069_FASHE_PX_domain-containing_protein_(Fragment)_OS=Fasciola_hepatica_OX=6192_GN=D915_12288_PE=4_SV=1	766.81	554.41	382.39	T0+T5+T10	0	0	0	ND.	-0.926771	-1.57748	--	--	--	--
maker-scaffold10x_1561_pilon-snap-gene-0.23-mRNA-1	no hit	no hit	23.8	26.93	18.21	T0+T5+T10	0	0	0	ND.	--	--	--	--	--	--
maker-scaffold10x_1561_pilon-snap-gene-0.26-mRNA-1	A0A4E0RUS7	A0A4E0RUS7|A0A4E0RUS7_FASHE_Leucine-rich_repeat-containing_protein_67_OS=Fasciola_hepatica_OX=6192_GN=D915_008131_PE=4_SV=1	12.72	17.56	20.74	T0+T5+T10	0	0	0	ND.	--	--	--	--	--	--
maker-scaffold10x_1561_pilon-snap-gene-0.27-mRNA-1	no hit	no hit	0.16	0	0.34	T0+T10	0	0	0	ND.	--	--	5.86902	--	--	--
maker-scaffold10x_1561_pilon-snap-gene-0.28-mRNA-1	A0A2H1BYN6	A0A2H1BYN6|A0A2H1BYN6_FASHE_Coiled-coil-helix-coiled-coil-helix_domain-containing_protein_1_OS=Fasciola_hepatica_OX=6192_GN=D915_008506_PE=4_SV=1	24.31	18.9	35.69	T0+T5+T10	0	0	0	ND.	-0.997237	--	0.909949	--	--	--
maker-scaffold10x_1566_pilon-snap-gene-0.18-mRNA-1	no hit	no hit	1.58	2.18	3.58	T0+T5+T10	0	0	0	ND.	--	--	--	--	--	--
maker-scaffold10x_1566_pilon-snap-gene-0.19-mRNA-1	A0A074Z204	A0A074Z204|A0A074Z204_9TREM_GTP-binding_domain_protein_OS=Opisthorchis_viverrini_OX=6198_GN=T265_10564_PE=4_SV=1	89.2	20.24	7.6	T0+T5+T10	0	0	0	ND.	-2.71397	-3.77411	--	--	--	--
maker-scaffold10x_1566_pilon-snap-gene-0.20-mRNA-1	A0A4E0RBH4	A0A4E0RBH4|A0A4E0RBH4_FASHE_DAGKc_domain-containing_protein_OS=Fasciola_hepatica_OX=6192_GN=D915_005871_PE=4_SV=1	15.69	22.05	22.21	T0+T5+T10	0	0	0	ND.	--	--	--	--	--	--
maker-scaffold10x_1566_pilon-snap-gene-0.21-mRNA-1	A0A504ZC60	A0A504ZC60|A0A504ZC60_FASGI_E3_ubiquitin-protein_ligase_OS=Fasciola_gigantica_OX=46835_GN=FGIG_00471_PE=3_SV=1	2.48	3.91	4.23	T0+T5+T10	0	0	0	ND.	--	--	--	--	--	--
maker-scaffold10x_1566_pilon-snap-gene-0.23-mRNA-1	A0A2H1CIH4	A0A2H1CIH4|A0A2H1CIH4_FASHE_Zinc_finger_protein_OS=Fasciola_hepatica_OX=6192_GN=D915_003244_PE=4_SV=1	20.59	30.84	29.13	T0+T5+T10	0	0	0	ND.	--	--	--	--	--	--
maker-scaffold10x_1568_pilon-augustus-gene-0.43-mRNA-1	A0A4E0R112	A0A4E0R112|A0A4E0R112_FASHE_Transmembrane_and_TPR_repeat-containing_protein_3_OS=Fasciola_hepatica_OX=6192_GN=D915_007522_PE=4_SV=1	12.93	24.27	41.53	T0+T5+T10	0	0	0	ND.	--	0.922086	--	--	--	--
maker-scaffold10x_1568_pilon-snap-gene-0.0-mRNA-1	A0A4E0RHY2	A0A4E0RHY2|A0A4E0RHY2_FASHE_Rad_and_Gem_GTP_binding_protein_1_OS=Fasciola_hepatica_OX=6192_GN=D915_002099_PE=4_SV=1	1.04	0.34	0.38	T0+T5+T10	0	0	0	ND.	--	--	--	--	--	--
maker-scaffold10x_1568_pilon-snap-gene-0.1-mRNA-1	A0A4E0RDV7	A0A4E0RDV7|A0A4E0RDV7_FASHE_Vesicle-associated_membrane_protein_7_OS=Fasciola_hepatica_OX=6192_GN=D915_002216_PE=4_SV=1	265.81	231.01	200.81	T0+T5+T10	0	0	0	ND.	-0.609216	-1.03659	--	--	--	--
maker-scaffold10x_1568_pilon-snap-gene-0.2-mRNA-1	A0A4E0QUS6	A0A4E0QUS6|A0A4E0QUS6_FASHE_DNA_excision_repair_protein_ERCC-8_OS=Fasciola_hepatica_OX=6192_GN=D915_010127_PE=4_SV=1	5.69	7.67	17.22	T0+T5+T10	0	0	0	ND.	--	1.15451	--	--	--	--
maker-scaffold10x_1568_pilon-snap-gene-0.3-mRNA-1	no hit	no hit	72.98	173.87	252.12	T0+T5+T10	0	0	0	ND.	0.821844	1.07444	--	--	--	--
maker-scaffold10x_1568_pilon-snap-gene-0.4-mRNA-1	A0A4E0R788	A0A4E0R788|A0A4E0R788_FASHE_DNA_excision_repair_protein_ERCC-6_OS=Fasciola_hepatica_OX=6192_GN=D915_005829_PE=4_SV=1	20.74	31.99	29.02	T0+T5+T10	0	0	0	ND.	--	--	--	--	--	--
maker-scaffold10x_1568_pilon-snap-gene-0.6-mRNA-1	A0A4E0RKN2	A0A4E0RKN2|A0A4E0RKN2_FASHE_Importin_subunit_alpha_OS=Fasciola_hepatica_OX=6192_GN=D915_002097_PE=3_SV=1	107.5	243.31	338.18	T0+T5+T10	0	51.91	23.82	T5+T10	0.735302	0.763247	--	--	--	--
maker-scaffold10x_1568_pilon-snap-gene-0.7-mRNA-1	A0A2H1CP30	A0A2H1CP30|A0A2H1CP30_FASHE_TGF_BETA_2_domain-containing_protein_OS=Fasciola_hepatica_OX=6192_GN=D915_002217_PE=3_SV=1	1.51	1.68	2.43	T0+T5+T10	0	0	0	ND.	--	--	--	--	--	--
maker-scaffold10x_1568_pilon-snap-gene-0.8-mRNA-1	A0A4E0RK85	A0A4E0RK85|A0A4E0RK85_FASHE_Rho_GTPase_activating_protein_24_OS=Fasciola_hepatica_OX=6192_GN=D915_002218_PE=4_SV=1	15.41	17.1	14.69	T0+T5+T10	0	0	0	ND.	--	-0.610916	--	--	--	--
maker-scaffold10x_1569_pilon-augustus-gene-0.36-mRNA-1	K7F057	K7F057|K7F057_PELSI_Calmodulin_like_3_OS=Pelodiscus_sinensis_OX=13735_GN=CALML3_PE=3_SV=1	1211.41	904.11	561.54	T0+T5+T10	0	0	0	ND.	-0.924977	-1.75105	-0.761201	--	--	--
maker-scaffold10x_1569_pilon-snap-gene-0.0-mRNA-1	no hit	no hit	0.07	0	0	T0	0	0	0	ND.	--	--	--	--	--	--
maker-scaffold10x_1569_pilon-snap-gene-0.1-mRNA-1	A0A4E0RH42	A0A4E0RH42|A0A4E0RH42_FASHE_Transmembrane_protein_OS=Fasciola_hepatica_OX=6192_GN=D915_002837_PE=4_SV=1	33.35	39.02	50.34	T0+T5+T10	0	0	0	ND.	--	--	--	--	--	--
[truncated: 5,775 more rows]

## Sheet: Peptidases
GO RELATED PEPTIDASES					Putative proteolytic activity			Transcriptomics data results				Proteomics data results				Transcriptomics data results - statistically significant changes (adjusted P-value cut-off 0.05)			Proteomics data results - statistically significant changes (adjusted P-value cut-off 0.05)
[truncated: 147 more rows]
