# Supplementary material for: Transcriptome and proteome dynamics during the embryonation of Fasciola hepatica eggs
Source: Research Square preprint supplement (doi:10.21203/rs.3.rs-850551/v1), 2021-09-07
Supplement: Supplementary file 3 [file e18959e3c921b429a5faf511.xlsx]

## Sheet: UniProt homologues
F. hepatica protein ID	UniProt protein	UniProt ID	Identical matches (%)	Expected value	Bit score	Query coverage per HSP	Subject coverage per HSP
maker-scaffold10x_1453_pilon-snap-gene-0.14-mRNA-1_transcript=maker-scaffold10x_1453_pilon-snap-gene-0.14-mRNA-1_gene=maker-scaffold10x_1453_pilon-snap-gene-0.14	A0A023JCY2|A0A023JCY2_9TREM_Taurocyamine_kinase_OS=Fasciola_sp,_TA-2014_OX=1454228_PE=2_SV=1	A0A023JCY2	98.3	0	1438.3	100	100
maker-scaffold10x_2706_pilon-snap-gene-0.16-mRNA-1_transcript=maker-scaffold10x_2706_pilon-snap-gene-0.16-mRNA-1_gene=maker-scaffold10x_2706_pilon-snap-gene-0.16	A0A068LJN3|A0A068LJN3_FASHE_Glyceraldehyde-3-phosphate_dehydrogenase_OS=Fasciola_hepatica_OX=6192_GN=GAPDH_PE=2_SV=1	A0A068LJN3	100	3.5e-194	686.4	100	100
maker-scaffold10x_813_pilon-snap-gene-0.70-mRNA-1_transcript=maker-scaffold10x_813_pilon-snap-gene-0.70-mRNA-1_gene=maker-scaffold10x_813_pilon-snap-gene-0.70	A0A068W9L2|A0A068W9L2_ECHGR_Dynein_light_chain_OS=Echinococcus_granulosus_OX=6210_GN=EgrG_000941000_PE=4_SV=1	A0A068W9L2	69.6	1.2e-69	272.7	58.8	95.9
maker-scaffold10x_1326_pilon-snap-gene-0.57-mRNA-1_transcript=maker-scaffold10x_1326_pilon-snap-gene-0.57-mRNA-1_gene=maker-scaffold10x_1326_pilon-snap-gene-0.57	A0A068WIN3|A0A068WIN3_ECHGR_Sodium_channel_nonvoltage_gated_1_alpha_OS=Echinococcus_granulosus_OX=6210_GN=EgrG_000603400_PE=3_SV=1	A0A068WIN3	36	3e-81	312	91.4	65.8
maker-scaffold10x_56_pilon-augustus-gene-0.83-mRNA-1_transcript=maker-scaffold10x_56_pilon-augustus-gene-0.83-mRNA-1_gene=maker-scaffold10x_56_pilon-augustus-gene-0.83	A0A068WUQ7|A0A068WUQ7_ECHGR_Apoptosis_protein_3_OS=Echinococcus_granulosus_OX=6210_GN=EgrG_000040350_PE=4_SV=1	A0A068WUQ7	31.4	2.4e-19	105.1	78.5	89.9
maker-scaffold10x_92_pilon-snap-gene-0.32-mRNA-1_transcript=maker-scaffold10x_92_pilon-snap-gene-0.32-mRNA-1_gene=maker-scaffold10x_92_pilon-snap-gene-0.32	A0A068WV49|A0A068WV49_ECHGR_Expressed_conserved_protein_OS=Echinococcus_granulosus_OX=6210_GN=EgrG_000353700_PE=4_SV=1	A0A068WV49	29.1	4.7e-10	73.9	77.1	64.9
maker-scaffold10x_158_pilon-snap-gene-0.54-mRNA-1_transcript=maker-scaffold10x_158_pilon-snap-gene-0.54-mRNA-1_gene=maker-scaffold10x_158_pilon-snap-gene-0.54	A0A068WYN8|A0A068WYN8_ECHGR_RNA_directed_DNA_polymerase_reverse_transcriptase_OS=Echinococcus_granulosus_OX=6210_GN=EgrG_000864400_PE=4_SV=1	A0A068WYN8	27.9	1.1e-09	73.2	73.5	16.9
maker-scaffold10x_253_pilon-snap-gene-0.149-mRNA-1_transcript=maker-scaffold10x_253_pilon-snap-gene-0.149-mRNA-1_gene=maker-scaffold10x_253_pilon-snap-gene-0.149	A0A074YZX5|A0A074YZX5_9TREM_PHB_domain-containing_protein_(Fragment)_OS=Opisthorchis_viverrini_OX=6198_GN=T265_15370_PE=4_SV=1	A0A074YZX5	92.2	1.3e-92	348.2	100	12.1
maker-scaffold10x_1566_pilon-snap-gene-0.19-mRNA-1_transcript=maker-scaffold10x_1566_pilon-snap-gene-0.19-mRNA-1_gene=maker-scaffold10x_1566_pilon-snap-gene-0.19	A0A074Z204|A0A074Z204_9TREM_GTP-binding_domain_protein_OS=Opisthorchis_viverrini_OX=6198_GN=T265_10564_PE=4_SV=1	A0A074Z204	57.3	3.2e-56	227.3	100	99.5
maker-scaffold10x_25_pilon-snap-gene-0.27-mRNA-1_transcript=maker-scaffold10x_25_pilon-snap-gene-0.27-mRNA-1_gene=maker-scaffold10x_25_pilon-snap-gene-0.27	A0A074Z230|A0A074Z230_9TREM_DiGeorge_syndrome_critical_region_6_protein_OS=Opisthorchis_viverrini_OX=6198_GN=T265_10498_PE=4_SV=1	A0A074Z230	69	7.3e-34	152.5	85.3	49.6
maker-scaffold10x_200_pilon-snap-gene-0.132-mRNA-1_transcript=maker-scaffold10x_200_pilon-snap-gene-0.132-mRNA-1_gene=maker-scaffold10x_200_pilon-snap-gene-0.132	A0A074Z3A9|A0A074Z3A9_9TREM_UPAR/Ly6_domain-containing_protein_OS=Opisthorchis_viverrini_OX=6198_GN=T265_10188_PE=4_SV=1	A0A074Z3A9	51.9	1.8e-14	87.4	90.6	53.8
maker-scaffold10x_426_pilon-augustus-gene-0.2-mRNA-1_transcript=maker-scaffold10x_426_pilon-augustus-gene-0.2-mRNA-1_gene=maker-scaffold10x_426_pilon-augustus-gene-0.2	A0A074Z4R2|A0A074Z4R2_9TREM_Ig-like_domain-containing_protein_OS=Opisthorchis_viverrini_OX=6198_GN=T265_09758_PE=4_SV=1	A0A074Z4R2	41.2	1.7e-24	121.7	79.5	18.5
augustus_masked-scaffold10x_839_pilon-processed-gene-0.13-mRNA-1_transcript=augustus_masked-scaffold10x_839_pilon-processed-gene-0.13-mRNA-1_gene=augustus_masked-scaffold10x_839_pilon-processed-gene-0.13	A0A074Z759|A0A074Z759_9TREM_Reverse_transcriptase_domain-containing_protein_(Fragment)_OS=Opisthorchis_viverrini_OX=6198_GN=T265_14748_PE=4_SV=1	A0A074Z759	81	0	1309.3	100	84.6
maker-scaffold10x_61_pilon-snap-gene-0.33-mRNA-1_transcript=maker-scaffold10x_61_pilon-snap-gene-0.33-mRNA-1_gene=maker-scaffold10x_61_pilon-snap-gene-0.33	A0A074Z9C7|A0A074Z9C7_9TREM_DUF4201_domain-containing_protein_(Fragment)_OS=Opisthorchis_viverrini_OX=6198_GN=T265_14561_PE=4_SV=1	A0A074Z9C7	26	8e-08	66.6	89.3	57.5
maker-scaffold10x_908_pilon-augustus-gene-1.126-mRNA-1_transcript=maker-scaffold10x_908_pilon-augustus-gene-1.126-mRNA-1_gene=maker-scaffold10x_908_pilon-augustus-gene-1.126	A0A074Z9H9|A0A074Z9H9_9TREM_Reverse_transcriptase_domain-containing_protein_OS=Opisthorchis_viverrini_OX=6198_GN=T265_11429_PE=4_SV=1	A0A074Z9H9	29.7	1e-21	113.6	96.4	93.7
maker-scaffold10x_263_pilon-snap-gene-0.22-mRNA-1_transcript=maker-scaffold10x_263_pilon-snap-gene-0.22-mRNA-1_gene=maker-scaffold10x_263_pilon-snap-gene-0.22	A0A074Z9I0|A0A074Z9I0_9TREM_Apple_domain-containing_protein_OS=Opisthorchis_viverrini_OX=6198_GN=T265_08420_PE=4_SV=1	A0A074Z9I0	30.8	2.4e-67	265.8	94.4	90.6
maker-scaffold10x_296_pilon-snap-gene-0.33-mRNA-1_transcript=maker-scaffold10x_296_pilon-snap-gene-0.33-mRNA-1_gene=maker-scaffold10x_296_pilon-snap-gene-0.33	A0A074ZAP3|A0A074ZAP3_9TREM_Dipeptidyl_peptidase_3_OS=Opisthorchis_viverrini_OX=6198_GN=T265_09337_PE=3_SV=1	A0A074ZAP3	72.2	2e-53	217.6	100	19.7
maker-scaffold10x_724_pilon-snap-gene-0.113-mRNA-1_transcript=maker-scaffold10x_724_pilon-snap-gene-0.113-mRNA-1_gene=maker-scaffold10x_724_pilon-snap-gene-0.113	A0A074ZC16|A0A074ZC16_9TREM_VHS_domain-containing_protein_OS=Opisthorchis_viverrini_OX=6198_GN=T265_07711_PE=4_SV=1	A0A074ZC16	45.7	3.3e-74	288.1	100	94.1
maker-scaffold10x_885_pilon-snap-gene-0.48-mRNA-1_transcript=maker-scaffold10x_885_pilon-snap-gene-0.48-mRNA-1_gene=maker-scaffold10x_885_pilon-snap-gene-0.48	A0A074ZEP4|A0A074ZEP4_9TREM_Protein_kinase_domain-containing_protein_OS=Opisthorchis_viverrini_OX=6198_GN=T265_08126_PE=4_SV=1	A0A074ZEP4	80.4	6e-85	322.8	97	20.2
maker-scaffold10x_873_pilon-snap-gene-0.68-mRNA-1_transcript=maker-scaffold10x_873_pilon-snap-gene-0.68-mRNA-1_gene=maker-scaffold10x_873_pilon-snap-gene-0.68	A0A074ZKF2|A0A074ZKF2_9TREM_Integrase_catalytic_domain-containing_protein_(Fragment)_OS=Opisthorchis_viverrini_OX=6198_GN=T265_14560_PE=4_SV=1	A0A074ZKF2	30.9	2.8e-102	382.9	82.5	64.5
maker-scaffold10x_441_pilon-augustus-gene-0.17-mRNA-1_transcript=maker-scaffold10x_441_pilon-augustus-gene-0.17-mRNA-1_gene=maker-scaffold10x_441_pilon-augustus-gene-0.17	A0A074ZKU2|A0A074ZKU2_9TREM_Ras-GEF_domain-containing_protein_OS=Opisthorchis_viverrini_OX=6198_GN=T265_05088_PE=4_SV=1	A0A074ZKU2	29.7	2.3e-39	172.9	92.2	57.7
maker-scaffold10x_524_pilon-augustus-gene-0.1-mRNA-1_transcript=maker-scaffold10x_524_pilon-augustus-gene-0.1-mRNA-1_gene=maker-scaffold10x_524_pilon-augustus-gene-0.1	A0A074ZMP6|A0A074ZMP6_9TREM_Glyco_18_domain-containing_protein_OS=Opisthorchis_viverrini_OX=6198_GN=T265_05807_PE=4_SV=1	A0A074ZMP6	47.5	3.9e-83	317.4	92.8	93.5
maker-scaffold10x_201_pilon-snap-gene-0.2-mRNA-1_transcript=maker-scaffold10x_201_pilon-snap-gene-0.2-mRNA-1_gene=maker-scaffold10x_201_pilon-snap-gene-0.2	A0A074ZNT9|A0A074ZNT9_9TREM_Hsp90_protein_OS=Opisthorchis_viverrini_OX=6198_GN=T265_07448_PE=3_SV=1	A0A074ZNT9	73.6	6e-274	952.6	83.4	91.5
maker-scaffold10x_145_pilon-augustus-gene-0.102-mRNA-1_transcript=maker-scaffold10x_145_pilon-augustus-gene-0.102-mRNA-1_gene=maker-scaffold10x_145_pilon-augustus-gene-0.102	A0A074ZTY3|A0A074ZTY3_9TREM_SH2_domain-containing_protein_OS=Opisthorchis_viverrini_OX=6198_GN=T265_05987_PE=4_SV=1	A0A074ZTY3	31.8	3.2e-119	439.5	90.1	64.6
maker-scaffold10x_45_pilon-augustus-gene-0.28-mRNA-1_transcript=maker-scaffold10x_45_pilon-augustus-gene-0.28-mRNA-1_gene=maker-scaffold10x_45_pilon-augustus-gene-0.28	A0A074ZUS4|A0A074ZUS4_9TREM_Reverse_transcriptase_domain-containing_protein_OS=Opisthorchis_viverrini_OX=6198_GN=T265_03798_PE=4_SV=1	A0A074ZUS4	42.6	2.7e-29	139	59.1	25.1
maker-scaffold10x_145_pilon-augustus-gene-0.98-mRNA-1_transcript=maker-scaffold10x_145_pilon-augustus-gene-0.98-mRNA-1_gene=maker-scaffold10x_145_pilon-augustus-gene-0.98	A0A074ZVF4|A0A074ZVF4_9TREM_Reverse_transcriptase_domain-containing_protein_(Fragment)_OS=Opisthorchis_viverrini_OX=6198_GN=T265_13820_PE=4_SV=1	A0A074ZVF4	47.2	1.7e-119	439.5	86	49.7
maker-scaffold10x_432_pilon-augustus-gene-0.65-mRNA-1_transcript=maker-scaffold10x_432_pilon-augustus-gene-0.65-mRNA-1_gene=maker-scaffold10x_432_pilon-augustus-gene-0.65	A0A074ZW37|A0A074ZW37_9TREM_EF_hand_OS=Opisthorchis_viverrini_OX=6198_GN=T265_11810_PE=4_SV=1	A0A074ZW37	92.7	4.1e-22	112.8	63.2	31.4
maker-scaffold10x_1373_pilon-snap-gene-0.92-mRNA-1_transcript=maker-scaffold10x_1373_pilon-snap-gene-0.92-mRNA-1_gene=maker-scaffold10x_1373_pilon-snap-gene-0.92	A0A074ZWX9|A0A074ZWX9_9TREM_OBG-type_G_domain-containing_protein_OS=Opisthorchis_viverrini_OX=6198_GN=T265_05208_PE=4_SV=1	A0A074ZWX9	62.4	1.8e-150	541.6	98.2	98.4
maker-scaffold10x_90_pilon-augustus-gene-0.129-mRNA-1_transcript=maker-scaffold10x_90_pilon-augustus-gene-0.129-mRNA-1_gene=maker-scaffold10x_90_pilon-augustus-gene-0.129	A0A074ZYJ3|A0A074ZYJ3_9TREM_SMC_hinge_domain-containing_protein_OS=Opisthorchis_viverrini_OX=6198_GN=T265_01410_PE=4_SV=1	A0A074ZYJ3	74.3	0	1381.3	98	69.1
snap_masked-scaffold10x_266_pilon-processed-gene-0.0-mRNA-1_transcript=snap_masked-scaffold10x_266_pilon-processed-gene-0.0-mRNA-1_gene=snap_masked-scaffold10x_266_pilon-processed-gene-0.0	A0A074ZYK6|A0A074ZYK6_9TREM_BOP1NT_domain-containing_protein_OS=Opisthorchis_viverrini_OX=6198_GN=T265_04726_PE=3_SV=1	A0A074ZYK6	47.3	4.2e-05	56.2	92.5	3.2
maker-scaffold10x_120_pilon-snap-gene-0.21-mRNA-1_transcript=maker-scaffold10x_120_pilon-snap-gene-0.21-mRNA-1_gene=maker-scaffold10x_120_pilon-snap-gene-0.21	A0A075A0F3|A0A075A0F3_9TREM_SOCS_box_domain-containing_protein_OS=Opisthorchis_viverrini_OX=6198_GN=T265_02086_PE=4_SV=1	A0A075A0F3	34.6	7.7e-32	147.5	64.3	67.2
maker-scaffold10x_19_pilon-snap-gene-0.94-mRNA-1_transcript=maker-scaffold10x_19_pilon-snap-gene-0.94-mRNA-1_gene=maker-scaffold10x_19_pilon-snap-gene-0.94	A0A075A0F8|A0A075A0F8_9TREM_TIR_domain-containing_protein_OS=Opisthorchis_viverrini_OX=6198_GN=T265_02093_PE=4_SV=1	A0A075A0F8	29.6	4.5e-32	147.9	97	45.4
maker-scaffold10x_1124_pilon-snap-gene-0.45-mRNA-1_transcript=maker-scaffold10x_1124_pilon-snap-gene-0.45-mRNA-1_gene=maker-scaffold10x_1124_pilon-snap-gene-0.45	A0A075A1K1|A0A075A1K1_9TREM_Reverse_transcriptase_domain-containing_protein_OS=Opisthorchis_viverrini_OX=6198_GN=T265_10371_PE=4_SV=1	A0A075A1K1	32.4	8.3e-60	241.1	93.7	32
maker-scaffold10x_14_pilon-snap-gene-0.134-mRNA-1_transcript=maker-scaffold10x_14_pilon-snap-gene-0.134-mRNA-1_gene=maker-scaffold10x_14_pilon-snap-gene-0.134	A0A075A1T1|A0A075A1T1_9TREM_Methyltransf_11_domain-containing_protein_OS=Opisthorchis_viverrini_OX=6198_GN=T265_03889_PE=4_SV=1	A0A075A1T1	33.9	7.1e-69	271.2	83.4	58.3
maker-scaffold10x_1332_pilon-snap-gene-0.35-mRNA-1_transcript=maker-scaffold10x_1332_pilon-snap-gene-0.35-mRNA-1_gene=maker-scaffold10x_1332_pilon-snap-gene-0.35	A0A075A3Z8|A0A075A3Z8_9TREM_PITH_domain-containing_protein_OS=Opisthorchis_viverrini_OX=6198_GN=T265_00258_PE=4_SV=1	A0A075A3Z8	46.3	2.2e-188	668.3	83.2	41.2
maker-scaffold10x_101_pilon-pred_gff_StringTie-gene-0.9-mRNA-1_transcript=maker-scaffold10x_101_pilon-pred_gff_StringTie-gene-0.9-mRNA-1_gene=maker-scaffold10x_101_pilon-pred_gff_StringTie-gene-0.9	A0A075A4Y5|A0A075A4Y5_9TREM_Integrase_catalytic_domain-containing_protein_OS=Opisthorchis_viverrini_OX=6198_GN=T265_09435_PE=4_SV=1	A0A075A4Y5	42.5	1.4e-80	309.7	77	12.3
maker-scaffold10x_1056_pilon-pred_gff_StringTie-gene-0.13-mRNA-1_transcript=maker-scaffold10x_1056_pilon-pred_gff_StringTie-gene-0.13-mRNA-1_gene=maker-scaffold10x_1056_pilon-pred_gff_StringTie-gene-0.13	A0A075A4Y5|A0A075A4Y5_9TREM_Integrase_catalytic_domain-containing_protein_OS=Opisthorchis_viverrini_OX=6198_GN=T265_09435_PE=4_SV=1	A0A075A4Y5	46.2	7e-58	233.8	70.7	8.7
maker-scaffold10x_503_pilon-snap-gene-0.89-mRNA-1_transcript=maker-scaffold10x_503_pilon-snap-gene-0.89-mRNA-1_gene=maker-scaffold10x_503_pilon-snap-gene-0.89	A0A075A4Y5|A0A075A4Y5_9TREM_Integrase_catalytic_domain-containing_protein_OS=Opisthorchis_viverrini_OX=6198_GN=T265_09435_PE=4_SV=1	A0A075A4Y5	25.1	2e-139	506.9	78	53.3
maker-scaffold10x_179_pilon-snap-gene-0.11-mRNA-1_transcript=maker-scaffold10x_179_pilon-snap-gene-0.11-mRNA-1_gene=maker-scaffold10x_179_pilon-snap-gene-0.11	A0A075A5J9|A0A075A5J9_9TREM_Ig-like_domain-containing_protein_(Fragment)_OS=Opisthorchis_viverrini_OX=6198_GN=T265_12561_PE=4_SV=1	A0A075A5J9	62.5	1.8e-119	438.3	95.2	99.4
maker-scaffold10x_158_pilon-snap-gene-0.41-mRNA-1_transcript=maker-scaffold10x_158_pilon-snap-gene-0.41-mRNA-1_gene=maker-scaffold10x_158_pilon-snap-gene-0.41	A0A075A693|A0A075A693_9TREM_Glycine_cleavage_system_H_protein_OS=Opisthorchis_viverrini_OX=6198_GN=T265_09049_PE=3_SV=1	A0A075A693	66.7	1.7e-42	181.4	85.4	62.4
maker-scaffold10x_329_pilon-snap-gene-0.6-mRNA-1_transcript=maker-scaffold10x_329_pilon-snap-gene-0.6-mRNA-1_gene=maker-scaffold10x_329_pilon-snap-gene-0.6	A0A075A9F4|A0A075A9F4_9TREM_Rhodanese_domain-containing_protein_OS=Opisthorchis_viverrini_OX=6198_GN=T265_08127_PE=4_SV=1	A0A075A9F4	50.9	1.3e-256	895.2	98.7	98.3
maker-scaffold10x_149_pilon-snap-gene-0.107-mRNA-1_transcript=maker-scaffold10x_149_pilon-snap-gene-0.107-mRNA-1_gene=maker-scaffold10x_149_pilon-snap-gene-0.107	A0A075AHF4|A0A075AHF4_9TREM_Alpha-1,4_glucan_phosphorylase_OS=Opisthorchis_viverrini_OX=6198_GN=T265_03696_PE=3_SV=1	A0A075AHF4	72.4	0	1303.1	99.2	98.5
maker-scaffold10x_599_pilon-augustus-gene-0.15-mRNA-1_transcript=maker-scaffold10x_599_pilon-augustus-gene-0.15-mRNA-1_gene=maker-scaffold10x_599_pilon-augustus-gene-0.15	A0A075AIZ8|A0A075AIZ8_9TREM_Reverse_transcriptase_domain-containing_protein_OS=Opisthorchis_viverrini_OX=6198_GN=T265_01387_PE=4_SV=1	A0A075AIZ8	36.5	1.6e-44	190.3	47.3	24
maker-scaffold10x_663_pilon-snap-gene-0.22-mRNA-1_transcript=maker-scaffold10x_663_pilon-snap-gene-0.22-mRNA-1_gene=maker-scaffold10x_663_pilon-snap-gene-0.22	A0A087VX35|A0A087VX35_ECHMU_rRNA_promoter_binding_protein_OS=Echinococcus_multilocularis_OX=6211_GN=EmuJ_000051500_PE=4_SV=2	A0A087VX35	62.8	8.1e-21	110.5	22.6	29.3
maker-scaffold10x_147_pilon-pred_gff_StringTie-gene-0.63-mRNA-1_transcript=maker-scaffold10x_147_pilon-pred_gff_StringTie-gene-0.63-mRNA-1_gene=maker-scaffold10x_147_pilon-pred_gff_StringTie-gene-0.63	A0A094ZCX7|A0A094ZCX7_SCHHA_Dynactin_subunit_5_OS=Schistosoma_haematobium_OX=6185_GN=MS3_10676_PE=4_SV=1	A0A094ZCX7	90.3	2.5e-69	270.8	100	100
maker-scaffold10x_1628_pilon-snap-gene-0.4-mRNA-1_transcript=maker-scaffold10x_1628_pilon-snap-gene-0.4-mRNA-1_gene=maker-scaffold10x_1628_pilon-snap-gene-0.4	A0A094ZE44|A0A094ZE44_SCHHA_Hemicentin-2_OS=Schistosoma_haematobium_OX=6185_GN=MS3_00745_PE=4_SV=1	A0A094ZE44	27.2	8.3e-115	424.9	71.1	72.7
maker-scaffold10x_802_pilon-snap-gene-0.46-mRNA-1_transcript=maker-scaffold10x_802_pilon-snap-gene-0.46-mRNA-1_gene=maker-scaffold10x_802_pilon-snap-gene-0.46	A0A094ZH79|A0A094ZH79_SCHHA_ANK_REP_REGION_domain-containing_protein_OS=Schistosoma_haematobium_OX=6185_GN=MS3_02029_PE=4_SV=1	A0A094ZH79	32.9	5.5e-61	244.6	92.2	43.1
maker-scaffold10x_830_pilon-snap-gene-0.19-mRNA-1_transcript=maker-scaffold10x_830_pilon-snap-gene-0.19-mRNA-1_gene=maker-scaffold10x_830_pilon-snap-gene-0.19	A0A094ZHT9|A0A094ZHT9_SCHHA_Meckel_syndrome_type_1_protein-like_protein_OS=Schistosoma_haematobium_OX=6185_GN=MS3_02284_PE=4_SV=1	A0A094ZHT9	37.8	4.8e-33	150.6	75.4	92.9
maker-scaffold10x_2721_pilon-augustus-gene-0.2-mRNA-1_transcript=maker-scaffold10x_2721_pilon-augustus-gene-0.2-mRNA-1_gene=maker-scaffold10x_2721_pilon-augustus-gene-0.2	A0A094ZIA0|A0A094ZIA0_SCHHA_DDB1-and_CUL4-associated_factor_13_OS=Schistosoma_haematobium_OX=6185_GN=MS3_01860_PE=4_SV=1	A0A094ZIA0	83.2	2.8e-92	347.4	76.8	51.5
maker-scaffold10x_602_pilon-snap-gene-0.34-mRNA-1_transcript=maker-scaffold10x_602_pilon-snap-gene-0.34-mRNA-1_gene=maker-scaffold10x_602_pilon-snap-gene-0.34	A0A094ZJQ3|A0A094ZJQ3_SCHHA_Nitric_oxide-associated_protein_1_OS=Schistosoma_haematobium_OX=6185_GN=MS3_03060_PE=4_SV=1	A0A094ZJQ3	28.2	3.3e-17	98.6	60.3	25.6
maker-scaffold10x_602_pilon-snap-gene-0.44-mRNA-1_transcript=maker-scaffold10x_602_pilon-snap-gene-0.44-mRNA-1_gene=maker-scaffold10x_602_pilon-snap-gene-0.44	A0A094ZL57|A0A094ZL57_SCHHA_RING-box_protein_1A_OS=Schistosoma_haematobium_OX=6185_GN=MS3_02947_PE=4_SV=1	A0A094ZL57	59.3	1.3e-82	315.5	98.5	100
maker-scaffold10x_1304_pilon-augustus-gene-0.5-mRNA-1_transcript=maker-scaffold10x_1304_pilon-augustus-gene-0.5-mRNA-1_gene=maker-scaffold10x_1304_pilon-augustus-gene-0.5	A0A094ZL85|A0A094ZL85_SCHHA_Protein_FAM221A_(Fragment)_OS=Schistosoma_haematobium_OX=6185_GN=MS3_02961_PE=4_SV=1	A0A094ZL85	73.5	1e-58	235.3	95.1	64.3
maker-scaffold10x_383_pilon-snap-gene-0.26-mRNA-1_transcript=maker-scaffold10x_383_pilon-snap-gene-0.26-mRNA-1_gene=maker-scaffold10x_383_pilon-snap-gene-0.26	A0A094ZLP7|A0A094ZLP7_SCHHA_Inositol_polyphosphate_1-phosphatase_OS=Schistosoma_haematobium_OX=6185_GN=MS3_03198_PE=4_SV=1	A0A094ZLP7	35.5	3.3e-32	148.3	75.1	65.7
maker-scaffold10x_826_pilon-augustus-gene-0.17-mRNA-1_transcript=maker-scaffold10x_826_pilon-augustus-gene-0.17-mRNA-1_gene=maker-scaffold10x_826_pilon-augustus-gene-0.17	A0A094ZMR5|A0A094ZMR5_SCHHA_Protein_TBATA_OS=Schistosoma_haematobium_OX=6185_GN=MS3_04248_PE=4_SV=1	A0A094ZMR5	31.8	3.4e-29	138.3	95.4	69
maker-scaffold10x_383_pilon-snap-gene-0.17-mRNA-1_transcript=maker-scaffold10x_383_pilon-snap-gene-0.17-mRNA-1_gene=maker-scaffold10x_383_pilon-snap-gene-0.17	A0A094ZN91|A0A094ZN91_SCHHA_MYCBP-associated_protein_OS=Schistosoma_haematobium_OX=6185_GN=MS3_03812_PE=4_SV=1	A0A094ZN91	27.7	1.7e-52	216.5	83	68.4
maker-scaffold10x_596_pilon-snap-gene-0.39-mRNA-1_transcript=maker-scaffold10x_596_pilon-snap-gene-0.39-mRNA-1_gene=maker-scaffold10x_596_pilon-snap-gene-0.39	A0A094ZQC8|A0A094ZQC8_SCHHA_Fibrocystin-L_(Fragment)_OS=Schistosoma_haematobium_OX=6185_GN=MS3_05263_PE=4_SV=1	A0A094ZQC8	44.5	0	2620.9	99.5	89.5
maker-scaffold10x_894_pilon-snap-gene-0.105-mRNA-1_transcript=maker-scaffold10x_894_pilon-snap-gene-0.105-mRNA-1_gene=maker-scaffold10x_894_pilon-snap-gene-0.105	A0A094ZRH3|A0A094ZRH3_SCHHA_Tetraspanin_OS=Schistosoma_haematobium_OX=6185_GN=MS3_03944_PE=3_SV=1	A0A094ZRH3	41.3	4.3e-23	117.5	61.9	60.1
maker-scaffold10x_247_pilon-snap-gene-0.72-mRNA-1_transcript=maker-scaffold10x_247_pilon-snap-gene-0.72-mRNA-1_gene=maker-scaffold10x_247_pilon-snap-gene-0.72	A0A094ZSJ1|A0A094ZSJ1_SCHHA_Protein_FAM221B_OS=Schistosoma_haematobium_OX=6185_GN=MS3_04354_PE=4_SV=1	A0A094ZSJ1	65.1	8.1e-104	386	96.4	95.4
maker-scaffold10x_217_pilon-snap-gene-0.64-mRNA-1_transcript=maker-scaffold10x_217_pilon-snap-gene-0.64-mRNA-1_gene=maker-scaffold10x_217_pilon-snap-gene-0.64	A0A094ZVU2|A0A094ZVU2_SCHHA_Chromatin_assembly_factor_1_subunit_B_OS=Schistosoma_haematobium_OX=6185_GN=MS3_07438_PE=4_SV=1	A0A094ZVU2	24.1	1.7e-07	67.4	33.7	22.1
maker-scaffold10x_419_pilon-augustus-gene-0.48-mRNA-1_transcript=maker-scaffold10x_419_pilon-augustus-gene-0.48-mRNA-1_gene=maker-scaffold10x_419_pilon-augustus-gene-0.48	A0A094ZWZ4|A0A094ZWZ4_SCHHA_UPF0565_protein_C2orf69_OS=Schistosoma_haematobium_OX=6185_GN=MS3_07833_PE=4_SV=1	A0A094ZWZ4	37.5	2.4e-54	221.9	87.4	97.1
maker-scaffold10x_2175_pilon-augustus-gene-0.0-mRNA-1_transcript=maker-scaffold10x_2175_pilon-augustus-gene-0.0-mRNA-1_gene=maker-scaffold10x_2175_pilon-augustus-gene-0.0	A0A094ZZB3|A0A094ZZB3_SCHHA_Serine/threonine-protein_phosphatase_OS=Schistosoma_haematobium_OX=6185_GN=MS3_08776_PE=3_SV=1	A0A094ZZB3	94.4	3.1e-119	436.8	100	73.3
maker-scaffold10x_917_pilon-snap-gene-0.33-mRNA-1_transcript=maker-scaffold10x_917_pilon-snap-gene-0.33-mRNA-1_gene=maker-scaffold10x_917_pilon-snap-gene-0.33	A0A095A134|A0A095A134_SCHHA_Leucine-rich_repeat-containing_protein_48_OS=Schistosoma_haematobium_OX=6185_GN=MS3_08979_PE=4_SV=1	A0A095A134	51.9	8.5e-88	333.6	98.4	73.1
maker-scaffold10x_717_pilon-snap-gene-0.20-mRNA-1_transcript=maker-scaffold10x_717_pilon-snap-gene-0.20-mRNA-1_gene=maker-scaffold10x_717_pilon-snap-gene-0.20	A0A095A1R0|A0A095A1R0_SCHHA_EF-hand_calcium-binding_domain-containing_protein_6_OS=Schistosoma_haematobium_OX=6185_GN=MS3_07838_PE=4_SV=1	A0A095A1R0	39.2	1.5e-28	135.6	82.1	18.3
maker-scaffold10x_717_pilon-snap-gene-0.21-mRNA-1_transcript=maker-scaffold10x_717_pilon-snap-gene-0.21-mRNA-1_gene=maker-scaffold10x_717_pilon-snap-gene-0.21	A0A095A1R0|A0A095A1R0_SCHHA_EF-hand_calcium-binding_domain-containing_protein_6_OS=Schistosoma_haematobium_OX=6185_GN=MS3_07838_PE=4_SV=1	A0A095A1R0	27	8.9e-28	134	93.7	45.1
maker-scaffold10x_75_pilon-snap-gene-0.106-mRNA-1_transcript=maker-scaffold10x_75_pilon-snap-gene-0.106-mRNA-1_gene=maker-scaffold10x_75_pilon-snap-gene-0.106	A0A095A222|A0A095A222_SCHHA_B-cell_CLL/lymphoma_7_protein_family_member_A_OS=Schistosoma_haematobium_OX=6185_GN=MS3_09352_PE=4_SV=1	A0A095A222	59.5	6e-25	123.6	50.4	50.5
maker-scaffold10x_908_pilon-augustus-gene-0.81-mRNA-1_transcript=maker-scaffold10x_908_pilon-augustus-gene-0.81-mRNA-1_gene=maker-scaffold10x_908_pilon-augustus-gene-0.81	A0A095A2M7|A0A095A2M7_SCHHA_Centrosomal_protein_of_112_kDa_OS=Schistosoma_haematobium_OX=6185_GN=MS3_08213_PE=4_SV=1	A0A095A2M7	54	8.3e-16	94.4	18.2	9.5
maker-scaffold10x_78_pilon-snap-gene-0.35-mRNA-1_transcript=maker-scaffold10x_78_pilon-snap-gene-0.35-mRNA-1_gene=maker-scaffold10x_78_pilon-snap-gene-0.35	A0A095A2N4|A0A095A2N4_SCHHA_Coiled-coil_domain-containing_protein_112_OS=Schistosoma_haematobium_OX=6185_GN=MS3_08219_PE=4_SV=1	A0A095A2N4	27.8	2.5e-41	179.5	89.1	96.7
maker-scaffold10x_1137_pilon-snap-gene-0.97-mRNA-1_transcript=maker-scaffold10x_1137_pilon-snap-gene-0.97-mRNA-1_gene=maker-scaffold10x_1137_pilon-snap-gene-0.97	A0A095A3Q3|A0A095A3Q3_SCHHA_Protein_LAP2_OS=Schistosoma_haematobium_OX=6185_GN=MS3_08665_PE=4_SV=1	A0A095A3Q3	44.6	5e-25	124.4	83.8	21.5
maker-scaffold10x_234_pilon-augustus-gene-0.63-mRNA-1_transcript=maker-scaffold10x_234_pilon-augustus-gene-0.63-mRNA-1_gene=maker-scaffold10x_234_pilon-augustus-gene-0.63	A0A095A4W8|A0A095A4W8_SCHHA_Ig-like_domain-containing_protein_OS=Schistosoma_haematobium_OX=6185_GN=MS3_09151_PE=4_SV=1	A0A095A4W8	25.9	4.5e-10	74.3	85.4	41.1
maker-scaffold10x_1427_pilon-snap-gene-0.5-mRNA-1_transcript=maker-scaffold10x_1427_pilon-snap-gene-0.5-mRNA-1_gene=maker-scaffold10x_1427_pilon-snap-gene-0.5	A0A095A5X7|A0A095A5X7_SCHHA_Protein_FAM183A_OS=Schistosoma_haematobium_OX=6185_GN=MS3_09557_PE=4_SV=1	A0A095A5X7	63.6	7.3e-35	155.6	91.2	91.5
maker-scaffold10x_1597_pilon-snap-gene-0.13-mRNA-1_transcript=maker-scaffold10x_1597_pilon-snap-gene-0.13-mRNA-1_gene=maker-scaffold10x_1597_pilon-snap-gene-0.13	A0A095AEM6|A0A095AEM6_SCHHA_E2F-associated_phosphoprotein_OS=Schistosoma_haematobium_OX=6185_GN=MS3_00392_PE=4_SV=1	A0A095AEM6	37.6	1.5e-29	139	90.1	100
maker-scaffold10x_1662_pilon-snap-gene-0.3-mRNA-1_transcript=maker-scaffold10x_1662_pilon-snap-gene-0.3-mRNA-1_gene=maker-scaffold10x_1662_pilon-snap-gene-0.3	A0A095AGF3|A0A095AGF3_SCHHA_Protein_FAM161B_OS=Schistosoma_haematobium_OX=6185_GN=MS3_01130_PE=4_SV=1	A0A095AGF3	39.8	4.2e-97	364.8	98.8	92.5
maker-scaffold10x_234_pilon-snap-gene-0.11-mRNA-1_transcript=maker-scaffold10x_234_pilon-snap-gene-0.11-mRNA-1_gene=maker-scaffold10x_234_pilon-snap-gene-0.11	A0A095AJC8|A0A095AJC8_SCHHA_X-ray_radiation_resistance-associated_protein_1_OS=Schistosoma_haematobium_OX=6185_GN=MS3_02358_PE=4_SV=1	A0A095AJC8	27.5	1.7e-73	287	97	99.9
maker-scaffold10x_749_pilon-snap-gene-0.125-mRNA-1_transcript=maker-scaffold10x_749_pilon-snap-gene-0.125-mRNA-1_gene=maker-scaffold10x_749_pilon-snap-gene-0.125	A0A095AKP3|A0A095AKP3_SCHHA_SLIT_and_NTRK-like_protein_2_OS=Schistosoma_haematobium_OX=6185_GN=MS3_02899_PE=4_SV=1	A0A095AKP3	36.5	1.1e-38	170.2	90.7	89.7
maker-scaffold10x_273_pilon-snap-gene-0.25-mRNA-1_transcript=maker-scaffold10x_273_pilon-snap-gene-0.25-mRNA-1_gene=maker-scaffold10x_273_pilon-snap-gene-0.25	A0A095B1Z2|A0A095B1Z2_SCHHA_Mitochondrial_assembly_of_ribosomal_large_subunit_protein_1_OS=Schistosoma_haematobium_OX=6185_GN=MS3_09647_PE=4_SV=1	A0A095B1Z2	41.4	5.4e-33	150.6	71.1	79.2
maker-scaffold10x_328_pilon-snap-gene-0.14-mRNA-1_transcript=maker-scaffold10x_328_pilon-snap-gene-0.14-mRNA-1_gene=maker-scaffold10x_328_pilon-snap-gene-0.14	A0A095BW98|A0A095BW98_SCHHA_Interleukin-1_receptor-associated_kinase_1-binding_protein_1-like_protein_OS=Schistosoma_haematobium_OX=6185_GN=MS3_01407_PE=4_SV=1	A0A095BW98	36.4	1.5e-24	122.1	100	98.7
maker-scaffold10x_327_pilon-snap-gene-0.33-mRNA-1_transcript=maker-scaffold10x_327_pilon-snap-gene-0.33-mRNA-1_gene=maker-scaffold10x_327_pilon-snap-gene-0.33	A0A095BZ75|A0A095BZ75_SCHHA_Tropinone_reductase_2_OS=Schistosoma_haematobium_OX=6185_GN=MS3_02709_PE=4_SV=1	A0A095BZ75	46.2	4.3e-91	344.4	100	87.2
maker-scaffold10x_167_pilon-augustus-gene-0.17-mRNA-1_transcript=maker-scaffold10x_167_pilon-augustus-gene-0.17-mRNA-1_gene=maker-scaffold10x_167_pilon-augustus-gene-0.17	A0A095C000|A0A095C000_SCHHA_Spermatogenesis-associated_protein_17_OS=Schistosoma_haematobium_OX=6185_GN=MS3_03020_PE=4_SV=1	A0A095C000	39.3	5.5e-34	153.7	96.5	94.4
maker-scaffold10x_318_pilon-snap-gene-0.96-mRNA-1_transcript=maker-scaffold10x_318_pilon-snap-gene-0.96-mRNA-1_gene=maker-scaffold10x_318_pilon-snap-gene-0.96	A0A095C450|A0A095C450_SCHHA_Thioredoxin_domain-containing_protein_OS=Schistosoma_haematobium_OX=6185_GN=MS3_04897_PE=4_SV=1	A0A095C450	52.1	1.1e-33	152.9	50.7	40.6
maker-scaffold10x_602_pilon-snap-gene-0.38-mRNA-1_transcript=maker-scaffold10x_602_pilon-snap-gene-0.38-mRNA-1_gene=maker-scaffold10x_602_pilon-snap-gene-0.38	A0A095CB34|A0A095CB34_SCHHA_Integrator_complex_subunit_1_OS=Schistosoma_haematobium_OX=6185_GN=MS3_08106_PE=4_SV=1	A0A095CB34	34.8	4.5e-80	308.1	98.6	27.7
maker-scaffold10x_1382_pilon-snap-gene-0.52-mRNA-1_transcript=maker-scaffold10x_1382_pilon-snap-gene-0.52-mRNA-1_gene=maker-scaffold10x_1382_pilon-snap-gene-0.52	A0A096ZM63|A0A096ZM63_FASHE_Cathepsin_B4_OS=Fasciola_hepatica_OX=6192_GN=CB4_PE=2_SV=1	A0A096ZM63	74.9	2.3e-130	474.6	75.7	97.3
maker-scaffold10x_677_pilon-snap-gene-0.16-mRNA-1_transcript=maker-scaffold10x_677_pilon-snap-gene-0.16-mRNA-1_gene=maker-scaffold10x_677_pilon-snap-gene-0.16	A0A097F1J3|A0A097F1J3_FASHE_CD59-like_protein_OS=Fasciola_hepatica_OX=6192_PE=2_SV=1	A0A097F1J3	93.5	2e-33	150.2	100	63.1
maker-scaffold10x_720_pilon-snap-gene-0.10-mRNA-1_transcript=maker-scaffold10x_720_pilon-snap-gene-0.10-mRNA-1_gene=maker-scaffold10x_720_pilon-snap-gene-0.10	A0A0L7QVD2|A0A0L7QVD2_9HYME_RCC1_and_BTB_domain-containing_protein_1_OS=Habropoda_laboriosa_OX=597456_GN=WH47_04179_PE=4_SV=1	A0A0L7QVD2	22.8	9.6e-06	62	24.4	22.7
augustus_masked-scaffold10x_1084_pilon-processed-gene-0.123-mRNA-1_transcript=augustus_masked-scaffold10x_1084_pilon-processed-gene-0.123-mRNA-1_gene=augustus_masked-scaffold10x_1084_pilon-processed-gene-0.123	A0A0R3SV28|A0A0R3SV28_HYMDI_Histone_H3_OS=Hymenolepis_diminuta_OX=6216_GN=HDID_LOCUS9396_PE=3_SV=1	A0A0R3SV28	100	6.2e-65	255.8	100	100
maker-scaffold10x_469_pilon-pred_gff_StringTie-gene-0.61-mRNA-1_transcript=maker-scaffold10x_469_pilon-pred_gff_StringTie-gene-0.61-mRNA-1_gene=maker-scaffold10x_469_pilon-pred_gff_StringTie-gene-0.61	A0A0R3SV28|A0A0R3SV28_HYMDI_Histone_H3_OS=Hymenolepis_diminuta_OX=6216_GN=HDID_LOCUS9396_PE=3_SV=1	A0A0R3SV28	100	6.2e-65	255.8	100	100
maker-scaffold10x_263_pilon-snap-gene-0.8-mRNA-1_transcript=maker-scaffold10x_263_pilon-snap-gene-0.8-mRNA-1_gene=maker-scaffold10x_263_pilon-snap-gene-0.8	A0A0R3TA08|A0A0R3TA08_RODNA_Endo/exonuclease/phosphatase_domain-containing_protein_OS=Rodentolepis_nana_OX=102285_GN=HNAJ_LOCUS3895_PE=4_SV=1	A0A0R3TA08	73	2.9e-06	60.5	35.2	10.1
maker-scaffold10x_440_pilon-snap-gene-0.14-mRNA-1_transcript=maker-scaffold10x_440_pilon-snap-gene-0.14-mRNA-1_gene=maker-scaffold10x_440_pilon-snap-gene-0.14	A0A0R3TA08|A0A0R3TA08_RODNA_Endo/exonuclease/phosphatase_domain-containing_protein_OS=Rodentolepis_nana_OX=102285_GN=HNAJ_LOCUS3895_PE=4_SV=1	A0A0R3TA08	84.4	1.9e-21	111.3	47.1	17.5
maker-scaffold10x_2450_pilon-snap-gene-0.0-mRNA-1_transcript=maker-scaffold10x_2450_pilon-snap-gene-0.0-mRNA-1_gene=maker-scaffold10x_2450_pilon-snap-gene-0.0	A0A0S4MHZ8|A0A0S4MHZ8_ECHMU_rRNA_promoter_binding_protein_OS=Echinococcus_multilocularis_OX=6211_PE=4_SV=1	A0A0S4MHZ8	50	2.5e-12	81.3	55.2	23.8
maker-scaffold10x_572_pilon-pred_gff_StringTie-gene-0.16-mRNA-1_transcript=maker-scaffold10x_572_pilon-pred_gff_StringTie-gene-0.16-mRNA-1_gene=maker-scaffold10x_572_pilon-pred_gff_StringTie-gene-0.16	A0A0S4MHZ8|A0A0S4MHZ8_ECHMU_rRNA_promoter_binding_protein_OS=Echinococcus_multilocularis_OX=6211_PE=4_SV=1	A0A0S4MHZ8	58.1	7.2e-28	132.5	98.4	32.1
maker-scaffold10x_284_pilon-snap-gene-0.104-mRNA-1_transcript=maker-scaffold10x_284_pilon-snap-gene-0.104-mRNA-1_gene=maker-scaffold10x_284_pilon-snap-gene-0.104	A0A0U1YYN9|A0A0U1YYN9_FASHE_Fatty_acid-binding_protein_type_IV_OS=Fasciola_hepatica_OX=6192_PE=2_SV=1	A0A0U1YYN9	100	1.9e-31	143.7	97.3	55.3
maker-scaffold10x_157_pilon-snap-gene-0.187-mRNA-1_transcript=maker-scaffold10x_157_pilon-snap-gene-0.187-mRNA-1_gene=maker-scaffold10x_157_pilon-snap-gene-0.187	A0A0U1Z1I6|A0A0U1Z1I6_FASHE_Fatty_acid-binding_protein_type_V_OS=Fasciola_hepatica_OX=6192_GN=D915_003146_PE=2_SV=1	A0A0U1Z1I6	100	1.3e-67	264.6	100	100
maker-scaffold10x_2403_pilon-snap-gene-0.19-mRNA-1_transcript=maker-scaffold10x_2403_pilon-snap-gene-0.19-mRNA-1_gene=maker-scaffold10x_2403_pilon-snap-gene-0.19	A0A0U1Z1W6|A0A0U1Z1W6_FASHE_Fatty_acid-binding_protein_type_VII_OS=Fasciola_hepatica_OX=6192_GN=D915_007688_PE=2_SV=1	A0A0U1Z1W6	100	9.1e-87	328.6	100	100
maker-scaffold10x_2045_pilon-snap-gene-0.14-mRNA-1_transcript=maker-scaffold10x_2045_pilon-snap-gene-0.14-mRNA-1_gene=maker-scaffold10x_2045_pilon-snap-gene-0.14	A0A0X3NWU3|A0A0X3NWU3_SCHSO_Reticulocyte-binding_protein_2_homolog_a_OS=Schistocephalus_solidus_OX=70667_GN=RBP2A_PE=4_SV=1	A0A0X3NWU3	25.6	7.4e-10	75.1	48.4	55.9
maker-scaffold10x_407_pilon-snap-gene-0.26-mRNA-1_transcript=maker-scaffold10x_407_pilon-snap-gene-0.26-mRNA-1_gene=maker-scaffold10x_407_pilon-snap-gene-0.26	A0A0X3NYC5|A0A0X3NYC5_SCHSO_Protein_DPCD_(Fragment)_OS=Schistocephalus_solidus_OX=70667_GN=DPCD_PE=4_SV=1	A0A0X3NYC5	54.5	1.3e-55	225.3	99.5	92.2
maker-scaffold10x_546_pilon-snap-gene-0.2-mRNA-1_transcript=maker-scaffold10x_546_pilon-snap-gene-0.2-mRNA-1_gene=maker-scaffold10x_546_pilon-snap-gene-0.2	A0A0X3P258|A0A0X3P258_SCHSO_Uncharacterized_conserved_protein_(DUF2346)_(Fragment)_OS=Schistocephalus_solidus_OX=70667_GN=TR117956_PE=4_SV=1	A0A0X3P258	36.1	8.7e-07	62	67	56
maker-scaffold10x_263_pilon-pred_gff_StringTie-gene-0.74-mRNA-1_transcript=maker-scaffold10x_263_pilon-pred_gff_StringTie-gene-0.74-mRNA-1_gene=maker-scaffold10x_263_pilon-pred_gff_StringTie-gene-0.74	A0A0X3PEA5|A0A0X3PEA5_SCHSO_PMP-22/EMP/MP20/Claudin_tight_junction_OS=Schistocephalus_solidus_OX=70667_GN=TR153413_PE=4_SV=1	A0A0X3PEA5	42.3	4.5e-39	170.6	91.5	69.5
maker-scaffold10x_1043_pilon-snap-gene-0.16-mRNA-1_transcript=maker-scaffold10x_1043_pilon-snap-gene-0.16-mRNA-1_gene=maker-scaffold10x_1043_pilon-snap-gene-0.16	A0A0X3PTN4|A0A0X3PTN4_SCHSO_C9orf171_homolog_OS=Schistocephalus_solidus_OX=70667_GN=CI171_PE=4_SV=1	A0A0X3PTN4	44.3	1.2e-56	229.2	91	94
maker-scaffold10x_917_pilon-snap-gene-0.47-mRNA-1_transcript=maker-scaffold10x_917_pilon-snap-gene-0.47-mRNA-1_gene=maker-scaffold10x_917_pilon-snap-gene-0.47	A0A0X3PYP9|A0A0X3PYP9_SCHSO_Protein_archease_OS=Schistocephalus_solidus_OX=70667_GN=ARCH_PE=4_SV=1	A0A0X3PYP9	78.4	2.2e-34	153.7	98.9	58.7
maker-scaffold10x_598_pilon-snap-gene-1.96-mRNA-1_transcript=maker-scaffold10x_598_pilon-snap-gene-1.96-mRNA-1_gene=maker-scaffold10x_598_pilon-snap-gene-1.96	A0A158Q5A8|A0A158Q5A8_DRAME_Metalloendopeptidase_OS=Dracunculus_medinensis_OX=318479_GN=DME_LOCUS9761_PE=4_SV=1	A0A158Q5A8	56.5	6.1e-07	63.2	32.6	5.2
maker-scaffold10x_654_pilon-augustus-gene-0.32-mRNA-1_transcript=maker-scaffold10x_654_pilon-augustus-gene-0.32-mRNA-1_gene=maker-scaffold10x_654_pilon-augustus-gene-0.32	A0A182ZZZ2|A0A182ZZZ2_9TREM_MPN_domain-containing_protein_OS=Echinostoma_caproni_OX=27848_GN=ECPE_LOCUS277_PE=4_SV=1	A0A182ZZZ2	92.3	4.3e-147	530	81.8	89.9
maker-scaffold10x_1459_pilon-snap-gene-0.34-mRNA-1_transcript=maker-scaffold10x_1459_pilon-snap-gene-0.34-mRNA-1_gene=maker-scaffold10x_1459_pilon-snap-gene-0.34	A0A183A014|A0A183A014_9TREM_KH_domain-containing_protein_OS=Echinostoma_caproni_OX=27848_GN=ECPE_LOCUS299_PE=4_SV=1	A0A183A014	87.3	1.4e-159	572	85	100
maker-scaffold10x_98_pilon-snap-gene-0.11-mRNA-1_transcript=maker-scaffold10x_98_pilon-snap-gene-0.11-mRNA-1_gene=maker-scaffold10x_98_pilon-snap-gene-0.11	A0A183A529|A0A183A529_9TREM_PAS_domain-containing_protein_OS=Echinostoma_caproni_OX=27848_GN=ECPE_LOCUS2064_PE=4_SV=1	A0A183A529	37.5	1.5e-15	93.2	42.3	21.1
maker-scaffold10x_794_pilon-pred_gff_StringTie-gene-0.16-mRNA-1_transcript=maker-scaffold10x_794_pilon-pred_gff_StringTie-gene-0.16-mRNA-1_gene=maker-scaffold10x_794_pilon-pred_gff_StringTie-gene-0.16	A0A183A5F6|A0A183A5F6_9TREM_G_PROTEIN_RECEP_F1_2_domain-containing_protein_OS=Echinostoma_caproni_OX=27848_GN=ECPE_LOCUS2191_PE=4_SV=1	A0A183A5F6	72.3	1.7e-133	485	86.1	87
maker-scaffold10x_544_pilon-augustus-gene-0.61-mRNA-1_transcript=maker-scaffold10x_544_pilon-augustus-gene-0.61-mRNA-1_gene=maker-scaffold10x_544_pilon-augustus-gene-0.61	A0A183A5W8|A0A183A5W8_9TREM_WW_domain-containing_protein_OS=Echinostoma_caproni_OX=27848_GN=ECPE_LOCUS2353_PE=4_SV=1	A0A183A5W8	41.6	1e-39	173.7	57.7	50.8
maker-scaffold10x_145_pilon-augustus-gene-2.262-mRNA-1_transcript=maker-scaffold10x_145_pilon-augustus-gene-2.262-mRNA-1_gene=maker-scaffold10x_145_pilon-augustus-gene-2.262	A0A183A608|A0A183A608_9TREM_C2_domain-containing_protein_OS=Echinostoma_caproni_OX=27848_GN=ECPE_LOCUS2393_PE=4_SV=1	A0A183A608	53.8	1.5e-124	455.7	87.8	59.9
maker-scaffold10x_1194_pilon-snap-gene-0.48-mRNA-1_transcript=maker-scaffold10x_1194_pilon-snap-gene-0.48-mRNA-1_gene=maker-scaffold10x_1194_pilon-snap-gene-0.48	A0A183A629|A0A183A629_9TREM_SprT-like_domain-containing_protein_OS=Echinostoma_caproni_OX=27848_GN=ECPE_LOCUS2414_PE=4_SV=1	A0A183A629	73.4	3.3e-81	310.5	94.9	83.3
maker-scaffold10x_331_pilon-augustus-gene-0.81-mRNA-1_transcript=maker-scaffold10x_331_pilon-augustus-gene-0.81-mRNA-1_gene=maker-scaffold10x_331_pilon-augustus-gene-0.81	A0A183A659|A0A183A659_9TREM_LIM_zinc-binding_domain-containing_protein_OS=Echinostoma_caproni_OX=27848_GN=ECPE_LOCUS2444_PE=4_SV=1	A0A183A659	53.3	1.6e-12	82	33.5	17.7
maker-scaffold10x_602_pilon-snap-gene-0.41-mRNA-1_transcript=maker-scaffold10x_602_pilon-snap-gene-0.41-mRNA-1_gene=maker-scaffold10x_602_pilon-snap-gene-0.41	A0A183A6J7|A0A183A6J7_9TREM_FAM184_domain-containing_protein_OS=Echinostoma_caproni_OX=27848_GN=ECPE_LOCUS2582_PE=4_SV=1	A0A183A6J7	37.3	9.9e-105	390.6	84.6	97.5
maker-scaffold10x_730_pilon-snap-gene-0.91-mRNA-1_transcript=maker-scaffold10x_730_pilon-snap-gene-0.91-mRNA-1_gene=maker-scaffold10x_730_pilon-snap-gene-0.91	A0A183A6R9|A0A183A6R9_9TREM_Hexosyltransferase_OS=Echinostoma_caproni_OX=27848_GN=ECPE_LOCUS2654_PE=3_SV=1	A0A183A6R9	51	5.6e-35	156.4	98.7	37.2
maker-scaffold10x_2386_pilon-snap-gene-0.24-mRNA-1_transcript=maker-scaffold10x_2386_pilon-snap-gene-0.24-mRNA-1_gene=maker-scaffold10x_2386_pilon-snap-gene-0.24	A0A183A6W1|A0A183A6W1_9TREM_G8_domain-containing_protein_OS=Echinostoma_caproni_OX=27848_GN=ECPE_LOCUS2696_PE=4_SV=1	A0A183A6W1	35.3	0	1092.4	52.9	82.7
maker-scaffold10x_908_pilon-augustus-gene-0.82-mRNA-1_transcript=maker-scaffold10x_908_pilon-augustus-gene-0.82-mRNA-1_gene=maker-scaffold10x_908_pilon-augustus-gene-0.82	A0A183A6X4|A0A183A6X4_9TREM_VWFD_domain-containing_protein_OS=Echinostoma_caproni_OX=27848_GN=ECPE_LOCUS2709_PE=4_SV=1	A0A183A6X4	64	1.1e-194	690.3	34.5	46.6
maker-scaffold10x_1705_pilon-snap-gene-0.5-mRNA-1_transcript=maker-scaffold10x_1705_pilon-snap-gene-0.5-mRNA-1_gene=maker-scaffold10x_1705_pilon-snap-gene-0.5	A0A183A6Z0|A0A183A6Z0_9TREM_SMI1_KNR4_domain-containing_protein_OS=Echinostoma_caproni_OX=27848_GN=ECPE_LOCUS2725_PE=4_SV=1	A0A183A6Z0	62	3e-90	340.9	86.3	100
maker-scaffold10x_383_pilon-snap-gene-1.18-mRNA-1_transcript=maker-scaffold10x_383_pilon-snap-gene-1.18-mRNA-1_gene=maker-scaffold10x_383_pilon-snap-gene-1.18	A0A183A7D4|A0A183A7D4_9TREM_Ig-like_domain-containing_protein_OS=Echinostoma_caproni_OX=27848_GN=ECPE_LOCUS2869_PE=4_SV=1	A0A183A7D4	51.7	0	1254.6	96.1	87.8
snap_masked-scaffold10x_2009_pilon-processed-gene-0.70-mRNA-1_transcript=snap_masked-scaffold10x_2009_pilon-processed-gene-0.70-mRNA-1_gene=snap_masked-scaffold10x_2009_pilon-processed-gene-0.70	A0A183A7G6|A0A183A7G6_9TREM_Innexin_OS=Echinostoma_caproni_OX=27848_GN=inx_PE=3_SV=1	A0A183A7G6	65.4	0	1209.1	97.1	99.8
maker-scaffold10x_92_pilon-snap-gene-0.25-mRNA-1_transcript=maker-scaffold10x_92_pilon-snap-gene-0.25-mRNA-1_gene=maker-scaffold10x_92_pilon-snap-gene-0.25	A0A183A838|A0A183A838_9TREM_PH_domain-containing_protein_OS=Echinostoma_caproni_OX=27848_GN=ECPE_LOCUS3123_PE=4_SV=1	A0A183A838	58.5	0	1170.2	98.4	93.9
maker-scaffold10x_949_pilon-snap-gene-0.4-mRNA-1_transcript=maker-scaffold10x_949_pilon-snap-gene-0.4-mRNA-1_gene=maker-scaffold10x_949_pilon-snap-gene-0.4	A0A183A846|A0A183A846_9TREM_C2H2-type_domain-containing_protein_OS=Echinostoma_caproni_OX=27848_GN=ECPE_LOCUS3131_PE=4_SV=1	A0A183A846	45.2	8.8e-126	459.9	89.2	11.6
maker-scaffold10x_549_pilon-snap-gene-0.16-mRNA-1_transcript=maker-scaffold10x_549_pilon-snap-gene-0.16-mRNA-1_gene=maker-scaffold10x_549_pilon-snap-gene-0.16	A0A183A8W1|A0A183A8W1_9TREM_BHLH_domain-containing_protein_OS=Echinostoma_caproni_OX=27848_GN=ECPE_LOCUS3396_PE=4_SV=1	A0A183A8W1	52.7	1.7e-30	141.7	75.8	87.9
maker-scaffold10x_237_pilon-snap-gene-0.50-mRNA-1_transcript=maker-scaffold10x_237_pilon-snap-gene-0.50-mRNA-1_gene=maker-scaffold10x_237_pilon-snap-gene-0.50	A0A183AAC3|A0A183AAC3_9TREM_EGF-like_domain-containing_protein_OS=Echinostoma_caproni_OX=27848_GN=ECPE_LOCUS3908_PE=4_SV=1	A0A183AAC3	46.5	1.7e-72	282.3	100	76.3
maker-scaffold10x_313_pilon-snap-gene-0.79-mRNA-1_transcript=maker-scaffold10x_313_pilon-snap-gene-0.79-mRNA-1_gene=maker-scaffold10x_313_pilon-snap-gene-0.79	A0A183AAT7|A0A183AAT7_9TREM_Tubulin_alpha_chain_OS=Echinostoma_caproni_OX=27848_GN=ECPE_LOCUS4072_PE=3_SV=1	A0A183AAT7	100	6.9e-262	911.8	100	100
maker-scaffold10x_102_pilon-augustus-gene-0.110-mRNA-1_transcript=maker-scaffold10x_102_pilon-augustus-gene-0.110-mRNA-1_gene=maker-scaffold10x_102_pilon-augustus-gene-0.110	A0A183ABI0|A0A183ABI0_9TREM_VPS9_domain-containing_protein_OS=Echinostoma_caproni_OX=27848_GN=ECPE_LOCUS4315_PE=4_SV=1	A0A183ABI0	75.1	2.1e-140	508.1	82.3	21.4
maker-scaffold10x_520_pilon-augustus-gene-1.56-mRNA-1_transcript=maker-scaffold10x_520_pilon-augustus-gene-1.56-mRNA-1_gene=maker-scaffold10x_520_pilon-augustus-gene-1.56	A0A183AC44|A0A183AC44_9TREM_SH3_10_domain-containing_protein_OS=Echinostoma_caproni_OX=27848_GN=ECPE_LOCUS4529_PE=4_SV=1	A0A183AC44	45	1.3e-164	589.7	92	30
maker-scaffold10x_432_pilon-snap-gene-0.114-mRNA-1_transcript=maker-scaffold10x_432_pilon-snap-gene-0.114-mRNA-1_gene=maker-scaffold10x_432_pilon-snap-gene-0.114	A0A183AC53|A0A183AC53_9TREM_2-Hacid_dh_C_domain-containing_protein_OS=Echinostoma_caproni_OX=27848_GN=ECPE_LOCUS4538_PE=4_SV=1	A0A183AC53	49.4	2.6e-143	518.1	99.6	98.9
maker-scaffold10x_1335_pilon-augustus-gene-0.50-mRNA-1_transcript=maker-scaffold10x_1335_pilon-augustus-gene-0.50-mRNA-1_gene=maker-scaffold10x_1335_pilon-augustus-gene-0.50	A0A183AC91|A0A183AC91_9TREM_WD_REPEATS_REGION_domain-containing_protein_OS=Echinostoma_caproni_OX=27848_GN=ECPE_LOCUS4576_PE=4_SV=1	A0A183AC91	79.2	5.6e-160	573.2	82	95.3
maker-scaffold10x_2220_pilon-augustus-gene-0.5-mRNA-1_transcript=maker-scaffold10x_2220_pilon-augustus-gene-0.5-mRNA-1_gene=maker-scaffold10x_2220_pilon-augustus-gene-0.5	A0A183ACW8|A0A183ACW8_9TREM_Protein_kinase_domain-containing_protein_OS=Echinostoma_caproni_OX=27848_GN=ECPE_LOCUS4803_PE=4_SV=1	A0A183ACW8	88.4	1e-11	77.8	71.7	27.9
maker-scaffold10x_13_pilon-snap-gene-0.81-mRNA-1_transcript=maker-scaffold10x_13_pilon-snap-gene-0.81-mRNA-1_gene=maker-scaffold10x_13_pilon-snap-gene-0.81	A0A183ACZ4|A0A183ACZ4_9TREM_MIEAP_domain-containing_protein_OS=Echinostoma_caproni_OX=27848_GN=ECPE_LOCUS4829_PE=4_SV=1	A0A183ACZ4	65.7	8.1e-125	456.4	78.3	92.6
maker-scaffold10x_103_pilon-snap-gene-0.103-mRNA-1_transcript=maker-scaffold10x_103_pilon-snap-gene-0.103-mRNA-1_gene=maker-scaffold10x_103_pilon-snap-gene-0.103	A0A183ADT6|A0A183ADT6_9TREM_Integrase_catalytic_domain-containing_protein_OS=Echinostoma_caproni_OX=27848_GN=ECPE_LOCUS5121_PE=4_SV=1	A0A183ADT6	52.8	1.2e-250	875.5	99.8	80.7
maker-scaffold10x_34_pilon-snap-gene-0.18-mRNA-1_transcript=maker-scaffold10x_34_pilon-snap-gene-0.18-mRNA-1_gene=maker-scaffold10x_34_pilon-snap-gene-0.18	A0A183ADY8|A0A183ADY8_9TREM_S-adenosylmethionine_synthase_OS=Echinostoma_caproni_OX=27848_GN=ECPE_LOCUS5173_PE=3_SV=1	A0A183ADY8	48.4	6.1e-69	270.4	88.9	87.5
maker-scaffold10x_145_pilon-snap-gene-1.3-mRNA-1_transcript=maker-scaffold10x_145_pilon-snap-gene-1.3-mRNA-1_gene=maker-scaffold10x_145_pilon-snap-gene-1.3	A0A183AE10|A0A183AE10_9TREM_C2_domain-containing_protein_OS=Echinostoma_caproni_OX=27848_PE=4_SV=1	A0A183AE10	45.8	2.7e-156	562	59.3	100
maker-scaffold10x_14_pilon-snap-gene-0.126-mRNA-1_transcript=maker-scaffold10x_14_pilon-snap-gene-0.126-mRNA-1_gene=maker-scaffold10x_14_pilon-snap-gene-0.126	A0A183AEE9|A0A183AEE9_9TREM_Cytochrome_c_domain-containing_protein_OS=Echinostoma_caproni_OX=27848_GN=ECPE_LOCUS5334_PE=4_SV=1	A0A183AEE9	73.9	1e-136	495.4	92.4	100
maker-scaffold10x_113_pilon-pred_gff_StringTie-gene-0.150-mRNA-1_transcript=maker-scaffold10x_113_pilon-pred_gff_StringTie-gene-0.150-mRNA-1_gene=maker-scaffold10x_113_pilon-pred_gff_StringTie-gene-0.150	A0A183AEN9|A0A183AEN9_9TREM_UBIQUITIN_CONJUGAT_2_domain-containing_protein_OS=Echinostoma_caproni_OX=27848_GN=ECPE_LOCUS5424_PE=3_SV=1	A0A183AEN9	100	6.7e-84	318.9	100	100
maker-scaffold10x_441_pilon-augustus-gene-0.16-mRNA-1_transcript=maker-scaffold10x_441_pilon-augustus-gene-0.16-mRNA-1_gene=maker-scaffold10x_441_pilon-augustus-gene-0.16	A0A183AEY5|A0A183AEY5_9TREM_Ras-GEF_domain-containing_protein_OS=Echinostoma_caproni_OX=27848_GN=ECPE_LOCUS5521_PE=4_SV=1	A0A183AEY5	56.3	1.1e-43	186	70.3	54.8
maker-scaffold10x_1008_pilon-snap-gene-0.3-mRNA-1_transcript=maker-scaffold10x_1008_pilon-snap-gene-0.3-mRNA-1_gene=maker-scaffold10x_1008_pilon-snap-gene-0.3	A0A183AFF4|A0A183AFF4_9TREM_PH_domain-containing_protein_OS=Echinostoma_caproni_OX=27848_GN=ECPE_LOCUS5689_PE=4_SV=1	A0A183AFF4	56.9	3.8e-22	113.2	95.2	10.3
maker-scaffold10x_1710_pilon-augustus-gene-0.10-mRNA-1_transcript=maker-scaffold10x_1710_pilon-augustus-gene-0.10-mRNA-1_gene=maker-scaffold10x_1710_pilon-augustus-gene-0.10	A0A183AFF4|A0A183AFF4_9TREM_PH_domain-containing_protein_OS=Echinostoma_caproni_OX=27848_GN=ECPE_LOCUS5689_PE=4_SV=1	A0A183AFF4	57	3.5e-134	487.6	96.6	48.9
maker-scaffold10x_1710_pilon-snap-gene-0.1-mRNA-1_transcript=maker-scaffold10x_1710_pilon-snap-gene-0.1-mRNA-1_gene=maker-scaffold10x_1710_pilon-snap-gene-0.1	A0A183AFF4|A0A183AFF4_9TREM_PH_domain-containing_protein_OS=Echinostoma_caproni_OX=27848_GN=ECPE_LOCUS5689_PE=4_SV=1	A0A183AFF4	51.9	1.8e-61	245.4	98.6	28.8
maker-scaffold10x_1733_pilon-snap-gene-0.2-mRNA-1_transcript=maker-scaffold10x_1733_pilon-snap-gene-0.2-mRNA-1_gene=maker-scaffold10x_1733_pilon-snap-gene-0.2	A0A183AFF4|A0A183AFF4_9TREM_PH_domain-containing_protein_OS=Echinostoma_caproni_OX=27848_GN=ECPE_LOCUS5689_PE=4_SV=1	A0A183AFF4	52.2	4.8e-79	303.9	99.4	33.5
maker-scaffold10x_2581_pilon-snap-gene-0.2-mRNA-1_transcript=maker-scaffold10x_2581_pilon-snap-gene-0.2-mRNA-1_gene=maker-scaffold10x_2581_pilon-snap-gene-0.2	A0A183AFF4|A0A183AFF4_9TREM_PH_domain-containing_protein_OS=Echinostoma_caproni_OX=27848_GN=ECPE_LOCUS5689_PE=4_SV=1	A0A183AFF4	81.5	1.7e-75	291.2	98.9	17.4
snap_masked-scaffold10x_2334_pilon-processed-gene-0.1-mRNA-1_transcript=snap_masked-scaffold10x_2334_pilon-processed-gene-0.1-mRNA-1_gene=snap_masked-scaffold10x_2334_pilon-processed-gene-0.1	A0A183AFF4|A0A183AFF4_9TREM_PH_domain-containing_protein_OS=Echinostoma_caproni_OX=27848_GN=ECPE_LOCUS5689_PE=4_SV=1	A0A183AFF4	44.2	2.6e-81	312	95	39.5
snap_masked-scaffold10x_2402_pilon-processed-gene-0.0-mRNA-1_transcript=snap_masked-scaffold10x_2402_pilon-processed-gene-0.0-mRNA-1_gene=snap_masked-scaffold10x_2402_pilon-processed-gene-0.0	A0A183AFF4|A0A183AFF4_9TREM_PH_domain-containing_protein_OS=Echinostoma_caproni_OX=27848_GN=ECPE_LOCUS5689_PE=4_SV=1	A0A183AFF4	73	1.4e-53	218.4	83.1	14.8
maker-scaffold10x_1318_pilon-augustus-gene-0.19-mRNA-1_transcript=maker-scaffold10x_1318_pilon-augustus-gene-0.19-mRNA-1_gene=maker-scaffold10x_1318_pilon-augustus-gene-0.19	A0A183AFN3|A0A183AFN3_9TREM_Fumerase_C_domain-containing_protein_OS=Echinostoma_caproni_OX=27848_PE=4_SV=1	A0A183AFN3	49	4.4e-89	337.8	73.5	38.1
maker-scaffold10x_1318_pilon-snap-gene-0.7-mRNA-1_transcript=maker-scaffold10x_1318_pilon-snap-gene-0.7-mRNA-1_gene=maker-scaffold10x_1318_pilon-snap-gene-0.7	A0A183AFN3|A0A183AFN3_9TREM_Fumerase_C_domain-containing_protein_OS=Echinostoma_caproni_OX=27848_PE=4_SV=1	A0A183AFN3	55.9	4.9e-127	465.7	25.6	49.6
maker-scaffold10x_238_pilon-snap-gene-0.103-mRNA-1_transcript=maker-scaffold10x_238_pilon-snap-gene-0.103-mRNA-1_gene=maker-scaffold10x_238_pilon-snap-gene-0.103	A0A183AFY7|A0A183AFY7_9TREM_ZU5_domain-containing_protein_OS=Echinostoma_caproni_OX=27848_GN=ECPE_LOCUS5872_PE=4_SV=1	A0A183AFY7	59.7	6.1e-206	727.2	54.7	92
maker-scaffold10x_691_pilon-snap-gene-0.43-mRNA-1_transcript=maker-scaffold10x_691_pilon-snap-gene-0.43-mRNA-1_gene=maker-scaffold10x_691_pilon-snap-gene-0.43	A0A183AFZ3|A0A183AFZ3_9TREM_C2_domain-containing_protein_OS=Echinostoma_caproni_OX=27848_GN=ECPE_LOCUS5878_PE=4_SV=1	A0A183AFZ3	62.3	9.5e-57	229.6	59.7	76.3
augustus_masked-scaffold10x_113_pilon-processed-gene-0.222-mRNA-1_transcript=augustus_masked-scaffold10x_113_pilon-processed-gene-0.222-mRNA-1_gene=augustus_masked-scaffold10x_113_pilon-processed-gene-0.222	A0A183AG94|A0A183AG94_9TREM_DNA_polymerase_OS=Echinostoma_caproni_OX=27848_PE=3_SV=1	A0A183AG94	69.4	1e-268	934.9	93.1	69.3
augustus_masked-scaffold10x_355_pilon-processed-gene-0.44-mRNA-1_transcript=augustus_masked-scaffold10x_355_pilon-processed-gene-0.44-mRNA-1_gene=augustus_masked-scaffold10x_355_pilon-processed-gene-0.44	A0A183AH23|A0A183AH23_9TREM_Elongation_factor_1-alpha_OS=Echinostoma_caproni_OX=27848_GN=ECPE_LOCUS6258_PE=3_SV=1	A0A183AH23	90.8	1.9e-243	850.5	99.1	99.1
augustus_masked-scaffold10x_474_pilon-processed-gene-0.52-mRNA-1_transcript=augustus_masked-scaffold10x_474_pilon-processed-gene-0.52-mRNA-1_gene=augustus_masked-scaffold10x_474_pilon-processed-gene-0.52	A0A183AHE6|A0A183AHE6_9TREM_Tubulin_alpha_chain_OS=Echinostoma_caproni_OX=27848_GN=ECPE_LOCUS6381_PE=3_SV=1	A0A183AHE6	94.9	3.1e-193	683.3	100	80.1
maker-scaffold10x_92_pilon-snap-gene-0.38-mRNA-1_transcript=maker-scaffold10x_92_pilon-snap-gene-0.38-mRNA-1_gene=maker-scaffold10x_92_pilon-snap-gene-0.38	A0A183AIA2|A0A183AIA2_9TREM_E3_ubiquitin-protein_ligase_OS=Echinostoma_caproni_OX=27848_GN=ECPE_LOCUS6687_PE=3_SV=1	A0A183AIA2	95.6	1.7e-114	421	97.6	56.4
maker-scaffold10x_1309_pilon-snap-gene-0.100-mRNA-1_transcript=maker-scaffold10x_1309_pilon-snap-gene-0.100-mRNA-1_gene=maker-scaffold10x_1309_pilon-snap-gene-0.100	A0A183AIH1|A0A183AIH1_9TREM_SCP_domain-containing_protein_OS=Echinostoma_caproni_OX=27848_GN=ECPE_LOCUS6756_PE=3_SV=1	A0A183AIH1	76.7	5.6e-48	199.1	99.1	67.1
maker-scaffold10x_295_pilon-snap-gene-0.75-mRNA-1_transcript=maker-scaffold10x_295_pilon-snap-gene-0.75-mRNA-1_gene=maker-scaffold10x_295_pilon-snap-gene-0.75	A0A183AIZ3|A0A183AIZ3_9TREM_CUB_domain-containing_protein_OS=Echinostoma_caproni_OX=27848_GN=ECPE_LOCUS6928_PE=4_SV=1	A0A183AIZ3	46.2	2.1e-19	108.6	5.5	27.9
maker-scaffold10x_413_pilon-augustus-gene-0.6-mRNA-1_transcript=maker-scaffold10x_413_pilon-augustus-gene-0.6-mRNA-1_gene=maker-scaffold10x_413_pilon-augustus-gene-0.6	A0A183AJ69|A0A183AJ69_9TREM_SAM_domain-containing_protein_OS=Echinostoma_caproni_OX=27848_PE=4_SV=1	A0A183AJ69	58.3	7.3e-58	233.4	70.4	17.7
maker-scaffold10x_637_pilon-augustus-gene-0.42-mRNA-1_transcript=maker-scaffold10x_637_pilon-augustus-gene-0.42-mRNA-1_gene=maker-scaffold10x_637_pilon-augustus-gene-0.42	A0A183AJC7|A0A183AJC7_9TREM_PLAT_domain-containing_protein_OS=Echinostoma_caproni_OX=27848_GN=ECPE_LOCUS7062_PE=4_SV=1	A0A183AJC7	38.5	2.7e-197	698.7	96.5	96.4
maker-scaffold10x_436_pilon-snap-gene-0.29-mRNA-1_transcript=maker-scaffold10x_436_pilon-snap-gene-0.29-mRNA-1_gene=maker-scaffold10x_436_pilon-snap-gene-0.29	A0A183AJD1|A0A183AJD1_9TREM_RRM_domain-containing_protein_OS=Echinostoma_caproni_OX=27848_GN=ECPE_LOCUS7067_PE=4_SV=1	A0A183AJD1	79	0	1443.3	100	100
maker-scaffold10x_862_pilon-augustus-gene-0.34-mRNA-1_transcript=maker-scaffold10x_862_pilon-augustus-gene-0.34-mRNA-1_gene=maker-scaffold10x_862_pilon-augustus-gene-0.34	A0A183AKF4|A0A183AKF4_9TREM_alpha-1,2-Mannosidase_OS=Echinostoma_caproni_OX=27848_GN=ECPE_LOCUS7439_PE=3_SV=1	A0A183AKF4	67.9	2.9e-245	857.1	96.6	92.1
maker-scaffold10x_284_pilon-snap-gene-0.121-mRNA-1_transcript=maker-scaffold10x_284_pilon-snap-gene-0.121-mRNA-1_gene=maker-scaffold10x_284_pilon-snap-gene-0.121	A0A183AKV6|A0A183AKV6_9TREM_Peptidase_M3_domain-containing_protein_OS=Echinostoma_caproni_OX=27848_GN=ECPE_LOCUS7591_PE=3_SV=1	A0A183AKV6	57.7	2.7e-256	894	99.9	99.9
maker-scaffold10x_1010_pilon-augustus-gene-0.28-mRNA-1_transcript=maker-scaffold10x_1010_pilon-augustus-gene-0.28-mRNA-1_gene=maker-scaffold10x_1010_pilon-augustus-gene-0.28	A0A183AL47|A0A183AL47_9TREM_ABC1_domain-containing_protein_OS=Echinostoma_caproni_OX=27848_GN=ECPE_LOCUS7682_PE=4_SV=1	A0A183AL47	41.1	2.4e-17	98.6	57.7	23.2
maker-scaffold10x_504_pilon-snap-gene-0.5-mRNA-1_transcript=maker-scaffold10x_504_pilon-snap-gene-0.5-mRNA-1_gene=maker-scaffold10x_504_pilon-snap-gene-0.5	A0A183ALH2|A0A183ALH2_9TREM_Protein_kinase_domain-containing_protein_OS=Echinostoma_caproni_OX=27848_PE=4_SV=1	A0A183ALH2	43.2	3.7e-157	565.1	72.7	91.7
maker-scaffold10x_313_pilon-snap-gene-0.73-mRNA-1_transcript=maker-scaffold10x_313_pilon-snap-gene-0.73-mRNA-1_gene=maker-scaffold10x_313_pilon-snap-gene-0.73	A0A183ALM2|A0A183ALM2_9TREM_PKS_AT_domain-containing_protein_OS=Echinostoma_caproni_OX=27848_GN=ECPE_LOCUS7857_PE=4_SV=1	A0A183ALM2	65.3	1.4e-122	448.7	90.5	100
maker-scaffold10x_1450_pilon-snap-gene-0.11-mRNA-1_transcript=maker-scaffold10x_1450_pilon-snap-gene-0.11-mRNA-1_gene=maker-scaffold10x_1450_pilon-snap-gene-0.11	A0A183AMJ5|A0A183AMJ5_9TREM_C3H1-type_domain-containing_protein_OS=Echinostoma_caproni_OX=27848_GN=ECPE_LOCUS8180_PE=4_SV=1	A0A183AMJ5	56	9.3e-168	599.4	89	96
augustus_masked-scaffold10x_172_pilon-processed-gene-0.83-mRNA-1_transcript=augustus_masked-scaffold10x_172_pilon-processed-gene-0.83-mRNA-1_gene=augustus_masked-scaffold10x_172_pilon-processed-gene-0.83	A0A183ANB9|A0A183ANB9_9TREM_BZIP_domain-containing_protein_OS=Echinostoma_caproni_OX=27848_GN=ECPE_LOCUS8454_PE=4_SV=1	A0A183ANB9	51.5	1.3e-173	619.4	77.1	74.3
maker-scaffold10x_2594_pilon-augustus-gene-0.1-mRNA-1_transcript=maker-scaffold10x_2594_pilon-augustus-gene-0.1-mRNA-1_gene=maker-scaffold10x_2594_pilon-augustus-gene-0.1	A0A183ANF4|A0A183ANF4_9TREM_DUF3456_domain-containing_protein_OS=Echinostoma_caproni_OX=27848_GN=ECPE_LOCUS8489_PE=4_SV=1	A0A183ANF4	62	5e-18	99.8	58.7	38.6
maker-scaffold10x_357_pilon-snap-gene-0.6-mRNA-1_transcript=maker-scaffold10x_357_pilon-snap-gene-0.6-mRNA-1_gene=maker-scaffold10x_357_pilon-snap-gene-0.6	A0A183ANG9|A0A183ANG9_9TREM_BSD_domain-containing_protein_OS=Echinostoma_caproni_OX=27848_GN=ECPE_LOCUS8504_PE=4_SV=1	A0A183ANG9	57.5	1.9e-131	478.8	84.4	96.9
maker-scaffold10x_125_pilon-augustus-gene-0.80-mRNA-1_transcript=maker-scaffold10x_125_pilon-augustus-gene-0.80-mRNA-1_gene=maker-scaffold10x_125_pilon-augustus-gene-0.80	A0A183ANM7|A0A183ANM7_9TREM_N2227_domain-containing_protein_OS=Echinostoma_caproni_OX=27848_GN=ECPE_LOCUS8562_PE=4_SV=1	A0A183ANM7	62.3	1.5e-102	381.7	88.5	90.8
maker-scaffold10x_907_pilon-augustus-gene-0.19-mRNA-1_transcript=maker-scaffold10x_907_pilon-augustus-gene-0.19-mRNA-1_gene=maker-scaffold10x_907_pilon-augustus-gene-0.19	A0A183AP95|A0A183AP95_9TREM_CRAL-TRIO_domain-containing_protein_OS=Echinostoma_caproni_OX=27848_GN=ECPE_LOCUS8780_PE=4_SV=1	A0A183AP95	62.7	6.2e-75	289.7	99.5	57.8
maker-scaffold10x_357_pilon-augustus-gene-0.44-mRNA-1_transcript=maker-scaffold10x_357_pilon-augustus-gene-0.44-mRNA-1_gene=maker-scaffold10x_357_pilon-augustus-gene-0.44	A0A183AQD4|A0A183AQD4_9TREM_C2H2-type_domain-containing_protein_OS=Echinostoma_caproni_OX=27848_GN=ECPE_LOCUS9169_PE=4_SV=1	A0A183AQD4	70	8.3e-198	699.1	98.9	99.2
maker-scaffold10x_730_pilon-snap-gene-0.87-mRNA-1_transcript=maker-scaffold10x_730_pilon-snap-gene-0.87-mRNA-1_gene=maker-scaffold10x_730_pilon-snap-gene-0.87	A0A183AQW8|A0A183AQW8_9TREM_ARID_domain-containing_protein_OS=Echinostoma_caproni_OX=27848_GN=ECPE_LOCUS9353_PE=4_SV=1	A0A183AQW8	62.3	0	1208.7	64.8	98.7
maker-scaffold10x_2220_pilon-snap-gene-0.34-mRNA-1_transcript=maker-scaffold10x_2220_pilon-snap-gene-0.34-mRNA-1_gene=maker-scaffold10x_2220_pilon-snap-gene-0.34	A0A183AQX6|A0A183AQX6_9TREM_Phosphomannomutase_OS=Echinostoma_caproni_OX=27848_GN=ECPE_LOCUS9361_PE=3_SV=1	A0A183AQX6	89.3	2.1e-127	464.2	98.4	99.2
maker-scaffold10x_718_pilon-snap-gene-0.9-mRNA-1_transcript=maker-scaffold10x_718_pilon-snap-gene-0.9-mRNA-1_gene=maker-scaffold10x_718_pilon-snap-gene-0.9	A0A183ASF4|A0A183ASF4_9TREM_Proteasome_subunit_alpha_type_OS=Echinostoma_caproni_OX=27848_GN=ECPE_LOCUS9889_PE=3_SV=1	A0A183ASF4	81.3	4.4e-119	436.4	100	100
augustus_masked-scaffold10x_802_pilon-processed-gene-0.53-mRNA-1_transcript=augustus_masked-scaffold10x_802_pilon-processed-gene-0.53-mRNA-1_gene=augustus_masked-scaffold10x_802_pilon-processed-gene-0.53	A0A183ASQ4|A0A183ASQ4_9TREM_LID_domain-containing_protein_OS=Echinostoma_caproni_OX=27848_PE=4_SV=1	A0A183ASQ4	88.9	9.5e-205	722.2	78.8	99.8
maker-scaffold10x_457_pilon-snap-gene-0.59-mRNA-1_transcript=maker-scaffold10x_457_pilon-snap-gene-0.59-mRNA-1_gene=maker-scaffold10x_457_pilon-snap-gene-0.59	A0A183AT24|A0A183AT24_9TREM_C2H2-type_domain-containing_protein_OS=Echinostoma_caproni_OX=27848_GN=ECPE_LOCUS10109_PE=4_SV=1	A0A183AT24	49.5	0	1112.8	81.4	98
maker-scaffold10x_1791_pilon-snap-gene-0.43-mRNA-1_transcript=maker-scaffold10x_1791_pilon-snap-gene-0.43-mRNA-1_gene=maker-scaffold10x_1791_pilon-snap-gene-0.43	A0A183AT39|A0A183AT39_9TREM_UPF0020_domain-containing_protein_OS=Echinostoma_caproni_OX=27848_GN=ECPE_LOCUS10124_PE=4_SV=1	A0A183AT39	57.3	2.9e-72	282	53.4	69.3
maker-scaffold10x_749_pilon-augustus-gene-0.1-mRNA-1_transcript=maker-scaffold10x_749_pilon-augustus-gene-0.1-mRNA-1_gene=maker-scaffold10x_749_pilon-augustus-gene-0.1	A0A183AT52|A0A183AT52_9TREM_TOG_domain-containing_protein_OS=Echinostoma_caproni_OX=27848_GN=ECPE_LOCUS10137_PE=4_SV=1	A0A183AT52	57.3	1.3e-81	312.4	93.5	50.2
maker-scaffold10x_703_pilon-snap-gene-0.97-mRNA-1_transcript=maker-scaffold10x_703_pilon-snap-gene-0.97-mRNA-1_gene=maker-scaffold10x_703_pilon-snap-gene-0.97	A0A183AUA7|A0A183AUA7_9TREM_Cytochrome_b5_heme-binding_domain-containing_protein_OS=Echinostoma_caproni_OX=27848_GN=ECPE_LOCUS10542_PE=3_SV=1	A0A183AUA7	83.7	1.9e-105	391	100	100
maker-scaffold10x_923_pilon-snap-gene-0.8-mRNA-1_transcript=maker-scaffold10x_923_pilon-snap-gene-0.8-mRNA-1_gene=maker-scaffold10x_923_pilon-snap-gene-0.8	A0A183AUF0|A0A183AUF0_9TREM_WW_domain-containing_protein_OS=Echinostoma_caproni_OX=27848_GN=ECPE_LOCUS10585_PE=4_SV=1	A0A183AUF0	83.3	4.9e-59	236.1	100	38.2
snap_masked-scaffold10x_2013_pilon-processed-gene-0.5-mRNA-1_transcript=snap_masked-scaffold10x_2013_pilon-processed-gene-0.5-mRNA-1_gene=snap_masked-scaffold10x_2013_pilon-processed-gene-0.5	A0A183AV83|A0A183AV83_9TREM_SET_domain-containing_protein_OS=Echinostoma_caproni_OX=27848_GN=ECPE_LOCUS10868_PE=4_SV=1	A0A183AV83	48	5.5e-26	129.8	9.8	30.8
maker-scaffold10x_1189_pilon-snap-gene-0.90-mRNA-1_transcript=maker-scaffold10x_1189_pilon-snap-gene-0.90-mRNA-1_gene=maker-scaffold10x_1189_pilon-snap-gene-0.90	A0A183AWH2|A0A183AWH2_9TREM_KH_domain-containing_protein_OS=Echinostoma_caproni_OX=27848_GN=ECPE_LOCUS11307_PE=4_SV=1	A0A183AWH2	55.8	8.1e-214	754.2	39.1	95.3
maker-scaffold10x_598_pilon-augustus-gene-0.8-mRNA-1_transcript=maker-scaffold10x_598_pilon-augustus-gene-0.8-mRNA-1_gene=maker-scaffold10x_598_pilon-augustus-gene-0.8	A0A183AWM2|A0A183AWM2_9TREM_Lig_chan-Glu_bd_domain-containing_protein_OS=Echinostoma_caproni_OX=27848_GN=ECPE_LOCUS11357_PE=4_SV=1	A0A183AWM2	64	5e-68	266.5	99	33.5
maker-scaffold10x_466_pilon-snap-gene-0.92-mRNA-1_transcript=maker-scaffold10x_466_pilon-snap-gene-0.92-mRNA-1_gene=maker-scaffold10x_466_pilon-snap-gene-0.92	A0A183AWS7|A0A183AWS7_9TREM_C2H2-type_domain-containing_protein_OS=Echinostoma_caproni_OX=27848_GN=ECPE_LOCUS11412_PE=4_SV=1	A0A183AWS7	38	8.5e-36	160.6	69.3	84.7
maker-scaffold10x_1377_pilon-pred_gff_StringTie-gene-0.17-mRNA-1_transcript=maker-scaffold10x_1377_pilon-pred_gff_StringTie-gene-0.17-mRNA-1_gene=maker-scaffold10x_1377_pilon-pred_gff_StringTie-gene-0.17	A0A183AXA4|A0A183AXA4_9TREM_Receptor_protein_serine/threonine_kinase_OS=Echinostoma_caproni_OX=27848_GN=ECPE_LOCUS11589_PE=3_SV=1	A0A183AXA4	63	7.1e-27	129.4	74	14.9
maker-scaffold10x_410_pilon-snap-gene-0.4-mRNA-1_transcript=maker-scaffold10x_410_pilon-snap-gene-0.4-mRNA-1_gene=maker-scaffold10x_410_pilon-snap-gene-0.4	A0A183AXQ8|A0A183AXQ8_9TREM_SAC_domain-containing_protein_OS=Echinostoma_caproni_OX=27848_GN=ECPE_LOCUS11743_PE=4_SV=1	A0A183AXQ8	48.4	7.3e-35	156.4	89.7	40.1
maker-scaffold10x_1084_pilon-snap-gene-0.146-mRNA-1_transcript=maker-scaffold10x_1084_pilon-snap-gene-0.146-mRNA-1_gene=maker-scaffold10x_1084_pilon-snap-gene-0.146	A0A183AY58|A0A183AY58_9TREM_Protein_YIPF_OS=Echinostoma_caproni_OX=27848_GN=ECPE_LOCUS11893_PE=3_SV=1	A0A183AY58	84.5	4.8e-83	317	62.2	65.1
maker-scaffold10x_432_pilon-augustus-gene-0.57-mRNA-1_transcript=maker-scaffold10x_432_pilon-augustus-gene-0.57-mRNA-1_gene=maker-scaffold10x_432_pilon-augustus-gene-0.57	A0A183AZL0|A0A183AZL0_9TREM_HABP4_PAI-RBP1_domain-containing_protein_OS=Echinostoma_caproni_OX=27848_GN=ECPE_LOCUS12395_PE=4_SV=1	A0A183AZL0	54.6	4.8e-18	101.7	23.8	24.3
maker-scaffold10x_1652_pilon-snap-gene-0.0-mRNA-1_transcript=maker-scaffold10x_1652_pilon-snap-gene-0.0-mRNA-1_gene=maker-scaffold10x_1652_pilon-snap-gene-0.0	A0A183B1K1|A0A183B1K1_9TREM_Derlin_OS=Echinostoma_caproni_OX=27848_GN=ECPE_LOCUS13086_PE=3_SV=1	A0A183B1K1	95.7	2e-127	464.2	100	100
maker-scaffold10x_813_pilon-augustus-gene-0.34-mRNA-1_transcript=maker-scaffold10x_813_pilon-augustus-gene-0.34-mRNA-1_gene=maker-scaffold10x_813_pilon-augustus-gene-0.34	A0A183B575|A0A183B575_9TREM_KH_domain-containing_protein_OS=Echinostoma_caproni_OX=27848_GN=ECPE_LOCUS14360_PE=4_SV=1	A0A183B575	68.1	1.8e-71	278.5	71.1	85.1
maker-scaffold10x_226_pilon-snap-gene-0.84-mRNA-1_transcript=maker-scaffold10x_226_pilon-snap-gene-0.84-mRNA-1_gene=maker-scaffold10x_226_pilon-snap-gene-0.84	A0A183B6B0|A0A183B6B0_9TREM_TM2_domain-containing_protein_OS=Echinostoma_caproni_OX=27848_GN=ECPE_LOCUS14745_PE=4_SV=1	A0A183B6B0	89.2	1.5e-79	306.2	31.1	80.1
maker-scaffold10x_1651_pilon-augustus-gene-0.5-mRNA-1_transcript=maker-scaffold10x_1651_pilon-augustus-gene-0.5-mRNA-1_gene=maker-scaffold10x_1651_pilon-augustus-gene-0.5	A0A183B782|A0A183B782_9TREM_Endo/exonuclease/phosphatase_domain-containing_protein_OS=Echinostoma_caproni_OX=27848_GN=ECPE_LOCUS15067_PE=4_SV=1	A0A183B782	82.1	4.2e-71	276.9	73.3	22.1
maker-scaffold10x_2039_pilon-snap-gene-0.4-mRNA-1_transcript=maker-scaffold10x_2039_pilon-snap-gene-0.4-mRNA-1_gene=maker-scaffold10x_2039_pilon-snap-gene-0.4	A0A183BAX3|A0A183BAX3_9TREM_Fanconi_A_N_domain-containing_protein_OS=Echinostoma_caproni_OX=27848_GN=ECPE_LOCUS16358_PE=4_SV=1	A0A183BAX3	59.5	2.5e-100	375.2	68.8	84.3
snap_masked-scaffold10x_485_pilon-processed-gene-0.45-mRNA-1_transcript=snap_masked-scaffold10x_485_pilon-processed-gene-0.45-mRNA-1_gene=snap_masked-scaffold10x_485_pilon-processed-gene-0.45	A0A183BB32|A0A183BB32_9TREM_G_protein_gamma_domain-containing_protein_OS=Echinostoma_caproni_OX=27848_GN=ECPE_LOCUS16417_PE=4_SV=1	A0A183BB32	88.1	1.5e-27	130.6	100	100
maker-scaffold10x_185_pilon-pred_gff_StringTie-gene-0.31-mRNA-1_transcript=maker-scaffold10x_185_pilon-pred_gff_StringTie-gene-0.31-mRNA-1_gene=maker-scaffold10x_185_pilon-pred_gff_StringTie-gene-0.31	A0A183BED8|A0A183BED8_9TREM_Peptidase_A2_domain-containing_protein_OS=Echinostoma_caproni_OX=27848_GN=ECPE_LOCUS17573_PE=4_SV=1	A0A183BED8	32.9	3.9e-43	185.3	71.8	92.6
maker-scaffold10x_2520_pilon-snap-gene-0.0-mRNA-1_transcript=maker-scaffold10x_2520_pilon-snap-gene-0.0-mRNA-1_gene=maker-scaffold10x_2520_pilon-snap-gene-0.0	A0A183BEM0|A0A183BEM0_9TREM_CCHC-type_domain-containing_protein_OS=Echinostoma_caproni_OX=27848_GN=ECPE_LOCUS17655_PE=4_SV=1	A0A183BEM0	51.1	1.7e-16	95.1	55.8	39.7
maker-scaffold10x_759_pilon-augustus-gene-0.33-mRNA-1_transcript=maker-scaffold10x_759_pilon-augustus-gene-0.33-mRNA-1_gene=maker-scaffold10x_759_pilon-augustus-gene-0.33	A0A183BEW5|A0A183BEW5_9TREM_Ig-like_domain-containing_protein_OS=Echinostoma_caproni_OX=27848_GN=ECPE_LOCUS17750_PE=4_SV=1	A0A183BEW5	36.5	2.4e-08	68.2	53.3	83.5
snap_masked-scaffold10x_1611_pilon-processed-gene-0.6-mRNA-1_transcript=snap_masked-scaffold10x_1611_pilon-processed-gene-0.6-mRNA-1_gene=snap_masked-scaffold10x_1611_pilon-processed-gene-0.6	A0A183BF78|A0A183BF78_9TREM_Reverse_transcriptase_domain-containing_protein_OS=Echinostoma_caproni_OX=27848_GN=ECPE_LOCUS17863_PE=4_SV=1	A0A183BF78	56.3	1.6e-07	65.5	34.8	18.9
maker-scaffold10x_996_pilon-snap-gene-0.11-mRNA-1_transcript=maker-scaffold10x_996_pilon-snap-gene-0.11-mRNA-1_gene=maker-scaffold10x_996_pilon-snap-gene-0.11	A0A183BGN4|A0A183BGN4_9TREM_AP_complex_subunit_sigma_OS=Echinostoma_caproni_OX=27848_GN=ECPE_LOCUS18369_PE=3_SV=1	A0A183BGN4	100	9e-67	262.3	70.3	91.5
snap_masked-scaffold10x_764_pilon-processed-gene-0.54-mRNA-1_transcript=snap_masked-scaffold10x_764_pilon-processed-gene-0.54-mRNA-1_gene=snap_masked-scaffold10x_764_pilon-processed-gene-0.54	A0A183K5U5|A0A183K5U5_9TREM_Sm_domain-containing_protein_OS=Schistosoma_curassoni_OX=6186_GN=SCUD_LOCUS10370_PE=4_SV=1	A0A183K5U5	84.9	1.6e-69	271.6	85.6	85.4
maker-scaffold10x_784_pilon-augustus-gene-0.15-mRNA-1_transcript=maker-scaffold10x_784_pilon-augustus-gene-0.15-mRNA-1_gene=maker-scaffold10x_784_pilon-augustus-gene-0.15	A0A183KJM1|A0A183KJM1_9TREM_FHA_domain-containing_protein_OS=Schistosoma_curassoni_OX=6186_GN=SCUD_LOCUS15228_PE=4_SV=1	A0A183KJM1	39.8	3e-93	351.7	99.2	99
augustus_masked-scaffold10x_377_pilon-processed-gene-0.181-mRNA-1_transcript=augustus_masked-scaffold10x_377_pilon-processed-gene-0.181-mRNA-1_gene=augustus_masked-scaffold10x_377_pilon-processed-gene-0.181	A0A183LCG8|A0A183LCG8_9TREM_Histone_H3_OS=Schistosoma_margrebowiei_OX=48269_GN=SMRZ_LOCUS1493_PE=3_SV=1	A0A183LCG8	100	1.4e-64	254.6	100	100
maker-scaffold10x_203_pilon-snap-gene-0.96-mRNA-1_transcript=maker-scaffold10x_203_pilon-snap-gene-0.96-mRNA-1_gene=maker-scaffold10x_203_pilon-snap-gene-0.96	A0A183LG24|A0A183LG24_9TREM_Protein_kinase_domain-containing_protein_OS=Schistosoma_margrebowiei_OX=48269_GN=SMRZ_LOCUS2749_PE=4_SV=1	A0A183LG24	100	2.7e-06	60.1	37.3	15.1
maker-scaffold10x_102_pilon-snap-gene-0.55-mRNA-1_transcript=maker-scaffold10x_102_pilon-snap-gene-0.55-mRNA-1_gene=maker-scaffold10x_102_pilon-snap-gene-0.55	A0A183MJQ8|A0A183MJQ8_9TREM_EF-hand_domain-containing_protein_OS=Schistosoma_margrebowiei_OX=48269_GN=SMRZ_LOCUS16283_PE=4_SV=1	A0A183MJQ8	30.2	2.7e-15	92.4	53.7	39.1
maker-scaffold10x_254_pilon-snap-gene-0.29-mRNA-1_transcript=maker-scaffold10x_254_pilon-snap-gene-0.29-mRNA-1_gene=maker-scaffold10x_254_pilon-snap-gene-0.29	A0A183Q8H8|A0A183Q8H8_9TREM_Reverse_transcriptase_domain-containing_protein_OS=Schistosoma_mattheei_OX=31246_GN=SMTD_LOCUS22914_PE=4_SV=1	A0A183Q8H8	49.3	1.4e-10	75.1	54.6	63.4
maker-scaffold10x_204_pilon-snap-gene-0.38-mRNA-1_transcript=maker-scaffold10x_204_pilon-snap-gene-0.38-mRNA-1_gene=maker-scaffold10x_204_pilon-snap-gene-0.38	A0A183RC01|A0A183RC01_9TREM_MFS_domain-containing_protein_OS=Schistosoma_rodhaini_OX=6188_PE=4_SV=1	A0A183RC01	38.7	1e-13	85.5	84.8	90.6
maker-scaffold10x_654_pilon-snap-gene-0.166-mRNA-1_transcript=maker-scaffold10x_654_pilon-snap-gene-0.166-mRNA-1_gene=maker-scaffold10x_654_pilon-snap-gene-0.166	A0A1C8F9S1|A0A1C8F9S1_FASHE_CaBP1_OS=Fasciola_hepatica_OX=6192_GN=D915_003183_PE=2_SV=1	A0A1C8F9S1	100	3.2e-106	394.4	48	100
maker-scaffold10x_993_pilon-snap-gene-0.20-mRNA-1_transcript=maker-scaffold10x_993_pilon-snap-gene-0.20-mRNA-1_gene=maker-scaffold10x_993_pilon-snap-gene-0.20	A0A1D2MEX4|A0A1D2MEX4_ORCCI_Beta-1,4-N-acetylgalactosaminyltransferase_bre-4_OS=Orchesella_cincta_OX=48709_GN=Ocin01_15137_PE=4_SV=1	A0A1D2MEX4	32.1	8.8e-31	143.7	73.1	71.4
maker-scaffold10x_293_pilon-snap-gene-0.143-mRNA-1_transcript=maker-scaffold10x_293_pilon-snap-gene-0.143-mRNA-1_gene=maker-scaffold10x_293_pilon-snap-gene-0.143	A0A1I8I3L9|A0A1I8I3L9_9PLAT_Peptidyl-prolyl_cis-trans_isomerase_E_OS=Macrostomum_lignano_OX=282301_PE=3_SV=1	A0A1I8I3L9	73.6	1.5e-131	478.4	90.3	98.8
maker-scaffold10x_502_pilon-snap-gene-0.39-mRNA-1_transcript=maker-scaffold10x_502_pilon-snap-gene-0.39-mRNA-1_gene=maker-scaffold10x_502_pilon-snap-gene-0.39	A0A1J1HQ04|A0A1J1HQ04_9DIPT_CLUMA_CG003286,_isoform_A_OS=Clunio_marinus_OX=568069_GN=putative_Actin-5C_PE=3_SV=1	A0A1J1HQ04	74.4	0	1069.3	87.6	99.2
maker-scaffold10x_973_pilon-snap-gene-0.76-mRNA-1_transcript=maker-scaffold10x_973_pilon-snap-gene-0.76-mRNA-1_gene=maker-scaffold10x_973_pilon-snap-gene-0.76	A0A1J1HQ04|A0A1J1HQ04_9DIPT_CLUMA_CG003286,_isoform_A_OS=Clunio_marinus_OX=568069_GN=putative_Actin-5C_PE=3_SV=1	A0A1J1HQ04	88.1	0	1375.5	99.3	100
snap_masked-scaffold10x_502_pilon-processed-gene-0.0-mRNA-1_transcript=snap_masked-scaffold10x_502_pilon-processed-gene-0.0-mRNA-1_gene=snap_masked-scaffold10x_502_pilon-processed-gene-0.0	A0A1J1HQ04|A0A1J1HQ04_9DIPT_CLUMA_CG003286,_isoform_A_OS=Clunio_marinus_OX=568069_GN=putative_Actin-5C_PE=3_SV=1	A0A1J1HQ04	71.9	4.4e-260	906	95.6	87.7
maker-scaffold10x_1632_pilon-snap-gene-0.5-mRNA-1_transcript=maker-scaffold10x_1632_pilon-snap-gene-0.5-mRNA-1_gene=maker-scaffold10x_1632_pilon-snap-gene-0.5	A0A1P6BY67|A0A1P6BY67_BRUMA_BMA-UBQ-1,_isoform_a;_BMA-UBQ-1,_isoform_e_OS=Brugia_malayi_OX=6279_GN=Bma-ubq-1_PE=4_SV=1	A0A1P6BY67	86.9	2.9e-128	467.2	100	68
maker-scaffold10x_617_pilon-augustus-gene-0.176-mRNA-1_transcript=maker-scaffold10x_617_pilon-augustus-gene-0.176-mRNA-1_gene=maker-scaffold10x_617_pilon-augustus-gene-0.176	A0A1S3HTJ1|A0A1S3HTJ1_LINUN_uncharacterized_protein_C9orf85_homolog_OS=Lingula_unguis_OX=7574_GN=LOC106158048_PE=4_SV=1	A0A1S3HTJ1	47.7	1.4e-33	152.1	84.9	98.3
maker-scaffold10x_77_pilon-snap-gene-0.22-mRNA-1_transcript=maker-scaffold10x_77_pilon-snap-gene-0.22-mRNA-1_gene=maker-scaffold10x_77_pilon-snap-gene-0.22	A0A1S3JPE1|A0A1S3JPE1_LINUN_histone-lysine_N-methyltransferase_SETD1B-A_OS=Lingula_unguis_OX=7574_GN=LOC106174841_PE=4_SV=1	A0A1S3JPE1	43.3	2.3e-06	63.5	14.1	10
maker-scaffold10x_1068_pilon-snap-gene-0.45-mRNA-1_transcript=maker-scaffold10x_1068_pilon-snap-gene-0.45-mRNA-1_gene=maker-scaffold10x_1068_pilon-snap-gene-0.45	A0A1S3KDS2|A0A1S3KDS2_LINUN_uncharacterized_protein_C4orf22_homolog_OS=Lingula_unguis_OX=7574_GN=LOC106180819_PE=4_SV=1	A0A1S3KDS2	67	9.9e-84	318.9	96	100
maker-scaffold10x_281_pilon-snap-gene-0.160-mRNA-1_transcript=maker-scaffold10x_281_pilon-snap-gene-0.160-mRNA-1_gene=maker-scaffold10x_281_pilon-snap-gene-0.160	A0A1S4BDS0|A0A1S4BDS0_TOBAC_Histone_H4_OS=Nicotiana_tabacum_OX=4097_GN=LOC107807147_PE=3_SV=1	A0A1S4BDS0	91	8.4e-78	299.3	70.2	84.3
maker-scaffold10x_596_pilon-snap-gene-0.37-mRNA-1_transcript=maker-scaffold10x_596_pilon-snap-gene-0.37-mRNA-1_gene=maker-scaffold10x_596_pilon-snap-gene-0.37	A0A1S8WGM7|A0A1S8WGM7_9TREM_Ctf8_OS=Opisthorchis_viverrini_OX=6198_GN=X801_10627_PE=4_SV=1	A0A1S8WGM7	54.9	3.9e-19	103.2	72.4	66.4
snap_masked-scaffold10x_61_pilon-processed-gene-0.24-mRNA-1_transcript=snap_masked-scaffold10x_61_pilon-processed-gene-0.24-mRNA-1_gene=snap_masked-scaffold10x_61_pilon-processed-gene-0.24	A0A1S8WGP4|A0A1S8WGP4_9TREM_C2H2-type_domain-containing_protein_OS=Opisthorchis_viverrini_OX=6198_GN=X801_10618_PE=4_SV=1	A0A1S8WGP4	34.9	2e-40	176.8	65.8	57.7
maker-scaffold10x_21_pilon-snap-gene-0.48-mRNA-1_transcript=maker-scaffold10x_21_pilon-snap-gene-0.48-mRNA-1_gene=maker-scaffold10x_21_pilon-snap-gene-0.48	A0A1S8WHK6|A0A1S8WHK6_9TREM_Immunoglobulin_domain_protein_OS=Opisthorchis_viverrini_OX=6198_GN=X801_10275_PE=4_SV=1	A0A1S8WHK6	67.9	1.8e-131	478.4	78.9	93.2
maker-scaffold10x_331_pilon-snap-gene-0.49-mRNA-1_transcript=maker-scaffold10x_331_pilon-snap-gene-0.49-mRNA-1_gene=maker-scaffold10x_331_pilon-snap-gene-0.49	A0A1S8WI53|A0A1S8WI53_9TREM_LIM_domain_protein_(Fragment)_OS=Opisthorchis_viverrini_OX=6198_GN=X801_10116_PE=4_SV=1	A0A1S8WI53	64.9	2.1e-21	111.3	50.3	33.8
maker-scaffold10x_1175_pilon-snap-gene-0.24-mRNA-1_transcript=maker-scaffold10x_1175_pilon-snap-gene-0.24-mRNA-1_gene=maker-scaffold10x_1175_pilon-snap-gene-0.24	A0A1S8WIR0|A0A1S8WIR0_9TREM_Protoheme_IX_farnesyltransferase_(Fragment)_OS=Opisthorchis_viverrini_OX=6198_GN=X801_10069_PE=4_SV=1	A0A1S8WIR0	45.9	7.6e-93	350.1	97	78.3
maker-scaffold10x_93_pilon-snap-gene-0.116-mRNA-1_transcript=maker-scaffold10x_93_pilon-snap-gene-0.116-mRNA-1_gene=maker-scaffold10x_93_pilon-snap-gene-0.116	A0A1S8WJ37|A0A1S8WJ37_9TREM_Protein,_SNF2_family_OS=Opisthorchis_viverrini_OX=6198_GN=X801_09762_PE=4_SV=1	A0A1S8WJ37	50.6	0	1725.3	99.8	99
maker-scaffold10x_22_pilon-snap-gene-0.130-mRNA-1_transcript=maker-scaffold10x_22_pilon-snap-gene-0.130-mRNA-1_gene=maker-scaffold10x_22_pilon-snap-gene-0.130	A0A1S8WM38|A0A1S8WM38_9TREM_SH3_domain-binding_protein_5_(Fragment)_OS=Opisthorchis_viverrini_OX=6198_GN=X801_08680_PE=4_SV=1	A0A1S8WM38	51.6	1.8e-57	232.6	54.4	48.7
maker-scaffold10x_926_pilon-snap-gene-0.123-mRNA-1_transcript=maker-scaffold10x_926_pilon-snap-gene-0.123-mRNA-1_gene=maker-scaffold10x_926_pilon-snap-gene-0.123	A0A1S8WQZ1|A0A1S8WQZ1_9TREM_PAN_domain_protein_(Fragment)_OS=Opisthorchis_viverrini_OX=6198_GN=X801_07254_PE=4_SV=1	A0A1S8WQZ1	27	8.5e-18	100.1	86.6	90
maker-scaffold10x_1115_pilon-snap-gene-0.14-mRNA-1_transcript=maker-scaffold10x_1115_pilon-snap-gene-0.14-mRNA-1_gene=maker-scaffold10x_1115_pilon-snap-gene-0.14	A0A1S8WRH1|A0A1S8WRH1_9TREM_Mpp10_protein_(Fragment)_OS=Opisthorchis_viverrini_OX=6198_GN=X801_07199_PE=4_SV=1	A0A1S8WRH1	68.4	2.4e-89	337.8	95.8	98.4
maker-scaffold10x_720_pilon-snap-gene-0.21-mRNA-1_transcript=maker-scaffold10x_720_pilon-snap-gene-0.21-mRNA-1_gene=maker-scaffold10x_720_pilon-snap-gene-0.21	A0A1S8WS81|A0A1S8WS81_9TREM_DnaJ_domain_protein_OS=Opisthorchis_viverrini_OX=6198_GN=X801_07033_PE=4_SV=1	A0A1S8WS81	54.9	2e-145	525	99.8	99.8
maker-scaffold10x_820_pilon-snap-gene-0.10-mRNA-1_transcript=maker-scaffold10x_820_pilon-snap-gene-0.10-mRNA-1_gene=maker-scaffold10x_820_pilon-snap-gene-0.10	A0A1S8WTX0|A0A1S8WTX0_9TREM_EGF-like_domain_protein_OS=Opisthorchis_viverrini_OX=6198_GN=X801_06497_PE=4_SV=1	A0A1S8WTX0	34.5	1.8e-120	442.6	89.5	92.1
maker-scaffold10x_1206_pilon-snap-gene-0.0-mRNA-1_transcript=maker-scaffold10x_1206_pilon-snap-gene-0.0-mRNA-1_gene=maker-scaffold10x_1206_pilon-snap-gene-0.0	A0A1S8WUB7|A0A1S8WUB7_9TREM_Kinase_domain_protein_(Fragment)_OS=Opisthorchis_viverrini_OX=6198_GN=X801_06106_PE=4_SV=1	A0A1S8WUB7	47.3	8.7e-65	256.5	90.2	63
maker-scaffold10x_205_pilon-augustus-gene-0.39-mRNA-1_transcript=maker-scaffold10x_205_pilon-augustus-gene-0.39-mRNA-1_gene=maker-scaffold10x_205_pilon-augustus-gene-0.39	A0A1S8WUB7|A0A1S8WUB7_9TREM_Kinase_domain_protein_(Fragment)_OS=Opisthorchis_viverrini_OX=6198_GN=X801_06106_PE=4_SV=1	A0A1S8WUB7	77.9	6.9e-89	336.7	60	38.7
maker-scaffold10x_293_pilon-snap-gene-0.158-mRNA-1_transcript=maker-scaffold10x_293_pilon-snap-gene-0.158-mRNA-1_gene=maker-scaffold10x_293_pilon-snap-gene-0.158	A0A1S8WVM9|A0A1S8WVM9_9TREM_Gram_pos_anchor_domain-containing_protein_(Fragment)_OS=Opisthorchis_viverrini_OX=6198_GN=X801_05638_PE=4_SV=1	A0A1S8WVM9	39	4.7e-47	197.6	96.3	89.7
maker-scaffold10x_794_pilon-snap-gene-0.118-mRNA-1_transcript=maker-scaffold10x_794_pilon-snap-gene-0.118-mRNA-1_gene=maker-scaffold10x_794_pilon-snap-gene-0.118	A0A1S8WWC2|A0A1S8WWC2_9TREM_Immunoglobulin_V-set_domain_protein_(Fragment)_OS=Opisthorchis_viverrini_OX=6198_GN=X801_05442_PE=4_SV=1	A0A1S8WWC2	39.3	1.4e-99	372.9	93.5	94
maker-scaffold10x_1125_pilon-snap-gene-0.124-mRNA-1_transcript=maker-scaffold10x_1125_pilon-snap-gene-0.124-mRNA-1_gene=maker-scaffold10x_1125_pilon-snap-gene-0.124	A0A1S8WXJ4|A0A1S8WXJ4_9TREM_WD_domain,_G-beta_repeat_protein_(Fragment)_OS=Opisthorchis_viverrini_OX=6198_GN=X801_04975_PE=4_SV=1	A0A1S8WXJ4	86	1.3e-277	964.5	81	81.2
maker-scaffold10x_1920_pilon-snap-gene-0.5-mRNA-1_transcript=maker-scaffold10x_1920_pilon-snap-gene-0.5-mRNA-1_gene=maker-scaffold10x_1920_pilon-snap-gene-0.5	A0A1S8WXN1|A0A1S8WXN1_9TREM_Aspartyl_protease_(Fragment)_OS=Opisthorchis_viverrini_OX=6198_GN=X801_04928_PE=4_SV=1	A0A1S8WXN1	39.9	9.6e-26	126.3	72.7	29
maker-scaffold10x_13_pilon-snap-gene-0.72-mRNA-1_transcript=maker-scaffold10x_13_pilon-snap-gene-0.72-mRNA-1_gene=maker-scaffold10x_13_pilon-snap-gene-0.72	A0A1S8WXW9|A0A1S8WXW9_9TREM_Ubiquitin--protein_ligase_OS=Opisthorchis_viverrini_OX=6198_GN=X801_04772_PE=3_SV=1	A0A1S8WXW9	94.6	7.8e-95	355.5	100	100
maker-scaffold10x_720_pilon-snap-gene-0.6-mRNA-1_transcript=maker-scaffold10x_720_pilon-snap-gene-0.6-mRNA-1_gene=maker-scaffold10x_720_pilon-snap-gene-0.6	A0A1S8WY23|A0A1S8WY23_9TREM_Fibronectin_type_III_domain_protein_(Fragment)_OS=Opisthorchis_viverrini_OX=6198_GN=X801_04778_PE=4_SV=1	A0A1S8WY23	45.2	4.3e-100	375.2	46.8	50.5
maker-scaffold10x_520_pilon-snap-gene-2.150-mRNA-1_transcript=maker-scaffold10x_520_pilon-snap-gene-2.150-mRNA-1_gene=maker-scaffold10x_520_pilon-snap-gene-2.150	A0A1S8WY46|A0A1S8WY46_9TREM_Ribosomal_protein_L35Ae_OS=Opisthorchis_viverrini_OX=6198_GN=X801_04683_PE=3_SV=1	A0A1S8WY46	83.6	3.5e-54	219.9	100	100
maker-scaffold10x_1593_pilon-snap-gene-0.35-mRNA-1_transcript=maker-scaffold10x_1593_pilon-snap-gene-0.35-mRNA-1_gene=maker-scaffold10x_1593_pilon-snap-gene-0.35	A0A1S8WYI3|A0A1S8WYI3_9TREM_A20-like_zinc_finger_OS=Opisthorchis_viverrini_OX=6198_GN=X801_04668_PE=4_SV=1	A0A1S8WYI3	59.4	6.9e-173	616.3	99.4	97.4
maker-scaffold10x_626_pilon-snap-gene-0.57-mRNA-1_transcript=maker-scaffold10x_626_pilon-snap-gene-0.57-mRNA-1_gene=maker-scaffold10x_626_pilon-snap-gene-0.57	A0A1S8WZC0|A0A1S8WZC0_9TREM_CCDC66_domain-containing_protein_(Fragment)_OS=Opisthorchis_viverrini_OX=6198_GN=X801_04324_PE=4_SV=1	A0A1S8WZC0	29	6.8e-52	214.5	95.1	44.9
maker-scaffold10x_102_pilon-snap-gene-0.53-mRNA-1_transcript=maker-scaffold10x_102_pilon-snap-gene-0.53-mRNA-1_gene=maker-scaffold10x_102_pilon-snap-gene-0.53	A0A1S8WZH8|A0A1S8WZH8_9TREM_Leucine_Rich_repeat-containing_domain_protein_OS=Opisthorchis_viverrini_OX=6198_GN=X801_04290_PE=4_SV=1	A0A1S8WZH8	62.3	1.7e-303	1050.8	96.5	100
maker-scaffold10x_1163_pilon-snap-gene-0.14-mRNA-1_transcript=maker-scaffold10x_1163_pilon-snap-gene-0.14-mRNA-1_gene=maker-scaffold10x_1163_pilon-snap-gene-0.14	A0A1S8X1A7|A0A1S8X1A7_9TREM_Ig-like_domain-containing_protein_(Fragment)_OS=Opisthorchis_viverrini_OX=6198_GN=X801_03615_PE=4_SV=1	A0A1S8X1A7	26.7	8.3e-11	78.2	26.4	47.1
maker-scaffold10x_742_pilon-snap-gene-0.84-mRNA-1_transcript=maker-scaffold10x_742_pilon-snap-gene-0.84-mRNA-1_gene=maker-scaffold10x_742_pilon-snap-gene-0.84	A0A1S8X1Q0|A0A1S8X1Q0_9TREM_Transporter,_major_facilitator_family_protein_(Fragment)_OS=Opisthorchis_viverrini_OX=6198_GN=X801_03566_PE=4_SV=1	A0A1S8X1Q0	26.5	1.9e-29	139.8	76.5	91.5
maker-scaffold10x_977_pilon-snap-gene-0.69-mRNA-1_transcript=maker-scaffold10x_977_pilon-snap-gene-0.69-mRNA-1_gene=maker-scaffold10x_977_pilon-snap-gene-0.69	A0A1S8X3K6|A0A1S8X3K6_9TREM_SGT1_protein_(Fragment)_OS=Opisthorchis_viverrini_OX=6198_GN=X801_02848_PE=4_SV=1	A0A1S8X3K6	33.4	2.7e-113	419.1	98.4	93.8
maker-scaffold10x_145_pilon-augustus-gene-2.282-mRNA-1_transcript=maker-scaffold10x_145_pilon-augustus-gene-2.282-mRNA-1_gene=maker-scaffold10x_145_pilon-augustus-gene-2.282	A0A1S8X3N7|A0A1S8X3N7_9TREM_AAR2_protein_OS=Opisthorchis_viverrini_OX=6198_GN=X801_02816_PE=4_SV=1	A0A1S8X3N7	65.5	2.1e-26	127.1	94.3	19.4
maker-scaffold10x_418_pilon-snap-gene-0.98-mRNA-1_transcript=maker-scaffold10x_418_pilon-snap-gene-0.98-mRNA-1_gene=maker-scaffold10x_418_pilon-snap-gene-0.98	A0A1S8X4N2|A0A1S8X4N2_9TREM_von_Willebrand_factor_type_C_domain_protein_OS=Opisthorchis_viverrini_OX=6198_GN=X801_02466_PE=4_SV=1	A0A1S8X4N2	50.2	3.1e-59	238	67.8	46.8
maker-scaffold10x_487_pilon-snap-gene-0.224-mRNA-1_transcript=maker-scaffold10x_487_pilon-snap-gene-0.224-mRNA-1_gene=maker-scaffold10x_487_pilon-snap-gene-0.224	A0A1S8X5I0|A0A1S8X5I0_9TREM_Peptidyl-prolyl_cis-trans_isomerase,_cyclophilin-type_(Fragment)_OS=Opisthorchis_viverrini_OX=6198_GN=X801_02171_PE=4_SV=1	A0A1S8X5I0	89.8	3.1e-98	367.1	83.1	12
maker-scaffold10x_97_pilon-augustus-gene-0.152-mRNA-1_transcript=maker-scaffold10x_97_pilon-augustus-gene-0.152-mRNA-1_gene=maker-scaffold10x_97_pilon-augustus-gene-0.152	A0A1S8X641|A0A1S8X641_9TREM_Ndr_family_protein_(Fragment)_OS=Opisthorchis_viverrini_OX=6198_GN=X801_01925_PE=4_SV=1	A0A1S8X641	35.3	2.2e-36	162.5	80.5	94.5
maker-scaffold10x_13_pilon-augustus-gene-0.17-mRNA-1_transcript=maker-scaffold10x_13_pilon-augustus-gene-0.17-mRNA-1_gene=maker-scaffold10x_13_pilon-augustus-gene-0.17	A0A1S8X659|A0A1S8X659_9TREM_Ig-like_domain-containing_protein_(Fragment)_OS=Opisthorchis_viverrini_OX=6198_GN=X801_01918_PE=4_SV=1	A0A1S8X659	55.7	3.2e-147	531.6	69.3	95.3
maker-scaffold10x_147_pilon-snap-gene-0.14-mRNA-1_transcript=maker-scaffold10x_147_pilon-snap-gene-0.14-mRNA-1_gene=maker-scaffold10x_147_pilon-snap-gene-0.14	A0A1S8X6I6|A0A1S8X6I6_9TREM_FEZ-like_protein_OS=Opisthorchis_viverrini_OX=6198_GN=X801_01761_PE=4_SV=1	A0A1S8X6I6	59.3	9.7e-120	439.5	96.1	68.2
snap_masked-scaffold10x_273_pilon-processed-gene-0.19-mRNA-1_transcript=snap_masked-scaffold10x_273_pilon-processed-gene-0.19-mRNA-1_gene=snap_masked-scaffold10x_273_pilon-processed-gene-0.19	A0A1S8X6L8|A0A1S8X6L8_9TREM_Ubiquitin--protein_ligase_OS=Opisthorchis_viverrini_OX=6198_GN=X801_01710_PE=3_SV=1	A0A1S8X6L8	43.1	1.1e-27	132.1	98	38.3
maker-scaffold10x_314_pilon-snap-gene-0.5-mRNA-1_transcript=maker-scaffold10x_314_pilon-snap-gene-0.5-mRNA-1_gene=maker-scaffold10x_314_pilon-snap-gene-0.5	A0A1S8X7D3|A0A1S8X7D3_9TREM_Ribosomal_L18p/L5e_family_protein_(Fragment)_OS=Opisthorchis_viverrini_OX=6198_GN=X801_01489_PE=4_SV=1	A0A1S8X7D3	71.1	9.8e-12	78.2	59.2	15.7
maker-scaffold10x_1086_pilon-snap-gene-0.95-mRNA-1_transcript=maker-scaffold10x_1086_pilon-snap-gene-0.95-mRNA-1_gene=maker-scaffold10x_1086_pilon-snap-gene-0.95	A0A1S8X7D9|A0A1S8X7D9_9TREM_DNA-directed_RNA_polymerase_subunit_beta_OS=Opisthorchis_viverrini_OX=6198_GN=X801_01472_PE=3_SV=1	A0A1S8X7D9	94.4	0	2287.3	99.6	95.6
snap_masked-scaffold10x_631_pilon-processed-gene-0.11-mRNA-1_transcript=snap_masked-scaffold10x_631_pilon-processed-gene-0.11-mRNA-1_gene=snap_masked-scaffold10x_631_pilon-processed-gene-0.11	A0A1S8X830|A0A1S8X830_9TREM_WD_domain,_G-beta_repeat_protein_OS=Opisthorchis_viverrini_OX=6198_GN=X801_01189_PE=4_SV=1	A0A1S8X830	34	1.6e-26	129	98.4	18.2
maker-scaffold10x_15_pilon-snap-gene-0.31-mRNA-1_transcript=maker-scaffold10x_15_pilon-snap-gene-0.31-mRNA-1_gene=maker-scaffold10x_15_pilon-snap-gene-0.31	A0A1S8X8B1|A0A1S8X8B1_9TREM_Kinase_domain_protein_OS=Opisthorchis_viverrini_OX=6198_GN=X801_01190_PE=4_SV=1	A0A1S8X8B1	73.7	0	1191.4	94.6	93.7
maker-scaffold10x_781_pilon-snap-gene-0.65-mRNA-1_transcript=maker-scaffold10x_781_pilon-snap-gene-0.65-mRNA-1_gene=maker-scaffold10x_781_pilon-snap-gene-0.65	A0A1S8X8D3|A0A1S8X8D3_9TREM_Kinase_domain_protein_(Fragment)_OS=Opisthorchis_viverrini_OX=6198_GN=X801_01142_PE=4_SV=1	A0A1S8X8D3	82.6	0	1552.3	98.4	97.1
maker-scaffold10x_756_pilon-snap-gene-0.50-mRNA-1_transcript=maker-scaffold10x_756_pilon-snap-gene-0.50-mRNA-1_gene=maker-scaffold10x_756_pilon-snap-gene-0.50	A0A1S8X8V3|A0A1S8X8V3_9TREM_Zinc_finger,_C2H2_type_(Fragment)_OS=Opisthorchis_viverrini_OX=6198_GN=X801_00971_PE=4_SV=1	A0A1S8X8V3	24.1	3.4e-15	91.7	97.7	76.8
maker-scaffold10x_325_pilon-augustus-gene-0.86-mRNA-1_transcript=maker-scaffold10x_325_pilon-augustus-gene-0.86-mRNA-1_gene=maker-scaffold10x_325_pilon-augustus-gene-0.86	A0A1S8X8V7|A0A1S8X8V7_9TREM_Leucine_Rich_repeat-containing_domain_protein_(Fragment)_OS=Opisthorchis_viverrini_OX=6198_GN=X801_00972_PE=4_SV=1	A0A1S8X8V7	47.5	1.7e-61	245.4	94.2	48.4
maker-scaffold10x_374_pilon-augustus-gene-0.27-mRNA-1_transcript=maker-scaffold10x_374_pilon-augustus-gene-0.27-mRNA-1_gene=maker-scaffold10x_374_pilon-augustus-gene-0.27	A0A1S8X951|A0A1S8X951_9TREM_Transporter,_cation_channel_family_protein_OS=Opisthorchis_viverrini_OX=6198_GN=X801_00897_PE=4_SV=1	A0A1S8X951	69.4	1.8e-146	528.1	97.4	17.2
maker-scaffold10x_1573_pilon-snap-gene-0.46-mRNA-1_transcript=maker-scaffold10x_1573_pilon-snap-gene-0.46-mRNA-1_gene=maker-scaffold10x_1573_pilon-snap-gene-0.46	A0A1S8XAE1|A0A1S8XAE1_9TREM_Tetratricopeptide_repeat_protein_(Fragment)_OS=Opisthorchis_viverrini_OX=6198_GN=X801_00455_PE=4_SV=1	A0A1S8XAE1	31.4	2.2e-42	182.6	85.2	93.4
maker-scaffold10x_1450_pilon-snap-gene-0.14-mRNA-1_transcript=maker-scaffold10x_1450_pilon-snap-gene-0.14-mRNA-1_gene=maker-scaffold10x_1450_pilon-snap-gene-0.14	A0A1S8XB53|A0A1S8XB53_9TREM_MPPN_domain_protein_OS=Opisthorchis_viverrini_OX=6198_GN=X801_00131_PE=4_SV=1	A0A1S8XB53	64.4	4.5e-26	126.3	93.5	16.7
maker-scaffold10x_682_pilon-snap-gene-0.77-mRNA-1_transcript=maker-scaffold10x_682_pilon-snap-gene-0.77-mRNA-1_gene=maker-scaffold10x_682_pilon-snap-gene-0.77	A0A1S8XB64|A0A1S8XB64_9TREM_Polyketide_cyclase/dehydrase_OS=Opisthorchis_viverrini_OX=6198_GN=X801_00175_PE=4_SV=1	A0A1S8XB64	61	3.2e-57	230.7	86.8	88
maker-scaffold10x_1061_pilon-snap-gene-0.98-mRNA-1_transcript=maker-scaffold10x_1061_pilon-snap-gene-0.98-mRNA-1_gene=maker-scaffold10x_1061_pilon-snap-gene-0.98	A0A1W2WE35|A0A1W2WE35_CIOIN_uncharacterized_protein_C2orf81_homolog_OS=Ciona_intestinalis_OX=7719_GN=LOC100177758_PE=4_SV=1	A0A1W2WE35	24.8	2.2e-08	69.7	65.4	81.5
maker-scaffold10x_1115_pilon-snap-gene-0.12-mRNA-1_transcript=maker-scaffold10x_1115_pilon-snap-gene-0.12-mRNA-1_gene=maker-scaffold10x_1115_pilon-snap-gene-0.12	A0A226DYE8|A0A226DYE8_FOLCA_DUF4806_domain-containing_protein_OS=Folsomia_candida_OX=158441_GN=Fcan01_15835_PE=4_SV=1	A0A226DYE8	29	1.3e-11	79	92.6	21.9
maker-scaffold10x_2114_pilon-augustus-gene-0.6-mRNA-1_transcript=maker-scaffold10x_2114_pilon-augustus-gene-0.6-mRNA-1_gene=maker-scaffold10x_2114_pilon-augustus-gene-0.6	A0A2C9KLL8|A0A2C9KLL8_BIOGL_Integrase_catalytic_domain-containing_protein_OS=Biomphalaria_glabrata_OX=6526_GN=106076623_PE=4_SV=1	A0A2C9KLL8	53.8	2.3e-12	81.6	32.5	28.9
maker-scaffold10x_314_pilon-snap-gene-0.17-mRNA-1_transcript=maker-scaffold10x_314_pilon-snap-gene-0.17-mRNA-1_gene=maker-scaffold10x_314_pilon-snap-gene-0.17	A0A2H1BR86|A0A2H1BR86_FASHE_Keratinocyte-associated_protein_2_protein_OS=Fasciola_hepatica_OX=6192_GN=D915_011147_PE=4_SV=1	A0A2H1BR86	97.9	9.2e-42	178.3	94	82.5
maker-scaffold10x_760_pilon-snap-gene-0.9-mRNA-1_transcript=maker-scaffold10x_760_pilon-snap-gene-0.9-mRNA-1_gene=maker-scaffold10x_760_pilon-snap-gene-0.9	A0A2H1BR89|A0A2H1BR89_FASHE_Cold-shock_DNA-binding_domain_protein_(Fragment)_OS=Fasciola_hepatica_OX=6192_GN=D915_16078_PE=4_SV=1	A0A2H1BR89	87.7	2.1e-82	314.3	91.8	100
maker-scaffold10x_2330_pilon-snap-gene-0.2-mRNA-1_transcript=maker-scaffold10x_2330_pilon-snap-gene-0.2-mRNA-1_gene=maker-scaffold10x_2330_pilon-snap-gene-0.2	A0A2H1BR96|A0A2H1BR96_FASHE_Mitochondrial_28S_ribosomal_protein_S29_OS=Fasciola_hepatica_OX=6192_GN=D915_011163_PE=4_SV=1	A0A2H1BR96	100	1.5e-155	557.8	99.3	95
maker-scaffold10x_162_pilon-snap-gene-0.3-mRNA-1_transcript=maker-scaffold10x_162_pilon-snap-gene-0.3-mRNA-1_gene=maker-scaffold10x_162_pilon-snap-gene-0.3	A0A2H1BRA5|A0A2H1BRA5_FASHE_Ribosome_maturation_protein_SBDS_OS=Fasciola_hepatica_OX=6192_GN=D915_011149_PE=4_SV=1	A0A2H1BRA5	100	1.3e-129	471.5	92.6	100
maker-scaffold10x_535_pilon-snap-gene-0.71-mRNA-1_transcript=maker-scaffold10x_535_pilon-snap-gene-0.71-mRNA-1_gene=maker-scaffold10x_535_pilon-snap-gene-0.71	A0A2H1BRC3|A0A2H1BRC3_FASHE_Ribosomal_protein_L19_OS=Fasciola_hepatica_OX=6192_GN=D915_011129_PE=3_SV=1	A0A2H1BRC3	100	1.6e-129	471.5	100	100
maker-scaffold10x_1149_pilon-pred_gff_StringTie-gene-0.104-mRNA-1_transcript=maker-scaffold10x_1149_pilon-pred_gff_StringTie-gene-0.104-mRNA-1_gene=maker-scaffold10x_1149_pilon-pred_gff_StringTie-gene-0.104	A0A2H1BRE1|A0A2H1BRE1_FASHE_Zinc_finger_CDGSH_domain-containing_protein_1_OS=Fasciola_hepatica_OX=6192_GN=D915_010960_PE=4_SV=1	A0A2H1BRE1	86.3	4.2e-49	203	96.7	79.5
maker-scaffold10x_410_pilon-pred_gff_StringTie-gene-0.66-mRNA-1_transcript=maker-scaffold10x_410_pilon-pred_gff_StringTie-gene-0.66-mRNA-1_gene=maker-scaffold10x_410_pilon-pred_gff_StringTie-gene-0.66	A0A2H1BRF2|A0A2H1BRF2_FASHE_Iron-sulfur_cluster_assembly_1_like_protein_mitochondrial_OS=Fasciola_hepatica_OX=6192_GN=D915_011007_PE=4_SV=1	A0A2H1BRF2	100	2.4e-85	323.9	89.9	100
maker-scaffold10x_77_pilon-augustus-gene-0.33-mRNA-1_transcript=maker-scaffold10x_77_pilon-augustus-gene-0.33-mRNA-1_gene=maker-scaffold10x_77_pilon-augustus-gene-0.33	A0A2H1BRI2|A0A2H1BRI2_FASHE_Decaprenyl-diphosphate_synthase_subunit_2_OS=Fasciola_hepatica_OX=6192_GN=D915_010864_PE=4_SV=1	A0A2H1BRI2	100	1.4e-113	417.9	100	100
maker-scaffold10x_23_pilon-augustus-gene-0.67-mRNA-1_transcript=maker-scaffold10x_23_pilon-augustus-gene-0.67-mRNA-1_gene=maker-scaffold10x_23_pilon-augustus-gene-0.67	A0A2H1BRJ0|A0A2H1BRJ0_FASHE_Dcp1-like_decapping_family_protein_OS=Fasciola_hepatica_OX=6192_GN=D915_15912_PE=4_SV=1	A0A2H1BRJ0	87	1.6e-40	174.1	97.8	100
maker-scaffold10x_878_pilon-snap-gene-0.55-mRNA-1_transcript=maker-scaffold10x_878_pilon-snap-gene-0.55-mRNA-1_gene=maker-scaffold10x_878_pilon-snap-gene-0.55	A0A2H1BRJ5|A0A2H1BRJ5_FASHE_CUB_domain-containing_protein_OS=Fasciola_hepatica_OX=6192_GN=D915_15950_PE=4_SV=1	A0A2H1BRJ5	84.4	5.6e-92	347.8	31.2	86.1
maker-scaffold10x_878_pilon-snap-gene-0.56-mRNA-1_transcript=maker-scaffold10x_878_pilon-snap-gene-0.56-mRNA-1_gene=maker-scaffold10x_878_pilon-snap-gene-0.56	A0A2H1BRJ5|A0A2H1BRJ5_FASHE_CUB_domain-containing_protein_OS=Fasciola_hepatica_OX=6192_GN=D915_15950_PE=4_SV=1	A0A2H1BRJ5	64.3	1.6e-70	275	90.4	92.2
maker-scaffold10x_598_pilon-snap-gene-1.105-mRNA-1_transcript=maker-scaffold10x_598_pilon-snap-gene-1.105-mRNA-1_gene=maker-scaffold10x_598_pilon-snap-gene-1.105	A0A2H1BRK6|A0A2H1BRK6_FASHE_Enkurin_domain-containing_protein_OS=Fasciola_hepatica_OX=6192_GN=D915_15871_PE=4_SV=1	A0A2H1BRK6	76.1	3.1e-100	373.6	98.5	97.1
maker-scaffold10x_794_pilon-snap-gene-0.130-mRNA-1_transcript=maker-scaffold10x_794_pilon-snap-gene-0.130-mRNA-1_gene=maker-scaffold10x_794_pilon-snap-gene-0.130	A0A2H1BRL6|A0A2H1BRL6_FASHE_DEAD/DEAH_box_helicase_(Fragment)_OS=Fasciola_hepatica_OX=6192_GN=D915_15886_PE=3_SV=1	A0A2H1BRL6	31.5	9.3e-33	150.2	92.8	97.7
snap_masked-scaffold10x_1068_pilon-processed-gene-0.28-mRNA-1_transcript=snap_masked-scaffold10x_1068_pilon-processed-gene-0.28-mRNA-1_gene=snap_masked-scaffold10x_1068_pilon-processed-gene-0.28	A0A2H1BRL6|A0A2H1BRL6_FASHE_DEAD/DEAH_box_helicase_(Fragment)_OS=Fasciola_hepatica_OX=6192_GN=D915_15886_PE=3_SV=1	A0A2H1BRL6	100	6e-98	365.9	100	44.8
maker-scaffold10x_513_pilon-augustus-gene-1.25-mRNA-1_transcript=maker-scaffold10x_513_pilon-augustus-gene-1.25-mRNA-1_gene=maker-scaffold10x_513_pilon-augustus-gene-1.25	A0A2H1BRL7|A0A2H1BRL7_FASHE_Succinate_dehydrogenase_[ubiquinone]_cytochrome_b_small_subunit_(Fragment)_OS=Fasciola_hepatica_OX=6192_GN=D915_15879_PE=3_SV=1	A0A2H1BRL7	99.1	1.5e-59	238	73.9	91.1
maker-scaffold10x_873_pilon-snap-gene-0.80-mRNA-1_transcript=maker-scaffold10x_873_pilon-snap-gene-0.80-mRNA-1_gene=maker-scaffold10x_873_pilon-snap-gene-0.80	A0A2H1BRN6|A0A2H1BRN6_FASHE_Brix_domain_protein_OS=Fasciola_hepatica_OX=6192_GN=D915_010824_PE=4_SV=1	A0A2H1BRN6	99.6	7.3e-139	502.7	73.3	92.3
maker-scaffold10x_88_pilon-snap-gene-0.7-mRNA-1_transcript=maker-scaffold10x_88_pilon-snap-gene-0.7-mRNA-1_gene=maker-scaffold10x_88_pilon-snap-gene-0.7	A0A2H1BRQ1|A0A2H1BRQ1_FASHE_ATP_synthase,_subunit_E_OS=Fasciola_hepatica_OX=6192_GN=D915_010873_PE=3_SV=1	A0A2H1BRQ1	100	4.5e-113	416.4	100	100
maker-scaffold10x_815_pilon-snap-gene-1.113-mRNA-1_transcript=maker-scaffold10x_815_pilon-snap-gene-1.113-mRNA-1_gene=maker-scaffold10x_815_pilon-snap-gene-1.113	A0A2H1BRQ3|A0A2H1BRQ3_FASHE_Oxidoreductase,_short_chain_dehydrogenase/reductase_family_protein_OS=Fasciola_hepatica_OX=6192_GN=D915_15826_PE=4_SV=1	A0A2H1BRQ3	99.7	2.7e-169	603.6	100	100
maker-scaffold10x_907_pilon-augustus-gene-0.21-mRNA-1_transcript=maker-scaffold10x_907_pilon-augustus-gene-0.21-mRNA-1_gene=maker-scaffold10x_907_pilon-augustus-gene-0.21	A0A2H1BRR4|A0A2H1BRR4_FASHE_Rho_GTPase-activating_protein_8_OS=Fasciola_hepatica_OX=6192_GN=D915_010405_PE=4_SV=1	A0A2H1BRR4	100	2.5e-107	397.1	100	100
maker-scaffold10x_39_pilon-augustus-gene-0.4-mRNA-1_transcript=maker-scaffold10x_39_pilon-augustus-gene-0.4-mRNA-1_gene=maker-scaffold10x_39_pilon-augustus-gene-0.4	A0A2H1BRR9|A0A2H1BRR9_FASHE_UBA/TS-N_domain_protein_OS=Fasciola_hepatica_OX=6192_GN=D915_15803_PE=4_SV=1	A0A2H1BRR9	93.4	0	1198.7	90.1	96.2
maker-scaffold10x_1445_pilon-snap-gene-0.64-mRNA-1_transcript=maker-scaffold10x_1445_pilon-snap-gene-0.64-mRNA-1_gene=maker-scaffold10x_1445_pilon-snap-gene-0.64	A0A2H1BRT5|A0A2H1BRT5_FASHE_Protein_kinase_domain-containing_protein_(Fragment)_OS=Fasciola_hepatica_OX=6192_GN=D915_15809_PE=4_SV=1	A0A2H1BRT5	100	3.4e-166	594	60.1	100
maker-scaffold10x_75_pilon-snap-gene-0.123-mRNA-1_transcript=maker-scaffold10x_75_pilon-snap-gene-0.123-mRNA-1_gene=maker-scaffold10x_75_pilon-snap-gene-0.123	A0A2H1BRV3|A0A2H1BRV3_FASHE_Phosphoglycerate_mutase_family_protein_OS=Fasciola_hepatica_OX=6192_GN=D915_009988_PE=4_SV=1	A0A2H1BRV3	99.8	7.8e-231	808.9	75.2	99.8
maker-scaffold10x_1697_pilon-snap-gene-0.105-mRNA-1_transcript=maker-scaffold10x_1697_pilon-snap-gene-0.105-mRNA-1_gene=maker-scaffold10x_1697_pilon-snap-gene-0.105	A0A2H1BRW2|A0A2H1BRW2_FASHE_Histone_H2A_OS=Fasciola_hepatica_OX=6192_GN=D915_009899_PE=3_SV=1	A0A2H1BRW2	100	1.7e-64	254.2	100	100
maker-scaffold10x_374_pilon-snap-gene-0.36-mRNA-1_transcript=maker-scaffold10x_374_pilon-snap-gene-0.36-mRNA-1_gene=maker-scaffold10x_374_pilon-snap-gene-0.36	A0A2H1BRX2|A0A2H1BRX2_FASHE_Ribosomal_L1_domain-containing_protein_1_OS=Fasciola_hepatica_OX=6192_GN=D915_009865_PE=4_SV=1	A0A2H1BRX2	100	7e-168	599	100	100
snap_masked-scaffold10x_203_pilon-processed-gene-0.26-mRNA-1_transcript=snap_masked-scaffold10x_203_pilon-processed-gene-0.26-mRNA-1_gene=snap_masked-scaffold10x_203_pilon-processed-gene-0.26	A0A2H1BS16|A0A2H1BS16_FASHE_ELAV_protein_2_OS=Fasciola_hepatica_OX=6192_GN=D915_009831_PE=4_SV=1	A0A2H1BS16	100	4e-289	1002.7	81.8	91.7
maker-scaffold10x_802_pilon-snap-gene-0.43-mRNA-1_transcript=maker-scaffold10x_802_pilon-snap-gene-0.43-mRNA-1_gene=maker-scaffold10x_802_pilon-snap-gene-0.43	A0A2H1BS84|A0A2H1BS84_FASHE_SNARE_domain_protein_(Fragment)_OS=Fasciola_hepatica_OX=6192_GN=D915_15585_PE=4_SV=1	A0A2H1BS84	100	4.6e-98	366.7	77.1	98.5
maker-scaffold10x_671_pilon-snap-gene-0.2-mRNA-1_transcript=maker-scaffold10x_671_pilon-snap-gene-0.2-mRNA-1_gene=maker-scaffold10x_671_pilon-snap-gene-0.2	A0A2H1BS99|A0A2H1BS99_FASHE_AD_domain-containing_protein_OS=Fasciola_hepatica_OX=6192_GN=D915_15532_PE=4_SV=1	A0A2H1BS99	89.1	4.3e-63	249.6	100	79
maker-scaffold10x_1089_pilon-augustus-gene-0.8-mRNA-1_transcript=maker-scaffold10x_1089_pilon-augustus-gene-0.8-mRNA-1_gene=maker-scaffold10x_1089_pilon-augustus-gene-0.8	A0A2H1BSA5|A0A2H1BSA5_FASHE_Saposin-like_type_B,_region_1_(Fragment)_OS=Fasciola_hepatica_OX=6192_GN=D915_15543_PE=4_SV=1	A0A2H1BSA5	100	6.6e-36	158.7	90.9	74.1
maker-scaffold10x_874_pilon-snap-gene-0.8-mRNA-1_transcript=maker-scaffold10x_874_pilon-snap-gene-0.8-mRNA-1_gene=maker-scaffold10x_874_pilon-snap-gene-0.8	A0A2H1BSB0|A0A2H1BSB0_FASHE_Lin-52-like_family_protein_OS=Fasciola_hepatica_OX=6192_GN=D915_15563_PE=4_SV=1	A0A2H1BSB0	90.5	7.5e-56	225.3	100	100
maker-scaffold10x_166_pilon-snap-gene-0.14-mRNA-1_transcript=maker-scaffold10x_166_pilon-snap-gene-0.14-mRNA-1_gene=maker-scaffold10x_166_pilon-snap-gene-0.14	A0A2H1BSB3|A0A2H1BSB3_FASHE_RT_RNaseH_2_domain-containing_protein_OS=Fasciola_hepatica_OX=6192_GN=D915_15523_PE=4_SV=1	A0A2H1BSB3	96.2	4.6e-35	157.9	22.1	79
maker-scaffold10x_1014_pilon-snap-gene-0.32-mRNA-1_transcript=maker-scaffold10x_1014_pilon-snap-gene-0.32-mRNA-1_gene=maker-scaffold10x_1014_pilon-snap-gene-0.32	A0A2H1BSC2|A0A2H1BSC2_FASHE_SCP_domain-containing_protein_(Fragment)_OS=Fasciola_hepatica_OX=6192_GN=D915_15566_PE=4_SV=1	A0A2H1BSC2	92.2	1.5e-34	154.5	72	80.2
maker-scaffold10x_1_pilon-augustus-gene-0.142-mRNA-1_transcript=maker-scaffold10x_1_pilon-augustus-gene-0.142-mRNA-1_gene=maker-scaffold10x_1_pilon-augustus-gene-0.142	A0A2H1BSD0|A0A2H1BSD0_FASHE_Cathepsin_B_OS=Fasciola_hepatica_OX=6192_GN=D915_011116_PE=3_SV=1	A0A2H1BSD0	100	5.4e-58	233	61.8	49.3
maker-scaffold10x_206_pilon-pred_gff_StringTie-gene-0.36-mRNA-1_transcript=maker-scaffold10x_206_pilon-pred_gff_StringTie-gene-0.36-mRNA-1_gene=maker-scaffold10x_206_pilon-pred_gff_StringTie-gene-0.36	A0A2H1BSD2|A0A2H1BSD2_FASHE_Dolichyl-diphosphooligosaccharide--protein_glycosyltransferase_subunit_DAD1_(Fragment)_OS=Fasciola_hepatica_OX=6192_GN=D915_15448_PE=3_SV=1	A0A2H1BSD2	98.5	4.9e-70	272.7	100	100
maker-scaffold10x_370_pilon-snap-gene-0.39-mRNA-1_transcript=maker-scaffold10x_370_pilon-snap-gene-0.39-mRNA-1_gene=maker-scaffold10x_370_pilon-snap-gene-0.39	A0A2H1BSD3|A0A2H1BSD3_FASHE_Ribosomal_protein_S18_OS=Fasciola_hepatica_OX=6192_GN=D915_15434_PE=4_SV=1	A0A2H1BSD3	100	5.3e-58	232.6	87.7	83.2
maker-scaffold10x_459_pilon-augustus-gene-0.14-mRNA-1_transcript=maker-scaffold10x_459_pilon-augustus-gene-0.14-mRNA-1_gene=maker-scaffold10x_459_pilon-augustus-gene-0.14	A0A2H1BSD5|A0A2H1BSD5_FASHE_dNK_domain-containing_protein_OS=Fasciola_hepatica_OX=6192_GN=D915_15437_PE=4_SV=1	A0A2H1BSD5	100	1.2e-43	184.9	71.9	85.3
maker-scaffold10x_520_pilon-snap-gene-2.155-mRNA-1_transcript=maker-scaffold10x_520_pilon-snap-gene-2.155-mRNA-1_gene=maker-scaffold10x_520_pilon-snap-gene-2.155	A0A2H1BSD9|A0A2H1BSD9_FASHE_Signal_peptidase_complex_subunit_OS=Fasciola_hepatica_OX=6192_GN=D915_011053_PE=4_SV=1	A0A2H1BSD9	100	5.6e-101	375.9	100	100
maker-scaffold10x_1319_pilon-snap-gene-0.2-mRNA-1_transcript=maker-scaffold10x_1319_pilon-snap-gene-0.2-mRNA-1_gene=maker-scaffold10x_1319_pilon-snap-gene-0.2	A0A2H1BSE5|A0A2H1BSE5_FASHE_Tyrosine-protein_phosphatase_non-receptor_type_9_OS=Fasciola_hepatica_OX=6192_GN=D915_011003_PE=4_SV=1	A0A2H1BSE5	67.7	6.6e-21	112.1	7.9	100
snap_masked-scaffold10x_481_pilon-processed-gene-0.30-mRNA-1_transcript=snap_masked-scaffold10x_481_pilon-processed-gene-0.30-mRNA-1_gene=snap_masked-scaffold10x_481_pilon-processed-gene-0.30	A0A2H1BSG0|A0A2H1BSG0_FASHE_Charged_multivesicular_body_protein_1_OS=Fasciola_hepatica_OX=6192_GN=D915_010968_PE=4_SV=1	A0A2H1BSG0	100	4.3e-88	333.2	100	100
maker-scaffold10x_13_pilon-snap-gene-2.117-mRNA-1_transcript=maker-scaffold10x_13_pilon-snap-gene-2.117-mRNA-1_gene=maker-scaffold10x_13_pilon-snap-gene-2.117	A0A2H1BSK7|A0A2H1BSK7_FASHE_Mannosyl-oligosaccharide_glucosidase_GCS1_OS=Fasciola_hepatica_OX=6192_GN=D915_011019_PE=4_SV=1	A0A2H1BSK7	99.3	8.7e-148	531.9	100	100
maker-scaffold10x_1377_pilon-pred_gff_StringTie-gene-0.18-mRNA-1_transcript=maker-scaffold10x_1377_pilon-pred_gff_StringTie-gene-0.18-mRNA-1_gene=maker-scaffold10x_1377_pilon-pred_gff_StringTie-gene-0.18	A0A2H1BSL2|A0A2H1BSL2_FASHE_Receptor_protein_serine/threonine_kinase_OS=Fasciola_hepatica_OX=6192_GN=D915_010861_PE=3_SV=1	A0A2H1BSL2	100	0	1158.3	100	98.9
augustus_masked-scaffold10x_703_pilon-processed-gene-0.16-mRNA-1_transcript=augustus_masked-scaffold10x_703_pilon-processed-gene-0.16-mRNA-1_gene=augustus_masked-scaffold10x_703_pilon-processed-gene-0.16	A0A2H1BSL7|A0A2H1BSL7_FASHE_Dorsal_switch_protein_1_OS=Fasciola_hepatica_OX=6192_GN=D915_010882_PE=4_SV=1	A0A2H1BSL7	100	8.6e-132	478.8	96.9	100
snap_masked-scaffold10x_492_pilon-processed-gene-0.0-mRNA-1_transcript=snap_masked-scaffold10x_492_pilon-processed-gene-0.0-mRNA-1_gene=snap_masked-scaffold10x_492_pilon-processed-gene-0.0	A0A2H1BSN8|A0A2H1BSN8_FASHE_ADP-ribosylation_factor_OS=Fasciola_hepatica_OX=6192_GN=D915_010784_PE=3_SV=1	A0A2H1BSN8	100	5e-101	376.7	65.4	93.9
snap_masked-scaffold10x_2356_pilon-processed-gene-0.1-mRNA-1_transcript=snap_masked-scaffold10x_2356_pilon-processed-gene-0.1-mRNA-1_gene=snap_masked-scaffold10x_2356_pilon-processed-gene-0.1	A0A2H1BSP8|A0A2H1BSP8_FASHE_Zinc_finger_CCHC_domain-containing_protein_7_OS=Fasciola_hepatica_OX=6192_GN=D915_010747_PE=4_SV=1	A0A2H1BSP8	100	9.5e-209	734.9	100	96.6
snap_masked-scaffold10x_1801_pilon-processed-gene-0.4-mRNA-1_transcript=snap_masked-scaffold10x_1801_pilon-processed-gene-0.4-mRNA-1_gene=snap_masked-scaffold10x_1801_pilon-processed-gene-0.4	A0A2H1BSQ5|A0A2H1BSQ5_FASHE_Protein_bicaudal_D_OS=Fasciola_hepatica_OX=6192_GN=D915_010786_PE=4_SV=1	A0A2H1BSQ5	95.3	1.8e-43	184.1	100	42.2
maker-scaffold10x_1373_pilon-snap-gene-0.97-mRNA-1_transcript=maker-scaffold10x_1373_pilon-snap-gene-0.97-mRNA-1_gene=maker-scaffold10x_1373_pilon-snap-gene-0.97	A0A2H1BSR0|A0A2H1BSR0_FASHE_DEAD/DEAH_box_helicase_(Fragment)_OS=Fasciola_hepatica_OX=6192_GN=D915_15150_PE=4_SV=1	A0A2H1BSR0	100	0	1646.3	92.7	99.8
maker-scaffold10x_463_pilon-snap-gene-0.24-mRNA-1_transcript=maker-scaffold10x_463_pilon-snap-gene-0.24-mRNA-1_gene=maker-scaffold10x_463_pilon-snap-gene-0.24	A0A2H1BSR4|A0A2H1BSR4_FASHE_HEAT_repeat_protein_OS=Fasciola_hepatica_OX=6192_GN=D915_15296_PE=4_SV=1	A0A2H1BSR4	99.2	0	4380.5	75.8	98.8
maker-scaffold10x_1779_pilon-augustus-gene-0.9-mRNA-1_transcript=maker-scaffold10x_1779_pilon-augustus-gene-0.9-mRNA-1_gene=maker-scaffold10x_1779_pilon-augustus-gene-0.9	A0A2H1BSR6|A0A2H1BSR6_FASHE_Bis(5'-adenosyl)-triphosphatase_enpp4_OS=Fasciola_hepatica_OX=6192_GN=D915_010687_PE=4_SV=1	A0A2H1BSR6	100	6.2e-201	709.5	63.8	100
maker-scaffold10x_357_pilon-pred_gff_StringTie-gene-0.18-mRNA-1_transcript=maker-scaffold10x_357_pilon-pred_gff_StringTie-gene-0.18-mRNA-1_gene=maker-scaffold10x_357_pilon-pred_gff_StringTie-gene-0.18	A0A2H1BSS4|A0A2H1BSS4_FASHE_Transcription_elongation_factor_1_homolog_OS=Fasciola_hepatica_OX=6192_GN=D915_010831_PE=3_SV=1	A0A2H1BSS4	100	8e-18	97.8	86.3	53
maker-scaffold10x_75_pilon-snap-gene-0.110-mRNA-1_transcript=maker-scaffold10x_75_pilon-snap-gene-0.110-mRNA-1_gene=maker-scaffold10x_75_pilon-snap-gene-0.110	A0A2H1BSU2|A0A2H1BSU2_FASHE_CS_domain_protein_OS=Fasciola_hepatica_OX=6192_GN=D915_010779_PE=4_SV=1	A0A2H1BSU2	100	1.9e-99	370.9	100	100
maker-scaffold10x_749_pilon-augustus-gene-0.0-mRNA-1_transcript=maker-scaffold10x_749_pilon-augustus-gene-0.0-mRNA-1_gene=maker-scaffold10x_749_pilon-augustus-gene-0.0	A0A2H1BSW6|A0A2H1BSW6_FASHE_DUF3421_domain-containing_protein_OS=Fasciola_hepatica_OX=6192_GN=D915_010606_PE=4_SV=1	A0A2H1BSW6	98.7	8.2e-85	322	97.5	100
maker-scaffold10x_749_pilon-snap-gene-0.129-mRNA-1_transcript=maker-scaffold10x_749_pilon-snap-gene-0.129-mRNA-1_gene=maker-scaffold10x_749_pilon-snap-gene-0.129	A0A2H1BSW6|A0A2H1BSW6_FASHE_DUF3421_domain-containing_protein_OS=Fasciola_hepatica_OX=6192_GN=D915_010606_PE=4_SV=1	A0A2H1BSW6	84.8	1.5e-51	211.1	97.5	80.6
maker-scaffold10x_1977_pilon-snap-gene-0.1-mRNA-1_transcript=maker-scaffold10x_1977_pilon-snap-gene-0.1-mRNA-1_gene=maker-scaffold10x_1977_pilon-snap-gene-0.1	A0A2H1BSX5|A0A2H1BSX5_FASHE_AP_complex_subunit_sigma_OS=Fasciola_hepatica_OX=6192_GN=D915_010649_PE=3_SV=1	A0A2H1BSX5	100	7.1e-81	308.9	100	100
maker-scaffold10x_147_pilon-augustus-gene-0.71-mRNA-1_transcript=maker-scaffold10x_147_pilon-augustus-gene-0.71-mRNA-1_gene=maker-scaffold10x_147_pilon-augustus-gene-0.71	A0A2H1BSZ7|A0A2H1BSZ7_FASHE_PCI_domain_protein_(Fragment)_OS=Fasciola_hepatica_OX=6192_GN=D915_15026_PE=4_SV=1	A0A2H1BSZ7	100	7.2e-153	548.9	100	87.1
maker-scaffold10x_304_pilon-snap-gene-0.11-mRNA-1_transcript=maker-scaffold10x_304_pilon-snap-gene-0.11-mRNA-1_gene=maker-scaffold10x_304_pilon-snap-gene-0.11	A0A2H1BT07|A0A2H1BT07_FASHE_GDT1_family_protein_OS=Fasciola_hepatica_OX=6192_GN=D915_15033_PE=3_SV=1	A0A2H1BT07	100	6.4e-115	422.9	73	86.6
maker-scaffold10x_61_pilon-snap-gene-0.52-mRNA-1_transcript=maker-scaffold10x_61_pilon-snap-gene-0.52-mRNA-1_gene=maker-scaffold10x_61_pilon-snap-gene-0.52	A0A2H1BT11|A0A2H1BT11_FASHE_Tubulin-tyrosine_ligase_family_protein_OS=Fasciola_hepatica_OX=6192_GN=D915_010617_PE=4_SV=1	A0A2H1BT11	100	6.4e-257	895.2	100	100
maker-scaffold10x_1149_pilon-snap-gene-0.11-mRNA-1_transcript=maker-scaffold10x_1149_pilon-snap-gene-0.11-mRNA-1_gene=maker-scaffold10x_1149_pilon-snap-gene-0.11	A0A2H1BT13|A0A2H1BT13_FASHE_Sulfhydryl_oxidase_OS=Fasciola_hepatica_OX=6192_GN=D915_010582_PE=4_SV=1	A0A2H1BT13	99.4	3.3e-100	373.2	100	100
maker-scaffold10x_101_pilon-snap-gene-0.5-mRNA-1_transcript=maker-scaffold10x_101_pilon-snap-gene-0.5-mRNA-1_gene=maker-scaffold10x_101_pilon-snap-gene-0.5	A0A2H1BT31|A0A2H1BT31_FASHE_RNA-binding_motif_protein_X-linked_OS=Fasciola_hepatica_OX=6192_GN=D915_010580_PE=4_SV=1	A0A2H1BT31	98.7	3.2e-167	597.8	59.2	87.9
maker-scaffold10x_749_pilon-snap-gene-0.135-mRNA-1_transcript=maker-scaffold10x_749_pilon-snap-gene-0.135-mRNA-1_gene=maker-scaffold10x_749_pilon-snap-gene-0.135	A0A2H1BT48|A0A2H1BT48_FASHE_7_transmembrane_receptor_OS=Fasciola_hepatica_OX=6192_GN=D915_15038_PE=4_SV=1	A0A2H1BT48	95.5	1.4e-137	498	100	69.4
maker-scaffold10x_2153_pilon-snap-gene-0.1-mRNA-1_transcript=maker-scaffold10x_2153_pilon-snap-gene-0.1-mRNA-1_gene=maker-scaffold10x_2153_pilon-snap-gene-0.1	A0A2H1BT57|A0A2H1BT57_FASHE_Hexosyltransferase_OS=Fasciola_hepatica_OX=6192_GN=D915_010445_PE=3_SV=1	A0A2H1BT57	97.9	5.8e-134	486.9	50.4	98.4
maker-scaffold10x_40_pilon-augustus-gene-0.31-mRNA-1_transcript=maker-scaffold10x_40_pilon-augustus-gene-0.31-mRNA-1_gene=maker-scaffold10x_40_pilon-augustus-gene-0.31	A0A2H1BT75|A0A2H1BT75_FASHE_HMA_domain-containing_protein_OS=Fasciola_hepatica_OX=6192_GN=D915_14937_PE=4_SV=1	A0A2H1BT75	100	3.3e-156	560.1	99	97.3
maker-scaffold10x_445_pilon-snap-gene-0.27-mRNA-1_transcript=maker-scaffold10x_445_pilon-snap-gene-0.27-mRNA-1_gene=maker-scaffold10x_445_pilon-snap-gene-0.27	A0A2H1BT76|A0A2H1BT76_FASHE_Zinc_finger,_C2H2_type_OS=Fasciola_hepatica_OX=6192_GN=D915_14925_PE=4_SV=1	A0A2H1BT76	92.6	5.3e-153	549.3	100	100
maker-scaffold10x_201_pilon-augustus-gene-0.24-mRNA-1_transcript=maker-scaffold10x_201_pilon-augustus-gene-0.24-mRNA-1_gene=maker-scaffold10x_201_pilon-augustus-gene-0.24	A0A2H1BT90|A0A2H1BT90_FASHE_HAD_hydrolase,_family_IA,_variant_3_OS=Fasciola_hepatica_OX=6192_GN=D915_010443_PE=4_SV=1	A0A2H1BT90	99.6	6.5e-131	475.7	100	100
maker-scaffold10x_592_pilon-snap-gene-0.24-mRNA-1_transcript=maker-scaffold10x_592_pilon-snap-gene-0.24-mRNA-1_gene=maker-scaffold10x_592_pilon-snap-gene-0.24	A0A2H1BTA4|A0A2H1BTA4_FASHE_Large_subunit_ribosomal_protein_L17e_OS=Fasciola_hepatica_OX=6192_GN=D915_010435_PE=3_SV=1	A0A2H1BTA4	100	3.5e-106	393.3	100	100
maker-scaffold10x_45_pilon-snap-gene-0.52-mRNA-1_transcript=maker-scaffold10x_45_pilon-snap-gene-0.52-mRNA-1_gene=maker-scaffold10x_45_pilon-snap-gene-0.52	A0A2H1BTA8|A0A2H1BTA8_FASHE_RRM_domain-containing_protein_OS=Fasciola_hepatica_OX=6192_GN=D915_14875_PE=4_SV=1	A0A2H1BTA8	100	9.5e-78	298.5	98.1	93.9
maker-scaffold10x_314_pilon-snap-gene-0.1-mRNA-1_transcript=maker-scaffold10x_314_pilon-snap-gene-0.1-mRNA-1_gene=maker-scaffold10x_314_pilon-snap-gene-0.1	A0A2H1BTB9|A0A2H1BTB9_FASHE_SAM-dependent_MTase_TRM10-type_domain-containing_protein_OS=Fasciola_hepatica_OX=6192_GN=D915_14898_PE=4_SV=1	A0A2H1BTB9	100	5.6e-33	148.7	100	100
maker-scaffold10x_1885_pilon-snap-gene-0.18-mRNA-1_transcript=maker-scaffold10x_1885_pilon-snap-gene-0.18-mRNA-1_gene=maker-scaffold10x_1885_pilon-snap-gene-0.18	A0A2H1BTF1|A0A2H1BTF1_FASHE_Ribosomal_S10_domain-containing_protein_OS=Fasciola_hepatica_OX=6192_GN=D915_14839_PE=4_SV=1	A0A2H1BTF1	100	1.1e-69	271.6	100	69.3
maker-scaffold10x_39_pilon-snap-gene-0.7-mRNA-1_transcript=maker-scaffold10x_39_pilon-snap-gene-0.7-mRNA-1_gene=maker-scaffold10x_39_pilon-snap-gene-0.7	A0A2H1BTF2|A0A2H1BTF2_FASHE_UBA/TS-N_domain_protein_(Fragment)_OS=Fasciola_hepatica_OX=6192_GN=D915_15854_PE=4_SV=1	A0A2H1BTF2	91.4	2e-120	441.8	53.5	41.3
maker-scaffold10x_75_pilon-snap-gene-0.121-mRNA-1_transcript=maker-scaffold10x_75_pilon-snap-gene-0.121-mRNA-1_gene=maker-scaffold10x_75_pilon-snap-gene-0.121	A0A2H1BTF2|A0A2H1BTF2_FASHE_UBA/TS-N_domain_protein_(Fragment)_OS=Fasciola_hepatica_OX=6192_GN=D915_15854_PE=4_SV=1	A0A2H1BTF2	78.8	4e-269	936.8	69.6	92
maker-scaffold10x_1639_pilon-augustus-gene-0.46-mRNA-1_transcript=maker-scaffold10x_1639_pilon-augustus-gene-0.46-mRNA-1_gene=maker-scaffold10x_1639_pilon-augustus-gene-0.46	A0A2H1BTF5|A0A2H1BTF5_FASHE_UBX_domain_protein_OS=Fasciola_hepatica_OX=6192_GN=D915_14939_PE=4_SV=1	A0A2H1BTF5	96.3	7e-106	392.5	95.6	88.7
maker-scaffold10x_37_pilon-snap-gene-0.16-mRNA-1_transcript=maker-scaffold10x_37_pilon-snap-gene-0.16-mRNA-1_gene=maker-scaffold10x_37_pilon-snap-gene-0.16	A0A2H1BTH2|A0A2H1BTH2_FASHE_Helix-loop-helix_DNA-binding_domain_protein_OS=Fasciola_hepatica_OX=6192_GN=D915_010297_PE=4_SV=1	A0A2H1BTH2	99.7	3.4e-164	586.6	100	100
maker-scaffold10x_15_pilon-snap-gene-0.21-mRNA-1_transcript=maker-scaffold10x_15_pilon-snap-gene-0.21-mRNA-1_gene=maker-scaffold10x_15_pilon-snap-gene-0.21	A0A2H1BTH7|A0A2H1BTH7_FASHE_Ribosomal_L18p/L5e_family_protein_OS=Fasciola_hepatica_OX=6192_GN=D915_010416_PE=3_SV=1	A0A2H1BTH7	100	5.2e-165	589.3	100	100
maker-scaffold10x_99_pilon-augustus-gene-0.111-mRNA-1_transcript=maker-scaffold10x_99_pilon-augustus-gene-0.111-mRNA-1_gene=maker-scaffold10x_99_pilon-augustus-gene-0.111	A0A2H1BTI2|A0A2H1BTI2_FASHE_Putative_Kae1-associated_kinase_Bud32_OS=Fasciola_hepatica_OX=6192_GN=D915_14786_PE=4_SV=1	A0A2H1BTI2	77.4	7.7e-136	492.7	100	100
snap_masked-scaffold10x_637_pilon-processed-gene-0.189-mRNA-1_transcript=snap_masked-scaffold10x_637_pilon-processed-gene-0.189-mRNA-1_gene=snap_masked-scaffold10x_637_pilon-processed-gene-0.189	A0A2H1BTK1|A0A2H1BTK1_FASHE_Kinesin_motor_domain_protein_OS=Fasciola_hepatica_OX=6192_GN=D915_010303_PE=3_SV=1	A0A2H1BTK1	99.6	0	2360.5	100	100
maker-scaffold10x_436_pilon-snap-gene-0.37-mRNA-1_transcript=maker-scaffold10x_436_pilon-snap-gene-0.37-mRNA-1_gene=maker-scaffold10x_436_pilon-snap-gene-0.37	A0A2H1BTK4|A0A2H1BTK4_FASHE_ATP_synthase_subunit_OS=Fasciola_hepatica_OX=6192_GN=D915_010253_PE=3_SV=1	A0A2H1BTK4	100	6.2e-52	212.2	100	100
maker-scaffold10x_2113_pilon-snap-gene-0.17-mRNA-1_transcript=maker-scaffold10x_2113_pilon-snap-gene-0.17-mRNA-1_gene=maker-scaffold10x_2113_pilon-snap-gene-0.17	A0A2H1BTK5|A0A2H1BTK5_FASHE_40S_ribosomal_protein_S30_OS=Fasciola_hepatica_OX=6192_GN=D915_010261_PE=3_SV=1	A0A2H1BTK5	100	2e-68	267.3	100	100
snap_masked-scaffold10x_469_pilon-processed-gene-0.17-mRNA-1_transcript=snap_masked-scaffold10x_469_pilon-processed-gene-0.17-mRNA-1_gene=snap_masked-scaffold10x_469_pilon-processed-gene-0.17	A0A2H1BTL5|A0A2H1BTL5_FASHE_Sybindin-like_family_protein_(Fragment)_OS=Fasciola_hepatica_OX=6192_GN=D915_14815_PE=4_SV=1	A0A2H1BTL5	56.3	4.6e-24	120.2	48.1	44.6
maker-scaffold10x_936_pilon-snap-gene-0.62-mRNA-1_transcript=maker-scaffold10x_936_pilon-snap-gene-0.62-mRNA-1_gene=maker-scaffold10x_936_pilon-snap-gene-0.62	A0A2H1BTN5|A0A2H1BTN5_FASHE_MH1_domain_protein_OS=Fasciola_hepatica_OX=6192_GN=D915_14718_PE=4_SV=1	A0A2H1BTN5	89.9	1.5e-43	186.4	24.5	56.5
maker-scaffold10x_377_pilon-snap-gene-0.57-mRNA-1_transcript=maker-scaffold10x_377_pilon-snap-gene-0.57-mRNA-1_gene=maker-scaffold10x_377_pilon-snap-gene-0.57	A0A2H1BTS2|A0A2H1BTS2_FASHE_Pre-mRNA-splicing_factor_CWC25_OS=Fasciola_hepatica_OX=6192_GN=D915_010256_PE=4_SV=1	A0A2H1BTS2	100	5.2e-133	483	90.3	100
maker-scaffold10x_966_pilon-snap-gene-0.75-mRNA-1_transcript=maker-scaffold10x_966_pilon-snap-gene-0.75-mRNA-1_gene=maker-scaffold10x_966_pilon-snap-gene-0.75	A0A2H1BTS7|A0A2H1BTS7_FASHE_Peptidylprolyl_isomerase_OS=Fasciola_hepatica_OX=6192_GN=D915_010170_PE=4_SV=1	A0A2H1BTS7	97.5	3.4e-239	836.3	100	100
maker-scaffold10x_720_pilon-augustus-gene-0.108-mRNA-1_transcript=maker-scaffold10x_720_pilon-augustus-gene-0.108-mRNA-1_gene=maker-scaffold10x_720_pilon-augustus-gene-0.108	A0A2H1BTV4|A0A2H1BTV4_FASHE_Rho_GTPase-activating_protein_19_OS=Fasciola_hepatica_OX=6192_GN=D915_010128_PE=4_SV=1	A0A2H1BTV4	98.8	0	1811.6	100	100
maker-scaffold10x_239_pilon-snap-gene-0.2-mRNA-1_transcript=maker-scaffold10x_239_pilon-snap-gene-0.2-mRNA-1_gene=maker-scaffold10x_239_pilon-snap-gene-0.2	A0A2H1BTW1|A0A2H1BTW1_FASHE_Prefoldin_subunit_OS=Fasciola_hepatica_OX=6192_GN=D915_14634_PE=4_SV=1	A0A2H1BTW1	100	4.2e-57	229.6	100	100
maker-scaffold10x_2114_pilon-augustus-gene-0.5-mRNA-1_transcript=maker-scaffold10x_2114_pilon-augustus-gene-0.5-mRNA-1_gene=maker-scaffold10x_2114_pilon-augustus-gene-0.5	A0A2H1BTX4|A0A2H1BTX4_FASHE_t-SNARE_coiled-coil_homology_domain-containing_protein_(Fragment)_OS=Fasciola_hepatica_OX=6192_GN=D915_15756_PE=4_SV=1	A0A2H1BTX4	100	9.3e-126	459.1	66.5	72.6
maker-scaffold10x_377_pilon-augustus-gene-0.1-mRNA-1_transcript=maker-scaffold10x_377_pilon-augustus-gene-0.1-mRNA-1_gene=maker-scaffold10x_377_pilon-augustus-gene-0.1	A0A2H1BTY7|A0A2H1BTY7_FASHE_Glypican_OS=Fasciola_hepatica_OX=6192_GN=D915_14676_PE=3_SV=1	A0A2H1BTY7	99.7	1.2e-172	614.8	99	68.6
maker-scaffold10x_377_pilon-augustus-gene-0.2-mRNA-1_transcript=maker-scaffold10x_377_pilon-augustus-gene-0.2-mRNA-1_gene=maker-scaffold10x_377_pilon-augustus-gene-0.2	A0A2H1BTY7|A0A2H1BTY7_FASHE_Glypican_OS=Fasciola_hepatica_OX=6192_GN=D915_14676_PE=3_SV=1	A0A2H1BTY7	100	9.5e-59	235	100	26.4
maker-scaffold10x_802_pilon-pred_gff_StringTie-gene-0.57-mRNA-1_transcript=maker-scaffold10x_802_pilon-pred_gff_StringTie-gene-0.57-mRNA-1_gene=maker-scaffold10x_802_pilon-pred_gff_StringTie-gene-0.57	A0A2H1BTY8|A0A2H1BTY8_FASHE_RNase_P_subunit_p30_OS=Fasciola_hepatica_OX=6192_GN=D915_010152_PE=4_SV=1	A0A2H1BTY8	100	1.4e-179	637.9	100	100
maker-scaffold10x_2199_pilon-pred_gff_StringTie-gene-0.41-mRNA-1_transcript=maker-scaffold10x_2199_pilon-pred_gff_StringTie-gene-0.41-mRNA-1_gene=maker-scaffold10x_2199_pilon-pred_gff_StringTie-gene-0.41	A0A2H1BTZ2|A0A2H1BTZ2_FASHE_Putative_phosphoglycerate_dehydrogenase_OS=Fasciola_hepatica_OX=6192_GN=D915_14604_PE=4_SV=1	A0A2H1BTZ2	99.8	0	1093.6	100	100
maker-scaffold10x_13_pilon-snap-gene-2.140-mRNA-1_transcript=maker-scaffold10x_13_pilon-snap-gene-2.140-mRNA-1_gene=maker-scaffold10x_13_pilon-snap-gene-2.140	A0A2H1BTZ4|A0A2H1BTZ4_FASHE_Estrone_sulfotransferase_OS=Fasciola_hepatica_OX=6192_GN=D915_009705_PE=4_SV=1	A0A2H1BTZ4	89.7	1.2e-177	631.3	100	92.8
maker-scaffold10x_68_pilon-snap-gene-0.23-mRNA-1_transcript=maker-scaffold10x_68_pilon-snap-gene-0.23-mRNA-1_gene=maker-scaffold10x_68_pilon-snap-gene-0.23	A0A2H1BTZ6|A0A2H1BTZ6_FASHE_Zinc_finger,_C2H2_type_OS=Fasciola_hepatica_OX=6192_GN=D915_14669_PE=4_SV=1	A0A2H1BTZ6	76.5	0	1351.7	50.6	98.2
maker-scaffold10x_2199_pilon-snap-gene-0.15-mRNA-1_transcript=maker-scaffold10x_2199_pilon-snap-gene-0.15-mRNA-1_gene=maker-scaffold10x_2199_pilon-snap-gene-0.15	A0A2H1BTZ8|A0A2H1BTZ8_FASHE_Signal_peptidase_complex_subunit_OS=Fasciola_hepatica_OX=6192_GN=D915_010145_PE=4_SV=1	A0A2H1BTZ8	100	1e-51	211.5	100	100
maker-scaffold10x_98_pilon-snap-gene-0.10-mRNA-1_transcript=maker-scaffold10x_98_pilon-snap-gene-0.10-mRNA-1_gene=maker-scaffold10x_98_pilon-snap-gene-0.10	A0A2H1BU07|A0A2H1BU07_FASHE_Potassium_voltage-gated_channel_subfamily_H_member_8_OS=Fasciola_hepatica_OX=6192_GN=D915_009736_PE=4_SV=1	A0A2H1BU07	79.9	1.6e-54	221.5	86	45.4
maker-scaffold10x_242_pilon-snap-gene-0.20-mRNA-1_transcript=maker-scaffold10x_242_pilon-snap-gene-0.20-mRNA-1_gene=maker-scaffold10x_242_pilon-snap-gene-0.20	A0A2H1BU21|A0A2H1BU21_FASHE_PRKR-interacting_protein_1_OS=Fasciola_hepatica_OX=6192_GN=D915_010155_PE=4_SV=1	A0A2H1BU21	99.3	7.9e-72	278.9	86.1	75.1
maker-scaffold10x_685_pilon-snap-gene-0.20-mRNA-1_transcript=maker-scaffold10x_685_pilon-snap-gene-0.20-mRNA-1_gene=maker-scaffold10x_685_pilon-snap-gene-0.20	A0A2H1BU45|A0A2H1BU45_FASHE_Integrase_H2C2_domain-containing_protein_(Fragment)_OS=Fasciola_hepatica_OX=6192_GN=D915_15564_PE=4_SV=1	A0A2H1BU45	87.3	1.8e-14	88.2	38.5	39.9
maker-scaffold10x_773_pilon-snap-gene-0.72-mRNA-1_transcript=maker-scaffold10x_773_pilon-snap-gene-0.72-mRNA-1_gene=maker-scaffold10x_773_pilon-snap-gene-0.72	A0A2H1BU46|A0A2H1BU46_FASHE_Synaptobrevin_(Fragment)_OS=Fasciola_hepatica_OX=6192_GN=D915_14646_PE=4_SV=1	A0A2H1BU46	97.7	4e-39	169.9	72.7	82.2
maker-scaffold10x_909_pilon-snap-gene-0.32-mRNA-1_transcript=maker-scaffold10x_909_pilon-snap-gene-0.32-mRNA-1_gene=maker-scaffold10x_909_pilon-snap-gene-0.32	A0A2H1BU48|A0A2H1BU48_FASHE_39S_ribosomal_protein_L49_mitochondrial_OS=Fasciola_hepatica_OX=6192_GN=D915_010075_PE=4_SV=1	A0A2H1BU48	96.1	1.1e-110	408.3	99	99
maker-scaffold10x_45_pilon-snap-gene-0.39-mRNA-1_transcript=maker-scaffold10x_45_pilon-snap-gene-0.39-mRNA-1_gene=maker-scaffold10x_45_pilon-snap-gene-0.39	A0A2H1BU75|A0A2H1BU75_FASHE_Proliferating_cell_nuclear_antigen_OS=Fasciola_hepatica_OX=6192_GN=D915_011058_PE=3_SV=1	A0A2H1BU75	100	4.5e-141	509.6	100	100
maker-scaffold10x_2113_pilon-augustus-gene-0.4-mRNA-1_transcript=maker-scaffold10x_2113_pilon-augustus-gene-0.4-mRNA-1_gene=maker-scaffold10x_2113_pilon-augustus-gene-0.4	A0A2H1BU76|A0A2H1BU76_FASHE_FAD_binding_domain_protein_(Fragment)_OS=Fasciola_hepatica_OX=6192_GN=D915_14615_PE=4_SV=1	A0A2H1BU76	99.7	1.1e-181	644.8	100	66.8
maker-scaffold10x_749_pilon-snap-gene-0.127-mRNA-1_transcript=maker-scaffold10x_749_pilon-snap-gene-0.127-mRNA-1_gene=maker-scaffold10x_749_pilon-snap-gene-0.127	A0A2H1BU81|A0A2H1BU81_FASHE_7_transmembrane_receptor_OS=Fasciola_hepatica_OX=6192_GN=D915_14531_PE=4_SV=1	A0A2H1BU81	80.7	1.9e-84	323.2	24.6	40.2
maker-scaffold10x_559_pilon-snap-gene-0.25-mRNA-1_transcript=maker-scaffold10x_559_pilon-snap-gene-0.25-mRNA-1_gene=maker-scaffold10x_559_pilon-snap-gene-0.25	A0A2H1BU85|A0A2H1BU85_FASHE_Zinc_finger,_C3HC4_type_OS=Fasciola_hepatica_OX=6192_GN=D915_14485_PE=4_SV=1	A0A2H1BU85	99.7	1.8e-210	740.7	95.3	100
maker-scaffold10x_1557_pilon-snap-gene-0.5-mRNA-1_transcript=maker-scaffold10x_1557_pilon-snap-gene-0.5-mRNA-1_gene=maker-scaffold10x_1557_pilon-snap-gene-0.5	A0A2H1BU86|A0A2H1BU86_FASHE_SCP_domain-containing_protein_OS=Fasciola_hepatica_OX=6192_GN=D915_009763_PE=4_SV=1	A0A2H1BU86	92.5	5.7e-27	129	75.3	100
maker-scaffold10x_513_pilon-snap-gene-0.57-mRNA-1_transcript=maker-scaffold10x_513_pilon-snap-gene-0.57-mRNA-1_gene=maker-scaffold10x_513_pilon-snap-gene-0.57	A0A2H1BU86|A0A2H1BU86_FASHE_SCP_domain-containing_protein_OS=Fasciola_hepatica_OX=6192_GN=D915_009763_PE=4_SV=1	A0A2H1BU86	100	1.6e-29	137.5	75.3	100
maker-scaffold10x_99_pilon-snap-gene-0.93-mRNA-1_transcript=maker-scaffold10x_99_pilon-snap-gene-0.93-mRNA-1_gene=maker-scaffold10x_99_pilon-snap-gene-0.93	A0A2H1BUB8|A0A2H1BUB8_FASHE_ADP-ribosylation_factor_OS=Fasciola_hepatica_OX=6192_GN=D915_010866_PE=3_SV=1	A0A2H1BUB8	100	5.6e-98	365.9	100	100
maker-scaffold10x_2067_pilon-augustus-gene-0.8-mRNA-1_transcript=maker-scaffold10x_2067_pilon-augustus-gene-0.8-mRNA-1_gene=maker-scaffold10x_2067_pilon-augustus-gene-0.8	A0A2H1BUC8|A0A2H1BUC8_FASHE_Ankyrin_repeat_protein_OS=Fasciola_hepatica_OX=6192_GN=D915_14499_PE=4_SV=1	A0A2H1BUC8	99.3	5.2e-57	229.9	70.1	63.3
maker-scaffold10x_166_pilon-snap-gene-0.46-mRNA-1_transcript=maker-scaffold10x_166_pilon-snap-gene-0.46-mRNA-1_gene=maker-scaffold10x_166_pilon-snap-gene-0.46	A0A2H1BUD2|A0A2H1BUD2_FASHE_V-type_proton_ATPase_proteolipid_subunit_OS=Fasciola_hepatica_OX=6192_GN=D915_14427_PE=3_SV=1	A0A2H1BUD2	100	7e-70	272.3	100	100
maker-scaffold10x_2607_pilon-snap-gene-0.0-mRNA-1_transcript=maker-scaffold10x_2607_pilon-snap-gene-0.0-mRNA-1_gene=maker-scaffold10x_2607_pilon-snap-gene-0.0	A0A2H1BUE2|A0A2H1BUE2_FASHE_HnRNP-L/PTB/hephaestus_splicing_factor_family_protein_OS=Fasciola_hepatica_OX=6192_GN=D915_14537_PE=4_SV=1	A0A2H1BUE2	87.9	0	1106.3	95.9	100
maker-scaffold10x_919_pilon-snap-gene-0.112-mRNA-1_transcript=maker-scaffold10x_919_pilon-snap-gene-0.112-mRNA-1_gene=maker-scaffold10x_919_pilon-snap-gene-0.112	A0A2H1BUE4|A0A2H1BUE4_FASHE_Eukaryotic_initiation_factor_1A_OS=Fasciola_hepatica_OX=6192_GN=D915_14463_PE=4_SV=1	A0A2H1BUE4	100	3.8e-51	209.5	100	100
maker-scaffold10x_77_pilon-snap-gene-0.24-mRNA-1_transcript=maker-scaffold10x_77_pilon-snap-gene-0.24-mRNA-1_gene=maker-scaffold10x_77_pilon-snap-gene-0.24	A0A2H1BUF2|A0A2H1BUF2_FASHE_Sjogren'S_syndrome/scleroderma_autoantigen_1_OS=Fasciola_hepatica_OX=6192_GN=D915_010033_PE=4_SV=1	A0A2H1BUF2	100	3.8e-100	373.2	100	100
maker-scaffold10x_2082_pilon-snap-gene-0.3-mRNA-1_transcript=maker-scaffold10x_2082_pilon-snap-gene-0.3-mRNA-1_gene=maker-scaffold10x_2082_pilon-snap-gene-0.3	A0A2H1BUG7|A0A2H1BUG7_FASHE_Galactose-1-phosphate_uridyl_transferase_protein_(Fragment)_OS=Fasciola_hepatica_OX=6192_GN=D915_15410_PE=4_SV=1	A0A2H1BUG7	100	7.5e-111	409.8	47.1	90
maker-scaffold10x_275_pilon-snap-gene-0.19-mRNA-1_transcript=maker-scaffold10x_275_pilon-snap-gene-0.19-mRNA-1_gene=maker-scaffold10x_275_pilon-snap-gene-0.19	A0A2H1BUM6|A0A2H1BUM6_FASHE_Eukaryotic_translation_initiation_factor_3_subunit_G_OS=Fasciola_hepatica_OX=6192_GN=D915_010752_PE=3_SV=1	A0A2H1BUM6	100	3.4e-158	566.6	98.6	94.3
snap_masked-scaffold10x_1801_pilon-processed-gene-0.2-mRNA-1_transcript=snap_masked-scaffold10x_1801_pilon-processed-gene-0.2-mRNA-1_gene=snap_masked-scaffold10x_1801_pilon-processed-gene-0.2	A0A2H1BUN5|A0A2H1BUN5_FASHE_Bicaudal_D_protein_OS=Fasciola_hepatica_OX=6192_GN=D915_010787_PE=4_SV=1	A0A2H1BUN5	97.2	1.4e-88	334.7	94.7	67.3
maker-scaffold10x_2525_pilon-snap-gene-0.6-mRNA-1_transcript=maker-scaffold10x_2525_pilon-snap-gene-0.6-mRNA-1_gene=maker-scaffold10x_2525_pilon-snap-gene-0.6	A0A2H1BUN9|A0A2H1BUN9_FASHE_Krueppel_factor_1_OS=Fasciola_hepatica_OX=6192_GN=D915_009765_PE=4_SV=1	A0A2H1BUN9	90.1	1.5e-77	298.1	100	83.5
maker-scaffold10x_1010_pilon-snap-gene-0.105-mRNA-1_transcript=maker-scaffold10x_1010_pilon-snap-gene-0.105-mRNA-1_gene=maker-scaffold10x_1010_pilon-snap-gene-0.105	A0A2H1BUR4|A0A2H1BUR4_FASHE_DNA_mismatch_repair_protein_MLH3_OS=Fasciola_hepatica_OX=6192_GN=D915_009754_PE=4_SV=1	A0A2H1BUR4	99.6	3.3e-144	520	100	100
maker-scaffold10x_966_pilon-snap-gene-0.85-mRNA-1_transcript=maker-scaffold10x_966_pilon-snap-gene-0.85-mRNA-1_gene=maker-scaffold10x_966_pilon-snap-gene-0.85	A0A2H1BUR7|A0A2H1BUR7_FASHE_rRNA_2'-O-methyltransferase_fibrillarin_OS=Fasciola_hepatica_OX=6192_GN=D915_15167_PE=3_SV=1	A0A2H1BUR7	97.5	4.7e-148	533.1	100	97
maker-scaffold10x_119_pilon-snap-gene-0.3-mRNA-1_transcript=maker-scaffold10x_119_pilon-snap-gene-0.3-mRNA-1_gene=maker-scaffold10x_119_pilon-snap-gene-0.3	A0A2H1BUT0|A0A2H1BUT0_FASHE_Ribonucleoside-diphosphate_reductase_small_subunit_OS=Fasciola_hepatica_OX=6192_GN=D915_009802_PE=4_SV=1	A0A2H1BUT0	99.4	3.9e-203	717.2	49.7	94.9
maker-scaffold10x_93_pilon-snap-gene-0.124-mRNA-1_transcript=maker-scaffold10x_93_pilon-snap-gene-0.124-mRNA-1_gene=maker-scaffold10x_93_pilon-snap-gene-0.124	A0A2H1BUT1|A0A2H1BUT1_FASHE_Transformer-2_protein_like_protein_alpha_OS=Fasciola_hepatica_OX=6192_GN=D915_010730_PE=4_SV=1	A0A2H1BUT1	100	1.5e-167	597.8	100	100
maker-scaffold10x_577_pilon-snap-gene-0.0-mRNA-1_transcript=maker-scaffold10x_577_pilon-snap-gene-0.0-mRNA-1_gene=maker-scaffold10x_577_pilon-snap-gene-0.0	A0A2H1BUV8|A0A2H1BUV8_FASHE_FF_domain_protein_OS=Fasciola_hepatica_OX=6192_GN=D915_14353_PE=4_SV=1	A0A2H1BUV8	97.6	0	1954.5	100	100
maker-scaffold10x_318_pilon-snap-gene-0.85-mRNA-1_transcript=maker-scaffold10x_318_pilon-snap-gene-0.85-mRNA-1_gene=maker-scaffold10x_318_pilon-snap-gene-0.85	A0A2H1BUW1|A0A2H1BUW1_FASHE_Calmodulin_OS=Fasciola_hepatica_OX=6192_GN=D915_009762_PE=4_SV=1	A0A2H1BUW1	100	1.3e-82	314.7	100	100
maker-scaffold10x_65_pilon-snap-gene-0.3-mRNA-1_transcript=maker-scaffold10x_65_pilon-snap-gene-0.3-mRNA-1_gene=maker-scaffold10x_65_pilon-snap-gene-0.3	A0A2H1BUW8|A0A2H1BUW8_FASHE_Spectrin_repeat-containing_domain_protein_OS=Fasciola_hepatica_OX=6192_GN=D915_14255_PE=4_SV=1	A0A2H1BUW8	38.2	5.7e-36	161	75	25.3
maker-scaffold10x_226_pilon-snap-gene-0.82-mRNA-1_transcript=maker-scaffold10x_226_pilon-snap-gene-0.82-mRNA-1_gene=maker-scaffold10x_226_pilon-snap-gene-0.82	A0A2H1BUX1|A0A2H1BUX1_FASHE_Nucleosome_assembly_protein_OS=Fasciola_hepatica_OX=6192_GN=D915_14240_PE=3_SV=1	A0A2H1BUX1	96.9	3e-192	680.2	86.5	86.1
maker-scaffold10x_370_pilon-snap-gene-0.44-mRNA-1_transcript=maker-scaffold10x_370_pilon-snap-gene-0.44-mRNA-1_gene=maker-scaffold10x_370_pilon-snap-gene-0.44	A0A2H1BUZ7|A0A2H1BUZ7_FASHE_Magnesium_transporter_protein_1_family_protein_OS=Fasciola_hepatica_OX=6192_GN=D915_14230_PE=4_SV=1	A0A2H1BUZ7	99.6	1.7e-143	517.7	98.9	95.3
maker-scaffold10x_548_pilon-snap-gene-0.17-mRNA-1_transcript=maker-scaffold10x_548_pilon-snap-gene-0.17-mRNA-1_gene=maker-scaffold10x_548_pilon-snap-gene-0.17	A0A2H1BV01|A0A2H1BV01_FASHE_Peptidylprolyl_isomerase_OS=Fasciola_hepatica_OX=6192_GN=D915_009749_PE=4_SV=1	A0A2H1BV01	100	3.8e-57	229.6	100	100
maker-scaffold10x_2086_pilon-snap-gene-0.17-mRNA-1_transcript=maker-scaffold10x_2086_pilon-snap-gene-0.17-mRNA-1_gene=maker-scaffold10x_2086_pilon-snap-gene-0.17	A0A2H1BV06|A0A2H1BV06_FASHE_Triple_functional_domain_protein_OS=Fasciola_hepatica_OX=6192_GN=D915_010105_PE=4_SV=1	A0A2H1BV06	99	3e-87	330.5	99	45
maker-scaffold10x_53_pilon-snap-gene-0.50-mRNA-1_transcript=maker-scaffold10x_53_pilon-snap-gene-0.50-mRNA-1_gene=maker-scaffold10x_53_pilon-snap-gene-0.50	A0A2H1BV09|A0A2H1BV09_FASHE_Oxidoreductase,_short_chain_dehydrogenase/reductase_family_protein_OS=Fasciola_hepatica_OX=6192_GN=D915_15041_PE=4_SV=1	A0A2H1BV09	99.6	2.2e-122	447.6	83.2	78.8
maker-scaffold10x_259_pilon-snap-gene-0.109-mRNA-1_transcript=maker-scaffold10x_259_pilon-snap-gene-0.109-mRNA-1_gene=maker-scaffold10x_259_pilon-snap-gene-0.109	A0A2H1BV14|A0A2H1BV14_FASHE_RHO_protein_GDP_dissociation_inhibitor_OS=Fasciola_hepatica_OX=6192_GN=D915_009732_PE=4_SV=1	A0A2H1BV14	100	6.3e-111	409.1	100	100
maker-scaffold10x_259_pilon-snap-gene-0.98-mRNA-1_transcript=maker-scaffold10x_259_pilon-snap-gene-0.98-mRNA-1_gene=maker-scaffold10x_259_pilon-snap-gene-0.98	A0A2H1BV14|A0A2H1BV14_FASHE_RHO_protein_GDP_dissociation_inhibitor_OS=Fasciola_hepatica_OX=6192_GN=D915_009732_PE=4_SV=1	A0A2H1BV14	87.8	1e-82	315.1	100	90.9
maker-scaffold10x_1035_pilon-snap-gene-0.13-mRNA-1_transcript=maker-scaffold10x_1035_pilon-snap-gene-0.13-mRNA-1_gene=maker-scaffold10x_1035_pilon-snap-gene-0.13	A0A2H1BV20|A0A2H1BV20_FASHE_Proteasome_subunit_beta_OS=Fasciola_hepatica_OX=6192_GN=D915_14164_PE=3_SV=1	A0A2H1BV20	99.4	1.4e-84	321.6	73.8	73.8
maker-scaffold10x_13_pilon-snap-gene-2.124-mRNA-1_transcript=maker-scaffold10x_13_pilon-snap-gene-2.124-mRNA-1_gene=maker-scaffold10x_13_pilon-snap-gene-2.124	A0A2H1BV27|A0A2H1BV27_FASHE_Bud_site_selection_protein_20_OS=Fasciola_hepatica_OX=6192_GN=D915_009558_PE=4_SV=1	A0A2H1BV27	97.8	1.8e-69	270.8	100	100
maker-scaffold10x_2336_pilon-snap-gene-0.7-mRNA-1_transcript=maker-scaffold10x_2336_pilon-snap-gene-0.7-mRNA-1_gene=maker-scaffold10x_2336_pilon-snap-gene-0.7	A0A2H1BV38|A0A2H1BV38_FASHE_SNRNP27_domain-containing_protein_OS=Fasciola_hepatica_OX=6192_GN=D915_14174_PE=4_SV=1	A0A2H1BV38	67.3	1.5e-38	167.9	100	100
maker-scaffold10x_217_pilon-snap-gene-1.142-mRNA-1_transcript=maker-scaffold10x_217_pilon-snap-gene-1.142-mRNA-1_gene=maker-scaffold10x_217_pilon-snap-gene-1.142	A0A2H1BV46|A0A2H1BV46_FASHE_Autophagy_protein_5_OS=Fasciola_hepatica_OX=6192_GN=D915_009544_PE=3_SV=1	A0A2H1BV46	100	3.7e-199	703.7	58.8	89.9
maker-scaffold10x_189_pilon-pred_gff_StringTie-gene-0.25-mRNA-1_transcript=maker-scaffold10x_189_pilon-pred_gff_StringTie-gene-0.25-mRNA-1_gene=maker-scaffold10x_189_pilon-pred_gff_StringTie-gene-0.25	A0A2H1BV50|A0A2H1BV50_FASHE_Dual_specificity_phosphatase,_catalytic_domain_protein_OS=Fasciola_hepatica_OX=6192_GN=D915_009663_PE=4_SV=1	A0A2H1BV50	99.4	1.9e-303	1050	100	100
augustus_masked-scaffold10x_2005_pilon-processed-gene-0.69-mRNA-1_transcript=augustus_masked-scaffold10x_2005_pilon-processed-gene-0.69-mRNA-1_gene=augustus_masked-scaffold10x_2005_pilon-processed-gene-0.69	A0A2H1BV54|A0A2H1BV54_FASHE_Cullin_family_protein_OS=Fasciola_hepatica_OX=6192_GN=D915_14133_PE=3_SV=1	A0A2H1BV54	100	1.5e-68	267.7	100	25
maker-scaffold10x_640_pilon-snap-gene-0.143-mRNA-1_transcript=maker-scaffold10x_640_pilon-snap-gene-0.143-mRNA-1_gene=maker-scaffold10x_640_pilon-snap-gene-0.143	A0A2H1BV71|A0A2H1BV71_FASHE_EF_hand_OS=Fasciola_hepatica_OX=6192_GN=D915_14958_PE=4_SV=1	A0A2H1BV71	100	2.5e-78	300.8	77.6	100
maker-scaffold10x_720_pilon-snap-gene-0.1-mRNA-1_transcript=maker-scaffold10x_720_pilon-snap-gene-0.1-mRNA-1_gene=maker-scaffold10x_720_pilon-snap-gene-0.1	A0A2H1BV81|A0A2H1BV81_FASHE_Acylphosphatase_OS=Fasciola_hepatica_OX=6192_GN=D915_14945_PE=3_SV=1	A0A2H1BV81	100	5.6e-28	132.5	63.9	62
maker-scaffold10x_563_pilon-augustus-gene-0.181-mRNA-1_transcript=maker-scaffold10x_563_pilon-augustus-gene-0.181-mRNA-1_gene=maker-scaffold10x_563_pilon-augustus-gene-0.181	A0A2H1BVF7|A0A2H1BVF7_FASHE_Protein-tyrosine_phosphatase_(Fragment)_OS=Fasciola_hepatica_OX=6192_GN=D915_14043_PE=4_SV=1	A0A2H1BVF7	100	4.2e-116	426.4	100	84
maker-scaffold10x_653_pilon-snap-gene-0.3-mRNA-1_transcript=maker-scaffold10x_653_pilon-snap-gene-0.3-mRNA-1_gene=maker-scaffold10x_653_pilon-snap-gene-0.3	A0A2H1BVH0|A0A2H1BVH0_FASHE_EF_hand_OS=Fasciola_hepatica_OX=6192_GN=D915_14014_PE=4_SV=1	A0A2H1BVH0	98.6	9e-31	141.4	97.2	70.7
maker-scaffold10x_205_pilon-snap-gene-0.81-mRNA-1_transcript=maker-scaffold10x_205_pilon-snap-gene-0.81-mRNA-1_gene=maker-scaffold10x_205_pilon-snap-gene-0.81	A0A2H1BVH2|A0A2H1BVH2_FASHE_DnaJ_domain_protein_OS=Fasciola_hepatica_OX=6192_GN=D915_009496_PE=4_SV=1	A0A2H1BVH2	100	9e-151	542	100	100
maker-scaffold10x_1256_pilon-snap-gene-0.1-mRNA-1_transcript=maker-scaffold10x_1256_pilon-snap-gene-0.1-mRNA-1_gene=maker-scaffold10x_1256_pilon-snap-gene-0.1	A0A2H1BVH6|A0A2H1BVH6_FASHE_SET_domain_protein_OS=Fasciola_hepatica_OX=6192_GN=D915_009450_PE=4_SV=1	A0A2H1BVH6	99.6	2.3e-275	957.6	49.6	100
maker-scaffold10x_261_pilon-augustus-gene-0.15-mRNA-1_transcript=maker-scaffold10x_261_pilon-augustus-gene-0.15-mRNA-1_gene=maker-scaffold10x_261_pilon-augustus-gene-0.15	A0A2H1BVM9|A0A2H1BVM9_FASHE_Pyrroline-5-carboxylate_reductase_OS=Fasciola_hepatica_OX=6192_GN=D915_009484_PE=4_SV=1	A0A2H1BVM9	100	1.8e-122	447.6	100	100
maker-scaffold10x_270_pilon-augustus-gene-0.1-mRNA-1_transcript=maker-scaffold10x_270_pilon-augustus-gene-0.1-mRNA-1_gene=maker-scaffold10x_270_pilon-augustus-gene-0.1	A0A2H1BVQ0|A0A2H1BVQ0_FASHE_RRM_domain-containing_protein_OS=Fasciola_hepatica_OX=6192_GN=D915_13923_PE=4_SV=1	A0A2H1BVQ0	100	5.9e-172	612.5	100	64.9
maker-scaffold10x_689_pilon-snap-gene-0.17-mRNA-1_transcript=maker-scaffold10x_689_pilon-snap-gene-0.17-mRNA-1_gene=maker-scaffold10x_689_pilon-snap-gene-0.17	A0A2H1BVQ1|A0A2H1BVQ1_FASHE_Casein_kinase_I_isoform_alpha_family_protein_OS=Fasciola_hepatica_OX=6192_GN=D915_14716_PE=4_SV=1	A0A2H1BVQ1	100	2.2e-189	670.6	87.7	100
maker-scaffold10x_800_pilon-snap-gene-0.5-mRNA-1_transcript=maker-scaffold10x_800_pilon-snap-gene-0.5-mRNA-1_gene=maker-scaffold10x_800_pilon-snap-gene-0.5	A0A2H1BVQ2|A0A2H1BVQ2_FASHE_Rhodanese-like_protein_OS=Fasciola_hepatica_OX=6192_GN=D915_009494_PE=4_SV=1	A0A2H1BVQ2	100	1.2e-17	97.1	100	25.9
maker-scaffold10x_280_pilon-snap-gene-0.121-mRNA-1_transcript=maker-scaffold10x_280_pilon-snap-gene-0.121-mRNA-1_gene=maker-scaffold10x_280_pilon-snap-gene-0.121	A0A2H1BVQ3|A0A2H1BVQ3_FASHE_Ubiquinol-cytochrome_C_chaperone_OS=Fasciola_hepatica_OX=6192_GN=D915_009524_PE=4_SV=1	A0A2H1BVQ3	99.6	3.7e-137	496.5	100	100
maker-scaffold10x_962_pilon-augustus-gene-0.38-mRNA-1_transcript=maker-scaffold10x_962_pilon-augustus-gene-0.38-mRNA-1_gene=maker-scaffold10x_962_pilon-augustus-gene-0.38	A0A2H1BVR1|A0A2H1BVR1_FASHE_Serine/arginine-rich_splicing_factor_1_OS=Fasciola_hepatica_OX=6192_GN=D915_009500_PE=4_SV=1	A0A2H1BVR1	100	1.9e-93	351.3	75.3	80.4
maker-scaffold10x_640_pilon-snap-gene-0.134-mRNA-1_transcript=maker-scaffold10x_640_pilon-snap-gene-0.134-mRNA-1_gene=maker-scaffold10x_640_pilon-snap-gene-0.134	A0A2H1BVR8|A0A2H1BVR8_FASHE_Integrase_core_domain_protein_OS=Fasciola_hepatica_OX=6192_GN=D915_13927_PE=4_SV=1	A0A2H1BVR8	75.3	1.4e-22	115.9	29.4	22
maker-scaffold10x_637_pilon-snap-gene-0.154-mRNA-1_transcript=maker-scaffold10x_637_pilon-snap-gene-0.154-mRNA-1_gene=maker-scaffold10x_637_pilon-snap-gene-0.154	A0A2H1BVS3|A0A2H1BVS3_FASHE_Helicase_ATP-binding_domain-containing_protein_OS=Fasciola_hepatica_OX=6192_GN=D915_14639_PE=4_SV=1	A0A2H1BVS3	99.2	2e-59	237.3	100	99.2
maker-scaffold10x_978_pilon-snap-gene-0.60-mRNA-1_transcript=maker-scaffold10x_978_pilon-snap-gene-0.60-mRNA-1_gene=maker-scaffold10x_978_pilon-snap-gene-0.60	A0A2H1BVS8|A0A2H1BVS8_FASHE_Putative_transcriptional_coactivator_caper_rrm_superfamily_OS=Fasciola_hepatica_OX=6192_GN=D915_009475_PE=4_SV=1	A0A2H1BVS8	100	4.6e-183	649.4	100	69
maker-scaffold10x_302_pilon-snap-gene-0.144-mRNA-1_transcript=maker-scaffold10x_302_pilon-snap-gene-0.144-mRNA-1_gene=maker-scaffold10x_302_pilon-snap-gene-0.144	A0A2H1BVT4|A0A2H1BVT4_FASHE_Integrase_core_domain_protein_(Fragment)_OS=Fasciola_hepatica_OX=6192_GN=D915_13942_PE=4_SV=1	A0A2H1BVT4	52.5	9.8e-06	60.1	21.9	20.5
snap_masked-scaffold10x_1521_pilon-processed-gene-0.0-mRNA-1_transcript=snap_masked-scaffold10x_1521_pilon-processed-gene-0.0-mRNA-1_gene=snap_masked-scaffold10x_1521_pilon-processed-gene-0.0	A0A2H1BVT4|A0A2H1BVT4_FASHE_Integrase_core_domain_protein_(Fragment)_OS=Fasciola_hepatica_OX=6192_GN=D915_13942_PE=4_SV=1	A0A2H1BVT4	93.7	1e-58	236.5	34.4	43.8
maker-scaffold10x_2006_pilon-snap-gene-0.13-mRNA-1_transcript=maker-scaffold10x_2006_pilon-snap-gene-0.13-mRNA-1_gene=maker-scaffold10x_2006_pilon-snap-gene-0.13	A0A2H1BVU2|A0A2H1BVU2_FASHE_Helicase_protein_OS=Fasciola_hepatica_OX=6192_GN=D915_13907_PE=4_SV=1	A0A2H1BVU2	95.9	9.3e-308	1065.1	70	100
maker-scaffold10x_1302_pilon-pred_gff_StringTie-gene-0.0-mRNA-1_transcript=maker-scaffold10x_1302_pilon-pred_gff_StringTie-gene-0.0-mRNA-1_gene=maker-scaffold10x_1302_pilon-pred_gff_StringTie-gene-0.0	A0A2H1BVV2|A0A2H1BVV2_FASHE_Mob1/phocein_family_protein_OS=Fasciola_hepatica_OX=6192_GN=D915_13912_PE=4_SV=1	A0A2H1BVV2	94	1e-96	361.7	100	84.3
maker-scaffold10x_211_pilon-snap-gene-0.28-mRNA-1_transcript=maker-scaffold10x_211_pilon-snap-gene-0.28-mRNA-1_gene=maker-scaffold10x_211_pilon-snap-gene-0.28	A0A2H1BVV2|A0A2H1BVV2_FASHE_Mob1/phocein_family_protein_OS=Fasciola_hepatica_OX=6192_GN=D915_13912_PE=4_SV=1	A0A2H1BVV2	100	1.5e-129	471.1	100	100
maker-scaffold10x_770_pilon-snap-gene-0.20-mRNA-1_transcript=maker-scaffold10x_770_pilon-snap-gene-0.20-mRNA-1_gene=maker-scaffold10x_770_pilon-snap-gene-0.20	A0A2H1BVW2|A0A2H1BVW2_FASHE_DNA_helicase_OS=Fasciola_hepatica_OX=6192_GN=D915_13865_PE=3_SV=1	A0A2H1BVW2	94.1	0	1365.1	100	100
maker-scaffold10x_1190_pilon-augustus-gene-0.53-mRNA-1_transcript=maker-scaffold10x_1190_pilon-augustus-gene-0.53-mRNA-1_gene=maker-scaffold10x_1190_pilon-augustus-gene-0.53	A0A2H1BVY2|A0A2H1BVY2_FASHE_DEAD/DEAH_box_helicase_OS=Fasciola_hepatica_OX=6192_GN=D915_13888_PE=4_SV=1	A0A2H1BVY2	100	2.6e-110	407.1	97.6	71.4
maker-scaffold10x_1639_pilon-snap-gene-0.11-mRNA-1_transcript=maker-scaffold10x_1639_pilon-snap-gene-0.11-mRNA-1_gene=maker-scaffold10x_1639_pilon-snap-gene-0.11	A0A2H1BVY5|A0A2H1BVY5_FASHE_14-3-3_protein_OS=Fasciola_hepatica_OX=6192_GN=D915_13880_PE=3_SV=1	A0A2H1BVY5	100	1.4e-126	461.5	92.2	97.1
maker-scaffold10x_815_pilon-snap-gene-1.92-mRNA-1_transcript=maker-scaffold10x_815_pilon-snap-gene-1.92-mRNA-1_gene=maker-scaffold10x_815_pilon-snap-gene-1.92	A0A2H1BVZ9|A0A2H1BVZ9_FASHE_Stefin-1_OS=Fasciola_hepatica_OX=6192_GN=D915_009335_PE=4_SV=1	A0A2H1BVZ9	100	6.9e-50	205.3	100	100
snap_masked-scaffold10x_54_pilon-processed-gene-0.8-mRNA-1_transcript=snap_masked-scaffold10x_54_pilon-processed-gene-0.8-mRNA-1_gene=snap_masked-scaffold10x_54_pilon-processed-gene-0.8	A0A2H1BW05|A0A2H1BW05_FASHE_Phage_minor_structural_protein_OS=Fasciola_hepatica_OX=6192_GN=D915_13818_PE=4_SV=1	A0A2H1BW05	99.8	0	7930.1	97.9	100
maker-scaffold10x_604_pilon-snap-gene-0.79-mRNA-1_transcript=maker-scaffold10x_604_pilon-snap-gene-0.79-mRNA-1_gene=maker-scaffold10x_604_pilon-snap-gene-0.79	A0A2H1BW12|A0A2H1BW12_FASHE_Hexosyltransferase_(Fragment)_OS=Fasciola_hepatica_OX=6192_GN=D915_14590_PE=3_SV=1	A0A2H1BW12	100	1.2e-39	172.6	33.5	21.1
maker-scaffold10x_447_pilon-snap-gene-0.8-mRNA-1_transcript=maker-scaffold10x_447_pilon-snap-gene-0.8-mRNA-1_gene=maker-scaffold10x_447_pilon-snap-gene-0.8	A0A2H1BW46|A0A2H1BW46_FASHE_Integrase_core_domain_protein_OS=Fasciola_hepatica_OX=6192_GN=D915_13769_PE=4_SV=1	A0A2H1BW46	99.2	0	1478	96.5	85.2
snap_masked-scaffold10x_1154_pilon-processed-gene-0.4-mRNA-1_transcript=snap_masked-scaffold10x_1154_pilon-processed-gene-0.4-mRNA-1_gene=snap_masked-scaffold10x_1154_pilon-processed-gene-0.4	A0A2H1BW48|A0A2H1BW48_FASHE_Thioredoxin_OS=Fasciola_hepatica_OX=6192_GN=D915_13811_PE=4_SV=1	A0A2H1BW48	100	4.4e-110	406.4	91.6	71
maker-scaffold10x_1885_pilon-pred_gff_StringTie-gene-0.6-mRNA-1_transcript=maker-scaffold10x_1885_pilon-pred_gff_StringTie-gene-0.6-mRNA-1_gene=maker-scaffold10x_1885_pilon-pred_gff_StringTie-gene-0.6	A0A2H1BW72|A0A2H1BW72_FASHE_Sphingomyelin_synthetase_OS=Fasciola_hepatica_OX=6192_GN=D915_009903_PE=4_SV=1	A0A2H1BW72	99.8	5.2e-262	912.1	100	95.7
augustus_masked-scaffold10x_508_pilon-processed-gene-0.15-mRNA-1_transcript=augustus_masked-scaffold10x_508_pilon-processed-gene-0.15-mRNA-1_gene=augustus_masked-scaffold10x_508_pilon-processed-gene-0.15	A0A2H1BW82|A0A2H1BW82_FASHE_EXOSC1_domain-containing_protein_OS=Fasciola_hepatica_OX=6192_GN=D915_13762_PE=4_SV=1	A0A2H1BW82	99.5	1.7e-103	384.4	100	82.7
maker-scaffold10x_1652_pilon-snap-gene-0.2-mRNA-1_transcript=maker-scaffold10x_1652_pilon-snap-gene-0.2-mRNA-1_gene=maker-scaffold10x_1652_pilon-snap-gene-0.2	A0A2H1BW84|A0A2H1BW84_FASHE_Arrestin_domain_protein_OS=Fasciola_hepatica_OX=6192_GN=D915_009379_PE=4_SV=1	A0A2H1BW84	96.8	1.3e-294	1020.8	100	100
maker-scaffold10x_1597_pilon-snap-gene-0.3-mRNA-1_transcript=maker-scaffold10x_1597_pilon-snap-gene-0.3-mRNA-1_gene=maker-scaffold10x_1597_pilon-snap-gene-0.3	A0A2H1BWA4|A0A2H1BWA4_FASHE_Filamin/ABP280_repeat_protein_OS=Fasciola_hepatica_OX=6192_GN=D915_009882_PE=4_SV=1	A0A2H1BWA4	100	1.2e-200	708	100	100
maker-scaffold10x_113_pilon-snap-gene-0.214-mRNA-1_transcript=maker-scaffold10x_113_pilon-snap-gene-0.214-mRNA-1_gene=maker-scaffold10x_113_pilon-snap-gene-0.214	A0A2H1BWA6|A0A2H1BWA6_FASHE_Integrase_core_domain_protein_OS=Fasciola_hepatica_OX=6192_GN=D915_14492_PE=4_SV=1	A0A2H1BWA6	31.4	2.9e-23	117.5	98.7	25.5
maker-scaffold10x_1422_pilon-snap-gene-0.0-mRNA-1_transcript=maker-scaffold10x_1422_pilon-snap-gene-0.0-mRNA-1_gene=maker-scaffold10x_1422_pilon-snap-gene-0.0	A0A2H1BWA6|A0A2H1BWA6_FASHE_Integrase_core_domain_protein_OS=Fasciola_hepatica_OX=6192_GN=D915_14492_PE=4_SV=1	A0A2H1BWA6	31.3	1.5e-17	99.4	52.2	26
maker-scaffold10x_23_pilon-snap-gene-0.91-mRNA-1_transcript=maker-scaffold10x_23_pilon-snap-gene-0.91-mRNA-1_gene=maker-scaffold10x_23_pilon-snap-gene-0.91	A0A2H1BWA6|A0A2H1BWA6_FASHE_Integrase_core_domain_protein_OS=Fasciola_hepatica_OX=6192_GN=D915_14492_PE=4_SV=1	A0A2H1BWA6	35.9	4.1e-16	94.7	37	18.9
maker-scaffold10x_471_pilon-augustus-gene-0.11-mRNA-1_transcript=maker-scaffold10x_471_pilon-augustus-gene-0.11-mRNA-1_gene=maker-scaffold10x_471_pilon-augustus-gene-0.11	A0A2H1BWA7|A0A2H1BWA7_FASHE_DNA_replication_complex_GINS_protein_PSF1_OS=Fasciola_hepatica_OX=6192_GN=D915_009285_PE=4_SV=1	A0A2H1BWA7	100	3.5e-112	413.3	100	100
snap_masked-scaffold10x_2205_pilon-processed-gene-0.5-mRNA-1_transcript=snap_masked-scaffold10x_2205_pilon-processed-gene-0.5-mRNA-1_gene=snap_masked-scaffold10x_2205_pilon-processed-gene-0.5	A0A2H1BWB1|A0A2H1BWB1_FASHE_Kynureninase_OS=Fasciola_hepatica_OX=6192_GN=D915_009366_PE=3_SV=1	A0A2H1BWB1	100	1.7e-279	970.3	97	95.8
maker-scaffold10x_342_pilon-augustus-gene-0.170-mRNA-1_transcript=maker-scaffold10x_342_pilon-augustus-gene-0.170-mRNA-1_gene=maker-scaffold10x_342_pilon-augustus-gene-0.170	A0A2H1BWB5|A0A2H1BWB5_FASHE_FAR1_DNA-binding_domain_protein_OS=Fasciola_hepatica_OX=6192_GN=D915_13721_PE=4_SV=1	A0A2H1BWB5	37.5	2.5e-06	62.8	21.6	40.1
maker-scaffold10x_374_pilon-snap-gene-0.37-mRNA-1_transcript=maker-scaffold10x_374_pilon-snap-gene-0.37-mRNA-1_gene=maker-scaffold10x_374_pilon-snap-gene-0.37	A0A2H1BWC3|A0A2H1BWC3_FASHE_CBS_domain_protein_OS=Fasciola_hepatica_OX=6192_GN=D915_13760_PE=4_SV=1	A0A2H1BWC3	99.6	2.2e-157	564.3	72.1	96.4
maker-scaffold10x_1598_pilon-snap-gene-0.1-mRNA-1_transcript=maker-scaffold10x_1598_pilon-snap-gene-0.1-mRNA-1_gene=maker-scaffold10x_1598_pilon-snap-gene-0.1	A0A2H1BWC4|A0A2H1BWC4_FASHE_Nuclease-like_protein_OS=Fasciola_hepatica_OX=6192_GN=D915_14413_PE=4_SV=1	A0A2H1BWC4	66.1	1.6e-167	599.7	36.3	76.9
maker-scaffold10x_485_pilon-snap-gene-0.88-mRNA-1_transcript=maker-scaffold10x_485_pilon-snap-gene-0.88-mRNA-1_gene=maker-scaffold10x_485_pilon-snap-gene-0.88	A0A2H1BWC4|A0A2H1BWC4_FASHE_Nuclease-like_protein_OS=Fasciola_hepatica_OX=6192_GN=D915_14413_PE=4_SV=1	A0A2H1BWC4	47.8	5e-105	389.8	100	75.4
maker-scaffold10x_2607_pilon-snap-gene-0.1-mRNA-1_transcript=maker-scaffold10x_2607_pilon-snap-gene-0.1-mRNA-1_gene=maker-scaffold10x_2607_pilon-snap-gene-0.1	A0A2H1BWC6|A0A2H1BWC6_FASHE_Wee1_protein_kinase_OS=Fasciola_hepatica_OX=6192_GN=D915_009129_PE=4_SV=1	A0A2H1BWC6	100	0	1150.6	93.2	96.6
maker-scaffold10x_1547_pilon-augustus-gene-0.32-mRNA-1_transcript=maker-scaffold10x_1547_pilon-augustus-gene-0.32-mRNA-1_gene=maker-scaffold10x_1547_pilon-augustus-gene-0.32	A0A2H1BWE3|A0A2H1BWE3_FASHE_Helicase_associated_domain_protein_(Fragment)_OS=Fasciola_hepatica_OX=6192_GN=D915_14386_PE=4_SV=1	A0A2H1BWE3	98.6	5.8e-74	285.8	100	68.4
maker-scaffold10x_1296_pilon-snap-gene-0.15-mRNA-1_transcript=maker-scaffold10x_1296_pilon-snap-gene-0.15-mRNA-1_gene=maker-scaffold10x_1296_pilon-snap-gene-0.15	A0A2H1BWF1|A0A2H1BWF1_FASHE_Peptidyl-prolyl_cis-trans_isomerase_OS=Fasciola_hepatica_OX=6192_GN=D915_009870_PE=3_SV=1	A0A2H1BWF1	100	4.8e-117	429.5	100	100
maker-scaffold10x_313_pilon-snap-gene-0.97-mRNA-1_transcript=maker-scaffold10x_313_pilon-snap-gene-0.97-mRNA-1_gene=maker-scaffold10x_313_pilon-snap-gene-0.97	A0A2H1BWF2|A0A2H1BWF2_FASHE_Ribosomal_protein_S19_OS=Fasciola_hepatica_OX=6192_GN=D915_13673_PE=3_SV=1	A0A2H1BWF2	100	6.3e-76	292.4	100	100
snap_masked-scaffold10x_1592_pilon-processed-gene-0.3-mRNA-1_transcript=snap_masked-scaffold10x_1592_pilon-processed-gene-0.3-mRNA-1_gene=snap_masked-scaffold10x_1592_pilon-processed-gene-0.3	A0A2H1BWG3|A0A2H1BWG3_FASHE_DnaJ_domain_protein_OS=Fasciola_hepatica_OX=6192_GN=D915_13671_PE=4_SV=1	A0A2H1BWG3	95.5	3.6e-132	480.3	83.6	50
snap_masked-scaffold10x_1592_pilon-processed-gene-0.4-mRNA-1_transcript=snap_masked-scaffold10x_1592_pilon-processed-gene-0.4-mRNA-1_gene=snap_masked-scaffold10x_1592_pilon-processed-gene-0.4	A0A2H1BWG3|A0A2H1BWG3_FASHE_DnaJ_domain_protein_OS=Fasciola_hepatica_OX=6192_GN=D915_13671_PE=4_SV=1	A0A2H1BWG3	100	9.3e-86	325.1	100	28.5
maker-scaffold10x_71_pilon-snap-gene-0.100-mRNA-1_transcript=maker-scaffold10x_71_pilon-snap-gene-0.100-mRNA-1_gene=maker-scaffold10x_71_pilon-snap-gene-0.100	A0A2H1BWH6|A0A2H1BWH6_FASHE_Rhodanese-like_protein_OS=Fasciola_hepatica_OX=6192_GN=D915_13697_PE=4_SV=1	A0A2H1BWH6	100	4.7e-97	362.8	100	100
snap_masked-scaffold10x_1928_pilon-processed-gene-0.21-mRNA-1_transcript=snap_masked-scaffold10x_1928_pilon-processed-gene-0.21-mRNA-1_gene=snap_masked-scaffold10x_1928_pilon-processed-gene-0.21	A0A2H1BWI4|A0A2H1BWI4_FASHE_Anamorsin_homolog_OS=Fasciola_hepatica_OX=6192_GN=D915_13649_PE=3_SV=1	A0A2H1BWI4	100	4.6e-135	489.6	97.6	75
maker-scaffold10x_588_pilon-snap-gene-0.10-mRNA-1_transcript=maker-scaffold10x_588_pilon-snap-gene-0.10-mRNA-1_gene=maker-scaffold10x_588_pilon-snap-gene-0.10	A0A2H1BWK4|A0A2H1BWK4_FASHE_Zinc_finger_protein_OS=Fasciola_hepatica_OX=6192_GN=D915_009251_PE=4_SV=1	A0A2H1BWK4	99.8	0	1604.7	100	100
snap_masked-scaffold10x_735_pilon-processed-gene-0.67-mRNA-1_transcript=snap_masked-scaffold10x_735_pilon-processed-gene-0.67-mRNA-1_gene=snap_masked-scaffold10x_735_pilon-processed-gene-0.67	A0A2H1BWK6|A0A2H1BWK6_FASHE_Cyclin_domain_protein_OS=Fasciola_hepatica_OX=6192_GN=D915_13619_PE=3_SV=1	A0A2H1BWK6	99.6	1.4e-262	914.1	97	75.9
maker-scaffold10x_149_pilon-snap-gene-0.99-mRNA-1_transcript=maker-scaffold10x_149_pilon-snap-gene-0.99-mRNA-1_gene=maker-scaffold10x_149_pilon-snap-gene-0.99	A0A2H1BWL2|A0A2H1BWL2_FASHE_ATP_synthase_subunit_d,_mitochondrial_OS=Fasciola_hepatica_OX=6192_GN=D915_009069_PE=3_SV=1	A0A2H1BWL2	100	9.7e-95	355.1	100	100
maker-scaffold10x_453_pilon-snap-gene-0.5-mRNA-1_transcript=maker-scaffold10x_453_pilon-snap-gene-0.5-mRNA-1_gene=maker-scaffold10x_453_pilon-snap-gene-0.5	A0A2H1BWR1|A0A2H1BWR1_FASHE_EF_hand_(Fragment)_OS=Fasciola_hepatica_OX=6192_GN=D915_13584_PE=4_SV=1	A0A2H1BWR1	100	2.2e-142	514.2	89.1	89.6
maker-scaffold10x_7_pilon-pred_gff_StringTie-gene-1.153-mRNA-1_transcript=maker-scaffold10x_7_pilon-pred_gff_StringTie-gene-1.153-mRNA-1_gene=maker-scaffold10x_7_pilon-pred_gff_StringTie-gene-1.153	A0A2H1BWT0|A0A2H1BWT0_FASHE_E3_ubiquitin-protein_ligase_CBL_OS=Fasciola_hepatica_OX=6192_GN=D915_008908_PE=4_SV=1	A0A2H1BWT0	99.7	0	1521.5	100	100
augustus_masked-scaffold10x_1859_pilon-processed-gene-0.55-mRNA-1_transcript=augustus_masked-scaffold10x_1859_pilon-processed-gene-0.55-mRNA-1_gene=augustus_masked-scaffold10x_1859_pilon-processed-gene-0.55	A0A2H1BWU2|A0A2H1BWU2_FASHE_Histone_deacetylase_OS=Fasciola_hepatica_OX=6192_GN=D915_009817_PE=3_SV=1	A0A2H1BWU2	96.4	1.4e-35	157.9	78.5	49.1
augustus_masked-scaffold10x_2722_pilon-processed-gene-0.1-mRNA-1_transcript=augustus_masked-scaffold10x_2722_pilon-processed-gene-0.1-mRNA-1_gene=augustus_masked-scaffold10x_2722_pilon-processed-gene-0.1	A0A2H1BWU2|A0A2H1BWU2_FASHE_Histone_deacetylase_OS=Fasciola_hepatica_OX=6192_GN=D915_009817_PE=3_SV=1	A0A2H1BWU2	99.4	7.2e-63	249.2	100	100
maker-scaffold10x_318_pilon-pred_gff_StringTie-gene-0.29-mRNA-1_transcript=maker-scaffold10x_318_pilon-pred_gff_StringTie-gene-0.29-mRNA-1_gene=maker-scaffold10x_318_pilon-pred_gff_StringTie-gene-0.29	A0A2H1BWU4|A0A2H1BWU4_FASHE_Histone-lysine_N-methyltransferase_MLL3_OS=Fasciola_hepatica_OX=6192_GN=D915_009070_PE=4_SV=1	A0A2H1BWU4	100	0	3455.2	100	100
maker-scaffold10x_342_pilon-snap-gene-0.56-mRNA-1_transcript=maker-scaffold10x_342_pilon-snap-gene-0.56-mRNA-1_gene=maker-scaffold10x_342_pilon-snap-gene-0.56	A0A2H1BWV7|A0A2H1BWV7_FASHE_Diphthine_methyl_ester_synthase_OS=Fasciola_hepatica_OX=6192_GN=D915_009198_PE=3_SV=1	A0A2H1BWV7	97.7	2.3e-168	600.5	100	88.8
maker-scaffold10x_72_pilon-snap-gene-0.10-mRNA-1_transcript=maker-scaffold10x_72_pilon-snap-gene-0.10-mRNA-1_gene=maker-scaffold10x_72_pilon-snap-gene-0.10	A0A2H1BWW6|A0A2H1BWW6_FASHE_Kunitz/Bovine_pancreatic_trypsin_inhibitor_domain_protein_OS=Fasciola_hepatica_OX=6192_GN=D915_009086_PE=4_SV=1	A0A2H1BWW6	84.9	6.3e-45	188.7	100	66
maker-scaffold10x_2706_pilon-snap-gene-0.15-mRNA-1_transcript=maker-scaffold10x_2706_pilon-snap-gene-0.15-mRNA-1_gene=maker-scaffold10x_2706_pilon-snap-gene-0.15	A0A2H1BWY6|A0A2H1BWY6_FASHE_Glyceraldehyde-3-phosphate_dehydrogenase_OS=Fasciola_hepatica_OX=6192_GN=D915_008934_PE=3_SV=1	A0A2H1BWY6	100	4.7e-191	676	100	100
maker-scaffold10x_2761_pilon-snap-gene-0.1-mRNA-1_transcript=maker-scaffold10x_2761_pilon-snap-gene-0.1-mRNA-1_gene=maker-scaffold10x_2761_pilon-snap-gene-0.1	A0A2H1BWZ8|A0A2H1BWZ8_FASHE_Deltameth_res_domain-containing_protein_OS=Fasciola_hepatica_OX=6192_GN=D915_13497_PE=4_SV=1	A0A2H1BWZ8	100	4.2e-62	246.1	100	100
maker-scaffold10x_962_pilon-snap-gene-0.10-mRNA-1_transcript=maker-scaffold10x_962_pilon-snap-gene-0.10-mRNA-1_gene=maker-scaffold10x_962_pilon-snap-gene-0.10	A0A2H1BX04|A0A2H1BX04_FASHE_Aldolase_II_domain-containing_protein_OS=Fasciola_hepatica_OX=6192_GN=D915_14158_PE=4_SV=1	A0A2H1BX04	100	5.8e-53	215.7	92	100
maker-scaffold10x_222_pilon-snap-gene-0.12-mRNA-1_transcript=maker-scaffold10x_222_pilon-snap-gene-0.12-mRNA-1_gene=maker-scaffold10x_222_pilon-snap-gene-0.12	A0A2H1BX12|A0A2H1BX12_FASHE_Ribosomal_protein_L3_OS=Fasciola_hepatica_OX=6192_GN=D915_009586_PE=3_SV=1	A0A2H1BX12	100	1.6e-241	844	100	100
maker-scaffold10x_377_pilon-snap-gene-0.65-mRNA-1_transcript=maker-scaffold10x_377_pilon-snap-gene-0.65-mRNA-1_gene=maker-scaffold10x_377_pilon-snap-gene-0.65	A0A2H1BX27|A0A2H1BX27_FASHE_Phospholipase,_patatin_family_OS=Fasciola_hepatica_OX=6192_GN=D915_13447_PE=4_SV=1	A0A2H1BX27	95.3	7.8e-258	898.3	100	100
maker-scaffold10x_729_pilon-snap-gene-0.3-mRNA-1_transcript=maker-scaffold10x_729_pilon-snap-gene-0.3-mRNA-1_gene=maker-scaffold10x_729_pilon-snap-gene-0.3	A0A2H1BX37|A0A2H1BX37_FASHE_Regulator_of_condensation_OS=Fasciola_hepatica_OX=6192_GN=D915_008962_PE=4_SV=1	A0A2H1BX37	100	3.4e-291	1009.2	100	100
maker-scaffold10x_511_pilon-augustus-gene-0.6-mRNA-1_transcript=maker-scaffold10x_511_pilon-augustus-gene-0.6-mRNA-1_gene=maker-scaffold10x_511_pilon-augustus-gene-0.6	A0A2H1BX74|A0A2H1BX74_FASHE_Tetratricopeptide_repeat_protein_OS=Fasciola_hepatica_OX=6192_GN=D915_009076_PE=4_SV=1	A0A2H1BX74	82.7	4.8e-183	649.4	100	100
maker-scaffold10x_648_pilon-snap-gene-0.23-mRNA-1_transcript=maker-scaffold10x_648_pilon-snap-gene-0.23-mRNA-1_gene=maker-scaffold10x_648_pilon-snap-gene-0.23	A0A2H1BXB3|A0A2H1BXB3_FASHE_Ankyrin_repeat_protein_OS=Fasciola_hepatica_OX=6192_GN=D915_13382_PE=4_SV=1	A0A2H1BXB3	97.3	2.1e-58	234.6	93.9	100
maker-scaffold10x_66_pilon-augustus-gene-0.83-mRNA-1_transcript=maker-scaffold10x_66_pilon-augustus-gene-0.83-mRNA-1_gene=maker-scaffold10x_66_pilon-augustus-gene-0.83	A0A2H1BXD7|A0A2H1BXD7_FASHE_RWD_domain_protein_OS=Fasciola_hepatica_OX=6192_GN=D915_008748_PE=4_SV=1	A0A2H1BXD7	44.6	1.3e-25	124.4	100	100
maker-scaffold10x_1569_pilon-snap-gene-0.2-mRNA-1_transcript=maker-scaffold10x_1569_pilon-snap-gene-0.2-mRNA-1_gene=maker-scaffold10x_1569_pilon-snap-gene-0.2	A0A2H1BXD8|A0A2H1BXD8_FASHE_Zinc_finger,_C2H2_type_OS=Fasciola_hepatica_OX=6192_GN=D915_13336_PE=4_SV=1	A0A2H1BXD8	98.2	0	1213	27.7	91.9
maker-scaffold10x_632_pilon-snap-gene-0.49-mRNA-1_transcript=maker-scaffold10x_632_pilon-snap-gene-0.49-mRNA-1_gene=maker-scaffold10x_632_pilon-snap-gene-0.49	A0A2H1BXE5|A0A2H1BXE5_FASHE_Synaptobrevin_OS=Fasciola_hepatica_OX=6192_GN=D915_009028_PE=4_SV=1	A0A2H1BXE5	88.9	7.7e-28	132.9	57.2	94.3
maker-scaffold10x_66_pilon-snap-gene-0.11-mRNA-1_transcript=maker-scaffold10x_66_pilon-snap-gene-0.11-mRNA-1_gene=maker-scaffold10x_66_pilon-snap-gene-0.11	A0A2H1BXF2|A0A2H1BXF2_FASHE_Abhydrolase_3_domain-containing_protein_OS=Fasciola_hepatica_OX=6192_GN=D915_13328_PE=4_SV=1	A0A2H1BXF2	99.6	1e-135	491.9	90.7	64.3
maker-scaffold10x_58_pilon-snap-gene-0.139-mRNA-1_transcript=maker-scaffold10x_58_pilon-snap-gene-0.139-mRNA-1_gene=maker-scaffold10x_58_pilon-snap-gene-0.139	A0A2H1BXI5|A0A2H1BXI5_FASHE_DEAD/DEAH_box_helicase_OS=Fasciola_hepatica_OX=6192_GN=D915_13284_PE=4_SV=1	A0A2H1BXI5	99	0	2774.2	97.1	97.8
maker-scaffold10x_617_pilon-snap-gene-0.27-mRNA-1_transcript=maker-scaffold10x_617_pilon-snap-gene-0.27-mRNA-1_gene=maker-scaffold10x_617_pilon-snap-gene-0.27	A0A2H1BXJ6|A0A2H1BXJ6_FASHE_Oxidoreductase,_short_chain_dehydrogenase/reductase_family_protein_OS=Fasciola_hepatica_OX=6192_GN=D915_008781_PE=4_SV=1	A0A2H1BXJ6	100	9.4e-184	651.7	100	99.4
maker-scaffold10x_520_pilon-snap-gene-0.13-mRNA-1_transcript=maker-scaffold10x_520_pilon-snap-gene-0.13-mRNA-1_gene=maker-scaffold10x_520_pilon-snap-gene-0.13	A0A2H1BXL8|A0A2H1BXL8_FASHE_SH3_domain_protein_(Fragment)_OS=Fasciola_hepatica_OX=6192_GN=D915_13238_PE=4_SV=1	A0A2H1BXL8	100	7.1e-59	236.1	61.1	28.6
maker-scaffold10x_302_pilon-snap-gene-0.145-mRNA-1_transcript=maker-scaffold10x_302_pilon-snap-gene-0.145-mRNA-1_gene=maker-scaffold10x_302_pilon-snap-gene-0.145	A0A2H1BXS3|A0A2H1BXS3_FASHE_Flavoprotein_OS=Fasciola_hepatica_OX=6192_GN=D915_13183_PE=4_SV=1	A0A2H1BXS3	99.5	6.2e-111	409.8	60.2	100
maker-scaffold10x_1569_pilon-snap-gene-0.3-mRNA-1_transcript=maker-scaffold10x_1569_pilon-snap-gene-0.3-mRNA-1_gene=maker-scaffold10x_1569_pilon-snap-gene-0.3	A0A2H1BXT9|A0A2H1BXT9_FASHE_MFS_domain-containing_protein_OS=Fasciola_hepatica_OX=6192_GN=D915_13904_PE=4_SV=1	A0A2H1BXT9	94.8	1e-150	542.3	74.9	97
maker-scaffold10x_188_pilon-snap-gene-0.15-mRNA-1_transcript=maker-scaffold10x_188_pilon-snap-gene-0.15-mRNA-1_gene=maker-scaffold10x_188_pilon-snap-gene-0.15	A0A2H1BXU4|A0A2H1BXU4_FASHE_DnaJ_region_(Fragment)_OS=Fasciola_hepatica_OX=6192_GN=D915_13161_PE=4_SV=1	A0A2H1BXU4	98.6	8.4e-123	448.7	95.2	82.3
maker-scaffold10x_324_pilon-snap-gene-0.78-mRNA-1_transcript=maker-scaffold10x_324_pilon-snap-gene-0.78-mRNA-1_gene=maker-scaffold10x_324_pilon-snap-gene-0.78	A0A2H1BXV5|A0A2H1BXV5_FASHE_Protein_translocase_SEC61_complex_gamma_subunit,_and_eukaryotic_OS=Fasciola_hepatica_OX=6192_GN=D915_13168_PE=3_SV=1	A0A2H1BXV5	100	2.3e-28	133.3	100	100
maker-scaffold10x_563_pilon-snap-gene-0.115-mRNA-1_transcript=maker-scaffold10x_563_pilon-snap-gene-0.115-mRNA-1_gene=maker-scaffold10x_563_pilon-snap-gene-0.115	A0A2H1BXX7|A0A2H1BXX7_FASHE_Corepressor_interacting_with_RBPJ_OS=Fasciola_hepatica_OX=6192_GN=D915_008777_PE=4_SV=1	A0A2H1BXX7	97.5	2.8e-108	400.6	80	78.7
maker-scaffold10x_440_pilon-snap-gene-0.4-mRNA-1_transcript=maker-scaffold10x_440_pilon-snap-gene-0.4-mRNA-1_gene=maker-scaffold10x_440_pilon-snap-gene-0.4	A0A2H1BXZ5|A0A2H1BXZ5_FASHE_Zinc_finger,_C3HC4_type_(Fragment)_OS=Fasciola_hepatica_OX=6192_GN=D915_13104_PE=4_SV=1	A0A2H1BXZ5	99.5	4.2e-116	426.4	100	82.4
snap_masked-scaffold10x_608_pilon-processed-gene-0.6-mRNA-1_transcript=snap_masked-scaffold10x_608_pilon-processed-gene-0.6-mRNA-1_gene=snap_masked-scaffold10x_608_pilon-processed-gene-0.6	A0A2H1BY04|A0A2H1BY04_FASHE_Transmembrane_protein_OS=Fasciola_hepatica_OX=6192_GN=D915_008612_PE=4_SV=1	A0A2H1BY04	100	7e-78	298.9	100	100
maker-scaffold10x_383_pilon-snap-gene-0.21-mRNA-1_transcript=maker-scaffold10x_383_pilon-snap-gene-0.21-mRNA-1_gene=maker-scaffold10x_383_pilon-snap-gene-0.21	A0A2H1BY15|A0A2H1BY15_FASHE_TAF8_C_domain-containing_protein_(Fragment)_OS=Fasciola_hepatica_OX=6192_GN=D915_13084_PE=4_SV=1	A0A2H1BY15	78.9	2.3e-103	384	95.7	96.2
maker-scaffold10x_338_pilon-augustus-gene-0.109-mRNA-1_transcript=maker-scaffold10x_338_pilon-augustus-gene-0.109-mRNA-1_gene=maker-scaffold10x_338_pilon-augustus-gene-0.109	A0A2H1BY32|A0A2H1BY32_FASHE_Nucleoside_diphosphate_kinase_OS=Fasciola_hepatica_OX=6192_GN=D915_008547_PE=3_SV=1	A0A2H1BY32	100	5.1e-84	319.3	100	100
augustus_masked-scaffold10x_149_pilon-processed-gene-0.60-mRNA-1_transcript=augustus_masked-scaffold10x_149_pilon-processed-gene-0.60-mRNA-1_gene=augustus_masked-scaffold10x_149_pilon-processed-gene-0.60	A0A2H1BY44|A0A2H1BY44_FASHE_Spliceosome-associated-protein_114_OS=Fasciola_hepatica_OX=6192_GN=D915_008382_PE=4_SV=1	A0A2H1BY44	99.2	1.7e-297	1030.4	100	87.3
maker-scaffold10x_1972_pilon-snap-gene-0.23-mRNA-1_transcript=maker-scaffold10x_1972_pilon-snap-gene-0.23-mRNA-1_gene=maker-scaffold10x_1972_pilon-snap-gene-0.23	A0A2H1BY45|A0A2H1BY45_FASHE_Ribosomal_protein_L6_component_of_cytosolic_80S_ribosome_and_60S_large_subunit_OS=Fasciola_hepatica_OX=6192_GN=D915_008673_PE=4_SV=1	A0A2H1BY45	100	2.6e-130	473.8	100	100
maker-scaffold10x_935_pilon-snap-gene-0.41-mRNA-1_transcript=maker-scaffold10x_935_pilon-snap-gene-0.41-mRNA-1_gene=maker-scaffold10x_935_pilon-snap-gene-0.41	A0A2H1BY53|A0A2H1BY53_FASHE_Phosphopyruvate_hydratase_OS=Fasciola_hepatica_OX=6192_GN=D915_13056_PE=3_SV=1	A0A2H1BY53	94.2	4.9e-296	1025.4	100	99.3
maker-scaffold10x_485_pilon-pred_gff_StringTie-gene-0.100-mRNA-1_transcript=maker-scaffold10x_485_pilon-pred_gff_StringTie-gene-0.100-mRNA-1_gene=maker-scaffold10x_485_pilon-pred_gff_StringTie-gene-0.100	A0A2H1BY71|A0A2H1BY71_FASHE_DUF4209_domain-containing_protein_OS=Fasciola_hepatica_OX=6192_GN=D915_13016_PE=4_SV=1	A0A2H1BY71	99.4	0	1293.1	90.9	100
maker-scaffold10x_798_pilon-snap-gene-0.24-mRNA-1_transcript=maker-scaffold10x_798_pilon-snap-gene-0.24-mRNA-1_gene=maker-scaffold10x_798_pilon-snap-gene-0.24	A0A2H1BY98|A0A2H1BY98_FASHE_Saposin_A-type_domain_protein_OS=Fasciola_hepatica_OX=6192_GN=D915_13662_PE=4_SV=1	A0A2H1BY98	99.1	2.8e-56	229.2	17.5	100
maker-scaffold10x_938_pilon-snap-gene-0.54-mRNA-1_transcript=maker-scaffold10x_938_pilon-snap-gene-0.54-mRNA-1_gene=maker-scaffold10x_938_pilon-snap-gene-0.54	A0A2H1BYD6|A0A2H1BYD6_FASHE_60S_ribosomal_protein_L7_OS=Fasciola_hepatica_OX=6192_GN=D915_008456_PE=4_SV=1	A0A2H1BYD6	100	3.2e-139	503.4	100	100
maker-scaffold10x_1749_pilon-snap-gene-0.9-mRNA-1_transcript=maker-scaffold10x_1749_pilon-snap-gene-0.9-mRNA-1_gene=maker-scaffold10x_1749_pilon-snap-gene-0.9	A0A2H1BYE7|A0A2H1BYE7_FASHE_Ribosomal_protein_OS=Fasciola_hepatica_OX=6192_GN=D915_12952_PE=3_SV=1	A0A2H1BYE7	76.1	5.3e-48	199.1	100	77.9
maker-scaffold10x_313_pilon-snap-gene-0.80-mRNA-1_transcript=maker-scaffold10x_313_pilon-snap-gene-0.80-mRNA-1_gene=maker-scaffold10x_313_pilon-snap-gene-0.80	A0A2H1BYF2|A0A2H1BYF2_FASHE_Tubulin_alpha_chain_OS=Fasciola_hepatica_OX=6192_GN=D915_008616_PE=3_SV=1	A0A2H1BYF2	99.4	8.7e-98	365.5	82.7	39.2
maker-scaffold10x_43_pilon-snap-gene-0.79-mRNA-1_transcript=maker-scaffold10x_43_pilon-snap-gene-0.79-mRNA-1_gene=maker-scaffold10x_43_pilon-snap-gene-0.79	A0A2H1BYF8|A0A2H1BYF8_FASHE_EF_hand_(Fragment)_OS=Fasciola_hepatica_OX=6192_GN=D915_12942_PE=4_SV=1	A0A2H1BYF8	98	2.3e-73	283.9	100	91.6
maker-scaffold10x_498_pilon-pred_gff_StringTie-gene-0.32-mRNA-1_transcript=maker-scaffold10x_498_pilon-pred_gff_StringTie-gene-0.32-mRNA-1_gene=maker-scaffold10x_498_pilon-pred_gff_StringTie-gene-0.32	A0A2H1BYH7|A0A2H1BYH7_FASHE_Cytidine_deaminase_OS=Fasciola_hepatica_OX=6192_GN=D915_008390_PE=3_SV=1	A0A2H1BYH7	100	2.1e-64	254.2	90.4	100
maker-scaffold10x_342_pilon-snap-gene-0.61-mRNA-1_transcript=maker-scaffold10x_342_pilon-snap-gene-0.61-mRNA-1_gene=maker-scaffold10x_342_pilon-snap-gene-0.61	A0A2H1BYH8|A0A2H1BYH8_FASHE_Ribosomal_protein_L10_OS=Fasciola_hepatica_OX=6192_GN=D915_12917_PE=4_SV=1	A0A2H1BYH8	100	1.1e-142	515	100	100
maker-scaffold10x_886_pilon-snap-gene-0.7-mRNA-1_transcript=maker-scaffold10x_886_pilon-snap-gene-0.7-mRNA-1_gene=maker-scaffold10x_886_pilon-snap-gene-0.7	A0A2H1BYI8|A0A2H1BYI8_FASHE_Zinc_finger,_C2H2_type_OS=Fasciola_hepatica_OX=6192_GN=D915_12910_PE=4_SV=1	A0A2H1BYI8	86.1	4.4e-89	336.7	98.6	29.8
maker-scaffold10x_203_pilon-snap-gene-0.68-mRNA-1_transcript=maker-scaffold10x_203_pilon-snap-gene-0.68-mRNA-1_gene=maker-scaffold10x_203_pilon-snap-gene-0.68	A0A2H1BYN4|A0A2H1BYN4_FASHE_MYND_finger_OS=Fasciola_hepatica_OX=6192_GN=D915_12858_PE=4_SV=1	A0A2H1BYN4	100	0	2366.7	100	100
maker-scaffold10x_1561_pilon-snap-gene-0.28-mRNA-1_transcript=maker-scaffold10x_1561_pilon-snap-gene-0.28-mRNA-1_gene=maker-scaffold10x_1561_pilon-snap-gene-0.28	A0A2H1BYN6|A0A2H1BYN6_FASHE_Coiled-coil-helix-coiled-coil-helix_domain-containing_protein_1_OS=Fasciola_hepatica_OX=6192_GN=D915_008506_PE=4_SV=1	A0A2H1BYN6	100	4.4e-68	266.2	100	100
maker-scaffold10x_1017_pilon-augustus-gene-0.48-mRNA-1_transcript=maker-scaffold10x_1017_pilon-augustus-gene-0.48-mRNA-1_gene=maker-scaffold10x_1017_pilon-augustus-gene-0.48	A0A2H1BYN7|A0A2H1BYN7_FASHE_F5/8_type_C_domain-containing_protein_(Fragment)_OS=Fasciola_hepatica_OX=6192_GN=D915_12847_PE=4_SV=1	A0A2H1BYN7	48.7	1.3e-75	292.7	82.4	22.4
maker-scaffold10x_99_pilon-snap-gene-0.74-mRNA-1_transcript=maker-scaffold10x_99_pilon-snap-gene-0.74-mRNA-1_gene=maker-scaffold10x_99_pilon-snap-gene-0.74	A0A2H1BYP6|A0A2H1BYP6_FASHE_PDZ_domain-containing_protein_OS=Fasciola_hepatica_OX=6192_GN=D915_008519_PE=4_SV=1	A0A2H1BYP6	91.3	2.2e-255	890.2	100	100
maker-scaffold10x_92_pilon-snap-gene-0.34-mRNA-1_transcript=maker-scaffold10x_92_pilon-snap-gene-0.34-mRNA-1_gene=maker-scaffold10x_92_pilon-snap-gene-0.34	A0A2H1BYW2|A0A2H1BYW2_FASHE_GPN-loop_GTPase_OS=Fasciola_hepatica_OX=6192_GN=D915_008220_PE=3_SV=1	A0A2H1BYW2	100	1e-235	824.7	100	96.8
snap_masked-scaffold10x_2049_pilon-processed-gene-0.1-mRNA-1_transcript=snap_masked-scaffold10x_2049_pilon-processed-gene-0.1-mRNA-1_gene=snap_masked-scaffold10x_2049_pilon-processed-gene-0.1	A0A2H1BYX4|A0A2H1BYX4_FASHE_EF_hand_OS=Fasciola_hepatica_OX=6192_GN=D915_008321_PE=4_SV=1	A0A2H1BYX4	100	2.9e-117	430.3	100	100
augustus_masked-scaffold10x_71_pilon-processed-gene-0.137-mRNA-1_transcript=augustus_masked-scaffold10x_71_pilon-processed-gene-0.137-mRNA-1_gene=augustus_masked-scaffold10x_71_pilon-processed-gene-0.137	A0A2H1BYZ2|A0A2H1BYZ2_FASHE_Ubiquitin_conjugating_enzyme_OS=Fasciola_hepatica_OX=6192_GN=D915_008536_PE=3_SV=1	A0A2H1BYZ2	100	3.9e-87	329.7	100	100
maker-scaffold10x_72_pilon-augustus-gene-0.2-mRNA-1_transcript=maker-scaffold10x_72_pilon-augustus-gene-0.2-mRNA-1_gene=maker-scaffold10x_72_pilon-augustus-gene-0.2	A0A2H1BZ16|A0A2H1BZ16_FASHE_Kunitz/Bovine_pancreatic_trypsin_inhibitor_domain_protein_OS=Fasciola_hepatica_OX=6192_GN=D915_12722_PE=4_SV=1	A0A2H1BZ16	100	4.3e-27	129	80.9	41
augustus_masked-scaffold10x_56_pilon-processed-gene-0.9-mRNA-1_transcript=augustus_masked-scaffold10x_56_pilon-processed-gene-0.9-mRNA-1_gene=augustus_masked-scaffold10x_56_pilon-processed-gene-0.9	A0A2H1BZ21|A0A2H1BZ21_FASHE_Growth_arrest_and_DNA_damage-inducible_proteins-interacting_protein_1_OS=Fasciola_hepatica_OX=6192_GN=D915_008469_PE=4_SV=1	A0A2H1BZ21	98.1	9.7e-76	292	91.2	63.7
maker-scaffold10x_1500_pilon-snap-gene-0.76-mRNA-1_transcript=maker-scaffold10x_1500_pilon-snap-gene-0.76-mRNA-1_gene=maker-scaffold10x_1500_pilon-snap-gene-0.76	A0A2H1BZ67|A0A2H1BZ67_FASHE_Heterogeneous_nuclear_ribonucleoprotein_A2_OS=Fasciola_hepatica_OX=6192_GN=D915_009015_PE=4_SV=1	A0A2H1BZ67	100	7.1e-159	568.9	100	100
maker-scaffold10x_340_pilon-snap-gene-0.36-mRNA-1_transcript=maker-scaffold10x_340_pilon-snap-gene-0.36-mRNA-1_gene=maker-scaffold10x_340_pilon-snap-gene-0.36	A0A2H1BZ68|A0A2H1BZ68_FASHE_Putative_cell_division_control_protein_48_OS=Fasciola_hepatica_OX=6192_GN=D915_12667_PE=3_SV=1	A0A2H1BZ68	100	0	1170.6	100	96.6
maker-scaffold10x_1184_pilon-snap-gene-0.31-mRNA-1_transcript=maker-scaffold10x_1184_pilon-snap-gene-0.31-mRNA-1_gene=maker-scaffold10x_1184_pilon-snap-gene-0.31	A0A2H1BZ78|A0A2H1BZ78_FASHE_Glutathione_S-transferase_protein_(Fragment)_OS=Fasciola_hepatica_OX=6192_GN=D915_12658_PE=4_SV=1	A0A2H1BZ78	62.1	1.2e-101	379.4	71	92.9
maker-scaffold10x_2285_pilon-snap-gene-0.13-mRNA-1_transcript=maker-scaffold10x_2285_pilon-snap-gene-0.13-mRNA-1_gene=maker-scaffold10x_2285_pilon-snap-gene-0.13	A0A2H1BZ78|A0A2H1BZ78_FASHE_Glutathione_S-transferase_protein_(Fragment)_OS=Fasciola_hepatica_OX=6192_GN=D915_12658_PE=4_SV=1	A0A2H1BZ78	92.9	2e-104	387.5	97	74.1
maker-scaffold10x_1428_pilon-augustus-gene-0.20-mRNA-1_transcript=maker-scaffold10x_1428_pilon-augustus-gene-0.20-mRNA-1_gene=maker-scaffold10x_1428_pilon-augustus-gene-0.20	A0A2H1BZC5|A0A2H1BZC5_FASHE_Apoptosis_regulator_protein,_Bcl-2_family_(Fragment)_OS=Fasciola_hepatica_OX=6192_GN=D915_12598_PE=4_SV=1	A0A2H1BZC5	98.9	9.1e-241	842	74	94.4
maker-scaffold10x_118_pilon-snap-gene-0.28-mRNA-1_transcript=maker-scaffold10x_118_pilon-snap-gene-0.28-mRNA-1_gene=maker-scaffold10x_118_pilon-snap-gene-0.28	A0A2H1BZH3|A0A2H1BZH3_FASHE_Thymidylate_kinase_251L_OS=Fasciola_hepatica_OX=6192_GN=D915_008813_PE=4_SV=1	A0A2H1BZH3	99.5	0	1219.9	71.4	99.5
maker-scaffold10x_476_pilon-snap-gene-0.106-mRNA-1_transcript=maker-scaffold10x_476_pilon-snap-gene-0.106-mRNA-1_gene=maker-scaffold10x_476_pilon-snap-gene-0.106	A0A2H1BZJ2|A0A2H1BZJ2_FASHE_Large_subunit_ribosomal_protein_27a_OS=Fasciola_hepatica_OX=6192_GN=D915_008316_PE=3_SV=1	A0A2H1BZJ2	100	7e-70	272.3	100	100
maker-scaffold10x_1420_pilon-snap-gene-0.45-mRNA-1_transcript=maker-scaffold10x_1420_pilon-snap-gene-0.45-mRNA-1_gene=maker-scaffold10x_1420_pilon-snap-gene-0.45	A0A2H1BZK2|A0A2H1BZK2_FASHE_SAC3/GANP_family_protein_OS=Fasciola_hepatica_OX=6192_GN=D915_12538_PE=4_SV=1	A0A2H1BZK2	100	7.3e-150	538.9	100	51.4
maker-scaffold10x_602_pilon-snap-gene-0.46-mRNA-1_transcript=maker-scaffold10x_602_pilon-snap-gene-0.46-mRNA-1_gene=maker-scaffold10x_602_pilon-snap-gene-0.46	A0A2H1BZN0|A0A2H1BZN0_FASHE_Putative_e3_ubiquitin_ligase_ixodes_scapularis_e3_ubiquitin_ligase_OS=Fasciola_hepatica_OX=6192_GN=D915_007813_PE=4_SV=1	A0A2H1BZN0	100	2.6e-118	433.7	100	100
maker-scaffold10x_217_pilon-snap-gene-1.126-mRNA-1_transcript=maker-scaffold10x_217_pilon-snap-gene-1.126-mRNA-1_gene=maker-scaffold10x_217_pilon-snap-gene-1.126	A0A2H1BZV1|A0A2H1BZV1_FASHE_DDE_Tnp_IS1595_domain-containing_protein_OS=Fasciola_hepatica_OX=6192_GN=D915_13083_PE=4_SV=1	A0A2H1BZV1	29.9	1.6e-34	156	92.3	67.6
maker-scaffold10x_943_pilon-augustus-gene-0.47-mRNA-1_transcript=maker-scaffold10x_943_pilon-augustus-gene-0.47-mRNA-1_gene=maker-scaffold10x_943_pilon-augustus-gene-0.47	A0A2H1BZY0|A0A2H1BZY0_FASHE_Phosphoserine_phosphatase_SerB_OS=Fasciola_hepatica_OX=6192_GN=D915_008338_PE=4_SV=1	A0A2H1BZY0	60.8	5.8e-61	242.7	100	100
maker-scaffold10x_1549_pilon-augustus-gene-0.49-mRNA-1_transcript=maker-scaffold10x_1549_pilon-augustus-gene-0.49-mRNA-1_gene=maker-scaffold10x_1549_pilon-augustus-gene-0.49	A0A2H1C006|A0A2H1C006_FASHE_Gelsolin_repeat_protein_OS=Fasciola_hepatica_OX=6192_GN=D915_008120_PE=4_SV=1	A0A2H1C006	100	2.3e-218	766.9	100	100
maker-scaffold10x_93_pilon-snap-gene-0.130-mRNA-1_transcript=maker-scaffold10x_93_pilon-snap-gene-0.130-mRNA-1_gene=maker-scaffold10x_93_pilon-snap-gene-0.130	A0A2H1C015|A0A2H1C015_FASHE_Leucine_Rich_repeat-containing_domain_protein_OS=Fasciola_hepatica_OX=6192_GN=D915_12366_PE=4_SV=1	A0A2H1C015	100	1.7e-72	282	48.1	85.5
maker-scaffold10x_1359_pilon-snap-gene-0.6-mRNA-1_transcript=maker-scaffold10x_1359_pilon-snap-gene-0.6-mRNA-1_gene=maker-scaffold10x_1359_pilon-snap-gene-0.6	A0A2H1C055|A0A2H1C055_FASHE_Zinc_finger,_C3HC4_type_OS=Fasciola_hepatica_OX=6192_GN=D915_12329_PE=4_SV=1	A0A2H1C055	99	1.3e-168	601.7	75.3	94.5
maker-scaffold10x_1561_pilon-snap-gene-0.22-mRNA-1_transcript=maker-scaffold10x_1561_pilon-snap-gene-0.22-mRNA-1_gene=maker-scaffold10x_1561_pilon-snap-gene-0.22	A0A2H1C069|A0A2H1C069_FASHE_PX_domain-containing_protein_(Fragment)_OS=Fasciola_hepatica_OX=6192_GN=D915_12288_PE=4_SV=1	A0A2H1C069	100	8e-38	164.9	100	100
maker-scaffold10x_338_pilon-pred_gff_StringTie-gene-0.15-mRNA-1_transcript=maker-scaffold10x_338_pilon-pred_gff_StringTie-gene-0.15-mRNA-1_gene=maker-scaffold10x_338_pilon-pred_gff_StringTie-gene-0.15	A0A2H1C072|A0A2H1C072_FASHE_Dynein_light_chain_OS=Fasciola_hepatica_OX=6192_GN=D915_008269_PE=3_SV=1	A0A2H1C072	98.4	8.2e-28	131.3	98.4	66.3
maker-scaffold10x_1184_pilon-snap-gene-0.30-mRNA-1_transcript=maker-scaffold10x_1184_pilon-snap-gene-0.30-mRNA-1_gene=maker-scaffold10x_1184_pilon-snap-gene-0.30	A0A2H1C079|A0A2H1C079_FASHE_TPR_REGION_domain-containing_protein_OS=Fasciola_hepatica_OX=6192_GN=D915_008527_PE=4_SV=1	A0A2H1C079	74.1	1e-88	335.5	100	100
maker-scaffold10x_1184_pilon-snap-gene-0.32-mRNA-1_transcript=maker-scaffold10x_1184_pilon-snap-gene-0.32-mRNA-1_gene=maker-scaffold10x_1184_pilon-snap-gene-0.32	A0A2H1C079|A0A2H1C079_FASHE_TPR_REGION_domain-containing_protein_OS=Fasciola_hepatica_OX=6192_GN=D915_008527_PE=4_SV=1	A0A2H1C079	80.7	2.1e-16	94.4	47.1	25
maker-scaffold10x_548_pilon-snap-gene-0.12-mRNA-1_transcript=maker-scaffold10x_548_pilon-snap-gene-0.12-mRNA-1_gene=maker-scaffold10x_548_pilon-snap-gene-0.12	A0A2H1C089|A0A2H1C089_FASHE_GTP-binding_nuclear_protein_OS=Fasciola_hepatica_OX=6192_GN=D915_12289_PE=3_SV=1	A0A2H1C089	100	1e-122	448.4	100	100
maker-scaffold10x_958_pilon-snap-gene-0.47-mRNA-1_transcript=maker-scaffold10x_958_pilon-snap-gene-0.47-mRNA-1_gene=maker-scaffold10x_958_pilon-snap-gene-0.47	A0A2H1C092|A0A2H1C092_FASHE_Acidic_leucine-rich_nuclear_phosphoprotein_32_protein_(ANP32/acidic_nuclear_phosphoprotein)_OS=Fasciola_hepatica_OX=6192_GN=D915_008153_PE=4_SV=1	A0A2H1C092	100	1.3e-99	372.1	100	100
maker-scaffold10x_498_pilon-snap-gene-0.9-mRNA-1_transcript=maker-scaffold10x_498_pilon-snap-gene-0.9-mRNA-1_gene=maker-scaffold10x_498_pilon-snap-gene-0.9	A0A2H1C0A3|A0A2H1C0A3_FASHE_3'_exoribonuclease_family,_domain_1_OS=Fasciola_hepatica_OX=6192_GN=D915_008415_PE=4_SV=1	A0A2H1C0A3	99.7	6.2e-177	629	100	100
maker-scaffold10x_113_pilon-snap-gene-0.197-mRNA-1_transcript=maker-scaffold10x_113_pilon-snap-gene-0.197-mRNA-1_gene=maker-scaffold10x_113_pilon-snap-gene-0.197	A0A2H1C0D4|A0A2H1C0D4_FASHE_Mitochondrial_ribosomal_protein_S24_OS=Fasciola_hepatica_OX=6192_GN=D915_008441_PE=4_SV=1	A0A2H1C0D4	100	6.3e-82	312.8	80.1	98.8
maker-scaffold10x_493_pilon-pred_gff_StringTie-gene-1.48-mRNA-1_transcript=maker-scaffold10x_493_pilon-pred_gff_StringTie-gene-1.48-mRNA-1_gene=maker-scaffold10x_493_pilon-pred_gff_StringTie-gene-1.48	A0A2H1C0F0|A0A2H1C0F0_FASHE_Ceramide_glucosyltransferase_OS=Fasciola_hepatica_OX=6192_GN=D915_007915_PE=4_SV=1	A0A2H1C0F0	99.8	0	1146.3	100	100
maker-scaffold10x_302_pilon-pred_gff_StringTie-gene-0.65-mRNA-1_transcript=maker-scaffold10x_302_pilon-pred_gff_StringTie-gene-0.65-mRNA-1_gene=maker-scaffold10x_302_pilon-pred_gff_StringTie-gene-0.65	A0A2H1C0G1|A0A2H1C0G1_FASHE_Universal_stress_family_protein_OS=Fasciola_hepatica_OX=6192_GN=D915_008003_PE=4_SV=1	A0A2H1C0G1	98.8	4.9e-85	322.8	100	100
maker-scaffold10x_909_pilon-augustus-gene-0.40-mRNA-1_transcript=maker-scaffold10x_909_pilon-augustus-gene-0.40-mRNA-1_gene=maker-scaffold10x_909_pilon-augustus-gene-0.40	A0A2H1C0I1|A0A2H1C0I1_FASHE_Peptidyl-prolyl_cis-trans_isomerase_OS=Fasciola_hepatica_OX=6192_GN=D915_008587_PE=4_SV=1	A0A2H1C0I1	57.2	2.4e-33	150.2	100	100
maker-scaffold10x_599_pilon-augustus-gene-0.13-mRNA-1_transcript=maker-scaffold10x_599_pilon-augustus-gene-0.13-mRNA-1_gene=maker-scaffold10x_599_pilon-augustus-gene-0.13	A0A2H1C0I5|A0A2H1C0I5_FASHE_TYR_PHOSPHATASE_2_domain-containing_protein_OS=Fasciola_hepatica_OX=6192_GN=D915_12185_PE=4_SV=1	A0A2H1C0I5	100	1.1e-92	348.2	100	74.3
maker-scaffold10x_1859_pilon-snap-gene-0.51-mRNA-1_transcript=maker-scaffold10x_1859_pilon-snap-gene-0.51-mRNA-1_gene=maker-scaffold10x_1859_pilon-snap-gene-0.51	A0A2H1C0I8|A0A2H1C0I8_FASHE_40S_ribosomal_protein_S6_OS=Fasciola_hepatica_OX=6192_GN=D915_008139_PE=3_SV=1	A0A2H1C0I8	99.6	1.6e-127	464.5	100	100
maker-scaffold10x_1_pilon-augustus-gene-0.130-mRNA-1_transcript=maker-scaffold10x_1_pilon-augustus-gene-0.130-mRNA-1_gene=maker-scaffold10x_1_pilon-augustus-gene-0.130	A0A2H1C0J9|A0A2H1C0J9_FASHE_Leishmanolysin-like_peptidase_(Fragment)_OS=Fasciola_hepatica_OX=6192_GN=D915_12167_PE=3_SV=1	A0A2H1C0J9	97	5.3e-53	216.1	75.9	30
maker-scaffold10x_500_pilon-augustus-gene-0.90-mRNA-1_transcript=maker-scaffold10x_500_pilon-augustus-gene-0.90-mRNA-1_gene=maker-scaffold10x_500_pilon-augustus-gene-0.90	A0A2H1C0Q3|A0A2H1C0Q3_FASHE_Lectin_C-type_domain_protein_OS=Fasciola_hepatica_OX=6192_GN=D915_12108_PE=4_SV=1	A0A2H1C0Q3	71.7	1.1e-159	572	87.8	60.6
maker-scaffold10x_1030_pilon-snap-gene-0.2-mRNA-1_transcript=maker-scaffold10x_1030_pilon-snap-gene-0.2-mRNA-1_gene=maker-scaffold10x_1030_pilon-snap-gene-0.2	A0A2H1C0U0|A0A2H1C0U0_FASHE_START_domain_protein_(Fragment)_OS=Fasciola_hepatica_OX=6192_GN=D915_12056_PE=4_SV=1	A0A2H1C0U0	93.9	7.1e-221	775.4	95.7	84
maker-scaffold10x_1041_pilon-snap-gene-0.8-mRNA-1_transcript=maker-scaffold10x_1041_pilon-snap-gene-0.8-mRNA-1_gene=maker-scaffold10x_1041_pilon-snap-gene-0.8	A0A2H1C0U2|A0A2H1C0U2_FASHE_U6_snRNA_phosphodiesterase_OS=Fasciola_hepatica_OX=6192_GN=D915_12043_PE=3_SV=1	A0A2H1C0U2	92.8	4.2e-130	473	100	100
maker-scaffold10x_345_pilon-snap-gene-1.93-mRNA-1_transcript=maker-scaffold10x_345_pilon-snap-gene-1.93-mRNA-1_gene=maker-scaffold10x_345_pilon-snap-gene-1.93	A0A2H1C0W2|A0A2H1C0W2_FASHE_MORN_repeat_protein_(Fragment)_OS=Fasciola_hepatica_OX=6192_GN=D915_12017_PE=4_SV=1	A0A2H1C0W2	72.7	8.8e-239	835.1	94.7	94.8
maker-scaffold10x_58_pilon-snap-gene-0.143-mRNA-1_transcript=maker-scaffold10x_58_pilon-snap-gene-0.143-mRNA-1_gene=maker-scaffold10x_58_pilon-snap-gene-0.143	A0A2H1C0X5|A0A2H1C0X5_FASHE_Serine/threonine-protein_phosphatase_4_regulatory_subunit_3_OS=Fasciola_hepatica_OX=6192_GN=D915_007901_PE=4_SV=1	A0A2H1C0X5	99.9	0	2020	100	100
maker-scaffold10x_80_pilon-snap-gene-0.182-mRNA-1_transcript=maker-scaffold10x_80_pilon-snap-gene-0.182-mRNA-1_gene=maker-scaffold10x_80_pilon-snap-gene-0.182	A0A2H1C0Y0|A0A2H1C0Y0_FASHE_Chaperonin_GroS_OS=Fasciola_hepatica_OX=6192_GN=D915_12025_PE=3_SV=1	A0A2H1C0Y0	100	1.1e-50	208	100	100
maker-scaffold10x_374_pilon-augustus-gene-0.32-mRNA-1_transcript=maker-scaffold10x_374_pilon-augustus-gene-0.32-mRNA-1_gene=maker-scaffold10x_374_pilon-augustus-gene-0.32	A0A2H1C105|A0A2H1C105_FASHE_GDP-Man:Man(3)GlcNAc(2)-PP-Dol_alpha-1_2-mannosyltransferase_OS=Fasciola_hepatica_OX=6192_GN=D915_008079_PE=4_SV=1	A0A2H1C105	100	4.8e-296	1025.4	100	100
augustus_masked-scaffold10x_471_pilon-processed-gene-0.3-mRNA-1_transcript=augustus_masked-scaffold10x_471_pilon-processed-gene-0.3-mRNA-1_gene=augustus_masked-scaffold10x_471_pilon-processed-gene-0.3	A0A2H1C110|A0A2H1C110_FASHE_RRM_domain-containing_protein_OS=Fasciola_hepatica_OX=6192_GN=D915_12723_PE=4_SV=1	A0A2H1C110	99.1	8.2e-226	792	100	100
maker-scaffold10x_157_pilon-pred_gff_StringTie-gene-0.138-mRNA-1_transcript=maker-scaffold10x_157_pilon-pred_gff_StringTie-gene-0.138-mRNA-1_gene=maker-scaffold10x_157_pilon-pred_gff_StringTie-gene-0.138	A0A2H1C120|A0A2H1C120_FASHE_Transporter,_major_facilitator_family_protein_OS=Fasciola_hepatica_OX=6192_GN=D915_12641_PE=4_SV=1	A0A2H1C120	99.8	9.9e-267	927.9	100	100
maker-scaffold10x_45_pilon-snap-gene-0.46-mRNA-1_transcript=maker-scaffold10x_45_pilon-snap-gene-0.46-mRNA-1_gene=maker-scaffold10x_45_pilon-snap-gene-0.46	A0A2H1C128|A0A2H1C128_FASHE_PRKCSH_1_domain-containing_protein_(Fragment)_OS=Fasciola_hepatica_OX=6192_GN=D915_12635_PE=4_SV=1	A0A2H1C128	97.9	9.3e-151	542	98.3	100
maker-scaffold10x_460_pilon-snap-gene-0.25-mRNA-1_transcript=maker-scaffold10x_460_pilon-snap-gene-0.25-mRNA-1_gene=maker-scaffold10x_460_pilon-snap-gene-0.25	A0A2H1C138|A0A2H1C138_FASHE_Dynein_light_chain_OS=Fasciola_hepatica_OX=6192_GN=D915_11934_PE=3_SV=1	A0A2H1C138	100	2.8e-45	189.9	100	100
maker-scaffold10x_460_pilon-pred_gff_StringTie-gene-0.10-mRNA-1_transcript=maker-scaffold10x_460_pilon-pred_gff_StringTie-gene-0.10-mRNA-1_gene=maker-scaffold10x_460_pilon-pred_gff_StringTie-gene-0.10	A0A2H1C148|A0A2H1C148_FASHE_Dynein_light_chain_OS=Fasciola_hepatica_OX=6192_GN=D915_11933_PE=3_SV=1	A0A2H1C148	100	8.7e-54	218.4	100	100
maker-scaffold10x_440_pilon-augustus-gene-0.15-mRNA-1_transcript=maker-scaffold10x_440_pilon-augustus-gene-0.15-mRNA-1_gene=maker-scaffold10x_440_pilon-augustus-gene-0.15	A0A2H1C152|A0A2H1C152_FASHE_Molybdopterin_molybdenumtransferase_OS=Fasciola_hepatica_OX=6192_GN=D915_11961_PE=3_SV=1	A0A2H1C152	99.8	0	1285	98.2	100
maker-scaffold10x_632_pilon-snap-gene-0.56-mRNA-1_transcript=maker-scaffold10x_632_pilon-snap-gene-0.56-mRNA-1_gene=maker-scaffold10x_632_pilon-snap-gene-0.56	A0A2H1C156|A0A2H1C156_FASHE_Activating_signal_cointegrator_1_complex_subunit_1_OS=Fasciola_hepatica_OX=6192_GN=D915_008058_PE=4_SV=1	A0A2H1C156	79.6	3.6e-209	737.3	67.3	100
maker-scaffold10x_936_pilon-snap-gene-0.65-mRNA-1_transcript=maker-scaffold10x_936_pilon-snap-gene-0.65-mRNA-1_gene=maker-scaffold10x_936_pilon-snap-gene-0.65	A0A2H1C173|A0A2H1C173_FASHE_EB1_C-terminal_domain-containing_protein_(Fragment)_OS=Fasciola_hepatica_OX=6192_GN=D915_11940_PE=4_SV=1	A0A2H1C173	91	1.5e-43	185.7	39.7	59.2
maker-scaffold10x_1458_pilon-snap-gene-0.33-mRNA-1_transcript=maker-scaffold10x_1458_pilon-snap-gene-0.33-mRNA-1_gene=maker-scaffold10x_1458_pilon-snap-gene-0.33	A0A2H1C197|A0A2H1C197_FASHE_BZIP_transcription_factor_OS=Fasciola_hepatica_OX=6192_GN=D915_007996_PE=4_SV=1	A0A2H1C197	99.9	0	1538.9	99.3	100
maker-scaffold10x_703_pilon-snap-gene-0.98-mRNA-1_transcript=maker-scaffold10x_703_pilon-snap-gene-0.98-mRNA-1_gene=maker-scaffold10x_703_pilon-snap-gene-0.98	A0A2H1C1D3|A0A2H1C1D3_FASHE_ZZ-type_domain-containing_protein_OS=Fasciola_hepatica_OX=6192_GN=D915_12526_PE=4_SV=1	A0A2H1C1D3	100	2e-161	577.4	96.7	96.7
maker-scaffold10x_102_pilon-snap-gene-0.40-mRNA-1_transcript=maker-scaffold10x_102_pilon-snap-gene-0.40-mRNA-1_gene=maker-scaffold10x_102_pilon-snap-gene-0.40	A0A2H1C1D8|A0A2H1C1D8_FASHE_Ribosomal_protein_S27a_OS=Fasciola_hepatica_OX=6192_GN=D915_008484_PE=4_SV=1	A0A2H1C1D8	100	2.8e-79	303.5	100	100
maker-scaffold10x_954_pilon-pred_gff_StringTie-gene-0.15-mRNA-1_transcript=maker-scaffold10x_954_pilon-pred_gff_StringTie-gene-0.15-mRNA-1_gene=maker-scaffold10x_954_pilon-pred_gff_StringTie-gene-0.15	A0A2H1C1D9|A0A2H1C1D9_FASHE_Zinc_finger_protein_OS=Fasciola_hepatica_OX=6192_GN=D915_007999_PE=4_SV=1	A0A2H1C1D9	99.9	0	2260.7	100	100
maker-scaffold10x_1146_pilon-snap-gene-0.0-mRNA-1_transcript=maker-scaffold10x_1146_pilon-snap-gene-0.0-mRNA-1_gene=maker-scaffold10x_1146_pilon-snap-gene-0.0	A0A2H1C1E6|A0A2H1C1E6_FASHE_NICE-3_protein_OS=Fasciola_hepatica_OX=6192_GN=D915_12578_PE=4_SV=1	A0A2H1C1E6	100	1.3e-92	348.2	92	99.5
maker-scaffold10x_1349_pilon-snap-gene-0.15-mRNA-1_transcript=maker-scaffold10x_1349_pilon-snap-gene-0.15-mRNA-1_gene=maker-scaffold10x_1349_pilon-snap-gene-0.15	A0A2H1C1F2|A0A2H1C1F2_FASHE_Synaptophysin_/_synaptoporin_OS=Fasciola_hepatica_OX=6192_GN=D915_11841_PE=4_SV=1	A0A2H1C1F2	89.6	4.4e-126	459.9	87.5	99.2
maker-scaffold10x_469_pilon-snap-gene-0.87-mRNA-1_transcript=maker-scaffold10x_469_pilon-snap-gene-0.87-mRNA-1_gene=maker-scaffold10x_469_pilon-snap-gene-0.87	A0A2H1C1G0|A0A2H1C1G0_FASHE_Putative_transcription_factor_LCR-F1_OS=Fasciola_hepatica_OX=6192_GN=D915_007685_PE=3_SV=1	A0A2H1C1G0	96.8	0	1297.7	100	100
maker-scaffold10x_483_pilon-snap-gene-0.119-mRNA-1_transcript=maker-scaffold10x_483_pilon-snap-gene-0.119-mRNA-1_gene=maker-scaffold10x_483_pilon-snap-gene-0.119	A0A2H1C1G7|A0A2H1C1G7_FASHE_Ankyrin_repeat_protein_OS=Fasciola_hepatica_OX=6192_GN=D915_12487_PE=4_SV=1	A0A2H1C1G7	100	2.1e-67	263.8	100	100
maker-scaffold10x_22_pilon-snap-gene-0.116-mRNA-1_transcript=maker-scaffold10x_22_pilon-snap-gene-0.116-mRNA-1_gene=maker-scaffold10x_22_pilon-snap-gene-0.116	A0A2H1C1H1|A0A2H1C1H1_FASHE_Serine/arginine-rich_splicing_factor_OS=Fasciola_hepatica_OX=6192_GN=D915_007541_PE=4_SV=1	A0A2H1C1H1	100	7.4e-75	288.9	100	100
maker-scaffold10x_591_pilon-snap-gene-0.8-mRNA-1_transcript=maker-scaffold10x_591_pilon-snap-gene-0.8-mRNA-1_gene=maker-scaffold10x_591_pilon-snap-gene-0.8	A0A2H1C1H2|A0A2H1C1H2_FASHE_Chromo'_(CHRromatin_Organization_MOdifier)_domain_protein_OS=Fasciola_hepatica_OX=6192_GN=D915_11793_PE=4_SV=1	A0A2H1C1H2	100	3.8e-214	753.1	91	98.5
maker-scaffold10x_591_pilon-snap-gene-0.10-mRNA-1_transcript=maker-scaffold10x_591_pilon-snap-gene-0.10-mRNA-1_gene=maker-scaffold10x_591_pilon-snap-gene-0.10	A0A2H1C1H9|A0A2H1C1H9_FASHE_Ankyrin_repeat_protein_OS=Fasciola_hepatica_OX=6192_GN=D915_11792_PE=4_SV=1	A0A2H1C1H9	99.5	0	1206	100	100
maker-scaffold10x_73_pilon-pred_gff_StringTie-gene-0.81-mRNA-1_transcript=maker-scaffold10x_73_pilon-pred_gff_StringTie-gene-0.81-mRNA-1_gene=maker-scaffold10x_73_pilon-pred_gff_StringTie-gene-0.81	A0A2H1C1I0|A0A2H1C1I0_FASHE_Nuclear_envelope_phosphatase-regulatory_subunit_1_OS=Fasciola_hepatica_OX=6192_GN=D915_008077_PE=4_SV=1	A0A2H1C1I0	100	6.8e-60	238.8	100	100
maker-scaffold10x_275_pilon-snap-gene-0.25-mRNA-1_transcript=maker-scaffold10x_275_pilon-snap-gene-0.25-mRNA-1_gene=maker-scaffold10x_275_pilon-snap-gene-0.25	A0A2H1C1K7|A0A2H1C1K7_FASHE_Ribosomal_Proteins_L2,_RNA_binding_domain_protein_OS=Fasciola_hepatica_OX=6192_GN=D915_007487_PE=3_SV=1	A0A2H1C1K7	100	4.7e-146	526.2	100	100
snap_masked-scaffold10x_1115_pilon-processed-gene-0.87-mRNA-1_transcript=snap_masked-scaffold10x_1115_pilon-processed-gene-0.87-mRNA-1_gene=snap_masked-scaffold10x_1115_pilon-processed-gene-0.87	A0A2H1C1L6|A0A2H1C1L6_FASHE_Sodium_/_potassium_ATPase_beta_chain_OS=Fasciola_hepatica_OX=6192_GN=D915_008376_PE=4_SV=1	A0A2H1C1L6	100	9.8e-183	648.3	100	100
maker-scaffold10x_654_pilon-snap-gene-0.147-mRNA-1_transcript=maker-scaffold10x_654_pilon-snap-gene-0.147-mRNA-1_gene=maker-scaffold10x_654_pilon-snap-gene-0.147	A0A2H1C1L7|A0A2H1C1L7_FASHE_SURF6_domain-containing_protein_OS=Fasciola_hepatica_OX=6192_GN=D915_007170_PE=4_SV=1	A0A2H1C1L7	100	5.7e-62	246.1	100	100
maker-scaffold10x_2638_pilon-snap-gene-0.29-mRNA-1_transcript=maker-scaffold10x_2638_pilon-snap-gene-0.29-mRNA-1_gene=maker-scaffold10x_2638_pilon-snap-gene-0.29	A0A2H1C1M4|A0A2H1C1M4_FASHE_Cytoplasmic_tRNA_2-thiolation_protein_1_OS=Fasciola_hepatica_OX=6192_GN=D915_11771_PE=3_SV=1	A0A2H1C1M4	99.3	4.4e-77	296.6	73.8	33.6
maker-scaffold10x_238_pilon-augustus-gene-0.67-mRNA-1_transcript=maker-scaffold10x_238_pilon-augustus-gene-0.67-mRNA-1_gene=maker-scaffold10x_238_pilon-augustus-gene-0.67	A0A2H1C1N4|A0A2H1C1N4_FASHE_8-oxoguanine_DNA-glycosylase_OS=Fasciola_hepatica_OX=6192_GN=D915_11760_PE=4_SV=1	A0A2H1C1N4	100	8.5e-64	251.9	96.2	47.2
maker-scaffold10x_563_pilon-snap-gene-0.104-mRNA-1_transcript=maker-scaffold10x_563_pilon-snap-gene-0.104-mRNA-1_gene=maker-scaffold10x_563_pilon-snap-gene-0.104	A0A2H1C1N8|A0A2H1C1N8_FASHE_SNF7_family_protein_OS=Fasciola_hepatica_OX=6192_GN=D915_11725_PE=4_SV=1	A0A2H1C1N8	99.5	1e-106	395.2	100	100
maker-scaffold10x_275_pilon-snap-gene-0.17-mRNA-1_transcript=maker-scaffold10x_275_pilon-snap-gene-0.17-mRNA-1_gene=maker-scaffold10x_275_pilon-snap-gene-0.17	A0A2H1C1P3|A0A2H1C1P3_FASHE_Dec-1_repeat_protein_OS=Fasciola_hepatica_OX=6192_GN=D915_11758_PE=4_SV=1	A0A2H1C1P3	98.1	3.1e-137	498	45.4	96.8
maker-scaffold10x_1058_pilon-snap-gene-0.13-mRNA-1_transcript=maker-scaffold10x_1058_pilon-snap-gene-0.13-mRNA-1_gene=maker-scaffold10x_1058_pilon-snap-gene-0.13	A0A2H1C1P4|A0A2H1C1P4_FASHE_Eukaryotic_ribosomal_protein_L18_OS=Fasciola_hepatica_OX=6192_GN=D915_007937_PE=4_SV=1	A0A2H1C1P4	100	2.4e-99	370.5	100	100
maker-scaffold10x_362_pilon-augustus-gene-0.55-mRNA-1_transcript=maker-scaffold10x_362_pilon-augustus-gene-0.55-mRNA-1_gene=maker-scaffold10x_362_pilon-augustus-gene-0.55	A0A2H1C1P9|A0A2H1C1P9_FASHE_Phospholipase_A2_OS=Fasciola_hepatica_OX=6192_GN=D915_11709_PE=3_SV=1	A0A2H1C1P9	99.6	3.2e-165	590.1	91.3	99
augustus_masked-scaffold10x_457_pilon-processed-gene-0.38-mRNA-1_transcript=augustus_masked-scaffold10x_457_pilon-processed-gene-0.38-mRNA-1_gene=augustus_masked-scaffold10x_457_pilon-processed-gene-0.38	A0A2H1C1S1|A0A2H1C1S1_FASHE_Kinase_domain_protein_OS=Fasciola_hepatica_OX=6192_GN=D915_007838_PE=3_SV=1	A0A2H1C1S1	99.6	3.5e-152	546.6	100	60.1
snap_masked-scaffold10x_362_pilon-processed-gene-0.44-mRNA-1_transcript=snap_masked-scaffold10x_362_pilon-processed-gene-0.44-mRNA-1_gene=snap_masked-scaffold10x_362_pilon-processed-gene-0.44	A0A2H1C1T4|A0A2H1C1T4_FASHE_Putative_drug_transporter_OS=Fasciola_hepatica_OX=6192_GN=D915_007900_PE=4_SV=1	A0A2H1C1T4	100	3.8e-293	1015.8	100	100
snap_masked-scaffold10x_1684_pilon-processed-gene-0.3-mRNA-1_transcript=snap_masked-scaffold10x_1684_pilon-processed-gene-0.3-mRNA-1_gene=snap_masked-scaffold10x_1684_pilon-processed-gene-0.3	A0A2H1C1T5|A0A2H1C1T5_FASHE_DUF4537_domain-containing_protein_OS=Fasciola_hepatica_OX=6192_GN=D915_12430_PE=4_SV=1	A0A2H1C1T5	99.5	3.6e-121	443.4	90.3	99.1
maker-scaffold10x_815_pilon-pred_gff_StringTie-gene-1.186-mRNA-1_transcript=maker-scaffold10x_815_pilon-pred_gff_StringTie-gene-1.186-mRNA-1_gene=maker-scaffold10x_815_pilon-pred_gff_StringTie-gene-1.186	A0A2H1C1U3|A0A2H1C1U3_FASHE_Ribosomal_protein_L14_OS=Fasciola_hepatica_OX=6192_GN=D915_11702_PE=4_SV=1	A0A2H1C1U3	100	3.1e-75	290	100	100
augustus_masked-scaffold10x_781_pilon-processed-gene-0.79-mRNA-1_transcript=augustus_masked-scaffold10x_781_pilon-processed-gene-0.79-mRNA-1_gene=augustus_masked-scaffold10x_781_pilon-processed-gene-0.79	A0A2H1C1V3|A0A2H1C1V3_FASHE_Sodium/potassium-transporting_ATPase_subunit_alpha_OS=Fasciola_hepatica_OX=6192_GN=D915_008187_PE=3_SV=1	A0A2H1C1V3	100	0	1686	100	83.6
maker-scaffold10x_1761_pilon-snap-gene-0.39-mRNA-1_transcript=maker-scaffold10x_1761_pilon-snap-gene-0.39-mRNA-1_gene=maker-scaffold10x_1761_pilon-snap-gene-0.39	A0A2H1C1Y5|A0A2H1C1Y5_FASHE_Guanine_nucleotide-binding_protein_beta_subunit_OS=Fasciola_hepatica_OX=6192_GN=D915_007890_PE=4_SV=1	A0A2H1C1Y5	100	3.7e-169	603.2	100	100
maker-scaffold10x_922_pilon-snap-gene-0.62-mRNA-1_transcript=maker-scaffold10x_922_pilon-snap-gene-0.62-mRNA-1_gene=maker-scaffold10x_922_pilon-snap-gene-0.62	A0A2H1C1Z8|A0A2H1C1Z8_FASHE_Pre-mRNA_cleavage_complex_2_protein_Pcf11_OS=Fasciola_hepatica_OX=6192_GN=D915_008334_PE=4_SV=1	A0A2H1C1Z8	100	0	2001.5	100	100
maker-scaffold10x_44_pilon-snap-gene-0.7-mRNA-1_transcript=maker-scaffold10x_44_pilon-snap-gene-0.7-mRNA-1_gene=maker-scaffold10x_44_pilon-snap-gene-0.7	A0A2H1C244|A0A2H1C244_FASHE_V-type_proton_ATPase_subunit_G_OS=Fasciola_hepatica_OX=6192_GN=D915_11564_PE=3_SV=1	A0A2H1C244	100	3.6e-53	216.5	100	100
maker-scaffold10x_598_pilon-snap-gene-0.27-mRNA-1_transcript=maker-scaffold10x_598_pilon-snap-gene-0.27-mRNA-1_gene=maker-scaffold10x_598_pilon-snap-gene-0.27	A0A2H1C245|A0A2H1C245_FASHE_PAK1-interacting_protein_1_OS=Fasciola_hepatica_OX=6192_GN=D915_007183_PE=4_SV=1	A0A2H1C245	97.1	5.3e-212	745.7	100	94.8
maker-scaffold10x_263_pilon-augustus-gene-0.176-mRNA-1_transcript=maker-scaffold10x_263_pilon-augustus-gene-0.176-mRNA-1_gene=maker-scaffold10x_263_pilon-augustus-gene-0.176	A0A2H1C263|A0A2H1C263_FASHE_A-macroglobulin_receptor_OS=Fasciola_hepatica_OX=6192_GN=D915_11535_PE=4_SV=1	A0A2H1C263	99.1	1.5e-59	238	70.1	39.9
maker-scaffold10x_598_pilon-augustus-gene-0.10-mRNA-1_transcript=maker-scaffold10x_598_pilon-augustus-gene-0.10-mRNA-1_gene=maker-scaffold10x_598_pilon-augustus-gene-0.10	A0A2H1C268|A0A2H1C268_FASHE_Cyclic_nucleotide-binding_domain_protein_OS=Fasciola_hepatica_OX=6192_GN=D915_11548_PE=4_SV=1	A0A2H1C268	100	2.9e-18	99.8	66.7	18.1
maker-scaffold10x_487_pilon-augustus-gene-0.70-mRNA-1_transcript=maker-scaffold10x_487_pilon-augustus-gene-0.70-mRNA-1_gene=maker-scaffold10x_487_pilon-augustus-gene-0.70	A0A2H1C280|A0A2H1C280_FASHE_Ankyrin_repeat_protein_OS=Fasciola_hepatica_OX=6192_GN=D915_11507_PE=4_SV=1	A0A2H1C280	100	9.4e-176	625.9	56.1	94.9
maker-scaffold10x_1382_pilon-snap-gene-0.57-mRNA-1_transcript=maker-scaffold10x_1382_pilon-snap-gene-0.57-mRNA-1_gene=maker-scaffold10x_1382_pilon-snap-gene-0.57	A0A2H1C281|A0A2H1C281_FASHE_Papain_family_cysteine_protease_OS=Fasciola_hepatica_OX=6192_GN=D915_008045_PE=3_SV=1	A0A2H1C281	100	9.1e-136	492.3	70.9	66.1
maker-scaffold10x_1842_pilon-snap-gene-0.10-mRNA-1_transcript=maker-scaffold10x_1842_pilon-snap-gene-0.10-mRNA-1_gene=maker-scaffold10x_1842_pilon-snap-gene-0.10	A0A2H1C2B1|A0A2H1C2B1_FASHE_Septum_formation_protein_Maf_OS=Fasciola_hepatica_OX=6192_GN=D915_12186_PE=3_SV=1	A0A2H1C2B1	100	2.4e-113	417.2	100	100
augustus_masked-scaffold10x_173_pilon-processed-gene-0.59-mRNA-1_transcript=augustus_masked-scaffold10x_173_pilon-processed-gene-0.59-mRNA-1_gene=augustus_masked-scaffold10x_173_pilon-processed-gene-0.59	A0A2H1C2B4|A0A2H1C2B4_FASHE_Transcription_and_mRNA_export_factor_ENY2_OS=Fasciola_hepatica_OX=6192_GN=D915_007474_PE=3_SV=1	A0A2H1C2B4	100	1.3e-43	184.5	100	100
maker-scaffold10x_237_pilon-pred_gff_StringTie-gene-0.175-mRNA-1_transcript=maker-scaffold10x_237_pilon-pred_gff_StringTie-gene-0.175-mRNA-1_gene=maker-scaffold10x_237_pilon-pred_gff_StringTie-gene-0.175	A0A2H1C2B9|A0A2H1C2B9_FASHE_Cysteamine_dioxygenase_OS=Fasciola_hepatica_OX=6192_GN=D915_007245_PE=4_SV=1	A0A2H1C2B9	100	6.3e-188	665.6	100	100
maker-scaffold10x_57_pilon-snap-gene-0.27-mRNA-1_transcript=maker-scaffold10x_57_pilon-snap-gene-0.27-mRNA-1_gene=maker-scaffold10x_57_pilon-snap-gene-0.27	A0A2H1C2E3|A0A2H1C2E3_FASHE_Homocysteine_S-methyltransferase_OS=Fasciola_hepatica_OX=6192_GN=D915_007656_PE=4_SV=1	A0A2H1C2E3	100	3.1e-262	912.9	100	100
maker-scaffold10x_2484_pilon-snap-gene-0.6-mRNA-1_transcript=maker-scaffold10x_2484_pilon-snap-gene-0.6-mRNA-1_gene=maker-scaffold10x_2484_pilon-snap-gene-0.6	A0A2H1C2E6|A0A2H1C2E6_FASHE_Low-density_lipoprotein_receptor_domain_class_A_OS=Fasciola_hepatica_OX=6192_GN=D915_11469_PE=4_SV=1	A0A2H1C2E6	91.8	7.9e-92	346.3	55.8	98.4
maker-scaffold10x_291_pilon-snap-gene-0.85-mRNA-1_transcript=maker-scaffold10x_291_pilon-snap-gene-0.85-mRNA-1_gene=maker-scaffold10x_291_pilon-snap-gene-0.85	A0A2H1C2H4|A0A2H1C2H4_FASHE_RF_PROK_I_domain-containing_protein_OS=Fasciola_hepatica_OX=6192_GN=D915_11418_PE=4_SV=1	A0A2H1C2H4	97.6	4e-108	399.8	100	100
maker-scaffold10x_13_pilon-augustus-gene-2.165-mRNA-1_transcript=maker-scaffold10x_13_pilon-augustus-gene-2.165-mRNA-1_gene=maker-scaffold10x_13_pilon-augustus-gene-2.165	A0A2H1C2I5|A0A2H1C2I5_FASHE_PurA_ssDNA_and_RNA-binding_protein_OS=Fasciola_hepatica_OX=6192_GN=D915_007786_PE=4_SV=1	A0A2H1C2I5	100	8.3e-146	525.4	100	100
maker-scaffold10x_273_pilon-snap-gene-0.24-mRNA-1_transcript=maker-scaffold10x_273_pilon-snap-gene-0.24-mRNA-1_gene=maker-scaffold10x_273_pilon-snap-gene-0.24	A0A2H1C2J5|A0A2H1C2J5_FASHE_Insulin-induced_protein_OS=Fasciola_hepatica_OX=6192_GN=D915_12169_PE=4_SV=1	A0A2H1C2J5	98.5	9.7e-112	411.8	100	100
maker-scaffold10x_384_pilon-snap-gene-0.54-mRNA-1_transcript=maker-scaffold10x_384_pilon-snap-gene-0.54-mRNA-1_gene=maker-scaffold10x_384_pilon-snap-gene-0.54	A0A2H1C2K8|A0A2H1C2K8_FASHE_Tetraspanin_OS=Fasciola_hepatica_OX=6192_GN=D915_11369_PE=3_SV=1	A0A2H1C2K8	94	9.2e-111	408.7	100	100
maker-scaffold10x_1111_pilon-snap-gene-0.9-mRNA-1_transcript=maker-scaffold10x_1111_pilon-snap-gene-0.9-mRNA-1_gene=maker-scaffold10x_1111_pilon-snap-gene-0.9	A0A2H1C2M0|A0A2H1C2M0_FASHE_BolA-like_protein_OS=Fasciola_hepatica_OX=6192_GN=D915_007461_PE=3_SV=1	A0A2H1C2M0	100	6.5e-41	175.3	100	100
snap_masked-scaffold10x_149_pilon-processed-gene-0.122-mRNA-1_transcript=snap_masked-scaffold10x_149_pilon-processed-gene-0.122-mRNA-1_gene=snap_masked-scaffold10x_149_pilon-processed-gene-0.122	A0A2H1C2Q1|A0A2H1C2Q1_FASHE_Monocarboxylate_transporter_OS=Fasciola_hepatica_OX=6192_GN=D915_007048_PE=4_SV=1	A0A2H1C2Q1	99.5	5.4e-216	759.2	88.6	71
maker-scaffold10x_2132_pilon-snap-gene-0.8-mRNA-1_transcript=maker-scaffold10x_2132_pilon-snap-gene-0.8-mRNA-1_gene=maker-scaffold10x_2132_pilon-snap-gene-0.8	A0A2H1C2R8|A0A2H1C2R8_FASHE_Protein_kinase_domain-containing_protein_OS=Fasciola_hepatica_OX=6192_GN=D915_11318_PE=4_SV=1	A0A2H1C2R8	100	5e-140	506.1	91.9	100
maker-scaffold10x_142_pilon-snap-gene-0.82-mRNA-1_transcript=maker-scaffold10x_142_pilon-snap-gene-0.82-mRNA-1_gene=maker-scaffold10x_142_pilon-snap-gene-0.82	A0A2H1C2W3|A0A2H1C2W3_FASHE_Ras_family_protein_OS=Fasciola_hepatica_OX=6192_GN=D915_11269_PE=4_SV=1	A0A2H1C2W3	95.7	7.4e-81	312	11.5	85.6
maker-scaffold10x_80_pilon-augustus-gene-0.114-mRNA-1_transcript=maker-scaffold10x_80_pilon-augustus-gene-0.114-mRNA-1_gene=maker-scaffold10x_80_pilon-augustus-gene-0.114	A0A2H1C2Y6|A0A2H1C2Y6_FASHE_Leucine_Rich_repeat-containing_domain_protein_OS=Fasciola_hepatica_OX=6192_GN=D915_11263_PE=4_SV=1	A0A2H1C2Y6	99.7	4.5e-187	662.9	95.9	69.2
augustus_masked-scaffold10x_886_pilon-processed-gene-0.13-mRNA-1_transcript=augustus_masked-scaffold10x_886_pilon-processed-gene-0.13-mRNA-1_gene=augustus_masked-scaffold10x_886_pilon-processed-gene-0.13	A0A2H1C2Z6|A0A2H1C2Z6_FASHE_WD_domain,_G-beta_repeat_protein_OS=Fasciola_hepatica_OX=6192_GN=D915_11272_PE=4_SV=1	A0A2H1C2Z6	100	2.9e-145	523.5	100	42.4
maker-scaffold10x_561_pilon-pred_gff_StringTie-gene-0.24-mRNA-1_transcript=maker-scaffold10x_561_pilon-pred_gff_StringTie-gene-0.24-mRNA-1_gene=maker-scaffold10x_561_pilon-pred_gff_StringTie-gene-0.24	A0A2H1C2Z8|A0A2H1C2Z8_FASHE_Mannosyltransferase_OS=Fasciola_hepatica_OX=6192_GN=D915_007397_PE=3_SV=1	A0A2H1C2Z8	100	0	1253.4	100	100
maker-scaffold10x_143_pilon-augustus-gene-0.58-mRNA-1_transcript=maker-scaffold10x_143_pilon-augustus-gene-0.58-mRNA-1_gene=maker-scaffold10x_143_pilon-augustus-gene-0.58	A0A2H1C313|A0A2H1C313_FASHE_Diphosphomevalonate_decarboxylase_OS=Fasciola_hepatica_OX=6192_GN=D915_11928_PE=3_SV=1	A0A2H1C313	62.6	9.4e-26	125.2	78.4	41.1
maker-scaffold10x_263_pilon-snap-gene-0.30-mRNA-1_transcript=maker-scaffold10x_263_pilon-snap-gene-0.30-mRNA-1_gene=maker-scaffold10x_263_pilon-snap-gene-0.30	A0A2H1C321|A0A2H1C321_FASHE_Protein_phosphatase_1_regulatory_subunit_12A_OS=Fasciola_hepatica_OX=6192_GN=D915_007204_PE=4_SV=1	A0A2H1C321	99.6	5.5e-96	359.8	99.2	95.3
maker-scaffold10x_764_pilon-snap-gene-0.61-mRNA-1_transcript=maker-scaffold10x_764_pilon-snap-gene-0.61-mRNA-1_gene=maker-scaffold10x_764_pilon-snap-gene-0.61	A0A2H1C338|A0A2H1C338_FASHE_Trafficking_protein_particle_complex_subunit_OS=Fasciola_hepatica_OX=6192_GN=D915_11192_PE=3_SV=1	A0A2H1C338	95.7	7.7e-92	345.5	100	100
maker-scaffold10x_1820_pilon-augustus-gene-0.26-mRNA-1_transcript=maker-scaffold10x_1820_pilon-augustus-gene-0.26-mRNA-1_gene=maker-scaffold10x_1820_pilon-augustus-gene-0.26	A0A2H1C339|A0A2H1C339_FASHE_Ankyrin_repeat_protein_OS=Fasciola_hepatica_OX=6192_GN=D915_11179_PE=4_SV=1	A0A2H1C339	100	1e-136	495	100	100
maker-scaffold10x_1791_pilon-snap-gene-0.47-mRNA-1_transcript=maker-scaffold10x_1791_pilon-snap-gene-0.47-mRNA-1_gene=maker-scaffold10x_1791_pilon-snap-gene-0.47	A0A2H1C342|A0A2H1C342_FASHE_26S_proteasome_subunit_P45_family_protein_OS=Fasciola_hepatica_OX=6192_GN=D915_007091_PE=3_SV=1	A0A2H1C342	100	7.1e-248	865.1	100	100
maker-scaffold10x_1820_pilon-snap-gene-0.4-mRNA-1_transcript=maker-scaffold10x_1820_pilon-snap-gene-0.4-mRNA-1_gene=maker-scaffold10x_1820_pilon-snap-gene-0.4	A0A2H1C347|A0A2H1C347_FASHE_Protein_disulfide-isomerase_domain_protein_OS=Fasciola_hepatica_OX=6192_GN=D915_007160_PE=4_SV=1	A0A2H1C347	100	7.8e-281	975.7	53.4	100
augustus_masked-scaffold10x_199_pilon-processed-gene-0.94-mRNA-1_transcript=augustus_masked-scaffold10x_199_pilon-processed-gene-0.94-mRNA-1_gene=augustus_masked-scaffold10x_199_pilon-processed-gene-0.94	A0A2H1C351|A0A2H1C351_FASHE_Sodium/hydrogen_exchanger_OS=Fasciola_hepatica_OX=6192_GN=D915_11175_PE=3_SV=1	A0A2H1C351	100	6.2e-169	602.4	100	46.4
snap_masked-scaffold10x_199_pilon-processed-gene-0.117-mRNA-1_transcript=snap_masked-scaffold10x_199_pilon-processed-gene-0.117-mRNA-1_gene=snap_masked-scaffold10x_199_pilon-processed-gene-0.117	A0A2H1C362|A0A2H1C362_FASHE_Sodium/hydrogen_exchanger_OS=Fasciola_hepatica_OX=6192_GN=D915_11174_PE=3_SV=1	A0A2H1C362	99.4	0	1598.2	56.4	99.3
maker-scaffold10x_1791_pilon-snap-gene-0.52-mRNA-1_transcript=maker-scaffold10x_1791_pilon-snap-gene-0.52-mRNA-1_gene=maker-scaffold10x_1791_pilon-snap-gene-0.52	A0A2H1C365|A0A2H1C365_FASHE_Ribosomal_L28e_protein_OS=Fasciola_hepatica_OX=6192_GN=D915_007092_PE=4_SV=1	A0A2H1C365	100	6.5e-67	262.3	100	100
maker-scaffold10x_1349_pilon-snap-gene-0.14-mRNA-1_transcript=maker-scaffold10x_1349_pilon-snap-gene-0.14-mRNA-1_gene=maker-scaffold10x_1349_pilon-snap-gene-0.14	A0A2H1C399|A0A2H1C399_FASHE_WD_domain,_G-beta_repeat_protein_OS=Fasciola_hepatica_OX=6192_GN=D915_11840_PE=4_SV=1	A0A2H1C399	86.7	3.5e-214	753.1	99.7	86.3
maker-scaffold10x_1412_pilon-augustus-gene-0.15-mRNA-1_transcript=maker-scaffold10x_1412_pilon-augustus-gene-0.15-mRNA-1_gene=maker-scaffold10x_1412_pilon-augustus-gene-0.15	A0A2H1C3D0|A0A2H1C3D0_FASHE_Origin_recognition_complex_subunit_1_OS=Fasciola_hepatica_OX=6192_GN=D915_11090_PE=3_SV=1	A0A2H1C3D0	99.7	1.7e-164	587.8	87	100
maker-scaffold10x_712_pilon-augustus-gene-0.74-mRNA-1_transcript=maker-scaffold10x_712_pilon-augustus-gene-0.74-mRNA-1_gene=maker-scaffold10x_712_pilon-augustus-gene-0.74	A0A2H1C3E6|A0A2H1C3E6_FASHE_DM_DNA_binding_domain_protein_OS=Fasciola_hepatica_OX=6192_GN=D915_007415_PE=4_SV=1	A0A2H1C3E6	98.8	2.8e-230	806.6	100	100
augustus_masked-scaffold10x_269_pilon-processed-gene-0.22-mRNA-1_transcript=augustus_masked-scaffold10x_269_pilon-processed-gene-0.22-mRNA-1_gene=augustus_masked-scaffold10x_269_pilon-processed-gene-0.22	A0A2H1C3E9|A0A2H1C3E9_FASHE_Actin_OS=Fasciola_hepatica_OX=6192_GN=D915_007459_PE=3_SV=1	A0A2H1C3E9	100	3.1e-215	756.5	100	100
maker-scaffold10x_245_pilon-augustus-gene-0.90-mRNA-1_transcript=maker-scaffold10x_245_pilon-augustus-gene-0.90-mRNA-1_gene=maker-scaffold10x_245_pilon-augustus-gene-0.90	A0A2H1C3F3|A0A2H1C3F3_FASHE_Aldehyde_dehydrogenase_family_protein_OS=Fasciola_hepatica_OX=6192_GN=D915_11064_PE=3_SV=1	A0A2H1C3F3	97.8	5e-199	702.6	100	100
maker-scaffold10x_281_pilon-snap-gene-0.174-mRNA-1_transcript=maker-scaffold10x_281_pilon-snap-gene-0.174-mRNA-1_gene=maker-scaffold10x_281_pilon-snap-gene-0.174	A0A2H1C3H7|A0A2H1C3H7_FASHE_Mediator_of_RNA_polymerase_II_transcription_subunit_8_OS=Fasciola_hepatica_OX=6192_GN=MED8_PE=3_SV=1	A0A2H1C3H7	100	4.8e-103	382.9	100	100
maker-scaffold10x_281_pilon-snap-gene-0.177-mRNA-1_transcript=maker-scaffold10x_281_pilon-snap-gene-0.177-mRNA-1_gene=maker-scaffold10x_281_pilon-snap-gene-0.177	A0A2H1C3I7|A0A2H1C3I7_FASHE_Kunitz-type_protease_inhibitor_OS=Fasciola_hepatica_OX=6192_GN=D915_007188_PE=4_SV=1	A0A2H1C3I7	100	1.5e-52	214.2	100	100
maker-scaffold10x_30_pilon-snap-gene-0.12-mRNA-1_transcript=maker-scaffold10x_30_pilon-snap-gene-0.12-mRNA-1_gene=maker-scaffold10x_30_pilon-snap-gene-0.12	A0A2H1C3J5|A0A2H1C3J5_FASHE_PDZ_domain-containing_protein_(Fragment)_OS=Fasciola_hepatica_OX=6192_GN=D915_11738_PE=4_SV=1	A0A2H1C3J5	98.1	9.7e-82	313.5	29.9	85.5
maker-scaffold10x_205_pilon-snap-gene-0.74-mRNA-1_transcript=maker-scaffold10x_205_pilon-snap-gene-0.74-mRNA-1_gene=maker-scaffold10x_205_pilon-snap-gene-0.74	A0A2H1C3K7|A0A2H1C3K7_FASHE_XendoU_domain-containing_protein_OS=Fasciola_hepatica_OX=6192_GN=D915_11001_PE=4_SV=1	A0A2H1C3K7	100	5.7e-155	555.8	100	98.5
maker-scaffold10x_1055_pilon-snap-gene-0.2-mRNA-1_transcript=maker-scaffold10x_1055_pilon-snap-gene-0.2-mRNA-1_gene=maker-scaffold10x_1055_pilon-snap-gene-0.2	A0A2H1C3K8|A0A2H1C3K8_FASHE_C-type_lectin_domain-containing_protein_OS=Fasciola_hepatica_OX=6192_GN=D915_007343_PE=4_SV=1	A0A2H1C3K8	100	7.2e-208	732.3	87.8	87.8
maker-scaffold10x_942_pilon-snap-gene-0.50-mRNA-1_transcript=maker-scaffold10x_942_pilon-snap-gene-0.50-mRNA-1_gene=maker-scaffold10x_942_pilon-snap-gene-0.50	A0A2H1C3L0|A0A2H1C3L0_FASHE_Histidine_triad_domain_protein_OS=Fasciola_hepatica_OX=6192_GN=D915_007711_PE=4_SV=1	A0A2H1C3L0	100	1.9e-68	267.3	100	100
maker-scaffold10x_763_pilon-snap-gene-0.18-mRNA-1_transcript=maker-scaffold10x_763_pilon-snap-gene-0.18-mRNA-1_gene=maker-scaffold10x_763_pilon-snap-gene-0.18	A0A2H1C3M8|A0A2H1C3M8_FASHE_Translocon-associated_complex_TRAP_gamma_subunit_OS=Fasciola_hepatica_OX=6192_GN=D915_006941_PE=4_SV=1	A0A2H1C3M8	100	8.9e-88	332	100	100
maker-scaffold10x_65_pilon-snap-gene-0.13-mRNA-1_transcript=maker-scaffold10x_65_pilon-snap-gene-0.13-mRNA-1_gene=maker-scaffold10x_65_pilon-snap-gene-0.13	A0A2H1C3P3|A0A2H1C3P3_FASHE_14-3-3_protein_OS=Fasciola_hepatica_OX=6192_GN=D915_007241_PE=3_SV=1	A0A2H1C3P3	100	1.8e-131	477.6	100	100
augustus_masked-scaffold10x_269_pilon-processed-gene-0.18-mRNA-1_transcript=augustus_masked-scaffold10x_269_pilon-processed-gene-0.18-mRNA-1_gene=augustus_masked-scaffold10x_269_pilon-processed-gene-0.18	A0A2H1C3Q6|A0A2H1C3Q6_FASHE_Actin_OS=Fasciola_hepatica_OX=6192_GN=D915_006891_PE=3_SV=1	A0A2H1C3Q6	100	1.6e-216	760.8	100	100
maker-scaffold10x_637_pilon-snap-gene-0.165-mRNA-1_transcript=maker-scaffold10x_637_pilon-snap-gene-0.165-mRNA-1_gene=maker-scaffold10x_637_pilon-snap-gene-0.165	A0A2H1C3R8|A0A2H1C3R8_FASHE_TFIIIC_sub6_domain-containing_protein_OS=Fasciola_hepatica_OX=6192_GN=D915_007557_PE=4_SV=1	A0A2H1C3R8	85.9	9.4e-139	501.9	100	72.3
maker-scaffold10x_612_pilon-snap-gene-0.3-mRNA-1_transcript=maker-scaffold10x_612_pilon-snap-gene-0.3-mRNA-1_gene=maker-scaffold10x_612_pilon-snap-gene-0.3	A0A2H1C3S3|A0A2H1C3S3_FASHE_H/ACA_ribonucleo_protein_complex_subunit_2_OS=Fasciola_hepatica_OX=6192_GN=D915_007268_PE=4_SV=1	A0A2H1C3S3	96.2	3.2e-47	196.8	81.4	72.9
augustus_masked-scaffold10x_313_pilon-processed-gene-0.108-mRNA-1_transcript=augustus_masked-scaffold10x_313_pilon-processed-gene-0.108-mRNA-1_gene=augustus_masked-scaffold10x_313_pilon-processed-gene-0.108	A0A2H1C3S5|A0A2H1C3S5_FASHE_DJ-1_family_protein_OS=Fasciola_hepatica_OX=6192_GN=D915_007348_PE=4_SV=1	A0A2H1C3S5	100	1.3e-94	354.8	100	100
maker-scaffold10x_173_pilon-snap-gene-0.14-mRNA-1_transcript=maker-scaffold10x_173_pilon-snap-gene-0.14-mRNA-1_gene=maker-scaffold10x_173_pilon-snap-gene-0.14	A0A2H1C3T4|A0A2H1C3T4_FASHE_LMBR1-like_region_OS=Fasciola_hepatica_OX=6192_GN=D915_10961_PE=3_SV=1	A0A2H1C3T4	88.9	5.1e-280	973	65.3	95.2
maker-scaffold10x_1331_pilon-snap-gene-0.10-mRNA-1_transcript=maker-scaffold10x_1331_pilon-snap-gene-0.10-mRNA-1_gene=maker-scaffold10x_1331_pilon-snap-gene-0.10	A0A2H1C3U3|A0A2H1C3U3_FASHE_RNA_polymerase_Rpb5_domain_protein_OS=Fasciola_hepatica_OX=6192_GN=D915_006927_PE=3_SV=1	A0A2H1C3U3	100	7.8e-112	412.1	100	100
maker-scaffold10x_166_pilon-snap-gene-0.45-mRNA-1_transcript=maker-scaffold10x_166_pilon-snap-gene-0.45-mRNA-1_gene=maker-scaffold10x_166_pilon-snap-gene-0.45	A0A2H1C3W9|A0A2H1C3W9_FASHE_DNA-binding_protein_OS=Fasciola_hepatica_OX=6192_GN=D915_10907_PE=4_SV=1	A0A2H1C3W9	100	1.2e-214	754.6	100	100
maker-scaffold10x_225_pilon-snap-gene-0.7-mRNA-1_transcript=maker-scaffold10x_225_pilon-snap-gene-0.7-mRNA-1_gene=maker-scaffold10x_225_pilon-snap-gene-0.7	A0A2H1C3Y1|A0A2H1C3Y1_FASHE_Sjoegren_syndrome_nuclear_autoantigen_1-like_family_protein_OS=Fasciola_hepatica_OX=6192_GN=D915_007337_PE=4_SV=1	A0A2H1C3Y1	100	1.7e-52	214.2	100	100
maker-scaffold10x_1705_pilon-snap-gene-0.6-mRNA-1_transcript=maker-scaffold10x_1705_pilon-snap-gene-0.6-mRNA-1_gene=maker-scaffold10x_1705_pilon-snap-gene-0.6	A0A2H1C3Z4|A0A2H1C3Z4_FASHE_Ubiquitin--protein_ligase_OS=Fasciola_hepatica_OX=6192_GN=D915_007278_PE=3_SV=1	A0A2H1C3Z4	100	8.3e-96	358.6	100	100
maker-scaffold10x_1382_pilon-snap-gene-0.50-mRNA-1_transcript=maker-scaffold10x_1382_pilon-snap-gene-0.50-mRNA-1_gene=maker-scaffold10x_1382_pilon-snap-gene-0.50	A0A2H1C3Z8|A0A2H1C3Z8_FASHE_L23A_ribosomal_protein_natural_variant_OS=Fasciola_hepatica_OX=6192_GN=D915_007199_PE=3_SV=1	A0A2H1C3Z8	100	1.9e-83	317.8	100	100
maker-scaffold10x_145_pilon-snap-gene-2.175-mRNA-1_transcript=maker-scaffold10x_145_pilon-snap-gene-2.175-mRNA-1_gene=maker-scaffold10x_145_pilon-snap-gene-2.175	A0A2H1C401|A0A2H1C401_FASHE_Leucine_Rich_repeat-containing_domain_protein_(Fragment)_OS=Fasciola_hepatica_OX=6192_GN=D915_10886_PE=4_SV=1	A0A2H1C401	71.3	3.9e-88	334.3	82.1	100
maker-scaffold10x_1096_pilon-snap-gene-0.67-mRNA-1_transcript=maker-scaffold10x_1096_pilon-snap-gene-0.67-mRNA-1_gene=maker-scaffold10x_1096_pilon-snap-gene-0.67	A0A2H1C403|A0A2H1C403_FASHE_Ribosomal_protein_L20_OS=Fasciola_hepatica_OX=6192_GN=D915_11550_PE=4_SV=1	A0A2H1C403	100	4.8e-88	332.8	100	100
maker-scaffold10x_1213_pilon-augustus-gene-0.11-mRNA-1_transcript=maker-scaffold10x_1213_pilon-augustus-gene-0.11-mRNA-1_gene=maker-scaffold10x_1213_pilon-augustus-gene-0.11	A0A2H1C415|A0A2H1C415_FASHE_CUB_domain-containing_protein_OS=Fasciola_hepatica_OX=6192_GN=D915_10867_PE=4_SV=1	A0A2H1C415	98.2	1.7e-22	114.4	53.9	40.4
augustus_masked-scaffold10x_988_pilon-processed-gene-0.24-mRNA-1_transcript=augustus_masked-scaffold10x_988_pilon-processed-gene-0.24-mRNA-1_gene=augustus_masked-scaffold10x_988_pilon-processed-gene-0.24	A0A2H1C418|A0A2H1C418_FASHE_Endonuclease/exonuclease/phosphatase_family_protein_OS=Fasciola_hepatica_OX=6192_GN=D915_007149_PE=4_SV=1	A0A2H1C418	100	4.6e-91	342.8	100	47.8
maker-scaffold10x_646_pilon-snap-gene-0.19-mRNA-1_transcript=maker-scaffold10x_646_pilon-snap-gene-0.19-mRNA-1_gene=maker-scaffold10x_646_pilon-snap-gene-0.19	A0A2H1C428|A0A2H1C428_FASHE_Glycosyltransferase,_family_8_(Fragment)_OS=Fasciola_hepatica_OX=6192_GN=D915_10863_PE=4_SV=1	A0A2H1C428	51.1	2.3e-30	141.4	70.7	40.7
maker-scaffold10x_78_pilon-augustus-gene-0.15-mRNA-1_transcript=maker-scaffold10x_78_pilon-augustus-gene-0.15-mRNA-1_gene=maker-scaffold10x_78_pilon-augustus-gene-0.15	A0A2H1C428|A0A2H1C428_FASHE_Glycosyltransferase,_family_8_(Fragment)_OS=Fasciola_hepatica_OX=6192_GN=D915_10863_PE=4_SV=1	A0A2H1C428	48.3	2.8e-51	211.5	72.1	63.3
maker-scaffold10x_78_pilon-snap-gene-0.31-mRNA-1_transcript=maker-scaffold10x_78_pilon-snap-gene-0.31-mRNA-1_gene=maker-scaffold10x_78_pilon-snap-gene-0.31	A0A2H1C428|A0A2H1C428_FASHE_Glycosyltransferase,_family_8_(Fragment)_OS=Fasciola_hepatica_OX=6192_GN=D915_10863_PE=4_SV=1	A0A2H1C428	94.2	5.2e-179	636	98.1	99.7
maker-scaffold10x_718_pilon-snap-gene-0.10-mRNA-1_transcript=maker-scaffold10x_718_pilon-snap-gene-0.10-mRNA-1_gene=maker-scaffold10x_718_pilon-snap-gene-0.10	A0A2H1C431|A0A2H1C431_FASHE_RanBP2-type_domain-containing_protein_OS=Fasciola_hepatica_OX=6192_GN=D915_10827_PE=4_SV=1	A0A2H1C431	100	2.4e-104	387.1	100	98.9
maker-scaffold10x_370_pilon-snap-gene-0.43-mRNA-1_transcript=maker-scaffold10x_370_pilon-snap-gene-0.43-mRNA-1_gene=maker-scaffold10x_370_pilon-snap-gene-0.43	A0A2H1C464|A0A2H1C464_FASHE_Preprotein_translocase,_SecY_subunit_OS=Fasciola_hepatica_OX=6192_GN=D915_007124_PE=3_SV=1	A0A2H1C464	100	3.3e-267	929.5	100	100
maker-scaffold10x_943_pilon-snap-gene-0.30-mRNA-1_transcript=maker-scaffold10x_943_pilon-snap-gene-0.30-mRNA-1_gene=maker-scaffold10x_943_pilon-snap-gene-0.30	A0A2H1C4D5|A0A2H1C4D5_FASHE_Ribosomal_protein_S15Aa_OS=Fasciola_hepatica_OX=6192_GN=D915_006887_PE=3_SV=1	A0A2H1C4D5	100	6.4e-48	199.1	78.1	76.9
maker-scaffold10x_317_pilon-snap-gene-0.52-mRNA-1_transcript=maker-scaffold10x_317_pilon-snap-gene-0.52-mRNA-1_gene=maker-scaffold10x_317_pilon-snap-gene-0.52	A0A2H1C4F2|A0A2H1C4F2_FASHE_Ras_family_protein_OS=Fasciola_hepatica_OX=6192_GN=D915_10705_PE=4_SV=1	A0A2H1C4F2	100	1.4e-85	325.5	53.6	89.7
maker-scaffold10x_2484_pilon-augustus-gene-0.11-mRNA-1_transcript=maker-scaffold10x_2484_pilon-augustus-gene-0.11-mRNA-1_gene=maker-scaffold10x_2484_pilon-augustus-gene-0.11	A0A2H1C4G5|A0A2H1C4G5_FASHE_Glucose-induced_degradation_protein_8_OS=Fasciola_hepatica_OX=6192_GN=D915_007660_PE=4_SV=1	A0A2H1C4G5	100	9e-148	531.9	100	100
maker-scaffold10x_93_pilon-snap-gene-0.123-mRNA-1_transcript=maker-scaffold10x_93_pilon-snap-gene-0.123-mRNA-1_gene=maker-scaffold10x_93_pilon-snap-gene-0.123	A0A2H1C4H0|A0A2H1C4H0_FASHE_Mitochondrial_pyruvate_carrier_OS=Fasciola_hepatica_OX=6192_GN=D915_007200_PE=3_SV=1	A0A2H1C4H0	100	6.7e-63	248.8	100	100
maker-scaffold10x_281_pilon-snap-gene-0.158-mRNA-1_transcript=maker-scaffold10x_281_pilon-snap-gene-0.158-mRNA-1_gene=maker-scaffold10x_281_pilon-snap-gene-0.158	A0A2H1C4H4|A0A2H1C4H4_FASHE_Golgi-associated_plant_pathogenesis_protein_1_OS=Fasciola_hepatica_OX=6192_GN=D915_007597_PE=4_SV=1	A0A2H1C4H4	99.5	2.3e-225	790.4	86.6	97.3
maker-scaffold10x_1404_pilon-augustus-gene-0.44-mRNA-1_transcript=maker-scaffold10x_1404_pilon-augustus-gene-0.44-mRNA-1_gene=maker-scaffold10x_1404_pilon-augustus-gene-0.44	A0A2H1C4J5|A0A2H1C4J5_FASHE_CTLH_domain-containing_protein_OS=Fasciola_hepatica_OX=6192_GN=D915_11436_PE=4_SV=1	A0A2H1C4J5	99.7	9.9e-188	665.2	92	41.8
maker-scaffold10x_53_pilon-augustus-gene-0.8-mRNA-1_transcript=maker-scaffold10x_53_pilon-augustus-gene-0.8-mRNA-1_gene=maker-scaffold10x_53_pilon-augustus-gene-0.8	A0A2H1C4L1|A0A2H1C4L1_FASHE_CTLH_domain-containing_protein_OS=Fasciola_hepatica_OX=6192_GN=D915_10655_PE=4_SV=1	A0A2H1C4L1	99.1	8.9e-128	465.7	75.4	95.5
snap_masked-scaffold10x_2033_pilon-processed-gene-0.8-mRNA-1_transcript=snap_masked-scaffold10x_2033_pilon-processed-gene-0.8-mRNA-1_gene=snap_masked-scaffold10x_2033_pilon-processed-gene-0.8	A0A2H1C4L9|A0A2H1C4L9_FASHE_Cathepsin_propeptide_inhibitor_domain_protein_OS=Fasciola_hepatica_OX=6192_GN=D915_006963_PE=4_SV=1	A0A2H1C4L9	98.3	2.3e-101	377.5	80.7	97.8
maker-scaffold10x_486_pilon-snap-gene-0.73-mRNA-1_transcript=maker-scaffold10x_486_pilon-snap-gene-0.73-mRNA-1_gene=maker-scaffold10x_486_pilon-snap-gene-0.73	A0A2H1C4M4|A0A2H1C4M4_FASHE_Protein_kinase_domain-containing_protein_OS=Fasciola_hepatica_OX=6192_GN=D915_10635_PE=4_SV=1	A0A2H1C4M4	76.9	0	1108.2	37.4	90.8
snap_masked-scaffold10x_2518_pilon-processed-gene-0.6-mRNA-1_transcript=snap_masked-scaffold10x_2518_pilon-processed-gene-0.6-mRNA-1_gene=snap_masked-scaffold10x_2518_pilon-processed-gene-0.6	A0A2H1C4N3|A0A2H1C4N3_FASHE_PDZ_and_LIM_domain_protein_Zasp_OS=Fasciola_hepatica_OX=6192_GN=D915_007036_PE=4_SV=1	A0A2H1C4N3	94.5	8.5e-53	216.1	51.6	57.3
maker-scaffold10x_229_pilon-snap-gene-0.7-mRNA-1_transcript=maker-scaffold10x_229_pilon-snap-gene-0.7-mRNA-1_gene=maker-scaffold10x_229_pilon-snap-gene-0.7	A0A2H1C4N6|A0A2H1C4N6_FASHE_Metal_cation_transporter,_ZIP_family_OS=Fasciola_hepatica_OX=6192_GN=D915_10621_PE=4_SV=1	A0A2H1C4N6	99.4	1e-192	681.8	91	90.4
maker-scaffold10x_2064_pilon-pred_gff_StringTie-gene-0.0-mRNA-1_transcript=maker-scaffold10x_2064_pilon-pred_gff_StringTie-gene-0.0-mRNA-1_gene=maker-scaffold10x_2064_pilon-pred_gff_StringTie-gene-0.0	A0A2H1C4R8|A0A2H1C4R8_FASHE_Ribosomal_L27e_protein_OS=Fasciola_hepatica_OX=6192_GN=D915_006893_PE=4_SV=1	A0A2H1C4R8	99.4	5.3e-87	329.3	100	91.6
maker-scaffold10x_236_pilon-snap-gene-0.88-mRNA-1_transcript=maker-scaffold10x_236_pilon-snap-gene-0.88-mRNA-1_gene=maker-scaffold10x_236_pilon-snap-gene-0.88	A0A2H1C4S6|A0A2H1C4S6_FASHE_Rab-GAP_TBC_domain-containing_protein_(Fragment)_OS=Fasciola_hepatica_OX=6192_GN=D915_10560_PE=4_SV=1	A0A2H1C4S6	99.3	6.8e-253	882.9	49.1	97.1
maker-scaffold10x_381_pilon-snap-gene-0.25-mRNA-1_transcript=maker-scaffold10x_381_pilon-snap-gene-0.25-mRNA-1_gene=maker-scaffold10x_381_pilon-snap-gene-0.25	A0A2H1C4T6|A0A2H1C4T6_FASHE_IRS-type_PTB_domain-containing_protein_OS=Fasciola_hepatica_OX=6192_GN=D915_006932_PE=4_SV=1	A0A2H1C4T6	99.5	0	1667.5	100	81.7
maker-scaffold10x_381_pilon-snap-gene-0.32-mRNA-1_transcript=maker-scaffold10x_381_pilon-snap-gene-0.32-mRNA-1_gene=maker-scaffold10x_381_pilon-snap-gene-0.32	A0A2H1C4T9|A0A2H1C4T9_FASHE_Tctex-1_family_protein_OS=Fasciola_hepatica_OX=6192_GN=D915_10548_PE=4_SV=1	A0A2H1C4T9	100	2.4e-69	270.4	100	100
augustus_masked-scaffold10x_494_pilon-processed-gene-0.26-mRNA-1_transcript=augustus_masked-scaffold10x_494_pilon-processed-gene-0.26-mRNA-1_gene=augustus_masked-scaffold10x_494_pilon-processed-gene-0.26	A0A2H1C4V8|A0A2H1C4V8_FASHE_IQ_and_ubiquitin_domain-containing_protein_OS=Fasciola_hepatica_OX=6192_GN=D915_006738_PE=4_SV=1	A0A2H1C4V8	99.9	0	1776.9	100	100
maker-scaffold10x_127_pilon-snap-gene-0.27-mRNA-1_transcript=maker-scaffold10x_127_pilon-snap-gene-0.27-mRNA-1_gene=maker-scaffold10x_127_pilon-snap-gene-0.27	A0A2H1C4X5|A0A2H1C4X5_FASHE_Nucleoside-triphosphatase_THEP1_domain_protein_OS=Fasciola_hepatica_OX=6192_GN=D915_10503_PE=4_SV=1	A0A2H1C4X5	98.5	2e-104	388.3	60.4	86.8
maker-scaffold10x_513_pilon-snap-gene-1.144-mRNA-1_transcript=maker-scaffold10x_513_pilon-snap-gene-1.144-mRNA-1_gene=maker-scaffold10x_513_pilon-snap-gene-1.144	A0A2H1C4Z4|A0A2H1C4Z4_FASHE_Receptor_expression-enhancing_protein_OS=Fasciola_hepatica_OX=6192_GN=D915_10483_PE=3_SV=1	A0A2H1C4Z4	100	2.9e-97	363.6	100	100
maker-scaffold10x_325_pilon-snap-gene-0.68-mRNA-1_transcript=maker-scaffold10x_325_pilon-snap-gene-0.68-mRNA-1_gene=maker-scaffold10x_325_pilon-snap-gene-0.68	A0A2H1C4Z5|A0A2H1C4Z5_FASHE_DUF4378_domain-containing_protein_OS=Fasciola_hepatica_OX=6192_GN=D915_11287_PE=4_SV=1	A0A2H1C4Z5	99.1	4e-232	815.1	21.3	96.9
maker-scaffold10x_703_pilon-snap-gene-0.85-mRNA-1_transcript=maker-scaffold10x_703_pilon-snap-gene-0.85-mRNA-1_gene=maker-scaffold10x_703_pilon-snap-gene-0.85	A0A2H1C510|A0A2H1C510_FASHE_Occludin_ELL_domain-containing_protein_(Fragment)_OS=Fasciola_hepatica_OX=6192_GN=D915_10466_PE=4_SV=1	A0A2H1C510	99.6	5.2e-297	1029.2	67.1	98.9
maker-scaffold10x_1339_pilon-snap-gene-0.40-mRNA-1_transcript=maker-scaffold10x_1339_pilon-snap-gene-0.40-mRNA-1_gene=maker-scaffold10x_1339_pilon-snap-gene-0.40	A0A2H1C567|A0A2H1C567_FASHE_Retroviral_aspartyl_protease_OS=Fasciola_hepatica_OX=6192_GN=D915_11216_PE=4_SV=1	A0A2H1C567	70.7	1.5e-23	117.9	74.3	21.8
maker-scaffold10x_14_pilon-snap-gene-0.116-mRNA-1_transcript=maker-scaffold10x_14_pilon-snap-gene-0.116-mRNA-1_gene=maker-scaffold10x_14_pilon-snap-gene-0.116	A0A2H1C567|A0A2H1C567_FASHE_Retroviral_aspartyl_protease_OS=Fasciola_hepatica_OX=6192_GN=D915_11216_PE=4_SV=1	A0A2H1C567	68.8	2.5e-64	254.6	78.2	55.8
maker-scaffold10x_316_pilon-snap-gene-0.4-mRNA-1_transcript=maker-scaffold10x_316_pilon-snap-gene-0.4-mRNA-1_gene=maker-scaffold10x_316_pilon-snap-gene-0.4	A0A2H1C567|A0A2H1C567_FASHE_Retroviral_aspartyl_protease_OS=Fasciola_hepatica_OX=6192_GN=D915_11216_PE=4_SV=1	A0A2H1C567	88.1	7.9e-61	242.7	67	39
maker-scaffold10x_794_pilon-snap-gene-0.112-mRNA-1_transcript=maker-scaffold10x_794_pilon-snap-gene-0.112-mRNA-1_gene=maker-scaffold10x_794_pilon-snap-gene-0.112	A0A2H1C567|A0A2H1C567_FASHE_Retroviral_aspartyl_protease_OS=Fasciola_hepatica_OX=6192_GN=D915_11216_PE=4_SV=1	A0A2H1C567	89.7	8.7e-64	253.1	45.8	39.5
maker-scaffold10x_95_pilon-snap-gene-0.18-mRNA-1_transcript=maker-scaffold10x_95_pilon-snap-gene-0.18-mRNA-1_gene=maker-scaffold10x_95_pilon-snap-gene-0.18	A0A2H1C567|A0A2H1C567_FASHE_Retroviral_aspartyl_protease_OS=Fasciola_hepatica_OX=6192_GN=D915_11216_PE=4_SV=1	A0A2H1C567	86.5	1.8e-46	194.9	54.7	30.2
snap_masked-scaffold10x_1490_pilon-processed-gene-0.2-mRNA-1_transcript=snap_masked-scaffold10x_1490_pilon-processed-gene-0.2-mRNA-1_gene=snap_masked-scaffold10x_1490_pilon-processed-gene-0.2	A0A2H1C567|A0A2H1C567_FASHE_Retroviral_aspartyl_protease_OS=Fasciola_hepatica_OX=6192_GN=D915_11216_PE=4_SV=1	A0A2H1C567	86.3	4.4e-79	303.9	55.6	48.8
snap_masked-scaffold10x_485_pilon-processed-gene-0.40-mRNA-1_transcript=snap_masked-scaffold10x_485_pilon-processed-gene-0.40-mRNA-1_gene=snap_masked-scaffold10x_485_pilon-processed-gene-0.40	A0A2H1C579|A0A2H1C579_FASHE_Plant_viral-response_family_protein_OS=Fasciola_hepatica_OX=6192_GN=D915_006653_PE=4_SV=1	A0A2H1C579	99.7	2.6e-180	640.2	100	100
maker-scaffold10x_734_pilon-augustus-gene-0.2-mRNA-1_transcript=maker-scaffold10x_734_pilon-augustus-gene-0.2-mRNA-1_gene=maker-scaffold10x_734_pilon-augustus-gene-0.2	A0A2H1C584|A0A2H1C584_FASHE_3-hydroxymethyl-3-methylglutaryl-CoA_lyase_cytoplasmic_OS=Fasciola_hepatica_OX=6192_GN=D915_006919_PE=4_SV=1	A0A2H1C584	99.7	2.2e-174	620.5	100	100
maker-scaffold10x_324_pilon-snap-gene-0.64-mRNA-1_transcript=maker-scaffold10x_324_pilon-snap-gene-0.64-mRNA-1_gene=maker-scaffold10x_324_pilon-snap-gene-0.64	A0A2H1C587|A0A2H1C587_FASHE_Chromatin_accessibility_complex_protein_1_OS=Fasciola_hepatica_OX=6192_GN=D915_006872_PE=4_SV=1	A0A2H1C587	99.1	1.1e-53	218	100	100
maker-scaffold10x_1281_pilon-snap-gene-0.19-mRNA-1_transcript=maker-scaffold10x_1281_pilon-snap-gene-0.19-mRNA-1_gene=maker-scaffold10x_1281_pilon-snap-gene-0.19	A0A2H1C595|A0A2H1C595_FASHE_U3_small_nucleolar_RNA-associated_protein_23_OS=Fasciola_hepatica_OX=6192_GN=D915_006848_PE=4_SV=1	A0A2H1C595	99.6	1.5e-144	521.2	100	100
augustus_masked-scaffold10x_432_pilon-processed-gene-0.157-mRNA-1_transcript=augustus_masked-scaffold10x_432_pilon-processed-gene-0.157-mRNA-1_gene=augustus_masked-scaffold10x_432_pilon-processed-gene-0.157	A0A2H1C596|A0A2H1C596_FASHE_39S_ribosomal_protein_L23_OS=Fasciola_hepatica_OX=6192_GN=D915_006717_PE=4_SV=1	A0A2H1C596	100	8.1e-115	422.2	91.5	63.6
maker-scaffold10x_196_pilon-snap-gene-0.21-mRNA-1_transcript=maker-scaffold10x_196_pilon-snap-gene-0.21-mRNA-1_gene=maker-scaffold10x_196_pilon-snap-gene-0.21	A0A2H1C5B7|A0A2H1C5B7_FASHE_WD_domain,_G-beta_repeat_protein_OS=Fasciola_hepatica_OX=6192_GN=D915_10353_PE=4_SV=1	A0A2H1C5B7	97.5	0	2059.6	100	100
maker-scaffold10x_2779_pilon-snap-gene-0.1-mRNA-1_transcript=maker-scaffold10x_2779_pilon-snap-gene-0.1-mRNA-1_gene=maker-scaffold10x_2779_pilon-snap-gene-0.1	A0A2H1C5F6|A0A2H1C5F6_FASHE_Thyroglobulin_type-1_domain-containing_protein_OS=Fasciola_hepatica_OX=6192_GN=D915_10322_PE=4_SV=1	A0A2H1C5F6	98	2.1e-135	490.7	98.4	96.9
maker-scaffold10x_1698_pilon-augustus-gene-0.1-mRNA-1_transcript=maker-scaffold10x_1698_pilon-augustus-gene-0.1-mRNA-1_gene=maker-scaffold10x_1698_pilon-augustus-gene-0.1	A0A2H1C5J7|A0A2H1C5J7_FASHE_BRCT_domain-containing_protein_OS=Fasciola_hepatica_OX=6192_GN=D915_10286_PE=4_SV=1	A0A2H1C5J7	86	3.1e-111	410.2	98.1	64.6
maker-scaffold10x_460_pilon-snap-gene-0.15-mRNA-1_transcript=maker-scaffold10x_460_pilon-snap-gene-0.15-mRNA-1_gene=maker-scaffold10x_460_pilon-snap-gene-0.15	A0A2H1C5L0|A0A2H1C5L0_FASHE_RNase_Zc3h12a_domain-containing_protein_(Fragment)_OS=Fasciola_hepatica_OX=6192_GN=D915_11066_PE=4_SV=1	A0A2H1C5L0	91.9	5.8e-197	696	85.8	78.9
maker-scaffold10x_979_pilon-snap-gene-0.0-mRNA-1_transcript=maker-scaffold10x_979_pilon-snap-gene-0.0-mRNA-1_gene=maker-scaffold10x_979_pilon-snap-gene-0.0	A0A2H1C5L1|A0A2H1C5L1_FASHE_Zinc_finger,_C2H2_type_OS=Fasciola_hepatica_OX=6192_GN=D915_10250_PE=4_SV=1	A0A2H1C5L1	100	5.9e-213	749.2	87.1	100
maker-scaffold10x_785_pilon-snap-gene-0.11-mRNA-1_transcript=maker-scaffold10x_785_pilon-snap-gene-0.11-mRNA-1_gene=maker-scaffold10x_785_pilon-snap-gene-0.11	A0A2H1C5L2|A0A2H1C5L2_FASHE_SRP40_protein_OS=Fasciola_hepatica_OX=6192_GN=D915_10257_PE=4_SV=1	A0A2H1C5L2	80.6	1.1e-95	359.4	85.7	92.7
maker-scaffold10x_432_pilon-snap-gene-0.118-mRNA-1_transcript=maker-scaffold10x_432_pilon-snap-gene-0.118-mRNA-1_gene=maker-scaffold10x_432_pilon-snap-gene-0.118	A0A2H1C5M1|A0A2H1C5M1_FASHE_40S_ribosomal_protein_S24_OS=Fasciola_hepatica_OX=6192_GN=D915_006838_PE=3_SV=1	A0A2H1C5M1	100	1.1e-63	251.5	100	100
maker-scaffold10x_1184_pilon-snap-gene-0.34-mRNA-1_transcript=maker-scaffold10x_1184_pilon-snap-gene-0.34-mRNA-1_gene=maker-scaffold10x_1184_pilon-snap-gene-0.34	A0A2H1C5N4|A0A2H1C5N4_FASHE_Cathepsin_L_OS=Fasciola_hepatica_OX=6192_GN=D915_006684_PE=3_SV=1	A0A2H1C5N4	98.9	1.6e-213	750.7	100	100
maker-scaffold10x_345_pilon-snap-gene-1.122-mRNA-1_transcript=maker-scaffold10x_345_pilon-snap-gene-1.122-mRNA-1_gene=maker-scaffold10x_345_pilon-snap-gene-1.122	A0A2H1C5S0|A0A2H1C5S0_FASHE_ribosomal_protein_L37a_OS=Fasciola_hepatica_OX=6192_GN=D915_006726_PE=3_SV=1	A0A2H1C5S0	100	1.5e-43	184.1	100	100
maker-scaffold10x_926_pilon-snap-gene-0.144-mRNA-1_transcript=maker-scaffold10x_926_pilon-snap-gene-0.144-mRNA-1_gene=maker-scaffold10x_926_pilon-snap-gene-0.144	A0A2H1C5S2|A0A2H1C5S2_FASHE_FFD_and_TFG_box_motif_protein_OS=Fasciola_hepatica_OX=6192_GN=D915_11006_PE=4_SV=1	A0A2H1C5S2	99	7.6e-161	576.2	58.1	79.2
maker-scaffold10x_1781_pilon-snap-gene-0.3-mRNA-1_transcript=maker-scaffold10x_1781_pilon-snap-gene-0.3-mRNA-1_gene=maker-scaffold10x_1781_pilon-snap-gene-0.3	A0A2H1C5S4|A0A2H1C5S4_FASHE_Tubulin_alpha_chain_OS=Fasciola_hepatica_OX=6192_GN=D915_006626_PE=3_SV=1	A0A2H1C5S4	100	8e-120	438.7	100	46.9
maker-scaffold10x_724_pilon-pred_gff_StringTie-gene-0.61-mRNA-1_transcript=maker-scaffold10x_724_pilon-pred_gff_StringTie-gene-0.61-mRNA-1_gene=maker-scaffold10x_724_pilon-pred_gff_StringTie-gene-0.61	A0A2H1C5U3|A0A2H1C5U3_FASHE_Heterotrimeric_guanine_nucleotide-binding_protein_beta_subunit_OS=Fasciola_hepatica_OX=6192_GN=D915_006172_PE=4_SV=1	A0A2H1C5U3	100	1.5e-158	568.2	100	100
maker-scaffold10x_830_pilon-snap-gene-0.22-mRNA-1_transcript=maker-scaffold10x_830_pilon-snap-gene-0.22-mRNA-1_gene=maker-scaffold10x_830_pilon-snap-gene-0.22	A0A2H1C5W1|A0A2H1C5W1_FASHE_JmjC_domain_protein_OS=Fasciola_hepatica_OX=6192_GN=D915_10200_PE=4_SV=1	A0A2H1C5W1	99.4	4.2e-92	346.3	100	59.9
maker-scaffold10x_1148_pilon-snap-gene-0.9-mRNA-1_transcript=maker-scaffold10x_1148_pilon-snap-gene-0.9-mRNA-1_gene=maker-scaffold10x_1148_pilon-snap-gene-0.9	A0A2H1C602|A0A2H1C602_FASHE_Arf-GAP_with_dual_PH_domain-containing_protein_1_OS=Fasciola_hepatica_OX=6192_GN=D915_006563_PE=4_SV=1	A0A2H1C602	99.8	2e-236	827	100	100
maker-scaffold10x_1083_pilon-snap-gene-0.14-mRNA-1_transcript=maker-scaffold10x_1083_pilon-snap-gene-0.14-mRNA-1_gene=maker-scaffold10x_1083_pilon-snap-gene-0.14	A0A2H1C612|A0A2H1C612_FASHE_Electron_transfer_flavoprotein_FAD-binding_domain_protein_(Fragment)_OS=Fasciola_hepatica_OX=6192_GN=D915_10095_PE=4_SV=1	A0A2H1C612	99.3	1.9e-77	298.1	62.2	54.9
maker-scaffold10x_832_pilon-augustus-gene-0.33-mRNA-1_transcript=maker-scaffold10x_832_pilon-augustus-gene-0.33-mRNA-1_gene=maker-scaffold10x_832_pilon-augustus-gene-0.33	A0A2H1C641|A0A2H1C641_FASHE_ATPase_ASNA1_homolog_OS=Fasciola_hepatica_OX=6192_GN=D915_006615_PE=3_SV=1	A0A2H1C641	100	1.6e-197	697.6	100	100
maker-scaffold10x_83_pilon-snap-gene-0.222-mRNA-1_transcript=maker-scaffold10x_83_pilon-snap-gene-0.222-mRNA-1_gene=maker-scaffold10x_83_pilon-snap-gene-0.222	A0A2H1C670|A0A2H1C670_FASHE_Apoptosis_inhibitor_OS=Fasciola_hepatica_OX=6192_GN=D915_006318_PE=4_SV=1	A0A2H1C670	99.8	0	1076.2	100	100
maker-scaffold10x_20_pilon-snap-gene-0.10-mRNA-1_transcript=maker-scaffold10x_20_pilon-snap-gene-0.10-mRNA-1_gene=maker-scaffold10x_20_pilon-snap-gene-0.10	A0A2H1C6C3|A0A2H1C6C3_FASHE_Aldose_1-epimerase_OS=Fasciola_hepatica_OX=6192_GN=D915_007208_PE=3_SV=1	A0A2H1C6C3	100	3.7e-224	786.2	100	100
maker-scaffold10x_412_pilon-snap-gene-0.23-mRNA-1_transcript=maker-scaffold10x_412_pilon-snap-gene-0.23-mRNA-1_gene=maker-scaffold10x_412_pilon-snap-gene-0.23	A0A2H1C6E6|A0A2H1C6E6_FASHE_CAF1_family_ribonuclease_OS=Fasciola_hepatica_OX=6192_GN=D915_10677_PE=4_SV=1	A0A2H1C6E6	100	2.6e-239	836.6	100	100
snap_masked-scaffold10x_760_pilon-processed-gene-0.37-mRNA-1_transcript=snap_masked-scaffold10x_760_pilon-processed-gene-0.37-mRNA-1_gene=snap_masked-scaffold10x_760_pilon-processed-gene-0.37	A0A2H1C6G7|A0A2H1C6G7_FASHE_Tubulin_binding_cofactor_OS=Fasciola_hepatica_OX=6192_GN=D915_09928_PE=4_SV=1	A0A2H1C6G7	99.6	5e-131	476.1	99.1	93.6
maker-scaffold10x_935_pilon-snap-gene-0.43-mRNA-1_transcript=maker-scaffold10x_935_pilon-snap-gene-0.43-mRNA-1_gene=maker-scaffold10x_935_pilon-snap-gene-0.43	A0A2H1C6H9|A0A2H1C6H9_FASHE_Rap-GAP_domain-containing_protein_(Fragment)_OS=Fasciola_hepatica_OX=6192_GN=D915_09906_PE=4_SV=1	A0A2H1C6H9	72.4	0	1253.4	94.7	92.2
maker-scaffold10x_1074_pilon-snap-gene-0.113-mRNA-1_transcript=maker-scaffold10x_1074_pilon-snap-gene-0.113-mRNA-1_gene=maker-scaffold10x_1074_pilon-snap-gene-0.113	A0A2H1C6J7|A0A2H1C6J7_FASHE_Ribosomal_protein_L13_OS=Fasciola_hepatica_OX=6192_GN=D915_006691_PE=3_SV=1	A0A2H1C6J7	88.8	3e-88	333.6	100	97
maker-scaffold10x_1477_pilon-snap-gene-0.10-mRNA-1_transcript=maker-scaffold10x_1477_pilon-snap-gene-0.10-mRNA-1_gene=maker-scaffold10x_1477_pilon-snap-gene-0.10	A0A2H1C6N0|A0A2H1C6N0_FASHE_Core-2/I-Branching_enzyme_OS=Fasciola_hepatica_OX=6192_GN=D915_10578_PE=4_SV=1	A0A2H1C6N0	99.5	4.3e-239	837	44.5	95.1
maker-scaffold10x_297_pilon-snap-gene-0.21-mRNA-1_transcript=maker-scaffold10x_297_pilon-snap-gene-0.21-mRNA-1_gene=maker-scaffold10x_297_pilon-snap-gene-0.21	A0A2H1C6N3|A0A2H1C6N3_FASHE_Ubiquitin--protein_ligase_OS=Fasciola_hepatica_OX=6192_GN=D915_006224_PE=3_SV=1	A0A2H1C6N3	100	4.2e-83	316.2	100	100
maker-scaffold10x_748_pilon-augustus-gene-0.83-mRNA-1_transcript=maker-scaffold10x_748_pilon-augustus-gene-0.83-mRNA-1_gene=maker-scaffold10x_748_pilon-augustus-gene-0.83	A0A2H1C6N8|A0A2H1C6N8_FASHE_DUF3504_domain-containing_protein_OS=Fasciola_hepatica_OX=6192_GN=D915_09852_PE=4_SV=1	A0A2H1C6N8	66.3	0	1170.6	41.4	85.7
maker-scaffold10x_1446_pilon-pred_gff_StringTie-gene-0.3-mRNA-1_transcript=maker-scaffold10x_1446_pilon-pred_gff_StringTie-gene-0.3-mRNA-1_gene=maker-scaffold10x_1446_pilon-pred_gff_StringTie-gene-0.3	A0A2H1C6Q6|A0A2H1C6Q6_FASHE_7_transmembrane_receptor_OS=Fasciola_hepatica_OX=6192_GN=D915_006620_PE=4_SV=1	A0A2H1C6Q6	100	5.2e-246	859	100	100
maker-scaffold10x_362_pilon-snap-gene-0.32-mRNA-1_transcript=maker-scaffold10x_362_pilon-snap-gene-0.32-mRNA-1_gene=maker-scaffold10x_362_pilon-snap-gene-0.32	A0A2H1C6U1|A0A2H1C6U1_FASHE_F-box_domain_protein_OS=Fasciola_hepatica_OX=6192_GN=D915_09854_PE=4_SV=1	A0A2H1C6U1	99.3	5.1e-73	282.7	96.6	100
maker-scaffold10x_525_pilon-snap-gene-0.18-mRNA-1_transcript=maker-scaffold10x_525_pilon-snap-gene-0.18-mRNA-1_gene=maker-scaffold10x_525_pilon-snap-gene-0.18	A0A2H1C6V2|A0A2H1C6V2_FASHE_SOCS_box_OS=Fasciola_hepatica_OX=6192_GN=D915_10500_PE=4_SV=1	A0A2H1C6V2	96.1	5.9e-132	479.6	74.4	85.2
maker-scaffold10x_1373_pilon-snap-gene-0.83-mRNA-1_transcript=maker-scaffold10x_1373_pilon-snap-gene-0.83-mRNA-1_gene=maker-scaffold10x_1373_pilon-snap-gene-0.83	A0A2H1C6X5|A0A2H1C6X5_FASHE_Mbt_repeat_protein_OS=Fasciola_hepatica_OX=6192_GN=D915_09755_PE=4_SV=1	A0A2H1C6X5	88.5	0	1332.8	100	100
maker-scaffold10x_1608_pilon-snap-gene-0.6-mRNA-1_transcript=maker-scaffold10x_1608_pilon-snap-gene-0.6-mRNA-1_gene=maker-scaffold10x_1608_pilon-snap-gene-0.6	A0A2H1C6X5|A0A2H1C6X5_FASHE_Mbt_repeat_protein_OS=Fasciola_hepatica_OX=6192_GN=D915_09755_PE=4_SV=1	A0A2H1C6X5	94.8	0	1482.6	100	100
maker-scaffold10x_1477_pilon-snap-gene-0.12-mRNA-1_transcript=maker-scaffold10x_1477_pilon-snap-gene-0.12-mRNA-1_gene=maker-scaffold10x_1477_pilon-snap-gene-0.12	A0A2H1C6Y5|A0A2H1C6Y5_FASHE_Core-2/I-Branching_enzyme_OS=Fasciola_hepatica_OX=6192_GN=D915_10577_PE=4_SV=1	A0A2H1C6Y5	89.7	1.3e-183	652.1	54.1	80
maker-scaffold10x_1514_pilon-pred_gff_StringTie-gene-0.5-mRNA-1_transcript=maker-scaffold10x_1514_pilon-pred_gff_StringTie-gene-0.5-mRNA-1_gene=maker-scaffold10x_1514_pilon-pred_gff_StringTie-gene-0.5	A0A2H1C6Y5|A0A2H1C6Y5_FASHE_Core-2/I-Branching_enzyme_OS=Fasciola_hepatica_OX=6192_GN=D915_10577_PE=4_SV=1	A0A2H1C6Y5	87.2	5.1e-135	489.6	100	62
maker-scaffold10x_270_pilon-pred_gff_StringTie-gene-0.55-mRNA-1_transcript=maker-scaffold10x_270_pilon-pred_gff_StringTie-gene-0.55-mRNA-1_gene=maker-scaffold10x_270_pilon-pred_gff_StringTie-gene-0.55	A0A2H1C6Y6|A0A2H1C6Y6_FASHE_Ubiquitin_conjugating_enzyme_morgue_OS=Fasciola_hepatica_OX=6192_GN=D915_006339_PE=4_SV=1	A0A2H1C6Y6	100	4e-234	819.3	100	90.6
maker-scaffold10x_292_pilon-augustus-gene-0.55-mRNA-1_transcript=maker-scaffold10x_292_pilon-augustus-gene-0.55-mRNA-1_gene=maker-scaffold10x_292_pilon-augustus-gene-0.55	A0A2H1C6Z8|A0A2H1C6Z8_FASHE_E3_ubiquitin_protein_ligase_OS=Fasciola_hepatica_OX=6192_GN=D915_09740_PE=3_SV=1	A0A2H1C6Z8	100	3.1e-49	203.4	99.1	66.3
maker-scaffold10x_1995_pilon-augustus-gene-0.59-mRNA-1_transcript=maker-scaffold10x_1995_pilon-augustus-gene-0.59-mRNA-1_gene=maker-scaffold10x_1995_pilon-augustus-gene-0.59	A0A2H1C710|A0A2H1C710_FASHE_ABC_transporter,_ATP-binding_protein_OS=Fasciola_hepatica_OX=6192_GN=D915_006346_PE=4_SV=1	A0A2H1C710	99.4	1.4e-176	627.9	98.8	35.5
maker-scaffold10x_158_pilon-pred_gff_StringTie-gene-0.11-mRNA-1_transcript=maker-scaffold10x_158_pilon-pred_gff_StringTie-gene-0.11-mRNA-1_gene=maker-scaffold10x_158_pilon-pred_gff_StringTie-gene-0.11	A0A2H1C729|A0A2H1C729_FASHE_L-lactate_dehydrogenase_OS=Fasciola_hepatica_OX=6192_GN=D915_006510_PE=3_SV=1	A0A2H1C729	99.4	5.8e-178	632.5	100	100
maker-scaffold10x_111_pilon-augustus-gene-0.15-mRNA-1_transcript=maker-scaffold10x_111_pilon-augustus-gene-0.15-mRNA-1_gene=maker-scaffold10x_111_pilon-augustus-gene-0.15	A0A2H1C734|A0A2H1C734_FASHE_Laminin_G_domain_protein_(Fragment)_OS=Fasciola_hepatica_OX=6192_GN=D915_09694_PE=4_SV=1	A0A2H1C734	98.2	0	1270.4	40.9	94.4
snap_masked-scaffold10x_304_pilon-processed-gene-0.13-mRNA-1_transcript=snap_masked-scaffold10x_304_pilon-processed-gene-0.13-mRNA-1_gene=snap_masked-scaffold10x_304_pilon-processed-gene-0.13	A0A2H1C765|A0A2H1C765_FASHE_Synaptophysin_/_synaptoporin_OS=Fasciola_hepatica_OX=6192_GN=D915_09720_PE=4_SV=1	A0A2H1C765	100	2.2e-24	121.7	26.5	29.4
maker-scaffold10x_355_pilon-augustus-gene-0.63-mRNA-1_transcript=maker-scaffold10x_355_pilon-augustus-gene-0.63-mRNA-1_gene=maker-scaffold10x_355_pilon-augustus-gene-0.63	A0A2H1C7A0|A0A2H1C7A0_FASHE_LETM1-like_protein_OS=Fasciola_hepatica_OX=6192_GN=D915_10446_PE=4_SV=1	A0A2H1C7A0	99.7	3.2e-182	646.7	94	97.9
maker-scaffold10x_493_pilon-snap-gene-1.18-mRNA-1_transcript=maker-scaffold10x_493_pilon-snap-gene-1.18-mRNA-1_gene=maker-scaffold10x_493_pilon-snap-gene-1.18	A0A2H1C7A3|A0A2H1C7A3_FASHE_TLC_domain-containing_protein_(Fragment)_OS=Fasciola_hepatica_OX=6192_GN=D915_09628_PE=4_SV=1	A0A2H1C7A3	43.3	9.3e-12	78.2	76.4	48.7
maker-scaffold10x_1656_pilon-augustus-gene-0.19-mRNA-1_transcript=maker-scaffold10x_1656_pilon-augustus-gene-0.19-mRNA-1_gene=maker-scaffold10x_1656_pilon-augustus-gene-0.19	A0A2H1C7D6|A0A2H1C7D6_FASHE_Amine_oxidase_OS=Fasciola_hepatica_OX=6192_GN=D915_006983_PE=4_SV=1	A0A2H1C7D6	100	0	1083.6	93.3	58.4
maker-scaffold10x_23_pilon-snap-gene-0.84-mRNA-1_transcript=maker-scaffold10x_23_pilon-snap-gene-0.84-mRNA-1_gene=maker-scaffold10x_23_pilon-snap-gene-0.84	A0A2H1C7D7|A0A2H1C7D7_FASHE_Endoribonuclease_XendoU_OS=Fasciola_hepatica_OX=6192_GN=D915_09578_PE=4_SV=1	A0A2H1C7D7	96.6	2.6e-58	234.2	63.2	48.8
maker-scaffold10x_1593_pilon-snap-gene-0.39-mRNA-1_transcript=maker-scaffold10x_1593_pilon-snap-gene-0.39-mRNA-1_gene=maker-scaffold10x_1593_pilon-snap-gene-0.39	A0A2H1C7E5|A0A2H1C7E5_FASHE_WIF_domain-containing_protein_OS=Fasciola_hepatica_OX=6192_GN=D915_09562_PE=4_SV=1	A0A2H1C7E5	99.6	2.1e-138	500.7	95.3	35.1
maker-scaffold10x_933_pilon-augustus-gene-0.44-mRNA-1_transcript=maker-scaffold10x_933_pilon-augustus-gene-0.44-mRNA-1_gene=maker-scaffold10x_933_pilon-augustus-gene-0.44	A0A2H1C7E9|A0A2H1C7E9_FASHE_Pyridine_nucleotide-disulfide_oxidoreductase_OS=Fasciola_hepatica_OX=6192_GN=D915_09583_PE=4_SV=1	A0A2H1C7E9	89.3	8.1e-172	612.1	100	73.6
augustus_masked-scaffold10x_1549_pilon-processed-gene-0.0-mRNA-1_transcript=augustus_masked-scaffold10x_1549_pilon-processed-gene-0.0-mRNA-1_gene=augustus_masked-scaffold10x_1549_pilon-processed-gene-0.0	A0A2H1C7F2|A0A2H1C7F2_FASHE_Fructose-bisphosphate_aldolase_OS=Fasciola_hepatica_OX=6192_GN=D915_006642_PE=3_SV=1	A0A2H1C7F2	99.7	1.2e-203	718	100	100
maker-scaffold10x_408_pilon-snap-gene-0.63-mRNA-1_transcript=maker-scaffold10x_408_pilon-snap-gene-0.63-mRNA-1_gene=maker-scaffold10x_408_pilon-snap-gene-0.63	A0A2H1C7G0|A0A2H1C7G0_FASHE_Protein_tyrosine_kinase_OS=Fasciola_hepatica_OX=6192_GN=D915_09569_PE=3_SV=1	A0A2H1C7G0	99.5	0	2211	75.9	99.6
snap_masked-scaffold10x_938_pilon-processed-gene-0.7-mRNA-1_transcript=snap_masked-scaffold10x_938_pilon-processed-gene-0.7-mRNA-1_gene=snap_masked-scaffold10x_938_pilon-processed-gene-0.7	A0A2H1C7G6|A0A2H1C7G6_FASHE_Histone-lysine_N-methyltransferase_SETMAR_OS=Fasciola_hepatica_OX=6192_GN=D915_006175_PE=4_SV=1	A0A2H1C7G6	100	1e-105	391.7	98.4	74.5
maker-scaffold10x_416_pilon-augustus-gene-0.17-mRNA-1_transcript=maker-scaffold10x_416_pilon-augustus-gene-0.17-mRNA-1_gene=maker-scaffold10x_416_pilon-augustus-gene-0.17	A0A2H1C7I2|A0A2H1C7I2_FASHE_Betaine-aldehyde_dehydrogenase_domain_protein_OS=Fasciola_hepatica_OX=6192_GN=D915_10348_PE=4_SV=1	A0A2H1C7I2	99.5	1.7e-105	391	100	100
maker-scaffold10x_784_pilon-augustus-gene-0.17-mRNA-1_transcript=maker-scaffold10x_784_pilon-augustus-gene-0.17-mRNA-1_gene=maker-scaffold10x_784_pilon-augustus-gene-0.17	A0A2H1C7I5|A0A2H1C7I5_FASHE_Helix-loop-helix_DNA-binding_domain_protein_OS=Fasciola_hepatica_OX=6192_GN=D915_09507_PE=4_SV=1	A0A2H1C7I5	98.7	6.2e-130	472.6	86.8	63.2
snap_masked-scaffold10x_784_pilon-processed-gene-0.24-mRNA-1_transcript=snap_masked-scaffold10x_784_pilon-processed-gene-0.24-mRNA-1_gene=snap_masked-scaffold10x_784_pilon-processed-gene-0.24	A0A2H1C7J9|A0A2H1C7J9_FASHE_Kelch_protein_10_OS=Fasciola_hepatica_OX=6192_GN=D915_005676_PE=4_SV=1	A0A2H1C7J9	99	1.3e-252	882.5	47.2	99.4
maker-scaffold10x_391_pilon-snap-gene-0.54-mRNA-1_transcript=maker-scaffold10x_391_pilon-snap-gene-0.54-mRNA-1_gene=maker-scaffold10x_391_pilon-snap-gene-0.54	A0A2H1C7M3|A0A2H1C7M3_FASHE_Ribonuclease_H1/H2_small_subunit_OS=Fasciola_hepatica_OX=6192_GN=D915_006656_PE=4_SV=1	A0A2H1C7M3	99.3	5.8e-71	275.8	100	100
maker-scaffold10x_270_pilon-snap-gene-0.18-mRNA-1_transcript=maker-scaffold10x_270_pilon-snap-gene-0.18-mRNA-1_gene=maker-scaffold10x_270_pilon-snap-gene-0.18	A0A2H1C7P9|A0A2H1C7P9_FASHE_Ion_channel_OS=Fasciola_hepatica_OX=6192_GN=D915_006269_PE=4_SV=1	A0A2H1C7P9	99.3	2.6e-160	575.1	37.8	98.6
maker-scaffold10x_1459_pilon-snap-gene-0.36-mRNA-1_transcript=maker-scaffold10x_1459_pilon-snap-gene-0.36-mRNA-1_gene=maker-scaffold10x_1459_pilon-snap-gene-0.36	A0A2H1C7S1|A0A2H1C7S1_FASHE_DEAD/DEAH_box_helicase_OS=Fasciola_hepatica_OX=6192_GN=D915_006168_PE=4_SV=1	A0A2H1C7S1	100	3.2e-243	849.7	95.8	100
maker-scaffold10x_284_pilon-snap-gene-0.93-mRNA-1_transcript=maker-scaffold10x_284_pilon-snap-gene-0.93-mRNA-1_gene=maker-scaffold10x_284_pilon-snap-gene-0.93	A0A2H1C7S5|A0A2H1C7S5_FASHE_Glutathione_S-transferase_OS=Fasciola_hepatica_OX=6192_GN=D915_006843_PE=3_SV=1	A0A2H1C7S5	99.5	9.1e-113	415.2	100	90.3
maker-scaffold10x_833_pilon-snap-gene-0.21-mRNA-1_transcript=maker-scaffold10x_833_pilon-snap-gene-0.21-mRNA-1_gene=maker-scaffold10x_833_pilon-snap-gene-0.21	A0A2H1C7T8|A0A2H1C7T8_FASHE_PWWP_domain-containing_protein_OS=Fasciola_hepatica_OX=6192_GN=D915_09386_PE=4_SV=1	A0A2H1C7T8	99.8	0	2608.6	98.2	97.6
maker-scaffold10x_2518_pilon-snap-gene-0.26-mRNA-1_transcript=maker-scaffold10x_2518_pilon-snap-gene-0.26-mRNA-1_gene=maker-scaffold10x_2518_pilon-snap-gene-0.26	A0A2H1C7W1|A0A2H1C7W1_FASHE_MSP_domain_protein_OS=Fasciola_hepatica_OX=6192_GN=D915_09397_PE=4_SV=1	A0A2H1C7W1	96.6	4.1e-158	566.6	84.8	94.3
snap_masked-scaffold10x_173_pilon-processed-gene-0.47-mRNA-1_transcript=snap_masked-scaffold10x_173_pilon-processed-gene-0.47-mRNA-1_gene=snap_masked-scaffold10x_173_pilon-processed-gene-0.47	A0A2H1C7W3|A0A2H1C7W3_FASHE_Mov34/MPN/PAD-1_family_protein_OS=Fasciola_hepatica_OX=6192_GN=D915_005906_PE=4_SV=1	A0A2H1C7W3	100	2.3e-214	753.8	86.8	96.9
maker-scaffold10x_1990_pilon-snap-gene-0.6-mRNA-1_transcript=maker-scaffold10x_1990_pilon-snap-gene-0.6-mRNA-1_gene=maker-scaffold10x_1990_pilon-snap-gene-0.6	A0A2H1C7W9|A0A2H1C7W9_FASHE_HTAFII28-like_protein_region_OS=Fasciola_hepatica_OX=6192_GN=D915_16280_PE=4_SV=1	A0A2H1C7W9	83.3	2.9e-86	327	100	100
augustus_masked-scaffold10x_785_pilon-processed-gene-0.0-mRNA-1_transcript=augustus_masked-scaffold10x_785_pilon-processed-gene-0.0-mRNA-1_gene=augustus_masked-scaffold10x_785_pilon-processed-gene-0.0	A0A2H1C7Z0|A0A2H1C7Z0_FASHE_Kinesin-like_protein_OS=Fasciola_hepatica_OX=6192_GN=D915_006797_PE=3_SV=1	A0A2H1C7Z0	100	0	1338.9	100	100
augustus_masked-scaffold10x_1_pilon-processed-gene-0.1-mRNA-1_transcript=augustus_masked-scaffold10x_1_pilon-processed-gene-0.1-mRNA-1_gene=augustus_masked-scaffold10x_1_pilon-processed-gene-0.1	A0A2H1C800|A0A2H1C800_FASHE_Protein_kinase_domain_protein_OS=Fasciola_hepatica_OX=6192_GN=D915_09349_PE=4_SV=1	A0A2H1C800	90.3	6.5e-37	162.2	96.9	55.7
maker-scaffold10x_7_pilon-snap-gene-1.81-mRNA-1_transcript=maker-scaffold10x_7_pilon-snap-gene-1.81-mRNA-1_gene=maker-scaffold10x_7_pilon-snap-gene-1.81	A0A2H1C830|A0A2H1C830_FASHE_H/ACA_ribonucleoprotein_complex_subunit_OS=Fasciola_hepatica_OX=6192_GN=D915_09291_PE=3_SV=1	A0A2H1C830	100	2.9e-136	494.6	51.4	96.9
maker-scaffold10x_474_pilon-pred_gff_StringTie-gene-0.82-mRNA-1_transcript=maker-scaffold10x_474_pilon-pred_gff_StringTie-gene-0.82-mRNA-1_gene=maker-scaffold10x_474_pilon-pred_gff_StringTie-gene-0.82	A0A2H1C837|A0A2H1C837_FASHE_PWWP_domain_protein_OS=Fasciola_hepatica_OX=6192_GN=D915_006067_PE=4_SV=1	A0A2H1C837	99.7	0	1382.9	100	100
maker-scaffold10x_1084_pilon-snap-gene-0.145-mRNA-1_transcript=maker-scaffold10x_1084_pilon-snap-gene-0.145-mRNA-1_gene=maker-scaffold10x_1084_pilon-snap-gene-0.145	A0A2H1C895|A0A2H1C895_FASHE_GMC_oxidoreductase_OS=Fasciola_hepatica_OX=6192_GN=D915_09246_PE=4_SV=1	A0A2H1C895	99.5	1.1e-253	884.4	100	59.5
maker-scaffold10x_204_pilon-snap-gene-0.35-mRNA-1_transcript=maker-scaffold10x_204_pilon-snap-gene-0.35-mRNA-1_gene=maker-scaffold10x_204_pilon-snap-gene-0.35	A0A2H1C899|A0A2H1C899_FASHE_EF_hand_(Fragment)_OS=Fasciola_hepatica_OX=6192_GN=D915_10075_PE=4_SV=1	A0A2H1C899	100	4.8e-78	299.7	86.2	54.5
maker-scaffold10x_401_pilon-snap-gene-0.1-mRNA-1_transcript=maker-scaffold10x_401_pilon-snap-gene-0.1-mRNA-1_gene=maker-scaffold10x_401_pilon-snap-gene-0.1	A0A2H1C8A9|A0A2H1C8A9_FASHE_Peptidyl-tRNA_hydrolase_PTH2_OS=Fasciola_hepatica_OX=6192_GN=D915_10070_PE=4_SV=1	A0A2H1C8A9	100	4.1e-73	283.5	67.8	100
maker-scaffold10x_251_pilon-snap-gene-0.13-mRNA-1_transcript=maker-scaffold10x_251_pilon-snap-gene-0.13-mRNA-1_gene=maker-scaffold10x_251_pilon-snap-gene-0.13	A0A2H1C8B0|A0A2H1C8B0_FASHE_Zinc_finger,_C3HC4_type_OS=Fasciola_hepatica_OX=6192_GN=D915_005861_PE=4_SV=1	A0A2H1C8B0	98.6	1.3e-75	291.6	80.1	63.3
maker-scaffold10x_614_pilon-snap-gene-0.0-mRNA-1_transcript=maker-scaffold10x_614_pilon-snap-gene-0.0-mRNA-1_gene=maker-scaffold10x_614_pilon-snap-gene-0.0	A0A2H1C8B9|A0A2H1C8B9_FASHE_T-box_OS=Fasciola_hepatica_OX=6192_GN=D915_09218_PE=4_SV=1	A0A2H1C8B9	98.5	1.5e-236	828.9	39.1	91.4
maker-scaffold10x_113_pilon-snap-gene-0.193-mRNA-1_transcript=maker-scaffold10x_113_pilon-snap-gene-0.193-mRNA-1_gene=maker-scaffold10x_113_pilon-snap-gene-0.193	A0A2H1C8C8|A0A2H1C8C8_FASHE_GMP-PDE,_delta_subunit_OS=Fasciola_hepatica_OX=6192_GN=D915_006643_PE=4_SV=1	A0A2H1C8C8	59.2	2.2e-37	163.7	100	67.4
snap_masked-scaffold10x_118_pilon-processed-gene-0.20-mRNA-1_transcript=snap_masked-scaffold10x_118_pilon-processed-gene-0.20-mRNA-1_gene=snap_masked-scaffold10x_118_pilon-processed-gene-0.20	A0A2H1C8H9|A0A2H1C8H9_FASHE_Putative_phosphoprotein_phosphatase_1_OS=Fasciola_hepatica_OX=6192_GN=D915_005939_PE=4_SV=1	A0A2H1C8H9	100	1.5e-211	744.2	100	100
maker-scaffold10x_2638_pilon-augustus-gene-0.39-mRNA-1_transcript=maker-scaffold10x_2638_pilon-augustus-gene-0.39-mRNA-1_gene=maker-scaffold10x_2638_pilon-augustus-gene-0.39	A0A2H1C8K1|A0A2H1C8K1_FASHE_Dynein_light_chain_OS=Fasciola_hepatica_OX=6192_GN=D915_006132_PE=3_SV=1	A0A2H1C8K1	100	1e-48	201.4	100	100
maker-scaffold10x_631_pilon-snap-gene-0.24-mRNA-1_transcript=maker-scaffold10x_631_pilon-snap-gene-0.24-mRNA-1_gene=maker-scaffold10x_631_pilon-snap-gene-0.24	A0A2H1C8K3|A0A2H1C8K3_FASHE_Zinc_finger,_C2H2_type_OS=Fasciola_hepatica_OX=6192_GN=D915_09962_PE=4_SV=1	A0A2H1C8K3	100	0	1240.3	61.4	100
maker-scaffold10x_2638_pilon-snap-gene-0.27-mRNA-1_transcript=maker-scaffold10x_2638_pilon-snap-gene-0.27-mRNA-1_gene=maker-scaffold10x_2638_pilon-snap-gene-0.27	A0A2H1C8K6|A0A2H1C8K6_FASHE_Dynein_light_chain_OS=Fasciola_hepatica_OX=6192_GN=D915_09130_PE=3_SV=1	A0A2H1C8K6	90.3	1.9e-40	175.3	38.4	54.7
augustus_masked-scaffold10x_1781_pilon-processed-gene-0.18-mRNA-1_transcript=augustus_masked-scaffold10x_1781_pilon-processed-gene-0.18-mRNA-1_gene=augustus_masked-scaffold10x_1781_pilon-processed-gene-0.18	A0A2H1C8M1|A0A2H1C8M1_FASHE_Dual_specificity_mitogen-activated_protein_kinase_kinase_hemipterous_OS=Fasciola_hepatica_OX=6192_GN=D915_005833_PE=4_SV=1	A0A2H1C8M1	100	1.1e-192	681.4	100	100
maker-scaffold10x_1006_pilon-snap-gene-0.76-mRNA-1_transcript=maker-scaffold10x_1006_pilon-snap-gene-0.76-mRNA-1_gene=maker-scaffold10x_1006_pilon-snap-gene-0.76	A0A2H1C8M7|A0A2H1C8M7_FASHE_EF_hand_OS=Fasciola_hepatica_OX=6192_GN=D915_09163_PE=4_SV=1	A0A2H1C8M7	95.9	2.4e-32	146.7	89	47.4
maker-scaffold10x_8_pilon-augustus-gene-0.17-mRNA-1_transcript=maker-scaffold10x_8_pilon-augustus-gene-0.17-mRNA-1_gene=maker-scaffold10x_8_pilon-augustus-gene-0.17	A0A2H1C8N0|A0A2H1C8N0_FASHE_Tetratricopeptide_repeat_protein_OS=Fasciola_hepatica_OX=6192_GN=D915_09119_PE=4_SV=1	A0A2H1C8N0	96.7	0	2182.1	100	100
maker-scaffold10x_1163_pilon-snap-gene-0.13-mRNA-1_transcript=maker-scaffold10x_1163_pilon-snap-gene-0.13-mRNA-1_gene=maker-scaffold10x_1163_pilon-snap-gene-0.13	A0A2H1C8P3|A0A2H1C8P3_FASHE_ARL2_Bind_BART_domain-containing_protein_OS=Fasciola_hepatica_OX=6192_GN=D915_09093_PE=4_SV=1	A0A2H1C8P3	94.7	6e-52	212.6	79.4	65.5
maker-scaffold10x_596_pilon-pred_gff_StringTie-gene-0.15-mRNA-1_transcript=maker-scaffold10x_596_pilon-pred_gff_StringTie-gene-0.15-mRNA-1_gene=maker-scaffold10x_596_pilon-pred_gff_StringTie-gene-0.15	A0A2H1C8Q1|A0A2H1C8Q1_FASHE_JmjC_domain-containing_protein_OS=Fasciola_hepatica_OX=6192_GN=D915_09073_PE=4_SV=1	A0A2H1C8Q1	100	3.7e-243	849.4	100	100
maker-scaffold10x_8_pilon-snap-gene-0.7-mRNA-1_transcript=maker-scaffold10x_8_pilon-snap-gene-0.7-mRNA-1_gene=maker-scaffold10x_8_pilon-snap-gene-0.7	A0A2H1C8R7|A0A2H1C8R7_FASHE_ZPR1_zinc_finger_domain_protein_OS=Fasciola_hepatica_OX=6192_GN=D915_005837_PE=4_SV=1	A0A2H1C8R7	99.5	1e-249	871.3	100	100
maker-scaffold10x_217_pilon-snap-gene-0.67-mRNA-1_transcript=maker-scaffold10x_217_pilon-snap-gene-0.67-mRNA-1_gene=maker-scaffold10x_217_pilon-snap-gene-0.67	A0A2H1C8T8|A0A2H1C8T8_FASHE_KH_domain_containing_RNA_binding_signal_OS=Fasciola_hepatica_OX=6192_GN=D915_006012_PE=4_SV=1	A0A2H1C8T8	100	7.1e-173	615.5	96.8	100
maker-scaffold10x_720_pilon-augustus-gene-0.104-mRNA-1_transcript=maker-scaffold10x_720_pilon-augustus-gene-0.104-mRNA-1_gene=maker-scaffold10x_720_pilon-augustus-gene-0.104	A0A2H1C8V4|A0A2H1C8V4_FASHE_14_3_3_domain-containing_protein_OS=Fasciola_hepatica_OX=6192_GN=D915_005824_PE=4_SV=1	A0A2H1C8V4	99.5	4e-120	439.9	92.8	92.1
snap_masked-scaffold10x_380_pilon-processed-gene-0.20-mRNA-1_transcript=snap_masked-scaffold10x_380_pilon-processed-gene-0.20-mRNA-1_gene=snap_masked-scaffold10x_380_pilon-processed-gene-0.20	A0A2H1C8W4|A0A2H1C8W4_FASHE_Protein_kinase_domain_protein_OS=Fasciola_hepatica_OX=6192_GN=D915_09736_PE=4_SV=1	A0A2H1C8W4	94.8	3.4e-119	437.2	74.7	63.1
maker-scaffold10x_2152_pilon-snap-gene-0.21-mRNA-1_transcript=maker-scaffold10x_2152_pilon-snap-gene-0.21-mRNA-1_gene=maker-scaffold10x_2152_pilon-snap-gene-0.21	A0A2H1C8W9|A0A2H1C8W9_FASHE_Pyrimidine_5'-nucleotidase_OS=Fasciola_hepatica_OX=6192_GN=D915_09029_PE=4_SV=1	A0A2H1C8W9	93.3	8.3e-148	532.3	83.5	95.2
maker-scaffold10x_58_pilon-snap-gene-0.127-mRNA-1_transcript=maker-scaffold10x_58_pilon-snap-gene-0.127-mRNA-1_gene=maker-scaffold10x_58_pilon-snap-gene-0.127	A0A2H1C8Y9|A0A2H1C8Y9_FASHE_Glycerol-3-phosphate_dehydrogenase_[NAD(+)]_OS=Fasciola_hepatica_OX=6192_GN=D915_09718_PE=3_SV=1	A0A2H1C8Y9	98.7	1.5e-173	617.8	92.8	100
snap_masked-scaffold10x_280_pilon-processed-gene-0.38-mRNA-1_transcript=snap_masked-scaffold10x_280_pilon-processed-gene-0.38-mRNA-1_gene=snap_masked-scaffold10x_280_pilon-processed-gene-0.38	A0A2H1C910|A0A2H1C910_FASHE_GTP_cyclohydrolase_I_OS=Fasciola_hepatica_OX=6192_GN=D915_08943_PE=3_SV=1	A0A2H1C910	100	1.2e-250	874.4	100	97.6
maker-scaffold10x_280_pilon-snap-gene-0.135-mRNA-1_transcript=maker-scaffold10x_280_pilon-snap-gene-0.135-mRNA-1_gene=maker-scaffold10x_280_pilon-snap-gene-0.135	A0A2H1C932|A0A2H1C932_FASHE_GTP_cyclohydrolase_I_OS=Fasciola_hepatica_OX=6192_GN=D915_005609_PE=3_SV=1	A0A2H1C932	99.7	4e-218	766.1	99.5	98
maker-scaffold10x_680_pilon-pred_gff_StringTie-gene-0.36-mRNA-1_transcript=maker-scaffold10x_680_pilon-pred_gff_StringTie-gene-0.36-mRNA-1_gene=maker-scaffold10x_680_pilon-pred_gff_StringTie-gene-0.36	A0A2H1C935|A0A2H1C935_FASHE_Enkurin_TRPC_channel_interacting_protein_OS=Fasciola_hepatica_OX=6192_GN=D915_005711_PE=4_SV=1	A0A2H1C935	99.7	2.3e-193	683.7	100	100
maker-scaffold10x_217_pilon-snap-gene-1.113-mRNA-1_transcript=maker-scaffold10x_217_pilon-snap-gene-1.113-mRNA-1_gene=maker-scaffold10x_217_pilon-snap-gene-1.113	A0A2H1C937|A0A2H1C937_FASHE_ADP-ribosylation_factor_family_protein_(Fragment)_OS=Fasciola_hepatica_OX=6192_GN=D915_08931_PE=4_SV=1	A0A2H1C937	99.5	4.5e-303	1048.9	97.3	98.4
maker-scaffold10x_345_pilon-snap-gene-1.105-mRNA-1_transcript=maker-scaffold10x_345_pilon-snap-gene-1.105-mRNA-1_gene=maker-scaffold10x_345_pilon-snap-gene-1.105	A0A2H1C992|A0A2H1C992_FASHE_MYND_finger_OS=Fasciola_hepatica_OX=6192_GN=D915_08849_PE=4_SV=1	A0A2H1C992	80.4	0	2167.9	100	97.2
maker-scaffold10x_1304_pilon-snap-gene-0.41-mRNA-1_transcript=maker-scaffold10x_1304_pilon-snap-gene-0.41-mRNA-1_gene=maker-scaffold10x_1304_pilon-snap-gene-0.41	A0A2H1C9A7|A0A2H1C9A7_FASHE_RT_RNaseH_domain-containing_protein_OS=Fasciola_hepatica_OX=6192_GN=D915_08839_PE=4_SV=1	A0A2H1C9A7	98.2	9.2e-212	746.5	35.7	65
maker-scaffold10x_2003_pilon-snap-gene-0.20-mRNA-1_transcript=maker-scaffold10x_2003_pilon-snap-gene-0.20-mRNA-1_gene=maker-scaffold10x_2003_pilon-snap-gene-0.20	A0A2H1C9A8|A0A2H1C9A8_FASHE_Domain_found_in_IF2B/IF5_OS=Fasciola_hepatica_OX=6192_GN=D915_08850_PE=4_SV=1	A0A2H1C9A8	98.9	5.9e-234	818.9	100	100
maker-scaffold10x_80_pilon-pred_gff_StringTie-gene-0.91-mRNA-1_transcript=maker-scaffold10x_80_pilon-pred_gff_StringTie-gene-0.91-mRNA-1_gene=maker-scaffold10x_80_pilon-pred_gff_StringTie-gene-0.91	A0A2H1C9E3|A0A2H1C9E3_FASHE_Coiled-coil_domain-containing_protein_96_OS=Fasciola_hepatica_OX=6192_GN=D915_005798_PE=4_SV=1	A0A2H1C9E3	100	2.9e-200	706.8	100	68.4
maker-scaffold10x_1573_pilon-pred_gff_StringTie-gene-0.52-mRNA-1_transcript=maker-scaffold10x_1573_pilon-pred_gff_StringTie-gene-0.52-mRNA-1_gene=maker-scaffold10x_1573_pilon-pred_gff_StringTie-gene-0.52	A0A2H1C9E8|A0A2H1C9E8_FASHE_Bone_marrow_proteoglycan_OS=Fasciola_hepatica_OX=6192_GN=D915_005862_PE=4_SV=1	A0A2H1C9E8	100	1.9e-147	530.8	98.1	100
maker-scaffold10x_531_pilon-snap-gene-0.31-mRNA-1_transcript=maker-scaffold10x_531_pilon-snap-gene-0.31-mRNA-1_gene=maker-scaffold10x_531_pilon-snap-gene-0.31	A0A2H1C9H5|A0A2H1C9H5_FASHE_Protein_kinase_domain-containing_protein_OS=Fasciola_hepatica_OX=6192_GN=D915_005846_PE=4_SV=1	A0A2H1C9H5	99.4	4.7e-196	693.3	63.4	95.3
maker-scaffold10x_538_pilon-snap-gene-0.114-mRNA-1_transcript=maker-scaffold10x_538_pilon-snap-gene-0.114-mRNA-1_gene=maker-scaffold10x_538_pilon-snap-gene-0.114	A0A2H1C9J0|A0A2H1C9J0_FASHE_Coiled-coil_domain-containing_protein_94_OS=Fasciola_hepatica_OX=6192_GN=D915_005448_PE=4_SV=1	A0A2H1C9J0	100	8.9e-177	628.6	100	100
maker-scaffold10x_2462_pilon-snap-gene-0.29-mRNA-1_transcript=maker-scaffold10x_2462_pilon-snap-gene-0.29-mRNA-1_gene=maker-scaffold10x_2462_pilon-snap-gene-0.29	A0A2H1C9L1|A0A2H1C9L1_FASHE_Zinc_carboxypeptidase_OS=Fasciola_hepatica_OX=6192_GN=D915_08802_PE=4_SV=1	A0A2H1C9L1	99.4	0	2241.5	94.8	97.2
maker-scaffold10x_380_pilon-snap-gene-0.3-mRNA-1_transcript=maker-scaffold10x_380_pilon-snap-gene-0.3-mRNA-1_gene=maker-scaffold10x_380_pilon-snap-gene-0.3	A0A2H1C9L6|A0A2H1C9L6_FASHE_Basic_region_leucine_zipper_OS=Fasciola_hepatica_OX=6192_GN=D915_005439_PE=4_SV=1	A0A2H1C9L6	81.9	2.8e-117	430.6	100	100
maker-scaffold10x_1299_pilon-pred_gff_StringTie-gene-0.1-mRNA-1_transcript=maker-scaffold10x_1299_pilon-pred_gff_StringTie-gene-0.1-mRNA-1_gene=maker-scaffold10x_1299_pilon-pred_gff_StringTie-gene-0.1	A0A2H1C9M4|A0A2H1C9M4_FASHE_FAD_dependent_oxidoreductase_OS=Fasciola_hepatica_OX=6192_GN=D915_09458_PE=4_SV=1	A0A2H1C9M4	98.7	4.6e-269	935.6	100	100
maker-scaffold10x_720_pilon-snap-gene-0.7-mRNA-1_transcript=maker-scaffold10x_720_pilon-snap-gene-0.7-mRNA-1_gene=maker-scaffold10x_720_pilon-snap-gene-0.7	A0A2H1C9Q2|A0A2H1C9Q2_FASHE_Glucose-regulated_protein_78_OS=Fasciola_hepatica_OX=6192_GN=D915_006307_PE=3_SV=1	A0A2H1C9Q2	59.7	6.1e-179	636.3	78.5	99.2
snap_masked-scaffold10x_1382_pilon-processed-gene-0.77-mRNA-1_transcript=snap_masked-scaffold10x_1382_pilon-processed-gene-0.77-mRNA-1_gene=snap_masked-scaffold10x_1382_pilon-processed-gene-0.77	A0A2H1C9S1|A0A2H1C9S1_FASHE_Proteasome_activator_complex_subunit_3_OS=Fasciola_hepatica_OX=6192_GN=D915_005765_PE=4_SV=1	A0A2H1C9S1	100	3.4e-124	453.4	100	100
maker-scaffold10x_464_pilon-augustus-gene-0.105-mRNA-1_transcript=maker-scaffold10x_464_pilon-augustus-gene-0.105-mRNA-1_gene=maker-scaffold10x_464_pilon-augustus-gene-0.105	A0A2H1C9S8|A0A2H1C9S8_FASHE_EF_hand_OS=Fasciola_hepatica_OX=6192_GN=D915_004312_PE=4_SV=1	A0A2H1C9S8	100	4e-44	186	100	87.4
maker-scaffold10x_292_pilon-snap-gene-0.13-mRNA-1_transcript=maker-scaffold10x_292_pilon-snap-gene-0.13-mRNA-1_gene=maker-scaffold10x_292_pilon-snap-gene-0.13	A0A2H1C9U3|A0A2H1C9U3_FASHE_SKIP/SNW_domain_protein_OS=Fasciola_hepatica_OX=6192_GN=D915_005336_PE=4_SV=1	A0A2H1C9U3	100	1.9e-295	1023.5	100	100
maker-scaffold10x_1080_pilon-augustus-gene-0.2-mRNA-1_transcript=maker-scaffold10x_1080_pilon-augustus-gene-0.2-mRNA-1_gene=maker-scaffold10x_1080_pilon-augustus-gene-0.2	A0A2H1C9U6|A0A2H1C9U6_FASHE_RNase3_domain_protein_OS=Fasciola_hepatica_OX=6192_GN=D915_08656_PE=4_SV=1	A0A2H1C9U6	99.1	1.1e-190	675.6	56.1	94.9
maker-scaffold10x_71_pilon-pred_gff_StringTie-gene-0.80-mRNA-1_transcript=maker-scaffold10x_71_pilon-pred_gff_StringTie-gene-0.80-mRNA-1_gene=maker-scaffold10x_71_pilon-pred_gff_StringTie-gene-0.80	A0A2H1C9X7|A0A2H1C9X7_FASHE_U6_snRNA-associated_Sm-like_protein_LSm2_OS=Fasciola_hepatica_OX=6192_GN=D915_005703_PE=3_SV=1	A0A2H1C9X7	90.9	6.9e-10	71.6	57.9	33.7
maker-scaffold10x_17_pilon-snap-gene-0.3-mRNA-1_transcript=maker-scaffold10x_17_pilon-snap-gene-0.3-mRNA-1_gene=maker-scaffold10x_17_pilon-snap-gene-0.3	A0A2H1C9Z3|A0A2H1C9Z3_FASHE_Core-2/I-Branching_enzyme_OS=Fasciola_hepatica_OX=6192_GN=D915_005454_PE=4_SV=1	A0A2H1C9Z3	99.7	7e-221	775.4	90.8	96.7
maker-scaffold10x_1639_pilon-snap-gene-0.5-mRNA-1_transcript=maker-scaffold10x_1639_pilon-snap-gene-0.5-mRNA-1_gene=maker-scaffold10x_1639_pilon-snap-gene-0.5	A0A2H1CA11|A0A2H1CA11_FASHE_14-3-3_protein_OS=Fasciola_hepatica_OX=6192_GN=D915_08576_PE=3_SV=1	A0A2H1CA11	99.6	2.2e-123	451.1	79.2	90.1
maker-scaffold10x_431_pilon-snap-gene-0.71-mRNA-1_transcript=maker-scaffold10x_431_pilon-snap-gene-0.71-mRNA-1_gene=maker-scaffold10x_431_pilon-snap-gene-0.71	A0A2H1CA21|A0A2H1CA21_FASHE_FYVE_zinc_finger_OS=Fasciola_hepatica_OX=6192_GN=D915_08586_PE=4_SV=1	A0A2H1CA21	98.1	6.1e-39	169.1	98.2	24.7
maker-scaffold10x_1639_pilon-snap-gene-0.12-mRNA-1_transcript=maker-scaffold10x_1639_pilon-snap-gene-0.12-mRNA-1_gene=maker-scaffold10x_1639_pilon-snap-gene-0.12	A0A2H1CA24|A0A2H1CA24_FASHE_Papain_family_cysteine_protease_OS=Fasciola_hepatica_OX=6192_GN=D915_005527_PE=3_SV=1	A0A2H1CA24	97.2	4e-187	662.9	100	100
maker-scaffold10x_503_pilon-pred_gff_StringTie-gene-0.116-mRNA-1_transcript=maker-scaffold10x_503_pilon-pred_gff_StringTie-gene-0.116-mRNA-1_gene=maker-scaffold10x_503_pilon-pred_gff_StringTie-gene-0.116	A0A2H1CA34|A0A2H1CA34_FASHE_Stress_response_protein_nhaX_OS=Fasciola_hepatica_OX=6192_GN=D915_005208_PE=4_SV=1	A0A2H1CA34	100	5.3e-90	339.3	100	100
maker-scaffold10x_418_pilon-augustus-gene-0.104-mRNA-1_transcript=maker-scaffold10x_418_pilon-augustus-gene-0.104-mRNA-1_gene=maker-scaffold10x_418_pilon-augustus-gene-0.104	A0A2H1CA36|A0A2H1CA36_FASHE_Putative_Cleavage_and_polyadenylation_specificity_factor_OS=Fasciola_hepatica_OX=6192_GN=D915_005572_PE=4_SV=1	A0A2H1CA36	99.7	2e-192	680.6	100	100
snap_masked-scaffold10x_732_pilon-processed-gene-0.57-mRNA-1_transcript=snap_masked-scaffold10x_732_pilon-processed-gene-0.57-mRNA-1_gene=snap_masked-scaffold10x_732_pilon-processed-gene-0.57	A0A2H1CA67|A0A2H1CA67_FASHE_Zinc_finger_protein_OS=Fasciola_hepatica_OX=6192_GN=D915_005692_PE=4_SV=1	A0A2H1CA67	95.1	3.3e-265	923.3	96.2	100
maker-scaffold10x_353_pilon-snap-gene-0.50-mRNA-1_transcript=maker-scaffold10x_353_pilon-snap-gene-0.50-mRNA-1_gene=maker-scaffold10x_353_pilon-snap-gene-0.50	A0A2H1CA92|A0A2H1CA92_FASHE_Ring_finger_protein_OS=Fasciola_hepatica_OX=6192_GN=D915_005576_PE=4_SV=1	A0A2H1CA92	99.3	2.4e-145	523.9	100	100
maker-scaffold10x_719_pilon-snap-gene-0.2-mRNA-1_transcript=maker-scaffold10x_719_pilon-snap-gene-0.2-mRNA-1_gene=maker-scaffold10x_719_pilon-snap-gene-0.2	A0A2H1CA94|A0A2H1CA94_FASHE_SNARE_domain_protein_OS=Fasciola_hepatica_OX=6192_GN=D915_08506_PE=3_SV=1	A0A2H1CA94	100	2.7e-88	334	82.8	88.3
maker-scaffold10x_1637_pilon-snap-gene-0.24-mRNA-1_transcript=maker-scaffold10x_1637_pilon-snap-gene-0.24-mRNA-1_gene=maker-scaffold10x_1637_pilon-snap-gene-0.24	A0A2H1CAC6|A0A2H1CAC6_FASHE_Zinc_finger,_C2H2_type_OS=Fasciola_hepatica_OX=6192_GN=D915_09290_PE=4_SV=1	A0A2H1CAC6	100	1.7e-28	134.8	43.3	29.3
maker-scaffold10x_56_pilon-augustus-gene-0.106-mRNA-1_transcript=maker-scaffold10x_56_pilon-augustus-gene-0.106-mRNA-1_gene=maker-scaffold10x_56_pilon-augustus-gene-0.106	A0A2H1CAF2|A0A2H1CAF2_FASHE_Papain_family_cysteine_protease_OS=Fasciola_hepatica_OX=6192_GN=D915_08407_PE=3_SV=1	A0A2H1CAF2	96.8	2e-197	697.2	100	100
maker-scaffold10x_173_pilon-snap-gene-0.12-mRNA-1_transcript=maker-scaffold10x_173_pilon-snap-gene-0.12-mRNA-1_gene=maker-scaffold10x_173_pilon-snap-gene-0.12	A0A2H1CAG9|A0A2H1CAG9_FASHE_Ser/Thr_phosphatase_family_protein_OS=Fasciola_hepatica_OX=6192_GN=D915_005755_PE=4_SV=1	A0A2H1CAG9	99.7	6.3e-183	650.6	30.9	99
maker-scaffold10x_1499_pilon-snap-gene-0.19-mRNA-1_transcript=maker-scaffold10x_1499_pilon-snap-gene-0.19-mRNA-1_gene=maker-scaffold10x_1499_pilon-snap-gene-0.19	A0A2H1CAH8|A0A2H1CAH8_FASHE_Cofilin/tropomyosin-type_actin-binding_protein_OS=Fasciola_hepatica_OX=6192_GN=D915_005116_PE=3_SV=1	A0A2H1CAH8	100	2.8e-70	273.5	100	100
maker-scaffold10x_436_pilon-snap-gene-0.28-mRNA-1_transcript=maker-scaffold10x_436_pilon-snap-gene-0.28-mRNA-1_gene=maker-scaffold10x_436_pilon-snap-gene-0.28	A0A2H1CAI2|A0A2H1CAI2_FASHE_Ankyrin_repeat_protein_OS=Fasciola_hepatica_OX=6192_GN=D915_08405_PE=4_SV=1	A0A2H1CAI2	100	1.9e-71	278.1	100	100
snap_masked-scaffold10x_317_pilon-processed-gene-0.41-mRNA-1_transcript=snap_masked-scaffold10x_317_pilon-processed-gene-0.41-mRNA-1_gene=snap_masked-scaffold10x_317_pilon-processed-gene-0.41	A0A2H1CAK4|A0A2H1CAK4_FASHE_ABC_transporter,_ATP-binding_protein_OS=Fasciola_hepatica_OX=6192_GN=D915_08359_PE=4_SV=1	A0A2H1CAK4	99.9	0	3207.9	100	100
maker-scaffold10x_318_pilon-snap-gene-0.88-mRNA-1_transcript=maker-scaffold10x_318_pilon-snap-gene-0.88-mRNA-1_gene=maker-scaffold10x_318_pilon-snap-gene-0.88	A0A2H1CAP0|A0A2H1CAP0_FASHE_tRNA_(guanine(26)-N(2))-dimethyltransferase_(Fragment)_OS=Fasciola_hepatica_OX=6192_GN=D915_09052_PE=3_SV=1	A0A2H1CAP0	98.1	1.3e-264	921.4	71.3	90.3
augustus_masked-scaffold10x_13_pilon-processed-gene-2.85-mRNA-1_transcript=augustus_masked-scaffold10x_13_pilon-processed-gene-2.85-mRNA-1_gene=augustus_masked-scaffold10x_13_pilon-processed-gene-2.85	A0A2H1CAR7|A0A2H1CAR7_FASHE_EF_hand_OS=Fasciola_hepatica_OX=6192_GN=D915_08299_PE=4_SV=1	A0A2H1CAR7	100	5.5e-54	219.5	100	98.1
maker-scaffold10x_476_pilon-snap-gene-0.101-mRNA-1_transcript=maker-scaffold10x_476_pilon-snap-gene-0.101-mRNA-1_gene=maker-scaffold10x_476_pilon-snap-gene-0.101	A0A2H1CAT3|A0A2H1CAT3_FASHE_DM_DNA_binding_domain_protein_OS=Fasciola_hepatica_OX=6192_GN=D915_09108_PE=4_SV=1	A0A2H1CAT3	99.3	6.4e-146	526.9	44.8	24.3
maker-scaffold10x_102_pilon-snap-gene-0.75-mRNA-1_transcript=maker-scaffold10x_102_pilon-snap-gene-0.75-mRNA-1_gene=maker-scaffold10x_102_pilon-snap-gene-0.75	A0A2H1CAV1|A0A2H1CAV1_FASHE_Emp24/gp25L/p24_family_protein_OS=Fasciola_hepatica_OX=6192_GN=D915_005401_PE=3_SV=1	A0A2H1CAV1	100	5.6e-107	396	100	100
maker-scaffold10x_1662_pilon-snap-gene-0.0-mRNA-1_transcript=maker-scaffold10x_1662_pilon-snap-gene-0.0-mRNA-1_gene=maker-scaffold10x_1662_pilon-snap-gene-0.0	A0A2H1CAV3|A0A2H1CAV3_FASHE_Tetratricopeptide_repeat_protein_OS=Fasciola_hepatica_OX=6192_GN=D915_08278_PE=4_SV=1	A0A2H1CAV3	99.5	0	1218.8	77.4	96.3
maker-scaffold10x_1424_pilon-snap-gene-0.10-mRNA-1_transcript=maker-scaffold10x_1424_pilon-snap-gene-0.10-mRNA-1_gene=maker-scaffold10x_1424_pilon-snap-gene-0.10	A0A2H1CAX0|A0A2H1CAX0_FASHE_Ankyrin_repeat_protein_OS=Fasciola_hepatica_OX=6192_GN=D915_08260_PE=4_SV=1	A0A2H1CAX0	98.6	0	1717.2	44.9	100
maker-scaffold10x_933_pilon-snap-gene-0.92-mRNA-1_transcript=maker-scaffold10x_933_pilon-snap-gene-0.92-mRNA-1_gene=maker-scaffold10x_933_pilon-snap-gene-0.92	A0A2H1CB13|A0A2H1CB13_FASHE_Adenosylhomocysteinase_(Fragment)_OS=Fasciola_hepatica_OX=6192_GN=D915_08193_PE=3_SV=1	A0A2H1CB13	97.3	8.4e-255	888.3	96.2	91.1
maker-scaffold10x_7_pilon-snap-gene-1.88-mRNA-1_transcript=maker-scaffold10x_7_pilon-snap-gene-1.88-mRNA-1_gene=maker-scaffold10x_7_pilon-snap-gene-1.88	A0A2H1CB31|A0A2H1CB31_FASHE_Tetratricopeptide_repeat_protein_OS=Fasciola_hepatica_OX=6192_GN=D915_08201_PE=4_SV=1	A0A2H1CB31	98.9	3.3e-235	823.2	99.1	99.3
augustus_masked-scaffold10x_387_pilon-processed-gene-0.18-mRNA-1_transcript=augustus_masked-scaffold10x_387_pilon-processed-gene-0.18-mRNA-1_gene=augustus_masked-scaffold10x_387_pilon-processed-gene-0.18	A0A2H1CB35|A0A2H1CB35_FASHE_PDZ_domain-containing_protein_OS=Fasciola_hepatica_OX=6192_GN=D915_08172_PE=4_SV=1	A0A2H1CB35	84	0	1115.5	57.1	88.2
maker-scaffold10x_1364_pilon-augustus-gene-0.6-mRNA-1_transcript=maker-scaffold10x_1364_pilon-augustus-gene-0.6-mRNA-1_gene=maker-scaffold10x_1364_pilon-augustus-gene-0.6	A0A2H1CB52|A0A2H1CB52_FASHE_Zn-finger_in_Ran_binding_protein_OS=Fasciola_hepatica_OX=6192_GN=D915_08190_PE=4_SV=1	A0A2H1CB52	99	0	1888.6	100	100
maker-scaffold10x_720_pilon-snap-gene-0.16-mRNA-1_transcript=maker-scaffold10x_720_pilon-snap-gene-0.16-mRNA-1_gene=maker-scaffold10x_720_pilon-snap-gene-0.16	A0A2H1CB60|A0A2H1CB60_FASHE_Histone_deacetylase_OS=Fasciola_hepatica_OX=6192_GN=D915_08882_PE=3_SV=1	A0A2H1CB60	100	5.2e-303	1048.5	100	91.8
maker-scaffold10x_22_pilon-snap-gene-0.120-mRNA-1_transcript=maker-scaffold10x_22_pilon-snap-gene-0.120-mRNA-1_gene=maker-scaffold10x_22_pilon-snap-gene-0.120	A0A2H1CB73|A0A2H1CB73_FASHE_Cytochrome_c_oxidase_polypeptide_OS=Fasciola_hepatica_OX=6192_GN=D915_005442_PE=4_SV=1	A0A2H1CB73	100	1.2e-88	334.7	100	100
maker-scaffold10x_487_pilon-snap-gene-0.218-mRNA-1_transcript=maker-scaffold10x_487_pilon-snap-gene-0.218-mRNA-1_gene=maker-scaffold10x_487_pilon-snap-gene-0.218	A0A2H1CB95|A0A2H1CB95_FASHE_Tetraspanin_family_protein_OS=Fasciola_hepatica_OX=6192_GN=D915_08146_PE=3_SV=1	A0A2H1CB95	100	5.9e-53	216.9	46.3	75.6
maker-scaffold10x_1500_pilon-augustus-gene-0.6-mRNA-1_transcript=maker-scaffold10x_1500_pilon-augustus-gene-0.6-mRNA-1_gene=maker-scaffold10x_1500_pilon-augustus-gene-0.6	A0A2H1CBA7|A0A2H1CBA7_FASHE_Serine/threonine-protein_phosphatase_OS=Fasciola_hepatica_OX=6192_GN=D915_005130_PE=3_SV=1	A0A2H1CBA7	100	1.2e-182	647.9	100	100
maker-scaffold10x_783_pilon-augustus-gene-0.27-mRNA-1_transcript=maker-scaffold10x_783_pilon-augustus-gene-0.27-mRNA-1_gene=maker-scaffold10x_783_pilon-augustus-gene-0.27	A0A2H1CBB5|A0A2H1CBB5_FASHE_Ferritin_OS=Fasciola_hepatica_OX=6192_GN=D915_005474_PE=3_SV=1	A0A2H1CBB5	100	2e-89	337.4	100	100
maker-scaffold10x_1445_pilon-snap-gene-0.65-mRNA-1_transcript=maker-scaffold10x_1445_pilon-snap-gene-0.65-mRNA-1_gene=maker-scaffold10x_1445_pilon-snap-gene-0.65	A0A2H1CBB6|A0A2H1CBB6_FASHE_U4/U6,U5_tri-snRNP-associated_protein_2_OS=Fasciola_hepatica_OX=6192_GN=D915_005080_PE=4_SV=1	A0A2H1CBB6	100	0	1172.5	100	100
maker-scaffold10x_1399_pilon-snap-gene-0.15-mRNA-1_transcript=maker-scaffold10x_1399_pilon-snap-gene-0.15-mRNA-1_gene=maker-scaffold10x_1399_pilon-snap-gene-0.15	A0A2H1CBD0|A0A2H1CBD0_FASHE_Leucine_Rich_repeat-containing_domain_protein_OS=Fasciola_hepatica_OX=6192_GN=D915_08076_PE=4_SV=1	A0A2H1CBD0	99.8	0	2404.4	98.4	96.3
snap_masked-scaffold10x_314_pilon-processed-gene-0.26-mRNA-1_transcript=snap_masked-scaffold10x_314_pilon-processed-gene-0.26-mRNA-1_gene=snap_masked-scaffold10x_314_pilon-processed-gene-0.26	A0A2H1CBD2|A0A2H1CBD2_FASHE_Ankyrin_repeat_protein_OS=Fasciola_hepatica_OX=6192_GN=D915_005305_PE=4_SV=1	A0A2H1CBD2	100	3.7e-60	240.4	82	82
maker-scaffold10x_670_pilon-snap-gene-0.0-mRNA-1_transcript=maker-scaffold10x_670_pilon-snap-gene-0.0-mRNA-1_gene=maker-scaffold10x_670_pilon-snap-gene-0.0	A0A2H1CBG3|A0A2H1CBG3_FASHE_U1_zinc_finger_OS=Fasciola_hepatica_OX=6192_GN=D915_005313_PE=4_SV=1	A0A2H1CBG3	100	4.3e-96	359.8	99	97.9
augustus_masked-scaffold10x_1084_pilon-processed-gene-0.111-mRNA-1_transcript=augustus_masked-scaffold10x_1084_pilon-processed-gene-0.111-mRNA-1_gene=augustus_masked-scaffold10x_1084_pilon-processed-gene-0.111	A0A2H1CBI3|A0A2H1CBI3_FASHE_DnaK_family_protein_OS=Fasciola_hepatica_OX=6192_GN=D915_08022_PE=3_SV=1	A0A2H1CBI3	65.1	7.9e-154	552.4	97.6	99
maker-scaffold10x_457_pilon-snap-gene-0.53-mRNA-1_transcript=maker-scaffold10x_457_pilon-snap-gene-0.53-mRNA-1_gene=maker-scaffold10x_457_pilon-snap-gene-0.53	A0A2H1CBK3|A0A2H1CBK3_FASHE_Zinc_finger,_C2H2_type_OS=Fasciola_hepatica_OX=6192_GN=D915_08058_PE=4_SV=1	A0A2H1CBK3	92.7	4.2e-198	700.7	48.1	77.8
maker-scaffold10x_312_pilon-snap-gene-0.11-mRNA-1_transcript=maker-scaffold10x_312_pilon-snap-gene-0.11-mRNA-1_gene=maker-scaffold10x_312_pilon-snap-gene-0.11	A0A2H1CBK4|A0A2H1CBK4_FASHE_Cadherin_domain_protein_OS=Fasciola_hepatica_OX=6192_GN=D915_08028_PE=4_SV=1	A0A2H1CBK4	97.7	0	2143.2	76.8	93.4
maker-scaffold10x_1040_pilon-augustus-gene-0.36-mRNA-1_transcript=maker-scaffold10x_1040_pilon-augustus-gene-0.36-mRNA-1_gene=maker-scaffold10x_1040_pilon-augustus-gene-0.36	A0A2H1CBL2|A0A2H1CBL2_FASHE_PDZ/DHR/GLGF_domain_protein_OS=Fasciola_hepatica_OX=6192_GN=D915_08001_PE=4_SV=1	A0A2H1CBL2	96.3	3.8e-112	413.3	95.5	54.7
maker-scaffold10x_99_pilon-snap-gene-0.90-mRNA-1_transcript=maker-scaffold10x_99_pilon-snap-gene-0.90-mRNA-1_gene=maker-scaffold10x_99_pilon-snap-gene-0.90	A0A2H1CBX0|A0A2H1CBX0_FASHE_HIT_zinc_finger_OS=Fasciola_hepatica_OX=6192_GN=D915_005267_PE=4_SV=1	A0A2H1CBX0	100	6.5e-79	302.4	100	100
snap_masked-scaffold10x_392_pilon-processed-gene-0.49-mRNA-1_transcript=snap_masked-scaffold10x_392_pilon-processed-gene-0.49-mRNA-1_gene=snap_masked-scaffold10x_392_pilon-processed-gene-0.49	A0A2H1CBX4|A0A2H1CBX4_FASHE_Transporter,_cation_channel_family_protein_OS=Fasciola_hepatica_OX=6192_GN=D915_004976_PE=4_SV=1	A0A2H1CBX4	100	0	1494.2	100	100
maker-scaffold10x_432_pilon-snap-gene-0.124-mRNA-1_transcript=maker-scaffold10x_432_pilon-snap-gene-0.124-mRNA-1_gene=maker-scaffold10x_432_pilon-snap-gene-0.124	A0A2H1CBY4|A0A2H1CBY4_FASHE_Tektin_family_protein_OS=Fasciola_hepatica_OX=6192_GN=D915_07851_PE=4_SV=1	A0A2H1CBY4	95.9	6.5e-106	392.5	100	40.7
maker-scaffold10x_513_pilon-snap-gene-1.152-mRNA-1_transcript=maker-scaffold10x_513_pilon-snap-gene-1.152-mRNA-1_gene=maker-scaffold10x_513_pilon-snap-gene-1.152	A0A2H1CC33|A0A2H1CC33_FASHE_Ig-like_domain-containing_protein_OS=Fasciola_hepatica_OX=6192_GN=D915_08550_PE=4_SV=1	A0A2H1CC33	44.1	7.5e-27	129.4	73.9	26.7
maker-scaffold10x_149_pilon-snap-gene-0.93-mRNA-1_transcript=maker-scaffold10x_149_pilon-snap-gene-0.93-mRNA-1_gene=maker-scaffold10x_149_pilon-snap-gene-0.93	A0A2H1CC35|A0A2H1CC35_FASHE_VWFA_domain-containing_protein_OS=Fasciola_hepatica_OX=6192_GN=D915_07798_PE=4_SV=1	A0A2H1CC35	98.3	0	2007.3	94.5	87.8
snap_masked-scaffold10x_188_pilon-processed-gene-0.5-mRNA-1_transcript=snap_masked-scaffold10x_188_pilon-processed-gene-0.5-mRNA-1_gene=snap_masked-scaffold10x_188_pilon-processed-gene-0.5	A0A2H1CC47|A0A2H1CC47_FASHE_Monocarboxylate_transporter_5_OS=Fasciola_hepatica_OX=6192_GN=D915_004778_PE=4_SV=1	A0A2H1CC47	99.8	1.7e-266	927.2	100	100
maker-scaffold10x_502_pilon-snap-gene-0.44-mRNA-1_transcript=maker-scaffold10x_502_pilon-snap-gene-0.44-mRNA-1_gene=maker-scaffold10x_502_pilon-snap-gene-0.44	A0A2H1CC81|A0A2H1CC81_FASHE_Actin_OS=Fasciola_hepatica_OX=6192_GN=D915_004890_PE=3_SV=1	A0A2H1CC81	100	1e-128	468.4	100	61.2
maker-scaffold10x_103_pilon-pred_gff_StringTie-gene-0.5-mRNA-1_transcript=maker-scaffold10x_103_pilon-pred_gff_StringTie-gene-0.5-mRNA-1_gene=maker-scaffold10x_103_pilon-pred_gff_StringTie-gene-0.5	A0A2H1CC82|A0A2H1CC82_FASHE_Thioredoxin-like_protein_OS=Fasciola_hepatica_OX=6192_GN=D915_004921_PE=3_SV=1	A0A2H1CC82	100	5.1e-78	299.3	100	100
maker-scaffold10x_1584_pilon-snap-gene-0.9-mRNA-1_transcript=maker-scaffold10x_1584_pilon-snap-gene-0.9-mRNA-1_gene=maker-scaffold10x_1584_pilon-snap-gene-0.9	A0A2H1CC83|A0A2H1CC83_FASHE_UPF0769_protein_C21orf59_OS=Fasciola_hepatica_OX=6192_GN=D915_005033_PE=4_SV=1	A0A2H1CC83	100	7.8e-150	538.9	100	100
maker-scaffold10x_1072_pilon-augustus-gene-0.11-mRNA-1_transcript=maker-scaffold10x_1072_pilon-augustus-gene-0.11-mRNA-1_gene=maker-scaffold10x_1072_pilon-augustus-gene-0.11	A0A2H1CCA4|A0A2H1CCA4_FASHE_Homeobox_domain_protein_OS=Fasciola_hepatica_OX=6192_GN=D915_07707_PE=4_SV=1	A0A2H1CCA4	100	5.5e-40	173.3	47	100
maker-scaffold10x_11_pilon-pred_gff_StringTie-gene-0.1-mRNA-1_transcript=maker-scaffold10x_11_pilon-pred_gff_StringTie-gene-0.1-mRNA-1_gene=maker-scaffold10x_11_pilon-pred_gff_StringTie-gene-0.1	A0A2H1CCD3|A0A2H1CCD3_FASHE_Protein-S-isoprenylcysteine_O-methyltransferase_OS=Fasciola_hepatica_OX=6192_GN=D915_08426_PE=3_SV=1	A0A2H1CCD3	99.7	2.2e-182	647.1	100	100
maker-scaffold10x_2525_pilon-snap-gene-0.5-mRNA-1_transcript=maker-scaffold10x_2525_pilon-snap-gene-0.5-mRNA-1_gene=maker-scaffold10x_2525_pilon-snap-gene-0.5	A0A2H1CCD4|A0A2H1CCD4_FASHE_Integrase_H2C2_domain-containing_protein_OS=Fasciola_hepatica_OX=6192_GN=D915_07693_PE=4_SV=1	A0A2H1CCD4	34.1	1.2e-10	76.6	43.1	43.7
maker-scaffold10x_460_pilon-snap-gene-0.16-mRNA-1_transcript=maker-scaffold10x_460_pilon-snap-gene-0.16-mRNA-1_gene=maker-scaffold10x_460_pilon-snap-gene-0.16	A0A2H1CCD4|A0A2H1CCD4_FASHE_Integrase_H2C2_domain-containing_protein_OS=Fasciola_hepatica_OX=6192_GN=D915_07693_PE=4_SV=1	A0A2H1CCD4	26.3	1.2e-05	60.1	38.9	45.1
maker-scaffold10x_894_pilon-snap-gene-0.121-mRNA-1_transcript=maker-scaffold10x_894_pilon-snap-gene-0.121-mRNA-1_gene=maker-scaffold10x_894_pilon-snap-gene-0.121	A0A2H1CCD8|A0A2H1CCD8_FASHE_SET_and_MYND_domain-containing_protein_5_OS=Fasciola_hepatica_OX=6192_GN=D915_004957_PE=4_SV=1	A0A2H1CCD8	99.8	4.1e-236	826.2	83.1	96.5
augustus_masked-scaffold10x_124_pilon-processed-gene-0.27-mRNA-1_transcript=augustus_masked-scaffold10x_124_pilon-processed-gene-0.27-mRNA-1_gene=augustus_masked-scaffold10x_124_pilon-processed-gene-0.27	A0A2H1CCE6|A0A2H1CCE6_FASHE_PurA_ssDNA_and_RNA-binding_protein_OS=Fasciola_hepatica_OX=6192_GN=D915_004961_PE=4_SV=1	A0A2H1CCE6	98.2	1.7e-149	537.7	100	95
maker-scaffold10x_1916_pilon-snap-gene-0.2-mRNA-1_transcript=maker-scaffold10x_1916_pilon-snap-gene-0.2-mRNA-1_gene=maker-scaffold10x_1916_pilon-snap-gene-0.2	A0A2H1CCE6|A0A2H1CCE6_FASHE_PurA_ssDNA_and_RNA-binding_protein_OS=Fasciola_hepatica_OX=6192_GN=D915_004961_PE=4_SV=1	A0A2H1CCE6	99.3	2.6e-161	577	100	100
maker-scaffold10x_362_pilon-pred_gff_StringTie-gene-0.11-mRNA-1_transcript=maker-scaffold10x_362_pilon-pred_gff_StringTie-gene-0.11-mRNA-1_gene=maker-scaffold10x_362_pilon-pred_gff_StringTie-gene-0.11	A0A2H1CCF3|A0A2H1CCF3_FASHE_Putative_drug_transporter_OS=Fasciola_hepatica_OX=6192_GN=D915_005099_PE=4_SV=1	A0A2H1CCF3	100	1.8e-296	1026.9	95.7	100
maker-scaffold10x_647_pilon-snap-gene-0.22-mRNA-1_transcript=maker-scaffold10x_647_pilon-snap-gene-0.22-mRNA-1_gene=maker-scaffold10x_647_pilon-snap-gene-0.22	A0A2H1CCG9|A0A2H1CCG9_FASHE_60s_Acidic_ribosomal_protein_(Fragment)_OS=Fasciola_hepatica_OX=6192_GN=D915_07643_PE=3_SV=1	A0A2H1CCG9	100	8.7e-42	178.7	91.1	75.2
maker-scaffold10x_815_pilon-pred_gff_StringTie-gene-1.228-mRNA-1_transcript=maker-scaffold10x_815_pilon-pred_gff_StringTie-gene-1.228-mRNA-1_gene=maker-scaffold10x_815_pilon-pred_gff_StringTie-gene-1.228	A0A2H1CCI2|A0A2H1CCI2_FASHE_Scavenger_mRNA_decapping_enzyme_OS=Fasciola_hepatica_OX=6192_GN=D915_005051_PE=4_SV=1	A0A2H1CCI2	100	1.5e-220	774.2	100	100
maker-scaffold10x_1017_pilon-augustus-gene-0.44-mRNA-1_transcript=maker-scaffold10x_1017_pilon-augustus-gene-0.44-mRNA-1_gene=maker-scaffold10x_1017_pilon-augustus-gene-0.44	A0A2H1CCI4|A0A2H1CCI4_FASHE_Deoxyhypusine_synthase_OS=Fasciola_hepatica_OX=6192_GN=D915_005333_PE=4_SV=1	A0A2H1CCI4	80.8	9.5e-170	605.1	100	100
augustus_masked-scaffold10x_502_pilon-processed-gene-0.29-mRNA-1_transcript=augustus_masked-scaffold10x_502_pilon-processed-gene-0.29-mRNA-1_gene=augustus_masked-scaffold10x_502_pilon-processed-gene-0.29	A0A2H1CCL6|A0A2H1CCL6_FASHE_Actin_OS=Fasciola_hepatica_OX=6192_GN=D915_004891_PE=3_SV=1	A0A2H1CCL6	95	1.2e-194	688	100	95.7
maker-scaffold10x_502_pilon-augustus-gene-0.20-mRNA-1_transcript=maker-scaffold10x_502_pilon-augustus-gene-0.20-mRNA-1_gene=maker-scaffold10x_502_pilon-augustus-gene-0.20	A0A2H1CCL6|A0A2H1CCL6_FASHE_Actin_OS=Fasciola_hepatica_OX=6192_GN=D915_004891_PE=3_SV=1	A0A2H1CCL6	100	9.6e-217	761.5	100	100
maker-scaffold10x_520_pilon-augustus-gene-1.54-mRNA-1_transcript=maker-scaffold10x_520_pilon-augustus-gene-1.54-mRNA-1_gene=maker-scaffold10x_520_pilon-augustus-gene-1.54	A0A2H1CCL6|A0A2H1CCL6_FASHE_Actin_OS=Fasciola_hepatica_OX=6192_GN=D915_004891_PE=3_SV=1	A0A2H1CCL6	100	9.6e-217	761.5	100	100
maker-scaffold10x_493_pilon-snap-gene-0.59-mRNA-1_transcript=maker-scaffold10x_493_pilon-snap-gene-0.59-mRNA-1_gene=maker-scaffold10x_493_pilon-snap-gene-0.59	A0A2H1CCM1|A0A2H1CCM1_FASHE_Ubiquitin--protein_ligase_OS=Fasciola_hepatica_OX=6192_GN=D915_08324_PE=3_SV=1	A0A2H1CCM1	100	6.5e-93	349	100	100
maker-scaffold10x_1386_pilon-snap-gene-0.4-mRNA-1_transcript=maker-scaffold10x_1386_pilon-snap-gene-0.4-mRNA-1_gene=maker-scaffold10x_1386_pilon-snap-gene-0.4	A0A2H1CCM3|A0A2H1CCM3_FASHE_Lysosomal_alpha-glucosidase_OS=Fasciola_hepatica_OX=6192_GN=D915_004716_PE=4_SV=1	A0A2H1CCM3	98.1	4.4e-120	440.7	48.8	93.5
maker-scaffold10x_125_pilon-snap-gene-0.29-mRNA-1_transcript=maker-scaffold10x_125_pilon-snap-gene-0.29-mRNA-1_gene=maker-scaffold10x_125_pilon-snap-gene-0.29	A0A2H1CCN0|A0A2H1CCN0_FASHE_UBA/TS-N_domain_protein_(Fragment)_OS=Fasciola_hepatica_OX=6192_GN=D915_08310_PE=4_SV=1	A0A2H1CCN0	99.7	4.5e-208	732.6	100	97.6
maker-scaffold10x_1916_pilon-snap-gene-0.4-mRNA-1_transcript=maker-scaffold10x_1916_pilon-snap-gene-0.4-mRNA-1_gene=maker-scaffold10x_1916_pilon-snap-gene-0.4	A0A2H1CCN1|A0A2H1CCN1_FASHE_Guanine_nucleotide_binding_protein_subunit_OS=Fasciola_hepatica_OX=6192_GN=D915_004962_PE=4_SV=1	A0A2H1CCN1	100	1.6e-178	634.4	100	100
maker-scaffold10x_520_pilon-augustus-gene-2.93-mRNA-1_transcript=maker-scaffold10x_520_pilon-augustus-gene-2.93-mRNA-1_gene=maker-scaffold10x_520_pilon-augustus-gene-2.93	A0A2H1CCN4|A0A2H1CCN4_FASHE_SH3_10_domain-containing_protein_(Fragment)_OS=Fasciola_hepatica_OX=6192_GN=D915_07598_PE=4_SV=1	A0A2H1CCN4	100	1.2e-61	244.6	100	9.8
maker-scaffold10x_520_pilon-snap-gene-1.28-mRNA-1_transcript=maker-scaffold10x_520_pilon-snap-gene-1.28-mRNA-1_gene=maker-scaffold10x_520_pilon-snap-gene-1.28	A0A2H1CCN4|A0A2H1CCN4_FASHE_SH3_10_domain-containing_protein_(Fragment)_OS=Fasciola_hepatica_OX=6192_GN=D915_07598_PE=4_SV=1	A0A2H1CCN4	100	0	2063.9	52.7	100
maker-scaffold10x_1026_pilon-pred_gff_StringTie-gene-0.1-mRNA-1_transcript=maker-scaffold10x_1026_pilon-pred_gff_StringTie-gene-0.1-mRNA-1_gene=maker-scaffold10x_1026_pilon-pred_gff_StringTie-gene-0.1	A0A2H1CCN7|A0A2H1CCN7_FASHE_ATP_synthase_subunit_C_OS=Fasciola_hepatica_OX=6192_GN=D915_004973_PE=3_SV=1	A0A2H1CCN7	100	1.3e-56	228	100	100
maker-scaffold10x_979_pilon-snap-gene-0.4-mRNA-1_transcript=maker-scaffold10x_979_pilon-snap-gene-0.4-mRNA-1_gene=maker-scaffold10x_979_pilon-snap-gene-0.4	A0A2H1CCP3|A0A2H1CCP3_FASHE_Piwi_domain_protein_(Fragment)_OS=Fasciola_hepatica_OX=6192_GN=D915_07567_PE=4_SV=1	A0A2H1CCP3	88	0	1640.6	99.6	100
maker-scaffold10x_2095_pilon-snap-gene-0.7-mRNA-1_transcript=maker-scaffold10x_2095_pilon-snap-gene-0.7-mRNA-1_gene=maker-scaffold10x_2095_pilon-snap-gene-0.7	A0A2H1CCR8|A0A2H1CCR8_FASHE_Ubiquitin--protein_ligase_OS=Fasciola_hepatica_OX=6192_GN=D915_004876_PE=4_SV=1	A0A2H1CCR8	95.6	1.5e-152	547.7	100	100
maker-scaffold10x_38_pilon-snap-gene-0.24-mRNA-1_transcript=maker-scaffold10x_38_pilon-snap-gene-0.24-mRNA-1_gene=maker-scaffold10x_38_pilon-snap-gene-0.24	A0A2H1CCT6|A0A2H1CCT6_FASHE_Transcription_initiation_factor_IIE_subunit_beta_OS=Fasciola_hepatica_OX=6192_GN=D915_08350_PE=3_SV=1	A0A2H1CCT6	100	3.2e-90	340.1	97.7	66.3
maker-scaffold10x_45_pilon-snap-gene-0.43-mRNA-1_transcript=maker-scaffold10x_45_pilon-snap-gene-0.43-mRNA-1_gene=maker-scaffold10x_45_pilon-snap-gene-0.43	A0A2H1CCV3|A0A2H1CCV3_FASHE_Fork_head_domain_protein_OS=Fasciola_hepatica_OX=6192_GN=D915_004815_PE=4_SV=1	A0A2H1CCV3	99.1	8.9e-251	874.8	100	100
snap_masked-scaffold10x_653_pilon-processed-gene-0.12-mRNA-1_transcript=snap_masked-scaffold10x_653_pilon-processed-gene-0.12-mRNA-1_gene=snap_masked-scaffold10x_653_pilon-processed-gene-0.12	A0A2H1CCW5|A0A2H1CCW5_FASHE_EF_hand_OS=Fasciola_hepatica_OX=6192_GN=D915_07498_PE=4_SV=1	A0A2H1CCW5	100	3e-32	147.5	39.4	51.1
maker-scaffold10x_1464_pilon-snap-gene-0.31-mRNA-1_transcript=maker-scaffold10x_1464_pilon-snap-gene-0.31-mRNA-1_gene=maker-scaffold10x_1464_pilon-snap-gene-0.31	A0A2H1CCZ3|A0A2H1CCZ3_FASHE_Diacylglycerol_acyltransferase_OS=Fasciola_hepatica_OX=6192_GN=D915_07543_PE=4_SV=1	A0A2H1CCZ3	100	9.9e-135	489.2	58.3	96.7
maker-scaffold10x_387_pilon-snap-gene-0.69-mRNA-1_transcript=maker-scaffold10x_387_pilon-snap-gene-0.69-mRNA-1_gene=maker-scaffold10x_387_pilon-snap-gene-0.69	A0A2H1CD23|A0A2H1CD23_FASHE_RhoGAP_domain_protein_OS=Fasciola_hepatica_OX=6192_GN=D915_07434_PE=4_SV=1	A0A2H1CD23	82.4	7.9e-29	135.2	95.5	29.4
maker-scaffold10x_327_pilon-snap-gene-0.27-mRNA-1_transcript=maker-scaffold10x_327_pilon-snap-gene-0.27-mRNA-1_gene=maker-scaffold10x_327_pilon-snap-gene-0.27	A0A2H1CD25|A0A2H1CD25_FASHE_PDZ/DHR/GLGF_domain_protein_OS=Fasciola_hepatica_OX=6192_GN=D915_07490_PE=4_SV=1	A0A2H1CD25	97.4	2.3e-32	146.7	100	45.2
snap_masked-scaffold10x_178_pilon-processed-gene-0.4-mRNA-1_transcript=snap_masked-scaffold10x_178_pilon-processed-gene-0.4-mRNA-1_gene=snap_masked-scaffold10x_178_pilon-processed-gene-0.4	A0A2H1CD31|A0A2H1CD31_FASHE_Alpha_subunit_of_casein_kinase_II_OS=Fasciola_hepatica_OX=6192_GN=D915_004801_PE=3_SV=1	A0A2H1CD31	99.5	3.7e-216	759.6	100	100
snap_masked-scaffold10x_58_pilon-processed-gene-0.90-mRNA-1_transcript=snap_masked-scaffold10x_58_pilon-processed-gene-0.90-mRNA-1_gene=snap_masked-scaffold10x_58_pilon-processed-gene-0.90	A0A2H1CD31|A0A2H1CD31_FASHE_Alpha_subunit_of_casein_kinase_II_OS=Fasciola_hepatica_OX=6192_GN=D915_004801_PE=3_SV=1	A0A2H1CD31	100	1.6e-16	95.5	27.3	15
maker-scaffold10x_459_pilon-snap-gene-0.82-mRNA-1_transcript=maker-scaffold10x_459_pilon-snap-gene-0.82-mRNA-1_gene=maker-scaffold10x_459_pilon-snap-gene-0.82	A0A2H1CD47|A0A2H1CD47_FASHE_Nuclear_transport_factor_2_domain_protein_OS=Fasciola_hepatica_OX=6192_GN=D915_004700_PE=4_SV=1	A0A2H1CD47	100	3.5e-171	610.1	85.6	98.4
maker-scaffold10x_459_pilon-snap-gene-0.77-mRNA-1_transcript=maker-scaffold10x_459_pilon-snap-gene-0.77-mRNA-1_gene=maker-scaffold10x_459_pilon-snap-gene-0.77	A0A2H1CD52|A0A2H1CD52_FASHE_Heterogeneous_nuclear_ribonucleoprotein_H_OS=Fasciola_hepatica_OX=6192_GN=D915_004699_PE=4_SV=1	A0A2H1CD52	100	5.8e-251	875.5	100	100
maker-scaffold10x_1137_pilon-snap-gene-0.91-mRNA-1_transcript=maker-scaffold10x_1137_pilon-snap-gene-0.91-mRNA-1_gene=maker-scaffold10x_1137_pilon-snap-gene-0.91	A0A2H1CD77|A0A2H1CD77_FASHE_7_transmembrane_receptor_OS=Fasciola_hepatica_OX=6192_GN=D915_08094_PE=3_SV=1	A0A2H1CD77	73.6	9.4e-154	552	100	77.9
maker-scaffold10x_473_pilon-augustus-gene-0.21-mRNA-1_transcript=maker-scaffold10x_473_pilon-augustus-gene-0.21-mRNA-1_gene=maker-scaffold10x_473_pilon-augustus-gene-0.21	A0A2H1CD96|A0A2H1CD96_FASHE_Putative_transmembrane_protein_56_OS=Fasciola_hepatica_OX=6192_GN=D915_004796_PE=4_SV=1	A0A2H1CD96	99.5	3.7e-116	426.8	87.6	66.3
maker-scaffold10x_670_pilon-augustus-gene-0.8-mRNA-1_transcript=maker-scaffold10x_670_pilon-augustus-gene-0.8-mRNA-1_gene=maker-scaffold10x_670_pilon-augustus-gene-0.8	A0A2H1CDC1|A0A2H1CDC1_FASHE_Tetraspanin_family_protein_OS=Fasciola_hepatica_OX=6192_GN=D915_08046_PE=3_SV=1	A0A2H1CDC1	86.1	1.6e-69	271.2	98.7	62.1
maker-scaffold10x_453_pilon-snap-gene-0.3-mRNA-1_transcript=maker-scaffold10x_453_pilon-snap-gene-0.3-mRNA-1_gene=maker-scaffold10x_453_pilon-snap-gene-0.3	A0A2H1CDF0|A0A2H1CDF0_FASHE_V-type_proton_ATPase_subunit_a_(Fragment)_OS=Fasciola_hepatica_OX=6192_GN=D915_08105_PE=3_SV=1	A0A2H1CDF0	97.5	0	1135.9	97.3	94.9
maker-scaffold10x_1500_pilon-augustus-gene-0.4-mRNA-1_transcript=maker-scaffold10x_1500_pilon-augustus-gene-0.4-mRNA-1_gene=maker-scaffold10x_1500_pilon-augustus-gene-0.4	A0A2H1CDI6|A0A2H1CDI6_FASHE_Zinc_finger,_C3HC4_type_OS=Fasciola_hepatica_OX=6192_GN=D915_16273_PE=4_SV=1	A0A2H1CDI6	67.4	3.1e-54	220.7	65.8	60.7
maker-scaffold10x_331_pilon-snap-gene-0.52-mRNA-1_transcript=maker-scaffold10x_331_pilon-snap-gene-0.52-mRNA-1_gene=maker-scaffold10x_331_pilon-snap-gene-0.52	A0A2H1CDK3|A0A2H1CDK3_FASHE_Interferon_developmental_regulator_OS=Fasciola_hepatica_OX=6192_GN=D915_004635_PE=4_SV=1	A0A2H1CDK3	99.8	4.1e-240	839.3	100	100
maker-scaffold10x_637_pilon-augustus-gene-0.25-mRNA-1_transcript=maker-scaffold10x_637_pilon-augustus-gene-0.25-mRNA-1_gene=maker-scaffold10x_637_pilon-augustus-gene-0.25	A0A2H1CDR3|A0A2H1CDR3_FASHE_c-Myc-binding_family_protein_OS=Fasciola_hepatica_OX=6192_GN=D915_005008_PE=4_SV=1	A0A2H1CDR3	100	1.4e-23	117.9	70.2	58.9
maker-scaffold10x_410_pilon-augustus-gene-0.46-mRNA-1_transcript=maker-scaffold10x_410_pilon-augustus-gene-0.46-mRNA-1_gene=maker-scaffold10x_410_pilon-augustus-gene-0.46	A0A2H1CDR5|A0A2H1CDR5_FASHE_Aspartyl/glutamyl-tRNA_amidotransferase_subunit_A_domain_protein_OS=Fasciola_hepatica_OX=6192_GN=D915_07245_PE=4_SV=1	A0A2H1CDR5	99.5	8e-107	395.6	90.4	100
maker-scaffold10x_325_pilon-augustus-gene-0.79-mRNA-1_transcript=maker-scaffold10x_325_pilon-augustus-gene-0.79-mRNA-1_gene=maker-scaffold10x_325_pilon-augustus-gene-0.79	A0A2H1CDS8|A0A2H1CDS8_FASHE_Dynamin_family_protein_OS=Fasciola_hepatica_OX=6192_GN=D915_004572_PE=3_SV=1	A0A2H1CDS8	100	0	1092.8	100	100
maker-scaffold10x_531_pilon-snap-gene-0.32-mRNA-1_transcript=maker-scaffold10x_531_pilon-snap-gene-0.32-mRNA-1_gene=maker-scaffold10x_531_pilon-snap-gene-0.32	A0A2H1CDU3|A0A2H1CDU3_FASHE_Mitochondrial_ATP_synthase_coupling_factor_6_OS=Fasciola_hepatica_OX=6192_GN=D915_004735_PE=4_SV=1	A0A2H1CDU3	100	5.9e-65	255.8	100	100
maker-scaffold10x_534_pilon-snap-gene-0.43-mRNA-1_transcript=maker-scaffold10x_534_pilon-snap-gene-0.43-mRNA-1_gene=maker-scaffold10x_534_pilon-snap-gene-0.43	A0A2H1CDX1|A0A2H1CDX1_FASHE_Uroporphyrinogen-III_synthase_OS=Fasciola_hepatica_OX=6192_GN=D915_07117_PE=4_SV=1	A0A2H1CDX1	95	3e-120	440.3	100	100
maker-scaffold10x_377_pilon-snap-gene-0.52-mRNA-1_transcript=maker-scaffold10x_377_pilon-snap-gene-0.52-mRNA-1_gene=maker-scaffold10x_377_pilon-snap-gene-0.52	A0A2H1CDY2|A0A2H1CDY2_FASHE_NAD-dependent_protein_deacetylase_sirtuin-4_OS=Fasciola_hepatica_OX=6192_GN=D915_004626_PE=4_SV=1	A0A2H1CDY2	99.3	2.1e-152	547.4	94.3	98.9
maker-scaffold10x_239_pilon-pred_gff_StringTie-gene-0.84-mRNA-1_transcript=maker-scaffold10x_239_pilon-pred_gff_StringTie-gene-0.84-mRNA-1_gene=maker-scaffold10x_239_pilon-pred_gff_StringTie-gene-0.84	A0A2H1CDZ1|A0A2H1CDZ1_FASHE_cAMP-dependent_protein_kinase_catalytic_subunit_alpha_OS=Fasciola_hepatica_OX=6192_GN=D915_004618_PE=3_SV=1	A0A2H1CDZ1	100	3.6e-202	713	100	100
maker-scaffold10x_598_pilon-snap-gene-1.102-mRNA-1_transcript=maker-scaffold10x_598_pilon-snap-gene-1.102-mRNA-1_gene=maker-scaffold10x_598_pilon-snap-gene-1.102	A0A2H1CE01|A0A2H1CE01_FASHE_Sister_chromatid_cohesion_protein_DCC1_OS=Fasciola_hepatica_OX=6192_GN=D915_004955_PE=4_SV=1	A0A2H1CE01	100	2.3e-279	969.9	100	100
maker-scaffold10x_99_pilon-snap-gene-0.70-mRNA-1_transcript=maker-scaffold10x_99_pilon-snap-gene-0.70-mRNA-1_gene=maker-scaffold10x_99_pilon-snap-gene-0.70	A0A2H1CE13|A0A2H1CE13_FASHE_Dr1-associated_corepressor_OS=Fasciola_hepatica_OX=6192_GN=D915_005269_PE=4_SV=1	A0A2H1CE13	98.2	4e-119	436.8	78.7	99.6
maker-scaffold10x_977_pilon-snap-gene-0.72-mRNA-1_transcript=maker-scaffold10x_977_pilon-snap-gene-0.72-mRNA-1_gene=maker-scaffold10x_977_pilon-snap-gene-0.72	A0A2H1CE51|A0A2H1CE51_FASHE_EF_hand_OS=Fasciola_hepatica_OX=6192_GN=D915_07021_PE=4_SV=1	A0A2H1CE51	98.7	4.2e-34	154.1	33.5	100
maker-scaffold10x_847_pilon-augustus-gene-0.39-mRNA-1_transcript=maker-scaffold10x_847_pilon-augustus-gene-0.39-mRNA-1_gene=maker-scaffold10x_847_pilon-augustus-gene-0.39	A0A2H1CE81|A0A2H1CE81_FASHE_Splicing_factor_arginine_serine_rich_arginine_serine_rich_splicing_factor_OS=Fasciola_hepatica_OX=6192_GN=D915_004968_PE=4_SV=1	A0A2H1CE81	100	3.2e-153	550.1	100	100
maker-scaffold10x_1125_pilon-augustus-gene-0.95-mRNA-1_transcript=maker-scaffold10x_1125_pilon-augustus-gene-0.95-mRNA-1_gene=maker-scaffold10x_1125_pilon-augustus-gene-0.95	A0A2H1CE91|A0A2H1CE91_FASHE_Ferritin_OS=Fasciola_hepatica_OX=6192_GN=D915_06978_PE=3_SV=1	A0A2H1CE91	99.1	3.7e-117	429.9	100	100
maker-scaffold10x_81_pilon-snap-gene-0.160-mRNA-1_transcript=maker-scaffold10x_81_pilon-snap-gene-0.160-mRNA-1_gene=maker-scaffold10x_81_pilon-snap-gene-0.160	A0A2H1CEB3|A0A2H1CEB3_FASHE_Protein,_SNF2_family_OS=Fasciola_hepatica_OX=6192_GN=D915_07761_PE=4_SV=1	A0A2H1CEB3	94	2.9e-89	337	91.5	100
maker-scaffold10x_1017_pilon-pred_gff_StringTie-gene-0.81-mRNA-1_transcript=maker-scaffold10x_1017_pilon-pred_gff_StringTie-gene-0.81-mRNA-1_gene=maker-scaffold10x_1017_pilon-pred_gff_StringTie-gene-0.81	A0A2H1CED0|A0A2H1CED0_FASHE_Eukaryotic_translation_initiation_factor_5A_OS=Fasciola_hepatica_OX=6192_GN=D915_06927_PE=3_SV=1	A0A2H1CED0	100	3.8e-76	293.1	100	100
maker-scaffold10x_2319_pilon-snap-gene-0.22-mRNA-1_transcript=maker-scaffold10x_2319_pilon-snap-gene-0.22-mRNA-1_gene=maker-scaffold10x_2319_pilon-snap-gene-0.22	A0A2H1CEF2|A0A2H1CEF2_FASHE_Reactive_oxygen_species_modulator_1_family_protein_OS=Fasciola_hepatica_OX=6192_GN=D915_06999_PE=4_SV=1	A0A2H1CEF2	100	2.9e-38	166.4	100	100
maker-scaffold10x_1705_pilon-snap-gene-0.7-mRNA-1_transcript=maker-scaffold10x_1705_pilon-snap-gene-0.7-mRNA-1_gene=maker-scaffold10x_1705_pilon-snap-gene-0.7	A0A2H1CEK7|A0A2H1CEK7_FASHE_Putative_mrna_binding_protein_OS=Fasciola_hepatica_OX=6192_GN=D915_004210_PE=4_SV=1	A0A2H1CEK7	100	2.7e-154	553.9	100	100
maker-scaffold10x_111_pilon-snap-gene-0.85-mRNA-1_transcript=maker-scaffold10x_111_pilon-snap-gene-0.85-mRNA-1_gene=maker-scaffold10x_111_pilon-snap-gene-0.85	A0A2H1CEL7|A0A2H1CEL7_FASHE_7_transmembrane_receptor_OS=Fasciola_hepatica_OX=6192_GN=D915_004400_PE=4_SV=1	A0A2H1CEL7	100	1.9e-304	1053.5	92.5	99.6
maker-scaffold10x_628_pilon-snap-gene-0.33-mRNA-1_transcript=maker-scaffold10x_628_pilon-snap-gene-0.33-mRNA-1_gene=maker-scaffold10x_628_pilon-snap-gene-0.33	A0A2H1CEQ1|A0A2H1CEQ1_FASHE_NUDE_C_domain-containing_protein_OS=Fasciola_hepatica_OX=6192_GN=D915_06823_PE=4_SV=1	A0A2H1CEQ1	100	5.7e-74	286.2	94	82.3
maker-scaffold10x_53_pilon-augustus-gene-0.16-mRNA-1_transcript=maker-scaffold10x_53_pilon-augustus-gene-0.16-mRNA-1_gene=maker-scaffold10x_53_pilon-augustus-gene-0.16	A0A2H1CER7|A0A2H1CER7_FASHE_CAP_N_domain-containing_protein_OS=Fasciola_hepatica_OX=6192_GN=D915_06771_PE=4_SV=1	A0A2H1CER7	62.6	3.9e-59	236.9	73.9	55.7
maker-scaffold10x_293_pilon-pred_gff_StringTie-gene-0.54-mRNA-1_transcript=maker-scaffold10x_293_pilon-pred_gff_StringTie-gene-0.54-mRNA-1_gene=maker-scaffold10x_293_pilon-pred_gff_StringTie-gene-0.54	A0A2H1CES5|A0A2H1CES5_FASHE_Frataxin_OS=Fasciola_hepatica_OX=6192_GN=D915_004277_PE=4_SV=1	A0A2H1CES5	100	2e-83	317.4	100	100
maker-scaffold10x_476_pilon-augustus-gene-0.54-mRNA-1_transcript=maker-scaffold10x_476_pilon-augustus-gene-0.54-mRNA-1_gene=maker-scaffold10x_476_pilon-augustus-gene-0.54	A0A2H1CEU3|A0A2H1CEU3_FASHE_Phosphoenolpyruvate_carboxykinase_OS=Fasciola_hepatica_OX=6192_GN=D915_004205_PE=3_SV=1	A0A2H1CEU3	100	0	1350.9	100	100
maker-scaffold10x_1410_pilon-snap-gene-0.27-mRNA-1_transcript=maker-scaffold10x_1410_pilon-snap-gene-0.27-mRNA-1_gene=maker-scaffold10x_1410_pilon-snap-gene-0.27	A0A2H1CEW2|A0A2H1CEW2_FASHE_Zinc_finger,_C2H2_type_OS=Fasciola_hepatica_OX=6192_GN=D915_06717_PE=4_SV=1	A0A2H1CEW2	98.8	5e-153	550.8	57.4	100
maker-scaffold10x_145_pilon-augustus-gene-1.29-mRNA-1_transcript=maker-scaffold10x_145_pilon-augustus-gene-1.29-mRNA-1_gene=maker-scaffold10x_145_pilon-augustus-gene-1.29	A0A2H1CEX0|A0A2H1CEX0_FASHE_Guanylate_cyclase_domain-containing_protein_OS=Fasciola_hepatica_OX=6192_GN=D915_06705_PE=4_SV=1	A0A2H1CEX0	84.7	2.9e-296	1027.3	47.3	38.8
maker-scaffold10x_145_pilon-snap-gene-2.183-mRNA-1_transcript=maker-scaffold10x_145_pilon-snap-gene-2.183-mRNA-1_gene=maker-scaffold10x_145_pilon-snap-gene-2.183	A0A2H1CEX0|A0A2H1CEX0_FASHE_Guanylate_cyclase_domain-containing_protein_OS=Fasciola_hepatica_OX=6192_GN=D915_06705_PE=4_SV=1	A0A2H1CEX0	78.6	1e-232	815.1	100	31.1
maker-scaffold10x_312_pilon-augustus-gene-0.100-mRNA-1_transcript=maker-scaffold10x_312_pilon-augustus-gene-0.100-mRNA-1_gene=maker-scaffold10x_312_pilon-augustus-gene-0.100	A0A2H1CEZ1|A0A2H1CEZ1_FASHE_Cellulase_OS=Fasciola_hepatica_OX=6192_GN=D915_004368_PE=3_SV=1	A0A2H1CEZ1	99	8.3e-301	1041.2	100	100
maker-scaffold10x_90_pilon-augustus-gene-0.127-mRNA-1_transcript=maker-scaffold10x_90_pilon-augustus-gene-0.127-mRNA-1_gene=maker-scaffold10x_90_pilon-augustus-gene-0.127	A0A2H1CEZ4|A0A2H1CEZ4_FASHE_Putative_tRNA_(cytidine(32)/guanosine(34)-2'-O)-methyltransferase_OS=Fasciola_hepatica_OX=6192_GN=D915_004314_PE=3_SV=1	A0A2H1CEZ4	100	2.8e-188	666.8	100	100
maker-scaffold10x_120_pilon-snap-gene-0.22-mRNA-1_transcript=maker-scaffold10x_120_pilon-snap-gene-0.22-mRNA-1_gene=maker-scaffold10x_120_pilon-snap-gene-0.22	A0A2H1CF15|A0A2H1CF15_FASHE_Malate_dehydrogenase_OS=Fasciola_hepatica_OX=6192_GN=D915_004345_PE=3_SV=1	A0A2H1CF15	100	3.5e-182	646.7	83.6	98.2
maker-scaffold10x_408_pilon-snap-gene-0.53-mRNA-1_transcript=maker-scaffold10x_408_pilon-snap-gene-0.53-mRNA-1_gene=maker-scaffold10x_408_pilon-snap-gene-0.53	A0A2H1CF16|A0A2H1CF16_FASHE_Acetyl-CoA_C-acetyltransferase_(Fragment)_OS=Fasciola_hepatica_OX=6192_GN=D915_06758_PE=4_SV=1	A0A2H1CF16	99.1	0	1287.7	54.8	100
maker-scaffold10x_493_pilon-pred_gff_StringTie-gene-1.73-mRNA-1_transcript=maker-scaffold10x_493_pilon-pred_gff_StringTie-gene-1.73-mRNA-1_gene=maker-scaffold10x_493_pilon-pred_gff_StringTie-gene-1.73	A0A2H1CF24|A0A2H1CF24_FASHE_Fe2OG_dioxygenase_domain-containing_protein_OS=Fasciola_hepatica_OX=6192_GN=D915_07504_PE=4_SV=1	A0A2H1CF24	100	7.2e-245	855.1	100	100
maker-scaffold10x_1193_pilon-pred_gff_StringTie-gene-0.9-mRNA-1_transcript=maker-scaffold10x_1193_pilon-pred_gff_StringTie-gene-0.9-mRNA-1_gene=maker-scaffold10x_1193_pilon-pred_gff_StringTie-gene-0.9	A0A2H1CF31|A0A2H1CF31_FASHE_Myophilin_OS=Fasciola_hepatica_OX=6192_GN=D915_004340_PE=4_SV=1	A0A2H1CF31	100	2.1e-123	450.7	100	100
maker-scaffold10x_267_pilon-augustus-gene-0.1-mRNA-1_transcript=maker-scaffold10x_267_pilon-augustus-gene-0.1-mRNA-1_gene=maker-scaffold10x_267_pilon-augustus-gene-0.1	A0A2H1CF84|A0A2H1CF84_FASHE_FHA_domain-containing_protein_(Fragment)_OS=Fasciola_hepatica_OX=6192_GN=D915_07432_PE=4_SV=1	A0A2H1CF84	100	4.7e-36	159.1	96.3	48.4
maker-scaffold10x_284_pilon-augustus-gene-0.136-mRNA-1_transcript=maker-scaffold10x_284_pilon-augustus-gene-0.136-mRNA-1_gene=maker-scaffold10x_284_pilon-augustus-gene-0.136	A0A2H1CF89|A0A2H1CF89_FASHE_Oxidoreductase,_short_chain_dehydrogenase/reductase_family_protein_OS=Fasciola_hepatica_OX=6192_GN=D915_004361_PE=4_SV=1	A0A2H1CF89	100	3.5e-183	649.8	100	100
maker-scaffold10x_284_pilon-snap-gene-0.100-mRNA-1_transcript=maker-scaffold10x_284_pilon-snap-gene-0.100-mRNA-1_gene=maker-scaffold10x_284_pilon-snap-gene-0.100	A0A2H1CF89|A0A2H1CF89_FASHE_Oxidoreductase,_short_chain_dehydrogenase/reductase_family_protein_OS=Fasciola_hepatica_OX=6192_GN=D915_004361_PE=4_SV=1	A0A2H1CF89	81.3	1.2e-148	535.4	80.3	100
maker-scaffold10x_145_pilon-snap-gene-2.200-mRNA-1_transcript=maker-scaffold10x_145_pilon-snap-gene-2.200-mRNA-1_gene=maker-scaffold10x_145_pilon-snap-gene-2.200	A0A2H1CFA0|A0A2H1CFA0_FASHE_H/ACA_ribonucleoprotein_complex_subunit_OS=Fasciola_hepatica_OX=6192_GN=D915_06600_PE=3_SV=1	A0A2H1CFA0	100	1.5e-65	257.7	98.4	91.8
maker-scaffold10x_1410_pilon-augustus-gene-0.65-mRNA-1_transcript=maker-scaffold10x_1410_pilon-augustus-gene-0.65-mRNA-1_gene=maker-scaffold10x_1410_pilon-augustus-gene-0.65	A0A2H1CFA8|A0A2H1CFA8_FASHE_U5_small_nuclear_ribonucleoprotein_40_kDa_OS=Fasciola_hepatica_OX=6192_GN=D915_004161_PE=4_SV=1	A0A2H1CFA8	100	2e-203	717.2	100	100
maker-scaffold10x_237_pilon-snap-gene-0.59-mRNA-1_transcript=maker-scaffold10x_237_pilon-snap-gene-0.59-mRNA-1_gene=maker-scaffold10x_237_pilon-snap-gene-0.59	A0A2H1CFB8|A0A2H1CFB8_FASHE_Sedlin,_region_OS=Fasciola_hepatica_OX=6192_GN=D915_004295_PE=4_SV=1	A0A2H1CFB8	100	1.4e-75	291.2	100	100
snap_masked-scaffold10x_2101_pilon-processed-gene-0.27-mRNA-1_transcript=snap_masked-scaffold10x_2101_pilon-processed-gene-0.27-mRNA-1_gene=snap_masked-scaffold10x_2101_pilon-processed-gene-0.27	A0A2H1CFC1|A0A2H1CFC1_FASHE_Mechanosensory_protein_2_OS=Fasciola_hepatica_OX=6192_GN=D915_004666_PE=4_SV=1	A0A2H1CFC1	100	1.5e-215	757.7	100	100
maker-scaffold10x_1327_pilon-snap-gene-0.17-mRNA-1_transcript=maker-scaffold10x_1327_pilon-snap-gene-0.17-mRNA-1_gene=maker-scaffold10x_1327_pilon-snap-gene-0.17	A0A2H1CFE6|A0A2H1CFE6_FASHE_Oxidoreductase,_short_chain_dehydrogenase/reductase_family_protein_(Fragment)_OS=Fasciola_hepatica_OX=6192_GN=D915_06632_PE=4_SV=1	A0A2H1CFE6	59.1	8.3e-80	305.8	100	81.4
augustus_masked-scaffold10x_1236_pilon-processed-gene-0.0-mRNA-1_transcript=augustus_masked-scaffold10x_1236_pilon-processed-gene-0.0-mRNA-1_gene=augustus_masked-scaffold10x_1236_pilon-processed-gene-0.0	A0A2H1CFJ4|A0A2H1CFJ4_FASHE_DEAD-box_ATP-dependent_RNA_helicase_30_OS=Fasciola_hepatica_OX=6192_GN=D915_003901_PE=3_SV=1	A0A2H1CFJ4	86	0	1297	100	100
maker-scaffold10x_492_pilon-augustus-gene-0.4-mRNA-1_transcript=maker-scaffold10x_492_pilon-augustus-gene-0.4-mRNA-1_gene=maker-scaffold10x_492_pilon-augustus-gene-0.4	A0A2H1CFL3|A0A2H1CFL3_FASHE_Acetylcholine_receptor_subunit_alpha-type_acr-16_OS=Fasciola_hepatica_OX=6192_GN=D915_004181_PE=3_SV=1	A0A2H1CFL3	99.1	8e-258	898.3	100	100
maker-scaffold10x_1236_pilon-snap-gene-0.12-mRNA-1_transcript=maker-scaffold10x_1236_pilon-snap-gene-0.12-mRNA-1_gene=maker-scaffold10x_1236_pilon-snap-gene-0.12	A0A2H1CFL4|A0A2H1CFL4_FASHE_Oxidoreductase,_short_chain_dehydrogenase/reductase_family_protein_OS=Fasciola_hepatica_OX=6192_GN=D915_06486_PE=4_SV=1	A0A2H1CFL4	98.8	1.8e-198	700.7	100	100
maker-scaffold10x_2630_pilon-snap-gene-0.6-mRNA-1_transcript=maker-scaffold10x_2630_pilon-snap-gene-0.6-mRNA-1_gene=maker-scaffold10x_2630_pilon-snap-gene-0.6	A0A2H1CFL7|A0A2H1CFL7_FASHE_CUB_domain-containing_protein_OS=Fasciola_hepatica_OX=6192_GN=D915_003905_PE=4_SV=1	A0A2H1CFL7	98.6	6e-112	412.5	100	76.6
maker-scaffold10x_1660_pilon-pred_gff_StringTie-gene-0.49-mRNA-1_transcript=maker-scaffold10x_1660_pilon-pred_gff_StringTie-gene-0.49-mRNA-1_gene=maker-scaffold10x_1660_pilon-pred_gff_StringTie-gene-0.49	A0A2H1CFM4|A0A2H1CFM4_FASHE_7_transmembrane_receptor_OS=Fasciola_hepatica_OX=6192_GN=D915_004297_PE=4_SV=1	A0A2H1CFM4	99.4	1.8e-276	960.3	100	100
maker-scaffold10x_476_pilon-snap-gene-0.102-mRNA-1_transcript=maker-scaffold10x_476_pilon-snap-gene-0.102-mRNA-1_gene=maker-scaffold10x_476_pilon-snap-gene-0.102	A0A2H1CFM8|A0A2H1CFM8_FASHE_Isocitrate_dehydrogenase_[NAD]_subunit,_mitochondrial_OS=Fasciola_hepatica_OX=6192_GN=D915_06457_PE=3_SV=1	A0A2H1CFM8	100	1.3e-207	731.1	100	100
maker-scaffold10x_19_pilon-augustus-gene-0.66-mRNA-1_transcript=maker-scaffold10x_19_pilon-augustus-gene-0.66-mRNA-1_gene=maker-scaffold10x_19_pilon-augustus-gene-0.66	A0A2H1CFQ8|A0A2H1CFQ8_FASHE_DnaJ_domain_protein_OS=Fasciola_hepatica_OX=6192_GN=D915_004023_PE=4_SV=1	A0A2H1CFQ8	99	0	1350.5	100	100
maker-scaffold10x_2113_pilon-snap-gene-0.16-mRNA-1_transcript=maker-scaffold10x_2113_pilon-snap-gene-0.16-mRNA-1_gene=maker-scaffold10x_2113_pilon-snap-gene-0.16	A0A2H1CFS5|A0A2H1CFS5_FASHE_Serine_proteinase_inhibitor_OS=Fasciola_hepatica_OX=6192_GN=D915_06414_PE=3_SV=1	A0A2H1CFS5	76.9	2.8e-169	603.6	100	100
maker-scaffold10x_19_pilon-snap-gene-0.106-mRNA-1_transcript=maker-scaffold10x_19_pilon-snap-gene-0.106-mRNA-1_gene=maker-scaffold10x_19_pilon-snap-gene-0.106	A0A2H1CFT2|A0A2H1CFT2_FASHE_Transporter,_major_facilitator_family_protein_OS=Fasciola_hepatica_OX=6192_GN=D915_06430_PE=4_SV=1	A0A2H1CFT2	100	0	1075.5	98.2	100
maker-scaffold10x_476_pilon-snap-gene-0.103-mRNA-1_transcript=maker-scaffold10x_476_pilon-snap-gene-0.103-mRNA-1_gene=maker-scaffold10x_476_pilon-snap-gene-0.103	A0A2H1CFV5|A0A2H1CFV5_FASHE_7_transmembrane_receptor_OS=Fasciola_hepatica_OX=6192_GN=D915_003869_PE=4_SV=1	A0A2H1CFV5	99.8	1.1e-232	814.7	100	100
maker-scaffold10x_145_pilon-snap-gene-0.10-mRNA-1_transcript=maker-scaffold10x_145_pilon-snap-gene-0.10-mRNA-1_gene=maker-scaffold10x_145_pilon-snap-gene-0.10	A0A2H1CFV8|A0A2H1CFV8_FASHE_Ferritin_OS=Fasciola_hepatica_OX=6192_GN=D915_004003_PE=3_SV=1	A0A2H1CFV8	77	7.2e-66	258.8	100	100
maker-scaffold10x_239_pilon-snap-gene-0.5-mRNA-1_transcript=maker-scaffold10x_239_pilon-snap-gene-0.5-mRNA-1_gene=maker-scaffold10x_239_pilon-snap-gene-0.5	A0A2H1CFW2|A0A2H1CFW2_FASHE_Noggin_OS=Fasciola_hepatica_OX=6192_GN=D915_07081_PE=4_SV=1	A0A2H1CFW2	99.7	5.6e-212	745.7	93.6	93.8
maker-scaffold10x_1573_pilon-snap-gene-0.37-mRNA-1_transcript=maker-scaffold10x_1573_pilon-snap-gene-0.37-mRNA-1_gene=maker-scaffold10x_1573_pilon-snap-gene-0.37	A0A2H1CFY1|A0A2H1CFY1_FASHE_WD_REPEATS_REGION_domain-containing_protein_OS=Fasciola_hepatica_OX=6192_GN=D915_06424_PE=3_SV=1	A0A2H1CFY1	83.9	1.7e-146	529.3	56.3	84.3
maker-scaffold10x_13_pilon-snap-gene-1.67-mRNA-1_transcript=maker-scaffold10x_13_pilon-snap-gene-1.67-mRNA-1_gene=maker-scaffold10x_13_pilon-snap-gene-1.67	A0A2H1CG01|A0A2H1CG01_FASHE_Immunoglobulin_I-set_domain_protein_OS=Fasciola_hepatica_OX=6192_GN=D915_004733_PE=4_SV=1	A0A2H1CG01	99.3	0	2907.5	99.1	99.2
maker-scaffold10x_1340_pilon-snap-gene-0.19-mRNA-1_transcript=maker-scaffold10x_1340_pilon-snap-gene-0.19-mRNA-1_gene=maker-scaffold10x_1340_pilon-snap-gene-0.19	A0A2H1CG25|A0A2H1CG25_FASHE_Mago_binding_protein_OS=Fasciola_hepatica_OX=6192_GN=D915_004174_PE=4_SV=1	A0A2H1CG25	99	2.1e-101	377.5	100	100
snap_masked-scaffold10x_1366_pilon-processed-gene-0.45-mRNA-1_transcript=snap_masked-scaffold10x_1366_pilon-processed-gene-0.45-mRNA-1_gene=snap_masked-scaffold10x_1366_pilon-processed-gene-0.45	A0A2H1CG45|A0A2H1CG45_FASHE_7_transmembrane_receptor_OS=Fasciola_hepatica_OX=6192_GN=D915_004069_PE=4_SV=1	A0A2H1CG45	99.6	9.6e-132	478.8	84.3	49.5
maker-scaffold10x_532_pilon-snap-gene-0.4-mRNA-1_transcript=maker-scaffold10x_532_pilon-snap-gene-0.4-mRNA-1_gene=maker-scaffold10x_532_pilon-snap-gene-0.4	A0A2H1CG63|A0A2H1CG63_FASHE_Miro-like_protein_OS=Fasciola_hepatica_OX=6192_GN=D915_07070_PE=4_SV=1	A0A2H1CG63	98.4	1.1e-132	481.9	88.7	86.2
maker-scaffold10x_691_pilon-snap-gene-0.39-mRNA-1_transcript=maker-scaffold10x_691_pilon-snap-gene-0.39-mRNA-1_gene=maker-scaffold10x_691_pilon-snap-gene-0.39	A0A2H1CG65|A0A2H1CG65_FASHE_Actin_OS=Fasciola_hepatica_OX=6192_GN=D915_003704_PE=3_SV=1	A0A2H1CG65	100	7.3e-217	761.9	100	100
maker-scaffold10x_500_pilon-snap-gene-0.44-mRNA-1_transcript=maker-scaffold10x_500_pilon-snap-gene-0.44-mRNA-1_gene=maker-scaffold10x_500_pilon-snap-gene-0.44	A0A2H1CG98|A0A2H1CG98_FASHE_C-SKI_Smad4_binding_domain_protein_OS=Fasciola_hepatica_OX=6192_GN=D915_004545_PE=4_SV=1	A0A2H1CG98	99.7	0	1148.3	100	96.1
maker-scaffold10x_1_pilon-snap-gene-0.157-mRNA-1_transcript=maker-scaffold10x_1_pilon-snap-gene-0.157-mRNA-1_gene=maker-scaffold10x_1_pilon-snap-gene-0.157	A0A2H1CGC5|A0A2H1CGC5_FASHE_ABC_transporter,_ATP-binding_protein_OS=Fasciola_hepatica_OX=6192_GN=D915_07034_PE=4_SV=1	A0A2H1CGC5	99.7	0	4025.3	92.8	99.9
maker-scaffold10x_1853_pilon-snap-gene-0.14-mRNA-1_transcript=maker-scaffold10x_1853_pilon-snap-gene-0.14-mRNA-1_gene=maker-scaffold10x_1853_pilon-snap-gene-0.14	A0A2H1CGC8|A0A2H1CGC8_FASHE_Mov34/MPN/PAD-1_family_protein_OS=Fasciola_hepatica_OX=6192_GN=D915_06174_PE=4_SV=1	A0A2H1CGC8	100	2e-175	624	100	100
maker-scaffold10x_977_pilon-snap-gene-0.81-mRNA-1_transcript=maker-scaffold10x_977_pilon-snap-gene-0.81-mRNA-1_gene=maker-scaffold10x_977_pilon-snap-gene-0.81	A0A2H1CGD7|A0A2H1CGD7_FASHE_Mitochondrial_28S_ribosomal_protein_S6_OS=Fasciola_hepatica_OX=6192_GN=D915_004707_PE=4_SV=1	A0A2H1CGD7	77.8	3.9e-51	209.5	100	100
snap_masked-scaffold10x_43_pilon-processed-gene-0.28-mRNA-1_transcript=snap_masked-scaffold10x_43_pilon-processed-gene-0.28-mRNA-1_gene=snap_masked-scaffold10x_43_pilon-processed-gene-0.28	A0A2H1CGF2|A0A2H1CGF2_FASHE_Transporter,_major_intrinsic_protein_family_protein_OS=Fasciola_hepatica_OX=6192_GN=D915_004012_PE=3_SV=1	A0A2H1CGF2	86.7	3e-96	360.5	90.7	82.6
maker-scaffold10x_493_pilon-snap-gene-1.32-mRNA-1_transcript=maker-scaffold10x_493_pilon-snap-gene-1.32-mRNA-1_gene=maker-scaffold10x_493_pilon-snap-gene-1.32	A0A2H1CGM4|A0A2H1CGM4_FASHE_Ribosomal_protein_S4_OS=Fasciola_hepatica_OX=6192_GN=D915_004010_PE=3_SV=1	A0A2H1CGM4	100	9.2e-99	368.6	100	100
maker-scaffold10x_23_pilon-snap-gene-0.80-mRNA-1_transcript=maker-scaffold10x_23_pilon-snap-gene-0.80-mRNA-1_gene=maker-scaffold10x_23_pilon-snap-gene-0.80	A0A2H1CGR4|A0A2H1CGR4_FASHE_DnaJ_domain_protein_OS=Fasciola_hepatica_OX=6192_GN=D915_004076_PE=3_SV=1	A0A2H1CGR4	100	1.5e-201	711.1	91.6	89.1
maker-scaffold10x_247_pilon-augustus-gene-0.49-mRNA-1_transcript=maker-scaffold10x_247_pilon-augustus-gene-0.49-mRNA-1_gene=maker-scaffold10x_247_pilon-augustus-gene-0.49	A0A2H1CGV7|A0A2H1CGV7_FASHE_Putative_prefoldin,_alpha_subunit_OS=Fasciola_hepatica_OX=6192_GN=D915_05979_PE=4_SV=1	A0A2H1CGV7	98.7	3e-35	157.1	57	50.3
snap_masked-scaffold10x_251_pilon-processed-gene-0.40-mRNA-1_transcript=snap_masked-scaffold10x_251_pilon-processed-gene-0.40-mRNA-1_gene=snap_masked-scaffold10x_251_pilon-processed-gene-0.40	A0A2H1CGX7|A0A2H1CGX7_FASHE_Hexosyltransferase_OS=Fasciola_hepatica_OX=6192_GN=D915_004002_PE=3_SV=1	A0A2H1CGX7	99.7	5.8e-175	622.5	97.5	74
maker-scaffold10x_677_pilon-snap-gene-0.17-mRNA-1_transcript=maker-scaffold10x_677_pilon-snap-gene-0.17-mRNA-1_gene=maker-scaffold10x_677_pilon-snap-gene-0.17	A0A2H1CGZ7|A0A2H1CGZ7_FASHE_RIIa_domain-containing_protein_OS=Fasciola_hepatica_OX=6192_GN=D915_16254_PE=4_SV=1	A0A2H1CGZ7	93.2	1.9e-192	681	99.3	88.8
maker-scaffold10x_503_pilon-snap-gene-0.85-mRNA-1_transcript=maker-scaffold10x_503_pilon-snap-gene-0.85-mRNA-1_gene=maker-scaffold10x_503_pilon-snap-gene-0.85	A0A2H1CCH3|A0A2H1CCH3_FASHE_PH_domain_protein_(Fragment)_OS=Fasciola_hepatica_OX=6192_GN=D915_08472_PE=4_SV=1	A0A2H1CCH3	78.3	2.8e-50	207.2	94.1	46.1
maker-scaffold10x_200_pilon-snap-gene-0.137-mRNA-1_transcript=maker-scaffold10x_200_pilon-snap-gene-0.137-mRNA-1_gene=maker-scaffold10x_200_pilon-snap-gene-0.137	A0A2H1CCH9|A0A2H1CCH9_FASHE_RAB27B_member_RAS_oncogene_family_OS=Fasciola_hepatica_OX=6192_GN=D915_005140_PE=4_SV=1	A0A2H1CCH9	92.3	4.3e-103	383.3	86.1	91.6
maker-scaffold10x_1041_pilon-snap-gene-0.13-mRNA-1_transcript=maker-scaffold10x_1041_pilon-snap-gene-0.13-mRNA-1_gene=maker-scaffold10x_1041_pilon-snap-gene-0.13	A0A2H1CI06|A0A2H1CI06_FASHE_Tetratricopeptide_repeat_protein_OS=Fasciola_hepatica_OX=6192_GN=D915_05574_PE=4_SV=1	A0A2H1CI06	91.5	2.3e-114	420.6	98.2	100
maker-scaffold10x_630_pilon-snap-gene-0.1-mRNA-1_transcript=maker-scaffold10x_630_pilon-snap-gene-0.1-mRNA-1_gene=maker-scaffold10x_630_pilon-snap-gene-0.1	A0A2H1CI50|A0A2H1CI50_FASHE_Putative_T-complex_protein_1,_theta_subunit_OS=Fasciola_hepatica_OX=6192_GN=D915_06427_PE=3_SV=1	A0A2H1CI50	100	8.6e-91	342	100	44.8
maker-scaffold10x_784_pilon-snap-gene-0.40-mRNA-1_transcript=maker-scaffold10x_784_pilon-snap-gene-0.40-mRNA-1_gene=maker-scaffold10x_784_pilon-snap-gene-0.40	A0A2H1CI60|A0A2H1CI60_FASHE_Kelch_repeat_protein_(Fragment)_OS=Fasciola_hepatica_OX=6192_GN=D915_05541_PE=4_SV=1	A0A2H1CI60	99.6	3.5e-138	500.7	57.1	94.6
maker-scaffold10x_432_pilon-snap-gene-0.113-mRNA-1_transcript=maker-scaffold10x_432_pilon-snap-gene-0.113-mRNA-1_gene=maker-scaffold10x_432_pilon-snap-gene-0.113	A0A2H1CI87|A0A2H1CI87_FASHE_RNA_polymerase_II_transcription_elongation_factor_OS=Fasciola_hepatica_OX=6192_GN=D915_003459_PE=3_SV=1	A0A2H1CI87	95.1	5.7e-23	115.9	60.4	50.8
maker-scaffold10x_80_pilon-augustus-gene-0.136-mRNA-1_transcript=maker-scaffold10x_80_pilon-augustus-gene-0.136-mRNA-1_gene=maker-scaffold10x_80_pilon-augustus-gene-0.136	A0A2H1CI96|A0A2H1CI96_FASHE_Alpha-tubulin_N-acetyltransferase_OS=Fasciola_hepatica_OX=6192_GN=D915_05453_PE=3_SV=1	A0A2H1CI96	70.9	1.7e-101	377.9	100	100
maker-scaffold10x_98_pilon-snap-gene-0.9-mRNA-1_transcript=maker-scaffold10x_98_pilon-snap-gene-0.9-mRNA-1_gene=maker-scaffold10x_98_pilon-snap-gene-0.9	A0A2H1CI97|A0A2H1CI97_FASHE_Guanylate_kinase-like_domain-containing_protein_OS=Fasciola_hepatica_OX=6192_GN=D915_06367_PE=4_SV=1	A0A2H1CI97	99.7	2.1e-137	497.7	100	79.4
maker-scaffold10x_1006_pilon-augustus-gene-0.7-mRNA-1_transcript=maker-scaffold10x_1006_pilon-augustus-gene-0.7-mRNA-1_gene=maker-scaffold10x_1006_pilon-augustus-gene-0.7	A0A2H1CIA3|A0A2H1CIA3_FASHE_Fcf2_pre-rRNA_processing_OS=Fasciola_hepatica_OX=6192_GN=D915_06149_PE=4_SV=1	A0A2H1CIA3	98.3	4e-120	439.9	96.2	65.8
maker-scaffold10x_1112_pilon-augustus-gene-0.5-mRNA-1_transcript=maker-scaffold10x_1112_pilon-augustus-gene-0.5-mRNA-1_gene=maker-scaffold10x_1112_pilon-augustus-gene-0.5	A0A2H1CIA4|A0A2H1CIA4_FASHE_CRAL/TRIO_domain_protein_OS=Fasciola_hepatica_OX=6192_GN=D915_003598_PE=4_SV=1	A0A2H1CIA4	96.1	1.3e-149	538.1	95.2	84.3
maker-scaffold10x_158_pilon-pred_gff_StringTie-gene-0.0-mRNA-1_transcript=maker-scaffold10x_158_pilon-pred_gff_StringTie-gene-0.0-mRNA-1_gene=maker-scaffold10x_158_pilon-pred_gff_StringTie-gene-0.0	A0A2H1CIC5|A0A2H1CIC5_FASHE_L-lactate_dehydrogenase_OS=Fasciola_hepatica_OX=6192_GN=D915_003689_PE=3_SV=1	A0A2H1CIC5	100	4.3e-181	642.9	100	100
snap_masked-scaffold10x_289_pilon-processed-gene-0.23-mRNA-1_transcript=snap_masked-scaffold10x_289_pilon-processed-gene-0.23-mRNA-1_gene=snap_masked-scaffold10x_289_pilon-processed-gene-0.23	A0A2H1CIG9|A0A2H1CIG9_FASHE_Serine/threonine-protein_kinase_receptor_OS=Fasciola_hepatica_OX=6192_GN=D915_05445_PE=3_SV=1	A0A2H1CIG9	97.7	7.7e-250	871.7	99.5	81.1
maker-scaffold10x_97_pilon-snap-gene-0.100-mRNA-1_transcript=maker-scaffold10x_97_pilon-snap-gene-0.100-mRNA-1_gene=maker-scaffold10x_97_pilon-snap-gene-0.100	A0A2H1CIH0|A0A2H1CIH0_FASHE_DNA_excision_repair_protein_ERCC-6_OS=Fasciola_hepatica_OX=6192_GN=D915_003398_PE=4_SV=1	A0A2H1CIH0	99.4	0	2450.2	100	100
maker-scaffold10x_1566_pilon-snap-gene-0.23-mRNA-1_transcript=maker-scaffold10x_1566_pilon-snap-gene-0.23-mRNA-1_gene=maker-scaffold10x_1566_pilon-snap-gene-0.23	A0A2H1CIH4|A0A2H1CIH4_FASHE_Zinc_finger_protein_OS=Fasciola_hepatica_OX=6192_GN=D915_003244_PE=4_SV=1	A0A2H1CIH4	100	2.3e-281	976.5	100	100
maker-scaffold10x_14_pilon-snap-gene-0.118-mRNA-1_transcript=maker-scaffold10x_14_pilon-snap-gene-0.118-mRNA-1_gene=maker-scaffold10x_14_pilon-snap-gene-0.118	A0A2H1CIJ3|A0A2H1CIJ3_FASHE_SCP-like_protein_OS=Fasciola_hepatica_OX=6192_GN=D915_05416_PE=3_SV=1	A0A2H1CIJ3	100	8e-63	248.4	100	71.2
maker-scaffold10x_602_pilon-pred_gff_StringTie-gene-0.15-mRNA-1_transcript=maker-scaffold10x_602_pilon-pred_gff_StringTie-gene-0.15-mRNA-1_gene=maker-scaffold10x_602_pilon-pred_gff_StringTie-gene-0.15	A0A2H1CIN3|A0A2H1CIN3_FASHE_Amiloride-sensitive_sodium_channel_OS=Fasciola_hepatica_OX=6192_GN=D915_003232_PE=3_SV=1	A0A2H1CIN3	99.8	0	1322.8	100	100
maker-scaffold10x_1437_pilon-snap-gene-0.43-mRNA-1_transcript=maker-scaffold10x_1437_pilon-snap-gene-0.43-mRNA-1_gene=maker-scaffold10x_1437_pilon-snap-gene-0.43	A0A2H1CIR3|A0A2H1CIR3_FASHE_MIT_C_domain-containing_protein_OS=Fasciola_hepatica_OX=6192_GN=D915_16242_PE=4_SV=1	A0A2H1CIR3	97.3	2.1e-118	434.1	95.6	100
maker-scaffold10x_1366_pilon-snap-gene-0.29-mRNA-1_transcript=maker-scaffold10x_1366_pilon-snap-gene-0.29-mRNA-1_gene=maker-scaffold10x_1366_pilon-snap-gene-0.29	A0A2H1CIT2|A0A2H1CIT2_FASHE_DNA_/_pantothenate_metabolism_flavoprotein_(Fragment)_OS=Fasciola_hepatica_OX=6192_GN=D915_05328_PE=4_SV=1	A0A2H1CIT2	87.6	4.4e-130	473	99.2	96.2
augustus_masked-scaffold10x_1160_pilon-processed-gene-0.17-mRNA-1_transcript=augustus_masked-scaffold10x_1160_pilon-processed-gene-0.17-mRNA-1_gene=augustus_masked-scaffold10x_1160_pilon-processed-gene-0.17	A0A2H1CIT9|A0A2H1CIT9_FASHE_Cytohesin_guanine_nucleotide-exchange_protein_OS=Fasciola_hepatica_OX=6192_GN=D915_003351_PE=4_SV=1	A0A2H1CIT9	99.6	4.6e-297	1028.9	96.1	55.7
maker-scaffold10x_1194_pilon-snap-gene-0.45-mRNA-1_transcript=maker-scaffold10x_1194_pilon-snap-gene-0.45-mRNA-1_gene=maker-scaffold10x_1194_pilon-snap-gene-0.45	A0A2H1CIU7|A0A2H1CIU7_FASHE_CI_protein_OS=Fasciola_hepatica_OX=6192_GN=D915_003540_PE=4_SV=1	A0A2H1CIU7	96.2	0	3880.1	100	100
maker-scaffold10x_589_pilon-augustus-gene-0.57-mRNA-1_transcript=maker-scaffold10x_589_pilon-augustus-gene-0.57-mRNA-1_gene=maker-scaffold10x_589_pilon-augustus-gene-0.57	A0A2H1CIV9|A0A2H1CIV9_FASHE_Glucose-6-phosphate_isomerase_OS=Fasciola_hepatica_OX=6192_GN=D915_05229_PE=3_SV=1	A0A2H1CIV9	78.8	2e-90	340.9	98.9	42.4
maker-scaffold10x_331_pilon-snap-gene-0.56-mRNA-1_transcript=maker-scaffold10x_331_pilon-snap-gene-0.56-mRNA-1_gene=maker-scaffold10x_331_pilon-snap-gene-0.56	A0A2H1CIW1|A0A2H1CIW1_FASHE_Lipocalin_/_cytosolic_fatty-acid_binding_protein_(Fragment)_OS=Fasciola_hepatica_OX=6192_GN=D915_05276_PE=3_SV=1	A0A2H1CIW1	100	1.9e-66	260.8	100	77.2
augustus_masked-scaffold10x_631_pilon-processed-gene-0.95-mRNA-1_transcript=augustus_masked-scaffold10x_631_pilon-processed-gene-0.95-mRNA-1_gene=augustus_masked-scaffold10x_631_pilon-processed-gene-0.95	A0A2H1CIW3|A0A2H1CIW3_FASHE_Pectinesterase_inhibitor_domain_protein_OS=Fasciola_hepatica_OX=6192_GN=D915_05296_PE=4_SV=1	A0A2H1CIW3	100	0	1929.8	100	100
snap_masked-scaffold10x_242_pilon-processed-gene-0.30-mRNA-1_transcript=snap_masked-scaffold10x_242_pilon-processed-gene-0.30-mRNA-1_gene=snap_masked-scaffold10x_242_pilon-processed-gene-0.30	A0A2H1CIW4|A0A2H1CIW4_FASHE_DnaJ_domain_protein_OS=Fasciola_hepatica_OX=6192_GN=D915_05896_PE=4_SV=1	A0A2H1CIW4	87	4.3e-159	569.7	99.7	50.3
maker-scaffold10x_102_pilon-snap-gene-0.43-mRNA-1_transcript=maker-scaffold10x_102_pilon-snap-gene-0.43-mRNA-1_gene=maker-scaffold10x_102_pilon-snap-gene-0.43	A0A2H1CIW5|A0A2H1CIW5_FASHE_CUB_domain_protein_OS=Fasciola_hepatica_OX=6192_GN=D915_05238_PE=4_SV=1	A0A2H1CIW5	94.4	5.2e-225	789.6	66.5	65.9
maker-scaffold10x_331_pilon-snap-gene-0.57-mRNA-1_transcript=maker-scaffold10x_331_pilon-snap-gene-0.57-mRNA-1_gene=maker-scaffold10x_331_pilon-snap-gene-0.57	A0A2H1CIW6|A0A2H1CIW6_FASHE_Fatty_acid-binding_protein_type_2_OS=Fasciola_hepatica_OX=6192_GN=D915_003367_PE=3_SV=1	A0A2H1CIW6	100	6.7e-66	259.2	80.5	100
maker-scaffold10x_2801_pilon-augustus-gene-0.1-mRNA-1_transcript=maker-scaffold10x_2801_pilon-augustus-gene-0.1-mRNA-1_gene=maker-scaffold10x_2801_pilon-augustus-gene-0.1	A0A2H1CIY4|A0A2H1CIY4_FASHE_SCP-like_protein_OS=Fasciola_hepatica_OX=6192_GN=D915_16239_PE=4_SV=1	A0A2H1CIY4	100	2.2e-48	200.3	99	53.8
maker-scaffold10x_142_pilon-snap-gene-0.76-mRNA-1_transcript=maker-scaffold10x_142_pilon-snap-gene-0.76-mRNA-1_gene=maker-scaffold10x_142_pilon-snap-gene-0.76	A0A2H1CIZ1|A0A2H1CIZ1_FASHE_Integrase_H2C2_domain-containing_protein_OS=Fasciola_hepatica_OX=6192_GN=D915_05241_PE=4_SV=1	A0A2H1CIZ1	91.1	1.5e-61	245	67	35.4
maker-scaffold10x_124_pilon-snap-gene-0.15-mRNA-1_transcript=maker-scaffold10x_124_pilon-snap-gene-0.15-mRNA-1_gene=maker-scaffold10x_124_pilon-snap-gene-0.15	A0A2H1CIZ5|A0A2H1CIZ5_FASHE_Ribosomal_protein_L24_OS=Fasciola_hepatica_OX=6192_GN=D915_003546_PE=3_SV=1	A0A2H1CIZ5	100	8.7e-70	271.9	100	100
maker-scaffold10x_493_pilon-snap-gene-1.23-mRNA-1_transcript=maker-scaffold10x_493_pilon-snap-gene-1.23-mRNA-1_gene=maker-scaffold10x_493_pilon-snap-gene-1.23	A0A2H1CJ09|A0A2H1CJ09_FASHE_PDZ_domain-containing_protein_OS=Fasciola_hepatica_OX=6192_GN=D915_05174_PE=4_SV=1	A0A2H1CJ09	93.3	1.1e-190	676	43.2	80.8
maker-scaffold10x_544_pilon-snap-gene-0.24-mRNA-1_transcript=maker-scaffold10x_544_pilon-snap-gene-0.24-mRNA-1_gene=maker-scaffold10x_544_pilon-snap-gene-0.24	A0A2H1CJ24|A0A2H1CJ24_FASHE_Tho_complex_subunit_7_OS=Fasciola_hepatica_OX=6192_GN=D915_003270_PE=4_SV=1	A0A2H1CJ24	100	6.4e-75	289.7	67.1	100
maker-scaffold10x_544_pilon-snap-gene-0.42-mRNA-1_transcript=maker-scaffold10x_544_pilon-snap-gene-0.42-mRNA-1_gene=maker-scaffold10x_544_pilon-snap-gene-0.42	A0A2H1CJ52|A0A2H1CJ52_FASHE_Transketolase_OS=Fasciola_hepatica_OX=6192_GN=D915_003268_PE=4_SV=1	A0A2H1CJ52	99.8	0	1256.9	100	100
snap_masked-scaffold10x_660_pilon-processed-gene-0.7-mRNA-1_transcript=snap_masked-scaffold10x_660_pilon-processed-gene-0.7-mRNA-1_gene=snap_masked-scaffold10x_660_pilon-processed-gene-0.7	A0A2H1CJ58|A0A2H1CJ58_FASHE_Autophagy-related_protein_9_OS=Fasciola_hepatica_OX=6192_GN=D915_05810_PE=3_SV=1	A0A2H1CJ58	91.3	0	1730.7	65.6	97.8
snap_masked-scaffold10x_598_pilon-processed-gene-1.175-mRNA-1_transcript=snap_masked-scaffold10x_598_pilon-processed-gene-1.175-mRNA-1_gene=snap_masked-scaffold10x_598_pilon-processed-gene-1.175	A0A2H1CJ60|A0A2H1CJ60_FASHE_Rap_guanine_nucleotide_exchange_factor_4_OS=Fasciola_hepatica_OX=6192_GN=D915_003204_PE=4_SV=1	A0A2H1CJ60	99.7	0	2167.9	100	95.9
maker-scaffold10x_908_pilon-snap-gene-0.99-mRNA-1_transcript=maker-scaffold10x_908_pilon-snap-gene-0.99-mRNA-1_gene=maker-scaffold10x_908_pilon-snap-gene-0.99	A0A2H1CJ88|A0A2H1CJ88_FASHE_Globin_OS=Fasciola_hepatica_OX=6192_GN=D915_003344_PE=3_SV=1	A0A2H1CJ88	99.3	6e-73	283.9	37.3	96.6
maker-scaffold10x_525_pilon-augustus-gene-0.6-mRNA-1_transcript=maker-scaffold10x_525_pilon-augustus-gene-0.6-mRNA-1_gene=maker-scaffold10x_525_pilon-augustus-gene-0.6	A0A2H1CJA5|A0A2H1CJA5_FASHE_Homeobox_domain_protein_OS=Fasciola_hepatica_OX=6192_GN=D915_05094_PE=4_SV=1	A0A2H1CJA5	100	5e-140	506.1	96.5	55.4
maker-scaffold10x_1549_pilon-pred_gff_StringTie-gene-0.14-mRNA-1_transcript=maker-scaffold10x_1549_pilon-pred_gff_StringTie-gene-0.14-mRNA-1_gene=maker-scaffold10x_1549_pilon-pred_gff_StringTie-gene-0.14	A0A2H1CJB5|A0A2H1CJB5_FASHE_Universal_stress_family_protein_OS=Fasciola_hepatica_OX=6192_GN=D915_003416_PE=4_SV=1	A0A2H1CJB5	100	9.1e-87	328.6	100	100
maker-scaffold10x_1198_pilon-snap-gene-0.53-mRNA-1_transcript=maker-scaffold10x_1198_pilon-snap-gene-0.53-mRNA-1_gene=maker-scaffold10x_1198_pilon-snap-gene-0.53	A0A2H1CJC9|A0A2H1CJC9_FASHE_Ras_family_protein_OS=Fasciola_hepatica_OX=6192_GN=D915_05074_PE=4_SV=1	A0A2H1CJC9	96.6	3.5e-78	300.1	89.2	89.2
maker-scaffold10x_1492_pilon-augustus-gene-0.15-mRNA-1_transcript=maker-scaffold10x_1492_pilon-augustus-gene-0.15-mRNA-1_gene=maker-scaffold10x_1492_pilon-augustus-gene-0.15	A0A2H1CJD9|A0A2H1CJD9_FASHE_CT20_family_protein_OS=Fasciola_hepatica_OX=6192_GN=D915_05147_PE=4_SV=1	A0A2H1CJD9	65.7	1.2e-49	204.9	100	82.8
maker-scaffold10x_71_pilon-snap-gene-0.87-mRNA-1_transcript=maker-scaffold10x_71_pilon-snap-gene-0.87-mRNA-1_gene=maker-scaffold10x_71_pilon-snap-gene-0.87	A0A2H1CJE1|A0A2H1CJE1_FASHE_14-3-3_protein_OS=Fasciola_hepatica_OX=6192_GN=D915_05063_PE=3_SV=1	A0A2H1CJE1	100	4e-134	486.5	100	100
snap_masked-scaffold10x_324_pilon-processed-gene-0.45-mRNA-1_transcript=snap_masked-scaffold10x_324_pilon-processed-gene-0.45-mRNA-1_gene=snap_masked-scaffold10x_324_pilon-processed-gene-0.45	A0A2H1CJE8|A0A2H1CJE8_FASHE_ATP_synthase_subunit_e,_mitochondrial_OS=Fasciola_hepatica_OX=6192_GN=D915_003189_PE=3_SV=1	A0A2H1CJE8	100	3.8e-35	156.8	61.9	93.3
maker-scaffold10x_1549_pilon-snap-gene-0.79-mRNA-1_transcript=maker-scaffold10x_1549_pilon-snap-gene-0.79-mRNA-1_gene=maker-scaffold10x_1549_pilon-snap-gene-0.79	A0A2H1CJG9|A0A2H1CJG9_FASHE_Centrin_OS=Fasciola_hepatica_OX=6192_GN=D915_003415_PE=4_SV=1	A0A2H1CJG9	86.5	7.1e-65	255.8	100	98.2
maker-scaffold10x_1549_pilon-snap-gene-0.91-mRNA-1_transcript=maker-scaffold10x_1549_pilon-snap-gene-0.91-mRNA-1_gene=maker-scaffold10x_1549_pilon-snap-gene-0.91	A0A2H1CJG9|A0A2H1CJG9_FASHE_Centrin_OS=Fasciola_hepatica_OX=6192_GN=D915_003415_PE=4_SV=1	A0A2H1CJG9	98.2	8.8e-82	312	100	100
maker-scaffold10x_1050_pilon-snap-gene-0.13-mRNA-1_transcript=maker-scaffold10x_1050_pilon-snap-gene-0.13-mRNA-1_gene=maker-scaffold10x_1050_pilon-snap-gene-0.13	A0A2H1CJH6|A0A2H1CJH6_FASHE_Zinc_finger,_C2H2_type_OS=Fasciola_hepatica_OX=6192_GN=D915_05028_PE=4_SV=1	A0A2H1CJH6	99.7	0	1451.8	99.9	96.8
maker-scaffold10x_142_pilon-snap-gene-0.63-mRNA-1_transcript=maker-scaffold10x_142_pilon-snap-gene-0.63-mRNA-1_gene=maker-scaffold10x_142_pilon-snap-gene-0.63	A0A2H1CJL2|A0A2H1CJL2_FASHE_6-phosphogluconolactonase_(Fragment)_OS=Fasciola_hepatica_OX=6192_GN=D915_05006_PE=3_SV=1	A0A2H1CJL2	100	1.2e-87	331.6	82.9	89.6
maker-scaffold10x_873_pilon-snap-gene-0.79-mRNA-1_transcript=maker-scaffold10x_873_pilon-snap-gene-0.79-mRNA-1_gene=maker-scaffold10x_873_pilon-snap-gene-0.79	A0A2H1CJL9|A0A2H1CJL9_FASHE_DnaJ_domain_protein_OS=Fasciola_hepatica_OX=6192_GN=D915_003192_PE=4_SV=1	A0A2H1CJL9	88.9	5.1e-49	203	77.2	73.6
augustus_masked-scaffold10x_2220_pilon-processed-gene-0.0-mRNA-1_transcript=augustus_masked-scaffold10x_2220_pilon-processed-gene-0.0-mRNA-1_gene=augustus_masked-scaffold10x_2220_pilon-processed-gene-0.0	A0A2H1CJP6|A0A2H1CJP6_FASHE_Phosphatidylinositol_transfer_protein_OS=Fasciola_hepatica_OX=6192_GN=D915_003241_PE=4_SV=1	A0A2H1CJP6	98.5	5.8e-152	545.8	100	96
maker-scaffold10x_223_pilon-snap-gene-0.2-mRNA-1_transcript=maker-scaffold10x_223_pilon-snap-gene-0.2-mRNA-1_gene=maker-scaffold10x_223_pilon-snap-gene-0.2	A0A2H1CJP6|A0A2H1CJP6_FASHE_Phosphatidylinositol_transfer_protein_OS=Fasciola_hepatica_OX=6192_GN=D915_003241_PE=4_SV=1	A0A2H1CJP6	97.1	2.8e-157	563.5	100	100
maker-scaffold10x_139_pilon-snap-gene-0.7-mRNA-1_transcript=maker-scaffold10x_139_pilon-snap-gene-0.7-mRNA-1_gene=maker-scaffold10x_139_pilon-snap-gene-0.7	A0A2H1CJQ1|A0A2H1CJQ1_FASHE_Leucine_Rich_repeat-containing_domain_protein_(Fragment)_OS=Fasciola_hepatica_OX=6192_GN=D915_05589_PE=4_SV=1	A0A2H1CJQ1	99	1e-241	845.1	99.7	96.8
maker-scaffold10x_217_pilon-snap-gene-0.55-mRNA-1_transcript=maker-scaffold10x_217_pilon-snap-gene-0.55-mRNA-1_gene=maker-scaffold10x_217_pilon-snap-gene-0.55	A0A2H1CJR5|A0A2H1CJR5_FASHE_Centrin-2_OS=Fasciola_hepatica_OX=6192_GN=D915_003274_PE=4_SV=1	A0A2H1CJR5	100	4.8e-75	291.2	28	92.1
maker-scaffold10x_13_pilon-snap-gene-1.65-mRNA-1_transcript=maker-scaffold10x_13_pilon-snap-gene-1.65-mRNA-1_gene=maker-scaffold10x_13_pilon-snap-gene-1.65	A0A2H1CJT1|A0A2H1CJT1_FASHE_Small_ubiquitin-related_modifier_OS=Fasciola_hepatica_OX=6192_GN=D915_003085_PE=3_SV=1	A0A2H1CJT1	100	2e-46	193.7	100	100
maker-scaffold10x_513_pilon-snap-gene-1.163-mRNA-1_transcript=maker-scaffold10x_513_pilon-snap-gene-1.163-mRNA-1_gene=maker-scaffold10x_513_pilon-snap-gene-1.163	A0A2H1CJU8|A0A2H1CJU8_FASHE_C2_domain_protein_(Fragment)_OS=Fasciola_hepatica_OX=6192_GN=D915_04902_PE=4_SV=1	A0A2H1CJU8	99.7	5.6e-310	1072	91.5	60.1
maker-scaffold10x_1499_pilon-snap-gene-0.22-mRNA-1_transcript=maker-scaffold10x_1499_pilon-snap-gene-0.22-mRNA-1_gene=maker-scaffold10x_1499_pilon-snap-gene-0.22	A0A2H1CJU9|A0A2H1CJU9_FASHE_Translocation_protein_Sec62_OS=Fasciola_hepatica_OX=6192_GN=D915_05544_PE=4_SV=1	A0A2H1CJU9	95.9	1.9e-183	651	100	100
maker-scaffold10x_217_pilon-snap-gene-0.54-mRNA-1_transcript=maker-scaffold10x_217_pilon-snap-gene-0.54-mRNA-1_gene=maker-scaffold10x_217_pilon-snap-gene-0.54	A0A2H1CJW3|A0A2H1CJW3_FASHE_EF_hand_OS=Fasciola_hepatica_OX=6192_GN=D915_04923_PE=4_SV=1	A0A2H1CJW3	86	3.4e-65	256.5	100	100
maker-scaffold10x_589_pilon-augustus-gene-0.51-mRNA-1_transcript=maker-scaffold10x_589_pilon-augustus-gene-0.51-mRNA-1_gene=maker-scaffold10x_589_pilon-augustus-gene-0.51	A0A2H1CJX0|A0A2H1CJX0_FASHE_Methionine_aminopeptidase_1D_mitochondrial_OS=Fasciola_hepatica_OX=6192_GN=D915_003454_PE=4_SV=1	A0A2H1CJX0	99.8	1.7e-233	817.4	100	100
augustus_masked-scaffold10x_1597_pilon-processed-gene-0.61-mRNA-1_transcript=augustus_masked-scaffold10x_1597_pilon-processed-gene-0.61-mRNA-1_gene=augustus_masked-scaffold10x_1597_pilon-processed-gene-0.61	A0A2H1CJX6|A0A2H1CJX6_FASHE_Amidase_OS=Fasciola_hepatica_OX=6192_GN=D915_002660_PE=4_SV=1	A0A2H1CJX6	99.7	0	1260.4	100	100
maker-scaffold10x_410_pilon-snap-gene-0.2-mRNA-1_transcript=maker-scaffold10x_410_pilon-snap-gene-0.2-mRNA-1_gene=maker-scaffold10x_410_pilon-snap-gene-0.2	A0A2H1CJY5|A0A2H1CJY5_FASHE_Histone_acetyltransferase_type_B_catalytic_subunit_OS=Fasciola_hepatica_OX=6192_GN=D915_003304_PE=4_SV=1	A0A2H1CJY5	100	1.2e-255	891	100	100
maker-scaffold10x_1597_pilon-snap-gene-0.14-mRNA-1_transcript=maker-scaffold10x_1597_pilon-snap-gene-0.14-mRNA-1_gene=maker-scaffold10x_1597_pilon-snap-gene-0.14	A0A2H1CJY7|A0A2H1CJY7_FASHE_Amidase_OS=Fasciola_hepatica_OX=6192_GN=D915_04866_PE=4_SV=1	A0A2H1CJY7	99.5	0	1149	48	97.3
maker-scaffold10x_213_pilon-snap-gene-0.47-mRNA-1_transcript=maker-scaffold10x_213_pilon-snap-gene-0.47-mRNA-1_gene=maker-scaffold10x_213_pilon-snap-gene-0.47	A0A2H1CJZ3|A0A2H1CJZ3_FASHE_SarA_OS=Fasciola_hepatica_OX=6192_GN=D915_003656_PE=3_SV=1	A0A2H1CJZ3	100	5.4e-110	406	100	100
maker-scaffold10x_2330_pilon-snap-gene-0.1-mRNA-1_transcript=maker-scaffold10x_2330_pilon-snap-gene-0.1-mRNA-1_gene=maker-scaffold10x_2330_pilon-snap-gene-0.1	A0A2H1CJZ4|A0A2H1CJZ4_FASHE_Zinc_finger_protein_OS=Fasciola_hepatica_OX=6192_GN=D915_002849_PE=4_SV=1	A0A2H1CJZ4	100	1.5e-134	488.4	62.3	100
snap_masked-scaffold10x_920_pilon-processed-gene-0.5-mRNA-1_transcript=snap_masked-scaffold10x_920_pilon-processed-gene-0.5-mRNA-1_gene=snap_masked-scaffold10x_920_pilon-processed-gene-0.5	A0A2H1CK12|A0A2H1CK12_FASHE_Homeobox_domain_protein_(Fragment)_OS=Fasciola_hepatica_OX=6192_GN=D915_16245_PE=4_SV=1	A0A2H1CK12	76.6	0	2200.2	74.7	95.3
maker-scaffold10x_270_pilon-pred_gff_StringTie-gene-0.50-mRNA-1_transcript=maker-scaffold10x_270_pilon-pred_gff_StringTie-gene-0.50-mRNA-1_gene=maker-scaffold10x_270_pilon-pred_gff_StringTie-gene-0.50	A0A2H1CK19|A0A2H1CK19_FASHE_Cation_transporter_protein_OS=Fasciola_hepatica_OX=6192_GN=D915_003047_PE=4_SV=1	A0A2H1CK19	100	0	1122.5	100	100
snap_masked-scaffold10x_1597_pilon-processed-gene-0.78-mRNA-1_transcript=snap_masked-scaffold10x_1597_pilon-processed-gene-0.78-mRNA-1_gene=snap_masked-scaffold10x_1597_pilon-processed-gene-0.78	A0A2H1CK31|A0A2H1CK31_FASHE_ATP_P2X_receptor_OS=Fasciola_hepatica_OX=6192_GN=D915_003158_PE=4_SV=1	A0A2H1CK31	99.8	0	1277.3	100	100
maker-scaffold10x_245_pilon-snap-gene-0.128-mRNA-1_transcript=maker-scaffold10x_245_pilon-snap-gene-0.128-mRNA-1_gene=maker-scaffold10x_245_pilon-snap-gene-0.128	A0A2H1CK35|A0A2H1CK35_FASHE_Regulator_of_G_protein_signaling-like_domain_protein_OS=Fasciola_hepatica_OX=6192_GN=D915_04858_PE=4_SV=1	A0A2H1CK35	84.8	5.1e-199	704.1	35.4	100
snap_masked-scaffold10x_474_pilon-processed-gene-0.0-mRNA-1_transcript=snap_masked-scaffold10x_474_pilon-processed-gene-0.0-mRNA-1_gene=snap_masked-scaffold10x_474_pilon-processed-gene-0.0	A0A2H1CK74|A0A2H1CK74_FASHE_Zinc_finger_C2H2_type_OS=Fasciola_hepatica_OX=6192_GN=D915_003173_PE=4_SV=1	A0A2H1CK74	100	3.4e-49	203.4	100	29.3
maker-scaffold10x_14_pilon-snap-gene-0.125-mRNA-1_transcript=maker-scaffold10x_14_pilon-snap-gene-0.125-mRNA-1_gene=maker-scaffold10x_14_pilon-snap-gene-0.125	A0A2H1CK95|A0A2H1CK95_FASHE_CRAL-TRIO_domain-containing_protein_OS=Fasciola_hepatica_OX=6192_GN=D915_04740_PE=4_SV=1	A0A2H1CK95	99.5	1.1e-114	422.5	52.3	96.7
maker-scaffold10x_544_pilon-augustus-gene-0.45-mRNA-1_transcript=maker-scaffold10x_544_pilon-augustus-gene-0.45-mRNA-1_gene=maker-scaffold10x_544_pilon-augustus-gene-0.45	A0A2H1CKA1|A0A2H1CKA1_FASHE_Helicase_C-terminal_domain-containing_protein_OS=Fasciola_hepatica_OX=6192_GN=D915_04776_PE=4_SV=1	A0A2H1CKA1	78.2	3.6e-56	226.5	100	73.9
maker-scaffold10x_1597_pilon-snap-gene-0.0-mRNA-1_transcript=maker-scaffold10x_1597_pilon-snap-gene-0.0-mRNA-1_gene=maker-scaffold10x_1597_pilon-snap-gene-0.0	A0A2H1CKA3|A0A2H1CKA3_FASHE_Transcription_factor_glial_cells_missing_OS=Fasciola_hepatica_OX=6192_GN=D915_003161_PE=4_SV=1	A0A2H1CKA3	99.3	0	1606.3	99.8	97.6
snap_masked-scaffold10x_824_pilon-processed-gene-0.23-mRNA-1_transcript=snap_masked-scaffold10x_824_pilon-processed-gene-0.23-mRNA-1_gene=snap_masked-scaffold10x_824_pilon-processed-gene-0.23	A0A2H1CKC8|A0A2H1CKC8_FASHE_Josephin_domain_containing_1_OS=Fasciola_hepatica_OX=6192_GN=D915_003151_PE=4_SV=1	A0A2H1CKC8	100	8.3e-112	412.5	70	100
maker-scaffold10x_636_pilon-augustus-gene-0.32-mRNA-1_transcript=maker-scaffold10x_636_pilon-augustus-gene-0.32-mRNA-1_gene=maker-scaffold10x_636_pilon-augustus-gene-0.32	A0A2H1CKG3|A0A2H1CKG3_FASHE_EF_hand_OS=Fasciola_hepatica_OX=6192_GN=D915_04679_PE=4_SV=1	A0A2H1CKG3	99.4	5.4e-94	352.8	87	100
maker-scaffold10x_636_pilon-augustus-gene-0.31-mRNA-1_transcript=maker-scaffold10x_636_pilon-augustus-gene-0.31-mRNA-1_gene=maker-scaffold10x_636_pilon-augustus-gene-0.31	A0A2H1CKG8|A0A2H1CKG8_FASHE_EF_hand_OS=Fasciola_hepatica_OX=6192_GN=D915_003073_PE=4_SV=1	A0A2H1CKG8	98.6	5e-31	142.1	100	40.4
maker-scaffold10x_280_pilon-snap-gene-0.134-mRNA-1_transcript=maker-scaffold10x_280_pilon-snap-gene-0.134-mRNA-1_gene=maker-scaffold10x_280_pilon-snap-gene-0.134	A0A2H1CKH3|A0A2H1CKH3_FASHE_Histidine_acid_phosphatase_OS=Fasciola_hepatica_OX=6192_GN=D915_04661_PE=3_SV=1	A0A2H1CKH3	100	1.5e-172	614.4	100	82.9
maker-scaffold10x_1332_pilon-snap-gene-0.41-mRNA-1_transcript=maker-scaffold10x_1332_pilon-snap-gene-0.41-mRNA-1_gene=maker-scaffold10x_1332_pilon-snap-gene-0.41	A0A2H1CKH7|A0A2H1CKH7_FASHE_DNA_repair_helicase_rad25_OS=Fasciola_hepatica_OX=6192_GN=D915_003177_PE=4_SV=1	A0A2H1CKH7	99.8	0	1833.9	100	100
maker-scaffold10x_223_pilon-snap-gene-0.9-mRNA-1_transcript=maker-scaffold10x_223_pilon-snap-gene-0.9-mRNA-1_gene=maker-scaffold10x_223_pilon-snap-gene-0.9	A0A2H1CKH9|A0A2H1CKH9_FASHE_Lysophospholipid_acyltransferase_2_OS=Fasciola_hepatica_OX=6192_GN=D915_002734_PE=3_SV=1	A0A2H1CKH9	100	0	1201.8	53	100
maker-scaffold10x_313_pilon-snap-gene-0.69-mRNA-1_transcript=maker-scaffold10x_313_pilon-snap-gene-0.69-mRNA-1_gene=maker-scaffold10x_313_pilon-snap-gene-0.69	A0A2H1CKI1|A0A2H1CKI1_FASHE_RFXA_RFXANK_bdg_domain-containing_protein_OS=Fasciola_hepatica_OX=6192_GN=D915_002996_PE=4_SV=1	A0A2H1CKI1	100	8.4e-149	535.4	100	100
maker-scaffold10x_147_pilon-augustus-gene-0.78-mRNA-1_transcript=maker-scaffold10x_147_pilon-augustus-gene-0.78-mRNA-1_gene=maker-scaffold10x_147_pilon-augustus-gene-0.78	A0A2H1CKI7|A0A2H1CKI7_FASHE_COP9_constitutive_photomorphogenic_subunit_2_OS=Fasciola_hepatica_OX=6192_GN=D915_002562_PE=4_SV=1	A0A2H1CKI7	100	1.1e-248	867.8	100	100
maker-scaffold10x_713_pilon-snap-gene-0.104-mRNA-1_transcript=maker-scaffold10x_713_pilon-snap-gene-0.104-mRNA-1_gene=maker-scaffold10x_713_pilon-snap-gene-0.104	A0A2H1CKJ3|A0A2H1CKJ3_FASHE_5-hydroxytryptamine_receptor_OS=Fasciola_hepatica_OX=6192_GN=D915_003142_PE=3_SV=1	A0A2H1CKJ3	99.5	0	1505.3	84.5	98.7
snap_masked-scaffold10x_211_pilon-processed-gene-0.52-mRNA-1_transcript=snap_masked-scaffold10x_211_pilon-processed-gene-0.52-mRNA-1_gene=snap_masked-scaffold10x_211_pilon-processed-gene-0.52	A0A2H1CKK9|A0A2H1CKK9_FASHE_BTB/POZ_domain_protein_OS=Fasciola_hepatica_OX=6192_GN=D915_003588_PE=4_SV=1	A0A2H1CKK9	100	1.3e-204	721.1	100	100
maker-scaffold10x_246_pilon-snap-gene-0.22-mRNA-1_transcript=maker-scaffold10x_246_pilon-snap-gene-0.22-mRNA-1_gene=maker-scaffold10x_246_pilon-snap-gene-0.22	A0A2H1CKL6|A0A2H1CKL6_FASHE_AN1-like_Zinc_finger_OS=Fasciola_hepatica_OX=6192_GN=D915_002975_PE=4_SV=1	A0A2H1CKL6	100	2e-107	397.5	100	100
maker-scaffold10x_331_pilon-augustus-gene-0.86-mRNA-1_transcript=maker-scaffold10x_331_pilon-augustus-gene-0.86-mRNA-1_gene=maker-scaffold10x_331_pilon-augustus-gene-0.86	A0A2H1CKL7|A0A2H1CKL7_FASHE_Ubiquitin_domain-containing_protein_2_OS=Fasciola_hepatica_OX=6192_GN=D915_003366_PE=4_SV=1	A0A2H1CKL7	100	1.4e-220	774.2	100	100
augustus_masked-scaffold10x_1318_pilon-processed-gene-0.40-mRNA-1_transcript=augustus_masked-scaffold10x_1318_pilon-processed-gene-0.40-mRNA-1_gene=augustus_masked-scaffold10x_1318_pilon-processed-gene-0.40	A0A2H1CKN9|A0A2H1CKN9_FASHE_Histone_H2A_OS=Fasciola_hepatica_OX=6192_GN=D915_002864_PE=3_SV=1	A0A2H1CKN9	100	2.1e-65	257.3	100	100
augustus_masked-scaffold10x_303_pilon-processed-gene-0.95-mRNA-1_transcript=augustus_masked-scaffold10x_303_pilon-processed-gene-0.95-mRNA-1_gene=augustus_masked-scaffold10x_303_pilon-processed-gene-0.95	A0A2H1CKP4|A0A2H1CKP4_FASHE_RRM_domain-containing_protein_OS=Fasciola_hepatica_OX=6192_GN=D915_04601_PE=4_SV=1	A0A2H1CKP4	100	0	1417.5	42.9	99
maker-scaffold10x_286_pilon-snap-gene-0.0-mRNA-1_transcript=maker-scaffold10x_286_pilon-snap-gene-0.0-mRNA-1_gene=maker-scaffold10x_286_pilon-snap-gene-0.0	A0A2H1CKR4|A0A2H1CKR4_FASHE_Estradiol_17-beta-dehydrogenase_12-A_OS=Fasciola_hepatica_OX=6192_GN=D915_003044_PE=4_SV=1	A0A2H1CKR4	99.7	8.3e-174	618.6	100	100
maker-scaffold10x_759_pilon-snap-gene-0.21-mRNA-1_transcript=maker-scaffold10x_759_pilon-snap-gene-0.21-mRNA-1_gene=maker-scaffold10x_759_pilon-snap-gene-0.21	A0A2H1CKS4|A0A2H1CKS4_FASHE_Adenosine_kinase_A_OS=Fasciola_hepatica_OX=6192_GN=D915_002818_PE=4_SV=1	A0A2H1CKS4	100	2.8e-199	703.4	100	100
maker-scaffold10x_554_pilon-augustus-gene-0.15-mRNA-1_transcript=maker-scaffold10x_554_pilon-augustus-gene-0.15-mRNA-1_gene=maker-scaffold10x_554_pilon-augustus-gene-0.15	A0A2H1CKS8|A0A2H1CKS8_FASHE_Estradiol_17-beta-dehydrogenase_OS=Fasciola_hepatica_OX=6192_GN=D915_003045_PE=3_SV=1	A0A2H1CKS8	99.7	1.6e-161	577.8	100	100
snap_masked-scaffold10x_302_pilon-processed-gene-0.129-mRNA-1_transcript=snap_masked-scaffold10x_302_pilon-processed-gene-0.129-mRNA-1_gene=snap_masked-scaffold10x_302_pilon-processed-gene-0.129	A0A2H1CKT2|A0A2H1CKT2_FASHE_Universal_stress_family_protein_OS=Fasciola_hepatica_OX=6192_GN=D915_003094_PE=4_SV=1	A0A2H1CKT2	99.5	4.8e-98	366.3	91.5	100
maker-scaffold10x_637_pilon-pred_gff_StringTie-gene-0.97-mRNA-1_transcript=maker-scaffold10x_637_pilon-pred_gff_StringTie-gene-0.97-mRNA-1_gene=maker-scaffold10x_637_pilon-pred_gff_StringTie-gene-0.97	A0A2H1CKV4|A0A2H1CKV4_FASHE_U2_snRNP_auxiliary_factor_large_subunit_OS=Fasciola_hepatica_OX=6192_GN=D915_002943_PE=3_SV=1	A0A2H1CKV4	100	5.4e-271	942.2	100	100
maker-scaffold10x_384_pilon-snap-gene-0.56-mRNA-1_transcript=maker-scaffold10x_384_pilon-snap-gene-0.56-mRNA-1_gene=maker-scaffold10x_384_pilon-snap-gene-0.56	A0A2H1CKX9|A0A2H1CKX9_FASHE_YT521-B-like_family_protein_OS=Fasciola_hepatica_OX=6192_GN=D915_04493_PE=4_SV=1	A0A2H1CKX9	99.5	0	1399.8	98.1	96.3
maker-scaffold10x_1619_pilon-snap-gene-0.16-mRNA-1_transcript=maker-scaffold10x_1619_pilon-snap-gene-0.16-mRNA-1_gene=maker-scaffold10x_1619_pilon-snap-gene-0.16	A0A2H1CL19|A0A2H1CL19_FASHE_DUF4201_domain-containing_protein_OS=Fasciola_hepatica_OX=6192_GN=D915_16234_PE=4_SV=1	A0A2H1CL19	100	1.6e-200	707.6	100	100
maker-scaffold10x_293_pilon-snap-gene-0.136-mRNA-1_transcript=maker-scaffold10x_293_pilon-snap-gene-0.136-mRNA-1_gene=maker-scaffold10x_293_pilon-snap-gene-0.136	A0A2H1CL62|A0A2H1CL62_FASHE_Surp_module_OS=Fasciola_hepatica_OX=6192_GN=D915_04457_PE=4_SV=1	A0A2H1CL62	100	3.2e-157	565.1	31.1	100
maker-scaffold10x_589_pilon-snap-gene-0.147-mRNA-1_transcript=maker-scaffold10x_589_pilon-snap-gene-0.147-mRNA-1_gene=maker-scaffold10x_589_pilon-snap-gene-0.147	A0A2H1CL68|A0A2H1CL68_FASHE_Homeobox_domain_protein_OS=Fasciola_hepatica_OX=6192_GN=D915_04403_PE=4_SV=1	A0A2H1CL68	92.8	0	1200.7	99.9	92.2
maker-scaffold10x_477_pilon-snap-gene-0.3-mRNA-1_transcript=maker-scaffold10x_477_pilon-snap-gene-0.3-mRNA-1_gene=maker-scaffold10x_477_pilon-snap-gene-0.3	A0A2H1CLB9|A0A2H1CLB9_FASHE_28S_ribosomal_protein_S17_mitochondrial_OS=Fasciola_hepatica_OX=6192_GN=D915_002684_PE=4_SV=1	A0A2H1CLB9	100	5.4e-101	375.9	100	100
maker-scaffold10x_794_pilon-snap-gene-0.126-mRNA-1_transcript=maker-scaffold10x_794_pilon-snap-gene-0.126-mRNA-1_gene=maker-scaffold10x_794_pilon-snap-gene-0.126	A0A2H1CLC7|A0A2H1CLC7_FASHE_ATP_synthase_subunit_beta_OS=Fasciola_hepatica_OX=6192_GN=D915_002868_PE=3_SV=1	A0A2H1CLC7	100	1.3e-288	1000.7	100	100
maker-scaffold10x_908_pilon-snap-gene-0.91-mRNA-1_transcript=maker-scaffold10x_908_pilon-snap-gene-0.91-mRNA-1_gene=maker-scaffold10x_908_pilon-snap-gene-0.91	A0A2H1CLF6|A0A2H1CLF6_FASHE_Globin_(Fragment)_OS=Fasciola_hepatica_OX=6192_GN=D915_05117_PE=3_SV=1	A0A2H1CLF6	97.4	6.6e-77	295.8	92.2	72.6
maker-scaffold10x_851_pilon-snap-gene-0.32-mRNA-1_transcript=maker-scaffold10x_851_pilon-snap-gene-0.32-mRNA-1_gene=maker-scaffold10x_851_pilon-snap-gene-0.32	A0A2H1CLG1|A0A2H1CLG1_FASHE_G10_protein_OS=Fasciola_hepatica_OX=6192_GN=D915_002751_PE=4_SV=1	A0A2H1CLG1	100	7.2e-80	305.4	100	100
maker-scaffold10x_730_pilon-snap-gene-0.74-mRNA-1_transcript=maker-scaffold10x_730_pilon-snap-gene-0.74-mRNA-1_gene=maker-scaffold10x_730_pilon-snap-gene-0.74	A0A2H1CLI9|A0A2H1CLI9_FASHE_C2H2-type_domain-containing_protein_OS=Fasciola_hepatica_OX=6192_GN=D915_04291_PE=4_SV=1	A0A2H1CLI9	72.5	1.2e-202	715.3	96.8	73.4
maker-scaffold10x_384_pilon-snap-gene-0.65-mRNA-1_transcript=maker-scaffold10x_384_pilon-snap-gene-0.65-mRNA-1_gene=maker-scaffold10x_384_pilon-snap-gene-0.65	A0A2H1CLK9|A0A2H1CLK9_FASHE_DHH_domain-containing_protein_OS=Fasciola_hepatica_OX=6192_GN=D915_04235_PE=4_SV=1	A0A2H1CLK9	98.8	1.5e-131	479.6	32.5	96.1
maker-scaffold10x_744_pilon-pred_gff_StringTie-gene-0.56-mRNA-1_transcript=maker-scaffold10x_744_pilon-pred_gff_StringTie-gene-0.56-mRNA-1_gene=maker-scaffold10x_744_pilon-pred_gff_StringTie-gene-0.56	A0A2H1CLM9|A0A2H1CLM9_FASHE_DnaK_family_protein_OS=Fasciola_hepatica_OX=6192_GN=D915_002704_PE=3_SV=1	A0A2H1CLM9	100	0	1077	100	100
maker-scaffold10x_1010_pilon-pred_gff_StringTie-gene-0.79-mRNA-1_transcript=maker-scaffold10x_1010_pilon-pred_gff_StringTie-gene-0.79-mRNA-1_gene=maker-scaffold10x_1010_pilon-pred_gff_StringTie-gene-0.79	A0A2H1CLP7|A0A2H1CLP7_FASHE_ADP-ribosylation_factor_OS=Fasciola_hepatica_OX=6192_GN=D915_002755_PE=3_SV=1	A0A2H1CLP7	100	5.7e-98	365.9	100	100
maker-scaffold10x_538_pilon-augustus-gene-0.86-mRNA-1_transcript=maker-scaffold10x_538_pilon-augustus-gene-0.86-mRNA-1_gene=maker-scaffold10x_538_pilon-augustus-gene-0.86	A0A2H1CLQ5|A0A2H1CLQ5_FASHE_Sulfotransferase_OS=Fasciola_hepatica_OX=6192_GN=D915_002647_PE=4_SV=1	A0A2H1CLQ5	99.2	4.5e-149	536.2	100	100
maker-scaffold10x_269_pilon-pred_gff_StringTie-gene-0.66-mRNA-1_transcript=maker-scaffold10x_269_pilon-pred_gff_StringTie-gene-0.66-mRNA-1_gene=maker-scaffold10x_269_pilon-pred_gff_StringTie-gene-0.66	A0A2H1CLU0|A0A2H1CLU0_FASHE_Actin_OS=Fasciola_hepatica_OX=6192_GN=D915_002697_PE=3_SV=1	A0A2H1CLU0	100	2.4e-220	773.5	100	100
snap_masked-scaffold10x_269_pilon-processed-gene-0.35-mRNA-1_transcript=snap_masked-scaffold10x_269_pilon-processed-gene-0.35-mRNA-1_gene=snap_masked-scaffold10x_269_pilon-processed-gene-0.35	A0A2H1CLU1|A0A2H1CLU1_FASHE_Zinc_finger,_C2H2_type_OS=Fasciola_hepatica_OX=6192_GN=D915_04151_PE=4_SV=1	A0A2H1CLU1	99.3	0	1132.1	100	100
maker-scaffold10x_269_pilon-pred_gff_StringTie-gene-0.65-mRNA-1_transcript=maker-scaffold10x_269_pilon-pred_gff_StringTie-gene-0.65-mRNA-1_gene=maker-scaffold10x_269_pilon-pred_gff_StringTie-gene-0.65	A0A2H1CLU7|A0A2H1CLU7_FASHE_Actin_OS=Fasciola_hepatica_OX=6192_GN=D915_002698_PE=3_SV=1	A0A2H1CLU7	100	3e-207	729.9	100	100
maker-scaffold10x_61_pilon-snap-gene-0.36-mRNA-1_transcript=maker-scaffold10x_61_pilon-snap-gene-0.36-mRNA-1_gene=maker-scaffold10x_61_pilon-snap-gene-0.36	A0A2H1CLW2|A0A2H1CLW2_FASHE_Superoxide_dismutase_[Cu-Zn]_OS=Fasciola_hepatica_OX=6192_GN=D915_003308_PE=3_SV=1	A0A2H1CLW2	100	2.8e-82	313.5	100	100
maker-scaffold10x_77_pilon-augustus-gene-0.29-mRNA-1_transcript=maker-scaffold10x_77_pilon-augustus-gene-0.29-mRNA-1_gene=maker-scaffold10x_77_pilon-augustus-gene-0.29	A0A2H1CLY7|A0A2H1CLY7_FASHE_60S_ribosomal_protein_L18a_OS=Fasciola_hepatica_OX=6192_GN=D915_002466_PE=3_SV=1	A0A2H1CLY7	100	3e-96	360.1	100	100
augustus_masked-scaffold10x_81_pilon-processed-gene-0.139-mRNA-1_transcript=augustus_masked-scaffold10x_81_pilon-processed-gene-0.139-mRNA-1_gene=augustus_masked-scaffold10x_81_pilon-processed-gene-0.139	A0A2H1CM05|A0A2H1CM05_FASHE_Coiled-coil_domain-containing_protein_37_OS=Fasciola_hepatica_OX=6192_GN=D915_002630_PE=4_SV=1	A0A2H1CM05	100	2.6e-245	856.7	100	61.8
maker-scaffold10x_798_pilon-snap-gene-0.23-mRNA-1_transcript=maker-scaffold10x_798_pilon-snap-gene-0.23-mRNA-1_gene=maker-scaffold10x_798_pilon-snap-gene-0.23	A0A2H1CM23|A0A2H1CM23_FASHE_Surfactant_protein_B_OS=Fasciola_hepatica_OX=6192_GN=D915_04718_PE=4_SV=1	A0A2H1CM23	99.6	5.3e-133	484.2	34.9	89.4
maker-scaffold10x_1013_pilon-snap-gene-0.115-mRNA-1_transcript=maker-scaffold10x_1013_pilon-snap-gene-0.115-mRNA-1_gene=maker-scaffold10x_1013_pilon-snap-gene-0.115	A0A2H1CM61|A0A2H1CM61_FASHE_Nucleosome_assembly_protein_OS=Fasciola_hepatica_OX=6192_GN=D915_002687_PE=3_SV=1	A0A2H1CM61	100	4.1e-131	476.5	100	100
maker-scaffold10x_280_pilon-snap-gene-0.131-mRNA-1_transcript=maker-scaffold10x_280_pilon-snap-gene-0.131-mRNA-1_gene=maker-scaffold10x_280_pilon-snap-gene-0.131	A0A2H1CM68|A0A2H1CM68_FASHE_DnaK_family_protein_OS=Fasciola_hepatica_OX=6192_GN=D915_002804_PE=3_SV=1	A0A2H1CM68	99.8	0	1115.9	100	89.9
maker-scaffold10x_1424_pilon-snap-gene-0.15-mRNA-1_transcript=maker-scaffold10x_1424_pilon-snap-gene-0.15-mRNA-1_gene=maker-scaffold10x_1424_pilon-snap-gene-0.15	A0A2H1CM70|A0A2H1CM70_FASHE_Barrier_to_autointegration_factor_OS=Fasciola_hepatica_OX=6192_GN=D915_04009_PE=4_SV=1	A0A2H1CM70	86.5	3.2e-34	153.3	89	68.2
maker-scaffold10x_474_pilon-augustus-gene-0.35-mRNA-1_transcript=maker-scaffold10x_474_pilon-augustus-gene-0.35-mRNA-1_gene=maker-scaffold10x_474_pilon-augustus-gene-0.35	A0A2H1CM93|A0A2H1CM93_FASHE_Ubiquitin_carboxyl-terminal_hydrolase_OS=Fasciola_hepatica_OX=6192_GN=D915_04838_PE=3_SV=1	A0A2H1CM93	55.9	1.7e-29	137.5	91.4	52.4
maker-scaffold10x_589_pilon-snap-gene-0.132-mRNA-1_transcript=maker-scaffold10x_589_pilon-snap-gene-0.132-mRNA-1_gene=maker-scaffold10x_589_pilon-snap-gene-0.132	A0A2H1CM94|A0A2H1CM94_FASHE_Cytosolic_large_ribosomal_subunit_protein_L30_OS=Fasciola_hepatica_OX=6192_GN=D915_002616_PE=4_SV=1	A0A2H1CM94	100	7.2e-60	238.8	100	100
maker-scaffold10x_416_pilon-augustus-gene-0.19-mRNA-1_transcript=maker-scaffold10x_416_pilon-augustus-gene-0.19-mRNA-1_gene=maker-scaffold10x_416_pilon-augustus-gene-0.19	A0A2H1CMC5|A0A2H1CMC5_FASHE_Kinesin_motor_domain_protein_(Fragment)_OS=Fasciola_hepatica_OX=6192_GN=D915_04804_PE=3_SV=1	A0A2H1CMC5	98.9	6.7e-41	176	60.3	8.5
maker-scaffold10x_949_pilon-augustus-gene-0.26-mRNA-1_transcript=maker-scaffold10x_949_pilon-augustus-gene-0.26-mRNA-1_gene=maker-scaffold10x_949_pilon-augustus-gene-0.26	A0A2H1CMD2|A0A2H1CMD2_FASHE_Protein_family_protein_OS=Fasciola_hepatica_OX=6192_GN=D915_03979_PE=4_SV=1	A0A2H1CMD2	100	5.4e-18	100.5	22.4	27.2
maker-scaffold10x_544_pilon-snap-gene-0.31-mRNA-1_transcript=maker-scaffold10x_544_pilon-snap-gene-0.31-mRNA-1_gene=maker-scaffold10x_544_pilon-snap-gene-0.31	A0A2H1CME8|A0A2H1CME8_FASHE_Leucine_Rich_repeat-containing_domain_protein_OS=Fasciola_hepatica_OX=6192_GN=D915_04774_PE=4_SV=1	A0A2H1CME8	97.5	0	1458.7	100	100
maker-scaffold10x_949_pilon-snap-gene-0.1-mRNA-1_transcript=maker-scaffold10x_949_pilon-snap-gene-0.1-mRNA-1_gene=maker-scaffold10x_949_pilon-snap-gene-0.1	A0A2H1CMF5|A0A2H1CMF5_FASHE_Pyrimidine_5'-nucleotidase_OS=Fasciola_hepatica_OX=6192_GN=D915_03980_PE=4_SV=1	A0A2H1CMF5	99.6	7.7e-130	472.6	71.9	74.1
maker-scaffold10x_217_pilon-snap-gene-1.143-mRNA-1_transcript=maker-scaffold10x_217_pilon-snap-gene-1.143-mRNA-1_gene=maker-scaffold10x_217_pilon-snap-gene-1.143	A0A2H1CMF8|A0A2H1CMF8_FASHE_HMG_box_OS=Fasciola_hepatica_OX=6192_GN=D915_04767_PE=4_SV=1	A0A2H1CMF8	81.6	1.3e-269	937.6	100	76.8
maker-scaffold10x_759_pilon-snap-gene-0.22-mRNA-1_transcript=maker-scaffold10x_759_pilon-snap-gene-0.22-mRNA-1_gene=maker-scaffold10x_759_pilon-snap-gene-0.22	A0A2H1CMI2|A0A2H1CMI2_FASHE_Adenosine_kinase_A_OS=Fasciola_hepatica_OX=6192_GN=D915_002816_PE=4_SV=1	A0A2H1CMI2	100	7.5e-200	705.3	100	100
maker-scaffold10x_798_pilon-snap-gene-0.22-mRNA-1_transcript=maker-scaffold10x_798_pilon-snap-gene-0.22-mRNA-1_gene=maker-scaffold10x_798_pilon-snap-gene-0.22	A0A2H1CMK7|A0A2H1CMK7_FASHE_Ligand-binding_domain_of_nuclear_hormone_receptor_OS=Fasciola_hepatica_OX=6192_GN=D915_04717_PE=3_SV=1	A0A2H1CMK7	92	0	1168.3	54.6	91.3
maker-scaffold10x_894_pilon-snap-gene-0.100-mRNA-1_transcript=maker-scaffold10x_894_pilon-snap-gene-0.100-mRNA-1_gene=maker-scaffold10x_894_pilon-snap-gene-0.100	A0A2H1CMM1|A0A2H1CMM1_FASHE_Alpha_amylase,_catalytic_domain_protein_OS=Fasciola_hepatica_OX=6192_GN=D915_03850_PE=4_SV=1	A0A2H1CMM1	93.5	0	1174.5	100	100
maker-scaffold10x_1464_pilon-snap-gene-0.33-mRNA-1_transcript=maker-scaffold10x_1464_pilon-snap-gene-0.33-mRNA-1_gene=maker-scaffold10x_1464_pilon-snap-gene-0.33	A0A2H1CMM8|A0A2H1CMM8_FASHE_BEN_domain-containing_protein_OS=Fasciola_hepatica_OX=6192_GN=D915_03855_PE=4_SV=1	A0A2H1CMM8	98.5	1.3e-141	513.1	33.5	100
maker-scaffold10x_773_pilon-snap-gene-0.63-mRNA-1_transcript=maker-scaffold10x_773_pilon-snap-gene-0.63-mRNA-1_gene=maker-scaffold10x_773_pilon-snap-gene-0.63	A0A2H1CMP4|A0A2H1CMP4_FASHE_Histone_1_OS=Fasciola_hepatica_OX=6192_GN=D915_002582_PE=3_SV=1	A0A2H1CMP4	100	1.1e-44	188.7	96.4	91.4
augustus_masked-scaffold10x_481_pilon-processed-gene-0.40-mRNA-1_transcript=augustus_masked-scaffold10x_481_pilon-processed-gene-0.40-mRNA-1_gene=augustus_masked-scaffold10x_481_pilon-processed-gene-0.40	A0A2H1CMR3|A0A2H1CMR3_FASHE_Cyclic_nucleotide-binding_domain_protein_OS=Fasciola_hepatica_OX=6192_GN=D915_03802_PE=4_SV=1	A0A2H1CMR3	98.2	6.5e-197	695.7	100	100
maker-scaffold10x_297_pilon-augustus-gene-0.107-mRNA-1_transcript=maker-scaffold10x_297_pilon-augustus-gene-0.107-mRNA-1_gene=maker-scaffold10x_297_pilon-augustus-gene-0.107	A0A2H1CMR8|A0A2H1CMR8_FASHE_FeS_assembly_P_domain-containing_protein_OS=Fasciola_hepatica_OX=6192_GN=D915_03806_PE=4_SV=1	A0A2H1CMR8	100	1.5e-89	337.8	100	100
maker-scaffold10x_589_pilon-snap-gene-0.140-mRNA-1_transcript=maker-scaffold10x_589_pilon-snap-gene-0.140-mRNA-1_gene=maker-scaffold10x_589_pilon-snap-gene-0.140	A0A2H1CMS2|A0A2H1CMS2_FASHE_Solute_carrier_family_35_member_F2_OS=Fasciola_hepatica_OX=6192_GN=D915_002933_PE=4_SV=1	A0A2H1CMS2	98.5	4.9e-187	662.9	85.1	91
augustus_masked-scaffold10x_894_pilon-processed-gene-0.95-mRNA-1_transcript=augustus_masked-scaffold10x_894_pilon-processed-gene-0.95-mRNA-1_gene=augustus_masked-scaffold10x_894_pilon-processed-gene-0.95	A0A2H1CMS6|A0A2H1CMS6_FASHE_Aamy_domain-containing_protein_OS=Fasciola_hepatica_OX=6192_GN=D915_002680_PE=4_SV=1	A0A2H1CMS6	58.2	1e-153	552	100	100
maker-scaffold10x_486_pilon-snap-gene-0.86-mRNA-1_transcript=maker-scaffold10x_486_pilon-snap-gene-0.86-mRNA-1_gene=maker-scaffold10x_486_pilon-snap-gene-0.86	A0A2H1CMV7|A0A2H1CMV7_FASHE_EB1_C-terminal_domain-containing_protein_(Fragment)_OS=Fasciola_hepatica_OX=6192_GN=D915_03769_PE=4_SV=1	A0A2H1CMV7	92.4	1e-233	818.1	97	96.8
maker-scaffold10x_25_pilon-snap-gene-0.29-mRNA-1_transcript=maker-scaffold10x_25_pilon-snap-gene-0.29-mRNA-1_gene=maker-scaffold10x_25_pilon-snap-gene-0.29	A0A2H1CMW6|A0A2H1CMW6_FASHE_Kazal-type_serine_protease_inhibitor_domain_protein_OS=Fasciola_hepatica_OX=6192_GN=D915_03778_PE=4_SV=1	A0A2H1CMW6	92.1	1e-126	463	44.3	84.8
maker-scaffold10x_647_pilon-snap-gene-0.39-mRNA-1_transcript=maker-scaffold10x_647_pilon-snap-gene-0.39-mRNA-1_gene=maker-scaffold10x_647_pilon-snap-gene-0.39	A0A2H1CMX7|A0A2H1CMX7_FASHE_TLC_domain-containing_protein_OS=Fasciola_hepatica_OX=6192_GN=D915_002184_PE=4_SV=1	A0A2H1CMX7	69.7	4.5e-61	243.8	63.3	99
maker-scaffold10x_139_pilon-snap-gene-0.4-mRNA-1_transcript=maker-scaffold10x_139_pilon-snap-gene-0.4-mRNA-1_gene=maker-scaffold10x_139_pilon-snap-gene-0.4	A0A2H1CN13|A0A2H1CN13_FASHE_Golgi_phosphoprotein_3_rotini_OS=Fasciola_hepatica_OX=6192_GN=D915_002448_PE=4_SV=1	A0A2H1CN13	100	3.3e-142	513.5	95.3	95
maker-scaffold10x_364_pilon-snap-gene-0.30-mRNA-1_transcript=maker-scaffold10x_364_pilon-snap-gene-0.30-mRNA-1_gene=maker-scaffold10x_364_pilon-snap-gene-0.30	A0A2H1CN29|A0A2H1CN29_FASHE_Sulfotransferase_family_protein_OS=Fasciola_hepatica_OX=6192_GN=D915_002429_PE=4_SV=1	A0A2H1CN29	98.6	8e-123	448.7	100	100
maker-scaffold10x_80_pilon-snap-gene-0.164-mRNA-1_transcript=maker-scaffold10x_80_pilon-snap-gene-0.164-mRNA-1_gene=maker-scaffold10x_80_pilon-snap-gene-0.164	A0A2H1CN61|A0A2H1CN61_FASHE_Regulator_of_G_protein_signaling_domain_protein_OS=Fasciola_hepatica_OX=6192_GN=D915_03723_PE=4_SV=1	A0A2H1CN61	100	1.1e-28	134.4	88.6	21.2
maker-scaffold10x_226_pilon-snap-gene-0.78-mRNA-1_transcript=maker-scaffold10x_226_pilon-snap-gene-0.78-mRNA-1_gene=maker-scaffold10x_226_pilon-snap-gene-0.78	A0A2H1CNC5|A0A2H1CNC5_FASHE_Cyclin_domain_protein_OS=Fasciola_hepatica_OX=6192_GN=D915_03590_PE=3_SV=1	A0A2H1CNC5	99.8	7.7e-236	825.1	100	100
maker-scaffold10x_1_pilon-snap-gene-0.148-mRNA-1_transcript=maker-scaffold10x_1_pilon-snap-gene-0.148-mRNA-1_gene=maker-scaffold10x_1_pilon-snap-gene-0.148	A0A2H1CNE7|A0A2H1CNE7_FASHE_Protein_yippee_OS=Fasciola_hepatica_OX=6192_GN=D915_002668_PE=4_SV=1	A0A2H1CNE7	99.8	2.2e-238	833.6	100	100
maker-scaffold10x_43_pilon-snap-gene-0.89-mRNA-1_transcript=maker-scaffold10x_43_pilon-snap-gene-0.89-mRNA-1_gene=maker-scaffold10x_43_pilon-snap-gene-0.89	A0A2H1CNG4|A0A2H1CNG4_FASHE_7_transmembrane_receptor_OS=Fasciola_hepatica_OX=6192_GN=D915_002370_PE=4_SV=1	A0A2H1CNG4	99.5	0	1445.6	100	100
snap_masked-scaffold10x_1280_pilon-processed-gene-0.18-mRNA-1_transcript=snap_masked-scaffold10x_1280_pilon-processed-gene-0.18-mRNA-1_gene=snap_masked-scaffold10x_1280_pilon-processed-gene-0.18	A0A2H1CNG9|A0A2H1CNG9_FASHE_KH_domain_protein_OS=Fasciola_hepatica_OX=6192_GN=D915_03545_PE=4_SV=1	A0A2H1CNG9	84.9	7.3e-56	225.7	95.2	86.3
maker-scaffold10x_1749_pilon-snap-gene-0.8-mRNA-1_transcript=maker-scaffold10x_1749_pilon-snap-gene-0.8-mRNA-1_gene=maker-scaffold10x_1749_pilon-snap-gene-0.8	A0A2H1CNI7|A0A2H1CNI7_FASHE_Parkin_coregulated_protein_OS=Fasciola_hepatica_OX=6192_GN=D915_002355_PE=4_SV=1	A0A2H1CNI7	99.6	8.5e-134	485.3	100	100
snap_masked-scaffold10x_917_pilon-processed-gene-0.99-mRNA-1_transcript=snap_masked-scaffold10x_917_pilon-processed-gene-0.99-mRNA-1_gene=snap_masked-scaffold10x_917_pilon-processed-gene-0.99	A0A2H1CNJ1|A0A2H1CNJ1_FASHE_Fork_head_domain_protein_OS=Fasciola_hepatica_OX=6192_GN=D915_03530_PE=4_SV=1	A0A2H1CNJ1	99.5	0	1146.7	100	100
maker-scaffold10x_1075_pilon-pred_gff_StringTie-gene-0.53-mRNA-1_transcript=maker-scaffold10x_1075_pilon-pred_gff_StringTie-gene-0.53-mRNA-1_gene=maker-scaffold10x_1075_pilon-pred_gff_StringTie-gene-0.53	A0A2H1CNJ7|A0A2H1CNJ7_FASHE_7_transmembrane_receptor_OS=Fasciola_hepatica_OX=6192_GN=D915_002373_PE=4_SV=1	A0A2H1CNJ7	100	6.1e-116	426	90.8	47.5
maker-scaffold10x_1437_pilon-snap-gene-0.44-mRNA-1_transcript=maker-scaffold10x_1437_pilon-snap-gene-0.44-mRNA-1_gene=maker-scaffold10x_1437_pilon-snap-gene-0.44	A0A2H1CNJ8|A0A2H1CNJ8_FASHE_Proteasome_subunit_alpha_type_OS=Fasciola_hepatica_OX=6192_GN=D915_002141_PE=3_SV=1	A0A2H1CNJ8	100	5.5e-136	492.7	100	100
maker-scaffold10x_296_pilon-augustus-gene-0.47-mRNA-1_transcript=maker-scaffold10x_296_pilon-augustus-gene-0.47-mRNA-1_gene=maker-scaffold10x_296_pilon-augustus-gene-0.47	A0A2H1CNK6|A0A2H1CNK6_FASHE_Putative_RNA-binding_protein_15_OS=Fasciola_hepatica_OX=6192_GN=D915_002297_PE=4_SV=1	A0A2H1CNK6	100	0	1553.1	100	100
maker-scaffold10x_296_pilon-snap-gene-0.32-mRNA-1_transcript=maker-scaffold10x_296_pilon-snap-gene-0.32-mRNA-1_gene=maker-scaffold10x_296_pilon-snap-gene-0.32	A0A2H1CNK7|A0A2H1CNK7_FASHE_CUB_domain_protein_OS=Fasciola_hepatica_OX=6192_GN=D915_16197_PE=4_SV=1	A0A2H1CNK7	91.9	2e-283	983.8	82.5	95.7
augustus_masked-scaffold10x_598_pilon-processed-gene-1.200-mRNA-1_transcript=augustus_masked-scaffold10x_598_pilon-processed-gene-1.200-mRNA-1_gene=augustus_masked-scaffold10x_598_pilon-processed-gene-1.200	A0A2H1CNK8|A0A2H1CNK8_FASHE_Ligand-gated_ion_channel_OS=Fasciola_hepatica_OX=6192_GN=D915_16201_PE=3_SV=1	A0A2H1CNK8	63.8	3e-125	457.2	93.8	27.8
maker-scaffold10x_598_pilon-augustus-gene-1.146-mRNA-1_transcript=maker-scaffold10x_598_pilon-augustus-gene-1.146-mRNA-1_gene=maker-scaffold10x_598_pilon-augustus-gene-1.146	A0A2H1CNK8|A0A2H1CNK8_FASHE_Ligand-gated_ion_channel_OS=Fasciola_hepatica_OX=6192_GN=D915_16201_PE=3_SV=1	A0A2H1CNK8	96.9	1.7e-66	261.2	80.2	8.5
maker-scaffold10x_19_pilon-augustus-gene-0.68-mRNA-1_transcript=maker-scaffold10x_19_pilon-augustus-gene-0.68-mRNA-1_gene=maker-scaffold10x_19_pilon-augustus-gene-0.68	A0A2H1CNL2|A0A2H1CNL2_FASHE_Apoptosis_regulator_protein,_Bcl-2_family_OS=Fasciola_hepatica_OX=6192_GN=D915_16202_PE=4_SV=1	A0A2H1CNL2	90.7	3.9e-98	366.7	100	100
maker-scaffold10x_436_pilon-snap-gene-0.25-mRNA-1_transcript=maker-scaffold10x_436_pilon-snap-gene-0.25-mRNA-1_gene=maker-scaffold10x_436_pilon-snap-gene-0.25	A0A2H1CNP3|A0A2H1CNP3_FASHE_40S_ribosomal_protein_S12_OS=Fasciola_hepatica_OX=6192_GN=D915_002305_PE=3_SV=1	A0A2H1CNP3	100	6.3e-69	269.2	81.9	100
maker-scaffold10x_1278_pilon-snap-gene-0.16-mRNA-1_transcript=maker-scaffold10x_1278_pilon-snap-gene-0.16-mRNA-1_gene=maker-scaffold10x_1278_pilon-snap-gene-0.16	A0A2H1CNS8|A0A2H1CNS8_FASHE_Immunoglobulin_V-set_domain_protein_OS=Fasciola_hepatica_OX=6192_GN=D915_04065_PE=4_SV=1	A0A2H1CNS8	87.4	0	1166.8	29.3	100
maker-scaffold10x_682_pilon-snap-gene-0.74-mRNA-1_transcript=maker-scaffold10x_682_pilon-snap-gene-0.74-mRNA-1_gene=maker-scaffold10x_682_pilon-snap-gene-0.74	A0A2H1CNU8|A0A2H1CNU8_FASHE_ERAP1_C_domain-containing_protein_OS=Fasciola_hepatica_OX=6192_GN=D915_03464_PE=4_SV=1	A0A2H1CNU8	96.6	1.6e-138	501.1	98.1	99.6
maker-scaffold10x_1_pilon-snap-gene-0.149-mRNA-1_transcript=maker-scaffold10x_1_pilon-snap-gene-0.149-mRNA-1_gene=maker-scaffold10x_1_pilon-snap-gene-0.149	A0A2H1CNY5|A0A2H1CNY5_FASHE_Zinc_finger,_C2H2_type_OS=Fasciola_hepatica_OX=6192_GN=D915_04219_PE=4_SV=1	A0A2H1CNY5	98.7	0	1867.4	97.7	98.4
maker-scaffold10x_1568_pilon-snap-gene-0.7-mRNA-1_transcript=maker-scaffold10x_1568_pilon-snap-gene-0.7-mRNA-1_gene=maker-scaffold10x_1568_pilon-snap-gene-0.7	A0A2H1CP30|A0A2H1CP30_FASHE_TGF_BETA_2_domain-containing_protein_OS=Fasciola_hepatica_OX=6192_GN=D915_002217_PE=3_SV=1	A0A2H1CP30	98.8	1.8e-243	850.5	100	100
augustus_masked-scaffold10x_1637_pilon-processed-gene-0.28-mRNA-1_transcript=augustus_masked-scaffold10x_1637_pilon-processed-gene-0.28-mRNA-1_gene=augustus_masked-scaffold10x_1637_pilon-processed-gene-0.28	A0A2H1CP38|A0A2H1CP38_FASHE_Tropomyosin_OS=Fasciola_hepatica_OX=6192_GN=D915_03306_PE=4_SV=1	A0A2H1CP38	100	1.6e-35	157.5	93.7	39.7
maker-scaffold10x_898_pilon-snap-gene-0.16-mRNA-1_transcript=maker-scaffold10x_898_pilon-snap-gene-0.16-mRNA-1_gene=maker-scaffold10x_898_pilon-snap-gene-0.16	A0A2H1CP48|A0A2H1CP48_FASHE_HECT-domain_protein_OS=Fasciola_hepatica_OX=6192_GN=D915_03316_PE=4_SV=1	A0A2H1CP48	100	1.6e-230	807.4	100	100
maker-scaffold10x_145_pilon-augustus-gene-2.264-mRNA-1_transcript=maker-scaffold10x_145_pilon-augustus-gene-2.264-mRNA-1_gene=maker-scaffold10x_145_pilon-augustus-gene-2.264	A0A2H1CP88|A0A2H1CP88_FASHE_Tetratricopeptide_repeat_protein_OS=Fasciola_hepatica_OX=6192_GN=D915_002109_PE=4_SV=1	A0A2H1CP88	100	0	1108.2	100	100
maker-scaffold10x_917_pilon-augustus-gene-0.14-mRNA-1_transcript=maker-scaffold10x_917_pilon-augustus-gene-0.14-mRNA-1_gene=maker-scaffold10x_917_pilon-augustus-gene-0.14	A0A2H1CP98|A0A2H1CP98_FASHE_Regulator_of_condensation_OS=Fasciola_hepatica_OX=6192_GN=D915_16190_PE=4_SV=1	A0A2H1CP98	99.9	0	1344.7	100	87.9
maker-scaffold10x_251_pilon-augustus-gene-0.3-mRNA-1_transcript=maker-scaffold10x_251_pilon-augustus-gene-0.3-mRNA-1_gene=maker-scaffold10x_251_pilon-augustus-gene-0.3	A0A2H1CPA2|A0A2H1CPA2_FASHE_40S_ribosomal_protein_S26_OS=Fasciola_hepatica_OX=6192_GN=D915_002096_PE=3_SV=1	A0A2H1CPA2	100	1.6e-58	234.2	100	100
maker-scaffold10x_254_pilon-snap-gene-0.26-mRNA-1_transcript=maker-scaffold10x_254_pilon-snap-gene-0.26-mRNA-1_gene=maker-scaffold10x_254_pilon-snap-gene-0.26	A0A2H1CPB2|A0A2H1CPB2_FASHE_Hsp20/alpha_crystallin_family_protein_OS=Fasciola_hepatica_OX=6192_GN=D915_002155_PE=3_SV=1	A0A2H1CPB2	100	5.4e-265	922.2	100	100
maker-scaffold10x_894_pilon-snap-gene-0.107-mRNA-1_transcript=maker-scaffold10x_894_pilon-snap-gene-0.107-mRNA-1_gene=maker-scaffold10x_894_pilon-snap-gene-0.107	A0A2H1CPB4|A0A2H1CPB4_FASHE_Alpha_amylase,_catalytic_domain_protein_OS=Fasciola_hepatica_OX=6192_GN=D915_03852_PE=4_SV=1	A0A2H1CPB4	82.4	7e-282	978.4	100	99.4
maker-scaffold10x_1335_pilon-snap-gene-0.65-mRNA-1_transcript=maker-scaffold10x_1335_pilon-snap-gene-0.65-mRNA-1_gene=maker-scaffold10x_1335_pilon-snap-gene-0.65	A0A2H1CPC6|A0A2H1CPC6_FASHE_DnaJ_domain_protein_OS=Fasciola_hepatica_OX=6192_GN=D915_002075_PE=4_SV=1	A0A2H1CPC6	100	8.1e-157	562.4	78.3	100
augustus_masked-scaffold10x_794_pilon-processed-gene-0.99-mRNA-1_transcript=augustus_masked-scaffold10x_794_pilon-processed-gene-0.99-mRNA-1_gene=augustus_masked-scaffold10x_794_pilon-processed-gene-0.99	A0A2H1CPD9|A0A2H1CPD9_FASHE_B-box_zinc_finger_OS=Fasciola_hepatica_OX=6192_GN=D915_002090_PE=4_SV=1	A0A2H1CPD9	99.1	3.2e-266	926.4	100	79.5
snap_masked-scaffold10x_1644_pilon-processed-gene-0.1-mRNA-1_transcript=snap_masked-scaffold10x_1644_pilon-processed-gene-0.1-mRNA-1_gene=snap_masked-scaffold10x_1644_pilon-processed-gene-0.1	A0A2H1CPF2|A0A2H1CPF2_FASHE_Carboxylesterase_OS=Fasciola_hepatica_OX=6192_GN=D915_001769_PE=4_SV=1	A0A2H1CPF2	100	0	1323.1	100	100
maker-scaffold10x_321_pilon-augustus-gene-0.28-mRNA-1_transcript=maker-scaffold10x_321_pilon-augustus-gene-0.28-mRNA-1_gene=maker-scaffold10x_321_pilon-augustus-gene-0.28	A0A2H1CPG3|A0A2H1CPG3_FASHE_WD_domain,_G-beta_repeat_protein_(Fragment)_OS=Fasciola_hepatica_OX=6192_GN=D915_03197_PE=4_SV=1	A0A2H1CPG3	83.8	3.4e-70	273.5	100	71.1
maker-scaffold10x_237_pilon-snap-gene-0.62-mRNA-1_transcript=maker-scaffold10x_237_pilon-snap-gene-0.62-mRNA-1_gene=maker-scaffold10x_237_pilon-snap-gene-0.62	A0A2H1CPH1|A0A2H1CPH1_FASHE_Solute_carrier_family_22_member_1_OS=Fasciola_hepatica_OX=6192_GN=D915_002171_PE=4_SV=1	A0A2H1CPH1	99.5	0	1245.3	50	99.2
maker-scaffold10x_25_pilon-snap-gene-0.26-mRNA-1_transcript=maker-scaffold10x_25_pilon-snap-gene-0.26-mRNA-1_gene=maker-scaffold10x_25_pilon-snap-gene-0.26	A0A2H1CPI9|A0A2H1CPI9_FASHE_Clathrin_light_chain_OS=Fasciola_hepatica_OX=6192_GN=D915_03782_PE=3_SV=1	A0A2H1CPI9	99.5	9.9e-119	435.3	92.4	100
snap_masked-scaffold10x_237_pilon-processed-gene-0.22-mRNA-1_transcript=snap_masked-scaffold10x_237_pilon-processed-gene-0.22-mRNA-1_gene=snap_masked-scaffold10x_237_pilon-processed-gene-0.22	A0A2H1CPJ4|A0A2H1CPJ4_FASHE_Transporter,_major_facilitator_family_protein_OS=Fasciola_hepatica_OX=6192_GN=D915_03171_PE=4_SV=1	A0A2H1CPJ4	99.1	0	1243.4	100	100
maker-scaffold10x_387_pilon-snap-gene-0.65-mRNA-1_transcript=maker-scaffold10x_387_pilon-snap-gene-0.65-mRNA-1_gene=maker-scaffold10x_387_pilon-snap-gene-0.65	A0A2H1CPK2|A0A2H1CPK2_FASHE_Cadherin_domain_protein_OS=Fasciola_hepatica_OX=6192_GN=D915_03140_PE=4_SV=1	A0A2H1CPK2	99	3.6e-218	768.1	28.7	95.5
maker-scaffold10x_966_pilon-snap-gene-0.82-mRNA-1_transcript=maker-scaffold10x_966_pilon-snap-gene-0.82-mRNA-1_gene=maker-scaffold10x_966_pilon-snap-gene-0.82	A0A2H1CPQ2|A0A2H1CPQ2_FASHE_Ras-GEF_domain-containing_protein_OS=Fasciola_hepatica_OX=6192_GN=D915_03077_PE=4_SV=1	A0A2H1CPQ2	89.9	4.2e-264	920.6	41.8	99.3
maker-scaffold10x_628_pilon-augustus-gene-0.28-mRNA-1_transcript=maker-scaffold10x_628_pilon-augustus-gene-0.28-mRNA-1_gene=maker-scaffold10x_628_pilon-augustus-gene-0.28	A0A2H1CPR0|A0A2H1CPR0_FASHE_16_kDa_calcium-binding_protein_OS=Fasciola_hepatica_OX=6192_GN=D915_002137_PE=4_SV=1	A0A2H1CPR0	100	1.5e-74	287.7	100	100
snap_masked-scaffold10x_602_pilon-processed-gene-0.52-mRNA-1_transcript=snap_masked-scaffold10x_602_pilon-processed-gene-0.52-mRNA-1_gene=snap_masked-scaffold10x_602_pilon-processed-gene-0.52	A0A2H1CPR2|A0A2H1CPR2_FASHE_7_transmembrane_receptor_OS=Fasciola_hepatica_OX=6192_GN=D915_001992_PE=4_SV=1	A0A2H1CPR2	99.7	5.5e-212	745.7	100	100
maker-scaffold10x_208_pilon-snap-gene-0.15-mRNA-1_transcript=maker-scaffold10x_208_pilon-snap-gene-0.15-mRNA-1_gene=maker-scaffold10x_208_pilon-snap-gene-0.15	A0A2H1CPR4|A0A2H1CPR4_FASHE_DWNN_domain_protein_(Fragment)_OS=Fasciola_hepatica_OX=6192_GN=D915_03695_PE=4_SV=1	A0A2H1CPR4	98.6	0	1709.9	98.7	100
snap_masked-scaffold10x_311_pilon-processed-gene-0.59-mRNA-1_transcript=snap_masked-scaffold10x_311_pilon-processed-gene-0.59-mRNA-1_gene=snap_masked-scaffold10x_311_pilon-processed-gene-0.59	A0A2H1CPV3|A0A2H1CPV3_FASHE_Helix-loop-helix_DNA-binding_domain_protein_OS=Fasciola_hepatica_OX=6192_GN=D915_03027_PE=4_SV=1	A0A2H1CPV3	92.3	1.9e-79	306.6	19.4	93.8
snap_masked-scaffold10x_1279_pilon-processed-gene-0.66-mRNA-1_transcript=snap_masked-scaffold10x_1279_pilon-processed-gene-0.66-mRNA-1_gene=snap_masked-scaffold10x_1279_pilon-processed-gene-0.66	A0A2H1CPW8|A0A2H1CPW8_FASHE_Zinc_finger,_C2H2_type_OS=Fasciola_hepatica_OX=6192_GN=D915_03003_PE=4_SV=1	A0A2H1CPW8	100	2.9e-137	497.3	100	100
maker-scaffold10x_311_pilon-snap-gene-0.43-mRNA-1_transcript=maker-scaffold10x_311_pilon-snap-gene-0.43-mRNA-1_gene=maker-scaffold10x_311_pilon-snap-gene-0.43	A0A2H1CPX5|A0A2H1CPX5_FASHE_DUF3421_domain-containing_protein_OS=Fasciola_hepatica_OX=6192_GN=D915_03028_PE=4_SV=1	A0A2H1CPX5	87	4.1e-90	340.5	62.9	98.4
snap_masked-scaffold10x_90_pilon-processed-gene-0.29-mRNA-1_transcript=snap_masked-scaffold10x_90_pilon-processed-gene-0.29-mRNA-1_gene=snap_masked-scaffold10x_90_pilon-processed-gene-0.29	A0A2H1CPZ8|A0A2H1CPZ8_FASHE_7_transmembrane_receptor_OS=Fasciola_hepatica_OX=6192_GN=D915_001914_PE=4_SV=1	A0A2H1CPZ8	99.8	0	1271.1	100	100
maker-scaffold10x_284_pilon-augustus-gene-0.132-mRNA-1_transcript=maker-scaffold10x_284_pilon-augustus-gene-0.132-mRNA-1_gene=maker-scaffold10x_284_pilon-augustus-gene-0.132	A0A2H1CQ25|A0A2H1CQ25_FASHE_EF_hand_OS=Fasciola_hepatica_OX=6192_GN=D915_001979_PE=4_SV=1	A0A2H1CQ25	100	3.3e-67	263.5	86	70.5
snap_masked-scaffold10x_37_pilon-processed-gene-0.80-mRNA-1_transcript=snap_masked-scaffold10x_37_pilon-processed-gene-0.80-mRNA-1_gene=snap_masked-scaffold10x_37_pilon-processed-gene-0.80	A0A2H1CQ60|A0A2H1CQ60_FASHE_MH2_domain_protein_OS=Fasciola_hepatica_OX=6192_GN=D915_02902_PE=4_SV=1	A0A2H1CQ60	100	2.5e-287	996.9	69.8	100
maker-scaffold10x_418_pilon-augustus-gene-0.122-mRNA-1_transcript=maker-scaffold10x_418_pilon-augustus-gene-0.122-mRNA-1_gene=maker-scaffold10x_418_pilon-augustus-gene-0.122	A0A2H1CQ64|A0A2H1CQ64_FASHE_WD_domain,_G-beta_repeat_protein_OS=Fasciola_hepatica_OX=6192_GN=D915_02897_PE=4_SV=1	A0A2H1CQ64	100	3.8e-74	286.6	91.2	16.5
maker-scaffold10x_703_pilon-snap-gene-0.86-mRNA-1_transcript=maker-scaffold10x_703_pilon-snap-gene-0.86-mRNA-1_gene=maker-scaffold10x_703_pilon-snap-gene-0.86	A0A2H1CQ78|A0A2H1CQ78_FASHE_DSS1/SEM1_family_protein_OS=Fasciola_hepatica_OX=6192_GN=D915_001656_PE=4_SV=1	A0A2H1CQ78	100	1.8e-47	197.2	100	100
maker-scaffold10x_1450_pilon-augustus-gene-0.48-mRNA-1_transcript=maker-scaffold10x_1450_pilon-augustus-gene-0.48-mRNA-1_gene=maker-scaffold10x_1450_pilon-augustus-gene-0.48	A0A2H1CQA1|A0A2H1CQA1_FASHE_RhoGAP_domain_protein_OS=Fasciola_hepatica_OX=6192_GN=D915_001999_PE=4_SV=1	A0A2H1CQA1	100	0	1253	100	100
maker-scaffold10x_75_pilon-snap-gene-0.119-mRNA-1_transcript=maker-scaffold10x_75_pilon-snap-gene-0.119-mRNA-1_gene=maker-scaffold10x_75_pilon-snap-gene-0.119	A0A2H1CQD4|A0A2H1CQD4_FASHE_Homeobox_domain_protein_OS=Fasciola_hepatica_OX=6192_GN=D915_02853_PE=4_SV=1	A0A2H1CQD4	95.7	8.8e-199	701.8	100	85.8
augustus_masked-scaffold10x_377_pilon-processed-gene-0.188-mRNA-1_transcript=augustus_masked-scaffold10x_377_pilon-processed-gene-0.188-mRNA-1_gene=augustus_masked-scaffold10x_377_pilon-processed-gene-0.188	A0A2H1CQG2|A0A2H1CQG2_FASHE_Myosin_tail_OS=Fasciola_hepatica_OX=6192_GN=D915_001853_PE=4_SV=1	A0A2H1CQG2	100	4.7e-226	793.5	100	90.4
maker-scaffold10x_744_pilon-snap-gene-0.80-mRNA-1_transcript=maker-scaffold10x_744_pilon-snap-gene-0.80-mRNA-1_gene=maker-scaffold10x_744_pilon-snap-gene-0.80	A0A2H1CQH0|A0A2H1CQH0_FASHE_B9_domain-containing_protein_2_OS=Fasciola_hepatica_OX=6192_GN=D915_001885_PE=4_SV=1	A0A2H1CQH0	99.4	7.4e-106	392.1	96.2	100
augustus_masked-scaffold10x_203_pilon-processed-gene-0.220-mRNA-1_transcript=augustus_masked-scaffold10x_203_pilon-processed-gene-0.220-mRNA-1_gene=augustus_masked-scaffold10x_203_pilon-processed-gene-0.220	A0A2H1CQJ4|A0A2H1CQJ4_FASHE_SH3_domain_protein_OS=Fasciola_hepatica_OX=6192_GN=D915_02793_PE=4_SV=1	A0A2H1CQJ4	97.3	5.1e-102	380.9	33.9	96.4
maker-scaffold10x_1866_pilon-snap-gene-0.29-mRNA-1_transcript=maker-scaffold10x_1866_pilon-snap-gene-0.29-mRNA-1_gene=maker-scaffold10x_1866_pilon-snap-gene-0.29	A0A2H1CQL3|A0A2H1CQL3_FASHE_SCP-like_protein_OS=Fasciola_hepatica_OX=6192_GN=D915_16188_PE=3_SV=1	A0A2H1CQL3	100	4.9e-38	166.4	67.6	14.7
maker-scaffold10x_291_pilon-augustus-gene-0.108-mRNA-1_transcript=maker-scaffold10x_291_pilon-augustus-gene-0.108-mRNA-1_gene=maker-scaffold10x_291_pilon-augustus-gene-0.108	A0A2H1CQL8|A0A2H1CQL8_FASHE_Peptidase,_M16_family_(Fragment)_OS=Fasciola_hepatica_OX=6192_GN=D915_02729_PE=4_SV=1	A0A2H1CQL8	83.4	3.4e-279	970.3	64.4	99.6
snap_masked-scaffold10x_1691_pilon-processed-gene-0.35-mRNA-1_transcript=snap_masked-scaffold10x_1691_pilon-processed-gene-0.35-mRNA-1_gene=snap_masked-scaffold10x_1691_pilon-processed-gene-0.35	A0A2H1CQM4|A0A2H1CQM4_FASHE_G_PROTEIN_RECEP_F1_2_domain-containing_protein_OS=Fasciola_hepatica_OX=6192_GN=D915_002269_PE=4_SV=1	A0A2H1CQM4	99.6	2.7e-264	919.8	100	100
maker-scaffold10x_291_pilon-snap-gene-0.71-mRNA-1_transcript=maker-scaffold10x_291_pilon-snap-gene-0.71-mRNA-1_gene=maker-scaffold10x_291_pilon-snap-gene-0.71	A0A2H1CQM9|A0A2H1CQM9_FASHE_FFD_and_TFG_box_motif_protein_OS=Fasciola_hepatica_OX=6192_GN=D915_001757_PE=4_SV=1	A0A2H1CQM9	99.3	5.6e-213	749.6	72	100
maker-scaffold10x_23_pilon-pred_gff_StringTie-gene-0.43-mRNA-1_transcript=maker-scaffold10x_23_pilon-pred_gff_StringTie-gene-0.43-mRNA-1_gene=maker-scaffold10x_23_pilon-pred_gff_StringTie-gene-0.43	A0A2H1CQP4|A0A2H1CQP4_FASHE_K+_channel_tetramerization_domain_protein_OS=Fasciola_hepatica_OX=6192_GN=D915_002281_PE=3_SV=1	A0A2H1CQP4	99.2	0	1557	91.5	100
maker-scaffold10x_1007_pilon-augustus-gene-0.79-mRNA-1_transcript=maker-scaffold10x_1007_pilon-augustus-gene-0.79-mRNA-1_gene=maker-scaffold10x_1007_pilon-augustus-gene-0.79	A0A2H1CQQ2|A0A2H1CQQ2_FASHE_V-type_proton_ATPase_subunit_G_(Fragment)_OS=Fasciola_hepatica_OX=6192_GN=D915_02752_PE=3_SV=1	A0A2H1CQQ2	100	2.8e-65	256.9	100	100
maker-scaffold10x_493_pilon-snap-gene-1.21-mRNA-1_transcript=maker-scaffold10x_493_pilon-snap-gene-1.21-mRNA-1_gene=maker-scaffold10x_493_pilon-snap-gene-1.21	A0A2H1CQR8|A0A2H1CQR8_FASHE_Homeobox_domain_protein_OS=Fasciola_hepatica_OX=6192_GN=D915_002283_PE=4_SV=1	A0A2H1CQR8	100	0	1629	100	100
maker-scaffold10x_184_pilon-augustus-gene-0.26-mRNA-1_transcript=maker-scaffold10x_184_pilon-augustus-gene-0.26-mRNA-1_gene=maker-scaffold10x_184_pilon-augustus-gene-0.26	A0A2H1CQS7|A0A2H1CQS7_FASHE_LIM_domain_protein_OS=Fasciola_hepatica_OX=6192_GN=D915_02671_PE=4_SV=1	A0A2H1CQS7	100	6.2e-33	149.4	48.5	100
maker-scaffold10x_1_pilon-augustus-gene-0.132-mRNA-1_transcript=maker-scaffold10x_1_pilon-augustus-gene-0.132-mRNA-1_gene=maker-scaffold10x_1_pilon-augustus-gene-0.132	A0A2H1CQS9|A0A2H1CQS9_FASHE_Flavin_reductase_OS=Fasciola_hepatica_OX=6192_GN=D915_001722_PE=4_SV=1	A0A2H1CQS9	99	1.5e-110	407.9	100	100
maker-scaffold10x_1437_pilon-snap-gene-0.41-mRNA-1_transcript=maker-scaffold10x_1437_pilon-snap-gene-0.41-mRNA-1_gene=maker-scaffold10x_1437_pilon-snap-gene-0.41	A0A2H1CQT0|A0A2H1CQT0_FASHE_ELAV_like_protein_2/3/4_OS=Fasciola_hepatica_OX=6192_GN=D915_002144_PE=4_SV=1	A0A2H1CQT0	99.6	0	1755.7	84.6	96.5
maker-scaffold10x_977_pilon-snap-gene-0.76-mRNA-1_transcript=maker-scaffold10x_977_pilon-snap-gene-0.76-mRNA-1_gene=maker-scaffold10x_977_pilon-snap-gene-0.76	A0A2H1CQU9|A0A2H1CQU9_FASHE_TM2_domain_protein_(Fragment)_OS=Fasciola_hepatica_OX=6192_GN=D915_02704_PE=4_SV=1	A0A2H1CQU9	100	7.2e-242	845.9	59.3	94.3
maker-scaffold10x_100_pilon-snap-gene-0.1-mRNA-1_transcript=maker-scaffold10x_100_pilon-snap-gene-0.1-mRNA-1_gene=maker-scaffold10x_100_pilon-snap-gene-0.1	A0A2H1CQW6|A0A2H1CQW6_FASHE_Lig_chan-Glu_bd_domain-containing_protein_OS=Fasciola_hepatica_OX=6192_GN=D915_02621_PE=4_SV=1	A0A2H1CQW6	97.3	8.2e-119	436.8	38.6	60.3
maker-scaffold10x_245_pilon-snap-gene-0.117-mRNA-1_transcript=maker-scaffold10x_245_pilon-snap-gene-0.117-mRNA-1_gene=maker-scaffold10x_245_pilon-snap-gene-0.117	A0A2H1CQY7|A0A2H1CQY7_FASHE_EF_hand_(Fragment)_OS=Fasciola_hepatica_OX=6192_GN=D915_02603_PE=4_SV=1	A0A2H1CQY7	83.2	0	1313.1	28.7	98
maker-scaffold10x_503_pilon-snap-gene-0.82-mRNA-1_transcript=maker-scaffold10x_503_pilon-snap-gene-0.82-mRNA-1_gene=maker-scaffold10x_503_pilon-snap-gene-0.82	A0A2H1CQZ0|A0A2H1CQZ0_FASHE_Plectin/S10_domain_protein_OS=Fasciola_hepatica_OX=6192_GN=D915_001745_PE=4_SV=1	A0A2H1CQZ0	100	1.4e-88	335.1	67.2	100
maker-scaffold10x_466_pilon-snap-gene-0.83-mRNA-1_transcript=maker-scaffold10x_466_pilon-snap-gene-0.83-mRNA-1_gene=maker-scaffold10x_466_pilon-snap-gene-0.83	A0A2H1CR03|A0A2H1CR03_FASHE_Core-2/I-Branching_enzyme_OS=Fasciola_hepatica_OX=6192_GN=D915_001967_PE=4_SV=1	A0A2H1CR03	99	1.5e-234	821.2	70.1	90.7
maker-scaffold10x_26_pilon-snap-gene-0.57-mRNA-1_transcript=maker-scaffold10x_26_pilon-snap-gene-0.57-mRNA-1_gene=maker-scaffold10x_26_pilon-snap-gene-0.57	A0A2H1CR29|A0A2H1CR29_FASHE_PDZ/DHR/GLGF_domain_protein_OS=Fasciola_hepatica_OX=6192_GN=D915_16178_PE=4_SV=1	A0A2H1CR29	100	6.1e-203	716.5	56.5	98.1
maker-scaffold10x_2630_pilon-snap-gene-0.9-mRNA-1_transcript=maker-scaffold10x_2630_pilon-snap-gene-0.9-mRNA-1_gene=maker-scaffold10x_2630_pilon-snap-gene-0.9	A0A2H1CR46|A0A2H1CR46_FASHE_CUB_domain_protein_OS=Fasciola_hepatica_OX=6192_GN=D915_02591_PE=4_SV=1	A0A2H1CR46	64.5	1.2e-50	209.1	63.8	74.1
maker-scaffold10x_998_pilon-pred_gff_StringTie-gene-0.18-mRNA-1_transcript=maker-scaffold10x_998_pilon-pred_gff_StringTie-gene-0.18-mRNA-1_gene=maker-scaffold10x_998_pilon-pred_gff_StringTie-gene-0.18	A0A2H1CR48|A0A2H1CR48_FASHE_Casein_kinase_I_epsilon_OS=Fasciola_hepatica_OX=6192_GN=D915_001641_PE=3_SV=1	A0A2H1CR48	100	1.4e-187	664.5	100	100
maker-scaffold10x_998_pilon-snap-gene-0.53-mRNA-1_transcript=maker-scaffold10x_998_pilon-snap-gene-0.53-mRNA-1_gene=maker-scaffold10x_998_pilon-snap-gene-0.53	A0A2H1CRA0|A0A2H1CRA0_FASHE_Zinc_finger,_C2H2_type_OS=Fasciola_hepatica_OX=6192_GN=D915_02533_PE=4_SV=1	A0A2H1CRA0	100	3e-161	577.8	49.1	92.7
maker-scaffold10x_973_pilon-snap-gene-0.58-mRNA-1_transcript=maker-scaffold10x_973_pilon-snap-gene-0.58-mRNA-1_gene=maker-scaffold10x_973_pilon-snap-gene-0.58	A0A2H1CRB5|A0A2H1CRB5_FASHE_Ribosomal_protein_L24e_OS=Fasciola_hepatica_OX=6192_GN=D915_02464_PE=4_SV=1	A0A2H1CRB5	100	3.9e-63	250	100	100
maker-scaffold10x_281_pilon-snap-gene-0.163-mRNA-1_transcript=maker-scaffold10x_281_pilon-snap-gene-0.163-mRNA-1_gene=maker-scaffold10x_281_pilon-snap-gene-0.163	A0A2H1CRH8|A0A2H1CRH8_FASHE_Protein_arginine_methyltransferase_NDUFAF7_OS=Fasciola_hepatica_OX=6192_GN=D915_02387_PE=3_SV=1	A0A2H1CRH8	97.8	2.6e-155	557	100	100
snap_masked-scaffold10x_602_pilon-processed-gene-0.51-mRNA-1_transcript=snap_masked-scaffold10x_602_pilon-processed-gene-0.51-mRNA-1_gene=snap_masked-scaffold10x_602_pilon-processed-gene-0.51	A0A2H1CRI2|A0A2H1CRI2_FASHE_7_transmembrane_receptor_OS=Fasciola_hepatica_OX=6192_GN=D915_001991_PE=4_SV=1	A0A2H1CRI2	99.5	3.1e-221	776.5	100	100
maker-scaffold10x_157_pilon-augustus-gene-0.97-mRNA-1_transcript=maker-scaffold10x_157_pilon-augustus-gene-0.97-mRNA-1_gene=maker-scaffold10x_157_pilon-augustus-gene-0.97	A0A2H1CRI9|A0A2H1CRI9_FASHE_FAD_dependent_oxidoreductase_OS=Fasciola_hepatica_OX=6192_GN=D915_02382_PE=4_SV=1	A0A2H1CRI9	100	1.6e-41	177.6	79.6	25.5
maker-scaffold10x_966_pilon-snap-gene-0.83-mRNA-1_transcript=maker-scaffold10x_966_pilon-snap-gene-0.83-mRNA-1_gene=maker-scaffold10x_966_pilon-snap-gene-0.83	A0A2H1CRJ4|A0A2H1CRJ4_FASHE_TRAUB_domain-containing_protein_OS=Fasciola_hepatica_OX=6192_GN=D915_03081_PE=4_SV=1	A0A2H1CRJ4	80.3	1.7e-46	196.1	31.7	85.8
snap_masked-scaffold10x_721_pilon-processed-gene-0.22-mRNA-1_transcript=snap_masked-scaffold10x_721_pilon-processed-gene-0.22-mRNA-1_gene=snap_masked-scaffold10x_721_pilon-processed-gene-0.22	A0A2H1CRP1|A0A2H1CRP1_FASHE_DnaK_family_protein_OS=Fasciola_hepatica_OX=6192_GN=D915_001564_PE=3_SV=1	A0A2H1CRP1	100	0	1229.2	100	100
maker-scaffold10x_1086_pilon-pred_gff_StringTie-gene-0.30-mRNA-1_transcript=maker-scaffold10x_1086_pilon-pred_gff_StringTie-gene-0.30-mRNA-1_gene=maker-scaffold10x_1086_pilon-pred_gff_StringTie-gene-0.30	A0A2H1CRP9|A0A2H1CRP9_FASHE_Cation_transporter_family_protein_OS=Fasciola_hepatica_OX=6192_GN=D915_001555_PE=3_SV=1	A0A2H1CRP9	100	0	1167.5	100	100
maker-scaffold10x_102_pilon-augustus-gene-0.81-mRNA-1_transcript=maker-scaffold10x_102_pilon-augustus-gene-0.81-mRNA-1_gene=maker-scaffold10x_102_pilon-augustus-gene-0.81	A0A2H1CRQ5|A0A2H1CRQ5_FASHE_EF-hand_domain-containing_protein_OS=Fasciola_hepatica_OX=6192_GN=D915_02354_PE=4_SV=1	A0A2H1CRQ5	95.9	2.1e-30	141.4	42.7	54.9
maker-scaffold10x_628_pilon-pred_gff_StringTie-gene-0.80-mRNA-1_transcript=maker-scaffold10x_628_pilon-pred_gff_StringTie-gene-0.80-mRNA-1_gene=maker-scaffold10x_628_pilon-pred_gff_StringTie-gene-0.80	A0A2H1CRS5|A0A2H1CRS5_FASHE_CBM21_domain-containing_protein_OS=Fasciola_hepatica_OX=6192_GN=D915_001360_PE=4_SV=1	A0A2H1CRS5	100	0	1284.2	100	100
maker-scaffold10x_441_pilon-snap-gene-0.30-mRNA-1_transcript=maker-scaffold10x_441_pilon-snap-gene-0.30-mRNA-1_gene=maker-scaffold10x_441_pilon-snap-gene-0.30	A0A2H1CRV7|A0A2H1CRV7_FASHE_Zinc_finger,_C2H2_type_OS=Fasciola_hepatica_OX=6192_GN=D915_03117_PE=4_SV=1	A0A2H1CRV7	95.3	0	3982.6	100	100
snap_masked-scaffold10x_371_pilon-processed-gene-0.23-mRNA-1_transcript=snap_masked-scaffold10x_371_pilon-processed-gene-0.23-mRNA-1_gene=snap_masked-scaffold10x_371_pilon-processed-gene-0.23	A0A2H1CRY0|A0A2H1CRY0_FASHE_CCAAT-binding_transcription_factor_subunit_B_OS=Fasciola_hepatica_OX=6192_GN=D915_02266_PE=4_SV=1	A0A2H1CRY0	99.4	1.4e-81	312	61.9	58.6
maker-scaffold10x_323_pilon-augustus-gene-0.75-mRNA-1_transcript=maker-scaffold10x_323_pilon-augustus-gene-0.75-mRNA-1_gene=maker-scaffold10x_323_pilon-augustus-gene-0.75	A0A2H1CRZ9|A0A2H1CRZ9_FASHE_Dynein_light_chain_OS=Fasciola_hepatica_OX=6192_GN=D915_001373_PE=3_SV=1	A0A2H1CRZ9	100	1.2e-43	184.5	100	100
maker-scaffold10x_343_pilon-snap-gene-0.58-mRNA-1_transcript=maker-scaffold10x_343_pilon-snap-gene-0.58-mRNA-1_gene=maker-scaffold10x_343_pilon-snap-gene-0.58	A0A2H1CS04|A0A2H1CS04_FASHE_TIGR00341_family_protein_OS=Fasciola_hepatica_OX=6192_GN=D915_16170_PE=4_SV=1	A0A2H1CS04	100	4.4e-162	580.5	55.7	83.9
maker-scaffold10x_1662_pilon-pred_gff_StringTie-gene-0.42-mRNA-1_transcript=maker-scaffold10x_1662_pilon-pred_gff_StringTie-gene-0.42-mRNA-1_gene=maker-scaffold10x_1662_pilon-pred_gff_StringTie-gene-0.42	A0A2H1CS22|A0A2H1CS22_FASHE_Solute_carrier_family_22_member_1_OS=Fasciola_hepatica_OX=6192_GN=D915_001433_PE=4_SV=1	A0A2H1CS22	100	0	1186	100	100
augustus_masked-scaffold10x_331_pilon-processed-gene-0.47-mRNA-1_transcript=augustus_masked-scaffold10x_331_pilon-processed-gene-0.47-mRNA-1_gene=augustus_masked-scaffold10x_331_pilon-processed-gene-0.47	A0A2H1CS34|A0A2H1CS34_FASHE_Eukaryotic_porin_OS=Fasciola_hepatica_OX=6192_GN=D915_001327_PE=4_SV=1	A0A2H1CS34	100	5.3e-184	652.5	100	100
augustus_masked-scaffold10x_173_pilon-processed-gene-0.60-mRNA-1_transcript=augustus_masked-scaffold10x_173_pilon-processed-gene-0.60-mRNA-1_gene=augustus_masked-scaffold10x_173_pilon-processed-gene-0.60	A0A2H1CS40|A0A2H1CS40_FASHE_THAP_domain_protein_OS=Fasciola_hepatica_OX=6192_GN=D915_16169_PE=4_SV=1	A0A2H1CS40	95.1	1.2e-253	884.8	78.2	73
maker-scaffold10x_253_pilon-snap-gene-0.138-mRNA-1_transcript=maker-scaffold10x_253_pilon-snap-gene-0.138-mRNA-1_gene=maker-scaffold10x_253_pilon-snap-gene-0.138	A0A2H1CS45|A0A2H1CS45_FASHE_Immunoglobulin_I-set_domain_protein_OS=Fasciola_hepatica_OX=6192_GN=D915_02154_PE=4_SV=1	A0A2H1CS45	100	4.8e-191	676	97.4	22.2
maker-scaffold10x_377_pilon-pred_gff_StringTie-gene-0.88-mRNA-1_transcript=maker-scaffold10x_377_pilon-pred_gff_StringTie-gene-0.88-mRNA-1_gene=maker-scaffold10x_377_pilon-pred_gff_StringTie-gene-0.88	A0A2H1CS47|A0A2H1CS47_FASHE_LSM_domain_protein_OS=Fasciola_hepatica_OX=6192_GN=D915_001849_PE=4_SV=1	A0A2H1CS47	98.3	1.7e-22	114.4	55.2	76.3
maker-scaffold10x_275_pilon-snap-gene-0.32-mRNA-1_transcript=maker-scaffold10x_275_pilon-snap-gene-0.32-mRNA-1_gene=maker-scaffold10x_275_pilon-snap-gene-0.32	A0A2H1CS63|A0A2H1CS63_FASHE_Kinesin_motor_domain_protein_OS=Fasciola_hepatica_OX=6192_GN=D915_001471_PE=3_SV=1	A0A2H1CS63	98.8	0	1956.4	100	100
augustus_masked-scaffold10x_1074_pilon-processed-gene-0.124-mRNA-1_transcript=augustus_masked-scaffold10x_1074_pilon-processed-gene-0.124-mRNA-1_gene=augustus_masked-scaffold10x_1074_pilon-processed-gene-0.124	A0A2H1CS82|A0A2H1CS82_FASHE_Sperm_flagellar_protein_1_OS=Fasciola_hepatica_OX=6192_GN=D915_001444_PE=4_SV=1	A0A2H1CS82	100	5.8e-141	509.2	100	100
maker-scaffold10x_2005_pilon-augustus-gene-0.57-mRNA-1_transcript=maker-scaffold10x_2005_pilon-augustus-gene-0.57-mRNA-1_gene=maker-scaffold10x_2005_pilon-augustus-gene-0.57	A0A2H1CS84|A0A2H1CS84_FASHE_Tubulin_beta_chain_OS=Fasciola_hepatica_OX=6192_GN=D915_001342_PE=3_SV=1	A0A2H1CS84	100	1.1e-259	904.4	100	100
maker-scaffold10x_142_pilon-snap-gene-0.68-mRNA-1_transcript=maker-scaffold10x_142_pilon-snap-gene-0.68-mRNA-1_gene=maker-scaffold10x_142_pilon-snap-gene-0.68	A0A2H1CS87|A0A2H1CS87_FASHE_PAN_domain_protein_OS=Fasciola_hepatica_OX=6192_GN=D915_02115_PE=4_SV=1	A0A2H1CS87	98.5	9e-110	405.6	79.1	70.7
maker-scaffold10x_149_pilon-snap-gene-0.94-mRNA-1_transcript=maker-scaffold10x_149_pilon-snap-gene-0.94-mRNA-1_gene=maker-scaffold10x_149_pilon-snap-gene-0.94	A0A2H1CS94|A0A2H1CS94_FASHE_Four_and_a_half_LIM_domains_protein_3_OS=Fasciola_hepatica_OX=6192_GN=D915_001319_PE=4_SV=1	A0A2H1CS94	100	2.5e-70	273.5	100	100
maker-scaffold10x_1546_pilon-snap-gene-0.20-mRNA-1_transcript=maker-scaffold10x_1546_pilon-snap-gene-0.20-mRNA-1_gene=maker-scaffold10x_1546_pilon-snap-gene-0.20	A0A2H1CSF0|A0A2H1CSF0_FASHE_Flavodoxin_OS=Fasciola_hepatica_OX=6192_GN=D915_001863_PE=4_SV=1	A0A2H1CSF0	100	0	1473	100	100
maker-scaffold10x_936_pilon-augustus-gene-0.94-mRNA-1_transcript=maker-scaffold10x_936_pilon-augustus-gene-0.94-mRNA-1_gene=maker-scaffold10x_936_pilon-augustus-gene-0.94	A0A2H1CSG2|A0A2H1CSG2_FASHE_ADP,ATP_carrier_protein_1_OS=Fasciola_hepatica_OX=6192_GN=D915_001296_PE=3_SV=1	A0A2H1CSG2	98.4	2.1e-26	127.5	56.3	20.3
maker-scaffold10x_441_pilon-pred_gff_StringTie-gene-0.47-mRNA-1_transcript=maker-scaffold10x_441_pilon-pred_gff_StringTie-gene-0.47-mRNA-1_gene=maker-scaffold10x_441_pilon-pred_gff_StringTie-gene-0.47	A0A2H1CSI2|A0A2H1CSI2_FASHE_Zinc_finger_protein_OS=Fasciola_hepatica_OX=6192_GN=D915_001252_PE=4_SV=1	A0A2H1CSI2	99.8	2e-246	860.5	100	100
maker-scaffold10x_703_pilon-snap-gene-0.88-mRNA-1_transcript=maker-scaffold10x_703_pilon-snap-gene-0.88-mRNA-1_gene=maker-scaffold10x_703_pilon-snap-gene-0.88	A0A2H1CSK1|A0A2H1CSK1_FASHE_Tubulin_delta_chain_OS=Fasciola_hepatica_OX=6192_GN=D915_001251_PE=3_SV=1	A0A2H1CSK1	97.5	3.3e-275	956.1	99.4	99
maker-scaffold10x_137_pilon-augustus-gene-0.4-mRNA-1_transcript=maker-scaffold10x_137_pilon-augustus-gene-0.4-mRNA-1_gene=maker-scaffold10x_137_pilon-augustus-gene-0.4	A0A2H1CSL2|A0A2H1CSL2_FASHE_EGF-like_domain_protein_OS=Fasciola_hepatica_OX=6192_GN=D915_02017_PE=4_SV=1	A0A2H1CSL2	94.9	3.1e-168	601.7	33.3	92.6
maker-scaffold10x_323_pilon-snap-gene-0.40-mRNA-1_transcript=maker-scaffold10x_323_pilon-snap-gene-0.40-mRNA-1_gene=maker-scaffold10x_323_pilon-snap-gene-0.40	A0A2H1CSN3|A0A2H1CSN3_FASHE_7_transmembrane_receptor_OS=Fasciola_hepatica_OX=6192_GN=D915_001255_PE=4_SV=1	A0A2H1CSN3	99.7	0	1227.6	100	100
maker-scaffold10x_2007_pilon-snap-gene-0.10-mRNA-1_transcript=maker-scaffold10x_2007_pilon-snap-gene-0.10-mRNA-1_gene=maker-scaffold10x_2007_pilon-snap-gene-0.10	A0A2H1CSN4|A0A2H1CSN4_FASHE_Leucine_Rich_repeat-containing_domain_protein_OS=Fasciola_hepatica_OX=6192_GN=D915_01951_PE=4_SV=1	A0A2H1CSN4	37.9	8.2e-07	63.9	23.2	82
maker-scaffold10x_56_pilon-snap-gene-0.51-mRNA-1_transcript=maker-scaffold10x_56_pilon-snap-gene-0.51-mRNA-1_gene=maker-scaffold10x_56_pilon-snap-gene-0.51	A0A2H1CSQ0|A0A2H1CSQ0_FASHE_EF_hand_OS=Fasciola_hepatica_OX=6192_GN=D915_001240_PE=4_SV=1	A0A2H1CSQ0	100	4e-226	792.7	100	100
maker-scaffold10x_56_pilon-snap-gene-0.52-mRNA-1_transcript=maker-scaffold10x_56_pilon-snap-gene-0.52-mRNA-1_gene=maker-scaffold10x_56_pilon-snap-gene-0.52	A0A2H1CSQ6|A0A2H1CSQ6_FASHE_RNAse_P_Rpr2/Rpp21_subunit_domain_protein_OS=Fasciola_hepatica_OX=6192_GN=D915_001241_PE=4_SV=1	A0A2H1CSQ6	97.9	3.4e-72	280.4	70.5	100
maker-scaffold10x_748_pilon-snap-gene-0.48-mRNA-1_transcript=maker-scaffold10x_748_pilon-snap-gene-0.48-mRNA-1_gene=maker-scaffold10x_748_pilon-snap-gene-0.48	A0A2H1CSR5|A0A2H1CSR5_FASHE_Acetyltransferase,_GNAT_family_OS=Fasciola_hepatica_OX=6192_GN=D915_01919_PE=4_SV=1	A0A2H1CSR5	96.4	3.1e-305	1056.2	91.9	100
maker-scaffold10x_22_pilon-snap-gene-0.121-mRNA-1_transcript=maker-scaffold10x_22_pilon-snap-gene-0.121-mRNA-1_gene=maker-scaffold10x_22_pilon-snap-gene-0.121	A0A2H1CSS7|A0A2H1CSS7_FASHE_Ribosomal_protein_S15_(Fragment)_OS=Fasciola_hepatica_OX=6192_GN=D915_02565_PE=3_SV=1	A0A2H1CSS7	100	7e-78	298.9	100	78.6
augustus_masked-scaffold10x_1427_pilon-processed-gene-0.12-mRNA-1_transcript=augustus_masked-scaffold10x_1427_pilon-processed-gene-0.12-mRNA-1_gene=augustus_masked-scaffold10x_1427_pilon-processed-gene-0.12	A0A2H1CSU5|A0A2H1CSU5_FASHE_C2_domain_protein_OS=Fasciola_hepatica_OX=6192_GN=D915_01913_PE=4_SV=1	A0A2H1CSU5	93.5	6.5e-177	630.2	46.9	94.8
maker-scaffold10x_2406_pilon-snap-gene-0.16-mRNA-1_transcript=maker-scaffold10x_2406_pilon-snap-gene-0.16-mRNA-1_gene=maker-scaffold10x_2406_pilon-snap-gene-0.16	A0A2H1CSW6|A0A2H1CSW6_FASHE_EF_hand_OS=Fasciola_hepatica_OX=6192_GN=D915_01883_PE=4_SV=1	A0A2H1CSW6	97.1	1.8e-31	143.7	100	37
maker-scaffold10x_494_pilon-snap-gene-0.34-mRNA-1_transcript=maker-scaffold10x_494_pilon-snap-gene-0.34-mRNA-1_gene=maker-scaffold10x_494_pilon-snap-gene-0.34	A0A2H1CSY2|A0A2H1CSY2_FASHE_Antistasin_family_protein_OS=Fasciola_hepatica_OX=6192_GN=D915_001308_PE=4_SV=1	A0A2H1CSY2	98.7	0	1259.2	100	100
maker-scaffold10x_1087_pilon-snap-gene-0.67-mRNA-1_transcript=maker-scaffold10x_1087_pilon-snap-gene-0.67-mRNA-1_gene=maker-scaffold10x_1087_pilon-snap-gene-0.67	A0A2H1CT09|A0A2H1CT09_FASHE_1-acyl-sn-glycerol-3-phosphate_acyltransferase_OS=Fasciola_hepatica_OX=6192_GN=D915_001140_PE=3_SV=1	A0A2H1CT09	100	9e-72	278.5	100	52.5
maker-scaffold10x_408_pilon-snap-gene-0.61-mRNA-1_transcript=maker-scaffold10x_408_pilon-snap-gene-0.61-mRNA-1_gene=maker-scaffold10x_408_pilon-snap-gene-0.61	A0A2H1CT09|A0A2H1CT09_FASHE_1-acyl-sn-glycerol-3-phosphate_acyltransferase_OS=Fasciola_hepatica_OX=6192_GN=D915_001140_PE=3_SV=1	A0A2H1CT09	81.8	5.8e-54	219.2	99.2	52.1
maker-scaffold10x_815_pilon-snap-gene-1.102-mRNA-1_transcript=maker-scaffold10x_815_pilon-snap-gene-1.102-mRNA-1_gene=maker-scaffold10x_815_pilon-snap-gene-1.102	A0A2H1CT29|A0A2H1CT29_FASHE_E3_ubiquitin-protein_ligase_ZNRF1/2_OS=Fasciola_hepatica_OX=6192_GN=D915_001283_PE=4_SV=1	A0A2H1CT29	100	1.4e-101	378.3	88.7	70.7
maker-scaffold10x_755_pilon-snap-gene-0.6-mRNA-1_transcript=maker-scaffold10x_755_pilon-snap-gene-0.6-mRNA-1_gene=maker-scaffold10x_755_pilon-snap-gene-0.6	A0A2H1CT43|A0A2H1CT43_FASHE_Vesicle_transport_protein_OS=Fasciola_hepatica_OX=6192_GN=D915_01783_PE=3_SV=1	A0A2H1CT43	82.2	3.1e-100	373.6	100	100
maker-scaffold10x_1444_pilon-pred_gff_StringTie-gene-0.24-mRNA-1_transcript=maker-scaffold10x_1444_pilon-pred_gff_StringTie-gene-0.24-mRNA-1_gene=maker-scaffold10x_1444_pilon-pred_gff_StringTie-gene-0.24	A0A2H1CT48|A0A2H1CT48_FASHE_Allatostatin-A_receptor_OS=Fasciola_hepatica_OX=6192_GN=D915_001280_PE=3_SV=1	A0A2H1CT48	99.3	2.4e-232	813.5	100	100
maker-scaffold10x_245_pilon-snap-gene-0.130-mRNA-1_transcript=maker-scaffold10x_245_pilon-snap-gene-0.130-mRNA-1_gene=maker-scaffold10x_245_pilon-snap-gene-0.130	A0A2H1CT65|A0A2H1CT65_FASHE_Dynein_light_chain_OS=Fasciola_hepatica_OX=6192_GN=D915_001800_PE=3_SV=1	A0A2H1CT65	100	2.8e-45	189.9	100	100
maker-scaffold10x_295_pilon-snap-gene-0.73-mRNA-1_transcript=maker-scaffold10x_295_pilon-snap-gene-0.73-mRNA-1_gene=maker-scaffold10x_295_pilon-snap-gene-0.73	A0A2H1CT75|A0A2H1CT75_FASHE_DEAD/DEAH_box_helicase_OS=Fasciola_hepatica_OX=6192_GN=D915_01764_PE=3_SV=1	A0A2H1CT75	100	1.5e-256	894	100	100
maker-scaffold10x_1829_pilon-snap-gene-0.27-mRNA-1_transcript=maker-scaffold10x_1829_pilon-snap-gene-0.27-mRNA-1_gene=maker-scaffold10x_1829_pilon-snap-gene-0.27	A0A2H1CT86|A0A2H1CT86_FASHE_Homeobox_domain_protein_OS=Fasciola_hepatica_OX=6192_GN=D915_001620_PE=4_SV=1	A0A2H1CT86	96	1e-214	755.4	72.8	97.6
maker-scaffold10x_4_pilon-pred_gff_StringTie-gene-0.116-mRNA-1_transcript=maker-scaffold10x_4_pilon-pred_gff_StringTie-gene-0.116-mRNA-1_gene=maker-scaffold10x_4_pilon-pred_gff_StringTie-gene-0.116	A0A2H1CT90|A0A2H1CT90_FASHE_Epididymal_sperm-binding_protein_1_OS=Fasciola_hepatica_OX=6192_GN=D915_001199_PE=4_SV=1	A0A2H1CT90	100	0	1595.5	100	100
augustus_masked-scaffold10x_213_pilon-processed-gene-0.4-mRNA-1_transcript=augustus_masked-scaffold10x_213_pilon-processed-gene-0.4-mRNA-1_gene=augustus_masked-scaffold10x_213_pilon-processed-gene-0.4	A0A2H1CT93|A0A2H1CT93_FASHE_Cyclin_F_box_OS=Fasciola_hepatica_OX=6192_GN=D915_001075_PE=4_SV=1	A0A2H1CT93	100	9.9e-172	611.7	100	59.8
snap_masked-scaffold10x_13_pilon-processed-gene-1.62-mRNA-1_transcript=snap_masked-scaffold10x_13_pilon-processed-gene-1.62-mRNA-1_gene=snap_masked-scaffold10x_13_pilon-processed-gene-1.62	A0A2H1CT95|A0A2H1CT95_FASHE_7_transmembrane_receptor_OS=Fasciola_hepatica_OX=6192_GN=D915_01727_PE=3_SV=1	A0A2H1CT95	100	2.3e-246	860.1	100	97.8
maker-scaffold10x_936_pilon-snap-gene-0.67-mRNA-1_transcript=maker-scaffold10x_936_pilon-snap-gene-0.67-mRNA-1_gene=maker-scaffold10x_936_pilon-snap-gene-0.67	A0A2H1CT97|A0A2H1CT97_FASHE_Immunoglobulin_domain_protein_OS=Fasciola_hepatica_OX=6192_GN=D915_01790_PE=4_SV=1	A0A2H1CT97	99.8	0	1257.3	42.5	90.9
maker-scaffold10x_53_pilon-snap-gene-0.71-mRNA-1_transcript=maker-scaffold10x_53_pilon-snap-gene-0.71-mRNA-1_gene=maker-scaffold10x_53_pilon-snap-gene-0.71	A0A2H1CTC5|A0A2H1CTC5_FASHE_UBIQUITIN_CONJUGAT_2_domain-containing_protein_OS=Fasciola_hepatica_OX=6192_GN=D915_01702_PE=4_SV=1	A0A2H1CTC5	100	4e-24	119.4	69.6	42
augustus_masked-scaffold10x_1175_pilon-processed-gene-0.36-mRNA-1_transcript=augustus_masked-scaffold10x_1175_pilon-processed-gene-0.36-mRNA-1_gene=augustus_masked-scaffold10x_1175_pilon-processed-gene-0.36	A0A2H1CTF9|A0A2H1CTF9_FASHE_RRM_domain-containing_protein_OS=Fasciola_hepatica_OX=6192_GN=D915_16172_PE=4_SV=1	A0A2H1CTF9	100	2.4e-143	517.7	72.6	33.3
maker-scaffold10x_73_pilon-pred_gff_StringTie-gene-0.55-mRNA-1_transcript=maker-scaffold10x_73_pilon-pred_gff_StringTie-gene-0.55-mRNA-1_gene=maker-scaffold10x_73_pilon-pred_gff_StringTie-gene-0.55	A0A2H1CTI8|A0A2H1CTI8_FASHE_DNA-directed_RNA_polymerase_subunit_OS=Fasciola_hepatica_OX=6192_GN=D915_01653_PE=3_SV=1	A0A2H1CTI8	100	1.7e-63	250.8	100	100
maker-scaffold10x_217_pilon-snap-gene-1.119-mRNA-1_transcript=maker-scaffold10x_217_pilon-snap-gene-1.119-mRNA-1_gene=maker-scaffold10x_217_pilon-snap-gene-1.119	A0A2H1CTI9|A0A2H1CTI9_FASHE_Fibronectin_type_III_domain_protein_OS=Fasciola_hepatica_OX=6192_GN=D915_01619_PE=4_SV=1	A0A2H1CTI9	92.7	3.5e-211	743.4	77.1	95.7
maker-scaffold10x_217_pilon-augustus-gene-1.8-mRNA-1_transcript=maker-scaffold10x_217_pilon-augustus-gene-1.8-mRNA-1_gene=maker-scaffold10x_217_pilon-augustus-gene-1.8	A0A2H1CTJ7|A0A2H1CTJ7_FASHE_Zinc_finger,_C2H2_type_OS=Fasciola_hepatica_OX=6192_GN=D915_001012_PE=4_SV=1	A0A2H1CTJ7	98.5	2.6e-80	307.4	99.5	27.1
maker-scaffold10x_345_pilon-pred_gff_StringTie-gene-1.35-mRNA-1_transcript=maker-scaffold10x_345_pilon-pred_gff_StringTie-gene-1.35-mRNA-1_gene=maker-scaffold10x_345_pilon-pred_gff_StringTie-gene-1.35	A0A2H1CTK2|A0A2H1CTK2_FASHE_Zinc_finger_protein_OS=Fasciola_hepatica_OX=6192_GN=D915_001136_PE=4_SV=1	A0A2H1CTK2	100	4.3e-156	559.7	100	98
maker-scaffold10x_217_pilon-snap-gene-1.120-mRNA-1_transcript=maker-scaffold10x_217_pilon-snap-gene-1.120-mRNA-1_gene=maker-scaffold10x_217_pilon-snap-gene-1.120	A0A2H1CTN4|A0A2H1CTN4_FASHE_Fibronectin_type_III_domain_protein_OS=Fasciola_hepatica_OX=6192_GN=D915_01620_PE=4_SV=1	A0A2H1CTN4	85.9	4.7e-119	436.8	78	86.4
maker-scaffold10x_345_pilon-snap-gene-1.102-mRNA-1_transcript=maker-scaffold10x_345_pilon-snap-gene-1.102-mRNA-1_gene=maker-scaffold10x_345_pilon-snap-gene-1.102	A0A2H1CTP0|A0A2H1CTP0_FASHE_Notch_domain_protein_OS=Fasciola_hepatica_OX=6192_GN=D915_01634_PE=4_SV=1	A0A2H1CTP0	99.6	7.9e-259	902.9	41.3	92.7
maker-scaffold10x_908_pilon-pred_gff_StringTie-gene-0.26-mRNA-1_transcript=maker-scaffold10x_908_pilon-pred_gff_StringTie-gene-0.26-mRNA-1_gene=maker-scaffold10x_908_pilon-pred_gff_StringTie-gene-0.26	A0A2H1CTR0|A0A2H1CTR0_FASHE_CREL1_OS=Fasciola_hepatica_OX=6192_GN=D915_001416_PE=4_SV=1	A0A2H1CTR0	99.7	4.8e-209	736.1	81.1	94.9
snap_masked-scaffold10x_223_pilon-processed-gene-0.10-mRNA-1_transcript=snap_masked-scaffold10x_223_pilon-processed-gene-0.10-mRNA-1_gene=snap_masked-scaffold10x_223_pilon-processed-gene-0.10	A0A2H1CTS3|A0A2H1CTS3_FASHE_Zinc_finger,_C3HC4_type_(Fragment)_OS=Fasciola_hepatica_OX=6192_GN=D915_01603_PE=4_SV=1	A0A2H1CTS3	100	0	1476.5	91.8	99.2
maker-scaffold10x_114_pilon-snap-gene-0.99-mRNA-1_transcript=maker-scaffold10x_114_pilon-snap-gene-0.99-mRNA-1_gene=maker-scaffold10x_114_pilon-snap-gene-0.99	A0A2H1CTT3|A0A2H1CTT3_FASHE_Transporter,_major_facilitator_family_protein_OS=Fasciola_hepatica_OX=6192_GN=D915_01575_PE=4_SV=1	A0A2H1CTT3	99.7	0	1304.3	86.4	98.8
maker-scaffold10x_330_pilon-snap-gene-0.86-mRNA-1_transcript=maker-scaffold10x_330_pilon-snap-gene-0.86-mRNA-1_gene=maker-scaffold10x_330_pilon-snap-gene-0.86	A0A2H1CTV4|A0A2H1CTV4_FASHE_Golgi_apparatus_membrane_protein_TVP23_homolog_OS=Fasciola_hepatica_OX=6192_GN=D915_000911_PE=3_SV=1	A0A2H1CTV4	100	9.8e-129	468.8	85.4	100
maker-scaffold10x_383_pilon-augustus-gene-1.28-mRNA-1_transcript=maker-scaffold10x_383_pilon-augustus-gene-1.28-mRNA-1_gene=maker-scaffold10x_383_pilon-augustus-gene-1.28	A0A2H1CTW0|A0A2H1CTW0_FASHE_1-phosphatidylinositol-4-phosphate_5-kinase_OS=Fasciola_hepatica_OX=6192_GN=D915_01540_PE=4_SV=1	A0A2H1CTW0	97	1.2e-163	585.1	80.1	98.3
maker-scaffold10x_179_pilon-augustus-gene-0.51-mRNA-1_transcript=maker-scaffold10x_179_pilon-augustus-gene-0.51-mRNA-1_gene=maker-scaffold10x_179_pilon-augustus-gene-0.51	A0A2H1CU00|A0A2H1CU00_FASHE_Ribonuclease_HI_OS=Fasciola_hepatica_OX=6192_GN=D915_02303_PE=4_SV=1	A0A2H1CU00	98.8	1.2e-42	181	100	59.9
maker-scaffold10x_1549_pilon-snap-gene-0.84-mRNA-1_transcript=maker-scaffold10x_1549_pilon-snap-gene-0.84-mRNA-1_gene=maker-scaffold10x_1549_pilon-snap-gene-0.84	A0A2H1CU16|A0A2H1CU16_FASHE_Actin_regulatory_protein_CAP-G_OS=Fasciola_hepatica_OX=6192_GN=D915_001001_PE=4_SV=1	A0A2H1CU16	100	4.7e-213	749.2	100	100
maker-scaffold10x_364_pilon-pred_gff_StringTie-gene-0.8-mRNA-1_transcript=maker-scaffold10x_364_pilon-pred_gff_StringTie-gene-0.8-mRNA-1_gene=maker-scaffold10x_364_pilon-pred_gff_StringTie-gene-0.8	A0A2H1CU26|A0A2H1CU26_FASHE_Noggin_OS=Fasciola_hepatica_OX=6192_GN=D915_01418_PE=4_SV=1	A0A2H1CU26	100	2.5e-267	929.9	100	100
maker-scaffold10x_756_pilon-snap-gene-0.49-mRNA-1_transcript=maker-scaffold10x_756_pilon-snap-gene-0.49-mRNA-1_gene=maker-scaffold10x_756_pilon-snap-gene-0.49	A0A2H1CU32|A0A2H1CU32_FASHE_Myb-like_DNA-binding_domain_protein_(Fragment)_OS=Fasciola_hepatica_OX=6192_GN=D915_02100_PE=4_SV=1	A0A2H1CU32	100	3.2e-73	284.3	53.9	84.2
augustus_masked-scaffold10x_364_pilon-processed-gene-0.25-mRNA-1_transcript=augustus_masked-scaffold10x_364_pilon-processed-gene-0.25-mRNA-1_gene=augustus_masked-scaffold10x_364_pilon-processed-gene-0.25	A0A2H1CU73|A0A2H1CU73_FASHE_Actin_OS=Fasciola_hepatica_OX=6192_GN=D915_000902_PE=3_SV=1	A0A2H1CU73	98.6	3e-165	590.1	100	78
maker-scaffold10x_1446_pilon-snap-gene-0.31-mRNA-1_transcript=maker-scaffold10x_1446_pilon-snap-gene-0.31-mRNA-1_gene=maker-scaffold10x_1446_pilon-snap-gene-0.31	A0A2H1CU94|A0A2H1CU94_FASHE_Fzo-like_region_OS=Fasciola_hepatica_OX=6192_GN=D915_02203_PE=3_SV=1	A0A2H1CU94	99.4	0	1360.1	100	100
maker-scaffold10x_1198_pilon-snap-gene-0.55-mRNA-1_transcript=maker-scaffold10x_1198_pilon-snap-gene-0.55-mRNA-1_gene=maker-scaffold10x_1198_pilon-snap-gene-0.55	A0A2H1CUD0|A0A2H1CUD0_FASHE_Palmitoyltransferase_OS=Fasciola_hepatica_OX=6192_GN=D915_000846_PE=3_SV=1	A0A2H1CUD0	100	4.1e-176	626.3	100	100
maker-scaffold10x_263_pilon-snap-gene-0.12-mRNA-1_transcript=maker-scaffold10x_263_pilon-snap-gene-0.12-mRNA-1_gene=maker-scaffold10x_263_pilon-snap-gene-0.12	A0A2H1CUD7|A0A2H1CUD7_FASHE_PKD_domain_protein_OS=Fasciola_hepatica_OX=6192_GN=D915_01344_PE=4_SV=1	A0A2H1CUD7	98.6	5.8e-117	430.6	39.3	17.1
maker-scaffold10x_1106_pilon-snap-gene-0.1-mRNA-1_transcript=maker-scaffold10x_1106_pilon-snap-gene-0.1-mRNA-1_gene=maker-scaffold10x_1106_pilon-snap-gene-0.1	A0A2H1CUE0|A0A2H1CUE0_FASHE_Ribosomal_protein_S17P_OS=Fasciola_hepatica_OX=6192_GN=D915_01297_PE=3_SV=1	A0A2H1CUE0	100	9.8e-77	295	100	100
maker-scaffold10x_1106_pilon-snap-gene-0.0-mRNA-1_transcript=maker-scaffold10x_1106_pilon-snap-gene-0.0-mRNA-1_gene=maker-scaffold10x_1106_pilon-snap-gene-0.0	A0A2H1CUE8|A0A2H1CUE8_FASHE_Tetratricopeptide_repeat_protein_(Fragment)_OS=Fasciola_hepatica_OX=6192_GN=D915_01294_PE=4_SV=1	A0A2H1CUE8	98.9	1.6e-99	374	12.7	79.6
maker-scaffold10x_292_pilon-snap-gene-0.14-mRNA-1_transcript=maker-scaffold10x_292_pilon-snap-gene-0.14-mRNA-1_gene=maker-scaffold10x_292_pilon-snap-gene-0.14	A0A2H1CUG1|A0A2H1CUG1_FASHE_40S_ribosomal_protein_S3a_OS=Fasciola_hepatica_OX=6192_GN=D915_01300_PE=3_SV=1	A0A2H1CUG1	99.6	1.5e-141	511.1	100	100
maker-scaffold10x_22_pilon-snap-gene-0.124-mRNA-1_transcript=maker-scaffold10x_22_pilon-snap-gene-0.124-mRNA-1_gene=maker-scaffold10x_22_pilon-snap-gene-0.124	A0A2H1CUH0|A0A2H1CUH0_FASHE_Zinc_finger,_C2H2_type_OS=Fasciola_hepatica_OX=6192_GN=D915_01267_PE=4_SV=1	A0A2H1CUH0	100	7e-155	557	36.9	88.3
maker-scaffold10x_22_pilon-snap-gene-0.109-mRNA-1_transcript=maker-scaffold10x_22_pilon-snap-gene-0.109-mRNA-1_gene=maker-scaffold10x_22_pilon-snap-gene-0.109	A0A2H1CUI2|A0A2H1CUI2_FASHE_Ubiquitin_fusion_degradation_protein_UFD1_(Fragment)_OS=Fasciola_hepatica_OX=6192_GN=D915_01265_PE=4_SV=1	A0A2H1CUI2	99.4	2e-99	370.9	85.4	84.6
maker-scaffold10x_7_pilon-snap-gene-0.34-mRNA-1_transcript=maker-scaffold10x_7_pilon-snap-gene-0.34-mRNA-1_gene=maker-scaffold10x_7_pilon-snap-gene-0.34	A0A2H1CUK6|A0A2H1CUK6_FASHE_Glucose-regulated_OS=Fasciola_hepatica_OX=6192_GN=D915_000941_PE=3_SV=1	A0A2H1CUK6	99.3	0	1205.3	97.9	100
maker-scaffold10x_22_pilon-snap-gene-0.111-mRNA-1_transcript=maker-scaffold10x_22_pilon-snap-gene-0.111-mRNA-1_gene=maker-scaffold10x_22_pilon-snap-gene-0.111	A0A2H1CUK7|A0A2H1CUK7_FASHE_EF_hand_OS=Fasciola_hepatica_OX=6192_GN=D915_000840_PE=4_SV=1	A0A2H1CUK7	98.7	6.9e-76	292.4	98.7	99.4
maker-scaffold10x_279_pilon-snap-gene-0.19-mRNA-1_transcript=maker-scaffold10x_279_pilon-snap-gene-0.19-mRNA-1_gene=maker-scaffold10x_279_pilon-snap-gene-0.19	A0A2H1CUL2|A0A2H1CUL2_FASHE_Ribosomal_protein_L11_OS=Fasciola_hepatica_OX=6192_GN=D915_000853_PE=3_SV=1	A0A2H1CUL2	100	1.3e-97	364.8	100	100
maker-scaffold10x_851_pilon-snap-gene-0.29-mRNA-1_transcript=maker-scaffold10x_851_pilon-snap-gene-0.29-mRNA-1_gene=maker-scaffold10x_851_pilon-snap-gene-0.29	A0A2H1CUU6|A0A2H1CUU6_FASHE_Immunoglobulin_domain_protein_OS=Fasciola_hepatica_OX=6192_GN=D915_01170_PE=4_SV=1	A0A2H1CUU6	99.6	0	2741.1	77.3	98.8
maker-scaffold10x_343_pilon-snap-gene-0.60-mRNA-1_transcript=maker-scaffold10x_343_pilon-snap-gene-0.60-mRNA-1_gene=maker-scaffold10x_343_pilon-snap-gene-0.60	A0A2H1CUU9|A0A2H1CUU9_FASHE_Ribosomal_protein_S19a_isoform_C_OS=Fasciola_hepatica_OX=6192_GN=D915_000829_PE=4_SV=1	A0A2H1CUU9	100	1.5e-71	277.7	100	100
augustus_masked-scaffold10x_267_pilon-processed-gene-0.68-mRNA-1_transcript=augustus_masked-scaffold10x_267_pilon-processed-gene-0.68-mRNA-1_gene=augustus_masked-scaffold10x_267_pilon-processed-gene-0.68	A0A2H1CUX3|A0A2H1CUX3_FASHE_Heat_shock_70_kDa_protein_cognate_OS=Fasciola_hepatica_OX=6192_GN=D915_000782_PE=3_SV=1	A0A2H1CUX3	100	0	1262.7	100	100
maker-scaffold10x_1279_pilon-snap-gene-0.51-mRNA-1_transcript=maker-scaffold10x_1279_pilon-snap-gene-0.51-mRNA-1_gene=maker-scaffold10x_1279_pilon-snap-gene-0.51	A0A2H1CUX4|A0A2H1CUX4_FASHE_Tetraspanin_family_protein_OS=Fasciola_hepatica_OX=6192_GN=D915_000797_PE=3_SV=1	A0A2H1CUX4	32.2	5.1e-35	157.5	93.4	95.7
maker-scaffold10x_1279_pilon-snap-gene-0.58-mRNA-1_transcript=maker-scaffold10x_1279_pilon-snap-gene-0.58-mRNA-1_gene=maker-scaffold10x_1279_pilon-snap-gene-0.58	A0A2H1CUX4|A0A2H1CUX4_FASHE_Tetraspanin_family_protein_OS=Fasciola_hepatica_OX=6192_GN=D915_000797_PE=3_SV=1	A0A2H1CUX4	99.7	2.1e-158	567.4	100	100
maker-scaffold10x_295_pilon-augustus-gene-0.24-mRNA-1_transcript=maker-scaffold10x_295_pilon-augustus-gene-0.24-mRNA-1_gene=maker-scaffold10x_295_pilon-augustus-gene-0.24	A0A2H1CUX9|A0A2H1CUX9_FASHE_Putative_D-tyrosyl-tRNA(Tyr)_deacylase_OS=Fasciola_hepatica_OX=6192_GN=D915_01763_PE=4_SV=1	A0A2H1CUX9	100	2.8e-36	159.8	92.7	34.7
maker-scaffold10x_1213_pilon-augustus-gene-0.1-mRNA-1_transcript=maker-scaffold10x_1213_pilon-augustus-gene-0.1-mRNA-1_gene=maker-scaffold10x_1213_pilon-augustus-gene-0.1	A0A2H1CUZ6|A0A2H1CUZ6_FASHE_Tetraspanin_family_protein_OS=Fasciola_hepatica_OX=6192_GN=D915_01092_PE=4_SV=1	A0A2H1CUZ6	52.7	1e-37	165.6	60.1	93.9
maker-scaffold10x_713_pilon-augustus-gene-0.37-mRNA-1_transcript=maker-scaffold10x_713_pilon-augustus-gene-0.37-mRNA-1_gene=maker-scaffold10x_713_pilon-augustus-gene-0.37	A0A2H1CV04|A0A2H1CV04_FASHE_GST_C-terminal_domain-containing_protein_OS=Fasciola_hepatica_OX=6192_GN=D915_01058_PE=4_SV=1	A0A2H1CV04	100	1e-146	528.5	91.9	86.5
maker-scaffold10x_1427_pilon-pred_gff_StringTie-gene-0.23-mRNA-1_transcript=maker-scaffold10x_1427_pilon-pred_gff_StringTie-gene-0.23-mRNA-1_gene=maker-scaffold10x_1427_pilon-pred_gff_StringTie-gene-0.23	A0A2H1CV16|A0A2H1CV16_FASHE_DnaJ_domain_protein_OS=Fasciola_hepatica_OX=6192_GN=D915_001303_PE=4_SV=1	A0A2H1CV16	100	3.3e-148	533.5	100	100
maker-scaffold10x_1549_pilon-pred_gff_StringTie-gene-0.41-mRNA-1_transcript=maker-scaffold10x_1549_pilon-pred_gff_StringTie-gene-0.41-mRNA-1_gene=maker-scaffold10x_1549_pilon-pred_gff_StringTie-gene-0.41	A0A2H1CV23|A0A2H1CV23_FASHE_7_transmembrane_receptor_OS=Fasciola_hepatica_OX=6192_GN=D915_01089_PE=4_SV=1	A0A2H1CV23	100	2.4e-290	1006.5	96.2	100
maker-scaffold10x_742_pilon-snap-gene-0.81-mRNA-1_transcript=maker-scaffold10x_742_pilon-snap-gene-0.81-mRNA-1_gene=maker-scaffold10x_742_pilon-snap-gene-0.81	A0A2H1CV34|A0A2H1CV34_FASHE_Transforming_acidic_coiled-coil-containing_protein_(Fragment)_OS=Fasciola_hepatica_OX=6192_GN=D915_01040_PE=4_SV=1	A0A2H1CV34	100	8.3e-108	399.8	51.1	100
snap_masked-scaffold10x_567_pilon-processed-gene-0.38-mRNA-1_transcript=snap_masked-scaffold10x_567_pilon-processed-gene-0.38-mRNA-1_gene=snap_masked-scaffold10x_567_pilon-processed-gene-0.38	A0A2H1CV87|A0A2H1CV87_FASHE_Cadherin_domain_protein_OS=Fasciola_hepatica_OX=6192_GN=D915_00962_PE=4_SV=1	A0A2H1CV87	100	0	2630.9	100	100
snap_masked-scaffold10x_229_pilon-processed-gene-0.15-mRNA-1_transcript=snap_masked-scaffold10x_229_pilon-processed-gene-0.15-mRNA-1_gene=snap_masked-scaffold10x_229_pilon-processed-gene-0.15	A0A2H1CV95|A0A2H1CV95_FASHE_Mannosyltransferase_OS=Fasciola_hepatica_OX=6192_GN=D915_000678_PE=3_SV=1	A0A2H1CV95	96.1	7.8e-291	1009.2	44.9	87.7
snap_masked-scaffold10x_209_pilon-processed-gene-0.4-mRNA-1_transcript=snap_masked-scaffold10x_209_pilon-processed-gene-0.4-mRNA-1_gene=snap_masked-scaffold10x_209_pilon-processed-gene-0.4	A0A2H1CVA1|A0A2H1CVA1_FASHE_Proton-coupled_folate_transporter_OS=Fasciola_hepatica_OX=6192_GN=D915_000668_PE=4_SV=1	A0A2H1CVA1	99.8	1e-264	921.4	87.8	90.2
maker-scaffold10x_239_pilon-snap-gene-0.3-mRNA-1_transcript=maker-scaffold10x_239_pilon-snap-gene-0.3-mRNA-1_gene=maker-scaffold10x_239_pilon-snap-gene-0.3	A0A2H1CVA3|A0A2H1CVA3_FASHE_Apoptosis_regulator_protein,_Bcl-2_family_OS=Fasciola_hepatica_OX=6192_GN=D915_001050_PE=4_SV=1	A0A2H1CVA3	93.8	0	1447.2	100	100
maker-scaffold10x_209_pilon-snap-gene-0.28-mRNA-1_transcript=maker-scaffold10x_209_pilon-snap-gene-0.28-mRNA-1_gene=maker-scaffold10x_209_pilon-snap-gene-0.28	A0A2H1CVB0|A0A2H1CVB0_FASHE_Armadillo/beta-catenin-like_repeat_protein_OS=Fasciola_hepatica_OX=6192_GN=D915_000672_PE=4_SV=1	A0A2H1CVB0	100	5.2e-149	537	100	100
maker-scaffold10x_749_pilon-snap-gene-0.139-mRNA-1_transcript=maker-scaffold10x_749_pilon-snap-gene-0.139-mRNA-1_gene=maker-scaffold10x_749_pilon-snap-gene-0.139	A0A2H1CVE2|A0A2H1CVE2_FASHE_Survival_of_motor_neuron_splicing_factor_OS=Fasciola_hepatica_OX=6192_GN=D915_000625_PE=4_SV=1	A0A2H1CVE2	100	1.8e-111	411	100	100
maker-scaffold10x_2132_pilon-snap-gene-0.5-mRNA-1_transcript=maker-scaffold10x_2132_pilon-snap-gene-0.5-mRNA-1_gene=maker-scaffold10x_2132_pilon-snap-gene-0.5	A0A2H1CVE8|A0A2H1CVE8_FASHE_ADP-ribosylation_factor_family_protein_OS=Fasciola_hepatica_OX=6192_GN=D915_00960_PE=3_SV=1	A0A2H1CVE8	100	2.5e-53	216.9	100	93.8
maker-scaffold10x_2132_pilon-snap-gene-0.7-mRNA-1_transcript=maker-scaffold10x_2132_pilon-snap-gene-0.7-mRNA-1_gene=maker-scaffold10x_2132_pilon-snap-gene-0.7	A0A2H1CVE8|A0A2H1CVE8_FASHE_ADP-ribosylation_factor_family_protein_OS=Fasciola_hepatica_OX=6192_GN=D915_00960_PE=3_SV=1	A0A2H1CVE8	100	2.3e-57	230.3	100	100
maker-scaffold10x_295_pilon-pred_gff_StringTie-gene-0.54-mRNA-1_transcript=maker-scaffold10x_295_pilon-pred_gff_StringTie-gene-0.54-mRNA-1_gene=maker-scaffold10x_295_pilon-pred_gff_StringTie-gene-0.54	A0A2H1CVG1|A0A2H1CVG1_FASHE_Alpha-1,3-glucosyltransferase_OS=Fasciola_hepatica_OX=6192_GN=D915_001151_PE=3_SV=1	A0A2H1CVG1	99.6	2.4e-284	986.5	100	100
maker-scaffold10x_383_pilon-augustus-gene-1.38-mRNA-1_transcript=maker-scaffold10x_383_pilon-augustus-gene-1.38-mRNA-1_gene=maker-scaffold10x_383_pilon-augustus-gene-1.38	A0A2H1CVI5|A0A2H1CVI5_FASHE_Putative_Tumor_necrosis_factor_induced_protein_OS=Fasciola_hepatica_OX=6192_GN=D915_001095_PE=4_SV=1	A0A2H1CVI5	100	1.1e-119	438.3	100	100
maker-scaffold10x_2638_pilon-snap-gene-0.33-mRNA-1_transcript=maker-scaffold10x_2638_pilon-snap-gene-0.33-mRNA-1_gene=maker-scaffold10x_2638_pilon-snap-gene-0.33	A0A2H1CVJ1|A0A2H1CVJ1_FASHE_Pol_polyprotein_OS=Fasciola_hepatica_OX=6192_GN=D915_000594_PE=4_SV=1	A0A2H1CVJ1	99.8	3.7e-244	852.8	95	100
maker-scaffold10x_281_pilon-snap-gene-0.187-mRNA-1_transcript=maker-scaffold10x_281_pilon-snap-gene-0.187-mRNA-1_gene=maker-scaffold10x_281_pilon-snap-gene-0.187	A0A2H1CVJ3|A0A2H1CVJ3_FASHE_Fork_head_domain_protein_OS=Fasciola_hepatica_OX=6192_GN=D915_001162_PE=4_SV=1	A0A2H1CVJ3	98.7	0	2070.8	62.4	99.5
maker-scaffold10x_919_pilon-snap-gene-0.108-mRNA-1_transcript=maker-scaffold10x_919_pilon-snap-gene-0.108-mRNA-1_gene=maker-scaffold10x_919_pilon-snap-gene-0.108	A0A2H1CVJ4|A0A2H1CVJ4_FASHE_RRM_domain-containing_protein_OS=Fasciola_hepatica_OX=6192_GN=D915_00843_PE=4_SV=1	A0A2H1CVJ4	99.7	1.8e-139	504.6	98.7	97.8
maker-scaffold10x_166_pilon-pred_gff_StringTie-gene-0.156-mRNA-1_transcript=maker-scaffold10x_166_pilon-pred_gff_StringTie-gene-0.156-mRNA-1_gene=maker-scaffold10x_166_pilon-pred_gff_StringTie-gene-0.156	A0A2H1CVM6|A0A2H1CVM6_FASHE_7_transmembrane_receptor_OS=Fasciola_hepatica_OX=6192_GN=D915_000580_PE=3_SV=1	A0A2H1CVM6	99.9	0	1888.2	100	100
maker-scaffold10x_342_pilon-augustus-gene-0.181-mRNA-1_transcript=maker-scaffold10x_342_pilon-augustus-gene-0.181-mRNA-1_gene=maker-scaffold10x_342_pilon-augustus-gene-0.181	A0A2H1CVP6|A0A2H1CVP6_FASHE_EF_hand_OS=Fasciola_hepatica_OX=6192_GN=D915_000537_PE=4_SV=1	A0A2H1CVP6	100	1.6e-32	147.1	100	100
maker-scaffold10x_387_pilon-snap-gene-0.64-mRNA-1_transcript=maker-scaffold10x_387_pilon-snap-gene-0.64-mRNA-1_gene=maker-scaffold10x_387_pilon-snap-gene-0.64	A0A2H1CVR1|A0A2H1CVR1_FASHE_Cofilin/tropomyosin-type_actin-binding_protein_OS=Fasciola_hepatica_OX=6192_GN=D915_00759_PE=3_SV=1	A0A2H1CVR1	100	1.1e-69	271.6	100	100
maker-scaffold10x_342_pilon-augustus-gene-0.164-mRNA-1_transcript=maker-scaffold10x_342_pilon-augustus-gene-0.164-mRNA-1_gene=maker-scaffold10x_342_pilon-augustus-gene-0.164	A0A2H1CVV7|A0A2H1CVV7_FASHE_EF_hand_OS=Fasciola_hepatica_OX=6192_GN=D915_000540_PE=4_SV=1	A0A2H1CVV7	97.1	7.5e-27	128.3	100	100
augustus_masked-scaffold10x_1006_pilon-processed-gene-0.61-mRNA-1_transcript=augustus_masked-scaffold10x_1006_pilon-processed-gene-0.61-mRNA-1_gene=augustus_masked-scaffold10x_1006_pilon-processed-gene-0.61	A0A2H1CVW1|A0A2H1CVW1_FASHE_FERM_central_domain_OS=Fasciola_hepatica_OX=6192_GN=D915_000524_PE=4_SV=1	A0A2H1CVW1	99.7	0	1573.1	100	89.4
maker-scaffold10x_387_pilon-augustus-gene-0.62-mRNA-1_transcript=maker-scaffold10x_387_pilon-augustus-gene-0.62-mRNA-1_gene=maker-scaffold10x_387_pilon-augustus-gene-0.62	A0A2H1CVX5|A0A2H1CVX5_FASHE_60S_ribosomal_protein_L13_OS=Fasciola_hepatica_OX=6192_GN=D915_000500_PE=3_SV=1	A0A2H1CVX5	100	2.6e-107	397.1	100	100
maker-scaffold10x_730_pilon-pred_gff_StringTie-gene-0.162-mRNA-1_transcript=maker-scaffold10x_730_pilon-pred_gff_StringTie-gene-0.162-mRNA-1_gene=maker-scaffold10x_730_pilon-pred_gff_StringTie-gene-0.162	A0A2H1CVZ6|A0A2H1CVZ6_FASHE_Zinc_finger_protein_OS=Fasciola_hepatica_OX=6192_GN=D915_000559_PE=4_SV=1	A0A2H1CVZ6	100	2.4e-198	700.7	100	100
maker-scaffold10x_381_pilon-snap-gene-0.30-mRNA-1_transcript=maker-scaffold10x_381_pilon-snap-gene-0.30-mRNA-1_gene=maker-scaffold10x_381_pilon-snap-gene-0.30	A0A2H1CW00|A0A2H1CW00_FASHE_SPFH/Band_7/PHB_domain_protein_OS=Fasciola_hepatica_OX=6192_GN=D915_000462_PE=4_SV=1	A0A2H1CW00	94.6	1.9e-162	580.9	100	100
maker-scaffold10x_355_pilon-augustus-gene-0.62-mRNA-1_transcript=maker-scaffold10x_355_pilon-augustus-gene-0.62-mRNA-1_gene=maker-scaffold10x_355_pilon-augustus-gene-0.62	A0A2H1CW04|A0A2H1CW04_FASHE_Dynein_light_chain_OS=Fasciola_hepatica_OX=6192_GN=D915_00729_PE=3_SV=1	A0A2H1CW04	100	6.6e-44	185.3	100	63.3
maker-scaffold10x_119_pilon-snap-gene-0.0-mRNA-1_transcript=maker-scaffold10x_119_pilon-snap-gene-0.0-mRNA-1_gene=maker-scaffold10x_119_pilon-snap-gene-0.0	A0A2H1CW05|A0A2H1CW05_FASHE_Leptin_receptor_overlapping_transcript_OS=Fasciola_hepatica_OX=6192_GN=D915_000492_PE=4_SV=1	A0A2H1CW05	99.2	6e-59	235.7	100	100
snap_masked-scaffold10x_730_pilon-processed-gene-0.107-mRNA-1_transcript=snap_masked-scaffold10x_730_pilon-processed-gene-0.107-mRNA-1_gene=snap_masked-scaffold10x_730_pilon-processed-gene-0.107	A0A2H1CW15|A0A2H1CW15_FASHE_Zinc_finger_protein_OS=Fasciola_hepatica_OX=6192_GN=D915_000558_PE=4_SV=1	A0A2H1CW15	99.5	2.3e-198	700.7	100	100
maker-scaffold10x_964_pilon-augustus-gene-0.1-mRNA-1_transcript=maker-scaffold10x_964_pilon-augustus-gene-0.1-mRNA-1_gene=maker-scaffold10x_964_pilon-augustus-gene-0.1	A0A2H1CW19|A0A2H1CW19_FASHE_CEP44_domain-containing_protein_OS=Fasciola_hepatica_OX=6192_GN=D915_00652_PE=4_SV=1	A0A2H1CW19	87.4	0	1128.2	98.5	88.5
maker-scaffold10x_917_pilon-snap-gene-0.41-mRNA-1_transcript=maker-scaffold10x_917_pilon-snap-gene-0.41-mRNA-1_gene=maker-scaffold10x_917_pilon-snap-gene-0.41	A0A2H1CW46|A0A2H1CW46_FASHE_EF_hand_OS=Fasciola_hepatica_OX=6192_GN=D915_00659_PE=4_SV=1	A0A2H1CW46	99.7	0	1785.4	98.6	79.7
maker-scaffold10x_964_pilon-snap-gene-0.21-mRNA-1_transcript=maker-scaffold10x_964_pilon-snap-gene-0.21-mRNA-1_gene=maker-scaffold10x_964_pilon-snap-gene-0.21	A0A2H1CW57|A0A2H1CW57_FASHE_Fic_family_protein_OS=Fasciola_hepatica_OX=6192_GN=D915_00651_PE=4_SV=1	A0A2H1CW57	99.8	9.1e-259	901.7	78.1	91
maker-scaffold10x_964_pilon-augustus-gene-0.6-mRNA-1_transcript=maker-scaffold10x_964_pilon-augustus-gene-0.6-mRNA-1_gene=maker-scaffold10x_964_pilon-augustus-gene-0.6	A0A2H1CW70|A0A2H1CW70_FASHE_Ribosomal_protein_S3_OS=Fasciola_hepatica_OX=6192_GN=D915_000449_PE=3_SV=1	A0A2H1CW70	100	1.3e-123	451.4	100	100
maker-scaffold10x_802_pilon-snap-gene-0.48-mRNA-1_transcript=maker-scaffold10x_802_pilon-snap-gene-0.48-mRNA-1_gene=maker-scaffold10x_802_pilon-snap-gene-0.48	A0A2H1CW72|A0A2H1CW72_FASHE_Cadherin_domain_protein_OS=Fasciola_hepatica_OX=6192_GN=D915_00642_PE=4_SV=1	A0A2H1CW72	99.8	0	2323.1	69	98.3
maker-scaffold10x_1106_pilon-snap-gene-0.7-mRNA-1_transcript=maker-scaffold10x_1106_pilon-snap-gene-0.7-mRNA-1_gene=maker-scaffold10x_1106_pilon-snap-gene-0.7	A0A2H1CW75|A0A2H1CW75_FASHE_GT23_domain-containing_protein_OS=Fasciola_hepatica_OX=6192_GN=D915_01291_PE=3_SV=1	A0A2H1CW75	95.8	2e-53	218.8	36.5	55.1
maker-scaffold10x_1189_pilon-snap-gene-0.112-mRNA-1_transcript=maker-scaffold10x_1189_pilon-snap-gene-0.112-mRNA-1_gene=maker-scaffold10x_1189_pilon-snap-gene-0.112	A0A2H1CWC5|A0A2H1CWC5_FASHE_ANTP_class_homeobox_transcription_factor_ANTP72_OS=Fasciola_hepatica_OX=6192_GN=D915_000861_PE=4_SV=1	A0A2H1CWC5	99.3	0	1094.3	100	100
maker-scaffold10x_13_pilon-snap-gene-0.69-mRNA-1_transcript=maker-scaffold10x_13_pilon-snap-gene-0.69-mRNA-1_gene=maker-scaffold10x_13_pilon-snap-gene-0.69	A0A2H1CWC9|A0A2H1CWC9_FASHE_Acetyltransferase,_GNAT_family_OS=Fasciola_hepatica_OX=6192_GN=D915_00593_PE=4_SV=1	A0A2H1CWC9	95.1	7.7e-95	355.5	100	100
augustus_masked-scaffold10x_917_pilon-processed-gene-0.27-mRNA-1_transcript=augustus_masked-scaffold10x_917_pilon-processed-gene-0.27-mRNA-1_gene=augustus_masked-scaffold10x_917_pilon-processed-gene-0.27	A0A2H1CWF4|A0A2H1CWF4_FASHE_POU_domain_protein_OS=Fasciola_hepatica_OX=6192_GN=D915_00534_PE=3_SV=1	A0A2H1CWF4	95.5	0	1423.7	100	50.2
[truncated: 8,475 more rows]

## Sheet: MEROPS homologues
F. hepatica protein ID	MEROPS peptidase	MEROPS ID	Family	Subfamily	Catalytic type	Identical matches (%)	Expected value	Bit score	Query coverage per HSP	Subject coverage per HSP
[truncated: 9,708 more rows]
